# Supplementary material
Source: HighWire-hosted journal article supplement (doi:10.1101/rna.052969.115)
Supplement: SuppTables1_4_5_7_8.docx [file SuppTables1_4_5_7_8.docx]

**Supplementary Tables**

**Table S1. Sequencing depth by RASL-Seq and mRNA-Seq.**

| Experiment | Total mapped reads | Exons queried | Reads per junction pair (median) | Reads per junction pair (m.a.d.) |
| --- | --- | --- | --- | --- |
| RASL-Seq | 67,264,257 | 3,287 | 59 | 87 |
| RNA-Seq | 324,210,866 | 70,546 | 13 | 19 |

**Table S4. Data for Figure 1E comparing rMATS/RASL calculated PSI upon hnRNP L knockdown to RT-PCR derived values.**

| Gene Name | Alt Exon Coordinates | RASL/MATS  PSI | RT-PCR  PSI | Condition |
| --- | --- | --- | --- | --- |
| DIAPH1 | chr5:140967790-140967817- | -1.7 | 2 | Un |
| FNBP1 | chr9:132686122-132686275- | -0.7 | 0 | Un |
| FNBP1 | chr9:132686122-132686275- | 0.4 | 0 | S |
| NCK2 | chr2:106497783-106498505+ | -2.7 | -1 | Un |
| NCK2 | chr2:106497783-106498505+ | -0.3 | -2 | S |
| SLC19A2 | chr1:169446392-169446995- | 1.5 | 0 | S |
| FYN | chr6:112020718-112020873- | 0.3 | 5 | Un |
| FYN | chr6:112020718-112020873- | 1.7 | 4 | S |
| IP6K2 | chr3:48732126-48732257- | -25 | 0 | Un |
| IP6K2 | chr3:48732126-48732257- | -53 | -12 | S |
| TOP3B | chr22:22325351-22325433- | -59 | -18 | Un |
| TOP3B | chr22:22325351-22325433- | -45 | -11 | S |
| GAR1 | chr4:110737308-110737534+ | -26 | -23 | S |
| PUF60 | chr8:144906482-144906566- | -9 | -8 | Un |
| PUF60 | chr8:144906482-144906566- | -18 | -18 | S |
| SRRM1 | chr1:24989673-24989715+ | -26 | -15 | Un |
| SRRM1 | chr1:24989673-24989715+ | -20 | -13 | S |
| HES4 | chr1:935071-935167- | -15 | -5 | Un |
| HES4 | chr1:935071-935167- | -26 | 2 | S |
| SLC39A4 | chr8:145638620-145638773- | -11 | -53 | Un |
| MPPE1 | chr18:11884877-11885042- | 57 | 20 | Un |
| MPPE1 | chr18:11884877-11885042- | 50 | 32 | S |
| HUWE1 | chrx:53652746-53652989- | 17 | 19 | Un |
| HUWE1 | chrx:53652746-53652989- | 39 | 14 | S |
| SMAD2 | chr18:45396845-45396935- | 17 | 10 | Un |
| SMAD2 | chr18:45396845-45396935- | 19 | 10 | S |
| STK40 | chr13:68334483-6833685- | 26 | 11 | Un |
| STK40 | chr13:68334483-6833685- | 27 | -3 | S |
| TMEM219 | chr16:29983362-29983461+ | 24 | 14 | Un |
| TMEM219 | chr16:29983362-29983461+ | 31 | 18 | S |
| MYBL1 | chr8:67478298-67478478- | 74 | 54 | Un |
| ZMIZ2 | | chr7:44789413-44789579+ | | --- | | 55 | -6 | Un |
| ZNF584 | chr19:58921331-58921458+ | 50 | 10 | Un |
| SP100 | chr2:231282305-231282380+ | 42 | 13 | Un |
| SP100 | chr2:231282305-231282380+ | 23 | -20 | S |
| TUBD1 | chr17:57951899-57952064- | 50 | 24 | Un |
| ALKBH3 | chr11:43913590-43913679+ | 15 | 22 | Un |
| E2F8 | chr11:19256290-19256605- | 12 | 20 | Un |
| GPBP1 | chr5:56532939-56532999+ | 25 | 46 | Un |
| GPBP1 | chr5:56532939-56532999+ | 30 | 49 | S |
| ZRANB2 | chr1:71531360-71531435- | 32 | 19 | Un |
| ZRANB2 | chr1:71531360-71531435- | 38 | 27 | S |
| TRIM26 | chr6:30172432-30172542- | 13 | 21 | S |
| PUM2 | chr2:20478343-20478480- | 23 | 21 | Un |
| PUM2 | chr2:20478343-20478480- | 24 | 15 | S |
| NFAT5 | chr16:69602,397-69602451+ | 12 | 10 | Un |
| NFAT5 | chr16:69602397-69602451+ | 17 | 17 | S |
| ARAP1 | chr11:72403797-72403830- | 20 | 16 | Un |
| ARAP1 | chr11:72403797-72403830- | 38 | 25 | S |
| CARD8 | chr19:48741639-48741789- | -26 | -28 | Un |
| FOXM1 | chr12:2974520-2974565- | 19 | 17 | Un |
| FOXM1 | chr12:2974520-2974565- | 28 | 14 | S |
| KDM6A | chrX:44919853-44920009+ | 51 | 46 | Un |
| KDM6A | chrX:44919853-44920009+ | 54 | 51 | S |

Conditions are defined as Unstimulated (Un) or Stimulated with PMA (S). In all cases PSI is calculated as PSIKD-PSIWT. In instances in which an exon was queried by both RASL-Seq and rMATS we report the RASL-Seq value. Grey text indicate events for which RT-PCR analysis was opposite to the splicing quantification from the high throughput sequencing methods.

**Table S5. GO terms enriched in mRNAs harboring hnRNP L-enhanced or –repressed exons compared to mRNAs expressed in Jurkat cells** (p-value < 0.05, fold enrichment >1.5).

| Regulation | Term (category) | Count | P value | Fold Enrichment | Gene Names |
| --- | --- | --- | --- | --- | --- |
| Enhanced | RNA binding (MF) | 15 | 0.0161 | 1.98 | SRRM2,MBNL1,JAKMIP1,HNRNPA2B1,GAR1,ILF3,DHX34,RBMS1,RALY,TIA1,FBL,TRNAU1AP,SRRM1,PUF60,ZNF638 |
|  |  |  |  |  |  |
| Repressed | Transcription (BP) | 54 | 8.17E-4 | 1.54 | TBL1XR1,SREBF2,NFAT5,WHSC1,MEF2A,CCAR1,IFI16,CDCA7L,SCML2,FAM120B,SMAD2,ZNF362,FOXN3,POLR2D,TAF1A,MYBL1,TTLL5,MED24,ECD,ZNF292,ZMIZ2,LIN54,BAZ2B,CTCF,GTF2H3,MXI1,GPBP1,TEAD4,BBX,FOXM1,TCOF1,EYA3,PLAGL1,ZNF562,ZNF584,NPAS1,EZH2,ZNF678,ACAD8,HMG20A,PPARGC1B,GTF2A2,NRIP1,PRDM2,C10orf137,PBX3,HIPK3,BCL11A,SUV420H1,MLL5,MORF4L2,DAXX,ASCC2,HDAC10 |
|  | Chromatin modification (BP) | 15 | 0.00175 | 2.61 | TBL1XR1,WHSC1,DNMT3B,EP400,CTCF,UBE2B,EYA3,EZH2,HMG20A,SUV420H1,MORF4L2,MLL5,HUWE1,HDAC10,KDM6A |
|  | Chromosome organization (BP) | 18 | 0.0132 | 1.90 | TBL1XR1,WHSC1,DNMT3B,EP400,CTCF,UBE2B,EYA3,FBXO4,EZH2,KIF18A,HMG20A,SUV420H1,MORF4L2,MLL5,APC,HUWE1,HDAC10,KDM6A |
|  | Response to DNA damage stimulus (BP) | 16 | 0.0135 | 2.00 | GEN1,IFI16,FOXN3,SP100,RAD23B,BAX,CHEK1,NEIL3,GTF2H3,PCBP4,MRPS11,UBE2B,EYA3,MORF4L2,APC,APLF |
|  | Chromatin organization (BP) | 15 | 0.0139 | 2.06 | TBL1XR1,WHSC1,DNMT3B,EP400,CTCF,UBE2B,EYA3,EZH2,HMG20A,SUV420H1,MORF4L2,MLL5,HUWE1,HDAC10,KDM6A |
|  | Positive regulation of transcription, DNA-dependent (BP) | 15 | 0.0142 | 2.05 | TBL1XR1,SREBF2,NFAT5,SMAD2,SP100,ZMIZ2,CTCF,MEIS2,TEAD4,PLAGL1,PPARGC1B,GTF2A2,NRIP1,MORF4L2,MLL5 |
|  | Positive regulation of macromolecule metabolic process (BP) | 23 | 0.0147 | 1.70 | TBL1XR1,SREBF2,NFAT5,DNMT3B,BTRC,AKT2,FNTA,SMAD2,SP100,ZMIZ2,CTCF,MEIS2,TEAD4,EYA3,PLAGL1,FBXO4,PPARGC1B,GTF2A2,NRIP1,PTPRC,MORF4L2,MLL5,APC |
|  | Positive regulation of RNA metabolic process (BP) | 15 | 0.0157 | 2.02 | TBL1XR1,SREBF2,NFAT5,SMAD2,SP100,ZMIZ2,CTCF,MEIS2,TEAD4,PLAGL1,PPARGC1B,GTF2A2,NRIP1,MORF4L2,MLL5 |
|  | Cellular response to stress (BP) | 20 | 0.0175 | 1.77 | GEN1,IFI16,FOXN3,SP100,ATG9A,RAD23B,BAX,CHEK1,NEIL3,GTF2H3,PCBP4,MRPS11,UBE2B,EYA3,ATG4C,MBIP,MORF4L2,APC,DAXX,APLF |
|  | Positive regulation of nucleotide/ nucleic acid metabolic process (BP) | 17 | 0.0310 | 1.76 | TBL1XR1,SREBF2,NFAT5,SMAD2,SP100,ZMIZ2,CTCF,MEIS2,TEAD4,EYA3,PLAGL1,PPARGC1B,GTF2A2,NRIP1,PTPRC,MORF4L2,MLL5 |
|  | Transcription cofactor activity (MF) | 14 | 0.0314 | 1.91 | TBL1XR1,DNMT3B,SP100,MED24,ECD,ZMIZ2,MEIS2,CTCF,MXI1,PPARGC1B,GTF2A2,NRIP1,BCL11A,MLL5 |
|  | Positive regulation of gene expression (BP) | 16 | 0.0329 | 1.79 | TBL1XR1,SREBF2,NFAT5,DNMT3B,SMAD2,SP100,ZMIZ2,CTCF,MEIS2,TEAD4,PLAGL1,PPARGC1B,GTF2A2,NRIP1,MORF4L2,MLL5 |
|  | Enzyme binding (MF) | 17 | 0.0366 | 1.72 | RNF138,AURKA,SMAD2,SP100,PLK1S1,CHEK1,BCHE,CDK5RAP2,UBE2B,RANBP3,ADD3,NRIP1,PTPRC,UBE2K,MLL5,APC,HDAC10 |
|  | Positive regulation of macromolecule biosynthetic process (BP) | 17 | 0.0372 | 1.72 | TBL1XR1,SREBF2,NFAT5,AKT2,FNTA,SMAD2,SP100,ZMIZ2,CTCF,MEIS2,TEAD4,PLAGL1,PPARGC1B,GTF2A2,NRIP1,MORF4L2,MLL5 |

**Table S7. Overlap of hnRNP L-regulated exons and exons flanked by short GC-rich introns**

|  |  | **L-enhanced exons** | **L-repressed exons** | **L-unresponsive exons** |
| --- | --- | --- | --- | --- |
|  |  | **177** | **352** | **250** |
| **Total exons flanked by short GC-rich introns**  **(<2 kb, >45% GC)** | **46,801** | 35 / 46,801  (0.075%, p=0.0444) | 24 / 46,801  (0.051%, p=1) | 25 / 46,801  (0.053%, control) |
| 35 / 117  (19.8%, p = 8.2e-5) | 24 / 352  (6.8%, p=0.05) | 25 / 250  (10%, control) |

**Table S8. Primers used for RT-PCR and qPCR in this study.**

**RT-PCR**

| Gene Name | Forward Primer | Reverse Primer |
| --- | --- | --- |
| DIAPH1 | cggagcccagatgagctgcc | gcagaagaatttctatgagcagaattgg |
| FNBP1 | TCACAGCTGGTAATAGAAGCTTATAAATCA | TTGATCCATCTCCTTCTGAATTTCTTTATT |
| NCK2 | GGAAGAACAGCCTGAAGAAGGGCTCC | GTTTGTTCTTCCCTGACGCTTTAAGGG |
| SLC19A2 | ATGGATGTGCCCGGCCCGGTG | AGTAAGGTTGAAACGGCCTCCACG |
| FYN | AGAGAGCTGCAGGTCTCTGCTGCCG | CTCGGTGACGATGTAGATGGGCTCC |
| TOP3B | CTGCGACTACATCGTGCTGTGGC | CCATGGCATTACAGATGTCTGTGTCC |
| GAR1 | ctgttatacgtcacttccacggctcagcg | ctgcagtggcagcagcttatatggg |
| PUF60 | caagatggcgacggcgaccatagc | gtctgcttcaccagcacactcttgatgc |
| SRRM1 | TTCCCGGAGTGCTTCTCCATCACC | GAGTATCTTCTAGGAGAAGGTGAGCG |
| HES4 | cggaccccagacaagccccggagc | cggttcacctccgccagacactcg |
| SLC39A4 | gctgaaccctgagcccaggagactgagc | cgcagagtgctacgtagaggaacaggc |
| MPPE1 | gctcctgcagaggaaagggacatccc | ggtgtagtctgtgggcgtcatgctacc |
| HUWE1 | CCTGGATATGGCAGCTTTTCAATCCCATAGTGG | CATGTCGTATGCCATCTGAGAAAGCAGGG |
| SMAD2 | ggacgattagatgagcttgagaaagccatcacc | ggtgtctcaactctctgatagtggtaaggg |
| STK40 | ctatgggcgaatagctctgaccaccc | cttcagctgatagaagtcatccgtgcc |
| TMEM219 | GAGGAGCTGGCTCTGTGTGGCTCCAGG | CTCAGAGCCAAGGCCCAAGAAGTTGATTCACAC |
| MYBL1 | GAGGAAGATGAACCTGCTTACAAAAGCTGC | CAGTATGAGAGCTCTTGAAGTACTACTGGTAGC |
| ZMIZ2 | GACTGCGAGCAGGAAGAGCGCAGTGG | CCAAGGCACAGACTCATATGCGAATGAACC |
| ZNF584 | GGTTCTGCCCGCACGGTCCAATGG | CTGCACAGATACAGAGAAGGGCAATGAGG |
| SP100 | CTAGGGTGGGAAGATGGCAGGTGG | GAGATCACGATCACGGAGGCCCTCG |
| TUBD1 | GATCTGTGCAAAACTGATGAATATCAAGCAGATCTCC | CCCACGAAGAATGACCAAGTTAGCAATGG |
| ALKBH3 | GGCTTTGTTGACGTGAAAGAAGCTGACTGG | GCGATAAAGATTGCAGAGTAAGGAGTTGAAGGTGTGG |
| E2F8 | AAAAGTTTAGGATTATTGTGTCATAAGTTC | TCCCCAATTAAAATCTTGGCAGCAACTTCT |
| GPBP1 | GAGAGAGAACCAAATCACAATAAGTCTTTAGCTGCAGG | CCAGTTCCATTCTTAACTGGCTGTGACGG |
| ZRANB2 | cgaaaaagatcttattcaagttcatcatcttctcc | cattatttcttttttgaacttgaacgggaacc |
| TRIM26 | GGATTCGCGGCCCGGAGCTCGG | GCCACAGTCAATGGTCACAGGGTCC |
| PUM2 | CAGCAGCAGCAGCAGCTGGAG GAA | TAGAACCATGCTGGTCTTGAGAAA ACT CAA |
| NFAT5 | cgatgccctcggacttcatctcattgc | gctgaggagcagctctccacttgc |
| ARAP1 | cctcaggtggcttccacgatcgc | ggcctgagtttcttcttcactcccagg |
| CARD8 | GATACAGTAAAGACATAAATACCACATTTGACAAATGG | GATAGTTGACACTCAGGAACAGCACGG |
| FOXM1 | CTCCATCCGCCACAACCTTTCCCTGC | GGGAGTTCGGTTTTGATGGTCATGTTCCG |

**qPCR**

| Gene Name | Forward Primer | Reverse Primer |
| --- | --- | --- |
| PUF60 | GCAGGTCAATGGCCAGCAAGG | GCTTAAGGTCAGTACCTGTGGAGG |
| TOP3B-3 | ACTGGGAATAAGTGGCTTCA | GCCTTTGCATCTGGGAATG |
| SLC39A4 | CTGCCCTATATGATCACTCTGGG | GTCTTCCAGGAGGACGCGAAGG |
| USF2_b | CAGCAGGCTGTGACCCA | ACCTACCAGCGGGAAG |
| MAPK11_2 | CTTCCAGTCGCTGATCCAC | CTCGTGCTTCAGGTGCTT |
| CD45 E4 | GCAAAGATGCCCAGTGTTCCACTT | TTCTCTTTCAAAGGTGCTTGCGGG |
| CD45 E5 | TCATCAGTACAGACGCCTCACCTT | CTGAATGTCTGCGTGTCAGTTCCA |
| IP6K2 | CTTGATCACAGTAACCCATAGTCC | GGTTTCCTGGAGGACAAAAAGCAGG |
| FYN | TTCTTCTCCAGACACAACGAAC | TGATTGCATCGAGTTGTACCC |
