# Supplementary material
Source: HighWire-hosted journal article supplement (doi:10.1101/rna.052969.115)
Supplement: Table_S2.xlsx [file Table_S2.xlsx]

## Sheet: R-MATS WT vs L KD unstimulated
MATS_ID	GeneID	geneSymbol	chr	strand	exonStart_0base	exonEnd	upstreamES	upstreamEE	downstreamES	downstreamEE	ID	IC_SAMPLE_1	SC_SAMPLE_1	IC_SAMPLE_2	SC_SAMPLE_2	IncFormLen	SkipFormLen	PValue	FDR	IncLevel1	IncLevel2	IncLevelDifference
65313	ENSG00000105202	FBL	chr19	-	40331256	40331427	40331053	40331155	40336930	40337054	65313	2153581	1,11	594485	27851	242	85	1.48e-12	8.02e-08	0.987,0.991	0.434,0.649	0.448
59781	ENSG00000109685	WHSC1	chr4	+	1944065	1944159	1941380	1941505	1952798	1952930	59781	19124	40430	47283	8258	170	85	2e-09	5.42e-05	0.192,0.126	0.746,0.354	-0.391
25914	ENSG00000081237	PTPRC	chr1	+	198665840	198666038	198661475	198661502	198668692	198668833	25914	25640	11125	2552296	4,55	204	20	1.54e-08	0.000278829	0.182,0.334	0.862,0.804	-0.575
70508	ENSG00000176731	C8orf59	chr8	-	86131464	86131592	86129614	86129731	86132534	86132650	70508	95631	42280	21262	44408	199	85	6.45e-08	0.000874783	0.491,0.49	0.169,0.215	0.299
44937	ENSG00000163565	IFI16	chr1	+	159015086	159015254	159002313	159002481	159021468	159021888	44937	1571243	23230	1041305	0,42	239	85	2.95e-07	0.00320714	0.708,0.658	1.0,0.917	-0.275
70510	ENSG00000176731	C8orf59	chr8	-	86131551	86131592	86129614	86129731	86132534	86132604	70510	24205	42280	5101	44408	46	63	6.11e-07	0.00552732	0.439,0.501	0.135,0.253	0.276
70511	ENSG00000176731	C8orf59	chr8	-	86131464	86131589	86129614	86129731	86132534	86132582	70511	82533	42280	19194	44408	152	41	9.77e-07	0.00757581	0.345,0.339	0.104,0.114	0.233
47982	ENSG00000112234	FBXL4	chr6	-	99382637	99382755	99353301	99353546	99395681	99395802	47982	0,43	1,37	4,39	0,0	189	85	5.42e-06	0.0367745	0.0,0.343	1.0,1.0	-0.829
12763	ENSG00000185697	MYBL1	chr8	-	67478298	67478478	67476906	67477060	67478918	67479023	12763	2,32	3,39	7,41	0,2	251	85	6.29e-06	0.0379365	0.184,0.217	1.0,0.874	-0.737
44946	ENSG00000163565	IFI16	chr1	+	159019221	159019389	159002313	159002481	159021468	159021888	44946	1321969	23230	901892	0,42	239	85	1.39e-05	0.0755768	0.671,0.753	1.0,0.941	-0.258
70509	ENSG00000176731	C8orf59	chr8	-	86127149	86127266	86126790	86126860	86129614	86129731	70509	182311	2,31	70294	13,90	166	63	1.83e-05	0.0892942	0.972,0.792	0.671,0.554	0.269
3765	ENSG00000109534	GAR1	chr4	+	110737308	110737534	110736708	110736960	110739091	110739246	3765	18408	0,0	3196	7,78	297	85	1.97e-05	0.0892942	1.0,1.0	0.109,0.418	0.736
35822	ENSG00000159216	RUNX1	chr21	-	36265221	36265260	36259139	36259393	36421138	36421641	35822	1137	11244	5181	2135	64	85	3.57e-05	0.148938	0.108,0.427	0.769,0.64	-0.437
65320	ENSG00000198521	none_found	chr19	-	22025946	22026128	22001896	22002023	22034706	22034830	65320	0,42	4,55	1100	0,22	253	85	4.04e-05	0.151392	0.0,0.204	1.0,0.604	-0.7
49526	ENSG00000143569	UBAP2L	chr1	+	154241837	154241888	154241235	154241430	154242675	154242759	49526	2,39	12,98	2,81	0,61	80	77	4.18e-05	0.151392	0.138,0.277	1.0,0.561	-0.573
40936	ENSG00000177150	FAM210A	chr18	-	13671860	13671972	13663349	13666712	13681603	13682104	40936	19103	8,52	24135	0,16	183	85	5.8e-05	0.196817	0.525,0.479	1.0,0.797	-0.397
30461	ENSG00000111596	CNOT2	chr12	+	70726546	70726626	70713077	70713144	70729217	70729343	30461	11,29	9,71	7,46	1,16	121	60	7.53e-05	0.230863	0.377,0.168	0.776,0.588	-0.409
5132	ENSG00000133226	SRRM1	chr1	+	24989673	24989715	24989150	24989295	24993305	24993416	5132	27257	19166	11190	40215	70	85	7.65e-05	0.230863	0.633,0.653	0.25,0.518	0.259
64398	ENSG00000181038	METTL23	chr17	+	74725771	74725876	74722949	74723260	74729059	74729297	64398	1,61	3,69	4156	1,41	176	85	0.000103712	0.296328	0.139,0.299	0.659,0.648	-0.435
8838	ENSG00000072071	LPHN1	chr19	-	14277827	14277842	14273417	14274218	14281493	14281603	8838	0,34	10161	3,53	6,89	16	85	0.000134747	0.36575	0.0,0.529	0.726,0.76	-0.479
50703	ENSG00000128699	ORMDL1	chr2	-	190647739	190647849	190647147	190647328	190648994	190649097	50703	1,70	13492	10219	4321	181	85	0.000174588	0.442679	0.035,0.063	0.54,0.243	-0.343
65318	ENSG00000198521	none_found	chr19	-	22028193	22028308	22001896	22002023	22034706	22034830	65318	2,33	4,55	7,89	0,22	186	85	0.000187116	0.442679	0.186,0.215	1.0,0.649	-0.624
12507	ENSG00000179526	SHARPIN	chr8	-	145153983	145154108	145153535	145153897	145154179	145154225	12507	116429	4,34	34590	13109	150	39	0.000194494	0.442679	0.883,0.766	0.405,0.585	0.33
55386	ENSG00000135069	PSAT1	chr9	+	80942966	80943104	80932591	80932720	80943896	80945009	55386	1241223	16196	1341544	3,65	209	85	0.000195706	0.442679	0.759,0.717	0.948,0.906	-0.189
16957	ENSG00000157216	SSBP3	chr1	-	54723741	54723822	54722799	54722859	54747110	54747200	16957	2,71	4,94	10183	0,84	114	51	0.000249326	0.541407	0.183,0.253	1.0,0.494	-0.529
51499	ENSG00000011304	PTBP1	chr19	+	805491	805569	805012	805187	806407	806556	51499	201149	221047	451905	14870	142	85	0.000315266	0.617463	0.352,0.396	0.658,0.567	-0.239
14195	ENSG00000078140	UBE2K	chr4	+	39757276	39757359	39699782	39700010	39776453	39776553	14195	46425	7219	39467	0,58	152	85	0.000322218	0.617463	0.786,0.52	1.0,0.818	-0.256
25514	ENSG00000049618	ARID1B	chr6	+	157357968	157358010	157256599	157256710	157405795	157406039	25514	0,42	9166	5,64	7,92	70	85	0.000330028	0.617463	0.0,0.235	0.464,0.458	-0.344
6073	ENSG00000187239	FNBP1	chr9	-	132686122	132686305	132671168	132671278	132687238	132687436	6073	98591	143495	27169	98383	254	85	0.000353126	0.617463	0.187,0.285	0.084,0.129	0.129
20254	ENSG00000129810	SGOL1	chr3	-	20215740	20216547	20212534	20212724	20218092	20218151	20254	210556	3,45	207718	0,9	845	52	0.000389815	0.617463	0.812,0.432	1.0,0.831	-0.294
44680	ENSG00000143776	CDC42BPA	chr1	-	227239581	227239686	227235627	227235711	227257477	227257554	44680	1,0	3,12	3,29	6,7	153	62	0.000398572	0.617463	0.119,0.0	0.168,0.627	-0.338
15720	ENSG00000137720	C11orf1	chr11	+	111753859	111753926	111753091	111753322	111754494	111754624	15720	20165	4,38	32198	1,3	120	85	0.000398862	0.617463	0.78,0.755	0.958,0.979	-0.201
30557	ENSG00000169221	TBC1D10B	chr16	-	30371047	30371162	30369983	30370138	30380548	30381585	30557	6121	2,36	5145	0,6	186	85	0.000425089	0.617463	0.578,0.606	1.0,0.917	-0.367
26955	ENSG00000131374	TBC1D5	chr3	-	17603510	17603634	17549965	17550097	17665340	17665405	26955	1,5	5,33	4,28	1,18	168	58	0.000432003	0.617463	0.065,0.05	0.58,0.349	-0.407
24226	ENSG00000060339	CCAR1	chr10	+	70516282	70516389	70515232	70515293	70517050	70517134	24226	2,17	4,30	3,80	0,8	139	46	0.000454473	0.617463	0.142,0.158	1.0,0.768	-0.734
25807	ENSG00000068745	IP6K2	chr3	-	48732126	48732257	48730920	48731673	48732522	48732851	25807	17182	5,68	17176	15185	202	85	0.000475426	0.617463	0.589,0.53	0.323,0.286	0.255
5202	ENSG00000111711	GOLT1B	chr12	+	21659818	21659910	21654750	21654882	21665228	21665310	5202	11144	7135	21119	3,37	160	75	0.00048041	0.617463	0.424,0.333	0.766,0.601	-0.305
50591	ENSG00000134815	DHX34	chr19	+	47880171	47880246	47879699	47879817	47880356	47880463	50591	5196	2,38	0,171	5119	136	85	0.000485092	0.617463	0.61,0.763	0.0,0.473	0.45
37945	ENSG00000133460	SLC2A11	chr22	+	24219571	24220056	24219228	24219358	24224645	24224833	37945	0,54	5,75	2143	0,41	556	85	0.000492435	0.617463	0.0,0.099	1.0,0.348	-0.625
70945	ENSG00000070501	POLB	chr8	+	42202470	42202537	42195976	42196203	42229080	42229283	70945	2,55	2,32	4,54	0,5	120	85	0.00053644	0.617463	0.415,0.549	1.0,0.884	-0.46
48446	ENSG00000105483	CARD8	chr19	-	48741639	48741783	48737077	48737800	48744218	48744320	48446	10,99	4,39	7,95	0,6	215	85	0.000540039	0.617463	0.497,0.501	1.0,0.862	-0.432
73217	ENSG00000055917	PUM2	chr2	-	20478343	20478580	20462953	20463221	20482707	20482992	73217	63678	5113	90903	1,30	308	85	0.000547332	0.617463	0.777,0.623	0.961,0.893	-0.227
22677	ENSG00000198408	MGEA5	chr10	-	103553669	103553755	103552595	103552700	103557736	103557911	22677	18157	6,79	9248	0,37	158	85	0.000549996	0.617463	0.617,0.517	1.0,0.783	-0.325
65798	ENSG00000109674	NEIL3	chr4	+	178262629	178262796	178257261	178257475	178274461	178274882	65798	10163	7,67	13166	3,14	238	85	0.000557447	0.617463	0.338,0.465	0.607,0.809	-0.306
37369	ENSG00000128595	CALU	chr7	+	128394582	128394776	128379345	128379486	128398924	128398999	37369	13310	2,97	17283	0,22	248	68	0.000564385	0.617463	0.641,0.467	1.0,0.779	-0.335
6502	ENSG00000084693	AGBL5	chr2	+	27291915	27291962	27291499	27291612	27292440	27292574	6502	5,36	0,6	0,39	3,28	80	85	0.000567302	0.617463	1.0,0.864	0.0,0.597	0.634
49238	ENSG00000127152	BCL11B	chr14	-	99697681	99697894	99635623	99642532	99723807	99724176	49238	761068	33412	1951732	17386	284	85	0.000570796	0.617463	0.408,0.437	0.774,0.573	-0.251
50439	ENSG00000028203	VEZT	chr12	+	95656681	95656857	95645715	95645847	95660132	95660408	50439	16291	5,42	41273	0,9	247	85	0.000571559	0.617463	0.524,0.705	1.0,0.913	-0.342
60060	ENSG00000140511	HAPLN3	chr15	-	89422648	89423841	89422197	89422500	89424587	89424956	60060	8353	0,18	2127	1,46	1264	85	0.000572262	0.617463	1.0,0.569	0.119,0.157	0.647
18415	ENSG00000119866	BCL11A	chr2	-	60687816	60688879	60679634	60679801	60689416	60689559	18415	1502268	30176	2025398	16125	1134	85	0.000581081	0.617463	0.273,0.491	0.486,0.764	-0.243
26633	ENSG00000196792	STRN3	chr14	-	31388171	31388312	31382729	31382863	31404368	31404510	26633	1,30	8,91	3,55	1,41	212	85	0.000582632	0.617463	0.048,0.117	0.546,0.35	-0.366
20692	ENSG00000163913	IFT122	chr3	+	129177441	129177520	129170756	129170841	129182402	129182465	20692	3,71	5,90	8106	2,41	108	49	0.000596443	0.617463	0.214,0.264	0.645,0.54	-0.354
44318	ENSG00000166167	BTRC	chr10	+	103290993	103291090	103285769	103285956	103292051	103292189	44318	1,54	1,43	4,59	0,9	170	85	0.000602824	0.617463	0.333,0.386	1.0,0.766	-0.524
59785	ENSG00000109685	WHSC1	chr4	+	1944065	1944292	1941380	1941505	1952798	1952930	59785	43443	40430	96649	8258	298	85	0.000632916	0.63628	0.235,0.227	0.774,0.418	-0.365
43945	ENSG00000232593	none_found	chrX	+	53123581	53123656	53123338	53123466	53171029	53171889	43945	4,45	0,9	0,37	1,37	136	85	0.000705209	0.682896	1.0,0.758	0.0,0.385	0.687
26816	ENSG00000160201	U2AF1	chr21	-	44521475	44521542	44520562	44520629	44524424	44524586	26816	21266	50680	17445	17455	95	60	0.000712576	0.682896	0.21,0.198	0.387,0.382	-0.181
1317	ENSG00000101294	HM13	chr20	+	30155880	30156027	30154012	30154098	30156922	30157370	1317	14,93	70327	17182	17249	212	79	0.000717023	0.682896	0.069,0.096	0.271,0.214	-0.16
51490	ENSG00000011304	PTBP1	chr19	+	805512	805569	805012	805187	806407	806556	51490	10469	221047	19773	14870	100	85	0.000782313	0.732231	0.279,0.276	0.536,0.43	-0.205
23518	ENSG00000125354	41888	chrX	-	118759297	118759342	118750678	118750705	118763280	118763471	23518	59522	15,77	25443	14203	38	20	0.00080027	0.736343	0.674,0.781	0.484,0.535	0.218
2070	ENSG00000067066	SP100	chr2	+	231282305	231282380	231280980	231281043	231307651	231307814	2070	5141	3,67	12228	0,26	107	56	0.000817833	0.739962	0.466,0.524	1.0,0.821	-0.416
25791	ENSG00000068745	IP6K2	chr3	-	48732134	48732257	48731607	48731673	48732522	48732851	25791	13163	5,68	17143	15185	168	59	0.000952606	0.83263	0.477,0.457	0.285,0.214	0.217
31813	ENSG00000123562	MORF4L2	chrX	-	102939608	102939657	102931481	102931979	102940098	102940188	31813	5156	4169	7292	0,72	82	83	0.000959763	0.83263	0.559,0.483	1.0,0.804	-0.381
11337	ENSG00000105287	PRKD2	chr19	-	47217119	47217258	47214163	47214295	47219387	47220384	11337	59563	3,41	17547	7109	210	85	0.000966267	0.83263	0.888,0.848	0.496,0.67	0.285
41963	ENSG00000188428	MUTED	chr6	-	8027439	8027632	8026599	8026658	8041371	8041501	41963	4,6	5,50	8,79	1,27	231	52	0.000985314	0.834725	0.153,0.026	0.643,0.397	-0.431
69001	ENSG00000102098	SCML2	chrX	-	18260558	18260710	18257433	18259499	18264696	18264948	69001	20185	4,60	11214	0,18	223	85	0.00099945	0.834725	0.656,0.54	1.0,0.819	-0.311
27100	ENSG00000006114	SYNRG	chr17	-	35939227	35939530	35936438	35936516	35944755	35944867	27100	14172	2,27	29326	1,9	360	71	0.00106303	0.866695	0.58,0.557	0.851,0.877	-0.296
46863	ENSG00000214022	REPIN1	chr7	+	150067802	150067973	150066732	150066957	150068316	150068744	46863	19568	2,98	10389	7170	242	85	0.00106966	0.866695	0.769,0.671	0.334,0.446	0.33
69	ENSG00000131375	CAPN7	chr3	+	15287032	15287178	15283684	15283760	15288238	15288301	69	11,71	2,9	22129	0,0	172	40	0.00110548	0.882543	0.561,0.647	1.0,1.0	-0.396
28543	ENSG00000104164	PLDN	chr15	+	45895297	45895385	45879416	45879723	45897625	45897712	28543	18123	14375	10128	2133	157	80	0.00117749	0.907435	0.396,0.143	0.718,0.329	-0.254
24151	ENSG00000232527	none_found	chr1	+	148933290	148933368	148932785	148932920	148951244	148951595	24151	6,56	9,76	3107	1,49	142	85	0.00120633	0.907435	0.285,0.306	0.642,0.567	-0.309
48455	ENSG00000105483	CARD8	chr19	-	48741639	48741789	48737659	48737800	48744218	48744320	48455	30226	4,39	16272	0,6	221	85	0.00121755	0.907435	0.743,0.69	1.0,0.946	-0.257
55345	ENSG00000060971	ACAA1	chr3	-	38173086	38173129	38170780	38170879	38173416	38173437	55345	1108	2119	11184	0,79	36	14	0.00125465	0.907435	0.163,0.261	1.0,0.475	-0.526
49905	ENSG00000121897	LIAS	chr4	+	39463815	39463909	39462409	39462582	39465144	39465225	49905	0,50	2,11	3,68	0,0	159	74	0.00126588	0.907435	0.0,0.679	1.0,1.0	-0.661
64869	ENSG00000031823	RANBP3	chr19	-	5927978	5928098	5921211	5921332	5978071	5978151	64869	1130	2,18	1132	0,0	179	73	0.00129156	0.907435	0.169,0.747	1.0,1.0	-0.542
30549	ENSG00000169221	TBC1D10B	chr16	-	30376425	30376533	30369983	30370138	30380548	30381585	30549	0,36	2,36	1,36	0,6	179	85	0.00130423	0.907435	0.0,0.322	1.0,0.74	-0.709
29074	ENSG00000143393	PI4KB	chr1	-	151298647	151298849	151288048	151288985	151299746	151300133	29074	27305	8171	18547	0,105	273	85	0.0013106	0.907435	0.512,0.357	1.0,0.619	-0.375
14130	ENSG00000183955	SETD8	chr12	+	123873979	123874101	123868319	123868755	123875176	123875333	14130	29684	6171	9276	6216	193	85	0.00131165	0.907435	0.68,0.638	0.398,0.36	0.28
31876	ENSG00000106976	DNM1	chr9	+	131010202	131010214	131009653	131009765	131010861	131011032	31876	3,67	0,4	1,46	2121	10	85	0.00132483	0.907435	1.0,0.993	0.81,0.764	0.209
5662	ENSG00000197965	MPZL1	chr1	+	167742472	167742605	167734819	167734986	167757056	167757081	5662	20460	2133	17377	0,28	137	18	0.00132495	0.907435	0.568,0.312	1.0,0.639	-0.38
36694	ENSG00000254093	PINX1	chr8	-	10677702	10677779	10622472	10623426	10683661	10683754	36694	12,27	6,11	7,90	0,5	140	85	0.00133724	0.907435	0.548,0.598	1.0,0.916	-0.385
63558	ENSG00000132780	NASP	chr1	+	46072992	46074009	46072153	46072263	46078840	46078920	63558	2116638	26519	233449	12866	1076	73	0.00135404	0.90749	0.355,0.465	0.115,0.213	0.246
70	ENSG00000131375	CAPN7	chr3	+	15282959	15283095	15282260	15282360	15283684	15283760	70	4,73	4,12	17125	0,3	191	69	0.00138223	0.915088	0.265,0.687	1.0,0.938	-0.493
6310	ENSG00000174032	SLC25A30	chr13	-	45983061	45983209	45980017	45980112	45985496	45985615	6310	9106	1,21	13119	0,2	219	85	0.00143553	0.93124	0.777,0.662	1.0,0.958	-0.259
7115	ENSG00000160828	none_found	chr7	-	74299833	74299941	74299454	74299569	74300249	74300329	7115	10127	1,28	7147	3101	167	73	0.00144094	0.93124	0.814,0.665	0.505,0.389	0.293
43787	ENSG00000143164	DCAF6	chr1	+	168007608	168007726	167973770	167974031	168012262	168012378	43787	6,98	2,36	14125	0,11	189	85	0.00147413	0.941484	0.574,0.55	1.0,0.836	-0.356
16908	ENSG00000157045	NTAN1	chr16	-	15141711	15141777	15141298	15141407	15149747	15149921	16908	8254	5126	10224	0,44	118	85	0.00149909	0.943029	0.535,0.592	1.0,0.786	-0.33
32281	ENSG00000112078	KCTD20	chr6	+	36437828	36438034	36410543	36410888	36449338	36449536	32281	30553	6153	42648	2,68	277	85	0.00151741	0.943029	0.605,0.526	0.866,0.745	-0.24
69970	ENSG00000070081	none_found	chr11	+	17358894	17359081	17352448	17352530	17370891	17371509	69970	39108	0,52	49143	18132	248	75	0.00152866	0.943029	1.0,0.386	0.452,0.247	0.344
58050	ENSG00000071054	MAP4K4	chr2	+	102487955	102488147	102486756	102486877	102490108	102490226	58050	90875	64566	1411361	43463	263	85	0.00159385	0.95222	0.312,0.333	0.515,0.487	-0.179
57706	ENSG00000121621	KIF18A	chr11	-	28112163	28112274	28110070	28110268	28112955	28113060	57706	20125	2,27	26114	0,0	182	85	0.00160973	0.95222	0.824,0.684	1.0,1.0	-0.246
50449	ENSG00000028203	VEZT	chr12	+	95650325	95650398	95645720	95645847	95660132	95660409	50449	5,50	5,42	8,40	0,9	132	85	0.00161647	0.95222	0.392,0.434	1.0,0.741	-0.458
72068	ENSG00000142453	CARM1	chr19	+	11032050	11032119	11031725	11031803	11032290	11033448	72068	9225	8122	11238	21349	110	71	0.00162412	0.95222	0.421,0.543	0.253,0.306	0.203
31067	ENSG00000139436	GIT2	chr12	-	110383064	110383154	110376969	110377052	110385060	110385309	31067	1,14	3,26	1,77	0,31	157	76	0.00163127	0.95222	0.139,0.207	1.0,0.546	-0.6
846	ENSG00000162769	FLVCR1	chr1	+	213037066	213037211	213032257	213032532	213046019	213046160	846	8104	5,54	3111	0,9	216	85	0.00167002	0.95533	0.386,0.431	1.0,0.829	-0.506
27101	ENSG00000006114	SYNRG	chr17	-	35939227	35939530	35937544	35937711	35944755	35944867	27101	16195	4,27	32368	0,12	374	85	0.00167329	0.95533	0.476,0.621	1.0,0.875	-0.389
70388	ENSG00000083807	SLC27A5	chr19	-	59010151	59010282	59009703	59010058	59010489	59010587	70388	171811	4,27	491120	9121	202	85	0.00168939	0.95533	0.947,0.927	0.696,0.796	0.191
56225	ENSG00000111445	RFC5	chr12	+	118455494	118455858	118454526	118454697	118456876	118456941	56225	21388	5331	9195	12600	408	58	0.00171073	0.957426	0.374,0.143	0.096,0.044	0.189
28541	ENSG00000104164	PLDN	chr15	+	45884332	45884474	45879416	45879723	45897625	45897712	28541	48664	14375	26567	2133	208	80	0.00173716	0.958998	0.569,0.405	0.833,0.621	-0.24
65072	ENSG00000145216	FIP1L1	chr4	+	54280781	54280889	54265896	54266006	54292038	54292132	65072	21338	27253	41459	6179	179	85	0.00175369	0.958998	0.27,0.388	0.764,0.549	-0.328
46975	ENSG00000111206	FOXM1	chr12	-	2974520	2974565	2973848	2973918	2975558	2975687	46975	33191	14261	30330	3,93	54	63	0.00176653	0.958998	0.733,0.461	0.921,0.805	-0.266
35943	ENSG00000156787	WDR67	chr8	+	124132294	124132428	124121713	124121860	124138295	124138429	35943	7,73	2,13	18,66	0,0	205	85	0.00180911	0.96974	0.592,0.7	1.0,1.0	-0.354
70176	ENSG00000079459	FDFT1	chr8	+	11660599	11660734	11660276	11660440	11660830	11661341	70176	9476	0,45	3108	0,36	206	85	0.00183643	0.96974	1.0,0.814	1.0,0.553	0.131
39091	ENSG00000086289	EPDR1	chr7	+	37988441	37988650	37960162	37960810	37989801	37991543	39091	11223	2,52	30394	0,28	280	85	0.00183991	0.96974	0.625,0.566	1.0,0.81	-0.31
48867	ENSG00000167491	GATAD2A	chr19	+	19612777	19612852	19611926	19612225	19613139	19613335	48867	41605	10,97	401129	1,48	136	85	0.00189038	0.986762	0.719,0.796	0.962,0.936	-0.192
7370	ENSG00000154889	MPPE1	chr18	-	11884877	11885042	11884051	11884626	11885674	11885815	7370	6123	7135	6253	0,57	236	85	0.00191833	0.987639	0.236,0.247	1.0,0.615	-0.566
6253	ENSG00000114062	UBE3A	chr15	-	25654234	25654354	25650607	25650649	25683635	25684128	6253	2,45	2,95	3,89	0,47	141	35	0.00192845	0.987639	0.199,0.105	1.0,0.32	-0.508
68448	ENSG00000079156	OSBPL6	chr2	+	179204398	179204491	179203717	179203821	179213950	179214116	68448	1,8	4,18	4,14	0,4	170	85	0.00195273	0.99073	0.111,0.182	1.0,0.636	-0.672
41074	ENSG00000122483	CCDC18	chr1	+	93671066	93671188	93667448	93667545	93672663	93672955	41074	8,60	9,30	8126	2,17	193	85	0.00198071	0.995618	0.281,0.468	0.638,0.765	-0.327
62887	ENSG00000159322	ADPGK	chr15	-	73047896	73047995	73043709	73045233	73052747	73052868	62887	4115	2,41	12184	0,19	170	85	0.00201331	1	0.5,0.584	1.0,0.829	-0.372
24244	ENSG00000121931	LRIF1	chr1	-	111493909	111495437	111492472	111492745	111506242	111506701	24244	94660	9,96	157794	7,33	1599	85	0.00204077	1	0.357,0.268	0.544,0.561	-0.24
17230	ENSG00000112983	BRD8	chr5	-	137495243	137495288	137492603	137492956	137495757	137495862	17230	16221	8141	4149	4224	76	85	0.00205023	1	0.691,0.637	0.528,0.427	0.186
38449	ENSG00000107758	PPP3CB	chr10	-	75199629	75199659	75197955	75198178	75204482	75204580	38449	7,92	0,9	0,86	2,32	46	85	0.00210516	1	1.0,0.95	0.0,0.832	0.559
34598	ENSG00000058673	ZC3H11A	chr1	+	203765578	203765729	203764781	203764903	203770702	203770756	34598	22194	3,34	12297	0,11	184	47	0.00210852	1	0.652,0.593	1.0,0.873	-0.314
32263	ENSG00000112078	KCTD20	chr6	+	36447367	36447488	36410543	36410888	36449338	36449536	32263	17260	6153	18286	2,68	192	85	0.0021231	1	0.556,0.429	0.799,0.651	-0.233
62894	ENSG00000159322	ADPGK	chr15	-	73048591	73048788	73043709	73045233	73052747	73052868	62894	12216	2,41	17389	0,19	268	85	0.00213475	1	0.656,0.626	1.0,0.867	-0.293
33396	ENSG00000147050	KDM6A	chrX	+	44921891	44921993	44920568	44920664	44922666	44923062	33396	4,80	2,45	2,41	5,72	173	85	0.00216151	1	0.496,0.466	0.164,0.219	0.29
8039	ENSG00000129559	NEDD8,NEDD8-MDP1	chr14	-	24687264	24687421	24686062	24686429	24701455	24701509	8039	2,61	0,10	5,97	0,0	190	47	0.00217746	1	1.0,0.601	1.0,1.0	-0.2
34289	ENSG00000129116	PALLD	chr4	+	169798873	169799545	169753191	169753322	169812072	169812208	34289	431403	4,40	10943	3111	743	85	0.0021949	1	0.552,0.801	0.276,0.493	0.292
39221	ENSG00000196776	CD47	chr3	-	107770785	107770817	107762145	107766139	107776323	107776416	39221	100453	36230	43362	63272	50	85	0.00222353	1	0.825,0.77	0.537,0.693	0.183
621	ENSG00000133612	AGAP3	chr7	+	150817606	150817832	150817073	150817232	150819811	150819965	621	2,16	1,17	6,68	1,10	297	85	0.00224797	1	0.364,0.212	0.632,0.661	-0.359
8136	ENSG00000103222	ABCC1	chr16	+	16108347	16108485	16101672	16101849	16126965	16127027	8136	1,58	0,17	6,74	0,2	179	55	0.00228505	1	1.0,0.512	1.0,0.919	-0.204
3365	ENSG00000069943	PIGB	chr15	+	55642896	55643110	55611132	55611611	55646995	55647176	3365	5,23	0,31	11,43	0,8	285	85	0.00229091	1	1.0,0.181	1.0,0.616	-0.218
44524	ENSG00000076770	MBNL3	chrX	-	131515386	131515460	131513335	131513705	131516205	131516300	44524	1,8	8,29	3,27	0,25	134	85	0.00231821	1	0.073,0.149	1.0,0.407	-0.593
21427	ENSG00000006125	AP2B1	chr17	+	33997875	33997917	33984617	33984810	33998772	33998919	21427	7282	17331	6423	6217	70	85	0.0023546	1	0.333,0.508	0.548,0.703	-0.205
6977	ENSG00000224078	none_found	chr15	+	25298412	25298510	25296235	25296383	25298974	25299114	6977	1,4	9,34	4,56	6,74	170	85	0.00237189	1	0.053,0.056	0.25,0.275	-0.208
54196	ENSG00000143429	none_found	chr2	-	91842945	91843023	91824708	91825059	91843393	91843528	54196	5,44	6,37	1,77	0,13	142	85	0.00238073	1	0.333,0.416	1.0,0.78	-0.516
62023	ENSG00000155329	ZCCHC10	chr5	-	132335823	132335865	132332676	132334542	132342450	132342612	62023	4,76	2,38	2,53	7,62	70	85	0.00249051	1	0.708,0.708	0.258,0.509	0.324
13210	ENSG00000214357	NEURL1B	chr5	+	172110421	172111141	172068268	172068440	172113173	172113299	13210	17622	0,40	8491	1109	791	85	0.00254931	1	1.0,0.626	0.462,0.326	0.419
19737	ENSG00000233024	none_found	chr16	-	18453949	18454010	18453804	18453840	18455026	18455134	19737	2,67	0,0	0,79	2,70	54	29	0.00255169	1	1.0,1.0	0.0,0.377	0.812
55412	ENSG00000147443	DOK2	chr8	-	21769411	21769499	21766383	21767442	21771049	21771371	55412	0,20	1,26	1,38	0,3	162	85	0.00255285	1	0.0,0.288	1.0,0.869	-0.791
27419	ENSG00000168781	PPIP5K1	chr15	-	43857064	43857190	43850992	43851130	43860660	43860751	27419	6,90	1,21	8172	0,7	196	84	0.00257111	1	0.72,0.647	1.0,0.913	-0.273
7221	ENSG00000249859	none_found	chr8	+	128951753	128951922	128902873	128903244	129001407	129001537	7221	3,22	0,7	6,58	0,0	240	85	0.00258621	1	1.0,0.527	1.0,1.0	-0.236
24307	ENSG00000139350	NEDD1	chr12	+	97311398	97311515	97301381	97301634	97313762	97313896	24307	26112	5,31	27,96	1,5	188	85	0.00260336	1	0.702,0.62	0.924,0.897	-0.25
9365	ENSG00000108055	SMC3	chr10	+	112333464	112333503	112328695	112328771	112335093	112335161	9365	3,18	0,4	1,6	1,25	24	45	0.00273013	1	1.0,0.894	0.652,0.31	0.466
34448	ENSG00000186635	ARAP1	chr11	-	72403797	72403830	72399499	72399582	72404369	72404515	34448	2,82	5,76	2,80	2,30	43	76	0.00273159	1	0.414,0.656	0.639,0.825	-0.197
50942	ENSG00000114867	EIF4G1	chr3	+	184033919	184034006	184032406	184032462	184035108	184035285	50942	12276	6173	23592	3166	124	49	0.00273499	1	0.441,0.387	0.752,0.585	-0.254
60616	ENSG00000033867	SLC4A7	chr3	-	27477878	27478039	27475406	27475595	27478878	27479017	60616	64660	0,0	25432	4,26	232	85	0.00274673	1	1.0,1.0	0.696,0.859	0.223
47217	ENSG00000060138	CSDA	chr12	-	10862506	10862713	10856621	10856747	10865809	10865932	47217	991496	14365	181517	19674	278	85	0.00279811	1	0.684,0.556	0.225,0.408	0.304
9360	ENSG00000168061	SAC3D1	chr11	+	64810496	64810636	64808412	64808578	64811696	64812300	9360	4,41	0,8	1,37	0,38	211	85	0.00280648	1	1.0,0.674	1.0,0.282	0.196
18963	ENSG00000078674	PCM1	chr8	+	17840741	17840798	17838099	17838264	17842955	17843128	18963	4,37	9,66	7,55	7,34	100	85	0.00283611	1	0.274,0.323	0.459,0.579	-0.221
21747	ENSG00000197724	PHF2	chr9	+	96421792	96421882	96420426	96420518	96422473	96422842	21747	12158	5,18	11181	0,0	166	85	0.00284082	1	0.551,0.818	1.0,1.0	-0.316
58388	ENSG00000129696	TTI2	chr8	-	33364746	33364839	33361265	33361453	33367263	33367450	58388	13220	6,56	13252	2,18	170	85	0.00285452	1	0.52,0.663	0.765,0.875	-0.229
30845	ENSG00000183495	EP400	chr12	+	132466033	132466141	132464238	132464338	132466637	132467023	30845	5133	3,73	6298	0,58	179	85	0.00292282	1	0.442,0.464	1.0,0.709	-0.402
28165	ENSG00000167615	LENG8	chr19	+	54962466	54962559	54960401	54960484	54963269	54963444	28165	915007	0,122	296368	2704	161	76	0.00293436	1	1.0,0.951	0.873,0.81	0.134
35112	ENSG00000138303	ASCC1	chr10	-	73862607	73862725	73856279	73857208	73887839	73887925	35112	0,4	13,62	2,25	7,47	183	79	0.00293874	1	0.0,0.027	0.11,0.187	-0.135
26131	ENSG00000092020	PPP2R3C	chr14	-	35585815	35585943	35579730	35579835	35591107	35591307	26131	3,40	6,63	9,51	2,25	199	85	0.00295842	1	0.176,0.213	0.658,0.466	-0.368
5208	ENSG00000111711	GOLT1B	chr12	+	21661316	21661495	21654726	21654882	21665228	21665310	5208	19,84	7135	29,71	3,37	240	75	0.00304813	1	0.459,0.163	0.751,0.375	-0.252
24713	ENSG00000179134	SAMD4B	chr19	+	39844645	39844706	39833107	39833216	39847328	39847729	24713	6128	5,80	7240	2,37	108	85	0.00306773	1	0.486,0.557	0.734,0.836	-0.263
66304	ENSG00000157193	LRP8	chr1	-	53723680	53723746	53722914	53723136	53723990	53724143	66304	0,16	14727	2108	6393	118	85	0.00310662	1	0.0,0.016	0.194,0.165	-0.172
20253	ENSG00000129810	SGOL1	chr3	-	20216496	20216547	20212534	20212724	20218092	20218151	20253	20,56	3,45	18,44	0,9	55	52	0.00317225	1	0.863,0.541	1.0,0.822	-0.209
23937	ENSG00000156504	FAM122B	chrX	-	133906172	133906313	133905125	133905384	133915850	133915947	23937	17290	6137	10178	8196	212	85	0.00320748	1	0.532,0.459	0.334,0.267	0.195
38142	ENSG00000214413	BBIP1	chr10	-	112667437	112667594	112661295	112661370	112677878	112677971	38142	0,8	10128	6,23	3,62	211	68	0.00326076	1	0.0,0.02	0.392,0.107	-0.24
13561	ENSG00000117748	RPA2	chr1	-	28224143	28224218	28223515	28223632	28233438	28233552	13561	49435	1,16	23507	7,68	136	85	0.00329598	1	0.968,0.944	0.673,0.823	0.208
25899	ENSG00000081237	PTPRC	chr1	+	198663146	198663269	198661475	198661502	198665840	198666038	25899	1,54	3,49	0,50	46240	129	20	0.00331532	1	0.049,0.146	0.0,0.031	0.082
38139	ENSG00000214413	BBIP1	chr10	-	112677878	112677971	112661295	112661370	112678878	112679032	38139	15204	1,7	8105	3,20	153	68	0.00334749	1	0.87,0.928	0.542,0.7	0.278
4884	ENSG00000103194	USP10	chr16	+	84808765	84808831	84801798	84801964	84812500	84813525	4884	12209	5,39	16378	0,16	118	85	0.00344443	1	0.634,0.794	1.0,0.944	-0.258
16756	ENSG00000198218	QRICH1	chr3	-	49129829	49129889	49114141	49114471	49131344	49131495	16756	1,26	14301	6,55	4219	106	85	0.00347169	1	0.054,0.065	0.546,0.168	-0.298
37935	ENSG00000060237	WNK1	chr12	+	977031	978270	971248	971436	987377	987527	37935	25398	10126	42443	2,46	1310	85	0.00350171	1	0.14,0.17	0.577,0.385	-0.326
6637	ENSG00000134759	ELP2	chr18	+	33718757	33718835	33718232	33718389	33721099	33721164	6637	12123	0,5	8,71	1,18	115	58	0.00350649	1	1.0,0.925	0.801,0.665	0.229
25860	ENSG00000143494	VASH2	chr1	+	213124680	213125160	213123976	213124082	213134507	213134596	25860	12588	2,35	1304	2,57	548	82	0.00353508	1	0.473,0.715	0.07,0.444	0.337
39677	ENSG00000144485	HES6	chr2	-	239148301	239148388	239148127	239148209	239148465	239148612	39677	361029	0,8	81093	1105	150	75	0.00353802	1	1.0,0.985	0.8,0.839	0.173
755	ENSG00000204576	PRR3	chr6	+	30529104	30529285	30525926	30525989	30529610	30529901	755	16118	2,22	6,95	6,57	223	56	0.00359843	1	0.668,0.574	0.201,0.295	0.373
32048	ENSG00000154803	FLCN	chr17	-	17125814	17125975	17122332	17122523	17129489	17129636	32048	1,51	0,11	1,70	0,0	232	85	0.00360362	1	1.0,0.629	1.0,1.0	-0.186
26732	ENSG00000172081	MOB3A	chr19	-	2085173	2085327	2078138	2078678	2096224	2096269	26732	23286	5,34	19605	0,18	178	38	0.00369341	1	0.495,0.642	1.0,0.878	-0.371
5182	ENSG00000006194	ZNF263	chr16	+	3335058	3335239	3333447	3334205	3339392	3341460	5182	4178	1165	5236	0,84	252	85	0.00369408	1	0.574,0.267	1.0,0.487	-0.323
7376	ENSG00000154889	MPPE1	chr18	-	11906201	11906308	11896982	11897355	11908199	11908641	7376	17169	4,77	10146	0,8	178	85	0.00370888	1	0.67,0.512	1.0,0.897	-0.358
66303	ENSG00000157193	LRP8	chr1	-	53715051	53715228	53711216	53712728	53716361	53716534	66303	13306	6319	19367	4139	248	85	0.00373173	1	0.426,0.247	0.619,0.475	-0.21
47029	ENSG00000069424	KCNAB2	chr1	+	6101890	6101932	6100576	6100705	6132814	6132858	47029	4112	19703	7204	10547	35	37	0.00376158	1	0.182,0.144	0.425,0.283	-0.191
32268	ENSG00000112078	KCTD20	chr6	+	36442565	36442839	36410543	36410888	36449338	36449536	32268	32209	6153	48231	2,68	345	85	0.0037652	1	0.568,0.252	0.855,0.456	-0.246
11176	ENSG00000160094	ZNF362	chr1	+	33736087	33736213	33722173	33722255	33741700	33741764	11176	1,23	3,69	9,64	0,58	159	47	0.00383806	1	0.09,0.09	1.0,0.246	-0.533
13138	ENSG00000130731	C16orf13	chr16	-	684888	684956	684718	684797	686093	686347	13138	95236	5,13	47271	8,56	109	72	0.00387746	1	0.926,0.923	0.795,0.762	0.146
45266	ENSG00000100354	TNRC6B	chr22	+	40666125	40666284	40657835	40658177	40669428	40669604	45266	3,41	1,30	4,71	0,12	230	85	0.00392069	1	0.526,0.336	1.0,0.686	-0.412
59516	ENSG00000091039	OSBPL8	chr12	-	76853638	76853675	76844631	76844768	76881289	76881398	59516	6,36	3,19	2,23	6,31	60	85	0.00403669	1	0.739,0.729	0.321,0.512	0.318
37924	ENSG00000060237	WNK1	chr12	+	980430	980514	971339	971436	987377	987527	37924	17125	10126	8150	2,46	154	85	0.00410857	1	0.484,0.354	0.688,0.643	-0.247
47484	ENSG00000181396	C17orf101	chr17	-	80352206	80352419	80347085	80350410	80356071	80356195	47484	33280	49167	32424	12134	284	85	0.00422832	1	0.168,0.334	0.444,0.486	-0.214
20999	ENSG00000123965	none_found	chr7	+	74312515	74312628	74312262	74312349	74313767	74313951	20999	29106	11,64	29157	5,18	179	80	0.00430416	1	0.541,0.425	0.722,0.796	-0.276
45090	ENSG00000101187	SLCO4A1	chr20	+	61296285	61296440	61273838	61273905	61299096	61299893	45090	1,42	1,66	2,77	0,34	201	60	0.00433976	1	0.23,0.16	1.0,0.403	-0.506
72296	ENSG00000136754	ABI1	chr10	-	27047990	27048164	27040526	27040712	27054146	27054247	72296	31744	8145	54879	4,70	245	85	0.00439366	1	0.573,0.64	0.824,0.813	-0.212
1312	ENSG00000101294	HM13	chr20	+	30155880	30156083	30154012	30154098	30156922	30157370	1312	21147	70327	20237	17249	268	79	0.00447684	1	0.081,0.117	0.257,0.219	-0.139
70651	ENSG00000181019	NQO1	chr16	-	69748866	69748980	69746930	69747032	69752025	69752156	70651	2,80	1,17	2,93	0,2	185	85	0.00449795	1	0.479,0.684	1.0,0.955	-0.396
54669	ENSG00000204713	TRIM27	chr6	-	28876749	28876865	28872330	28872442	28887788	28888019	54669	1,24	0,8	4,38	0,0	187	85	0.00455281	1	1.0,0.577	1.0,1.0	-0.212
69535	ENSG00000064995	TAF11	chr6	-	34848065	34848153	34845749	34846497	34850708	34850857	69535	10,58	2,26	16,70	0,8	162	85	0.00457011	1	0.724,0.539	1.0,0.821	-0.279
46997	ENSG00000090316	MAEA	chr4	+	1321414	1321491	1309184	1309388	1326544	1326642	46997	5143	2,98	3294	0,60	140	85	0.00469565	1	0.603,0.47	1.0,0.748	-0.338
17288	ENSG00000170889	RPS9	chr19	+	54710420	54710592	54705354	54705477	54711265	54711390	17288	1111012	26169	23382	16126	243	85	0.0047335	1	0.599,0.677	0.335,0.515	0.213
65806	ENSG00000109674	NEIL3	chr4	+	178272533	178272703	178257261	178257475	178274461	178274882	65806	48645	7,67	48687	3,14	241	85	0.00473814	1	0.707,0.772	0.849,0.945	-0.157
55768	ENSG00000116731	PRDM2	chr1	+	14104912	14109326	14099572	14099683	14142921	14143065	55768	8072951	5,65	10864571	0,41	4485	85	0.00478393	1	0.754,0.462	1.0,0.679	-0.232
45921	ENSG00000103485	QPRT	chr16	+	29690440	29690531	29674599	29674637	29705984	29706465	45921	311303	6288	191182	0,84	114	31	0.00481803	1	0.584,0.552	1.0,0.793	-0.329
32385	ENSG00000134717	BTF3L4	chr1	+	52549011	52549213	52530496	52530610	52551783	52552282	32385	80541	6100	61592	1,39	273	85	0.00484281	1	0.806,0.627	0.95,0.825	-0.171
8629	ENSG00000133627	ACTR3B	chr7	+	152480271	152480327	152456833	152457011	152497615	152497740	8629	1,45	1,37	2110	0,33	98	85	0.00493082	1	0.464,0.513	1.0,0.743	-0.383
73336	ENSG00000166199	ALKBH3	chr11	+	43913590	43913679	43911274	43911378	43923065	43923275	73336	20203	3,50	29310	2,22	164	85	0.0049642	1	0.776,0.678	0.883,0.88	-0.154
46825	ENSG00000110497	AMBRA1	chr11	-	46534276	46534363	46515673	46515754	46563494	46564948	46825	1,29	1,19	4,41	0,5	149	74	0.00499109	1	0.332,0.431	1.0,0.803	-0.52
66384	ENSG00000163281	GNPDA2	chr4	-	44724100	44724259	44712969	44713154	44728490	44728562	66384	8442	2,66	9739	0,27	210	65	0.00520935	1	0.553,0.675	1.0,0.894	-0.333
13209	ENSG00000214357	NEURL1B	chr5	+	172096787	172097333	172068268	172068440	172113173	172113299	13209	22466	0,40	8404	1109	617	85	0.00522515	1	1.0,0.616	0.524,0.338	0.377
40595	ENSG00000151012	SLC7A11	chr4	-	139103450	139103547	139101794	139101944	139104355	139104459	40595	3,80	0,29	8,79	0,5	170	85	0.00524046	1	1.0,0.58	1.0,0.888	-0.154
36954	ENSG00000137075	RNF38	chr9	-	36390463	36390613	36375930	36376124	36400550	36400920	36954	2,62	4229	2108	2114	221	85	0.00529332	1	0.161,0.094	0.278,0.267	-0.145
6933	ENSG00000101974	ATP11C	chrX	-	138813809	138813914	138808507	138811121	138820074	138820228	6933	4,53	11,42	0,24	11,58	176	85	0.00538942	1	0.149,0.379	0.0,0.167	0.181
55206	ENSG00000003756	RBM5	chr3	+	50148111	50148203	50147035	50147121	50150815	50150977	55206	2333	1,60	4262	0,9	164	79	0.00541163	1	0.491,0.728	1.0,0.933	-0.357
56272	ENSG00000111790	FGFR1OP2	chr12	+	27113447	27113561	27110533	27110676	27116274	27116388	56272	18,91	36468	19239	21323	185	85	0.00543439	1	0.187,0.082	0.294,0.254	-0.14
69217	ENSG00000001631	KRIT1	chr7	-	91874215	91874485	91871347	91871451	91874740	91874909	69217	12222	6,34	26231	0,14	341	85	0.00544978	1	0.333,0.619	1.0,0.804	-0.426
62888	ENSG00000159322	ADPGK	chr15	-	73047896	73047995	73043709	73045233	73075799	73076126	62888	4,81	0,13	9158	0,2	170	85	0.00566423	1	1.0,0.757	1.0,0.975	-0.109
40051	ENSG00000176261	ZBTB8OS	chr1	-	33100302	33100393	33099551	33099673	33116033	33116126	40051	21288	0,30	10332	2,91	168	85	0.00566438	1	1.0,0.829	0.717,0.649	0.231
6072	ENSG00000187239	FNBP1	chr9	-	132686122	132686275	132671168	132671278	132687238	132687436	6072	59430	143495	24129	98383	224	85	0.00566799	1	0.135,0.248	0.085,0.113	0.093
45760	ENSG00000151292	CSNK1G3	chr5	+	122941032	122941056	122940417	122940524	122950035	122950254	45760	0,15	4,21	0,5	11,31	34	85	0.00568635	1	0.0,0.641	0.0,0.287	0.177
308	ENSG00000118762	PKD2	chr4	+	88967793	88968022	88964384	88964609	88973142	88973310	308	7,66	3,17	10,92	0,4	300	85	0.00572766	1	0.398,0.524	1.0,0.867	-0.473
62021	ENSG00000186591	UBE2H	chr7	-	129498741	129498781	129479064	129479175	129519407	129519482	62021	1,5	1,14	1,14	0,6	49	68	0.00572989	1	0.581,0.331	1.0,0.764	-0.426
15165	ENSG00000167397	VKORC1	chr16	-	31104632	31104803	31102162	31102663	31105877	31106081	15165	461365	36630	411753	14433	242	85	0.00574078	1	0.31,0.432	0.507,0.587	-0.176
15287	ENSG00000136856	SLC2A8	chr9	+	130164835	130165032	130162185	130162285	130165938	130166082	15287	11,98	1,15	1,95	3,45	268	85	0.00574121	1	0.777,0.674	0.096,0.401	0.477
55602	ENSG00000039319	ZFYVE16	chr5	+	79723310	79723364	79703844	79703972	79729927	79730036	55602	0,0	2,31	2,10	1,31	94	85	0.00575984	1	0.0,0.0	0.644,0.226	-0.435
32021	ENSG00000168137	SETD5	chr3	+	9475053	9475246	9470506	9470693	9475528	9475634	32021	5148	7,95	6229	3,34	264	85	0.00595896	1	0.187,0.334	0.392,0.684	-0.278
28846	ENSG00000072818	ACAP1	chr17	+	7240630	7240688	7239847	7240106	7245266	7245386	28846	53642	7,87	13536	6163	102	85	0.00598697	1	0.863,0.86	0.644,0.733	0.173
30250	ENSG00000156170	C8orf38	chr8	+	96046235	96046350	96044222	96044326	96047681	96047804	30250	8,14	0,10	9,62	0,5	186	85	0.00605279	1	1.0,0.39	1.0,0.85	-0.23
781	ENSG00000165304	MELK	chr9	+	36594624	36594768	36589532	36589649	36599390	36599483	781	10197	6153	18240	5,82	215	85	0.00606008	1	0.397,0.337	0.587,0.536	-0.195
58463	ENSG00000152348	ATG10	chr5	+	81548380	81548478	81474308	81474406	81571963	81572116	58463	3,43	0,19	7,71	0,6	170	85	0.00607104	1	1.0,0.531	1.0,0.855	-0.162
48328	ENSG00000101654	RNMT	chr18	+	13730625	13730754	13726659	13726728	13731474	13731933	48328	7,70	9,56	13119	4,36	177	62	0.00614191	1	0.214,0.305	0.532,0.537	-0.275
27739	ENSG00000144468	RHBDD1	chr2	+	227702788	227702870	227702263	227702486	227729319	227729781	27739	2,1	0,11	1,18	0,8	150	85	0.00615732	1	1.0,0.049	1.0,0.56	-0.256
59902	ENSG00000166526	ZNF3	chr7	-	99677158	99677195	99674925	99675056	99679257	99679332	59902	8,87	0,11	4,71	4,28	43	68	0.00619495	1	1.0,0.926	0.613,0.8	0.257
15740	ENSG00000108799	EZH1	chr17	-	40876322	40876442	40874812	40874933	40879652	40879781	15740	10102	3,27	11152	0,11	191	85	0.00619712	1	0.597,0.627	1.0,0.86	-0.318
72845	ENSG00000169905	TOR1AIP2	chr1	-	179846373	179846508	179828164	179834989	179846827	179846907	72845	27347	5,64	40358	3,21	194	73	0.00621202	1	0.67,0.671	0.834,0.865	-0.179
43886	ENSG00000083520	DIS3	chr13	-	73355426	73355494	73354983	73355141	73355742	73356063	43886	2,93	6112	0,82	6227	122	85	0.00631812	1	0.188,0.366	0.0,0.201	0.177
60036	ENSG00000215114	UBXN2B	chr8	+	59358465	59358627	59329408	59329512	59359947	59360243	60036	10,61	1,14	23,71	0,2	233	85	0.00641021	1	0.785,0.614	1.0,0.928	-0.264
42650	ENSG00000119844	AFTPH	chr2	+	64808323	64808407	64806619	64806680	64812555	64812679	42650	1,12	4,52	2,35	2,35	123	54	0.00641204	1	0.099,0.092	0.305,0.305	-0.21
19189	ENSG00000148187	MRRF	chr9	+	125048317	125048445	125047447	125047566	125054027	125054119	19189	4,53	10,15	0,51	4,54	199	85	0.00641487	1	0.146,0.601	0.0,0.287	0.23
37178	ENSG00000148396	SEC16A	chr9	-	139339503	139339563	139338274	139338352	139340096	139340171	37178	9,51	2,29	1,31	5,40	75	54	0.00644636	1	0.764,0.559	0.126,0.358	0.42
28284	ENSG00000160185	UBASH3A	chr21	+	43833518	43833632	43833132	43833331	43838509	43838718	28284	0,51	2,19	1,42	0,2	185	85	0.00650391	1	0.0,0.552	1.0,0.906	-0.677
18244	ENSG00000187764	SEMA4D	chr9	-	92032970	92033033	92020265	92020614	92070802	92070868	18244	1,53	2,72	4,52	0,27	86	59	0.00653366	1	0.255,0.336	1.0,0.569	-0.489
27654	ENSG00000138646	HERC5	chr4	+	89391764	89391824	89390307	89390411	89393559	89393653	27654	15,84	0,0	11,55	4,8	106	85	0.00674429	1	1.0,1.0	0.688,0.846	0.233
42874	ENSG00000175265	none_found	chr15	-	34845095	34845292	34843338	34843477	34845945	34846157	42874	14325	1,25	15312	0,1	268	85	0.00675725	1	0.816,0.805	1.0,0.99	-0.185
68017	ENSG00000182165	none_found	chr7	-	86974358	86974549	86970838	86971000	86974620	86974831	68017	43189	21,83	20244	1,49	262	85	0.0067607	1	0.399,0.425	0.866,0.618	-0.33
35133	ENSG00000145545	SRD5A1	chr5	+	6644920	6645422	6633539	6633982	6651954	6652121	35133	0,16	5120	8,72	2104	573	85	0.00679035	1	0.0,0.019	0.372,0.093	-0.223
45265	ENSG00000100354	TNRC6B	chr22	+	40666125	40666284	40660691	40663040	40669428	40669604	45265	11,61	6,42	7115	1,26	230	85	0.00679399	1	0.404,0.349	0.721,0.62	-0.294
12282	ENSG00000125844	RRBP1	chr20	-	17660643	17660720	17639240	17641173	17662672	17662878	12282	0,12	1195	2,64	0,108	140	85	0.00682286	1	0.0,0.036	1.0,0.265	-0.615
70954	ENSG00000156469	MTERFD1	chr8	-	97270584	97270928	97269189	97269342	97273728	97273817	70954	38638	3,86	23566	0,12	412	82	0.00691126	1	0.716,0.596	1.0,0.904	-0.296
47221	ENSG00000110066	SUV420H1	chr11	-	67946936	67947004	67942484	67942650	67947598	67947667	47221	0,3	11,20	2,15	5,16	99	62	0.00698095	1	0.0,0.086	0.2,0.37	-0.242
31507	ENSG00000168876	ANKRD49	chr11	+	94231067	94231130	94229769	94230117	94231236	94231380	31507	4,55	0,43	5,19	7,39	112	85	0.00699096	1	1.0,0.493	0.352,0.27	0.435
72277	ENSG00000179950	PUF60	chr8	-	144902835	144902886	144900542	144900704	144903766	144903856	72277	4169	11345	3351	4382	86	83	0.00699766	1	0.26,0.321	0.42,0.47	-0.154
8554	ENSG00000108423	TUBD1	chr17	-	57951899	57952064	57943969	57944110	57955463	57955695	8554	3,22	2,12	9,69	0,8	236	85	0.00701396	1	0.351,0.398	1.0,0.756	-0.504
58871	ENSG00000125970	RALY	chr20	+	32664833	32665051	32664507	32664621	32666310	32666359	58871	3484738	0,2	814771	4,96	246	42	0.00703026	1	1.0,0.998	0.776,0.895	0.163
14199	ENSG00000078140	UBE2K	chr4	+	39739039	39739133	39699663	39700010	39776453	39776553	14199	32865	7219	131375	0,58	170	85	0.0071902	1	0.696,0.664	1.0,0.922	-0.281
23247	ENSG00000148399	WDR85	chr9	-	140470160	140470344	140469203	140469295	140470531	140470619	23247	7161	0,18	3,75	1,29	251	81	0.00720305	1	1.0,0.743	0.492,0.455	0.398
31107	ENSG00000108587	GOSR1	chr17	+	28817143	28817235	28811680	28811788	28819696	28819771	31107	10137	4,16	20200	1,3	153	68	0.00723849	1	0.526,0.792	0.899,0.967	-0.274
827	ENSG00000189308	LIN54	chr4	-	83900035	83900159	83867410	83867627	83905313	83906029	827	8,91	4,17	23,90	0,5	195	85	0.00728795	1	0.466,0.7	1.0,0.887	-0.361
30945	ENSG00000137944	CCBL2	chr1	-	89430238	89430395	89427741	89427828	89430511	89430661	30945	0,12	19,78	2,20	4,33	223	80	0.00741428	1	0.0,0.052	0.152,0.179	-0.139
57710	ENSG00000123179	EBPL	chr13	-	50243912	50243982	50234858	50235344	50265389	50265599	57710	4437	3421	8602	2269	126	85	0.00743515	1	0.474,0.412	0.73,0.602	-0.223
27840	ENSG00000118961	C2orf43	chr2	-	20939730	20939965	20901329	20901412	20974569	20974739	27840	11256	5,29	23204	0,7	297	76	0.00747106	1	0.36,0.693	1.0,0.882	-0.415
66968	ENSG00000078403	MLLT10	chr10	+	21977419	21977467	21971153	21971186	22002700	22002879	66968	0,10	1,28	1,15	1,7	41	26	0.00751154	1	0.0,0.185	0.388,0.576	-0.389
14884	ENSG00000257076	none_found	chr12	-	123712009	123712119	123707584	123707674	123714807	123715069	14884	38,98	4,25	16,51	8,31	179	83	0.00763853	1	0.815,0.645	0.481,0.433	0.273
66600	ENSG00000139631	CSAD	chr12	-	53566129	53566220	53564206	53564286	53567128	53567260	66600	0,1	1,10	1,7	0,2	156	73	0.00771708	1	0.0,0.045	1.0,0.621	-0.788
20409	ENSG00000070814	TCOF1	chr5	+	149762624	149762735	149759094	149759295	149767464	149767651	20409	4,71	16286	5193	2339	182	85	0.00780361	1	0.105,0.104	0.539,0.21	-0.27
3907	ENSG00000112851	ERBB2IP	chr5	+	65367996	65368119	65364704	65364848	65370851	65371058	3907	2,11	3,23	8,29	2,14	194	85	0.00786768	1	0.226,0.173	0.637,0.476	-0.357
1112	ENSG00000121022	COPS5	chr8	-	67959919	67960094	67958046	67958195	67963464	67963576	1112	0,36	63318	4,71	38164	246	85	0.00788773	1	0.0,0.038	0.035,0.13	-0.064
2112	ENSG00000198771	RCSD1	chr1	+	167602885	167603043	167599502	167599666	167610627	167610978	2112	6,40	0,0	4,70	0,19	229	85	0.00791371	1	1.0,1.0	1.0,0.578	0.211
25659	ENSG00000075292	ZNF638	chr2	+	71655660	71655781	71654479	71654544	71658456	71658558	25659	12213	0,3	8231	2,25	165	58	0.00795307	1	1.0,0.961	0.584,0.765	0.306
44712	ENSG00000122741	DCAF10	chr9	+	37842085	37842283	37819284	37819398	37854776	37854979	44712	19169	2,17	34274	1,4	269	85	0.0081163	1	0.75,0.759	0.915,0.956	-0.181
65555	ENSG00000125726	CD70	chr19	-	6590113	6590147	6585866	6586416	6590851	6591163	65555	0,49	3,11	4,74	0,3	54	85	0.00813845	1	0.0,0.875	1.0,0.975	-0.55
40043	ENSG00000172239	PAIP1	chr5	-	43533839	43533894	43529887	43529981	43534954	43535072	40043	21134	6,17	19101	0,0	96	85	0.00820761	1	0.756,0.875	1.0,1.0	-0.185
64498	ENSG00000110321	EIF4G2	chr11	-	10829823	10830055	10828801	10828928	10830251	10830487	64498	341173	35850	12896	621021	303	85	0.00824137	1	0.214,0.279	0.051,0.198	0.122
27196	ENSG00000164008	C1orf50	chr1	+	43233179	43233295	43232939	43233061	43239233	43239320	27196	6400	3,34	2243	5,57	182	80	0.00827806	1	0.468,0.838	0.15,0.652	0.252
3767	ENSG00000109534	GAR1	chr4	+	110737308	110737534	110736665	110736701	110739091	110739246	3767	14258	0,0	3117	0,6	241	29	0.008309	1	1.0,1.0	1.0,0.701	0.149
6983	ENSG00000224078	none_found	chr15	+	25300220	25300377	25298974	25299114	25301629	25301712	6983	4,5	9,32	5,64	4,73	219	76	0.00833345	1	0.134,0.051	0.303,0.233	-0.176
44320	ENSG00000166167	BTRC	chr10	+	103221737	103221815	103113863	103113985	103239124	103239214	44320	1,54	0,27	2,66	0,8	140	83	0.0084323	1	1.0,0.542	1.0,0.83	-0.144
3140	ENSG00000174775	HRAS	chr11	-	533276	533358	532630	532755	533452	533612	3140	11177	51209	1134	20345	150	85	0.0085897	1	0.109,0.324	0.028,0.18	0.113
22761	ENSG00000174227	PIGG	chr4	+	494889	494959	494184	494390	499506	499716	22761	0,4	9,53	0,18	2,39	126	85	0.00863659	1	0.0,0.048	0.0,0.237	-0.095
4256	ENSG00000204257	HLA-DMA	chr6	-	32918295	32918580	32917387	32917666	32920725	32920899	4256	0,99	2,9	1113	0,0	356	85	0.00869902	1	0.0,0.724	1.0,1.0	-0.638
38852	ENSG00000189180	ZNF33A	chr10	+	38343302	38343439	38306218	38306314	38353015	38354023	38852	25121	0,0	12,63	0,8	208	85	0.00871609	1	1.0,1.0	1.0,0.763	0.119
821	ENSG00000189308	LIN54	chr4	-	83891479	83891622	83867410	83867627	83905313	83906029	821	14,73	4,17	12100	0,5	214	85	0.00872382	1	0.582,0.63	1.0,0.888	-0.338
52578	ENSG00000152242	C18orf25	chr18	+	43819970	43820153	43795776	43796561	43833662	43833786	52578	0,79	7130	4,82	3,56	254	85	0.00874039	1	0.0,0.169	0.309,0.329	-0.235
69824	ENSG00000135837	CEP350	chr1	+	179975588	179975702	179965687	179966310	179981063	179981210	69824	12117	1,23	11,87	0,2	185	85	0.00881481	1	0.846,0.7	1.0,0.952	-0.203
7494	ENSG00000138382	METTL5	chr2	-	170671986	170672038	170668966	170669016	170676070	170676153	7494	48,45	1,2	15,56	4,12	39	34	0.00884754	1	0.977,0.951	0.766,0.803	0.18
52138	ENSG00000196182	STK40	chr1	-	36833452	36833685	36826821	36826941	36851323	36851480	52138	14340	11227	20503	3167	304	85	0.00887286	1	0.262,0.295	0.651,0.457	-0.276
50124	ENSG00000198911	SREBF2	chr22	+	42295240	42295557	42294652	42294785	42296333	42296502	50124	12336	971871	10595	36810	388	85	0.00890324	1	0.026,0.038	0.057,0.139	-0.066
51287	ENSG00000008517	IL32	chr16	+	3115642	3115688	3115377	3115495	3115784	3115827	51287	2,18	0,1	0,11	1,7	39	36	0.00892941	1	1.0,0.943	0.0,0.592	0.676
28939	ENSG00000132549	VPS13B	chr8	+	100519364	100519431	100515063	100515178	100519997	100520139	28939	4,11	0,8	1,3	1,15	120	85	0.00896221	1	1.0,0.493	0.415,0.124	0.477
32295	ENSG00000197008	ZNF138	chr7	+	64275953	64276031	64275295	64275422	64291828	64292580	32295	3,46	2,20	1,16	8,21	142	85	0.00900878	1	0.473,0.579	0.07,0.313	0.335
72706	ENSG00000092096	SLC22A17	chr14	-	23817099	23817205	23816722	23816940	23817369	23817515	72706	2,63	0,0	2,51	0,10	177	85	0.00909692	1	1.0,1.0	1.0,0.71	0.145
13781	ENSG00000134077	THUMPD3	chr3	+	9422186	9422302	9416199	9416330	9424882	9424993	13781	14138	2,22	7177	0,4	187	85	0.00912304	1	0.761,0.74	1.0,0.953	-0.226
27712	ENSG00000125944	HNRNPR	chr1	-	23667344	23667510	23664762	23665101	23670703	23670810	27712	411197	16593	611720	13272	237	85	0.00913536	1	0.479,0.42	0.627,0.694	-0.211
72831	ENSG00000015479	MATR3	chr5	+	138615623	138615747	138614739	138614818	138618427	138618678	72831	7,85	4,14	9109	10,70	182	72	0.0091544	1	0.409,0.706	0.263,0.381	0.236
23305	ENSG00000124193	SRSF6	chr20	+	42087792	42088060	42087000	42087149	42088410	42088535	23305	661622	3249	531120	5388	339	85	0.00917346	1	0.847,0.62	0.727,0.42	0.16
57961	ENSG00000164211	STARD4	chr5	-	110837659	110837786	110836699	110836814	110842027	110842077	57961	32329	8149	18188	2,24	156	43	0.00917493	1	0.524,0.378	0.713,0.683	-0.247
46864	ENSG00000214022	REPIN1	chr7	+	150067848	150067973	150066759	150066957	150068316	150070210	46864	15441	2,98	9378	7170	196	85	0.00932043	1	0.765,0.661	0.358,0.491	0.289
32625	ENSG00000068305	MEF2A	chr15	+	100138634	100138716	100105904	100106309	100173182	100173378	32625	12,61	7123	11,63	3,51	150	85	0.00935622	1	0.493,0.219	0.675,0.412	-0.188
2907	ENSG00000122882	ECD	chr10	-	74923490	74923708	74920191	74920309	74927623	74927853	2907	12175	2,86	16229	0,46	289	85	0.00938653	1	0.638,0.374	1.0,0.594	-0.291
224	ENSG00000112425	EPM2A	chr6	-	145992374	145992535	145956380	145956622	146007257	146007432	224	0,9	1,36	2,21	1,15	232	85	0.00938656	1	0.0,0.084	0.423,0.339	-0.339
50772	ENSG00000064115	TM7SF3	chr12	-	27143382	27143560	27126127	27127160	27148169	27148230	50772	1022357	5143	1042237	2,23	218	54	0.00940709	1	0.835,0.803	0.928,0.96	-0.125
17999	ENSG00000162910	MRPL55	chr1	-	228296137	228296175	228295935	228296019	228296849	228297007	17999	11,62	13,63	4,48	8103	54	77	0.00945139	1	0.547,0.584	0.416,0.399	0.158
52144	ENSG00000196182	STK40	chr1	-	36833448	36833685	36826821	36826941	36851323	36851485	52144	12319	11227	16483	3167	308	85	0.00955985	1	0.231,0.279	0.595,0.444	-0.264
38120	ENSG00000185122	HSF1	chr8	+	145536313	145536397	145535648	145535930	145537196	145537302	38120	20170	71862	15266	34543	154	85	0.00957409	1	0.135,0.098	0.196,0.213	-0.088
5448	ENSG00000183814	LIN9	chr1	-	226483542	226483647	226475364	226475498	226485419	226485514	5448	5,38	3,55	6,46	0,23	176	85	0.00957882	1	0.446,0.25	1.0,0.491	-0.398
69224	ENSG00000001631	KRIT1	chr7	-	91873315	91873463	91871347	91871451	91874215	91874448	69224	12101	0,2	17,85	5,13	219	85	0.00960926	1	1.0,0.951	0.569,0.717	0.333
2669	ENSG00000162236	STX5	chr11	-	62598490	62598582	62595032	62595103	62599425	62599523	2669	8306	0,4	2286	0,40	149	64	0.00968752	1	1.0,0.97	1.0,0.754	0.108
7544	ENSG00000136758	YME1L1	chr10	-	27425204	27425314	27423759	27423910	27437834	27437969	7544	50245	11,36	42236	5,7	181	85	0.00969605	1	0.681,0.762	0.798,0.941	-0.148
49239	ENSG00000127152	BCL11B	chr14	-	99697681	99697894	99635623	99642532	99737497	99737565	49239	48711	2,77	961112	2,30	260	61	0.00979028	1	0.849,0.684	0.918,0.897	-0.141
17723	ENSG00000111271	ACAD10	chr12	+	112183947	112184088	112182446	112182847	112184852	112184990	17723	4,45	1,19	6144	1,16	212	85	0.00981194	1	0.616,0.487	0.706,0.783	-0.193
31518	ENSG00000132950	ZMYM5	chr13	-	20411795	20411961	20409616	20409829	20425494	20426330	31518	2,9	0,24	4,25	1,9	237	85	0.00987731	1	1.0,0.119	0.589,0.499	0.015
34694	ENSG00000114956	DGUOK	chr2	+	74184251	74184367	74154034	74154179	74185272	74185372	34694	61209	15,90	36380	5,71	187	85	0.00991435	1	0.649,0.514	0.766,0.709	-0.156
61886	ENSG00000237819	none_found	chr7	+	92484222	92484267	92465802	92465877	92546150	92546437	61886	49412	22215	48466	12126	59	68	0.00991805	1	0.72,0.688	0.822,0.81	-0.112
25264	ENSG00000234545	FAM133B	chr7	-	92195323	92195375	92190450	92191682	92199136	92199229	25264	6147	1,46	8106	0,9	90	85	0.00992227	1	0.85,0.751	1.0,0.918	-0.159
16857	ENSG00000126768	TIMM17B	chrX	-	48752634	48752784	48752321	48752384	48754041	48754141	16857	10215	121972	24357	34999	192	56	0.0101051	1	0.024,0.061	0.171,0.094	-0.09
26877	ENSG00000121753	BAI2	chr1	-	32200783	32200882	32198572	32198744	32201180	32201266	26877	1,31	4123	3,63	3,88	164	79	0.010113	1	0.107,0.108	0.325,0.256	-0.183
625	ENSG00000133612	AGAP3	chr7	+	150817606	150817654	150817073	150817232	150819811	150819880	625	0,7	1,17	0,28	1,10	59	62	0.0101255	1	0.0,0.302	0.0,0.746	-0.222
21000	ENSG00000123965	none_found	chr7	+	74312525	74312628	74312262	74312349	74313767	74313951	21000	20,90	11,64	17124	5,18	169	80	0.0102443	1	0.463,0.4	0.617,0.765	-0.26
44589	ENSG00000198157	HMGN5	chrX	-	80375286	80375316	80374228	80374258	80377033	80377171	44589	10,92	6,17	6,61	7,32	23	23	0.0102676	1	0.625,0.844	0.462,0.656	0.175
13777	ENSG00000134077	THUMPD3	chr3	+	9419502	9419572	9416199	9416330	9424882	9424993	13777	13141	2,22	14179	0,4	126	85	0.0103288	1	0.814,0.812	1.0,0.968	-0.171
40780	ENSG00000226752	none_found	chr9	+	123607270	123607474	123605377	123605717	123609571	123609631	40780	20,92	0,10	8,91	0,39	243	53	0.0103368	1	1.0,0.667	1.0,0.337	0.165
38345	ENSG00000072518	MARK2	chr11	+	63673559	63673586	63672257	63672515	63676348	63677051	38345	0,9	1,29	1,10	1,8	40	85	0.0103767	1	0.0,0.397	0.68,0.726	-0.505
37234	ENSG00000185187	SIGIRR	chr11	-	409867	410027	408072	408206	414822	414957	37234	24403	2,80	14749	0,49	231	85	0.0103825	1	0.815,0.65	1.0,0.849	-0.192
56365	ENSG00000196839	ADA	chr20	-	43254209	43254325	43251469	43251571	43257687	43257810	56365	461126	4166	221346	0,55	187	85	0.0103913	1	0.839,0.755	1.0,0.918	-0.162
51377	ENSG00000166801	FAM111A	chr11	+	58913299	58913329	58912251	58912369	58916269	58916426	51377	2,38	1,44	3,43	0,21	46	85	0.0105498	1	0.787,0.615	1.0,0.791	-0.194
40937	ENSG00000177150	FAM210A	chr18	-	13671860	13671972	13663349	13666712	13726327	13726591	40937	7,82	0,73	19103	0,23	183	85	0.0105694	1	1.0,0.343	1.0,0.675	-0.166
35290	ENSG00000025039	RRAGD	chr6	-	90087389	90087532	90074716	90077926	90097013	90097309	35290	8,68	1,17	8,37	0,0	214	85	0.0106703	1	0.761,0.614	1.0,1.0	-0.313
71063	ENSG00000168522	FNTA	chr8	+	42914234	42914320	42911295	42911689	42924697	42924802	71063	4281	3,56	8498	0,36	158	85	0.0108142	1	0.418,0.73	1.0,0.882	-0.367
39897	ENSG00000119487	MAPKAP1	chr9	-	128432096	128432186	128419929	128420078	128469249	128469491	39897	20129	4,29	30163	0,14	166	85	0.0108311	1	0.719,0.695	1.0,0.856	-0.221
60531	ENSG00000172244	C5orf34	chr5	-	43509246	43509477	43508678	43508768	43514907	43515247	60531	3,27	3,12	3,39	0,2	300	83	0.0108352	1	0.217,0.384	1.0,0.844	-0.621
3766	ENSG00000109534	GAR1	chr4	+	110737308	110737534	110736983	110737161	110739091	110739246	3766	13251	0,0	3118	0,8	297	85	0.0108676	1	1.0,1.0	1.0,0.808	0.096
37938	ENSG00000060237	WNK1	chr12	+	974275	974530	971248	971436	977031	978270	37938	3,23	1,14	1,11	5,34	326	85	0.0108812	1	0.439,0.3	0.05,0.078	0.306
23242	ENSG00000148399	WDR85	chr9	-	140459344	140459410	140458885	140459058	140459536	140459945	23242	15386	1,13	3271	0,47	118	85	0.0109398	1	0.915,0.955	1.0,0.806	0.032
40626	ENSG00000163689	C3orf67	chr3	-	58899423	58899590	58870270	58870435	58923373	58923488	40626	9,60	0,0	5,44	0,8	238	85	0.0109488	1	1.0,1.0	1.0,0.663	0.168
67180	ENSG00000134905	CARS2	chr13	-	111296411	111296529	111294661	111294868	111296731	111296830	67180	15,96	11,55	1147	0,25	189	85	0.0109939	1	0.38,0.44	1.0,0.726	-0.453
11414	ENSG00000179151	EDC3	chr15	-	74979431	74979520	74967301	74967483	74988220	74988386	11414	14132	17466	8368	2606	164	85	0.0109955	1	0.299,0.128	0.675,0.239	-0.244
64713	ENSG00000093144	ECHDC1	chr6	-	127637594	127637647	127635960	127636041	127648146	127648282	64713	5,60	8,29	12101	4,21	81	74	0.0110784	1	0.363,0.654	0.733,0.815	-0.266
46868	ENSG00000214022	REPIN1	chr7	+	150067848	150067973	150065878	150066030	150068319	150068721	46868	7282	0,39	2204	0,70	196	85	0.0110941	1	1.0,0.758	1.0,0.558	0.1
14888	ENSG00000257076	none_found	chr12	-	123712009	123712163	123707584	123707674	123714807	123715069	14888	58137	4,25	19,83	8,31	223	83	0.0111114	1	0.844,0.671	0.469,0.499	0.274
61106	ENSG00000181852	RNF41	chr12	-	56606775	56606922	56604256	56604352	56607741	56607854	61106	0,9	5257	2,77	3321	218	85	0.0111767	1	0.0,0.013	0.206,0.086	-0.139
32942	ENSG00000137760	ALKBH8	chr11	-	107420478	107420549	107403025	107403132	107422533	107422638	32942	2,18	0,20	2,29	0,6	128	85	0.0111776	1	1.0,0.374	1.0,0.762	-0.194
3300	ENSG00000116237	ICMT	chr1	-	6294464	6294571	6291961	6292179	6294945	6295034	3300	3,25	3,46	6,69	3,15	175	82	0.0112168	1	0.319,0.203	0.484,0.683	-0.323
47473	ENSG00000197622	CDC42SE1	chr1	-	151029131	151029262	151028058	151028469	151031954	151032249	47473	2,59	36592	6227	31671	202	85	0.0112764	1	0.023,0.04	0.075,0.125	-0.069
46993	ENSG00000090316	MAEA	chr4	+	1316168	1316291	1309184	1309388	1326544	1326653	46993	4379	2,98	6701	0,60	194	85	0.0112875	1	0.467,0.629	1.0,0.837	-0.37
9490	ENSG00000171574	ZNF584	chr19	+	58921307	58921458	58920062	58920532	58926890	58927013	9490	2,37	4,52	1,74	0,36	222	85	0.0113351	1	0.161,0.214	1.0,0.44	-0.533
48343	ENSG00000198707	CEP290	chr12	-	88448116	88448190	88447428	88447523	88449352	88449494	48343	10,62	3,31	4,84	0,13	134	85	0.0113359	1	0.679,0.559	1.0,0.804	-0.283
64353	ENSG00000100129	EIF3L	chr22	+	38254685	38254747	38247286	38247497	38266182	38266354	64353	1,15	0,21	1,18	0,4	110	85	0.011348	1	1.0,0.356	1.0,0.777	-0.211
52710	ENSG00000177565	TBL1XR1	chr3	-	176797614	176797733	176782707	176782810	176914908	176914971	52710	4,52	3104	12,92	2,71	161	56	0.0114032	1	0.317,0.148	0.676,0.311	-0.261
25631	ENSG00000184007	PTP4A2	chr1	-	32381495	32381588	32377296	32377427	32403587	32403988	25631	126882	3126	152964	0,31	170	85	0.0115402	1	0.955,0.778	1.0,0.94	-0.103
16122	ENSG00000110075	PPP6R3	chr11	+	68350510	68350597	68343425	68343511	68355394	68355492	16122	12,85	15,78	10103	5,42	154	79	0.0116164	1	0.291,0.359	0.506,0.557	-0.207
29085	ENSG00000114200	BCHE	chr3	-	165547304	165548829	165503932	165504099	165555101	165555250	29085	86812	9,49	75920	0,22	1596	85	0.0116361	1	0.337,0.469	1.0,0.69	-0.442
50675	ENSG00000133943	C14orf159	chr14	+	91611564	91611657	91580731	91580872	91623982	91624034	50675	0,25	4,43	2,58	2,32	130	45	0.0116556	1	0.0,0.168	0.257,0.386	-0.238
14493	ENSG00000234127	TRIM26	chr6	-	30168811	30168915	30166442	30166930	30181081	30181204	14493	7234	0,62	19453	0,24	175	85	0.0116583	1	1.0,0.647	1.0,0.902	-0.128
66349	ENSG00000060069	CTDP1	chr18	+	77472971	77473138	77464766	77464917	77513651	77514510	66349	3,34	0,11	3,35	0,0	238	85	0.0116649	1	1.0,0.525	1.0,1.0	-0.238
38952	ENSG00000074266	EED	chr11	+	85979497	85979603	85975213	85975305	85988021	85988180	38952	8,59	1,8	17,66	0,0	177	85	0.0117755	1	0.793,0.78	1.0,1.0	-0.214
50144	ENSG00000143033	MTF2	chr1	+	93586105	93586229	93584889	93584958	93599259	93599297	50144	16175	1,11	15169	0,0	118	8	0.0117949	1	0.52,0.519	1.0,1.0	-0.48
7723	ENSG00000115525	ST3GAL5	chr2	-	86074504	86074685	86073499	86073686	86074983	86076699	7723	0,6	11,56	0,27	5,35	252	85	0.0119179	1	0.0,0.035	0.0,0.206	-0.085
14401	ENSG00000043514	TRIT1	chr1	-	40312891	40312969	40310202	40310312	40348989	40349152	14401	8132	1,37	20170	2,14	142	85	0.0119403	1	0.827,0.681	0.857,0.879	-0.114
43427	ENSG00000196498	NCOR2	chr12	-	125020110	125020157	124979692	124979914	125051853	125052010	43427	2,32	4119	1,36	1,54	80	85	0.0119448	1	0.347,0.222	0.515,0.415	-0.181
62885	ENSG00000159322	ADPGK	chr15	-	73067212	73067438	73052747	73052868	73075799	73076126	62885	16333	2,47	16468	0,22	297	85	0.0119892	1	0.696,0.67	1.0,0.859	-0.246
16610	ENSG00000175455	CCDC14	chr3	-	123675201	123675274	123667742	123667979	123675586	123675642	16610	0,8	2,31	1,14	1,10	96	49	0.0119918	1	0.0,0.116	0.338,0.417	-0.32
29867	ENSG00000102445	KIAA0226L	chr13	-	46946075	46946732	46942867	46942950	46961268	46961621	29867	18436	0,21	32564	0,5	719	76	0.012055	1	1.0,0.687	1.0,0.923	-0.118
14268	ENSG00000117360	PRPF3	chr1	+	150300015	150300111	150298208	150298339	150300778	150300925	14268	8,91	10221	1104	0,110	170	85	0.012115	1	0.286,0.171	1.0,0.321	-0.432
36492	ENSG00000239779	WBP1	chr2	+	74686604	74686689	74686006	74686225	74686769	74686872	36492	2130	0,28	5119	2,66	156	85	0.0121927	1	1.0,0.717	0.577,0.496	0.322
37226	ENSG00000185187	SIGIRR	chr11	-	409859	410027	408072	408206	414822	415004	37226	23374	2,80	13705	0,49	239	85	0.0122154	1	0.804,0.624	1.0,0.837	-0.205
6326	ENSG00000163808	KIF15	chr3	+	44822376	44822414	44819606	44819683	44826336	44826434	6326	3,36	1,15	8,36	0,3	47	70	0.012217	1	0.817,0.781	1.0,0.947	-0.175
25641	ENSG00000081870	HSPB11	chr1	-	54394044	54394113	54389576	54389620	54405657	54405770	25641	8,29	0,14	7,26	0,0	76	37	0.0123056	1	1.0,0.502	1.0,1.0	-0.249
27387	ENSG00000167595	C19orf55	chr19	+	36255967	36256077	36255754	36255837	36257668	36258967	27387	10165	0,8	17188	5,34	172	76	0.0123177	1	1.0,0.901	0.6,0.71	0.296
61105	ENSG00000181852	RNF41	chr12	-	56606779	56606922	56604031	56604352	56607741	56607802	61105	0,32	5257	3137	3321	183	54	0.0125264	1	0.0,0.035	0.228,0.112	-0.153
25515	ENSG00000049618	ARID1B	chr6	+	157495980	157496139	157495141	157495251	157502102	157502312	25515	20185	4,47	13,82	4,61	230	85	0.0126512	1	0.649,0.593	0.546,0.332	0.182
28166	ENSG00000167615	LENG8	chr19	+	54962466	54962559	54960064	54960488	54963269	54963444	28166	654271	0,94	255726	3478	170	85	0.0126607	1	1.0,0.958	0.806,0.857	0.147
28940	ENSG00000132549	VPS13B	chr8	+	100519364	100519431	100515063	100515178	100523331	100523740	28940	3,20	0,6	0,7	2,9	120	85	0.012691	1	1.0,0.702	0.0,0.355	0.674
12665	ENSG00000129351	ILF3	chr19	+	10798021	10798384	10794592	10794646	10799225	10799354	12665	1626052	2,63	745233	2228	396	47	0.0131514	1	0.906,0.919	0.815,0.731	0.14
49139	ENSG00000135476	ESPL1	chr12	+	53668600	53668794	53666504	53666641	53670403	53670643	49139	12471	1,46	13687	0,17	265	85	0.0131801	1	0.794,0.767	1.0,0.928	-0.184
16632	ENSG00000182903	ZNF721	chr4	-	466363	466490	435483	438221	467769	467840	16632	58407	5,79	34405	1,19	177	64	0.0132719	1	0.807,0.651	0.925,0.885	-0.176
20820	ENSG00000205583	none_found	chr7	+	74995592	74995707	74994832	74994912	75014358	75014432	20820	0,2	1,7	2,20	0,6	156	55	0.0132946	1	0.0,0.092	1.0,0.54	-0.724
65872	ENSG00000244625	none_found	chr22	+	27089643	27089799	27068729	27068950	27113215	27113422	65872	4,38	5,41	6,72	2,27	227	85	0.013392	1	0.231,0.258	0.529,0.5	-0.27
16021	ENSG00000175471	MCTP1	chr5	-	94267657	94267696	94248510	94248681	94275787	94275899	16021	0,3	2,18	2,6	0,8	64	85	0.0134358	1	0.0,0.181	1.0,0.499	-0.659
42636	ENSG00000158882	TOMM40L	chr1	+	161197047	161197140	161196677	161196745	161197673	161197779	42636	2,56	0,8	2,88	0,0	146	61	0.0135099	1	1.0,0.745	1.0,1.0	-0.127
68861	ENSG00000132356	PRKAA1	chr5	-	40769517	40769605	40767567	40767792	40771820	40771965	68861	28135	9,15	30160	0,7	162	85	0.0135156	1	0.62,0.825	1.0,0.923	-0.239
15167	ENSG00000167397	VKORC1	chr16	-	31104632	31104742	31102412	31102663	31105877	31105923	15167	792203	36630	582789	14433	135	39	0.0135346	1	0.388,0.503	0.545,0.65	-0.152
50121	ENSG00000198911	SREBF2	chr22	+	42296023	42296126	42294652	42294785	42296333	42296502	50121	10148	971871	9432	36810	174	85	0.0135466	1	0.048,0.037	0.109,0.207	-0.116
60149	ENSG00000138778	CENPE	chr4	-	104104357	104104445	104102493	104102613	104106966	104107018	60149	4,13	0,10	9,28	0,2	122	45	0.0135874	1	1.0,0.324	1.0,0.838	-0.257
36279	ENSG00000100038	TOP3B	chr22	-	22325351	22325433	22324581	22324778	22326248	22326323	36279	1350	0,106	0,220	3136	133	68	0.0136378	1	1.0,0.628	0.0,0.453	0.588
35102	ENSG00000138303	ASCC1	chr10	-	73862091	73862170	73856278	73857208	73887839	73887925	35102	0,8	13,62	3,20	7,47	138	79	0.0136388	1	0.0,0.069	0.197,0.196	-0.162
29995	ENSG00000124782	RREB1	chr6	+	7240670	7240835	7229229	7232140	7246656	7247454	29995	8,36	1,51	0,30	5,92	236	85	0.0136869	1	0.742,0.203	0.0,0.105	0.42
37375	ENSG00000128595	CALU	chr7	+	128388626	128388858	128379395	128379486	128398924	128399091	37375	571098	2,97	391153	0,22	302	84	0.0136958	1	0.888,0.759	1.0,0.936	-0.144
72959	ENSG00000145247	OCIAD2	chr4	-	48901845	48901942	48899820	48899874	48906500	48906628	72959	85888	9100	111969	2,49	132	47	0.0137916	1	0.771,0.76	0.952,0.876	-0.148
72292	ENSG00000136754	ABI1	chr10	-	27047990	27048167	27040526	27040712	27054146	27054247	72292	39869	8145	44977	4,70	248	85	0.0138147	1	0.626,0.673	0.79,0.827	-0.159
33392	ENSG00000147050	KDM6A	chrX	+	44919266	44919401	44918526	44918711	44920568	44920664	33392	3,62	0,18	6,30	0,0	206	85	0.0139251	1	1.0,0.587	1.0,1.0	-0.207
15797	ENSG00000158636	C11orf30	chr11	+	76170976	76171129	76169226	76169402	76174864	76175124	15797	19203	3,10	23154	6,29	224	85	0.0139448	1	0.706,0.885	0.593,0.668	0.165
6838	ENSG00000124588	NQO2	chr6	+	3004728	3004885	3000222	3000319	3006701	3006793	6838	3,27	16226	4,50	3132	228	85	0.0140573	1	0.065,0.043	0.332,0.124	-0.174
55143	ENSG00000170791	CHCHD7	chr8	+	57125320	57125448	57124356	57124396	57127156	57127226	55143	42340	18193	41704	12133	125	11	0.0140676	1	0.17,0.134	0.231,0.318	-0.123
56218	ENSG00000111445	RFC5	chr12	+	118455494	118455620	118454507	118454697	118456876	118456941	56218	3169	5331	2113	12600	170	58	0.0141163	1	0.17,0.148	0.054,0.06	0.102
31100	ENSG00000179029	TMEM107	chr17	-	8079276	8079344	8077320	8077590	8079517	8079692	31100	5233	10109	14436	3122	122	85	0.0141196	1	0.258,0.598	0.765,0.713	-0.311
54404	ENSG00000066427	ATXN3	chr14	-	92562436	92562481	92560089	92560175	92563017	92563182	54404	23,94	1,7	2,74	3,9	70	79	0.0141249	1	0.963,0.938	0.429,0.903	0.284
67984	ENSG00000125952	MAX	chr14	-	65568263	65568290	65560425	65560533	65569021	65569078	67984	3,91	11393	6150	15311	20	50	0.0142927	1	0.405,0.367	0.5,0.547	-0.138
6883	ENSG00000175497	DPP10	chr2	+	116594082	116594141	116593732	116593832	116594249	116594322	6883	2,27	0,0	0,6	1,2	85	66	0.0144215	1	1.0,1.0	0.0,0.7	0.65
25857	ENSG00000143494	VASH2	chr1	+	213124930	213125160	213123886	213124082	213134507	213134596	25857	11344	2,35	1217	2,57	298	82	0.0144408	1	0.602,0.73	0.121,0.512	0.349
38781	ENSG00000116704	SLC35D1	chr1	-	67517694	67517762	67516115	67516187	67518453	67518540	38781	4,31	0,0	1,17	0,5	97	60	0.0144721	1	1.0,1.0	1.0,0.678	0.161
23449	ENSG00000114416	FXR1	chr3	+	180693100	180693192	180687945	180688146	180693909	180694070	23449	110620	37535	27370	27459	170	85	0.0145391	1	0.598,0.367	0.333,0.287	0.173
54424	ENSG00000066427	ATXN3	chr14	-	92562436	92562478	92560089	92560175	92563017	92563182	54424	7,15	1,7	0,9	3,9	64	79	0.0146144	1	0.896,0.726	0.0,0.552	0.535
31812	ENSG00000123562	MORF4L2	chrX	-	102939608	102939657	102933426	102933548	102940098	102940188	31812	5156	3,41	7292	1,24	82	83	0.0146768	1	0.628,0.794	0.876,0.925	-0.19
59868	ENSG00000115993	TRAK2	chr2	-	202265740	202265817	202264099	202264216	202272125	202272320	59868	2,22	0,12	6,45	0,5	140	85	0.0146785	1	1.0,0.527	1.0,0.845	-0.159
7542	ENSG00000136758	YME1L1	chr10	-	27434356	27434519	27423759	27423910	27437834	27437969	7542	69337	11,36	69276	5,7	234	85	0.0146958	1	0.695,0.773	0.834,0.935	-0.151
9930	ENSG00000048740	CELF2	chr10	+	11308560	11308640	11299700	11299835	11312628	11312787	9930	20354	9111	19549	1,89	146	85	0.0147338	1	0.564,0.65	0.917,0.782	-0.243
60956	ENSG00000148840	PPRC1	chr10	+	103902801	103902855	103898856	103901761	103906428	103907149	60956	1,68	1,11	5,86	0,0	94	85	0.0147466	1	0.475,0.848	1.0,1.0	-0.339
70188	ENSG00000138400	MDH1B	chr2	-	207615657	207615799	207613743	207613907	207619732	207620229	70188	2,1	0,3	5,15	0,0	213	85	0.0147647	1	1.0,0.117	1.0,1.0	-0.442
40630	ENSG00000163689	C3orf67	chr3	-	58899433	58899590	58870270	58870435	58923373	58923488	40630	14,74	0,0	5,64	0,8	228	85	0.0147753	1	1.0,1.0	1.0,0.749	0.125
49372	ENSG00000028310	BRD9	chr5	-	868721	868919	865528	865696	870587	870668	49372	4103	16344	2242	3317	258	74	0.014913	1	0.067,0.079	0.161,0.18	-0.097
27713	ENSG00000125944	HNRNPR	chr1	-	23667344	23667513	23664982	23665101	23670703	23670815	27713	37936	16593	501355	13272	240	85	0.0151045	1	0.45,0.359	0.577,0.638	-0.203
27394	ENSG00000167595	C19orf55	chr19	+	36255934	36256077	36255754	36255837	36257668	36257856	27394	15210	0,8	21245	5,34	205	76	0.0151814	1	1.0,0.907	0.609,0.728	0.285
38548	ENSG00000241553	ARPC4,ARPC4-TTLL3	chr3	+	9845219	9845391	9843344	9843440	9845526	9845697	38548	2,24	30336	5,76	14276	243	85	0.015246	1	0.023,0.024	0.111,0.088	-0.076
61902	ENSG00000083123	BCKDHB	chr6	+	80879527	80879621	80878591	80878747	80880998	80881107	61902	3,15	11,83	0,1	20,80	170	85	0.015383	1	0.12,0.083	0.0,0.006	0.099
12153	ENSG00000215580	none_found	chrY	-	21635790	21636030	21628341	21629260	21636525	21636789	12153	20503	3,32	31567	0,7	311	85	0.0154158	1	0.646,0.811	1.0,0.957	-0.25
67583	ENSG00000165219	GAPVD1	chr9	+	128097450	128097531	128094788	128094908	128099296	128099374	67583	1,21	7,94	3,50	5,80	134	71	0.0154724	1	0.07,0.106	0.241,0.249	-0.157
70991	ENSG00000188647	PTAR1	chr9	-	72356707	72356774	72349065	72349170	72374768	72374858	70991	4266	0,62	9231	0,17	118	83	0.015715	1	1.0,0.751	1.0,0.905	-0.077
28082	ENSG00000126746	ZNF384	chr12	-	6787828	6787876	6787292	6787626	6788111	6788349	28082	8483	3325	12521	3188	82	85	0.0157724	1	0.734,0.606	0.806,0.742	-0.104
18002	ENSG00000162910	MRPL55	chr1	-	228296137	228296175	228295935	228296022	228296849	228297007	18002	3,11	0,1	1,10	1,8	57	80	0.0158306	1	1.0,0.939	0.584,0.637	0.359
36845	ENSG00000123219	CENPK	chr5	-	64824745	64824876	64824278	64824405	64824943	64825026	36845	20,99	1,15	3,67	6,12	193	76	0.0158342	1	0.887,0.722	0.165,0.687	0.378
11790	ENSG00000141562	NARF	chr17	+	80422162	80422306	80417867	80417948	80426639	80426772	11790	1041756	8178	771380	1,52	204	74	0.0159134	1	0.825,0.782	0.965,0.906	-0.132
24646	ENSG00000104218	CSPP1	chr8	+	68062017	68062170	68049690	68049838	68066258	68066371	24646	9,70	3,20	13120	0,11	224	85	0.015942	1	0.532,0.57	1.0,0.805	-0.352
40875	ENSG00000181135	ZNF707	chr8	+	144773242	144773369	144772226	144772293	144775840	144777554	40875	4,69	2,18	3109	0,7	173	60	0.0160192	1	0.41,0.571	1.0,0.844	-0.432
34960	ENSG00000100429	HDAC10	chr22	-	50687259	50687319	50687090	50687180	50687756	50687883	34960	5126	4,5	0,143	1,29	104	83	0.0160363	1	0.499,0.953	0.0,0.797	0.327
32209	ENSG00000184465	WDR27	chr6	-	170063658	170063745	170062399	170062520	170064261	170064382	32209	3,78	0,15	3127	0,3	160	85	0.016187	1	1.0,0.734	1.0,0.957	-0.111
19274	ENSG00000101084	TGIF2-C20ORF24,C20orf24	chr20	+	35236292	35236403	35236117	35236221	35238003	35238133	19274	12,95	52610	14197	27522	182	85	0.0161882	1	0.097,0.068	0.195,0.15	-0.09
32872	ENSG00000172590	MRPL52	chr14	+	23300172	23300246	23299395	23299463	23303380	23304186	32872	3,36	9103	2,61	2,72	110	61	0.016236	1	0.156,0.162	0.357,0.32	-0.18
41365	ENSG00000228106	DISP1	chr1	+	223000769	223000943	222997197	222997287	223008460	223008557	41365	0,12	2,4	6,27	0,1	243	83	0.0162535	1	0.0,0.506	1.0,0.902	-0.698
9492	ENSG00000171574	ZNF584	chr19	+	58921331	58921458	58920143	58920532	58926890	58927013	9492	3,44	4,52	1,80	0,36	198	85	0.0163678	1	0.244,0.266	1.0,0.488	-0.489
9608	ENSG00000111196	MAGOHB	chr12	-	10765238	10765577	10763220	10763279	10766037	10766208	9608	18141	19173	2,65	22208	377	52	0.0164136	1	0.116,0.101	0.012,0.041	0.082
16979	ENSG00000101246	ARFRP1	chr20	-	62338350	62338444	62338002	62338090	62339218	62339355	16979	13253	1,38	9421	0,16	166	81	0.0164743	1	0.864,0.765	1.0,0.928	-0.149
45496	ENSG00000160813	PPP1R35	chr7	-	100033253	100033390	100032904	100033156	100033470	100034046	45496	120734	8,48	65934	9147	208	85	0.0164912	1	0.86,0.862	0.747,0.722	0.127
37734	ENSG00000100206	DMC1	chr22	-	38948670	38948712	38934543	38934617	38951361	38951414	37734	3,0	2,3	3,7	0,2	17	28	0.0165114	1	0.712,0.0	1.0,0.852	-0.57
31559	ENSG00000112033	PPARD	chr6	+	35314843	35314927	35310390	35310458	35378763	35378994	31559	6169	2,31	2345	0,17	130	61	0.0165723	1	0.585,0.719	1.0,0.905	-0.301
51897	ENSG00000113593	PPWD1	chr5	+	64863339	64863442	64859065	64859333	64872705	64872896	51897	5181	2107	4224	0,63	174	85	0.016725	1	0.55,0.452	1.0,0.635	-0.317
2106	ENSG00000198771	RCSD1	chr1	+	167609807	167609949	167599485	167599666	167610627	167611243	2106	1,9	0,0	2,10	0,19	213	85	0.0167686	1	1.0,1.0	1.0,0.174	0.413
12158	ENSG00000215580	none_found	chrY	-	21621844	21621990	21621174	21621252	21626991	21627113	12158	11170	2,35	11120	0,7	203	71	0.01689	1	0.658,0.629	1.0,0.857	-0.285
30163	ENSG00000092108	SCFD1	chr14	+	31097414	31097485	31091317	31091605	31099682	31099771	30163	3,65	0,65	6127	0,34	125	82	0.0168944	1	1.0,0.396	1.0,0.71	-0.157
4378	ENSG00000181938	GINS3	chr16	+	58437001	58437235	58426324	58426691	58438402	58440047	4378	11407	0,58	14357	1132	305	85	0.0169054	1	1.0,0.662	0.796,0.43	0.218
4197	ENSG00000244687	UBE2V1,TMEM189-UBE2V1	chr20	-	48732021	48732158	48713208	48713357	48732235	48732491	4197	5,30	0,0	2,36	0,10	208	85	0.0169477	1	1.0,1.0	1.0,0.595	0.203
38104	ENSG00000198176	TFDP1	chr13	+	114291934	114292211	114290848	114291015	114294434	114294625	38104	45702	3,80	17899	0,29	348	85	0.0170325	1	0.786,0.682	1.0,0.883	-0.208
39162	ENSG00000178773	CPNE7	chr16	+	89662238	89662332	89661983	89662011	89662891	89663257	39162	0,24	6131	0,75	1,35	106	21	0.0171531	1	0.0,0.035	0.0,0.298	-0.132
37685	ENSG00000258984	SCLY	chr2	+	238976705	238976806	238972997	238973110	238990349	238990477	37685	2,68	0,8	3109	0,0	172	85	0.0171596	1	1.0,0.808	1.0,1.0	-0.096
27737	ENSG00000144468	RHBDD1	chr2	+	227704124	227704343	227700759	227700803	227729319	227729572	27737	13,89	3,48	18220	1,43	242	37	0.0171746	1	0.399,0.221	0.733,0.439	-0.276
39869	ENSG00000100445	SDR39U1	chr14	-	24910879	24911001	24910059	24910132	24911383	24911472	39869	42939	3,42	22760	2101	171	63	0.0173489	1	0.838,0.892	0.802,0.735	0.097
49812	ENSG00000162775	RBM15	chr1	+	110888160	110888271	110881127	110884890	110888929	110889299	49812	30189	12,96	16,98	10105	182	85	0.0173827	1	0.539,0.479	0.428,0.304	0.143
51877	ENSG00000180376	CCDC66	chr3	+	56593596	56593622	56592872	56592938	56597711	56598153	51877	1,23	0,0	0,16	1,7	19	59	0.0174852	1	1.0,1.0	0.0,0.877	0.562
18940	ENSG00000173209	AHSA2	chr2	+	61410681	61410797	61408454	61408540	61411846	61411935	18940	15274	25679	5311	6364	178	76	0.0175856	1	0.204,0.147	0.262,0.267	-0.089
29863	ENSG00000102445	KIAA0226L	chr13	-	46946075	46946345	46942867	46942950	46961268	46961387	29863	6192	0,21	13212	0,5	332	76	0.0176258	1	1.0,0.677	1.0,0.907	-0.115
39613	ENSG00000205664	none_found	chrX	-	3740414	3740621	3734597	3735819	3746546	3746638	39613	2,69	0,33	11,97	1,15	278	85	0.017688	1	1.0,0.39	0.771,0.664	-0.022
1624	ENSG00000102908	NFAT5	chr16	+	69680419	69680481	69660305	69660431	69680930	69681489	1624	0,14	7,61	1,26	5,38	110	85	0.0178008	1	0.0,0.151	0.134,0.346	-0.164
7284	ENSG00000110422	HIPK3	chr11	+	33369711	33369774	33369397	33369559	33370692	33370833	7284	0,17	1,23	1,17	0,6	112	85	0.0178612	1	0.0,0.359	1.0,0.683	-0.662
67481	ENSG00000164362	TERT	chr5	-	1264518	1264707	1260588	1260715	1266578	1266650	67481	1,50	0,5	1123	0,0	240	65	0.0178658	1	1.0,0.73	1.0,1.0	-0.135
30372	ENSG00000213420	GPC2	chr7	-	99773194	99773517	99771080	99772388	99773829	99773988	30372	22398	1,33	5130	0,64	394	85	0.0178949	1	0.826,0.722	1.0,0.305	0.122
51283	ENSG00000008517	IL32	chr16	+	3115621	3115688	3115404	3115495	3115784	3115827	51283	2,18	0,1	0,11	1,7	70	35	0.0178966	1	1.0,0.9	0.0,0.44	0.73
12818	ENSG00000197054	ZNF763	chr19	+	12088185	12088246	12087843	12087979	12088930	12090390	12818	4,16	0,2	1,5	0,6	108	85	0.0179131	1	1.0,0.863	1.0,0.396	0.234
63121	ENSG00000145029	NICN1	chr3	-	49463315	49463429	49462799	49462871	49463684	49463861	63121	8525	0,13	9611	1,63	165	65	0.017964	1	1.0,0.941	0.78,0.793	0.184
72115	ENSG00000151725	MLF1IP	chr4	-	185621973	185622035	185618800	185618957	185623242	185623290	72115	12,72	5,19	16,90	0,9	66	41	0.0180339	1	0.599,0.702	1.0,0.861	-0.28
67877	ENSG00000119314	PTBP3	chr9	-	115038123	115038293	115030328	115030475	115060111	115060196	67877	73347	0,32	81184	6,35	234	78	0.0181826	1	1.0,0.783	0.818,0.637	0.164
69303	ENSG00000093000	NUP50	chr22	+	45567689	45567918	45567480	45567564	45571774	45571961	69303	4229	35226	1,72	28234	292	77	0.0181972	1	0.029,0.211	0.009,0.075	0.078
60671	ENSG00000005955	GGNBP2	chr17	+	34901467	34901666	34900815	34900946	34910660	34910741	60671	161687	0,6	21386	2,75	259	74	0.0182646	1	1.0,0.988	0.222,0.841	0.463
52372	ENSG00000133794	ARNTL	chr11	+	13347959	13348014	13331533	13331606	13371491	13371617	52372	0,4	3,31	0,12	2,16	77	66	0.0182756	1	0.0,0.1	0.0,0.391	-0.146
36381	ENSG00000258838	ERCC6	chr10	-	50738765	50738886	50736462	50736571	50740588	50741024	36381	1,54	1,14	3,63	0,3	192	85	0.0182794	1	0.307,0.631	1.0,0.903	-0.483
59114	ENSG00000139620	KANSL2	chr12	-	49056342	49056437	49054250	49054402	49061475	49061572	59114	0,42	10264	2,66	6161	170	85	0.0182929	1	0.0,0.074	0.143,0.17	-0.12
23862	ENSG00000113387	none_found	chr5	+	32571196	32571280	32531923	32532022	32588617	32588690	23862	33264	31205	36549	18246	135	66	0.0182983	1	0.342,0.386	0.494,0.522	-0.144
39791	ENSG00000164136	IL15	chr4	+	142577338	142577460	142557751	142557901	142609974	142610188	39791	5,61	0,9	3,79	0,0	193	85	0.0183542	1	1.0,0.749	1.0,1.0	-0.125
33405	ENSG00000156675	RAB11FIP1	chr8	-	37728795	37730697	37727937	37728046	37732032	37732840	33405	39412	11155	33620	2,89	1973	85	0.0185055	1	0.133,0.103	0.415,0.231	-0.205
26551	ENSG00000164053	ATRIP	chr3	+	48501185	48501315	48500757	48500853	48501508	48502198	26551	20189	0,0	9179	0,14	201	85	0.0185294	1	1.0,1.0	1.0,0.844	0.078
55905	ENSG00000184787	UBE2G2	chr21	-	46194481	46194656	46193462	46193602	46197213	46197332	55905	14203	15145	3160	15211	246	85	0.0185653	1	0.244,0.326	0.065,0.208	0.149
58471	ENSG00000111237	VPS29	chr12	-	110936624	110936664	110933816	110934008	110937261	110937354	58471	1,19	3,18	1,16	5,45	66	85	0.0185706	1	0.3,0.576	0.205,0.314	0.178
62843	ENSG00000089248	ERP29	chr12	+	112457559	112457698	112451119	112451413	112459953	112460972	62843	2342906	46831	1272529	10452	210	85	0.0186333	1	0.673,0.586	0.837,0.694	-0.136
1318	ENSG00000101294	HM13	chr20	+	30155880	30156027	30149436	30149539	30156922	30157370	1318	9,52	2,47	6126	0,46	218	85	0.0186344	1	0.637,0.301	1.0,0.516	-0.289
39189	ENSG00000100796	SMEK1	chr14	-	91932604	91932760	91931593	91931763	91937180	91937339	39189	11,30	11,42	9,40	6,15	227	85	0.0187755	1	0.272,0.211	0.36,0.5	-0.189
62889	ENSG00000159322	ADPGK	chr15	-	73047896	73047995	73044963	73045236	73052747	73052868	62889	3,83	0,16	7123	0,5	170	85	0.0188414	1	1.0,0.722	1.0,0.925	-0.102
53506	ENSG00000106462	EZH2	chr7	-	148543561	148543690	148526819	148526940	148581255	148581375	53506	5108	0,35	15172	0,21	200	85	0.0188666	1	1.0,0.567	1.0,0.777	-0.105
33516	ENSG00000107938	C10orf137	chr10	+	127417571	127417673	127414250	127414407	127417926	127418048	33516	3,41	3,24	2,63	0,12	173	85	0.0188669	1	0.329,0.456	1.0,0.721	-0.468
45945	ENSG00000133872	TMEM66	chr8	-	29931392	29931544	29927389	29927575	29940362	29940590	45945	911529	5280	531165	0,102	223	85	0.0188864	1	0.874,0.675	1.0,0.813	-0.132
17708	ENSG00000101363	MANBAL	chr20	+	35930682	35930726	35929610	35929816	35944710	35945042	17708	0,5	6105	0,28	3118	74	85	0.0189513	1	0.0,0.052	0.0,0.214	-0.081
62024	ENSG00000155329	ZCCHC10	chr5	-	132342450	132342612	132333903	132334542	132362188	132362296	62024	26379	1,75	36410	0,33	233	85	0.0189581	1	0.905,0.648	1.0,0.819	-0.133
42497	ENSG00000144827	ABHD10	chr3	+	111700630	111700814	111697881	111698050	111705760	111705898	42497	20778	2127	20982	1,51	255	85	0.0189603	1	0.769,0.671	0.87,0.865	-0.147
41676	ENSG00000160298	C21orf58	chr21	-	47738698	47738875	47737925	47738134	47742552	47743783	41676	25351	3,54	17469	1,20	248	85	0.0189798	1	0.741,0.69	0.854,0.889	-0.156
11349	ENSG00000138443	ABI2	chr2	+	204259422	204259569	204255768	204255866	204260378	204260503	11349	67852	5,74	32715	0,15	218	85	0.0191403	1	0.839,0.818	1.0,0.949	-0.146
11690	ENSG00000090857	PDPR	chr16	+	70164325	70164447	70162861	70163025	70166053	70166203	11690	6103	1,15	7172	0,5	193	85	0.0191426	1	0.725,0.752	1.0,0.938	-0.231
18825	ENSG00000073921	PICALM	chr11	-	85687665	85687725	85670079	85670103	85692171	85692271	18825	9199	1,27	9285	0,11	53	17	0.0192163	1	0.743,0.703	1.0,0.893	-0.224
15784	ENSG00000158636	C11orf30	chr11	+	76170979	76171129	76169226	76169402	76174864	76175124	15784	16147	3,10	20108	6,29	221	85	0.0192208	1	0.672,0.85	0.562,0.589	0.186
19302	ENSG00000138802	SEC24B	chr4	+	110402832	110402937	110384056	110384800	110412482	110412563	19302	6,74	0,11	6,71	0,0	165	74	0.0192903	1	1.0,0.751	1.0,1.0	-0.125
33723	ENSG00000167302	C17orf56	chr17	-	79206114	79206318	79205646	79205821	79207231	79207303	33723	3,94	1,43	2207	0,32	255	65	0.019397	1	0.433,0.358	1.0,0.622	-0.416
62232	ENSG00000087053	MTMR2	chr11	-	95647405	95647476	95621319	95621425	95657038	95657264	62232	11,97	10133	18112	4,87	128	85	0.019432	1	0.422,0.326	0.749,0.461	-0.231
41206	ENSG00000243209	none_found	chrY	+	21757900	21758020	21755284	21755479	21759476	21759551	41206	4,57	0,9	3,31	0,20	174	68	0.0195633	1	1.0,0.712	1.0,0.377	0.167
38990	ENSG00000214021	TTLL3,ARPC4-TTLL3	chr3	+	9857757	9857886	9854992	9855029	9867483	9867632	38990	4119	1,15	11136	0,3	145	30	0.019567	1	0.453,0.621	1.0,0.904	-0.415
17333	ENSG00000141480	ARRB2	chr17	+	4618307	4618338	4613783	4614039	4619267	4619328	17333	3228	6309	1208	3467	24	54	0.0195794	1	0.529,0.624	0.429,0.501	0.112
68237	ENSG00000138069	RAB1A	chr2	-	65318116	65318212	65313988	65315824	65325104	65325200	68237	22196	4,33	27244	3,11	170	85	0.0196383	1	0.733,0.748	0.818,0.917	-0.127
26951	ENSG00000131374	TBC1D5	chr3	-	17665340	17665405	17603510	17603634	17783972	17784056	26951	3,29	0,2	2,17	1,8	108	77	0.0197087	1	1.0,0.912	0.588,0.602	0.361
46072	ENSG00000184402	SS18L1	chr20	+	60736491	60736636	60734932	60735017	60737807	60737987	46072	8384	0,52	12613	0,23	209	78	0.0198011	1	1.0,0.734	1.0,0.909	-0.088
33777	ENSG00000122515	ZMIZ2	chr7	+	44789413	44789579	44788460	44788590	44795786	44795898	33777	0,9	3,68	2,55	0,113	237	85	0.0200558	1	0.0,0.045	1.0,0.149	-0.552
4896	ENSG00000204130	RUFY2	chr10	-	70156536	70156638	70154084	70154208	70161376	70161494	4896	6,45	0,3	1,41	0,14	173	85	0.0202679	1	1.0,0.881	1.0,0.59	0.146
59973	ENSG00000117305	HMGCL	chr1	-	24137225	24137289	24134624	24134813	24143164	24143260	59973	4,60	2,25	4109	0,17	114	85	0.0202894	1	0.599,0.642	1.0,0.827	-0.293
36857	ENSG00000152683	SLC30A6	chr2	+	32431954	32432002	32422775	32422895	32445281	32446809	36857	1,2	0,0	0,0	1,4	82	85	0.0205751	1	1.0,1.0	0.0,0.0	1
48271	ENSG00000126247	CAPNS1	chr19	+	36631898	36632122	36630917	36631059	36633201	36633235	48271	17481	0,0	2508	0,21	237	27	0.0207839	1	1.0,1.0	1.0,0.734	0.133
36982	ENSG00000197905	TEAD4	chr12	+	3069113	3069206	3068579	3068647	3103903	3104158	36982	27280	4,66	10303	0,29	146	61	0.0207897	1	0.738,0.639	1.0,0.814	-0.219
50754	ENSG00000064115	TM7SF3	chr12	-	27128428	27128591	27126127	27127160	27148169	27148341	50754	1381756	5143	1451379	2,23	234	85	0.0208271	1	0.909,0.817	0.963,0.956	-0.097
27741	ENSG00000144468	RHBDD1	chr2	+	227702788	227702870	227700670	227700803	227729319	227729781	27741	2,1	3,48	1,14	1,43	150	85	0.0208406	1	0.274,0.012	0.362,0.156	-0.116
36006	ENSG00000138399	FASTKD1	chr2	-	170419734	170419860	170413696	170413807	170428162	170428681	36006	4,18	0,7	2,30	0,0	197	85	0.0208713	1	1.0,0.526	1.0,1.0	-0.237
32274	ENSG00000112078	KCTD20	chr6	+	36446897	36447000	36410812	36410888	36449338	36449536	32274	0,37	6153	0,47	2,68	158	69	0.0208906	1	0.0,0.096	0.0,0.232	-0.068
35481	ENSG00000162642	C1orf52	chr1	-	85724617	85724744	85724206	85724405	85725040	85725316	35481	12432	2149	5175	1167	198	85	0.0209661	1	0.72,0.554	0.682,0.31	0.141
43506	ENSG00000141959	PFKL	chr21	+	45730888	45730966	45726563	45726637	45731987	45732177	43506	27793	2,88	181493	0,36	124	67	0.0209919	1	0.879,0.83	1.0,0.957	-0.124
10174	ENSG00000156976	EIF4A2	chr3	+	186502750	186502890	186502352	186502485	186503671	186503840	10174	1693647	351153	1372805	21463	211	85	0.0210189	1	0.66,0.56	0.724,0.709	-0.106
31884	ENSG00000106976	DNM1	chr9	+	131002263	131002275	131002006	131002058	131004510	131004624	31884	0,0	1,38	0,4	2,17	5	45	0.0211876	1	0.0,0.0	0.0,0.679	-0.34
36036	ENSG00000000419	DPM1	chr20	-	49562273	49562299	49558567	49558663	49562383	49562398	36036	3,25	0,2	4,9	2,7	19	8	0.0212266	1	1.0,0.84	0.457,0.351	0.516
12386	ENSG00000076108	BAZ2A	chr12	-	57024559	57024649	57011178	57011316	57029965	57030077	12386	0,23	4,31	1,27	2,11	166	85	0.0213053	1	0.0,0.275	0.204,0.557	-0.243
10494	ENSG00000150433	none_found	chr11	-	124980539	124980642	124972027	124972705	124981434	124981500	10494	0,5	8,64	2,32	2,97	148	59	0.0213956	1	0.0,0.03	0.285,0.116	-0.186
58476	ENSG00000111237	VPS29	chr12	-	110937339	110937351	110933816	110934008	110939853	110939912	58476	17172	22224	9256	9232	5	52	0.0215611	1	0.889,0.889	0.912,0.92	-0.027
1285	ENSG00000000457	SCYL3	chr1	-	169824936	169825098	169823410	169824105	169828181	169828353	1285	0,24	3,26	2,47	1,17	233	85	0.021697	1	0.0,0.252	0.422,0.502	-0.336
4887	ENSG00000103194	USP10	chr16	+	84806146	84806291	84801798	84801964	84812500	84813525	4887	20411	5,39	37364	0,16	216	85	0.0217717	1	0.612,0.806	1.0,0.9	-0.241
37695	ENSG00000015475	BID	chr22	-	18232870	18232940	18222114	18222254	18257146	18257258	37695	21586	23647	7642	6409	126	85	0.0218018	1	0.381,0.379	0.44,0.514	-0.097
25834	ENSG00000136738	STAM	chr10	+	17742189	17742278	17738773	17738868	17746429	17746517	25834	30282	2,35	26229	0,6	160	81	0.0218559	1	0.884,0.803	1.0,0.951	-0.132
2355	ENSG00000184178	SCFD2	chr4	-	54139992	54140168	54011499	54011749	54179802	54179930	2355	4,50	0,6	15135	0,2	247	85	0.0220389	1	1.0,0.741	1.0,0.959	-0.109
49894	ENSG00000101353	C20orf132	chr20	-	35783465	35783570	35776176	35776312	35786262	35786358	49894	0,7	2,11	0,30	1,8	176	85	0.0221265	1	0.0,0.235	0.0,0.644	-0.205
50535	ENSG00000122390	NAA60	chr16	+	3529470	3529600	3507992	3508181	3532501	3532598	50535	8163	0,15	21210	0,2	201	85	0.0221594	1	1.0,0.821	1.0,0.978	-0.079
48550	ENSG00000090621	PABPC4	chr1	-	40029507	40029594	40029285	40029413	40030094	40030214	48550	1321509	15358	681639	5162	160	85	0.0223124	1	0.824,0.691	0.878,0.843	-0.103
2407	ENSG00000146067	FAM193B	chr5	-	176974168	176974229	176965905	176966148	176980168	176980267	2407	1183	7287	1177	4153	108	85	0.0223173	1	0.101,0.334	0.164,0.477	-0.103
40353	ENSG00000170946	DNAJC24	chr11	+	31451029	31451153	31447833	31447902	31451817	31452250	40353	0,5	8,35	2,9	1,15	172	62	0.0224004	1	0.0,0.049	0.419,0.178	-0.274
70000	ENSG00000160691	SHC1	chr1	-	154942507	154942675	154941853	154941924	154946723	154946852	70000	251032	0,13	141322	0,109	218	64	0.0225121	1	1.0,0.959	1.0,0.781	0.089
26931	ENSG00000131374	TBC1D5	chr3	-	17560393	17560487	17549965	17550097	17665340	17665405	26931	2,5	5,33	2,14	1,18	143	58	0.0225385	1	0.14,0.058	0.448,0.24	-0.245
53029	ENSG00000100629	none_found	chr14	-	81424521	81424629	81405728	81405884	81425775	81425845	53029	27782	4,98	8281	0,10	157	63	0.0225403	1	0.73,0.762	1.0,0.919	-0.214
16474	ENSG00000171204	TMEM126B	chr11	+	85342188	85342360	85339648	85339732	85342730	85342852	16474	13252	18135	29421	10133	235	77	0.0225903	1	0.191,0.38	0.487,0.509	-0.213
59763	ENSG00000136891	TEX10	chr9	-	103072580	103072661	103070781	103070963	103082546	103082680	59763	5,74	1,20	7,53	0,3	148	85	0.0226166	1	0.742,0.68	1.0,0.91	-0.244
66610	ENSG00000164620	RELL2	chr5	+	141018521	141018588	141018361	141018427	141019030	141019196	66610	23259	0,30	5259	2,59	94	59	0.0226198	1	1.0,0.844	0.611,0.734	0.249
44858	ENSG00000171757	LRRC34	chr3	-	169513272	169513399	169511260	169511626	169518446	169518542	44858	1,14	0,4	6,27	0,0	198	85	0.0226848	1	1.0,0.6	1.0,1.0	-0.2
49476	ENSG00000196151	WDSUB1	chr2	-	160132056	160132149	160112706	160112886	160136271	160136456	49476	5,10	0,6	10,18	0,0	170	85	0.022852	1	1.0,0.455	1.0,1.0	-0.272
12803	ENSG00000122566	HNRNPA2B1	chr7	-	26230612	26230748	26229744	26230080	26232114	26232197	12803	1291063	0,12	43892	2,51	198	76	0.0231613	1	1.0,0.971	0.892,0.87	0.105
69944	ENSG00000070081	NUCB2	chr11	+	17336932	17337022	17333574	17333667	17351673	17351844	69944	2321273	38539	1191167	15249	166	85	0.0231795	1	0.758,0.547	0.802,0.706	-0.101
10440	ENSG00000137601	NEK1	chr4	-	170520250	170520348	170511876	170511960	170523158	170523255	10440	22,40	0,2	1,34	2,3	162	77	0.0232282	1	1.0,0.905	0.192,0.843	0.435
2240	ENSG00000132716	DCAF8	chr1	-	160231074	160231140	160213749	160213824	160232238	160232318	2240	13235	4199	3183	0,81	89	56	0.023245	1	0.672,0.426	1.0,0.587	-0.244
59900	ENSG00000166526	ZNF3	chr7	-	99677158	99677279	99674925	99675056	99679257	99679326	59900	30317	0,11	13324	4,28	169	62	0.0233405	1	1.0,0.914	0.544,0.809	0.281
3910	ENSG00000112851	ERBB2IP	chr5	+	65364704	65364848	65349233	65350779	65370851	65371058	3910	9,52	16,55	4,32	19,85	215	85	0.023415	1	0.182,0.272	0.077,0.13	0.124
71226	ENSG00000142655	PEX14	chr1	+	10659294	10659423	10596269	10596354	10678388	10678474	71226	12229	0,29	17363	0,11	187	72	0.0235575	1	1.0,0.752	1.0,0.927	-0.088
63225	ENSG00000144504	ANKMY1	chr2	-	241451277	241451418	241446976	241447108	241452218	241452359	63225	2,6	0,17	2,26	0,12	212	85	0.0236223	1	1.0,0.124	1.0,0.465	-0.17
8253	ENSG00000164649	CDCA7L	chr7	-	21951234	21951372	21947818	21948125	21956371	21956512	8253	98882	11550	54646	4202	209	85	0.0236382	1	0.784,0.395	0.846,0.565	-0.116
55721	ENSG00000163697	APBB2	chr4	-	41035252	41035321	41015599	41016415	41067592	41067690	55721	1,34	2,10	4,47	0,3	124	85	0.0237088	1	0.255,0.7	1.0,0.915	-0.48
15152	ENSG00000111832	RWDD1	chr6	+	116894020	116894148	116892582	116892818	116895220	116895334	15152	6103	4121	3,77	10184	199	85	0.0237255	1	0.391,0.267	0.114,0.152	0.196
37496	ENSG00000115827	DCAF17	chr2	+	172314480	172314585	172309633	172309723	172325397	172325540	37496	5138	0,4	5,79	2,12	174	83	0.0237476	1	1.0,0.943	0.544,0.758	0.321
52418	ENSG00000140307	GTF2A2	chr15	-	59942867	59942963	59934412	59934461	59949604	59949674	52418	42307	9,53	52319	1,29	105	20	0.0239333	1	0.471,0.525	0.908,0.677	-0.295
59548	ENSG00000160124	CCDC58	chr3	-	122087022	122087169	122081814	122081874	122102020	122102078	59548	23143	1,8	28202	0,1	152	19	0.0240746	1	0.742,0.691	1.0,0.962	-0.265
69341	ENSG00000088727	KIF9	chr3	-	47318771	47318869	47316814	47316980	47323984	47324337	69341	27,68	0,1	6,59	0,9	170	85	0.0242988	1	1.0,0.971	1.0,0.766	0.103
66972	ENSG00000078403	MLLT10	chr10	+	21971153	21971186	21970260	21970305	22002700	22002879	66972	1,29	0,4	1,8	0,11	26	38	0.0242995	1	1.0,0.914	1.0,0.515	0.2
69151	ENSG00000107263	RAPGEF1	chr9	-	134525515	134525629	134518625	134518804	134526196	134526336	69151	12139	12100	16159	7,59	185	85	0.0243051	1	0.315,0.39	0.512,0.553	-0.18
72826	ENSG00000015479	MATR3	chr5	+	138650363	138650425	138629431	138629494	138651764	138651877	72826	5190	2,97	5203	1,22	81	56	0.0243084	1	0.633,0.575	0.776,0.864	-0.216
6962	ENSG00000224078	none_found	chr15	+	25335058	25335157	25332613	25332746	25336736	25336866	6962	5,34	0,9	5,81	0,3	170	85	0.0244442	1	1.0,0.654	1.0,0.931	-0.139
12131	ENSG00000058272	PPP1R12A	chr12	-	80199945	80200077	80199371	80199548	80201005	80201110	12131	10108	8,53	4,92	2,11	203	85	0.0244697	1	0.344,0.46	0.456,0.778	-0.215
62622	ENSG00000067334	DNTTIP2	chr1	-	94341200	94341339	94338674	94338770	94341823	94343418	62622	27143	0,4	5173	4,2	210	85	0.0245223	1	1.0,0.935	0.336,0.972	0.314
13131	ENSG00000130731	C16orf13	chr16	-	685611	685774	684718	684797	686093	686347	13131	81478	5,13	39699	8,56	221	72	0.0245577	1	0.841,0.923	0.614,0.803	0.174
70381	ENSG00000123600	METTL8	chr2	-	172248552	172248707	172216931	172217023	172291183	172291290	70381	1,17	0,22	1,44	0,14	226	85	0.0246119	1	1.0,0.225	1.0,0.542	-0.158
35145	ENSG00000100099	HPS4	chr22	-	26867178	26867254	26866684	26866779	26868267	26868384	35145	0,9	20171	4,30	17155	138	85	0.0246411	1	0.0,0.031	0.127,0.107	-0.102
15150	ENSG00000111832	RWDD1	chr6	+	116895220	116895334	116892651	116892818	116901457	116901523	15150	11173	15368	16244	13255	159	59	0.0247282	1	0.214,0.149	0.314,0.262	-0.107
25980	ENSG00000147586	MRPS28	chr8	-	80915233	80915415	80831359	80831383	80942288	80942467	25980	19192	0,18	35271	0,6	185	17	0.0247797	1	1.0,0.495	1.0,0.806	-0.155
69642	ENSG00000136933	RABEPK	chr9	+	127975648	127975801	127969842	127970000	127982817	127982979	69642	18376	6,40	23620	1,23	224	85	0.0247933	1	0.532,0.781	0.897,0.911	-0.247
31065	ENSG00000139436	GIT2	chr12	-	110388971	110389121	110385060	110385309	110390896	110391039	31065	23337	1,6	6313	0,29	221	85	0.0248386	1	0.898,0.956	1.0,0.806	0.024
46652	ENSG00000069275	NUCKS1	chr1	-	205696827	205696933	205689628	205689781	205719084	205719404	46652	8153	1,48	5127	0,14	177	85	0.0248432	1	0.793,0.605	1.0,0.813	-0.207
19412	ENSG00000147804	SLC39A4	chr8	-	145638620	145638773	145638142	145638330	145638896	145638951	19412	30606	5,26	32945	7110	187	48	0.024855	1	0.606,0.857	0.54,0.688	0.118
4885	ENSG00000103194	USP10	chr16	+	84808765	84808831	84806146	84806291	84812500	84813525	4885	18283	3,91	26477	3,44	118	85	0.0249757	1	0.812,0.691	0.862,0.886	-0.122
59223	ENSG00000131828	PDHA1	chrX	+	19372608	19372701	19371199	19371291	19373466	19373622	59223	14340	2,20	11332	2,59	170	85	0.0249958	1	0.778,0.895	0.733,0.738	0.101
39030	ENSG00000100325	ASCC2	chr22	-	30221610	30221769	30221149	30221246	30228233	30228331	39030	19661	3,48	391040	0,23	230	85	0.0249964	1	0.701,0.836	1.0,0.944	-0.204
16246	ENSG00000167283	ATP5L	chr11	+	118276371	118276424	118274638	118274700	118277651	118277812	16246	5,36	0,0	1,13	0,3	62	55	0.0251588	1	1.0,1.0	1.0,0.794	0.103
45944	ENSG00000133872	TMEM66	chr8	-	29931392	29931567	29927157	29927575	29940362	29940640	45944	971876	5280	591398	0,102	246	85	0.025163	1	0.87,0.698	1.0,0.826	-0.129
56009	ENSG00000075218	GTSE1	chr22	+	46711928	46712309	46709786	46709910	46719086	46719159	56009	1081887	0,10	731932	2,53	433	66	0.0252383	1	1.0,0.966	0.848,0.847	0.136
41353	ENSG00000125637	PSD4	chr2	+	113956316	113956461	113955326	113955490	113956659	113956803	41353	29662	5151	15962	4404	216	85	0.0254218	1	0.695,0.633	0.596,0.484	0.124
45222	ENSG00000171570	EGLN2	chr19	+	41313042	41313179	41306243	41307320	41313713	41314336	45222	17146	2,21	8204	0,7	208	85	0.025476	1	0.776,0.74	1.0,0.923	-0.204
6833	ENSG00000124588	NQO2	chr6	+	3002283	3002520	3000207	3000319	3006701	3006793	6833	4,29	16226	2165	3132	308	85	0.0255559	1	0.065,0.034	0.155,0.256	-0.156
12865	ENSG00000164818	HEATR2	chr7	+	769299	769484	766337	766952	794225	794458	12865	1171	0,20	7257	0,7	256	85	0.0256124	1	1.0,0.74	1.0,0.924	-0.092
25983	ENSG00000147586	MRPS28	chr8	-	80915233	80915355	80831174	80831383	80942288	80942489	25983	15115	0,18	23189	0,6	193	85	0.0256139	1	1.0,0.738	1.0,0.933	-0.098
47986	ENSG00000112234	FBXL4	chr6	-	99365249	99365595	99353301	99353546	99395681	99395849	47986	14106	1,37	14157	0,0	417	85	0.0256316	1	0.741,0.369	1.0,1.0	-0.445
31030	ENSG00000104388	RAB2A	chr8	+	61484604	61484672	61429494	61429812	61496766	61496849	31030	8,85	0,11	13100	0,0	113	76	0.0257318	1	1.0,0.839	1.0,1.0	-0.081
68365	ENSG00000107447	DNTT	chr10	+	98079018	98079147	98078108	98078283	98080374	98080545	68365	3294624	16248	1743387	1,20	200	85	0.0258185	1	0.897,0.888	0.987,0.986	-0.094
52934	ENSG00000168958	MFF	chr2	+	228193393	228195562	228189980	228190143	228197134	228197304	52934	1401515	8,54	981204	0,17	2240	85	0.0258282	1	0.399,0.516	1.0,0.729	-0.407
72055	ENSG00000177410	none_found	chr20	+	47897021	47897107	47895640	47895745	47905581	47905797	72055	3194180	129817	1882915	41349	158	85	0.0258387	1	0.571,0.734	0.712,0.818	-0.112
59033	ENSG00000143498	TAF1A	chr1	-	222753100	222753214	222750786	222750985	222757469	222757639	59033	5,33	7,15	10,30	0,8	185	85	0.0258908	1	0.247,0.503	1.0,0.633	-0.442
24009	ENSG00000120910	PPP3CC	chr8	+	22396981	22397011	22390433	22390531	22398127	22398569	24009	6,71	1,9	2,56	1,23	46	85	0.0259155	1	0.917,0.936	0.787,0.818	0.124
57550	ENSG00000126777	KTN1	chr14	+	56130672	56130759	56128239	56128330	56133958	56134048	57550	60330	17,96	56399	10,55	157	82	0.0259816	1	0.648,0.642	0.745,0.791	-0.123
40819	ENSG00000076321	KLHL20	chr1	+	173684661	173684793	173684079	173684217	173685141	173685205	40819	3,89	0,9	3,45	0,18	175	57	0.0260117	1	1.0,0.763	1.0,0.449	0.157
38996	ENSG00000149554	CHEK1	chr11	+	125507343	125507439	125505323	125505428	125513686	125513795	38996	52182	5,17	61189	2,2	170	85	0.0260132	1	0.839,0.843	0.938,0.979	-0.117
61315	ENSG00000182944	EWSR1	chr22	+	29687550	29687588	29682911	29683123	29688125	29688158	61315	1,27	0,39	1,36	0,17	31	26	0.0260345	1	1.0,0.367	1.0,0.64	-0.137
39712	ENSG00000113649	TCERG1	chr5	+	145847903	145847966	145843113	145843356	145849106	145849307	39712	6220	35950	13180	24457	112	85	0.0260921	1	0.115,0.149	0.291,0.23	-0.129
40917	ENSG00000240370	none_found	chr12	+	6991359	6991491	6982819	6982945	6992867	6993083	40917	5,15	5,27	1,30	0,15	203	85	0.0261124	1	0.295,0.189	1.0,0.456	-0.486
43921	ENSG00000111364	DDX55	chr12	+	124103215	124103384	124101057	124101150	124103994	124104263	43921	15,87	2,18	6122	0,6	240	85	0.0261633	1	0.726,0.631	1.0,0.878	-0.261
47030	ENSG00000069424	KCNAB2	chr1	+	6078694	6078895	6052770	6052848	6100576	6100705	47030	9,46	14508	7127	1420	258	71	0.0262312	1	0.15,0.024	0.658,0.077	-0.281
34340	ENSG00000100697	DICER1	chr14	-	95597845	95597976	95596394	95596529	95598851	95599014	34340	33172	5,25	39164	3,6	202	85	0.0262386	1	0.735,0.743	0.845,0.92	-0.144
28952	ENSG00000184047	DIABLO	chr12	-	122709191	122709295	122701305	122701416	122710511	122710599	28952	4,39	0,12	1,41	0,1	171	81	0.0262616	1	1.0,0.606	1.0,0.951	-0.173
62790	ENSG00000112290	WASF1	chr6	-	110499800	110499945	110448671	110448832	110500641	110500852	62790	0,35	3,75	5,93	1,91	216	85	0.0262681	1	0.0,0.155	0.663,0.287	-0.397
52421	ENSG00000140307	GTF2A2	chr15	-	59942867	59942972	59934334	59934461	59949604	59949737	52421	51361	9,53	61365	1,29	176	85	0.0262895	1	0.732,0.767	0.967,0.859	-0.163
55897	ENSG00000165355	FBXO33	chr14	-	39870379	39871065	39866872	39868991	39900767	39901704	55897	40488	0,43	65552	0,15	757	85	0.0263543	1	1.0,0.56	1.0,0.805	-0.123
13133	ENSG00000130731	C16orf13	chr16	-	685280	685340	684718	684797	686093	686347	13133	68308	5,13	27453	8,56	93	72	0.0263895	1	0.913,0.948	0.723,0.862	0.138
15146	ENSG00000077935	SMC1B	chr22	-	45750838	45750995	45749857	45750012	45754576	45754675	15146	9,74	0,19	11139	0,8	228	85	0.0264861	1	1.0,0.592	1.0,0.866	-0.137
55410	ENSG00000147443	DOK2	chr8	-	21769411	21769499	21768183	21768368	21771049	21771371	55410	1,62	3,61	2,92	0,41	162	85	0.026509	1	0.149,0.348	1.0,0.541	-0.522
37221	ENSG00000185187	SIGIRR	chr11	-	408694	408893	408072	408206	414822	414999	37221	17186	2,80	7318	0,49	270	85	0.0265115	1	0.728,0.423	1.0,0.671	-0.26
8326	ENSG00000250988	none_found	chr15	+	83425481	83425537	83423380	83423536	83425655	83425691	8326	11,46	5,17	6,34	4,36	49	29	0.0265938	1	0.566,0.616	0.47,0.359	0.177
60025	ENSG00000215114	UBXN2B	chr8	+	59352191	59352329	59329408	59329512	59359947	59364060	60025	0,14	1,14	2,13	0,2	209	85	0.0268067	1	0.0,0.289	1.0,0.726	-0.719
31726	ENSG00000165568	AKR1E2	chr10	+	4883976	4884049	4881920	4882018	4884612	4884696	31726	1,2	1,6	6,14	4,3	124	77	0.0268089	1	0.383,0.171	0.482,0.743	-0.336
51106	ENSG00000183624	C3orf37	chr3	+	129009521	129009647	129007696	129007840	129017196	129017378	51106	51426	2,57	27666	0,19	197	85	0.0268598	1	0.917,0.763	1.0,0.938	-0.129
23643	ENSG00000111358	GTF2H3	chr12	+	124123840	124123890	124118375	124118419	124130001	124130108	23643	5,81	1,37	6131	0,26	43	37	0.0268598	1	0.811,0.653	1.0,0.813	-0.175
43739	ENSG00000129173	E2F8	chr11	-	19256290	19256605	19255906	19256068	19258860	19259017	43739	1071048	3,44	58896	0,5	386	85	0.0268653	1	0.887,0.84	1.0,0.975	-0.124
54973	ENSG00000088832	FKBP1A	chr20	-	1373477	1373525	1356134	1356247	1373605	1373672	54973	341066	2,49	291375	13145	57	60	0.0268824	1	0.947,0.958	0.701,0.909	0.147
52073	ENSG00000076043	REXO2	chr11	+	114314577	114314655	114311392	114311461	114320567	114320761	52073	14394	2,35	9592	0,7	119	62	0.026889	1	0.785,0.854	1.0,0.978	-0.169
3486	ENSG00000101966	XIAP	chrX	+	123019480	123020389	122993661	122993755	123022468	123022568	3486	98562	1,77	81507	0,23	980	85	0.0269002	1	0.895,0.388	1.0,0.657	-0.187
42166	ENSG00000160752	FDPS	chr1	+	155289647	155289719	155289401	155289479	155290199	155290456	42166	33012838	21842	613530	19352	116	71	0.0269144	1	0.906,0.903	0.663,0.86	0.143
45823	ENSG00000123472	ATPAF1	chr1	-	47110832	47110928	47101568	47101642	47118252	47118300	45823	9,29	4,16	9,43	1,5	108	23	0.0269645	1	0.324,0.278	0.657,0.647	-0.351
55138	ENSG00000170791	CHCHD7	chr8	+	57125320	57125468	57124347	57124396	57127156	57127226	55138	51420	18193	46879	12133	154	20	0.0270094	1	0.269,0.22	0.332,0.462	-0.153
21169	ENSG00000166226	CCT2	chr12	+	69979530	69979789	69979239	69979304	69980049	69980124	21169	10271	401235	0,74	441642	286	41	0.0270222	1	0.035,0.03	0.0,0.006	0.03
69762	ENSG00000178177	LCORL	chr4	-	17887690	17887784	17844838	17847524	17910716	17910968	69762	16,97	28100	9,97	10,47	170	85	0.0270443	1	0.222,0.327	0.31,0.508	-0.135
2234	ENSG00000132716	DCAF8	chr1	-	160231074	160231148	160213749	160213824	160232238	160232321	2234	15273	4199	3214	0,81	108	59	0.0270774	1	0.672,0.428	1.0,0.591	-0.245
62785	ENSG00000112290	WASF1	chr6	-	110481837	110481935	110448671	110448832	110499800	110499945	62785	3,50	0,8	1,33	0,18	170	85	0.0273183	1	1.0,0.758	1.0,0.478	0.14
49650	ENSG00000178537	SLC25A20	chr3	-	48895939	48896064	48894824	48895205	48899974	48900092	49650	3,54	0,12	2,54	0,1	196	85	0.0273184	1	1.0,0.661	1.0,0.959	-0.149
38539	ENSG00000174718	C12orf35	chr12	+	32140172	32140256	32123122	32123290	32145311	32146039	38539	40200	3,27	19194	0,5	154	85	0.0273619	1	0.88,0.803	1.0,0.955	-0.136
14364	ENSG00000160216	AGPAT3	chr21	+	45323837	45323900	45285066	45285226	45379514	45379740	14364	2,40	0,24	6113	0,28	112	85	0.0273665	1	1.0,0.558	1.0,0.754	-0.098
50152	ENSG00000143033	MTF2	chr1	+	93592788	93592856	93584889	93584958	93599259	93599365	50152	1,61	1,11	2,37	0,0	99	62	0.0273714	1	0.385,0.776	1.0,1.0	-0.42
60921	ENSG00000018510	AGPS	chr2	+	178333143	178333252	178326620	178326746	178346786	178346914	60921	16272	2,22	16377	0,4	180	85	0.027403	1	0.791,0.854	1.0,0.978	-0.166
45737	ENSG00000088808	PPP1R13B	chr14	-	104230199	104230816	104223986	104224088	104245081	104245158	45737	0,6	5,25	6,43	3,28	673	70	0.0274335	1	0.0,0.024	0.172,0.138	-0.143
63178	ENSG00000168904	LRRC28	chr15	+	99874222	99874334	99828018	99828156	99901540	99901714	63178	6,37	0,0	2,8	0,2	183	85	0.0274928	1	1.0,1.0	1.0,0.65	0.175
41461	ENSG00000132953	XPO4	chr13	-	21381595	21381773	21374969	21375129	21382574	21382720	41461	8106	0,22	26,90	1,4	249	85	0.0275193	1	1.0,0.622	0.899,0.885	-0.081
9656	ENSG00000166004	KIAA1731	chr11	+	93455119	93455216	93454477	93454578	93456206	93456455	9656	9126	4,14	16157	0,5	170	85	0.0276615	1	0.529,0.818	1.0,0.94	-0.297
34595	ENSG00000058673	ZC3H11A	chr1	+	203765420	203765624	203764826	203764903	203770702	203770756	34595	351105	3,34	721238	0,11	222	32	0.0277017	1	0.627,0.824	1.0,0.942	-0.245
14851	ENSG00000110881	ACCN2	chr12	+	50470750	50470832	50453541	50453737	50470995	50471146	14851	1,37	6126	1,92	1144	150	85	0.02772	1	0.086,0.143	0.362,0.266	-0.2
17053	ENSG00000179195	ZNF664,ZNF664-FAM101A	chr12	+	124472589	124472685	124458432	124458567	124495927	124495988	17053	12247	1107	25289	2,50	139	54	0.0279363	1	0.823,0.473	0.829,0.692	-0.113
42638	ENSG00000175322	ZNF519	chr18	-	14124348	14124475	14099941	14106408	14132273	14132489	42638	12115	2,47	5218	0,22	198	85	0.0279921	1	0.72,0.512	1.0,0.81	-0.289
52778	ENSG00000134758	RNF138	chr18	+	29703480	29703537	29672652	29672849	29706655	29706763	52778	1,27	0,16	5,18	0,2	100	85	0.0279958	1	1.0,0.589	1.0,0.884	-0.147
31522	ENSG00000132950	ZMYM5	chr13	-	20412839	20413125	20409616	20409829	20425494	20425936	31522	5,58	0,24	9,88	1,9	357	85	0.0280288	1	1.0,0.365	0.682,0.7	-0.009
52951	ENSG00000168958	MFF	chr2	+	228195341	228195562	228189974	228190143	228197134	228197304	52951	108715	8,54	70540	0,17	292	85	0.0281676	1	0.797,0.794	1.0,0.902	-0.155
25968	ENSG00000185485	none_found	chr3	-	195687170	195687294	195686618	195686957	195690170	195690292	25968	6,40	0,20	0,24	2,27	195	85	0.0282193	1	1.0,0.466	0.0,0.279	0.593
39588	ENSG00000102974	CTCF	chr16	+	67645853	67646024	67605050	67605167	67650647	67650781	39588	48857	2,99	40659	0,28	242	85	0.0283001	1	0.894,0.753	1.0,0.892	-0.122
40930	ENSG00000116191	RALGPS2	chr1	+	178802558	178802685	178790746	178790839	178846632	178846770	40930	6,72	0,0	6,37	3,4	198	85	0.0283056	1	1.0,1.0	0.462,0.799	0.369
12898	ENSG00000163626	COX18	chr4	-	73933745	73933850	73930966	73931130	73935033	73935443	12898	3,51	0,9	8,96	0,3	176	85	0.028309	1	1.0,0.732	1.0,0.939	-0.104
30739	ENSG00000138592	USP8	chr15	+	50724534	50724696	50716576	50716711	50731205	50731374	30739	2,14	4,57	5,38	3,50	233	85	0.0283477	1	0.154,0.082	0.378,0.217	-0.18
62865	ENSG00000083457	ITGAE	chr17	-	3626581	3626677	3623600	3623696	3626981	3627038	62865	18263	31344	6181	22469	135	50	0.0284577	1	0.177,0.221	0.092,0.125	0.091
54259	ENSG00000115419	GLS	chr2	+	191819480	191819544	191819309	191819386	191827555	191827884	54259	11,60	0,0	4,64	0,9	99	70	0.028622	1	1.0,1.0	1.0,0.834	0.083
27845	ENSG00000118961	C2orf43	chr2	-	21001051	21001225	20990014	20990158	21022796	21022849	27845	13111	0,0	12124	0,10	206	46	0.0287166	1	1.0,1.0	1.0,0.735	0.133
69607	ENSG00000198169	ZNF251	chr8	-	145980080	145980220	145979576	145979706	145980789	145980824	69607	6106	0,0	3145	2,10	154	28	0.0287581	1	1.0,1.0	0.214,0.725	0.531
33446	ENSG00000040933	INPP4A	chr2	+	99175925	99175958	99172015	99172271	99179927	99180100	33446	4268	5154	7168	3,54	52	85	0.0288513	1	0.567,0.74	0.792,0.836	-0.161
53494	ENSG00000106462	EZH2	chr7	-	148533913	148534092	148529725	148529842	148543561	148543690	53494	7150	31243	1,74	31249	250	85	0.0290519	1	0.071,0.173	0.011,0.092	0.071
17590	ENSG00000007392	LUC7L	chr16	-	278331	278401	277240	277335	279277	279373	17590	6223	3,98	1273	0,56	126	85	0.0291603	1	0.574,0.606	1.0,0.767	-0.294
13515	ENSG00000170364	SETMAR	chr3	+	4354581	4354913	4345054	4345210	4355350	4355445	13515	4,52	0,4	8110	0,0	403	85	0.0292219	1	1.0,0.733	1.0,1.0	-0.133
73238	ENSG00000053254	FOXN3	chr14	-	89656727	89656793	89647102	89647150	89747293	89747358	73238	5,48	10,93	7,58	10,38	47	14	0.0292702	1	0.13,0.133	0.173,0.313	-0.111
61811	ENSG00000175198	PCCA	chr13	+	100755136	100755214	100741368	100741479	100764094	100764142	61811	2,13	0,5	0,49	1,1	98	41	0.0292873	1	1.0,0.521	0.0,0.953	0.284
13503	ENSG00000139618	BRCA2	chr13	+	32918694	32918790	32910401	32915333	32920963	32921033	13503	6,23	1,2	4,9	1,8	148	63	0.0293098	1	0.719,0.83	0.63,0.324	0.298
259	ENSG00000134352	IL6ST	chr5	-	55250637	55250820	55248077	55248179	55251852	55252063	259	12102	0,9	13119	0,0	254	85	0.0294459	1	1.0,0.791	1.0,1.0	-0.105
27256	ENSG00000197603	C5orf42	chr5	-	37157414	37157522	37154006	37154095	37157771	37158034	27256	2,39	0,18	8,61	1,8	176	82	0.0294916	1	1.0,0.502	0.788,0.78	-0.033
47205	ENSG00000101266	CSNK2A1	chr20	-	489094	489304	485761	485873	524315	524340	47205	371698	1,48	651442	1,12	214	18	0.029536	1	0.757,0.748	0.845,0.91	-0.125
71555	ENSG00000117523	PRRC2C	chr1	+	171560290	171560339	171557517	171557644	171560725	171561362	71555	11174	4121	3139	7144	84	85	0.0297016	1	0.736,0.593	0.302,0.494	0.266
69409	ENSG00000182511	FES	chr15	+	91436883	91437041	91436520	91436644	91437165	91437288	69409	115425	2,13	34822	8,52	229	85	0.0297357	1	0.955,0.924	0.612,0.854	0.207
38649	ENSG00000125319	C17orf53	chr17	+	42230004	42230145	42225225	42226395	42239238	42239844	38649	1,11	1,8	1,17	0,1	212	85	0.0297774	1	0.286,0.355	1.0,0.872	-0.615
1203	ENSG00000144357	UBR3	chr2	+	170870350	170870482	170865349	170865450	170871790	170871876	1203	4,9	3,35	1,0	8,24	197	79	0.0298414	1	0.348,0.093	0.048,0.0	0.196
60387	ENSG00000164219	PGGT1B	chr5	-	114566672	114566718	114557520	114557705	114572086	114572219	60387	6,25	0,10	7,14	6,12	78	85	0.0298649	1	1.0,0.731	0.56,0.56	0.305
17055	ENSG00000179195	ZNF664,ZNF664-FAM101A	chr12	+	124472592	124472685	124458432	124458567	124495927	124495988	17055	10310	1107	21307	2,50	139	54	0.0298879	1	0.795,0.53	0.803,0.705	-0.091
9681	ENSG00000133739	LRRCC1	chr8	+	86021829	86022035	86019381	86019634	86022349	86022415	9681	4,93	0,47	8167	1,23	251	59	0.0299193	1	1.0,0.317	0.653,0.631	0.016
24250	ENSG00000126001	CEP250	chr20	+	34046124	34046195	34042995	34043058	34047802	34047925	24250	9,86	0,0	3,55	0,6	99	56	0.0299521	1	1.0,1.0	1.0,0.838	0.081
57765	ENSG00000204397	CASP1,CARD16	chr11	-	104914209	104914272	104912297	104912446	104915118	104915385	57765	10,21	5,15	3,14	3,30	112	85	0.0300382	1	0.603,0.515	0.431,0.262	0.212
47128	ENSG00000168803	ADAL	chr15	+	43639213	43639294	43638051	43638178	43641104	43641243	47128	11,64	2,1	5,26	1,16	148	85	0.0300929	1	0.76,0.974	0.742,0.483	0.254
34779	ENSG00000159140	SON	chr21	+	34921781	34927697	34918518	34918685	34929461	34929622	34779	194042359	3,93	135638860	0,8	5987	85	0.0303607	1	0.902,0.866	1.0,0.986	-0.109
18236	ENSG00000118482	PHF3	chr6	+	64388728	64388921	64356431	64356700	64389900	64390062	18236	1,13	24,90	1,22	14,29	264	85	0.0305123	1	0.013,0.044	0.022,0.196	-0.081
43825	ENSG00000103426	CORO7-PAM16,CORO7	chr16	-	4457562	4457685	4455491	4455568	4462356	4462431	43825	4,69	0,11	1125	0,3	162	53	0.0305399	1	1.0,0.672	1.0,0.932	-0.13
59897	ENSG00000166526	ZNF3	chr7	-	99677162	99677279	99674925	99675056	99679257	99679371	59897	24237	0,11	11263	4,28	188	85	0.0305846	1	1.0,0.907	0.554,0.809	0.272
787	ENSG00000165304	MELK	chr9	+	36642993	36643080	36633098	36633197	36651742	36651874	787	70307	15,89	55295	9,36	160	85	0.0305856	1	0.713,0.647	0.765,0.813	-0.109
36424	ENSG00000136811	ODF2	chr9	+	131219476	131219716	131218431	131218534	131221845	131221936	36424	27261	36345	2164	26338	310	84	0.0306929	1	0.169,0.17	0.02,0.116	0.102
64376	ENSG00000180815	MAP3K15	chrX	-	19398237	19398395	19392594	19392778	19410119	19410225	64376	0,74	2,9	6,76	0,2	229	85	0.0307184	1	0.0,0.753	1.0,0.934	-0.591
29207	ENSG00000083642	PDS5B	chr13	+	33344791	33344899	33344258	33344698	33347326	33347462	29207	32456	1,57	27548	0,7	179	85	0.03077	1	0.938,0.792	1.0,0.974	-0.122
54019	ENSG00000143756	FBXO28	chr1	+	224321775	224321914	224318173	224318283	224340843	224341039	54019	8,86	0,21	19102	1,6	210	85	0.030809	1	1.0,0.624	0.885,0.873	-0.067
45973	ENSG00000127419	TMEM175	chr4	+	941496	941680	926248	926328	944208	944306	45973	15350	3,20	6622	1,94	243	73	0.0308217	1	0.6,0.84	0.643,0.665	0.066
55472	ENSG00000078142	PIK3C3	chr18	+	39637846	39638015	39629494	39629569	39644703	39644794	55472	6,79	1,11	10107	0,3	222	67	0.0309369	1	0.644,0.684	1.0,0.915	-0.294
19076	ENSG00000138430	OLA1	chr2	-	174988322	174988403	174946737	174946792	175087760	175087888	19076	2,23	3,9	5,11	0,0	111	48	0.0310045	1	0.224,0.525	1.0,1.0	-0.626
27661	ENSG00000121741	ZMYM2	chr13	+	20636985	20637111	20635192	20635364	20638590	20638685	27661	29305	4,23	24344	0,5	197	85	0.0311087	1	0.758,0.851	1.0,0.967	-0.179
27710	ENSG00000125944	HNRNPR	chr1	-	23660010	23660124	23650048	23650225	23664246	23664354	27710	1202119	17189	652159	2,79	185	85	0.0311245	1	0.764,0.837	0.937,0.926	-0.131
56493	ENSG00000130755	GMFG	chr19	-	39825900	39825950	39823716	39823766	39826613	39826726	56493	5,64	2,22	2,36	2,28	44	43	0.0311994	1	0.71,0.74	0.494,0.557	0.199
26948	ENSG00000131374	TBC1D5	chr3	-	17665340	17665405	17549965	17550097	17783972	17784056	26948	8,62	2,23	3,35	2,30	108	77	0.0312319	1	0.74,0.658	0.517,0.454	0.214
40596	ENSG00000151012	SLC7A11	chr4	-	139106274	139106398	139104355	139104459	139135738	139135783	40596	3,18	0,9	4,30	2,0	148	38	0.0312791	1	1.0,0.339	0.339,1.0	0
66759	ENSG00000231607	none_found	chr13	-	50619241	50619368	50618656	50618904	50623719	50623798	66759	10,62	9,18	8,28	30,16	185	72	0.0313056	1	0.302,0.573	0.094,0.405	0.188
31950	ENSG00000144231	POLR2D	chr2	-	128610498	128610679	128604272	128605759	128615601	128615731	31950	481305	5157	531748	1102	252	85	0.0314607	1	0.764,0.737	0.947,0.853	-0.149
3884	ENSG00000083635	NUFIP1	chr13	-	45533515	45533709	45523856	45523973	45539978	45540071	3884	12119	0,1	5,98	0,9	265	85	0.0315007	1	1.0,0.974	1.0,0.777	0.098
65803	ENSG00000109674	NEIL3	chr4	+	178260936	178261011	178257261	178257475	178274461	178274882	65803	45306	7,67	30347	3,14	136	85	0.0315402	1	0.801,0.741	0.862,0.939	-0.129
5412	ENSG00000104325	DECR1	chr8	+	91029430	91029554	91013673	91013789	91031136	91031194	5412	25159	3,21	25225	1,9	161	51	0.0315504	1	0.725,0.706	0.888,0.888	-0.173
3871	ENSG00000037474	NSUN2	chr5	-	6622128	6622213	6620218	6620411	6623326	6623398	3871	6255	1,23	19356	0,6	136	65	0.0316257	1	0.741,0.841	1.0,0.966	-0.192
43687	ENSG00000205629	LCMT1	chr16	+	25162874	25162936	25151491	25151568	25175918	25176039	43687	14,69	5,29	6,76	0,13	95	70	0.0316462	1	0.674,0.637	1.0,0.812	-0.251
27653	ENSG00000138646	HERC5	chr4	+	89408219	89408330	89400503	89400658	89410316	89410487	27653	13,75	2,27	8,45	0,4	182	85	0.03166	1	0.752,0.565	1.0,0.84	-0.261
54809	ENSG00000180098	TRNAU1AP	chr1	+	28887624	28887772	28887144	28887244	28887857	28887910	54809	5,55	6,40	2,33	8,67	180	46	0.0317253	1	0.176,0.26	0.06,0.112	0.132
47131	ENSG00000168803	ADAL	chr15	+	43643138	43643239	43641104	43641243	43643948	43646094	47131	14,71	0,1	4,51	2,6	172	85	0.0318375	1	1.0,0.972	0.497,0.808	0.333
23038	ENSG00000196177	ACADSB	chr10	+	124797262	124797363	124793871	124794031	124799981	124800173	23038	1,25	3,15	3,28	0,5	172	85	0.0319919	1	0.141,0.452	1.0,0.735	-0.571
10467	ENSG00000083093	PALB2	chr16	-	23625324	23625412	23619184	23619333	23632682	23632799	10467	6,29	0,7	10,49	0,1	162	85	0.0320778	1	1.0,0.685	1.0,0.963	-0.139
39453	ENSG00000139505	MTMR6	chr13	-	25828522	25828572	25827901	25828102	25831333	25831459	39453	6,9	1,8	5,21	0,3	86	85	0.0320859	1	0.856,0.526	1.0,0.874	-0.246
1401	ENSG00000103145	HCFC1R1	chr16	-	3073474	3073531	3073233	3073362	3074181	3074287	1401	26102	0,7	13161	5,21	100	85	0.0320898	1	1.0,0.925	0.688,0.867	0.185
26322	ENSG00000125304	TM9SF2	chr13	+	100189992	100190117	100188861	100188991	100192967	100193047	26322	24204	1,17	21221	0,2	184	73	0.0321994	1	0.905,0.826	1.0,0.978	-0.124
18425	ENSG00000159110	IFNAR2	chr21	+	34614190	34614282	34602445	34602521	34617255	34617379	18425	3151	1,61	12110	4,11	154	69	0.0322073	1	0.573,0.526	0.573,0.818	-0.146
27246	ENSG00000197603	C5orf42	chr5	-	37157414	37157564	37153529	37154095	37157771	37157970	27246	1,22	0,19	3,39	1,8	221	85	0.0323091	1	1.0,0.308	0.536,0.652	0.06
7065	ENSG00000131115	ZNF227	chr19	+	44721943	44722005	44717242	44717397	44732598	44732725	7065	2,33	0,23	0,22	4,31	110	85	0.032326	1	1.0,0.526	0.0,0.354	0.586
756	ENSG00000204576	PRR3	chr6	+	30529104	30529285	30525090	30525227	30529610	30529901	756	14109	4114	5101	10193	252	85	0.0324157	1	0.541,0.244	0.144,0.15	0.246
3229	ENSG00000137449	CPEB2	chr4	+	15009961	15010051	15008928	15009210	15018811	15018902	3229	1,14	0,5	1,4	1,10	165	84	0.0324751	1	1.0,0.588	0.337,0.169	0.541
64096	ENSG00000119522	DENND1A	chr9	-	126150008	126150137	126145933	126146192	126165680	126165769	64096	3,45	11119	0,0	2,38	197	82	0.0326112	1	0.102,0.136	0.0,0.0	0.119
14746	ENSG00000119318	RAD23B	chr9	+	110062421	110062503	110045596	110045976	110068659	110068928	14746	26312	1,56	18309	0,13	150	85	0.0326656	1	0.936,0.759	1.0,0.931	-0.118
63645	ENSG00000138018	EPT1	chr2	+	26597907	26598016	26596234	26596497	26606166	26606215	63645	6,35	2,10	10,38	0,2	137	42	0.0327902	1	0.479,0.518	1.0,0.853	-0.428
59027	ENSG00000143498	TAF1A	chr1	-	222753100	222753167	222750786	222750985	222757469	222757639	59027	2,18	7,15	5,14	0,8	120	85	0.0327968	1	0.168,0.459	1.0,0.553	-0.463
48290	ENSG00000074054	CLASP1	chr2	-	122166599	122166623	122165046	122165291	122168441	122168545	48290	0,13	5118	0,23	4,65	34	85	0.0328192	1	0.0,0.216	0.0,0.469	-0.127
43429	ENSG00000196498	NCOR2	chr12	-	124858958	124859009	124856567	124857156	124862782	124862930	43429	9106	28285	2158	6234	88	85	0.0328886	1	0.237,0.264	0.244,0.395	-0.069
67982	ENSG00000125952	MAX	chr14	-	65544061	65544146	65541844	65543381	65544630	65544754	67982	13171	14266	6166	20439	156	85	0.0329081	1	0.336,0.259	0.14,0.171	0.142
42183	ENSG00000160752	FDPS	chr1	+	155289584	155289719	155289401	155289479	155290199	155290456	42183	60222634	21842	1366070	19352	192	71	0.03295	1	0.914,0.909	0.726,0.864	0.117
23367	ENSG00000101452	DHX35	chr20	+	37601201	37601294	37597723	37597857	37612341	37612419	23367	5111	1,40	3,99	0,13	156	71	0.0329639	1	0.695,0.558	1.0,0.776	-0.261
622	ENSG00000133612	AGAP3	chr7	+	150817606	150817832	150817073	150817232	150820880	150820937	622	1,17	9105	6,65	8114	262	50	0.0330109	1	0.021,0.03	0.125,0.098	-0.086
47476	ENSG00000197622	CDC42SE1	chr1	-	151029126	151029262	151028152	151028469	151031954	151032125	47476	3,91	36592	5271	31671	207	85	0.0330506	1	0.033,0.059	0.062,0.142	-0.056
3962	ENSG00000064961	HMG20B	chr19	+	3575537	3575658	3574554	3574584	3576550	3576623	3962	77961	1,0	32950	0,9	111	4	0.0330509	1	0.735,1.0	1.0,0.792	-0.029
22107	ENSG00000134283	PPHLN1	chr12	+	42748962	42749024	42729684	42729776	42768664	42768876	22107	15107	2,21	8150	0,7	110	85	0.0331079	1	0.853,0.797	1.0,0.943	-0.147
35408	ENSG00000170448	NFXL1	chr4	-	47864862	47864932	47857075	47857180	47877143	47877310	35408	10,98	0,0	9103	1,11	126	85	0.0331488	1	1.0,1.0	0.859,0.863	0.139
19249	ENSG00000156858	PRR14	chr16	+	30665949	30666535	30665550	30665660	30666671	30666741	19249	61987	0,13	48952	1,38	635	63	0.0333018	1	1.0,0.883	0.826,0.713	0.172
29093	ENSG00000125124	BBS2	chr16	-	56534765	56534937	56533689	56533819	56535264	56535409	29093	19414	1,24	45429	0,4	243	85	0.0334394	1	0.869,0.858	1.0,0.974	-0.124
37930	ENSG00000060237	WNK1	chr12	+	988738	989197	987377	987527	989886	989980	37930	4162	2,30	4,59	6,30	530	85	0.0334995	1	0.243,0.464	0.097,0.24	0.185
29484	ENSG00000151332	MBIP	chr14	-	36774294	36774510	36769990	36770029	36777297	36777395	29484	0,7	2,11	1,39	5,3	234	32	0.0335651	1	0.0,0.08	0.027,0.64	-0.294
8300	ENSG00000092208	GEMIN2	chr14	+	39602864	39602923	39601161	39601272	39605643	39605745	8300	15,82	1,3	7,69	5,10	104	85	0.0336916	1	0.925,0.957	0.534,0.849	0.25
6990	ENSG00000224078	none_found	chr15	+	25319038	25319198	25317871	25318010	25320881	25321013	6990	3,26	7,72	4128	7,97	231	85	0.0337367	1	0.136,0.117	0.174,0.327	-0.124
56883	ENSG00000104154	SLC30A4	chr15	-	45779724	45779830	45778808	45778943	45781038	45781240	56883	10,77	0,9	11,87	0,0	177	85	0.0339303	1	1.0,0.804	1.0,1.0	-0.098
61449	ENSG00000168502	CCDC165	chr18	+	8809445	8809559	8806890	8807058	8812976	8813231	61449	4,57	2,41	2141	0,46	185	85	0.0340236	1	0.479,0.39	1.0,0.585	-0.358
30413	ENSG00000008869	HEATR5B	chr2	-	37217790	37217942	37215788	37216002	37227728	37227956	30413	5,69	0,7	7,85	0,0	223	85	0.0340476	1	1.0,0.79	1.0,1.0	-0.105
58657	ENSG00000134109	EDEM1	chr3	+	5251859	5251933	5249777	5249948	5252804	5252901	58657	3423127	11579	2722933	2,98	134	85	0.0341853	1	0.952,0.774	0.989,0.95	-0.107
65112	ENSG00000153250	RBMS1	chr2	-	161138767	161138815	161137824	161137875	161141285	161141379	65112	1,20	0,25	2,18	5,51	41	44	0.0342486	1	1.0,0.462	0.3,0.275	0.444
5708	ENSG00000148362	C9orf142	chr9	+	139887091	139887426	139886942	139887014	139887504	139887695	5708	1341076	2,48	31920	4,69	386	65	0.0343161	1	0.919,0.791	0.566,0.692	0.226
40687	ENSG00000165490	C11orf82	chr11	+	82639818	82639980	82625764	82625893	82642773	82642864	40687	15,40	0,12	8,47	0,1	232	84	0.0344155	1	1.0,0.547	1.0,0.944	-0.198
64024	ENSG00000100241	SBF1	chr22	-	50895462	50895540	50894920	50895102	50897683	50897821	64024	26428	15482	25695	12380	142	85	0.0344624	1	0.509,0.347	0.555,0.523	-0.111
45996	ENSG00000134982	APC	chr5	+	112159003	112159057	112157645	112157688	112162804	112162944	45996	1,11	8,66	4,12	3,29	47	36	0.0345113	1	0.087,0.113	0.505,0.241	-0.273
53156	ENSG00000115355	CCDC88A	chr2	-	55530204	55530288	55529007	55529208	55535944	55536159	53156	23131	4,87	28160	2,56	154	85	0.0345151	1	0.76,0.454	0.885,0.612	-0.141
14564	ENSG00000141441	FAM59A	chr18	-	29866993	29868166	29850179	29850346	29890155	29890286	14564	23339	0,0	32161	0,5	1244	85	0.0345463	1	1.0,1.0	1.0,0.688	0.156
33766	ENSG00000183291	2015-09-15	chr1	-	87333735	87333785	87328983	87329288	87346344	87346408	33766	70350	6,29	52353	13,66	58	57	0.0345921	1	0.92,0.922	0.797,0.84	0.103
50874	ENSG00000113971	NPHP3	chr3	-	132418196	132418294	132416103	132416206	132418761	132418905	50874	5,10	0,14	0,6	3,20	170	85	0.0346289	1	1.0,0.263	0.0,0.13	0.567
18738	ENSG00000101019	UQCC	chr20	-	33961986	33962059	33934549	33935075	33969720	33969828	18738	6147	0,22	8155	0,4	132	85	0.0346298	1	1.0,0.811	1.0,0.961	-0.075
25799	ENSG00000068745	IP6K2	chr3	-	48752747	48752960	48732601	48732851	48754589	48754649	25799	2119	221120	6395	141170	252	53	0.034638	1	0.019,0.022	0.083,0.066	-0.054
35078	ENSG00000087460	GNAS	chr20	+	57473995	57474040	57470666	57470739	57478582	57478640	35078	5317	13520	2542	5465	23	32	0.0346571	1	0.349,0.459	0.358,0.619	-0.084
51191	ENSG00000145819	ARHGAP26	chr5	+	142587008	142587038	142586762	142586873	142593561	142593653	51191	1,8	5,29	0,1	4,31	46	85	0.0346664	1	0.27,0.338	0.0,0.056	0.276
44353	ENSG00000171466	ZNF562	chr19	-	9770054	9770143	9768684	9768811	9785690	9785776	44353	2,11	1,10	8,23	0,6	158	79	0.0346893	1	0.5,0.355	1.0,0.657	-0.401
25731	ENSG00000188290	HES4	chr1	-	935071	935167	934905	934993	935245	935491	25731	44333	10,56	17463	8144	166	81	0.0347438	1	0.682,0.744	0.509,0.611	0.153
5070	ENSG00000157557	ETS2	chr21	+	40178374	40178732	40177874	40178044	40181958	40182030	5070	9215	5338	0,150	16461	409	65	0.0348821	1	0.222,0.092	0.0,0.049	0.133
39552	ENSG00000128708	HAT1	chr2	+	172809398	172809519	172782046	172782151	172821858	172822038	39552	35196	6,25	28239	2,9	192	85	0.0349728	1	0.721,0.776	0.861,0.922	-0.143
6867	ENSG00000256632	PXMP2	chr12	+	133281204	133281380	133266848	133266962	133291443	133291622	6867	37187	2,57	16283	0,37	247	85	0.0350628	1	0.864,0.53	1.0,0.725	-0.165
56824	ENSG00000177853	ZNF518A	chr10	+	97894926	97895046	97893339	97893405	97911172	97911323	56824	1,10	0,8	0,1	1,11	165	59	0.0351494	1	1.0,0.309	0.0,0.031	0.639
49440	ENSG00000035681	NSMAF	chr8	-	59549792	59549948	59548026	59548105	59555542	59555632	49440	4,11	5,23	0,2	9,22	212	70	0.0354085	1	0.209,0.136	0.0,0.029	0.158
70349	ENSG00000198814	GK	chrX	+	30745582	30745669	30742217	30742298	30746848	30748725	70349	16,89	0,8	4,66	1,17	149	74	0.0354664	1	1.0,0.847	0.665,0.658	0.262
49903	ENSG00000121897	LIAS	chr4	+	39469137	39469266	39462409	39462582	39471638	39471784	49903	1,31	0,6	3,34	0,0	200	85	0.035618	1	1.0,0.687	1.0,1.0	-0.156
65050	ENSG00000006740	ARHGAP44	chr17	+	12877405	12877627	12862033	12862214	12883374	12883550	65050	13,88	0,1	3122	0,13	293	85	0.0356777	1	1.0,0.962	1.0,0.731	0.116
18902	ENSG00000110148	CCKBR	chr11	+	6285703	6285863	6281155	6281309	6290898	6291047	18902	0,0	5,60	0,15	1,76	231	85	0.0358085	1	0.0,0.0	0.0,0.068	-0.034
25676	ENSG00000164221	CCDC112	chr5	-	114605399	114605495	114604578	114604697	114606909	114607323	25676	6,21	9,39	9,17	1,16	170	85	0.0358598	1	0.25,0.212	0.818,0.347	-0.352
54728	ENSG00000107779	BMPR1A	chr10	+	88603162	88603267	88598695	88598736	88635623	88635842	54728	0,0	12,20	3,6	4,20	125	34	0.0359152	1	0.0,0.0	0.169,0.075	-0.122
35304	ENSG00000168944	CEP120	chr5	-	122758643	122758724	122754052	122754209	122759202	122759238	35304	5111	1,20	4119	0,6	92	29	0.0359685	1	0.612,0.636	1.0,0.862	-0.307
6587	ENSG00000213865	C8orf44-SGK3,C8orf44	chr8	+	67588979	67589137	67579886	67579936	67589876	67590189	6587	10196	1,49	17483	0,56	187	43	0.0360691	1	0.697,0.479	1.0,0.665	-0.245
31719	ENSG00000198001	IRAK4	chr12	+	44154727	44154775	44152769	44152819	44161905	44162075	31719	0,2	3,54	0,9	3,31	41	43	0.0361104	1	0.0,0.037	0.0,0.233	-0.098
49316	ENSG00000130396	MLLT4	chr6	+	168314082	168314103	168311963	168312169	168314847	168314993	49316	0,0	1,23	0,3	1,10	28	85	0.0362792	1	0.0,0.0	0.0,0.477	-0.239
11070	ENSG00000160767	FAM189B	chr1	-	155221523	155221699	155220885	155220955	155223415	155223523	11070	6157	0,16	11207	0,5	225	63	0.0364161	1	1.0,0.733	1.0,0.921	-0.094
69532	ENSG00000108312	UBTF	chr17	-	42289711	42289822	42289240	42289374	42290186	42290307	69532	8225	20373	11421	8429	182	85	0.0365695	1	0.157,0.22	0.391,0.314	-0.164
57246	ENSG00000011143	MKS1	chr17	-	56292101	56292199	56291619	56291748	56293448	56293604	57246	2194	3,14	10208	0,5	170	85	0.0365917	1	0.25,0.874	1.0,0.954	-0.415
52069	ENSG00000076043	REXO2	chr11	+	114318547	114318601	114311377	114311461	114320567	114320778	52069	25,39	2,35	12,54	0,7	86	77	0.0366875	1	0.918,0.499	1.0,0.874	-0.229
55722	ENSG00000163697	APBB2	chr4	-	41035252	41035321	41015599	41016415	41102655	41102767	55722	1,23	0,4	5,38	0,0	124	85	0.0367822	1	1.0,0.798	1.0,1.0	-0.101
70222	ENSG00000198477	ZNF280B	chr22	-	22848381	22848499	22841202	22843791	22862976	22863472	70222	5,49	0,9	1,46	0,0	189	85	0.0368819	1	1.0,0.71	1.0,1.0	-0.145
2710	ENSG00000153006	SREK1IP1	chr5	-	64060871	64060948	64036962	64037027	64064331	64064454	2710	0,16	5,57	0,21	3,22	113	58	0.0371057	1	0.0,0.126	0.0,0.329	-0.102
14233	ENSG00000110274	CEP164	chr11	+	117234144	117234222	117233119	117233254	117241795	117242182	14233	4,31	0,11	4,66	0,5	142	85	0.0371614	1	1.0,0.628	1.0,0.888	-0.13
26641	ENSG00000172889	EGFL7	chr9	+	139564620	139564782	139564365	139564461	139565401	139565466	26641	2,36	1,3	5,83	0,0	206	58	0.0372036	1	0.36,0.772	1.0,1.0	-0.434
36985	ENSG00000197905	TEAD4	chr12	+	3069113	3069362	3068572	3068647	3103903	3104149	36985	10178	4,66	6183	0,29	303	68	0.0372504	1	0.359,0.377	1.0,0.586	-0.425
65152	ENSG00000182973	CNOT10	chr3	+	32778901	32778982	32776291	32776468	32800949	32801063	65152	12156	6,80	11165	4,41	148	85	0.0373204	1	0.535,0.528	0.612,0.698	-0.123
39589	ENSG00000102974	CTCF	chr16	+	67644726	67645516	67605050	67605167	67650647	67650781	39589	2223167	2,99	1022892	0,28	861	85	0.0373588	1	0.916,0.76	1.0,0.911	-0.117
50482	ENSG00000115307	AUP1	chr2	-	74755543	74755616	74755066	74755133	74756258	74756409	50482	3,21	0,10	3,37	0,3	107	60	0.0373808	1	1.0,0.541	1.0,0.874	-0.167
65736	ENSG00000155846	PPARGC1B	chr5	+	149210329	149210446	149206235	149206448	149212218	149213341	65736	2,35	0,15	1,59	0,6	188	85	0.0374973	1	1.0,0.513	1.0,0.816	-0.151
41119	ENSG00000153207	AHCTF1	chr1	-	247007096	247007230	247002399	247004300	247012916	247014744	41119	17,74	0,17	25,86	0,0	205	85	0.0375233	1	1.0,0.643	1.0,1.0	-0.179
44384	ENSG00000100889	PCK2	chr14	+	24563974	24564054	24563489	24563643	24567411	24567596	44384	1,15	2,21	2,28	0,14	146	85	0.0377675	1	0.225,0.294	1.0,0.538	-0.51
63060	ENSG00000153066	TXNDC11	chr16	-	11794307	11794420	11791980	11792181	11815432	11815526	63060	8,53	0,13	10,80	0,4	184	85	0.0377693	1	1.0,0.653	1.0,0.902	-0.125
42983	ENSG00000182628	SKA2	chr17	-	57196679	57196856	57187307	57189706	57232491	57232800	42983	79556	33368	68653	22241	248	85	0.0380096	1	0.451,0.341	0.514,0.482	-0.102
61904	ENSG00000132423	COQ3	chr6	-	99831573	99831700	99828064	99828217	99841949	99842067	61904	8,63	0,7	7,91	0,0	198	85	0.0380385	1	1.0,0.794	1.0,1.0	-0.103
66997	ENSG00000111325	OGFOD2	chr12	+	123462527	123462604	123461417	123461517	123462906	123463094	66997	0,10	8,26	4,23	1,44	140	85	0.0382014	1	0.0,0.189	0.708,0.241	-0.38
25433	ENSG00000163374	YY1AP1	chr1	-	155650206	155650247	155649199	155649303	155657861	155658110	25433	11105	1,48	6,90	0,15	68	85	0.03826	1	0.932,0.732	1.0,0.882	-0.109
55593	ENSG00000114346	ECT2	chr3	+	172477945	172478053	172476769	172476859	172479399	172479473	55593	31197	6,11	31161	0,1	159	65	0.0382621	1	0.679,0.88	1.0,0.985	-0.213
10952	ENSG00000148484	RSU1	chr10	-	16858971	16859083	16824032	16824083	16859313	16859527	10952	33849	0,34	4850	1,75	142	44	0.0382712	1	1.0,0.886	0.553,0.778	0.278
5127	ENSG00000115866	DARS	chr2	-	136740966	136741024	136718965	136719068	136743363	136743467	5127	1,37	0,12	1,31	0,1	102	85	0.038358	1	1.0,0.72	1.0,0.963	-0.122
59571	ENSG00000237441	RGL2	chr6	-	33266231	33266428	33264808	33264892	33266646	33266752	59571	2388	0,16	1334	0,39	260	77	0.0383593	1	1.0,0.878	1.0,0.717	0.081
5403	ENSG00000104325	DECR1	chr8	+	91029351	91029554	91013632	91013789	91031136	91031194	5403	54304	3,21	47471	1,9	240	51	0.0383596	1	0.793,0.755	0.909,0.917	-0.139
52935	ENSG00000168958	MFF	chr2	+	228211941	228212100	228205007	228205096	228220392	228220477	52935	12141	25202	27147	21124	220	75	0.0383945	1	0.141,0.192	0.305,0.288	-0.13
19518	ENSG00000158411	MITD1	chr2	-	99787805	99787892	99786997	99787115	99787972	99788109	19518	25,75	4,17	15,68	3,54	160	85	0.0384095	1	0.769,0.701	0.726,0.401	0.172
17295	ENSG00000119599	DCAF4	chr14	+	73408452	73408532	73406927	73407085	73412591	73412735	17295	3,61	1,13	3,54	2,1	146	85	0.0384114	1	0.636,0.732	0.466,0.969	-0.034
14582	ENSG00000103121	C16orf61	chr16	-	81015410	81015482	81009698	81010076	81040338	81040719	14582	5,56	11,83	11,55	0,49	130	85	0.038418	1	0.229,0.306	1.0,0.423	-0.444
14975	ENSG00000198000	NOL8	chr9	-	95073427	95073541	95072834	95072957	95076548	95078420	14975	16170	0,15	2115	0,27	185	85	0.0384211	1	1.0,0.839	1.0,0.662	0.089
1943	ENSG00000077157	PPP1R12B	chr1	+	202414173	202414356	202411653	202411700	202418116	202418225	1943	2,53	1,26	6,57	0,8	209	40	0.0384563	1	0.277,0.281	1.0,0.577	-0.509
6684	ENSG00000125462	C1orf61	chr1	-	156384445	156384545	156374155	156374393	156391346	156391544	6684	0,3	4,13	0,16	2,10	171	85	0.0384734	1	0.0,0.103	0.0,0.443	-0.17
14501	ENSG00000146918	NCAPG2	chr7	-	158454885	158455059	158451029	158451100	158456875	158456988	14501	521279	2,53	321294	0,4	224	64	0.0385122	1	0.881,0.873	1.0,0.989	-0.117
72399	ENSG00000178802	MPI	chr15	+	75189351	75189560	75188492	75188666	75189852	75191798	72399	37566	4105	23789	7257	280	85	0.0385863	1	0.737,0.621	0.499,0.482	0.189
34514	ENSG00000135426	KIAA0748	chr12	-	55377777	55377950	55368203	55368391	55378368	55378530	34514	9,98	7240	7154	5136	244	85	0.0386251	1	0.309,0.125	0.328,0.283	-0.089
66809	ENSG00000086102	NFX1	chr9	+	33328578	33328676	33318907	33319125	33332469	33332500	66809	15,94	0,8	6110	0,0	109	24	0.0388353	1	1.0,0.721	1.0,1.0	-0.139
55039	ENSG00000182362	YBEY	chr21	+	47711247	47711376	47706783	47707037	47716075	47716144	55039	24,76	0,1	10,72	2,7	177	62	0.0389358	1	1.0,0.964	0.637,0.783	0.272
52946	ENSG00000168958	MFF	chr2	+	228193393	228193505	228189884	228190143	228197134	228197304	52946	26719	8,54	21614	0,17	183	85	0.0389729	1	0.602,0.861	1.0,0.944	-0.24
34464	ENSG00000128915	NARG2	chr15	-	60748855	60748993	60747524	60747641	60760259	60760521	34464	8,65	0,0	9,25	0,4	209	85	0.0390963	1	1.0,1.0	1.0,0.718	0.141
23221	ENSG00000186106	ANKRD46	chr8	-	101544583	101544688	101541750	101542088	101545436	101545539	23221	4,35	10108	0,16	11124	176	85	0.0391793	1	0.162,0.135	0.0,0.059	0.119
1579	ENSG00000142634	EFHD2	chr1	+	15753645	15753780	15752366	15752514	15755088	15756839	1579	68531	4,38	33817	5122	206	85	0.0393915	1	0.875,0.852	0.731,0.734	0.131
2410	ENSG00000146067	FAM193B	chr5	-	176980497	176980803	176980168	176980351	176981249	176981348	2410	28756	2,10	16489	1,28	377	85	0.0394521	1	0.759,0.945	0.783,0.797	0.062
24639	ENSG00000104218	CSPP1	chr8	+	68105698	68105837	68102884	68102994	68107616	68108498	24639	6130	0,5	5,99	2,15	210	85	0.0394845	1	1.0,0.913	0.503,0.728	0.341
34881	ENSG00000138381	ASNSD1	chr2	+	190530101	190530177	190526188	190526336	190530766	190532322	34881	11,56	0,12	10,76	0,2	138	85	0.0395333	1	1.0,0.742	1.0,0.959	-0.109
56311	ENSG00000109332	UBE2D3	chr4	-	103748748	103748898	103747641	103747793	103749100	103749186	56311	5435	3125	11574	1,86	215	79	0.0396125	1	0.38,0.561	0.802,0.71	-0.286
51506	ENSG00000036672	USP2	chr11	-	119243416	119244231	119230893	119230944	119252182	119252436	51506	10125	0,8	3218	0,1	845	44	0.0396937	1	1.0,0.449	1.0,0.919	-0.235
22293	ENSG00000198088	NUP62CL	chrX	-	106397325	106397476	106396683	106396733	106410878	106411014	22293	2,60	2,18	4,54	0,4	180	43	0.0396984	1	0.193,0.443	1.0,0.763	-0.563
48263	ENSG00000132639	SNAP25	chr20	+	10279915	10280060	10258332	10258374	10286776	10288066	48263	1,80	0,4	2,46	0,13	166	35	0.0397922	1	1.0,0.808	1.0,0.427	0.191
16690	ENSG00000116863	ADPRHL2	chr1	+	36556844	36556941	36554475	36554716	36557218	36557426	16690	18344	1,32	15561	0,10	170	85	0.0398317	1	0.9,0.843	1.0,0.966	-0.112
56993	ENSG00000145725	PPIP5K2	chr5	+	102523014	102523077	102522020	102522140	102526542	102526683	56993	0,7	1,4	2,13	0,1	112	85	0.0399398	1	0.0,0.57	1.0,0.908	-0.669
6868	ENSG00000256632	PXMP2	chr12	+	133277835	133277955	133266848	133266962	133291443	133291622	6868	0,58	2,57	1,83	0,37	191	85	0.0399702	1	0.0,0.312	1.0,0.5	-0.594
25059	ENSG00000111331	OAS3	chr12	+	113403701	113403834	113402142	113402213	113405222	113405398	25059	1,41	0,3	4119	0,0	183	64	0.0400224	1	1.0,0.827	1.0,1.0	-0.087
29252	ENSG00000164031	DNAJB14	chr4	-	100849698	100849774	100844196	100844342	100851606	100851691	29252	5,45	11113	0,25	11126	131	78	0.0400713	1	0.213,0.192	0.0,0.106	0.15
21982	ENSG00000016864	GLT8D1	chr3	-	52738739	52738968	52734460	52734512	52739718	52739807	21982	10290	0,15	6327	0,1	257	42	0.0401813	1	1.0,0.76	1.0,0.982	-0.111
18009	ENSG00000162910	MRPL55	chr1	-	228296137	228296722	228295935	228296019	228296849	228297000	18009	79572	13,63	41427	8103	648	77	0.0402412	1	0.419,0.519	0.378,0.33	0.115
27172	ENSG00000164073	MFSD8	chr4	-	128886226	128886363	128878655	128878747	128887051	128887104	27172	4109	0,5	2,91	0,16	169	46	0.0402625	1	1.0,0.856	1.0,0.608	0.124
47991	ENSG00000075539	FRYL	chr4	-	48504844	48504862	48503639	48503750	48507563	48507632	47991	0,22	3,50	0,3	3,53	11	62	0.0402755	1	0.0,0.713	0.0,0.242	0.236
29856	ENSG00000102445	KIAA0226L	chr13	-	46946075	46946213	46942867	46942950	46961268	46961365	29856	2,60	0,21	3,54	0,5	200	76	0.0406757	1	1.0,0.521	1.0,0.804	-0.142
42470	ENSG00000244306	none_found	chr14	-	19921590	19921738	19921358	19921470	19925239	19925306	42470	1,9	16121	2,40	6135	194	60	0.0407096	1	0.019,0.022	0.093,0.084	-0.068
24409	ENSG00000132613	MTSS1L	chr16	-	70713217	70713226	70712154	70712312	70713532	70713607	24409	1,67	1,63	1,47	2,69	2	68	0.0407097	1	0.971,0.973	0.944,0.959	0.02
15519	ENSG00000087586	AURKA	chr20	-	54963367	54963562	54963211	54963258	54965611	54965721	15519	4,30	2,10	1,7	1,16	221	40	0.0408857	1	0.266,0.352	0.153,0.073	0.196
11419	ENSG00000159459	UBR1	chr15	-	43262717	43262805	43258350	43258484	43268914	43269065	11419	6167	0,2	11126	1,18	162	85	0.0409457	1	1.0,0.978	0.852,0.786	0.17
69807	ENSG00000070759	TESK2	chr1	-	45923235	45923543	45887396	45887518	45956523	45956840	69807	15112	0,0	6,99	0,6	379	85	0.0409577	1	1.0,1.0	1.0,0.787	0.107
20457	ENSG00000120370	GORAB	chr1	+	170505450	170505562	170502604	170502792	170508350	170508708	20457	4,20	0,7	1,47	0,2	183	85	0.0409989	1	1.0,0.57	1.0,0.916	-0.173
17587	ENSG00000007392	LUC7L	chr16	-	258599	258663	258076	258187	270647	270746	17587	5133	4108	1,50	5,72	114	85	0.0410669	1	0.482,0.479	0.13,0.341	0.245
59544	ENSG00000160124	CCDC58	chr3	-	122090521	122090647	122081814	122081874	122102020	122102078	59544	17230	1,8	35300	0,1	131	19	0.0410925	1	0.711,0.807	1.0,0.978	-0.23
5282	ENSG00000064489	MEF2BNB,MEF2BNB-MEF2B	chr19	-	19291494	19291570	19261490	19261573	19293381	19293492	5282	12166	8,58	7323	0,62	129	76	0.041259	1	0.469,0.628	1.0,0.754	-0.329
8870	ENSG00000136925	TSTD2	chr9	-	100389587	100389894	100387962	100388279	100395524	100395583	8870	8176	0,6	12248	0,0	345	52	0.0413432	1	1.0,0.816	1.0,1.0	-0.092
6058	ENSG00000187239	FNBP1	chr9	-	132686122	132686218	132671168	132671278	132687238	132687436	6058	21190	143495	9,55	98383	170	85	0.0414368	1	0.068,0.161	0.044,0.067	0.059
71549	ENSG00000036054	TBC1D23	chr3	+	100030676	100030721	100029246	100029386	100034942	100035031	71549	5,59	0,1	4,34	0,8	73	82	0.0414785	1	1.0,0.985	1.0,0.827	0.079
68979	ENSG00000118495	PLAGL1	chr6	-	144269121	144269597	144261438	144263800	144281605	144281679	68979	9234	4,15	8270	0,4	529	67	0.0415166	1	0.222,0.664	1.0,0.895	-0.504
40102	ENSG00000153317	ASAP1	chr8	-	131104218	131104389	131092147	131092217	131124339	131124568	40102	21137	2,15	15151	0,4	220	63	0.0415332	1	0.75,0.723	1.0,0.915	-0.221
71064	ENSG00000168522	FNTA	chr8	+	42919243	42919358	42911472	42911689	42924697	42924802	71064	12168	3,56	7222	0,36	186	85	0.0415623	1	0.646,0.578	1.0,0.738	-0.257
57652	ENSG00000223546	none_found	chrX	+	102119969	102120080	102100784	102100948	102139070	102140334	57652	1,10	0,3	2,26	0,0	182	85	0.0415856	1	1.0,0.609	1.0,1.0	-0.196
38185	ENSG00000256500	APOPT1	chr14	+	104040443	104040507	104029298	104029461	104053610	104053701	38185	14,26	0,0	5,20	0,5	113	84	0.0415986	1	1.0,1.0	1.0,0.748	0.126
53872	ENSG00000155016	CYP2U1	chr4	+	108866125	108866761	108852524	108853289	108868531	108868693	53872	27133	0,16	23195	0,5	707	85	0.0416671	1	1.0,0.5	1.0,0.824	-0.162
63808	ENSG00000121775	TMEM39B	chr1	+	32542764	32542919	32542363	32542447	32557275	32557612	63808	12134	0,2	14132	1,13	218	77	0.0416806	1	1.0,0.959	0.832,0.782	0.173
10308	ENSG00000075151	EIF4G3	chr1	-	21327691	21327805	21307540	21307720	21329205	21329301	10308	1,33	4,75	5,31	3,31	185	85	0.0416935	1	0.103,0.168	0.434,0.315	-0.239
16464	ENSG00000162298	SYVN1	chr11	-	64899718	64899822	64898940	64899067	64900202	64900251	16464	11270	0,14	11318	0,0	132	42	0.0417262	1	1.0,0.86	1.0,1.0	-0.07
36841	ENSG00000189171	S100A13	chr1	-	153599958	153600074	153598807	153599009	153603486	153603554	36841	3,4	0,3	5,16	0,0	163	61	0.0418248	1	1.0,0.333	1.0,1.0	-0.334
15839	ENSG00000073150	PANX2	chr22	+	50613860	50613911	50609189	50609385	50615367	50615545	15839	1,12	0,10	1,23	0,4	88	85	0.0418588	1	1.0,0.537	1.0,0.847	-0.155
40598	ENSG00000151012	SLC7A11	chr4	-	139157478	139157605	139153420	139153536	139162946	139163503	40598	8204	2,17	4137	0,1	198	85	0.0420806	1	0.632,0.837	1.0,0.983	-0.257
16477	ENSG00000171204	TMEM126B	chr11	+	85342730	85342852	85339645	85339732	85345129	85345323	16477	44277	9101	36292	3,59	188	80	0.0424165	1	0.675,0.539	0.836,0.678	-0.15
39764	ENSG00000160783	PMF1,PMF1-BGLAP	chr1	+	156195347	156195459	156182796	156182967	156203418	156203519	39764	3,9	0,23	2,17	0,9	183	85	0.042419	1	1.0,0.154	1.0,0.467	-0.157
58085	ENSG00000150995	ITPR1	chr3	+	4829630	4829823	4825499	4825604	4836748	4836871	58085	7,97	0,0	5,88	0,7	264	85	0.0424277	1	1.0,1.0	1.0,0.802	0.099
17926	ENSG00000167107	ACSF2	chr17	+	48541886	48541960	48541578	48541655	48548388	48548761	17926	0,18	5,73	1,32	1,56	119	70	0.042456	1	0.0,0.127	0.37,0.252	-0.248
27379	ENSG00000113360	DROSHA	chr5	-	31531556	31531632	31530904	31531031	31532096	31532181	27379	45576	3154	26531	15185	131	78	0.0425015	1	0.899,0.69	0.508,0.631	0.225
33635	ENSG00000183323	CCDC125	chr5	-	68609811	68609870	68606944	68607031	68616063	68616172	33635	2,12	0,8	1,25	1,2	99	80	0.0425019	1	1.0,0.548	0.447,0.91	0.096
18000	ENSG00000162910	MRPL55	chr1	-	228296137	228296175	228295935	228296019	228296961	228297000	18000	8,55	2,18	4,43	1,34	23	24	0.042588	1	0.807,0.761	0.807,0.569	0.096
69335	ENSG00000151287	C13orf27	chr13	-	103422361	103422436	103421660	103421891	103426031	103426161	69335	20,64	9140	12141	4,94	136	85	0.0426334	1	0.581,0.222	0.652,0.484	-0.167
9607	ENSG00000111196	MAGOHB	chr12	-	10765413	10765577	10763220	10763279	10766037	10766172	9607	10,72	19173	2,37	22208	202	52	0.0428384	1	0.119,0.097	0.023,0.044	0.075
28799	ENSG00000214595	EML6	chr2	+	55106683	55106777	55098636	55098742	55118190	55118291	28799	5,35	0,0	2,22	0,4	170	85	0.0428463	1	1.0,1.0	1.0,0.733	0.133
50670	ENSG00000186577	C6orf1	chr6	-	34215243	34215269	34214820	34214926	34215457	34215641	50670	4,55	0,1	1,52	1,13	38	85	0.0428499	1	1.0,0.992	0.691,0.899	0.201
2664	ENSG00000162236	STX5	chr11	-	62598490	62598734	62595032	62595103	62599425	62599514	2664	301041	0,4	51142	0,40	291	61	0.042859	1	1.0,0.982	1.0,0.857	0.063
20924	ENSG00000139197	PEX5	chr12	+	7354836	7354947	7354346	7354437	7355207	7355300	20924	511728	18330	10798	9249	181	84	0.0430285	1	0.568,0.708	0.34,0.598	0.169
996	ENSG00000196693	ZNF33B	chr10	-	43132367	43132420	43127742	43127887	43133921	43134001	996	5,81	0,21	2,71	1,38	80	73	0.043035	1	1.0,0.779	0.646,0.63	0.251
71387	ENSG00000056097	ZFR	chr5	-	32380180	32380278	32379220	32379316	32385613	32385755	71387	12235	3,90	11312	2,33	170	85	0.043081	1	0.667,0.566	0.733,0.825	-0.162
68102	ENSG00000132294	EFR3A	chr8	+	133013015	133013245	133008636	133008744	133014005	133014054	68102	10105	1,7	3,37	4,8	258	42	0.0431852	1	0.619,0.709	0.109,0.43	0.394
36392	ENSG00000136573	BLK	chr8	+	11400732	11400856	11351509	11352100	11403560	11403612	36392	3116	0,1	2101	0,9	155	45	0.0432205	1	1.0,0.971	1.0,0.765	0.103
39866	ENSG00000100445	SDR39U1	chr14	-	24911314	24911466	24909988	24910132	24911551	24911581	39866	14571	1,5	7589	0,25	161	23	0.0433019	1	0.667,0.942	1.0,0.771	-0.081
67076	ENSG00000182175	RGMA	chr15	-	93616144	93616260	93595222	93595737	93632147	93632433	67076	4,23	0,6	2,64	0,2	187	85	0.0433101	1	1.0,0.635	1.0,0.936	-0.15
12125	ENSG00000058272	PPP1R12A	chr12	-	80199945	80200113	80199371	80199548	80201005	80201110	12125	39209	8,53	15206	2,11	239	85	0.043476	1	0.634,0.584	0.727,0.869	-0.189
54020	ENSG00000143756	FBXO28	chr1	+	224321775	224321914	224318173	224318283	224345053	224345852	54020	7,58	1,15	9,67	0,5	210	85	0.0435805	1	0.739,0.61	1.0,0.844	-0.247
65164	ENSG00000167578	RAB4B	chr19	+	41285923	41286004	41284170	41284296	41292569	41292665	65164	19481	3,65	11385	0,18	148	85	0.0436533	1	0.784,0.81	1.0,0.925	-0.165
14979	ENSG00000178295	GEN1	chr2	+	17952462	17952554	17950004	17950078	17953900	17954051	14979	4,54	0,7	3,67	0,0	152	67	0.0436655	1	1.0,0.773	1.0,1.0	-0.113
38873	ENSG00000009790	TRAF3IP3	chr1	+	209951455	209951518	209950696	209950832	209952659	209952719	38873	7,55	1,5	12111	0,0	80	53	0.043709	1	0.823,0.879	1.0,1.0	-0.149
18798	ENSG00000188994	ZNF292	chr6	+	87955220	87955362	87953192	87953329	87964367	87973914	18798	21176	6,14	29137	0,5	213	85	0.0438336	1	0.583,0.834	1.0,0.916	-0.25
53615	ENSG00000122507	BBS9	chr7	+	33195249	33195314	33192312	33192463	33217089	33217203	53615	14,30	0,1	1,40	2,0	116	85	0.0440365	1	1.0,0.956	0.268,1.0	0.344
36953	ENSG00000137075	RNF38	chr9	-	36390463	36390613	36375930	36376124	36487304	36487545	36953	2,34	0,4	2,75	0,0	221	85	0.0440996	1	1.0,0.766	1.0,1.0	-0.117
44088	ENSG00000160299	PCNT	chr21	+	47845744	47845885	47841883	47842038	47847535	47847709	44088	19244	5,85	8315	0,57	212	85	0.0441181	1	0.604,0.535	1.0,0.689	-0.275
34183	ENSG00000165813	C10orf118	chr10	-	115932899	115933024	115921366	115923088	115933773	115933961	34183	0,80	7269	10,63	7122	196	85	0.0441275	1	0.0,0.114	0.383,0.183	-0.226
52416	ENSG00000140307	GTF2A2	chr15	-	59944404	59944525	59934334	59934461	59949604	59949720	52416	50641	9,53	47820	1,29	192	85	0.0443777	1	0.711,0.843	0.954,0.926	-0.163
64930	ENSG00000187838	PLSCR3	chr17	-	7296462	7296683	7296109	7296271	7296785	7296828	64930	18490	0,11	6617	2,38	243	36	0.0443835	1	1.0,0.868	0.308,0.706	0.427
65602	ENSG00000155366	RHOC	chr1	-	113247721	113247745	113246265	113246428	113249699	113249747	65602	56533	19129	4415	6145	17	41	0.0443882	1	0.877,0.909	0.617,0.873	0.148
73224	ENSG00000055917	none_found	chr2	-	20532727	20532824	20527070	20527139	20550357	20550463	73224	0,1	14184	2,4	0,180	147	62	0.0444148	1	0.0,0.002	1.0,0.009	-0.503
54412	ENSG00000066427	ATXN3	chr14	-	92555073	92555161	92549469	92549602	92572872	92572934	54412	17,79	1,22	11,79	0,6	132	55	0.044486	1	0.876,0.599	1.0,0.846	-0.186
6987	ENSG00000224078	none_found	chr15	+	25309861	25310003	25307096	25307235	25315266	25315406	6987	6,56	0,5	8164	1,0	213	85	0.0445149	1	1.0,0.817	0.761,1.0	0.028
13035	ENSG00000179295	PTPN11	chr12	+	112924278	112924433	112919877	112920009	112939947	112940060	13035	68692	3,57	46741	0,19	226	85	0.044584	1	0.895,0.82	1.0,0.936	-0.111
70538	ENSG00000105221	AKT2	chr19	-	40774490	40774592	40771128	40771258	40776404	40776676	70538	2,22	0,7	1,24	0,0	173	85	0.0447769	1	1.0,0.607	1.0,1.0	-0.197
29111	ENSG00000160193	WDR4	chr21	-	44293660	44293801	44283549	44283706	44296811	44296877	29111	3,65	0,5	4154	1,0	186	59	0.0447848	1	1.0,0.805	0.559,1.0	0.123
71970	ENSG00000173409	ARV1	chr1	+	231125855	231126009	231114839	231115025	231131505	231131730	71970	7,46	0,0	5,62	0,9	225	85	0.0447952	1	1.0,1.0	1.0,0.722	0.139
32061	ENSG00000155393	HEATR3	chr16	+	50106515	50106625	50104088	50104201	50109481	50109622	32061	9123	0,6	3134	0,22	181	85	0.0448392	1	1.0,0.906	1.0,0.741	0.083
12071	ENSG00000135535	CD164	chr6	-	109691613	109691670	109690124	109690220	109697276	109697315	12071	27290	5,17	33215	7,43	50	32	0.0448647	1	0.776,0.916	0.751,0.762	0.09
47777	ENSG00000105755	ETHE1	chr19	-	44030352	44030501	44015588	44015718	44030666	44030811	47777	38568	7,59	43908	0,60	220	85	0.0448711	1	0.677,0.788	1.0,0.854	-0.195
32024	ENSG00000168137	SETD5	chr3	+	9471510	9471735	9470506	9470693	9475528	9475634	32024	57534	7,95	34431	3,34	296	85	0.0449148	1	0.7,0.617	0.765,0.784	-0.116
67679	ENSG00000172456	FGGY	chr1	+	59805629	59805741	59762683	59762822	59811918	59812070	67679	12,58	0,3	7,29	2,6	183	85	0.0450513	1	1.0,0.9	0.619,0.692	0.295
55767	ENSG00000116731	PRDM2	chr1	+	14104912	14109326	14099572	14099683	14113009	14114574	55767	8082992	2,38	10904642	0,27	4485	85	0.0450951	1	0.884,0.599	1.0,0.765	-0.141
14898	ENSG00000257076	none_found	chr12	-	123712092	123712163	123707584	123707674	123714807	123715069	14898	18,36	4,25	5,31	8,31	126	83	0.0451414	1	0.748,0.487	0.292,0.397	0.273
61876	ENSG00000088305	DNMT3B	chr20	+	31374307	31374433	31372563	31372665	31375035	31375257	61876	6113	1,17	8153	0,7	197	85	0.0453059	1	0.721,0.741	1.0,0.904	-0.221
33465	ENSG00000254469	none_found	chr11	-	71636978	71637150	71634354	71634521	71639410	71639449	33465	0,2	3,9	1,35	0,19	190	32	0.0453301	1	0.0,0.036	1.0,0.237	-0.601
3301	ENSG00000116237	ICMT	chr1	-	6294464	6294571	6293533	6293703	6294945	6295034	3301	6,43	21231	12114	20282	175	82	0.045382	1	0.118,0.08	0.219,0.159	-0.09
21114	ENSG00000164258	NDUFS4	chr5	+	52900553	52900725	52899281	52899360	52942062	52942235	21114	0,27	36548	5,54	12409	230	72	0.0454284	1	0.0,0.015	0.115,0.04	-0.07
32682	ENSG00000163811	WDR43	chr2	+	29140758	29140861	29136934	29137074	29145784	29145849	32682	17108	0,9	20121	0,0	147	58	0.0454802	1	1.0,0.826	1.0,1.0	-0.087
32969	ENSG00000172995	ARPP21	chr3	+	35750460	35750562	35748465	35748574	35756930	35756968	32969	14110	3,32	26263	1,36	119	31	0.0455323	1	0.549,0.472	0.871,0.656	-0.253
44358	ENSG00000171466	ZNF562	chr19	-	9767222	9767329	9759362	9764557	9785690	9785756	44358	3,40	0,6	8,39	0,0	152	59	0.0455386	1	1.0,0.721	1.0,1.0	-0.139
11566	ENSG00000101150	TPD52L2	chr20	+	62514071	62514173	62505020	62505169	62521202	62521427	11566	5194	0,13	9299	0,0	173	85	0.0455445	1	1.0,0.88	1.0,1.0	-0.06
28381	ENSG00000107651	SEC23IP	chr10	+	121657938	121658471	121652222	121652457	121662310	121662521	28381	57675	0,22	60848	0,1	604	85	0.0455993	1	1.0,0.812	1.0,0.992	-0.09
20336	ENSG00000126858	RHOT1	chr17	+	30536368	30536464	30535125	30535328	30551634	30552746	20336	18,87	23141	23110	21,92	170	85	0.0457781	1	0.281,0.236	0.354,0.374	-0.105
20335	ENSG00000126858	RHOT1	chr17	+	30536368	30536464	30535125	30535328	30538134	30538257	20335	10,86	5,76	19102	8,28	170	85	0.0457835	1	0.5,0.361	0.543,0.646	-0.164
23644	ENSG00000111358	GTF2H3	chr12	+	124123810	124123890	124118375	124118419	124130001	124130108	23644	5118	1,37	10184	0,26	98	37	0.0458607	1	0.654,0.546	1.0,0.728	-0.264
51625	ENSG00000077232	DNAJC10	chr2	+	183600975	183601113	183595756	183595834	183604271	183605115	51625	4,27	0,4	5,53	0,0	195	71	0.0458607	1	1.0,0.711	1.0,1.0	-0.145
18681	ENSG00000175354	PTPN2	chr18	-	12859162	12859253	12836789	12836890	12884071	12884337	18681	18660	3,37	51513	1,4	168	85	0.0460031	1	0.752,0.9	0.963,0.985	-0.148
53527	ENSG00000157764	BRAF	chr7	-	140549910	140550012	140533860	140534672	140624365	140624509	53527	9290	0,27	12180	0,2	173	85	0.0460173	1	1.0,0.841	1.0,0.978	-0.069
29069	ENSG00000143393	PI4KB	chr1	-	151297220	151297393	151288115	151288985	151299746	151299853	29069	0,87	8171	6115	0,105	244	85	0.0462226	1	0.0,0.151	1.0,0.276	-0.563
15521	ENSG00000087586	AURKA	chr20	-	54956488	54956627	54945540	54945715	54961312	54961589	15521	13115	2,27	9,88	0,7	210	85	0.0464232	1	0.725,0.633	1.0,0.836	-0.239
29100	ENSG00000160193	WDR4	chr21	-	44293712	44293801	44283549	44283706	44296811	44296877	29100	2,61	0,5	5152	1,0	138	59	0.0464439	1	1.0,0.839	0.681,1.0	0.079
23931	ENSG00000227354	none_found	chr13	+	79991969	79992051	79980443	79980612	79994894	79994950	23931	1,2	0,2	3,12	0,0	114	49	0.0464891	1	1.0,0.301	1.0,1.0	-0.35
7947	ENSG00000238121	none_found	chr13	-	30938205	30938342	30937297	30937363	30941737	30941804	7947	0,10	1,3	2,20	0,0	157	34	0.0464954	1	0.0,0.419	1.0,1.0	-0.791
35944	ENSG00000156787	WDR67	chr8	+	124146353	124146446	124142437	124142573	124153000	124153141	35944	33232	2,25	9180	5,32	170	85	0.0465314	1	0.892,0.823	0.474,0.738	0.251
5656	ENSG00000197965	MPZL1	chr1	+	167745300	167745403	167734819	167734986	167757056	167757990	5656	10141	2133	3,95	0,28	174	85	0.0467795	1	0.71,0.341	1.0,0.624	-0.287
29253	ENSG00000164031	DNAJB14	chr4	-	100849698	100849774	100845916	100845972	100851606	100851691	29253	3,42	2,4	0,26	1,10	95	42	0.0469752	1	0.399,0.823	0.0,0.535	0.344
12876	ENSG00000144233	AMMECR1L	chr2	-	128624473	128624570	128619203	128622779	128631401	128631846	12876	4,96	0,34	10,90	0,13	170	85	0.047031	1	1.0,0.585	1.0,0.776	-0.096
13856	ENSG00000119242	CCDC92	chr12	-	124428818	124428911	124427893	124428040	124457075	124457371	13856	7,44	0,11	4,25	0,19	170	85	0.0470496	1	1.0,0.667	1.0,0.397	0.135
36950	ENSG00000137075	RNF38	chr9	-	36390463	36390613	36375930	36376124	36401094	36401195	36950	2,36	0,16	2,75	0,10	221	85	0.0470902	1	1.0,0.464	1.0,0.743	-0.139
5348	ENSG00000106610	none_found	chr7	+	66770973	66771070	66767657	66767752	66773921	66774126	5348	3,68	0,1	2,47	0,7	170	85	0.0471471	1	1.0,0.971	1.0,0.77	0.101
34212	ENSG00000100523	DDHD1	chr14	-	53560033	53560162	53558502	53558650	53570400	53570574	34212	25122	4,21	24102	0,7	200	85	0.0472974	1	0.726,0.712	1.0,0.861	-0.212
26950	ENSG00000131374	TBC1D5	chr3	-	17665340	17665405	17560393	17560487	17783972	17784056	26950	3,30	0,0	2,17	0,4	108	77	0.0473154	1	1.0,1.0	1.0,0.752	0.124
37261	ENSG00000185480	PARPBP	chr12	+	102545347	102545578	102542007	102542241	102547646	102547754	37261	11172	3,16	5,92	4,21	302	85	0.0473188	1	0.508,0.752	0.26,0.552	0.224
68208	ENSG00000119969	HELLS	chr10	+	96316935	96316979	96313882	96314005	96317895	96317952	68208	0,3	22,62	0,8	4,38	39	50	0.0473379	1	0.0,0.058	0.0,0.213	-0.078
2324	ENSG00000037897	METTL1	chr12	-	58165262	58165388	58164876	58165040	58165756	58165899	2324	1,16	3110	2,88	0,222	197	85	0.0473928	1	0.126,0.059	1.0,0.146	-0.48
30281	ENSG00000157823	C15orf38-AP3S2,AP3S2	chr15	-	90420537	90420656	90414706	90414778	90431752	90431864	30281	2,7	13,74	1,14	0,40	170	65	0.0475261	1	0.056,0.035	1.0,0.118	-0.514
805	ENSG00000165304	MELK	chr9	+	36581640	36581736	36572893	36573004	36589532	36589649	805	11302	2,91	25249	4,36	170	85	0.0475565	1	0.733,0.624	0.758,0.776	-0.089
17073	ENSG00000144674	GOLGA4	chr3	+	37315026	37315092	37292885	37292975	37323448	37323763	17073	4112	1,27	11,57	1,4	116	83	0.0475702	1	0.741,0.748	0.887,0.911	-0.155
31635	ENSG00000205643	C22orf40	chr22	-	46644068	46644181	46639909	46641135	46646152	46646576	31635	2103	3,18	3128	0,7	184	85	0.0475742	1	0.235,0.726	1.0,0.894	-0.467
31684	ENSG00000132541	HRSP12	chr8	-	99120873	99120979	99118499	99118554	99129259	99129399	31684	7264	0,22	7419	0,5	140	48	0.0476466	1	1.0,0.804	1.0,0.966	-0.081
55	ENSG00000135749	PCNXL2	chr1	-	233362971	233363117	233353776	233353930	233372590	233372726	55	6,38	0,3	5,21	1,8	217	85	0.047692	1	1.0,0.832	0.662,0.507	0.331
12891	ENSG00000119950	MXI1	chr10	+	112004585	112004615	111987946	111988079	112038937	112039052	12891	3,49	2,57	1,57	0,36	46	85	0.0477313	1	0.735,0.614	1.0,0.745	-0.198
39441	ENSG00000174915	PTDSS2	chr11	+	451351	451493	450450	450637	460186	460288	39441	0,19	2284	2,49	2204	213	85	0.0478653	1	0.0,0.026	0.285,0.087	-0.173
32122	ENSG00000164253	WDR41	chr5	-	76760585	76760634	76758930	76759051	76785281	76785397	32122	21100	0,0	6,96	0,12	84	85	0.0478664	1	1.0,1.0	1.0,0.89	0.055
12715	ENSG00000090487	SPG21	chr15	-	65275844	65275931	65273201	65273363	65282002	65282153	12715	18243	4,88	19340	0,73	160	85	0.0478667	1	0.705,0.595	1.0,0.712	-0.206
52709	ENSG00000177565	TBL1XR1	chr3	-	176797614	176797733	176782707	176782810	176816253	176816329	52709	6,71	9279	18141	13270	174	69	0.0478901	1	0.209,0.092	0.354,0.172	-0.113
49424	ENSG00000113108	APBB3	chr5	-	139941428	139941580	139941171	139941286	139941684	139941812	49424	2183	2117	2190	2261	223	85	0.0479077	1	0.276,0.374	0.276,0.217	0.079
49230	ENSG00000100916	BRMS1L	chr14	+	36302183	36302311	36300615	36300706	36331795	36331892	49230	1,29	0,5	3,34	0,0	198	84	0.0479342	1	1.0,0.711	1.0,1.0	-0.145
10521	ENSG00000069849	ATP1B3	chr3	+	141620977	141621069	141596370	141596404	141622461	141622590	10521	1,3	3,6	1,9	0,1	112	27	0.0479362	1	0.074,0.108	1.0,0.685	-0.752
17122	ENSG00000197885	NKIRAS1	chr3	-	23952819	23952937	23952301	23952412	23958274	23958460	17122	4,31	0,0	3,22	0,5	189	85	0.0479708	1	1.0,1.0	1.0,0.664	0.168
57573	ENSG00000185838	GNB1L	chr22	-	19808750	19808898	19799817	19799970	19841965	19842366	57573	40499	8107	7537	0,58	219	85	0.0479711	1	0.66,0.644	1.0,0.782	-0.239
52509	ENSG00000001167	NFYA	chr6	+	41048549	41048636	41046767	41046903	41051784	41051931	52509	3165	17566	2266	10461	160	85	0.0481486	1	0.086,0.134	0.096,0.235	-0.055
26991	ENSG00000148057	C9orf103	chr9	+	86243095	86243126	86238082	86238136	86243787	86243874	26991	0,5	1,5	2,20	0,8	19	42	0.0483255	1	0.0,0.689	1.0,0.847	-0.579
31819	ENSG00000123562	MORF4L2	chrX	-	102933426	102933528	102931865	102931979	102940098	102940188	31819	130890	4169	85804	0,72	171	83	0.0484278	1	0.94,0.719	1.0,0.844	-0.093
71552	ENSG00000117523	PRRC2C	chr1	+	171481170	171481339	171454650	171454874	171482133	171482311	71552	81461	1,37	60457	0,5	240	85	0.0484318	1	0.966,0.815	1.0,0.97	-0.095
53028	ENSG00000100629	none_found	chr14	-	81424521	81424629	81408627	81408724	81425775	81425845	53028	13707	3,55	7257	0,4	157	63	0.0484876	1	0.635,0.838	1.0,0.963	-0.245
2232	ENSG00000132716	DCAF8	chr1	-	160194851	160194909	160194231	160194339	160195380	160195453	2232	25551	3,99	22448	0,35	83	66	0.0485676	1	0.869,0.816	1.0,0.911	-0.113
70572	ENSG00000111224	PARP11	chr12	-	3938075	3938196	3935323	3935399	3939055	3939184	70572	9,21	4,4	2,16	5,10	176	69	0.048628	1	0.469,0.673	0.136,0.385	0.31
67441	ENSG00000125695	STRADA	chr17	-	61803997	61804055	61791365	61791468	61805693	61805773	67441	5,51	2,24	1,32	1,32	90	73	0.0487741	1	0.67,0.633	0.448,0.448	0.203
21717	ENSG00000160584	SIK3	chr11	-	116824759	116824823	116797934	116798096	116827663	116827780	21717	1,29	0,10	8,33	0,3	114	85	0.048781	1	1.0,0.684	1.0,0.891	-0.103
56646	ENSG00000164118	CEP44	chr4	+	175237680	175237718	175237316	175237441	175238485	175239816	56646	5,18	0,0	1,22	2,5	62	85	0.049006	1	1.0,1.0	0.407,0.858	0.368
66313	ENSG00000157193	LRP8	chr1	-	53738275	53738314	53736898	53737018	53741302	53741335	66313	0,34	8483	0,110	7403	32	26	0.0490181	1	0.0,0.054	0.0,0.182	-0.064
66503	ENSG00000157426	AASDH	chr4	-	57248642	57248763	57244313	57244630	57253527	57253589	66503	2,7	1,5	1,13	0,0	162	55	0.0490929	1	0.404,0.322	1.0,1.0	-0.637
5872	ENSG00000118894	FAM86A	chr16	-	5141794	5141896	5140432	5140566	5143484	5143565	5872	1,56	3,8	9118	0,11	162	74	0.0491143	1	0.132,0.762	1.0,0.831	-0.469
62960	ENSG00000188690	UROS	chr10	-	127482590	127482957	127477293	127477574	127483448	127483547	62960	10,73	27116	11177	15126	438	85	0.0492	1	0.067,0.109	0.125,0.214	-0.081
11599	ENSG00000119414	PPP6C	chr9	-	127923119	127923185	127916232	127916264	127933363	127933459	11599	11211	2,79	20286	3,22	59	25	0.0492266	1	0.7,0.531	0.739,0.846	-0.177
34996	ENSG00000066855	MTFR1	chr8	+	66594562	66594686	66582107	66582253	66605878	66605994	34996	8,65	3,9	6,57	0,1	195	85	0.0493893	1	0.538,0.759	1.0,0.961	-0.332
69878	ENSG00000253426	none_found	chr8	+	9012475	9012586	9009312	9009426	9013661	9013873	69878	4,27	0,5	5,60	0,1	182	85	0.0494491	1	1.0,0.716	1.0,0.966	-0.125
38907	ENSG00000116688	MFN2	chr1	+	12042026	12042171	12040368	12040541	12049221	12049400	38907	20290	1,69	16384	0,44	216	85	0.0494673	1	0.887,0.623	1.0,0.774	-0.132
58421	ENSG00000064102	ASUN	chr12	-	27089511	27089747	27081635	27081838	27090728	27091254	58421	11186	0,15	21130	1,0	307	85	0.0494863	1	1.0,0.774	0.853,1.0	-0.039
18011	ENSG00000162910	MRPL55	chr1	-	228296137	228296722	228295947	228296022	228296849	228297000	18011	71521	0,1	38389	1,8	639	68	0.0495132	1	1.0,0.982	0.802,0.838	0.171
10619	ENSG00000157741	UBN2	chr7	+	138966750	138966801	138964063	138964106	138967769	138969320	10619	0,3	3,3	4,2	0,1	44	36	0.0495156	1	0.0,0.45	1.0,0.621	-0.586
68587	ENSG00000035499	DEPDC1B	chr5	-	59894901	59895087	59892738	59893741	59899217	59899394	68587	84335	2,23	49315	0,3	257	85	0.0495549	1	0.933,0.828	1.0,0.972	-0.105
32020	ENSG00000168137	SETD5	chr3	+	9475053	9475246	9471510	9471735	9475528	9475634	32020	9162	10,69	6250	4,54	264	85	0.0496152	1	0.225,0.431	0.326,0.598	-0.134
48281	ENSG00000074054	CLASP1	chr2	-	122203024	122203072	122187648	122187753	122204912	122205083	48281	2120	1,76	5102	3,28	82	85	0.0496451	1	0.675,0.621	0.633,0.791	-0.064
12926	ENSG00000164638	SLC29A4	chr7	+	5327436	5327616	5322592	5322713	5330362	5330494	12926	24303	0,3	2253	0,16	251	85	0.0496669	1	1.0,0.972	1.0,0.843	0.065
36981	ENSG00000197905	TEAD4	chr12	+	3069113	3069519	3068571	3068647	3103903	3103999	36981	10185	4,66	6189	0,29	461	69	0.0497267	1	0.272,0.296	1.0,0.494	-0.463
72272	ENSG00000179950	PUF60	chr8	-	144906482	144906569	144903987	144904083	144911449	144911485	72272	31797	2104	131067	1254	104	29	0.0497795	1	0.812,0.681	0.784,0.539	0.085
17304	ENSG00000141198	TOM1L1	chr17	+	52981068	52981153	52978051	52978284	52990026	52990176	17304	1,25	0,22	1,39	0,11	156	85	0.0499508	1	1.0,0.382	1.0,0.659	-0.138
6513	ENSG00000109756	RAPGEF2	chr4	+	160265187	160265211	160264432	160264556	160266257	160266481	6513	2,14	0,15	7,15	0,5	34	85	0.0500388	1	1.0,0.7	1.0,0.882	-0.091
54576	ENSG00000138750	NUP54	chr4	-	77052382	77052437	77051808	77051902	77053675	77053872	54576	18108	0,4	9,97	5,4	96	85	0.0500512	1	1.0,0.96	0.614,0.955	0.196
53056	ENSG00000151665	PIGF	chr2	-	46842075	46842324	46840832	46840924	46844108	46844194	53056	18193	0,11	21224	0,1	314	79	0.0500932	1	1.0,0.815	1.0,0.983	-0.084
39013	ENSG00000116786	PLEKHM2	chr1	+	16047823	16047883	16046228	16046415	16051811	16052040	39013	9274	13191	13210	19262	106	85	0.0501034	1	0.357,0.535	0.354,0.391	0.074
59527	ENSG00000164347	GFM2	chr5	-	74026084	74026223	74021765	74021951	74028846	74028923	59527	30336	1,29	16373	0,7	195	70	0.0501476	1	0.915,0.806	1.0,0.95	-0.114
50761	ENSG00000064115	TM7SF3	chr12	-	27133498	27133579	27129194	27129290	27143382	27143479	50761	2,56	0,0	1,40	0,5	148	85	0.0501687	1	1.0,1.0	1.0,0.821	0.09
51920	ENSG00000146802	TMEM168	chr7	-	112423752	112425008	112407139	112407799	112430214	112430647	51920	82489	0,9	71488	0,0	1327	85	0.0502007	1	1.0,0.777	1.0,1.0	-0.111
34015	ENSG00000145431	PDGFC	chr4	-	157782580	157782641	157771372	157771568	157891937	157892467	34015	2,21	4,39	3,28	3,22	108	85	0.0503724	1	0.282,0.298	0.44,0.5	-0.18
8249	ENSG00000164649	CDCA7L	chr7	-	21951234	21951369	21947984	21948125	21956371	21956512	8249	109709	11550	52528	4202	206	85	0.0503921	1	0.803,0.347	0.843,0.519	-0.106
7093	ENSG00000198586	TLK1	chr2	-	171879381	171879639	171871360	171871458	171884848	171884915	7093	6,43	26,48	5,47	10,17	304	60	0.0504258	1	0.044,0.15	0.09,0.353	-0.124
24454	ENSG00000118707	TGIF2,TGIF2-C20ORF24	chr20	+	35219312	35219412	35207229	35207369	35219907	35220326	24454	2151	0,2	8113	1,14	171	85	0.0504957	1	1.0,0.974	0.799,0.8	0.187
44860	ENSG00000171757	LRRC34	chr3	-	169514532	169514687	169511314	169511626	169518446	169518542	44860	3,40	0,4	1108	0,0	226	85	0.0504998	1	1.0,0.79	1.0,1.0	-0.105
65614	ENSG00000145808	ADAMTS19	chr5	+	128863440	128863524	128861976	128862149	128864212	128864370	65614	3,13	0,0	1,3	0,2	154	85	0.0505977	1	1.0,1.0	1.0,0.453	0.273
16466	ENSG00000162298	SYVN1	chr11	-	64899718	64899779	64898940	64899067	64900202	64900251	16466	5151	0,14	5178	0,0	65	42	0.0506358	1	1.0,0.875	1.0,1.0	-0.063
13718	ENSG00000093167	LRRFIP2	chr3	-	37132957	37133029	37125135	37125297	37136282	37136399	13718	41217	2,14	12166	5,18	130	85	0.0506523	1	0.931,0.91	0.611,0.858	0.186
60966	ENSG00000148840	PPRC1	chr10	+	103904776	103904847	103898856	103901761	103906428	103907149	60966	5,75	1,11	1113	0,0	128	85	0.0506543	1	0.769,0.819	1.0,1.0	-0.206
33673	ENSG00000118513	MYB	chr6	+	135518098	135518461	135516885	135517055	135520045	135520188	33673	1,95	0,7	9,82	0,0	434	85	0.0507492	1	1.0,0.727	1.0,1.0	-0.137
22684	ENSG00000198408	MGEA5	chr10	-	103550652	103550845	103547120	103547280	103552595	103552700	22684	20159	7,12	9163	0,2	264	85	0.0508071	1	0.479,0.81	1.0,0.963	-0.337
24490	ENSG00000083168	KAT6A	chr8	-	41907093	41907225	41905895	41906820	41909418	41909505	24490	13182	14169	6178	5,88	198	80	0.0508084	1	0.273,0.303	0.327,0.45	-0.1
48051	ENSG00000196247	ZNF107	chr7	+	64129414	64129556	64126510	64126663	64139554	64139714	48051	5134	7101	4,82	10120	213	85	0.050914	1	0.222,0.346	0.138,0.214	0.108
44768	ENSG00000089022	MAPKAPK5	chr12	+	112308074	112308164	112306556	112306665	112308888	112308984	44768	22263	0,20	11208	5,28	166	85	0.0511397	1	1.0,0.871	0.53,0.792	0.274
72017	ENSG00000149100	EIF3M	chr11	+	32610139	32610278	32605343	32605475	32611092	32611187	72017	45346	25206	39350	16119	210	85	0.0511957	1	0.421,0.405	0.497,0.543	-0.107
43706	ENSG00000136828	RALGPS1	chr9	+	129739973	129740024	129728122	129728230	129796709	129796793	43706	3,49	2,21	1,38	0,5	80	77	0.0512025	1	0.591,0.692	1.0,0.88	-0.299
18899	ENSG00000109689	STIM2	chr4	+	27023115	27023234	27019332	27019606	27024140	27024462	18899	0,2	4,60	0,17	4,31	190	85	0.0512925	1	0.0,0.015	0.0,0.197	-0.091
3127	ENSG00000104936	DMPK	chr19	-	46274607	46274654	46273522	46273898	46274825	46274923	3127	8,66	6,10	0,39	4,13	80	85	0.0513174	1	0.586,0.875	0.0,0.761	0.35
48066	ENSG00000101199	ARFGAP1	chr20	+	61917331	61917570	61917005	61917065	61917717	61917794	48066	7436	8,54	2300	3,88	263	38	0.0513246	1	0.112,0.538	0.088,0.33	0.116
14765	ENSG00000116830	TTF2	chr1	+	117629038	117629144	117624449	117624569	117631422	117631604	14765	6,93	0,26	6131	0,4	177	85	0.0514327	1	1.0,0.632	1.0,0.94	-0.154
26447	ENSG00000126214	KLC1	chr14	+	104151322	104151373	104145720	104145855	104151974	104152523	26447	3,90	3,23	0,87	1,45	88	85	0.0515262	1	0.491,0.791	0.0,0.651	0.316
26247	ENSG00000102265	TIMP1	chrX	+	47442806	47442935	47441806	47441873	47444334	47444414	26247	2,38	0,2	5171	0,0	163	48	0.051588	1	1.0,0.848	1.0,1.0	-0.076
58825	ENSG00000111725	PRKAB1	chr12	+	120109299	120109473	120105954	120106208	120110105	120110232	58825	1,36	22574	0,47	4186	245	85	0.0516716	1	0.016,0.021	0.0,0.081	-0.022
15644	ENSG00000116698	SMG7	chr1	+	183516237	183516387	183515100	183515472	183518898	183519058	15644	3112	0,15	7,53	2,19	221	85	0.0517182	1	1.0,0.742	0.574,0.518	0.325
39554	ENSG00000128708	HAT1	chr2	+	172803227	172803303	172782046	172782151	172821858	172822038	39554	28216	6,25	25274	2,9	138	85	0.0517429	1	0.742,0.842	0.885,0.949	-0.125
43127	ENSG00000128641	MYO1B	chr2	+	192265474	192265561	192265107	192265194	192267357	192267444	43127	8,72	0,16	8198	0,4	150	75	0.0517463	1	1.0,0.692	1.0,0.961	-0.134
39205	ENSG00000169359	SLC33A1	chr3	-	155560220	155560408	155551256	155551374	155571011	155572218	39205	10,36	0,6	13,66	0,1	259	85	0.0518189	1	1.0,0.663	1.0,0.956	-0.146
71252	ENSG00000196204	none_found	chr7	+	5028693	5028808	5015931	5016067	5036240	5037796	71252	1,22	0,5	5,22	0,0	186	85	0.0518326	1	1.0,0.668	1.0,1.0	-0.166
16958	ENSG00000157216	SSBP3	chr1	-	54723741	54723822	54717466	54717533	54747110	54747200	16958	0,48	1,3	9107	0,1	121	58	0.0518726	1	0.0,0.885	1.0,0.981	-0.548
489	ENSG00000177426	TGIF1	chr18	+	3450322	3450503	3450033	3450068	3456351	3456578	489	10,95	1,7	3148	0,1	195	28	0.0519143	1	0.589,0.661	1.0,0.955	-0.353
22808	ENSG00000131697	NPHP4	chr1	-	6046214	6046387	6029146	6029319	6052303	6052533	22808	3,79	0,10	4,74	0,1	244	85	0.0523049	1	1.0,0.733	1.0,0.963	-0.115
52287	ENSG00000162885	B3GALNT2	chr1	-	235621910	235622094	235618870	235618996	235643369	235643465	52287	18146	4,22	15130	0,7	255	85	0.0523267	1	0.6,0.689	1.0,0.861	-0.286
65938	ENSG00000117139	KDM5B	chr1	-	202736053	202736188	202733176	202733273	202742245	202742416	65938	35624	4,50	27779	0,22	206	85	0.0525433	1	0.783,0.837	1.0,0.936	-0.158
58086	ENSG00000150995	ITPR1	chr3	+	4695525	4695570	4693806	4693902	4699807	4699962	58086	1,6	0,11	0,15	2,7	76	85	0.0525914	1	1.0,0.379	0.0,0.706	0.337
6620	ENSG00000134759	ELP2	chr18	+	33719381	33719576	33718232	33718389	33721099	33721164	6620	3,49	0,5	1,48	1,18	239	58	0.0526711	1	1.0,0.704	0.195,0.393	0.558
24688	ENSG00000138092	CENPO	chr2	+	25016720	25016834	25016332	25016389	25022543	25022663	24688	10359	3,74	13659	2,70	150	50	0.0528312	1	0.526,0.618	0.684,0.758	-0.149
69822	ENSG00000135837	CEP350	chr1	+	179972308	179972422	179965687	179966310	179981063	179981210	69822	19,78	1,23	9,77	0,2	185	85	0.052859	1	0.897,0.609	1.0,0.946	-0.22
19599	ENSG00000166037	CEP57	chr11	+	95550950	95551067	95546631	95546753	95551990	95552068	19599	67935	3,54	43701	0,6	174	71	0.0529745	1	0.901,0.876	1.0,0.979	-0.101
9330	ENSG00000086758	HUWE1	chrX	-	53652746	53652989	53652117	53652219	53654360	53654466	9330	31209	8,23	25290	3,12	314	85	0.0529777	1	0.512,0.711	0.693,0.867	-0.169
24331	ENSG00000104756	KCTD9	chr8	-	25303595	25303766	25298092	25298189	25315714	25315992	24331	15249	0,14	7242	0,35	242	85	0.0530332	1	1.0,0.862	1.0,0.708	0.077
26552	ENSG00000164053	ATRIP	chr3	+	48491898	48491981	48491442	48491576	48493134	48493305	26552	0,0	6,23	0,7	4,18	152	85	0.053086	1	0.0,0.0	0.0,0.179	-0.09
36425	ENSG00000136811	ODF2	chr9	+	131219476	131219716	131218744	131218855	131221845	131221936	36425	16174	0,7	2104	2,0	310	84	0.0531786	1	1.0,0.871	0.213,1.0	0.329
693	ENSG00000178741	COX5A	chr15	-	75221456	75221573	75219106	75219228	75230255	75230509	693	2395674	22417	2346065	9169	188	85	0.05334	1	0.831,0.86	0.922,0.942	-0.087
8156	ENSG00000103222	ABCC1	chr16	+	16110352	16110478	16101672	16101849	16126965	16127027	8156	14212	0,17	23163	0,2	167	55	0.0534202	1	1.0,0.804	1.0,0.964	-0.08
45094	ENSG00000101187	SLCO4A1	chr20	+	61297731	61297927	61296285	61296440	61299096	61299262	45094	5400	0,0	4346	0,15	267	85	0.0534909	1	1.0,1.0	1.0,0.88	0.06
27846	ENSG00000118961	C2orf43	chr2	-	21001069	21001225	20990014	20990158	21022796	21022870	27846	18171	0,0	14179	0,10	209	67	0.0536097	1	1.0,1.0	1.0,0.852	0.074
27378	ENSG00000113360	DROSHA	chr5	-	31521229	31521322	31515094	31515326	31526185	31527019	27378	24384	0,25	1465	0,68	170	85	0.0537226	1	1.0,0.885	1.0,0.774	0.055
67749	ENSG00000100425	BRD1	chr22	-	50214481	50214634	50197851	50198008	50216598	50216853	67749	0,37	5158	1,64	2122	224	85	0.0538282	1	0.0,0.082	0.159,0.166	-0.122
11601	ENSG00000119414	PPP6C	chr9	-	127920519	127920661	127916184	127916264	127933363	127933459	11601	40365	2,79	71428	3,22	201	73	0.0539243	1	0.879,0.627	0.896,0.876	-0.133
24135	ENSG00000154710	RABGEF1	chr7	+	66248661	66248828	66240213	66240380	66260497	66260579	24135	19125	0,15	21138	0,3	228	75	0.053962	1	1.0,0.733	1.0,0.938	-0.102
29617	ENSG00000153094	BCL2L11	chr2	+	111911356	111911481	111881626	111881716	111921709	111922220	29617	0,20	1,11	1,23	0,3	194	83	0.0540008	1	0.0,0.438	1.0,0.766	-0.664
66376	ENSG00000129518	EAPP	chr14	-	34998563	34998681	34993902	34994013	35002649	35002745	66376	29248	2,29	16330	0,12	189	85	0.0540075	1	0.867,0.794	1.0,0.925	-0.132
34833	ENSG00000010803	SCMH1	chr1	-	41618270	41618413	41617285	41617356	41625396	41625605	34833	12,54	0,9	10,54	2,24	193	64	0.0540848	1	1.0,0.666	0.624,0.427	0.308
50837	ENSG00000240403	KIR3DL2	chr19	+	55370533	55370584	55367073	55367367	55377259	55377364	50837	1,18	0,5	2,22	0,0	88	85	0.0541268	1	1.0,0.777	1.0,1.0	-0.111
20174	ENSG00000119541	VPS4B	chr18	-	61074664	61074732	61070939	61071059	61077522	61077679	20174	10205	1,26	9324	0,10	122	85	0.0541986	1	0.874,0.846	1.0,0.958	-0.119
68579	ENSG00000100376	FAM118A	chr22	+	45726483	45726612	45719055	45719308	45728305	45728591	68579	1189	0,21	2153	0,4	200	85	0.0542189	1	1.0,0.793	1.0,0.942	-0.074
62962	ENSG00000188690	UROS	chr10	-	127481147	127481313	127477293	127477574	127483448	127483547	62962	2,21	27116	3,60	15126	237	85	0.054255	1	0.026,0.061	0.067,0.146	-0.063
60032	ENSG00000215114	UBXN2B	chr8	+	59347416	59347507	59346953	59347063	59352191	59352329	60032	3,9	3,20	1,21	0,14	168	85	0.054267	1	0.336,0.185	1.0,0.431	-0.455
2056	ENSG00000067066	SP100	chr2	+	231313802	231313865	231311533	231311617	231325976	231326129	2056	5,24	0,0	2,17	0,4	104	77	0.0543074	1	1.0,1.0	1.0,0.759	0.121
9882	ENSG00000173276	ZNF295	chr21	-	43422458	43422672	43414056	43414217	43423005	43423070	9882	1,9	0,24	1,42	0,26	258	58	0.0543241	1	1.0,0.078	1.0,0.266	-0.094
68604	ENSG00000151498	ACAD8	chr11	+	134126981	134127151	134123441	134123603	134128901	134128978	68604	3241	0,73	3207	0,24	226	70	0.0544247	1	1.0,0.506	1.0,0.728	-0.111
11535	ENSG00000155744	FAM126B	chr2	-	201852087	201852255	201843215	201846594	201852984	201853144	11535	0,59	6,76	1,46	5,25	239	85	0.0545139	1	0.0,0.216	0.066,0.396	-0.123
19052	ENSG00000114933	INO80D	chr2	-	206872007	206872165	206869603	206870257	206874300	206874518	19052	8121	0,0	9,46	0,4	229	85	0.0546361	1	1.0,1.0	1.0,0.81	0.095
33104	ENSG00000119685	TTLL5	chr14	+	76203908	76203950	76201537	76201632	76211437	76211551	33104	2,10	14,54	4,15	8,38	70	85	0.0546492	1	0.148,0.184	0.378,0.324	-0.185
44319	ENSG00000166167	BTRC	chr10	+	103221737	103221815	103190101	103190209	103239124	103239214	44319	6,54	0,9	5,69	0,1	140	83	0.0547014	1	1.0,0.781	1.0,0.976	-0.097
8614	ENSG00000103671	TRIP4	chr15	+	64698528	64698658	64692941	64693020	64701811	64701883	8614	5101	0,9	10236	0,5	168	52	0.054752	1	1.0,0.776	1.0,0.936	-0.08
54797	ENSG00000102910	LONP2	chr16	+	48292528	48292651	48290520	48290652	48295334	48295498	54797	28207	5,34	17195	2,11	194	85	0.0549771	1	0.71,0.727	0.788,0.886	-0.119
22422	ENSG00000070010	UFD1L	chr22	-	19462590	19462623	19459209	19459331	19466605	19466695	22422	5195	4179	7188	6353	50	83	0.0550401	1	0.675,0.644	0.659,0.469	0.095
47642	ENSG00000145687	SSBP2	chr5	-	80932375	80932437	80809446	80809536	80946085	80946158	47642	6192	0,36	8228	0,14	89	64	0.0550595	1	1.0,0.793	1.0,0.921	-0.064
58529	ENSG00000154589	LY96	chr8	+	74917030	74917120	74903586	74903789	74922235	74922364	58529	15,48	5,26	5,86	1,17	166	85	0.055108	1	0.606,0.486	0.719,0.721	-0.174
64578	ENSG00000146909	NOM1	chr7	+	156751299	156751550	156746805	156746992	156752544	156752812	64578	0,9	5124	0,46	8101	322	85	0.0552702	1	0.0,0.019	0.0,0.107	-0.044
64558	ENSG00000179051	RCC2	chr1	-	17764725	17765018	17755601	17755695	17766040	17766220	64558	1533142	0,0	794846	6,48	364	85	0.0552802	1	1.0,1.0	0.755,0.959	0.143
11572	ENSG00000101150	TPD52L2	chr20	+	62507168	62507228	62505020	62505169	62514071	62514173	11572	14225	5178	1266	9280	106	85	0.0553312	1	0.692,0.503	0.082,0.432	0.34
34695	ENSG00000114956	DGUOK	chr2	+	74166036	74166149	74153952	74154179	74185272	74185372	34695	25233	15,90	12340	5,71	184	85	0.0556284	1	0.435,0.545	0.526,0.689	-0.117
11032	ENSG00000149179	C11orf49	chr11	+	47158866	47159111	47073938	47074069	47159195	47159280	11032	7,18	3,39	3,8	10,52	309	78	0.0556285	1	0.371,0.104	0.07,0.037	0.184
51031	ENSG00000172661	FAM21C	chr10	+	46254762	46254849	46252459	46252587	46258835	46258937	51031	5,54	0,3	1,58	0,13	160	85	0.0557086	1	1.0,0.905	1.0,0.703	0.101
2535	ENSG00000094975	C1orf9	chr1	+	172522399	172522510	172520651	172520766	172525008	172525163	2535	19,34	0,7	18,29	5,12	182	85	0.0557213	1	1.0,0.694	0.627,0.53	0.268
26840	ENSG00000049449	RCN1	chr11	+	32124549	32124748	32122077	32122154	32124826	32125026	26840	0,5	19167	2,23	3158	255	70	0.0558717	1	0.0,0.008	0.155,0.038	-0.093
19644	ENSG00000168710	AHCYL1	chr1	+	110563352	110563473	110562169	110562248	110564295	110564319	19644	24555	2,11	39564	0,2	111	4	0.0559808	1	0.302,0.645	1.0,0.91	-0.482
35006	ENSG00000119509	INVS	chr9	+	103008897	103009069	103004851	103004961	103014564	103014720	35006	5,72	0,5	9104	0,0	243	85	0.0560068	1	1.0,0.834	1.0,1.0	-0.083
46850	ENSG00000116001	TIA1	chr2	-	70456190	70456223	70454866	70454954	70456395	70456450	46850	1,19	7,47	1,21	6,23	22	44	0.0560606	1	0.222,0.447	0.25,0.646	-0.113
24487	ENSG00000083168	KAT6A	chr8	-	41907137	41907225	41905895	41906820	41909418	41909505	24487	11111	14169	5109	5,88	157	80	0.0560736	1	0.286,0.251	0.338,0.387	-0.094
3716	ENSG00000114126	TFDP2	chr3	-	141712379	141712427	141697361	141697524	141724282	141724386	3716	44162	11,46	34135	2,22	82	85	0.0562231	1	0.806,0.785	0.946,0.864	-0.109
42980	ENSG00000182628	SKA2	chr17	-	57208641	57208728	57187307	57189706	57232491	57232800	42980	121838	33368	89988	22241	160	85	0.056236	1	0.661,0.547	0.682,0.685	-0.079
61318	ENSG00000182944	EWSR1	chr22	+	29687553	29687588	29682911	29683123	29688125	29688158	61318	1,26	0,39	1,38	0,17	28	26	0.0563712	1	1.0,0.382	1.0,0.675	-0.146
16198	ENSG00000114982	KANSL3	chr2	-	97267852	97268075	97267379	97267513	97268489	97268599	16198	751161	3,86	551557	1,40	294	85	0.0563761	1	0.878,0.796	0.941,0.918	-0.093
12991	ENSG00000165806	CASP7	chr10	+	115451722	115451829	115439698	115439737	115457252	115457362	12991	0,23	8150	2,60	3149	125	32	0.0564554	1	0.0,0.038	0.146,0.093	-0.1
29242	ENSG00000100023	none_found	chr22	+	22012931	22012975	22012554	22012751	22015125	22015310	29242	1,19	0,8	1,36	0,53	74	85	0.0565966	1	1.0,0.732	1.0,0.438	0.147
65473	ENSG00000129317	PUS7L	chr12	-	44132112	44132194	44130183	44130464	44136259	44136358	65473	18,46	1,5	14,81	0,0	150	85	0.0569195	1	0.911,0.839	1.0,1.0	-0.125
58472	ENSG00000111237	VPS29	chr12	-	110937261	110937351	110933816	110934008	110939853	110939916	58472	5,60	22224	6118	9232	137	56	0.0569326	1	0.085,0.099	0.214,0.172	-0.101
45943	ENSG00000133872	TMEM66	chr8	-	29931392	29931571	29927157	29927575	29940362	29940464	45943	1243170	5280	802400	0,102	250	85	0.0569372	1	0.894,0.794	1.0,0.889	-0.1
48835	ENSG00000089351	GRAMD1A	chr19	+	35504159	35504272	35502377	35502458	35504444	35504595	48835	49690	9,64	50783	1,38	173	74	0.0570649	1	0.7,0.822	0.955,0.898	-0.166
3793	ENSG00000169180	XPO6	chr16	-	28188540	28188653	28187218	28187416	28222686	28223190	3793	17135	2,69	26132	1,36	184	85	0.0571125	1	0.797,0.475	0.923,0.629	-0.14
12924	ENSG00000063854	HAGH	chr16	-	1876507	1876603	1872865	1873038	1876712	1876842	12924	19420	19602	2520	28851	170	85	0.0571951	1	0.333,0.259	0.034,0.234	0.162
25689	ENSG00000087087	SRRT	chr7	+	100480385	100480711	100479673	100479862	100481690	100481860	25689	22656	20240	5493	13294	397	85	0.0572712	1	0.191,0.369	0.076,0.264	0.11
71880	ENSG00000132485	ZRANB2	chr1	-	71531360	71531435	71529019	71530820	71532458	71532617	71880	25195	15105	20308	10,37	136	85	0.0577523	1	0.51,0.537	0.556,0.839	-0.174
14743	ENSG00000119318	RAD23B	chr9	+	110064315	110064395	110045559	110045976	110068659	110068928	14743	57466	1,56	76438	0,13	146	85	0.0577547	1	0.971,0.829	1.0,0.951	-0.076
55461	ENSG00000112304	ACOT13	chr6	+	24687632	24687921	24667262	24667572	24698110	24698295	55461	2,22	44323	5,71	29275	360	85	0.0577815	1	0.011,0.016	0.039,0.057	-0.035
29224	ENSG00000093217	XYLB	chr3	+	38404427	38404508	38388269	38388416	38406689	38406776	29224	1,68	0,6	2,97	0,0	143	80	0.0579129	1	1.0,0.864	1.0,1.0	-0.068
13490	ENSG00000011454	RABGAP1	chr9	+	125719289	125719488	125703311	125703367	125746763	125746950	13490	21263	0,9	34267	0,0	234	49	0.0579453	1	1.0,0.86	1.0,1.0	-0.07
69272	ENSG00000065559	MAP2K4	chr17	+	11958205	11958308	11924134	11924318	11998891	11999011	69272	4,48	0,10	5,57	0,2	174	85	0.0580944	1	1.0,0.701	1.0,0.933	-0.116
24807	ENSG00000166025	AMOTL1	chr11	+	94528176	94528326	94501536	94501726	94532555	94532705	24807	20187	5141	11251	0,109	221	85	0.058175	1	0.606,0.338	1.0,0.47	-0.263
5440	ENSG00000185684	none_found	chr12	+	132594312	132594377	132593116	132593227	132604964	132605146	5440	2,6	1,24	1,18	0,21	116	85	0.0582205	1	0.594,0.155	1.0,0.386	-0.319
18294	ENSG00000214046	C19orf42	chr19	-	16764845	16764936	16755555	16758072	16770205	16770258	18294	63617	12111	52707	7,64	129	46	0.0585353	1	0.652,0.665	0.726,0.798	-0.103
25904	ENSG00000081237	PTPRC	chr1	+	198671515	198671659	198668692	198668833	198672426	198672501	25904	1043074	7110	4055759	5,76	198	68	0.0586177	1	0.836,0.906	0.965,0.963	-0.093
56191	ENSG00000185019	UBOX5	chr20	-	3095950	3096112	3088218	3090960	3102029	3103230	56191	5,47	3,20	6,77	3,11	233	85	0.0586331	1	0.378,0.462	0.422,0.719	-0.15
41590	ENSG00000130713	EXOSC2	chr9	+	133573548	133573638	133572968	133573014	133574715	133574781	41590	17195	0,16	18420	0,11	94	13	0.0586585	1	1.0,0.628	1.0,0.841	-0.106
35219	ENSG00000225697	SLC26A6	chr3	-	48669677	48669770	48669312	48669477	48670406	48670517	35219	1324	1,68	1215	0,20	170	85	0.0587953	1	0.333,0.704	1.0,0.843	-0.403
24645	ENSG00000104218	CSPP1	chr8	+	68062017	68062170	68049690	68049838	68070681	68070831	24645	3,50	0,9	7,86	0,4	224	85	0.0588574	1	1.0,0.678	1.0,0.891	-0.107
8633	ENSG00000170049	KCNAB3	chr17	-	7828414	7828501	7827732	7827818	7829000	7829044	8633	3,91	0,1	2,81	0,8	106	31	0.0589799	1	1.0,0.964	1.0,0.748	0.108
24864	ENSG00000119397	CNTRL	chr9	+	123920017	123920158	123919747	123919878	123921132	123921297	24864	35297	0,57	9186	0,65	212	85	0.0591659	1	1.0,0.676	1.0,0.534	0.071
11208	ENSG00000148950	IMMP1L	chr11	-	31484718	31484852	31455006	31455117	31531065	31531139	11208	5102	23221	6124	14140	187	67	0.0591915	1	0.072,0.142	0.133,0.241	-0.08
16939	ENSG00000168591	TMUB2	chr17	+	42265274	42265377	42265043	42265111	42266302	42266667	16939	1,21	1,20	1,44	1,13	150	61	0.0592515	1	0.289,0.299	0.289,0.579	-0.14
15409	ENSG00000134030	CTIF	chr18	+	46162984	46163056	46145908	46146116	46190122	46190196	15409	2,92	0,8	6164	0,1	112	67	0.0592589	1	1.0,0.873	1.0,0.99	-0.059
34018	ENSG00000116791	CRYZ	chr1	-	75196065	75196104	75190394	75190518	75198639	75198745	34018	3,14	12102	0,3	15,90	64	85	0.0594186	1	0.249,0.154	0.0,0.042	0.181
14854	ENSG00000110881	ACCN2	chr12	+	50470750	50470843	50453669	50453737	50470995	50471146	14854	1,35	6126	1,84	1144	146	61	0.0595066	1	0.065,0.104	0.295,0.196	-0.161
46314	ENSG00000124214	STAU1	chr20	-	47790731	47790806	47770469	47770608	47804652	47804904	46314	37194	2,40	26157	0,12	136	85	0.0595315	1	0.92,0.752	1.0,0.891	-0.109
29462	ENSG00000020922	MRE11A	chr11	-	94212839	94212927	94211900	94212042	94219089	94219250	29462	16,84	0,20	15124	0,7	162	85	0.0595936	1	1.0,0.688	1.0,0.903	-0.108
27579	ENSG00000123908	EIF2C2	chr8	-	141545566	141545668	141542514	141542714	141549418	141549553	27579	61641	6,40	44593	0,11	173	85	0.0596923	1	0.833,0.887	1.0,0.964	-0.122
10225	ENSG00000174799	CEP135	chr4	+	56830439	56830568	56823388	56823530	56831809	56832746	10225	8,56	0,8	5,52	0,0	200	85	0.0597468	1	1.0,0.748	1.0,1.0	-0.126
11597	ENSG00000112576	CCND3	chr6	-	41997746	41997928	41908147	41908323	42016238	42016426	11597	2,41	7166	1,72	4111	253	85	0.0597947	1	0.088,0.077	0.077,0.179	-0.046
29896	ENSG00000204564	C6orf136	chr6	+	30617527	30617736	30614815	30615080	30619042	30619092	29896	13126	0,14	10137	0,3	238	43	0.0598465	1	1.0,0.619	1.0,0.892	-0.136
55356	ENSG00000041988	THAP3	chr1	+	6689702	6689784	6688558	6688751	6690347	6690413	55356	0,0	7,81	0,11	2,75	124	59	0.059938	1	0.0,0.0	0.0,0.065	-0.033
6586	ENSG00000213865	C8orf44-SGK3,C8orf44	chr8	+	67588979	67589137	67579886	67579936	67591955	67593235	6586	7167	0,32	14422	0,38	187	43	0.0600192	1	1.0,0.545	1.0,0.719	-0.087
33716	ENSG00000100890	KIAA0391	chr14	+	35595940	35595988	35591927	35592116	35596684	35596817	33716	4,60	4,44	6,62	1,26	82	85	0.0600592	1	0.509,0.586	0.861,0.712	-0.239
33625	ENSG00000105983	LMBR1	chr7	-	156480723	156480885	156474904	156476857	156516805	156516872	33625	37107	2,0	24100	4,5	208	60	0.0600898	1	0.842,1.0	0.634,0.852	0.178
35486	ENSG00000163376	KBTBD8	chr3	+	67049404	67049615	67048730	67048795	67053618	67054733	35486	5115	0,35	9108	0,13	255	58	0.0603809	1	1.0,0.428	1.0,0.654	-0.113
60154	ENSG00000138778	CENPE	chr4	-	104084293	104084413	104082491	104082614	104095892	104096060	60154	26119	0,10	19180	0,0	191	85	0.0606848	1	1.0,0.841	1.0,1.0	-0.08
65157	ENSG00000167578	RAB4B	chr19	+	41289825	41289980	41284170	41284296	41292569	41292665	65157	76611	3,65	23513	0,18	226	85	0.0607422	1	0.905,0.78	1.0,0.915	-0.115
50010	ENSG00000181555	SETD2	chr3	-	47127684	47127804	47108559	47108608	47139444	47139571	50010	1,65	0,6	4,57	0,0	148	42	0.0607522	1	1.0,0.755	1.0,1.0	-0.123
4710	ENSG00000151657	KIN	chr10	-	7822226	7822270	7822018	7822141	7829782	7829953	4710	1,26	0,6	2,43	0,1	74	85	0.0608005	1	1.0,0.833	1.0,0.98	-0.074
16798	ENSG00000185621	LMLN	chr3	+	197729885	197729996	197726136	197726213	197746123	197746256	16798	0,46	2,9	6,56	0,5	167	70	0.0608716	1	0.0,0.682	1.0,0.824	-0.571
33169	ENSG00000101391	CDK5RAP1	chr20	-	31975128	31975339	31973455	31973576	31979947	31980048	33169	7287	0,50	7469	0,22	282	85	0.0609078	1	1.0,0.634	1.0,0.865	-0.116
4182	ENSG00000244687	UBE2V1,TMEM189-UBE2V1	chr20	-	48700665	48700791	48697660	48699451	48713208	48713357	4182	951311	11348	741432	7146	197	85	0.0611359	1	0.788,0.619	0.82,0.809	-0.111
30229	ENSG00000117262	GPR89A	chr1	-	145826387	145826715	145818766	145818826	145826887	145827015	30229	0,18	5,65	0,0	5,76	367	53	0.0613326	1	0.0,0.038	0.0,0.0	0.019
4881	ENSG00000103194	USP10	chr16	+	84767040	84767109	84733554	84733717	84778238	84779279	4881	7315	0,157	9364	0,34	124	85	0.0614232	1	1.0,0.579	1.0,0.88	-0.15
55761	ENSG00000116731	PRDM2	chr1	+	14059273	14059377	14057494	14057612	14068499	14068652	55761	4,18	0,3	15,29	0,0	175	85	0.0615647	1	1.0,0.745	1.0,1.0	-0.127
27339	ENSG00000099783	HNRNPM	chr19	+	8527412	8527465	8520288	8520458	8528380	8528388	27339	17271	0,6	6370	0,0	46	1	0.0615972	1	1.0,0.495	1.0,1.0	-0.252
30836	ENSG00000112282	MED23	chr6	-	131936463	131936481	131931185	131931386	131937046	131937142	30836	0,2	4108	0,9	5,60	22	85	0.0616172	1	0.0,0.067	0.0,0.367	-0.15
20426	ENSG00000070814	TCOF1	chr5	+	149771106	149771358	149769449	149769586	149771519	149774479	20426	21444	2,67	12462	1132	323	85	0.0616604	1	0.734,0.636	0.759,0.479	0.066
55560	ENSG00000181991	MRPS11	chr15	+	89015857	89015956	89010966	89011255	89018340	89018470	55560	27546	5,51	33686	2,23	170	85	0.0616628	1	0.73,0.843	0.892,0.937	-0.128
72073	ENSG00000138600	SPPL2A	chr15	-	51018269	51018323	51017417	51017520	51018517	51018574	72073	2,15	2,6	2,9	1,16	59	50	0.0617514	1	0.459,0.679	0.629,0.323	0.093
54293	ENSG00000173588	CCDC41	chr12	-	94796945	94797038	94772566	94772818	94805472	94805623	54293	4,34	1,7	3,40	0,1	170	85	0.0617822	1	0.667,0.708	1.0,0.952	-0.289
39915	ENSG00000196597	ZNF782	chr9	-	99615134	99615351	99614228	99614287	99616369	99616770	39915	4,37	0,22	3,60	0,10	255	52	0.0618987	1	1.0,0.255	1.0,0.55	-0.148
28628	ENSG00000100150	DEPDC5	chr22	+	32269240	32269318	32266575	32266730	32275510	32275738	28628	3,57	0,2	2,57	0,11	142	85	0.0619518	1	1.0,0.945	1.0,0.756	0.094
34994	ENSG00000066855	MTFR1	chr8	+	66594587	66594686	66556973	66557019	66605878	66605994	34994	8,67	1,20	6,58	0,5	124	39	0.0619592	1	0.716,0.513	1.0,0.785	-0.278
50242	ENSG00000149311	ATM	chr11	+	108095510	108095598	108093842	108093913	108098321	108098423	50242	0,16	11270	0,43	2210	141	64	0.0620056	1	0.0,0.026	0.0,0.085	-0.03
33919	ENSG00000015153	YAF2	chr12	-	42604349	42604421	42555414	42555567	42631400	42631526	33919	0,2	10114	1,10	0,105	130	85	0.0622904	1	0.0,0.011	1.0,0.059	-0.524
39706	ENSG00000173473	SMARCC1	chr3	-	47814306	47814426	47787397	47787483	47823092	47823407	39706	59802	6108	471078	2,70	185	79	0.0624405	1	0.808,0.76	0.909,0.868	-0.105
14477	ENSG00000162813	BPNT1	chr1	-	220236098	220236296	220233027	220233133	220240643	220240735	14477	30543	2,29	25634	0,8	269	85	0.0624644	1	0.826,0.855	1.0,0.962	-0.14
14953	ENSG00000064687	ABCA7	chr19	+	1054568	1054693	1054191	1054340	1054778	1054877	14953	6201	0,9	1157	0,22	196	85	0.0627429	1	1.0,0.906	1.0,0.756	0.075
29947	ENSG00000148835	TAF5	chr10	+	105137991	105138307	105133114	105133352	105139364	105139528	29947	33288	1,8	49334	0,0	387	85	0.0627581	1	0.879,0.888	1.0,1.0	-0.117
9474	ENSG00000050748	MAPK9	chr5	-	179713974	179714067	179707439	179707608	179718847	179719053	9474	1,11	3209	5,35	3177	170	85	0.0627809	1	0.143,0.026	0.455,0.09	-0.188
50870	ENSG00000113971	ACAD11	chr3	-	132338311	132338389	132337477	132337616	132345534	132345661	50870	4,46	0,4	2,24	0,8	142	85	0.0628466	1	1.0,0.873	1.0,0.642	0.116
51455	ENSG00000105223	PLD3	chr19	+	40871624	40871837	40854632	40854675	40872325	40872417	51455	36288	0,27	15592	3,96	235	36	0.0628976	1	1.0,0.62	0.434,0.486	0.35
38534	ENSG00000174718	C12orf35	chr12	+	32123122	32123290	32113710	32113805	32133811	32138891	38534	78620	7117	41454	3,33	239	85	0.0629329	1	0.799,0.653	0.829,0.83	-0.103
16998	ENSG00000135597	REPS1	chr6	-	139247537	139247615	139242173	139242261	139251113	139251134	16998	5120	0,20	10103	0,5	67	10	0.063041	1	1.0,0.472	1.0,0.755	-0.141
53504	ENSG00000106462	EZH2	chr7	-	148529725	148529842	148526819	148526940	148543561	148543690	53504	99715	0,9	73611	6,24	188	85	0.0631313	1	1.0,0.973	0.846,0.92	0.103
28235	ENSG00000168769	TET2	chr4	+	106111516	106111662	106068034	106068136	106155053	106163928	28235	11165	0,61	20170	0,31	217	85	0.0631709	1	1.0,0.514	1.0,0.682	-0.084
46707	ENSG00000174516	PELI3	chr11	+	66236303	66236375	66235598	66235751	66238712	66238842	46707	0,21	2,16	1,62	0,21	130	85	0.0631824	1	0.0,0.462	1.0,0.659	-0.599
41118	ENSG00000153207	AHCTF1	chr1	-	247007096	247007230	247005995	247006078	247012916	247014744	41118	20159	0,18	39175	0,5	196	76	0.0632015	1	1.0,0.774	1.0,0.931	-0.079
70015	ENSG00000111412	C12orf49	chr12	-	117160871	117161028	117158100	117158252	117175594	117175866	70015	21424	1,70	10558	0,41	228	85	0.0633884	1	0.887,0.693	1.0,0.835	-0.127
9520	ENSG00000134690	CDCA8	chr1	+	38161581	38161622	38158089	38158456	38164576	38164649	9520	9,69	0,0	3,52	0,8	49	66	0.0634398	1	1.0,1.0	1.0,0.897	0.051
50120	ENSG00000198911	SREBF2	chr22	+	42296023	42296126	42295240	42295557	42296333	42296502	50120	12135	2,9	11455	0,4	174	85	0.0634398	1	0.746,0.88	1.0,0.982	-0.178
62777	ENSG00000164077	MON1A	chr3	-	49948958	49949444	49947551	49948317	49950652	49950792	62777	32501	2,29	20875	0,20	557	85	0.0634482	1	0.709,0.725	1.0,0.87	-0.218
42248	ENSG00000197694	SPTAN1	chr9	+	131371152	131371256	131370408	131370555	131371400	131371568	42248	591249	0,1	91030	2,0	175	85	0.0635318	1	1.0,0.998	0.686,1.0	0.156
32294	ENSG00000197008	ZNF138	chr7	+	64275949	64276031	64275295	64275422	64291828	64293705	32294	2,29	2,20	1,14	8,21	150	85	0.0636112	1	0.362,0.451	0.066,0.274	0.236
45270	ENSG00000100526	CDKN3	chr14	+	54866611	54866694	54863720	54863795	54868241	54868297	45270	9208	6,72	16269	3,51	99	32	0.0639298	1	0.327,0.483	0.633,0.63	-0.226
2498	ENSG00000131931	THAP1	chr8	-	42694328	42694524	42691816	42693479	42698166	42698468	2498	36124	0,6	25101	2,13	267	85	0.0639663	1	1.0,0.868	0.799,0.712	0.178
29789	ENSG00000236656	none_found	chr1	-	158449694	158451592	158444243	158444457	158464191	158464676	29789	99749	50132	671365	27108	1969	85	0.0640177	1	0.079,0.197	0.097,0.353	-0.087
54217	ENSG00000101040	ZMYND8	chr20	-	45891028	45891172	45878030	45878183	45905057	45905539	54217	3,82	0,7	2111	1,0	215	85	0.0641179	1	1.0,0.822	0.442,1.0	0.19
49814	ENSG00000119720	C14orf102	chr14	-	90769063	90769469	90767582	90767716	90770278	90770726	49814	27283	0,1	6214	0,8	477	85	0.064187	1	1.0,0.981	1.0,0.827	0.077
1887	ENSG00000085382	HACE1	chr6	-	105280916	105281048	105244803	105244900	105297016	105297121	1887	2,83	2,6	1,94	0,0	203	85	0.0642274	1	0.295,0.853	1.0,1.0	-0.426
56644	ENSG00000164118	CEP44	chr4	+	175219116	175219213	175205119	175205291	175220222	175220361	56644	8150	2,24	7152	1,8	170	85	0.0642287	1	0.667,0.758	0.778,0.905	-0.129
31815	ENSG00000123562	MORF4L2	chrX	-	102939608	102939657	102933426	102933528	102940098	102940188	31815	6164	28299	8305	36332	82	83	0.0643181	1	0.178,0.357	0.184,0.482	-0.066
66382	ENSG00000163281	GNPDA2	chr4	-	44720325	44720427	44719129	44719312	44728490	44728540	66382	9,69	2,13	11,81	0,5	131	43	0.0644492	1	0.596,0.635	1.0,0.842	-0.306
50785	ENSG00000064115	TM7SF3	chr12	-	27156168	27156323	27149674	27149795	27167010	27167317	50785	21986	2,96	32830	3,29	226	85	0.0644544	1	0.798,0.794	0.8,0.915	-0.062
14981	ENSG00000178295	GEN1	chr2	+	17952462	17952554	17952342	17952365	17953900	17954051	14981	3,51	0,1	4,64	0,14	101	16	0.0644615	1	1.0,0.89	1.0,0.42	0.235
33464	ENSG00000254469	none_found	chr11	-	71634354	71634521	71629930	71630072	71639494	71639670	33464	1,10	0,9	3,27	0,6	238	85	0.0644888	1	1.0,0.284	1.0,0.616	-0.166
37077	ENSG00000110852	CLEC2B	chr12	-	10015097	10015172	10009499	10010236	10021803	10021985	37077	7,49	1,17	1,47	0,3	136	85	0.06454	1	0.814,0.643	1.0,0.907	-0.225
5303	ENSG00000204653	ASPDH	chr19	-	51015917	51016067	51015616	51015837	51016183	51016268	5303	3,28	1,2	3,17	3,7	214	78	0.0645474	1	0.522,0.836	0.267,0.47	0.311
25257	ENSG00000234545	FAM133B	chr7	-	92195327	92195375	92191595	92191682	92199136	92199229	25257	18264	1,46	15224	0,9	77	80	0.0645531	1	0.949,0.856	1.0,0.963	-0.079
10921	ENSG00000160570	DEDD2	chr19	-	42720831	42721197	42702751	42703981	42721783	42721813	10921	29795	0,35	21880	0,9	375	23	0.0646505	1	1.0,0.582	1.0,0.857	-0.138
42788	ENSG00000186104	CYP2R1	chr11	-	14911977	14912015	14907321	14907463	14912445	14913197	42788	2,18	0,7	0,10	1,9	62	85	0.0646512	1	1.0,0.779	0.0,0.604	0.587
72280	ENSG00000179950	PUF60	chr8	-	144906482	144906566	144903987	144904083	144911449	144911469	72280	29653	2104	11892	1254	82	13	0.0646931	1	0.697,0.499	0.636,0.358	0.101
13500	ENSG00000232021	none_found	chr4	+	109096947	109097149	109094574	109094675	109097445	109097586	13500	30,52	8,20	23,66	1,12	273	85	0.0648922	1	0.539,0.447	0.877,0.631	-0.261
25443	ENSG00000163374	YY1AP1	chr1	-	155650172	155650247	155649199	155649303	155657861	155658085	25443	2,45	1,48	1,33	0,15	136	85	0.0649226	1	0.556,0.369	1.0,0.579	-0.327
63669	ENSG00000004455	AK2	chr1	-	33477048	33477311	33476231	33476434	33477674	33477723	63669	13138	1,2	9124	0,12	291	42	0.0649526	1	0.652,0.909	1.0,0.599	-0.019
24306	ENSG00000139350	NEDD1	chr12	+	97311398	97311515	97301381	97301402	97313762	97313896	24306	23,80	0,15	24,88	0,3	117	14	0.0649553	1	1.0,0.39	1.0,0.778	-0.194
16858	ENSG00000126768	TIMM17B	chrX	-	48752634	48752737	48752321	48752384	48754041	48754141	16858	6,72	121972	10142	34999	145	56	0.064986	1	0.019,0.028	0.102,0.052	-0.054
55457	ENSG00000107902	LHPP	chr10	+	126176990	126177144	126150403	126150556	126186604	126186697	55457	2,30	0,18	4,14	0,1	225	85	0.0650662	1	1.0,0.386	1.0,0.841	-0.227
1731	ENSG00000014641	MDH1	chr2	+	63821621	63821720	63815742	63816180	63824532	63824708	1731	441292	6196	601257	8,56	170	85	0.0651902	1	0.786,0.767	0.789,0.918	-0.077
54645	ENSG00000198730	CTR9	chr11	+	10777224	10777342	10776504	10776744	10778295	10778385	54645	6163	0,9	13214	0,0	187	83	0.0652365	1	1.0,0.889	1.0,1.0	-0.055
71997	ENSG00000149925	ALDOA	chr16	+	30066492	30066648	30064784	30064820	30075049	30075569	71997	8,73	0,8	3,71	0,24	171	29	0.0652626	1	1.0,0.607	1.0,0.334	0.136
16556	ENSG00000179361	ARID3B	chr15	+	74865472	74865545	74865202	74865274	74882160	74882344	16556	6,94	2,26	4103	0,12	112	65	0.0652889	1	0.635,0.677	1.0,0.833	-0.26
62137	ENSG00000138380	ALS2CR8	chr2	+	203807462	203807690	203782599	203782766	203817281	203817402	62137	10100	2,24	21153	2,16	299	85	0.0655912	1	0.587,0.542	0.749,0.731	-0.176
26473	ENSG00000151881	C5orf28	chr5	-	43454556	43454707	43453759	43454145	43483923	43483993	26473	0,0	3,38	0,14	4,49	200	63	0.0658788	1	0.0,0.0	0.0,0.083	-0.042
39562	ENSG00000173264	GPR137	chr11	+	64055811	64055940	64052725	64052852	64056508	64056972	39562	8,66	0,0	2,57	1,5	200	85	0.0658938	1	1.0,1.0	0.459,0.829	0.356
72307	ENSG00000149187	CELF1	chr11	-	47493549	47493654	47491845	47492107	47493742	47493909	72307	15279	0,13	23177	3,22	176	85	0.0659005	1	1.0,0.912	0.787,0.795	0.165
59985	ENSG00000149262	INTS4	chr11	-	77698574	77698744	77692504	77692622	77702153	77702345	59985	0,4	6,62	10,4	3,85	241	85	0.0659789	1	0.0,0.022	0.54,0.016	-0.267
35641	ENSG00000153786	ZDHHC7	chr16	-	85022368	85022479	85015475	85015600	85023909	85024241	35641	3,75	8147	7,88	2107	182	85	0.0659832	1	0.149,0.192	0.62,0.278	-0.279
71903	ENSG00000136147	PHF11	chr13	+	50071191	50071353	50070119	50070231	50087194	50087302	71903	0,13	2,65	0,22	1,33	233	85	0.0660147	1	0.0,0.068	0.0,0.196	-0.064
68020	ENSG00000181472	ZBTB2	chr6	-	151694599	151694784	151685251	151688027	151712554	151712683	68020	2120	0,17	6115	0,5	256	85	0.0660632	1	1.0,0.701	1.0,0.884	-0.091
12572	ENSG00000108509	CAMTA2	chr17	-	4880352	4880487	4877679	4877795	4881798	4881925	12572	19650	0,58	11625	2107	206	85	0.066159	1	1.0,0.822	0.694,0.707	0.211
2417	ENSG00000165113	GKAP1	chr9	-	86407865	86407932	86403515	86403593	86414099	86414243	2417	0,21	19,97	0,28	10,50	106	71	0.0661723	1	0.0,0.127	0.0,0.273	-0.073
62314	ENSG00000156639	ZFAND3	chr6	+	38050167	38050233	38029368	38029551	38084347	38084515	62314	34348	2,36	21273	0,4	118	85	0.0662651	1	0.925,0.874	1.0,0.98	-0.091
63034	ENSG00000197892	KIF13B	chr8	-	28932797	28932860	28929136	28929833	28956649	28956758	63034	2,11	0,4	1,36	1,1	112	85	0.0662884	1	1.0,0.676	0.431,0.965	0.14
32664	ENSG00000067177	PHKA1	chrX	-	71840574	71840751	71839063	71839155	71842958	71843125	32664	9181	0,10	10169	0,0	248	85	0.0664242	1	1.0,0.861	1.0,1.0	-0.07
12650	ENSG00000132334	PTPRE	chr10	+	129854386	129854477	129847828	129847930	129859202	129859279	12650	3,38	0,16	3,44	0,5	153	70	0.0664425	1	1.0,0.521	1.0,0.801	-0.14
8970	ENSG00000158161	EYA3	chr1	-	28354299	28354437	28343664	28343750	28362054	28362191	8970	11,77	3,86	14107	4,54	203	79	0.0665198	1	0.588,0.258	0.577,0.435	-0.083
62143	ENSG00000138380	ALS2CR8	chr2	+	203789079	203789138	203782599	203782766	203806582	203806703	62143	0,7	1,27	1,1	2,47	104	85	0.0665542	1	0.0,0.175	0.29,0.017	-0.066
29018	ENSG00000131263	RLIM	chrX	-	73832416	73832478	73815643	73815835	73834256	73834452	29018	7,63	9290	0,20	7200	110	85	0.0666034	1	0.375,0.144	0.0,0.072	0.224
10664	ENSG00000182646	FAM156A	chrX	-	52986285	52986321	52985470	52985544	52987601	52987643	10664	3,90	0,12	3,52	0,32	11	17	0.0667026	1	1.0,0.921	1.0,0.715	0.103
32903	ENSG00000196586	MYO6	chr6	+	76621388	76621415	76618212	76618344	76623779	76623998	32903	0,10	2,39	0,2	3,36	40	85	0.0667839	1	0.0,0.353	0.0,0.106	0.124
7092	ENSG00000135336	ORC3	chr6	+	88360890	88361110	88346124	88346204	88362833	88362967	7092	0,12	3,38	0,0	2,34	279	73	0.0667935	1	0.0,0.076	0.0,0.0	0.038
24230	ENSG00000060339	CCAR1	chr10	+	70516029	70516240	70515126	70515293	70517050	70517134	24230	59604	4,30	33585	0,8	274	77	0.0669486	1	0.806,0.85	1.0,0.954	-0.149
28657	ENSG00000116209	TMEM59	chr1	-	54511364	54511459	54509045	54509198	54518672	54519111	28657	26632	0,106	44508	0,36	170	85	0.0669611	1	1.0,0.749	1.0,0.876	-0.063
31137	ENSG00000092439	TRPM7	chr15	-	50955163	50955243	50949977	50950016	50978727	50979012	31137	2,89	0,6	4,91	0,0	93	32	0.066967	1	1.0,0.836	1.0,1.0	-0.082
503	ENSG00000047249	ATP6V1H	chr8	-	54723723	54723777	54714358	54714456	54727221	54727326	503	10,87	0,27	12,97	0,10	94	85	0.0670301	1	1.0,0.744	1.0,0.898	-0.077
22790	ENSG00000067221	STOML1	chr15	-	74281448	74281598	74280939	74281143	74282691	74282798	22790	10,85	4,18	8121	3,8	221	85	0.0671916	1	0.49,0.645	0.506,0.853	-0.112
68246	ENSG00000138069	RAB1A	chr2	-	65316072	65316204	65315004	65315824	65325104	65325200	68246	36322	4,33	40343	3,11	203	85	0.0672299	1	0.79,0.803	0.848,0.929	-0.092
2887	ENSG00000075702	WDR62	chr19	+	36582101	36582213	36580086	36580208	36583590	36583713	2887	2,49	0,57	2,44	0,19	183	85	0.0673315	1	1.0,0.285	1.0,0.518	-0.117
5366	ENSG00000156304	SCAF4	chr21	-	33073307	33073484	33068881	33069063	33074088	33074231	5366	991126	2,58	1101143	2,3	248	85	0.0675331	1	0.944,0.869	0.95,0.992	-0.065
54074	ENSG00000180964	TCEAL8	chrX	-	102509532	102509605	102507922	102508945	102510005	102510131	54074	12168	3,63	10184	2,34	132	85	0.0675717	1	0.72,0.632	0.763,0.777	-0.094
40644	ENSG00000075826	SEC31B	chr10	-	102249764	102250079	102249459	102249518	102250462	102250640	40644	7919	0,1	11755	0,19	353	52	0.0676019	1	1.0,0.993	1.0,0.854	0.069
27369	ENSG00000113360	DROSHA	chr5	-	31515560	31515671	31515094	31515326	31526185	31526433	27369	11395	0,25	5469	0,68	182	85	0.0676548	1	1.0,0.881	1.0,0.763	0.059
234	ENSG00000124160	NCOA5	chr20	-	44708025	44708092	44698848	44699175	44718455	44718591	234	3,92	6,50	1168	0,50	120	85	0.0676766	1	0.262,0.566	1.0,0.704	-0.438
10948	ENSG00000217555	CKLF,CKLF-CMTM1	chr16	+	66592092	66592251	66586484	66586696	66597024	66597120	10948	971300	621241	851844	331215	230	85	0.0677058	1	0.366,0.279	0.488,0.359	-0.101
780	ENSG00000165304	MELK	chr9	+	36594624	36594768	36589532	36589649	36597218	36597287	780	11337	8188	26383	4142	192	62	0.0678975	1	0.307,0.367	0.677,0.466	-0.235
893	ENSG00000135250	SRPK2	chr7	-	104767439	104767509	104757834	104758469	104773237	104773345	893	4216	1,58	7211	0,28	126	85	0.0680353	1	0.73,0.715	1.0,0.836	-0.196
31816	ENSG00000123562	MORF4L2	chrX	-	102933426	102933577	102930432	102931979	102940098	102941149	31816	113649	4169	50501	0,72	222	85	0.0682275	1	0.915,0.595	1.0,0.727	-0.108
8576	ENSG00000118939	UCHL3	chr13	+	76164073	76164265	76143595	76143643	76169050	76169126	8576	0,1	5,28	3,11	1,27	203	25	0.0683844	1	0.0,0.004	0.27,0.048	-0.157
46287	ENSG00000179454	KLHL28	chr14	-	45400535	45400744	45398015	45398394	45403317	45403761	46287	37441	1,39	21288	0,0	280	85	0.0683872	1	0.918,0.774	1.0,1.0	-0.154
44865	ENSG00000152219	C11orf46	chr11	+	30352432	30352921	30344597	30344749	30354412	30354540	44865	86735	4,21	66726	0,6	560	85	0.0684172	1	0.765,0.842	1.0,0.948	-0.17
58706	ENSG00000213020	ZNF611	chr19	-	53219084	53219166	53206065	53210117	53238253	53238297	58706	0,3	2,2	2,5	0,0	102	37	0.0684188	1	0.0,0.352	1.0,1.0	-0.824
3969	ENSG00000064961	HMG20B	chr19	+	3575499	3575658	3574367	3574584	3576550	3576623	3969	10236	1,0	2211	0,9	211	66	0.0685076	1	0.758,1.0	1.0,0.88	-0.061
10085	ENSG00000158435	C2orf29	chr2	+	101874252	101874417	101869263	101869940	101879000	101879153	10085	42306	3,49	46403	2,29	236	85	0.0685174	1	0.835,0.692	0.892,0.833	-0.099
47472	ENSG00000197622	CDC42SE1	chr1	-	151029131	151029262	151027491	151027602	151031954	151032249	47472	2,59	0,5	4208	0,3	202	85	0.0685329	1	1.0,0.832	1.0,0.967	-0.068
69336	ENSG00000151287	C13orf27	chr13	-	103421660	103421891	103420609	103420661	103426031	103426105	69336	50288	1,9	38289	0,1	244	27	0.0685507	1	0.847,0.78	1.0,0.97	-0.172
39615	ENSG00000205664	none_found	chrX	-	3736482	3736541	3735568	3735819	3746546	3746900	39615	3,32	0,33	7,59	1,15	104	85	0.068635	1	1.0,0.442	0.851,0.763	-0.086
25202	ENSG00000196074	SYCP2	chr20	-	58441347	58441447	58440861	58440920	58441549	58441644	25202	16,48	0,0	4,21	0,2	138	52	0.0686389	1	1.0,1.0	1.0,0.798	0.101
5404	ENSG00000104325	DECR1	chr8	+	91017675	91018073	91013704	91013789	91031136	91031194	5404	10123	3,21	4175	1,9	428	44	0.0688847	1	0.255,0.376	0.291,0.667	-0.163
59983	ENSG00000149262	INTS4	chr11	-	77629076	77629310	77618762	77618856	77629866	77630024	59983	0,0	10,79	1,11	6,72	305	85	0.0689823	1	0.0,0.0	0.044,0.041	-0.042
6077	ENSG00000112715	VEGFA	chr6	+	43748468	43748540	43746625	43746655	43749692	43749824	6077	4,59	5113	3,47	1,43	68	23	0.0690665	1	0.213,0.15	0.504,0.27	-0.206
49083	ENSG00000103326	SOLH	chr16	+	586028	586142	583945	583998	596816	598287	49083	3,56	3,40	1124	0,43	146	46	0.0690952	1	0.24,0.306	1.0,0.476	-0.465
5352	ENSG00000106610	none_found	chr7	+	66773563	66773639	66770973	66771070	66773921	66774126	5352	2,33	3,63	4,45	2,44	138	85	0.0691067	1	0.291,0.244	0.552,0.386	-0.202
31821	ENSG00000123562	MORF4L2	chrX	-	102933426	102933548	102931753	102931979	102940098	102940188	31821	108657	4169	51508	0,72	191	83	0.0691801	1	0.921,0.628	1.0,0.754	-0.103
44698	ENSG00000149503	INCENP	chr11	+	61908971	61908983	61908384	61908516	61912453	61912563	44698	2207	8154	3190	0,174	10	85	0.0691859	1	0.68,0.92	1.0,0.903	-0.151
7826	ENSG00000157014	TATDN2	chr3	+	10320347	10320444	10319962	10320146	10320568	10320718	7826	18229	9126	11126	13109	170	85	0.0692295	1	0.5,0.476	0.297,0.366	0.156
26126	ENSG00000092020	PPP2R3C	chr14	-	35564253	35564390	35554672	35554984	35565763	35565839	26126	9,22	0,4	6,44	0,0	192	69	0.0692779	1	1.0,0.664	1.0,1.0	-0.168
49594	ENSG00000130830	MPP1	chrX	-	154018228	154018297	154014478	154014675	154033546	154033760	49594	9131	0,17	7131	0,2	124	85	0.0693009	1	1.0,0.841	1.0,0.978	-0.069
63838	ENSG00000113240	CLK4	chr5	-	178032825	178032866	178032303	178032383	178035376	178035459	63838	0,2	3,66	0,5	6,20	47	64	0.0693193	1	0.0,0.04	0.0,0.254	-0.107
18570	ENSG00000131373	HACL1	chr3	-	15628031	15628109	15624383	15624496	15631046	15631119	18570	5,17	0,7	3,25	0,1	123	66	0.0696039	1	1.0,0.566	1.0,0.931	-0.183
68945	ENSG00000106868	SUSD1	chr9	-	114804380	114804445	114804146	114804240	114814678	114814718	68945	0,1	4,4	1,3	0,2	64	33	0.0696217	1	0.0,0.114	1.0,0.436	-0.661
62789	ENSG00000112290	WASF1	chr6	-	110499800	110499945	110448671	110448832	110501043	110501126	62789	4,26	0,4	10,88	0,3	207	76	0.0696693	1	1.0,0.705	1.0,0.915	-0.105
15176	ENSG00000147124	ZNF41	chrX	-	47326808	47327159	47315670	47315797	47341857	47342345	15176	10121	0,15	4173	0,3	422	85	0.0697853	1	1.0,0.619	1.0,0.921	-0.151
68090	ENSG00000162639	HENMT1	chr1	-	109197337	109197472	109193651	109193831	109200072	109200201	68090	14147	0,10	26245	0,2	206	85	0.0699267	1	1.0,0.858	1.0,0.981	-0.061
32515	ENSG00000189376	ZHX1-C8ORF76,C8orf76	chr8	-	124250037	124250181	124232434	124232537	124253469	124253584	32515	9,51	0,8	3,45	0,0	215	85	0.0699402	1	1.0,0.716	1.0,1.0	-0.142
50496	ENSG00000165115	KIF27	chr9	-	86482598	86482775	86468543	86468750	86485433	86485547	50496	15107	0,5	0,81	1,8	248	85	0.0699836	1	1.0,0.88	0.0,0.776	0.552
45874	ENSG00000122591	FAM126A	chr7	-	23004033	23004150	22999874	23000034	23015828	23015924	45874	14,30	1,5	6,44	0,0	188	85	0.070004	1	0.864,0.731	1.0,1.0	-0.203
70950	ENSG00000132005	RFX1	chr19	-	14104336	14104707	14094297	14094407	14116914	14117134	70950	12162	0,0	12279	0,12	442	85	0.0700336	1	1.0,1.0	1.0,0.817	0.092
29903	ENSG00000204564	C6orf136	chr6	+	30618770	30618859	30614940	30615080	30619042	30619243	29903	6,92	0,14	7,94	0,3	164	85	0.0701321	1	1.0,0.773	1.0,0.942	-0.084
25500	ENSG00000152969	JAKMIP1	chr4	-	6107199	6107694	6087146	6087356	6114448	6114724	25500	551596	0,24	161750	2,56	566	85	0.0702655	1	1.0,0.909	0.546,0.824	0.269
47653	ENSG00000145687	SSBP2	chr5	-	80911291	80911376	80809446	80809536	80946085	80946158	47653	20337	0,36	28454	0,14	135	64	0.0703278	1	1.0,0.816	1.0,0.939	-0.062
60184	ENSG00000134324	LPIN1	chr2	+	11916211	11916319	11913745	11913871	11919644	11919771	60184	0,9	3,52	0,0	5,67	179	85	0.07035	1	0.0,0.076	0.0,0.0	0.038
10389	ENSG00000090006	LTBP4	chr19	+	41128854	41128926	41128305	41128572	41129508	41129637	10389	24700	6203	7791	5353	130	85	0.0704002	1	0.723,0.693	0.478,0.594	0.172
40939	ENSG00000177150	FAM210A	chr18	-	13681603	13682104	13663345	13666712	13726327	13726591	40939	59616	0,73	66509	0,23	572	85	0.0704084	1	1.0,0.556	1.0,0.767	-0.105
4868	ENSG00000103194	USP10	chr16	+	84773914	84773975	84733617	84733717	84778238	84779279	4868	10250	0,157	16251	0,34	108	85	0.0706205	1	1.0,0.556	1.0,0.853	-0.148
58623	ENSG00000172869	DMXL1	chr5	+	118407249	118407351	118406899	118406952	118433673	118433799	58623	2230	0,0	2156	0,8	134	46	0.0708577	1	1.0,1.0	1.0,0.87	0.065
64818	ENSG00000107077	KDM4C	chr9	+	6981841	6982765	6980924	6981118	6984165	6984404	64818	2,32	1,73	2,76	0,50	995	85	0.0709296	1	0.146,0.036	1.0,0.115	-0.467
35242	ENSG00000162337	LRP5	chr11	+	68213040	68213154	68207340	68207384	68213903	68214001	35242	0,5	4,67	0,21	1,57	137	37	0.0709939	1	0.0,0.02	0.0,0.09	-0.035
70513	ENSG00000204568	MRPS18B	chr6	+	30590608	30590675	30587269	30587766	30592659	30592719	70513	14227	1,17	17339	0,3	88	53	0.071009	1	0.894,0.889	1.0,0.986	-0.102
19916	ENSG00000151806	GUF1	chr4	+	44690023	44690163	44688526	44688730	44691302	44691426	19916	7,98	7,46	6133	4,31	211	85	0.0711168	1	0.287,0.462	0.377,0.633	-0.131
54748	ENSG00000198833	UBE2J1	chr6	-	90042804	90042924	90036343	90039676	90045020	90045150	54748	41333	4,17	52399	0,6	191	85	0.0713469	1	0.82,0.897	1.0,0.967	-0.125
37597	ENSG00000127663	KDM4B	chr19	+	5032876	5033042	5016267	5016350	5039846	5040022	37597	6791	7,55	18645	0,16	228	76	0.0714424	1	0.222,0.827	1.0,0.931	-0.441
11506	ENSG00000135473	PAN2	chr12	-	56712020	56712218	56710720	56711427	56712871	56712965	11506	13931	0,54	23825	0,13	269	85	0.0715872	1	1.0,0.845	1.0,0.953	-0.054
3489	ENSG00000101966	XIAP	chrX	+	122994016	122994143	122993676	122993755	123022468	123022568	3489	3136	1,77	2,83	0,23	185	72	0.0715929	1	0.539,0.407	1.0,0.584	-0.319
7423	ENSG00000182979	MTA1	chr14	+	105915695	105915746	105911754	105911848	105916394	105916521	7423	10208	12329	2216	15430	88	85	0.0716954	1	0.446,0.379	0.114,0.327	0.192
38371	ENSG00000120756	PLS1	chr3	+	142383043	142383149	142315228	142315351	142388231	142388395	38371	13346	0,29	11268	0,3	177	85	0.0717903	1	1.0,0.851	1.0,0.977	-0.063
71888	ENSG00000139116	KIF21A	chr12	-	39711874	39712003	39705218	39705355	39713707	39713815	71888	1,9	4,3	0,2	3,8	200	85	0.0718266	1	0.096,0.56	0.0,0.096	0.28
12828	ENSG00000171634	BPTF	chr17	+	65882243	65882432	65871671	65871860	65887959	65888150	12828	22215	3,29	13238	1,12	260	85	0.0718391	1	0.706,0.708	0.81,0.866	-0.131
34689	ENSG00000114956	DGUOK	chr2	+	74173845	74174033	74154001	74154179	74185272	74185372	34689	1891176	15,90	1891672	5,71	259	85	0.0719137	1	0.805,0.811	0.925,0.885	-0.097
13170	ENSG00000031003	FAM13B	chr5	-	137281916	137282000	137281590	137281686	137284643	137284873	13170	11,53	0,6	8,17	1,6	154	85	0.0719146	1	1.0,0.83	0.815,0.61	0.203
9943	ENSG00000048740	CELF2	chr10	+	11259387	11259470	11207448	11207645	11291115	11291164	9943	27164	0,19	28208	0,0	109	42	0.0719244	1	1.0,0.769	1.0,1.0	-0.115
23083	ENSG00000136068	FLNB	chr3	+	58127584	58127656	58124008	58124256	58128376	58128479	23083	0,36	9513	0,145	10569	130	85	0.0720342	1	0.0,0.044	0.0,0.143	-0.049
72080	ENSG00000123159	GIPC1	chr19	-	14602467	14602555	14591404	14591590	14606848	14606944	72080	5,65	1,12	2161	0,9	162	85	0.0720947	1	0.724,0.74	1.0,0.904	-0.22
40926	ENSG00000134897	BIVM	chr13	+	103457656	103457740	103452750	103453085	103459495	103459750	40926	1,27	0,5	9,21	0,0	154	85	0.0722322	1	1.0,0.749	1.0,1.0	-0.125
33924	ENSG00000015153	YAF2	chr12	-	42565941	42566011	42555414	42555567	42592937	42593037	33924	1,1	0,2	0,0	1,10	126	85	0.0722486	1	1.0,0.252	0.0,0.0	0.626
71169	ENSG00000130714	POMT1	chr9	+	134386723	134386859	134378357	134378460	134390812	134390909	71169	1,61	0,8	4,56	0,1	207	85	0.0722502	1	1.0,0.758	1.0,0.958	-0.1
72269	ENSG00000256525	POLG2	chr17	-	62476405	62476506	62473903	62474105	62479035	62479116	72269	21109	0,11	16,88	0,0	161	74	0.0722561	1	1.0,0.82	1.0,1.0	-0.09
24854	ENSG00000240344	PPIL3	chr2	-	201742219	201742327	201741664	201741760	201746143	201746211	24854	0,101	3207	1123	7,88	155	61	0.0723042	1	0.0,0.161	0.053,0.355	-0.123
16210	ENSG00000083454	P2RX5	chr17	-	3591919	3591970	3591305	3591399	3593363	3593444	16210	5,36	0,2	4,51	0,15	77	74	0.072343	1	1.0,0.945	1.0,0.766	0.089
65013	ENSG00000159593	NAE1	chr16	-	66860425	66860486	66857431	66857503	66864749	66864879	65013	2,5	0,6	1,10	0,1	88	65	0.0724836	1	1.0,0.381	1.0,0.881	-0.25
13814	ENSG00000205758	CRYZL1	chr21	-	34969585	34969707	34968036	34968142	34971455	34971554	13814	11362	0,23	9610	0,3	193	85	0.0725451	1	1.0,0.874	1.0,0.989	-0.057
22164	ENSG00000147854	UHRF2	chr9	+	6492302	6492402	6486870	6486925	6493825	6493932	22164	0,40	29501	5,50	18296	134	48	0.0725638	1	0.0,0.028	0.09,0.057	-0.06
60819	ENSG00000198246	SLC29A3	chr10	+	73103965	73104048	73082512	73082811	73111318	73111545	60819	0,21	1,13	2,34	0,8	152	85	0.07258	1	0.0,0.475	1.0,0.704	-0.615
2161	ENSG00000186469	GNG2	chr14	+	52344334	52344375	52327363	52327508	52417367	52417483	2161	2157	7151	12212	7158	68	85	0.0726415	1	0.263,0.565	0.682,0.626	-0.24
8134	ENSG00000103222	ABCC1	chr16	+	16108347	16108485	16103632	16103758	16126965	16127027	8134	12194	0,11	22172	0,1	179	55	0.0727217	1	1.0,0.844	1.0,0.981	-0.069
16018	ENSG00000188313	PLSCR1	chr3	-	146239330	146239488	146234792	146234954	146243391	146243434	16018	6,23	0,2	14,58	0,0	180	36	0.0727259	1	1.0,0.697	1.0,1.0	-0.151
26413	ENSG00000134909	ARHGAP32	chr11	-	128993782	128993824	128993340	128993425	128994697	128994789	26413	2,6	5,13	1,7	0,6	63	78	0.0727328	1	0.331,0.364	1.0,0.591	-0.448
55779	ENSG00000164828	SUN1	chr7	+	889156	889240	882977	883157	889559	889670	55779	2,81	0,9	1,73	0,0	154	85	0.0727428	1	1.0,0.832	1.0,1.0	-0.084
36105	ENSG00000236624	none_found	chr1	-	45962227	45962295	45961089	45961217	45965016	45965115	36105	1,23	0,3	3,43	0,0	122	85	0.0728439	1	1.0,0.842	1.0,1.0	-0.079
16793	ENSG00000100601	ALKBH1	chr14	-	78161080	78161243	78146222	78146313	78170711	78170795	16793	5,91	0,9	9108	0,2	225	76	0.0728484	1	1.0,0.774	1.0,0.948	-0.087
27266	ENSG00000085224	ATRX	chrX	-	76949312	76949426	76944310	76944420	76952064	76952192	27266	15,96	3,12	12,81	1,2	185	85	0.0728564	1	0.697,0.786	0.846,0.949	-0.156
13865	ENSG00000104093	DMXL2	chr15	-	51747347	51747425	51742325	51742543	51748262	51748390	13865	3,94	2,25	1,87	0,9	142	85	0.0728789	1	0.473,0.692	1.0,0.853	-0.344
47869	ENSG00000115966	ATF2	chr2	-	175976295	175976382	175962171	175962321	175982717	175982846	47869	30228	3,11	35160	0,0	160	85	0.0729156	1	0.842,0.917	1.0,1.0	-0.121
44397	ENSG00000100889	PCK2	chr14	+	24566100	24566346	24563367	24563643	24567411	24567596	44397	6514	2,21	161233	0,14	317	85	0.0729218	1	0.446,0.868	1.0,0.959	-0.323
39571	ENSG00000173264	GPR137	chr11	+	64055192	64055418	64054436	64054486	64055811	64055940	39571	46428	0,4	13359	0,14	255	43	0.0729429	1	1.0,0.947	1.0,0.812	0.068
2598	ENSG00000068354	TBC1D25	chrX	+	48403256	48403411	48398185	48398308	48417545	48417734	2598	2,48	0,10	2,66	0,3	226	85	0.0730072	1	1.0,0.644	1.0,0.892	-0.124
28211	ENSG00000141564	RPTOR	chr17	+	78854214	78854289	78831589	78831700	78865519	78865637	28211	5,48	0,9	4,77	1,2	136	85	0.0730744	1	1.0,0.769	0.714,0.96	0.048
24882	ENSG00000119397	CNTRL	chr9	+	123908385	123908534	123907521	123907663	123912447	123912761	24882	21230	2,15	13145	0,1	220	85	0.07314	1	0.802,0.856	1.0,0.982	-0.162
26689	ENSG00000067445	TRO	chrX	+	54948635	54948724	54947243	54947311	54951421	54951501	26689	1,4	0,1	1,31	0,0	128	49	0.0731575	1	1.0,0.605	1.0,1.0	-0.198
20176	ENSG00000119541	VPS4B	chr18	-	61060641	61060782	61056422	61058309	61067280	61067429	20176	9165	5,10	10178	1,1	212	85	0.0732698	1	0.419,0.869	0.8,0.986	-0.249
70822	ENSG00000173226	IQCB1	chr3	-	121518042	121518221	121508919	121509062	121526190	121526290	70822	7,82	0,15	6,88	0,4	250	85	0.0733059	1	1.0,0.65	1.0,0.882	-0.116
40455	ENSG00000157869	RAB28	chr4	-	13371494	13371589	13369347	13370274	13378168	13378246	40455	7,30	13,68	0,20	11,81	156	71	0.0733202	1	0.197,0.167	0.0,0.101	0.132
53952	ENSG00000138621	PPCDC	chr15	+	75336726	75336855	75315895	75315967	75340893	75341062	53952	10,78	1,8	3250	0,5	180	65	0.073364	1	0.783,0.779	1.0,0.948	-0.193
22136	ENSG00000072736	NFATC3	chr16	+	68255098	68255187	68224670	68225678	68260252	68263162	22136	0,19	15215	2,36	8170	164	85	0.0733762	1	0.0,0.044	0.115,0.099	-0.085
14901	ENSG00000257076	none_found	chr12	-	123710834	123710898	123707584	123707674	123712009	123712163	14901	0,2	22,63	1,6	10,36	112	83	0.0734164	1	0.0,0.023	0.069,0.11	-0.078
9476	ENSG00000050748	MAPK9	chr5	-	179706795	179707036	179696279	179696409	179707439	179707581	9476	24193	22215	24234	16143	312	85	0.0737167	1	0.229,0.197	0.29,0.308	-0.086
59250	ENSG00000071462	WBSCR22	chr7	+	73098096	73098253	73097898	73098003	73100965	73101061	59250	15309	0,1	1391	2,6	228	85	0.0738583	1	1.0,0.991	0.157,0.96	0.437
11310	ENSG00000137145	DENND4C	chr9	+	19328027	19328160	19326061	19326192	19331975	19332182	11310	16,93	0,0	14,45	0,4	204	85	0.0738644	1	1.0,1.0	1.0,0.824	0.088
28231	ENSG00000168769	TET2	chr4	+	106111516	106111643	106067449	106068136	106155053	106158508	28231	9,95	0,61	15,97	0,31	198	85	0.0740366	1	1.0,0.401	1.0,0.573	-0.086
52891	ENSG00000226210	none_found	chr12	+	87871	88017	87556	87703	88569	88771	52891	3,35	0,3	0,19	1,6	217	85	0.0742748	1	1.0,0.82	0.0,0.554	0.633
20302	ENSG00000137807	KIF23	chr15	+	69732242	69732416	69730586	69730744	69737128	69737380	20302	44442	1,32	43365	0,7	245	85	0.0744026	1	0.939,0.827	1.0,0.948	-0.091
58445	ENSG00000103021	CCDC113	chr16	+	58286630	58286757	58283839	58284019	58287901	58288063	58445	2,29	0,5	1,59	0,1	198	85	0.0749607	1	1.0,0.713	1.0,0.962	-0.124
48418	ENSG00000169118	CSNK1G1	chr15	-	64551399	64551440	64508760	64508912	64592517	64592922	48418	1,21	0,6	2,18	0,0	68	85	0.0749917	1	1.0,0.814	1.0,1.0	-0.093
49717	ENSG00000178234	GALNT11	chr7	+	151813988	151814123	151810329	151810483	151814241	151814460	49717	0,6	9114	0,17	3,71	206	85	0.0749976	1	0.0,0.021	0.0,0.09	-0.034
29525	ENSG00000196531	NACA	chr12	-	57113509	57115243	57113320	57113380	57118235	57118307	29525	47456	0,2	37261	0,8	1753	33	0.0750851	1	1.0,0.811	1.0,0.38	0.216
4472	ENSG00000140382	HMG20A	chr15	+	77740060	77740153	77713015	77713346	77750745	77750838	4472	3,15	9140	5,65	15154	170	85	0.0751602	1	0.143,0.051	0.143,0.174	-0.061
46319	ENSG00000124214	STAU1	chr20	-	47782533	47782822	47770469	47770608	47804652	47804904	46319	29106	2,40	13,82	0,12	360	85	0.0751668	1	0.774,0.385	1.0,0.617	-0.229
10702	ENSG00000158941	KIAA1967	chr8	+	22463248	22463344	22462144	22462355	22463597	22463689	10702	571360	0,28	291863	5,71	170	85	0.0751802	1	1.0,0.96	0.744,0.929	0.143
66038	ENSG00000123983	ACSL3	chr2	+	223765391	223765498	223752547	223752606	223773450	223773868	66038	1,39	2,76	3,79	5,44	145	52	0.0752243	1	0.152,0.155	0.177,0.392	-0.131
29413	ENSG00000120008	WDR11	chr10	+	122612035	122612147	122610694	122611018	122618154	122618308	29413	1101	0,0	5101	0,9	183	85	0.0752557	1	1.0,1.0	1.0,0.839	0.081
30654	ENSG00000176853	FAM91A1	chr8	+	124801852	124801985	124799903	124799990	124810329	124810478	30654	15172	0,9	46146	0,0	199	80	0.0752583	1	1.0,0.885	1.0,1.0	-0.057
34344	ENSG00000186868	MAPT	chr17	+	44051750	44051837	44049224	44049311	44055740	44055806	34344	1,3	1,33	0,17	1,31	129	54	0.0754119	1	0.295,0.037	0.0,0.187	0.072
21564	ENSG00000148481	FAM188A	chr10	-	15880226	15880278	15879202	15879317	15883424	15883598	21564	2,13	5,13	1,6	6,18	90	85	0.0754914	1	0.274,0.486	0.136,0.239	0.193
28337	ENSG00000214827	MTCP1,MTCP1NB	chrX	-	154294180	154294332	154293893	154294064	154298968	154299501	28337	1,51	1,4	1,44	1,14	223	85	0.0755463	1	0.276,0.829	0.276,0.545	0.142
10055	ENSG00000148110	HIATL1	chr9	+	97203266	97203381	97200682	97200810	97207245	97207464	10055	34950	3118	451013	4,49	186	85	0.0755595	1	0.838,0.786	0.837,0.904	-0.059
40931	ENSG00000116191	RALGPS2	chr1	+	178861364	178861442	178858776	178858831	178863053	178863159	40931	2,13	3,20	1,24	4,9	105	48	0.0755645	1	0.234,0.229	0.103,0.549	-0.095
21886	ENSG00000173436	MINOS1,C1orf151-NBL1	chr1	+	19948593	19948641	19923483	19923603	19949967	19950077	21886	79427	6,45	52549	10110	82	85	0.0756199	1	0.932,0.908	0.844,0.838	0.079
72339	ENSG00000196655	TRAPPC4	chr11	+	118890859	118890963	118889852	118890027	118892469	118892596	72339	27302	5,22	23492	0,12	175	85	0.0756741	1	0.724,0.87	1.0,0.952	-0.179
29211	ENSG00000093217	XYLB	chr3	+	38411546	38411665	38407098	38407227	38414145	38414227	29211	2,70	0,6	7,98	0,1	180	75	0.0757879	1	1.0,0.829	1.0,0.976	-0.074
66341	ENSG00000152127	none_found	chr2	+	135010665	135010789	134877553	134877862	135011832	135012215	66341	4,29	0,4	1,26	0,12	195	85	0.0758479	1	1.0,0.76	1.0,0.486	0.137
69701	ENSG00000121671	CRY2	chr11	+	45883610	45883699	45882398	45882583	45889162	45889303	69701	1151	0,12	5270	0,3	164	85	0.0758484	1	1.0,0.867	1.0,0.979	-0.056
38995	ENSG00000214021	TTLL3,ARPC4-TTLL3	chr3	+	9857757	9857886	9854626	9854795	9862229	9862425	38995	4,69	0,0	4,39	0,4	200	85	0.0759452	1	1.0,1.0	1.0,0.806	0.097
31058	ENSG00000139436	GIT2	chr12	-	110385060	110385309	110376969	110377052	110388971	110389121	31058	4106	2,4	2189	0,0	311	76	0.0759881	1	0.328,0.866	1.0,1.0	-0.403
40508	ENSG00000099968	BCL2L13	chr22	+	18178906	18178976	18165979	18166087	18185008	18185152	40508	5,34	3,4	13,85	0,5	126	85	0.0759985	1	0.529,0.852	1.0,0.92	-0.269
25376	ENSG00000093009	CDC45	chr22	+	19470212	19470350	19468475	19468568	19471384	19471528	25376	45984	7171	271077	4,89	209	85	0.0761931	1	0.723,0.701	0.733,0.831	-0.07
34209	ENSG00000116918	TSNAX	chr1	+	231699210	231699375	231696873	231697001	231700273	231702270	34209	2,82	9,83	0,49	9,96	236	85	0.0762263	1	0.074,0.262	0.0,0.155	0.091
1740	ENSG00000133703	KRAS	chr12	-	25380167	25380346	25378547	25378707	25398207	25398329	1740	33491	0,22	61456	0,1	250	85	0.0762973	1	1.0,0.884	1.0,0.994	-0.055
35270	ENSG00000228696	ARL17B,ARL17A	chr17	-	44435615	44435780	44430185	44430296	44439041	44439163	35270	3,75	0,4	6138	0,0	236	85	0.0764745	1	1.0,0.871	1.0,1.0	-0.065
10216	ENSG00000174799	CEP135	chr4	+	56825847	56825932	56823388	56823530	56831809	56832746	10216	11,73	0,8	1,63	0,0	156	85	0.0765898	1	1.0,0.833	1.0,1.0	-0.084
36448	ENSG00000141644	MBD1	chr18	-	47797838	47797910	47793886	47794033	47799046	47799108	36448	10107	0,21	3,92	1,36	100	55	0.0766289	1	1.0,0.737	0.623,0.584	0.265
53021	ENSG00000100629	none_found	chr14	-	81408627	81408724	81405728	81405884	81425775	81425848	53021	25427	4,98	4120	0,10	151	66	0.0767306	1	0.732,0.656	1.0,0.84	-0.226
20117	ENSG00000151413	NUBPL	chr14	+	32315676	32315797	32295834	32295920	32328323	32330430	20117	5,18	1,4	5,21	0,0	186	79	0.0770646	1	0.68,0.657	1.0,1.0	-0.331
22995	ENSG00000100731	PCNX	chr14	+	71476350	71476441	71443658	71445365	71479716	71479919	22995	7,18	0,4	3,13	3,7	168	85	0.0770855	1	1.0,0.695	0.336,0.484	0.437
47708	ENSG00000100227	POLDIP3	chr22	-	42997975	42998062	42995703	42995799	42998775	42999166	47708	17418	6357	29593	10206	160	85	0.0771292	1	0.601,0.383	0.606,0.605	-0.113
488	ENSG00000177426	TGIF1	chr18	+	3450319	3450503	3449879	3450068	3456351	3456578	488	10,99	1,11	3154	0,1	255	85	0.0771769	1	0.769,0.75	1.0,0.981	-0.231
29680	ENSG00000175416	CLTB	chr5	-	175833157	175833709	175824930	175825048	175837257	175837304	29680	1,20	23108	6,87	6151	578	40	0.0772291	1	0.003,0.013	0.065,0.038	-0.044
52699	ENSG00000177565	TBL1XR1	chr3	-	176782707	176782810	176771560	176771706	176914908	176915040	52699	36575	0,40	56400	0,2	174	85	0.0773382	1	1.0,0.875	1.0,0.99	-0.057
11389	ENSG00000058056	USP13	chr3	+	179418795	179418917	179399665	179399791	179424721	179424864	11389	3,82	0,7	5,67	0,0	193	85	0.0774444	1	1.0,0.838	1.0,1.0	-0.081
43757	ENSG00000178917	none_found	chr3	-	44544033	44544160	44540461	44542126	44552044	44552128	43757	2144	0,17	5222	0,9	190	77	0.0774519	1	1.0,0.774	1.0,0.909	-0.068
50897	ENSG00000004534	RBM6	chr3	+	50036872	50036946	50012755	50012825	50085677	50085752	50897	7,76	4,55	3,89	0,34	95	46	0.0774895	1	0.459,0.401	1.0,0.559	-0.35
39563	ENSG00000173264	GPR137	chr11	+	64055536	64055686	64054436	64054486	64055811	64055940	39563	28347	0,4	10284	0,14	179	43	0.0777369	1	1.0,0.954	1.0,0.83	0.062
31473	ENSG00000140396	NCOA2	chr8	-	71056876	71057083	71053418	71053634	71060507	71060718	31473	15,72	2,19	10131	0,15	278	85	0.0777904	1	0.696,0.537	1.0,0.728	-0.247
35727	ENSG00000118369	USP35	chr11	+	77907281	77907964	77899952	77900203	77908981	77909114	35727	9235	0,0	2226	0,6	754	85	0.0778461	1	1.0,1.0	1.0,0.809	0.095
2445	ENSG00000038219	BOD1L	chr4	-	13598727	13598792	13597483	13597568	13600569	13606708	2445	9,66	0,11	6,81	0,1	109	78	0.077916	1	1.0,0.811	1.0,0.983	-0.086
20687	ENSG00000163913	IFT122	chr3	+	129185732	129185909	129183477	129183624	129188184	129188260	20687	4,70	5108	0,45	3146	232	69	0.0779828	1	0.192,0.162	0.0,0.084	0.135
69948	ENSG00000070081	NUCB2	chr11	+	17352448	17352530	17336932	17337022	17370891	17371509	69948	1,52	1,3	18132	0,4	148	83	0.0780065	1	0.359,0.907	1.0,0.949	-0.341
22392	ENSG00000148337	CIZ1	chr9	-	130931901	130931979	130931684	130931798	130932298	130932386	22392	1,13	55482	6,28	25362	138	81	0.0780759	1	0.011,0.016	0.123,0.043	-0.069
17265	ENSG00000250571	GLI4	chr8	+	144351529	144351690	144349606	144349654	144356873	144356972	17265	18304	3,12	16607	0,5	188	41	0.0781292	1	0.567,0.847	1.0,0.964	-0.275
24330	ENSG00000104756	KCTD9	chr8	-	25303644	25303766	25298092	25298189	25315714	25315983	24330	14243	0,14	7248	0,35	193	85	0.078133	1	1.0,0.884	1.0,0.757	0.063
68387	ENSG00000150401	DCUN1D2	chr13	-	114128438	114128569	114115368	114115451	114144981	114145006	68387	8,60	0,0	2,38	0,4	126	9	0.0781865	1	1.0,1.0	1.0,0.404	0.298
43377	ENSG00000149328	GLB1L2	chr11	+	134237150	134237235	134234221	134234292	134238537	134238675	43377	7123	0,2	0,137	1,10	135	64	0.0782462	1	1.0,0.967	0.0,0.867	0.55
67105	ENSG00000131323	TRAF3	chr14	+	103363597	103363738	103342694	103342862	103369591	103369766	67105	17119	0,12	16102	0,1	212	85	0.0783013	1	1.0,0.799	1.0,0.976	-0.089
27946	ENSG00000100142	none_found	chr22	+	38382160	38382319	38363105	38363177	38437074	38437113	27946	0,0	2,30	2,6	0,12	157	12	0.0784946	1	0.0,0.0	1.0,0.037	-0.519
16017	ENSG00000188313	PLSCR1	chr3	-	146239330	146239492	146234792	146234954	146243391	146243434	16017	7,23	0,2	14,59	0,0	184	36	0.0785229	1	1.0,0.692	1.0,1.0	-0.154
40507	ENSG00000099968	BCL2L13	chr22	+	18178906	18178976	18171751	18171908	18209442	18211465	40507	12,56	0,15	29103	0,10	126	85	0.078523	1	1.0,0.716	1.0,0.874	-0.079
31946	ENSG00000188895	MSL1	chr17	+	38287789	38287837	38285497	38285880	38288286	38288351	31946	11105	1,34	11,75	1,8	55	58	0.0786182	1	0.921,0.765	0.921,0.908	-0.072
34953	ENSG00000100429	HDAC10	chr22	-	50687531	50687597	50687090	50687180	50687756	50687883	34953	14,64	4,5	0,132	1,29	116	83	0.0786288	1	0.715,0.902	0.0,0.765	0.426
60532	ENSG00000172244	C5orf34	chr5	-	43508678	43508768	43505849	43506496	43514907	43515180	60532	10,35	0,5	1,24	0,10	166	85	0.078665	1	1.0,0.782	1.0,0.551	0.115
52724	ENSG00000172890	NADSYN1	chr11	+	71171086	71171259	71169473	71169590	71171767	71171993	52724	2,91	12,28	15147	4,38	244	85	0.0786761	1	0.055,0.531	0.566,0.574	-0.277
65271	ENSG00000101868	POLA1	chrX	+	24721367	24721464	24717541	24717666	24722505	24722586	65271	7,80	0,10	2131	0,2	159	74	0.0787825	1	1.0,0.788	1.0,0.968	-0.09
57337	ENSG00000106070	GRB10	chr7	-	50823583	50823753	50799968	50800065	50860920	50861159	57337	5,71	0,6	2,93	0,0	241	85	0.0790462	1	1.0,0.807	1.0,1.0	-0.097
1534	ENSG00000064933	PMS1	chr2	+	190717380	190717503	190708689	190708806	190718664	190718808	1534	22125	3,8	17132	0,1	194	85	0.0792521	1	0.763,0.873	1.0,0.983	-0.174
72555	ENSG00000125386	FAM193A	chr4	+	2691232	2691431	2673847	2674099	2692424	2692697	72555	22285	0,22	30263	0,5	270	85	0.0793005	1	1.0,0.803	1.0,0.943	-0.07
12525	ENSG00000204209	DAXX	chr6	-	33288512	33289344	33288156	33288368	33290638	33290750	12525	3024245	12128	2074530	2,77	903	85	0.0794239	1	0.703,0.757	0.907,0.847	-0.147
67667	ENSG00000172456	FGGY	chr1	+	59787207	59787422	59762466	59762579	59844420	59844509	67667	2,88	0,10	2121	0,3	283	82	0.0794889	1	1.0,0.718	1.0,0.921	-0.102
71559	ENSG00000117523	PRRC2C	chr1	+	171556786	171556890	171556141	171556360	171557517	171557644	71559	54684	1,46	48853	0,7	175	85	0.0795137	1	0.963,0.878	1.0,0.983	-0.071
66095	ENSG00000006625	GGCT	chr7	-	30537356	30537512	30536592	30536851	30540151	30540297	66095	4,25	0,0	1,17	0,3	227	85	0.0795702	1	1.0,1.0	1.0,0.68	0.16
58432	ENSG00000110060	PUS3	chr11	-	125765118	125765684	125763380	125764181	125773064	125773116	58432	31425	0,9	23323	0,0	597	45	0.0796252	1	1.0,0.781	1.0,1.0	-0.109
60772	ENSG00000134851	TMEM165	chr4	+	56277780	56278006	56262123	56262563	56290704	56290810	60772	7201	0,21	10222	0,8	297	85	0.0796429	1	1.0,0.733	1.0,0.888	-0.077
61755	ENSG00000100181	none_found	chr22	+	17128494	17128675	17119468	17119630	17129416	17129538	61755	9,23	0,0	2,28	0,5	252	85	0.0796728	1	1.0,1.0	1.0,0.654	0.173
29089	ENSG00000225648	none_found	chr7	+	72301271	72301393	72300234	72300362	72302181	72302378	29089	5103	7,98	10,92	1,59	193	85	0.0797389	1	0.239,0.316	0.815,0.407	-0.334
23793	ENSG00000116679	IVNS1ABP	chr1	-	185275616	185275757	185274667	185274775	185276145	185276271	23793	6135	36395	5170	11299	212	85	0.0797917	1	0.063,0.121	0.154,0.186	-0.078
10066	ENSG00000131876	SNRPA1	chr15	-	101833229	101833377	101827112	101827215	101835301	101835409	10066	831430	1,85	471437	7110	219	85	0.0798008	1	0.97,0.867	0.723,0.835	0.14
1840	ENSG00000124571	XPO5	chr6	-	43526237	43526328	43523572	43523701	43527914	43528040	1840	31167	2,13	27153	0,2	168	85	0.0798876	1	0.887,0.867	1.0,0.975	-0.111
37796	ENSG00000217128	FNIP1	chr5	-	131046270	131046354	131044893	131044965	131052257	131052349	37796	4,38	0,33	4,37	0,12	134	65	0.0800036	1	1.0,0.358	1.0,0.599	-0.12
25657	ENSG00000075292	ZNF638	chr2	+	71655676	71655781	71653589	71654544	71658456	71658558	25657	22407	0,3	9487	2,25	176	85	0.080297	1	1.0,0.985	0.685,0.904	0.198
12126	ENSG00000058272	PPP1R12A	chr12	-	80199945	80200113	80192273	80192364	80201005	80201110	12126	38197	1,14	15245	0,2	238	84	0.0803175	1	0.931,0.832	1.0,0.977	-0.107
38258	ENSG00000187790	FANCM	chr14	+	45609834	45609912	45606271	45606444	45618039	45618198	38258	2,21	1,25	3,21	1,9	142	85	0.0803384	1	0.545,0.335	0.642,0.583	-0.173
48380	ENSG00000205744	DENND1C	chr19	-	6479869	6479913	6479679	6479729	6481689	6481798	48380	3,1	0,2	2,9	0,0	37	43	0.0803443	1	1.0,0.368	1.0,1.0	-0.316
20614	ENSG00000117593	DARS2	chr1	+	173800672	173800768	173799797	173799899	173802513	173802637	20614	8120	0,7	19176	0,0	170	85	0.0804186	1	1.0,0.896	1.0,1.0	-0.052
51713	ENSG00000126261	UBA2	chr19	+	34945348	34945461	34945164	34945258	34949673	34949829	51713	114656	0,14	55504	9,16	184	85	0.0804385	1	1.0,0.956	0.738,0.936	0.141
67809	ENSG00000150787	PTS	chr11	+	112101348	112101405	112097089	112097249	112103885	112103956	67809	4,52	0,0	4,34	0,5	79	64	0.0805869	1	1.0,1.0	1.0,0.846	0.077
57907	ENSG00000087470	DNM1L	chr12	+	32860300	32860347	32854348	32854496	32871576	32871652	57907	4,97	0,14	7,81	0,1	64	69	0.0807217	1	1.0,0.882	1.0,0.989	-0.053
50949	ENSG00000114867	EIF4G1	chr3	+	184033276	184033333	184032289	184032462	184038417	184038510	50949	3333	0,39	6567	0,15	100	85	0.0808724	1	1.0,0.879	1.0,0.97	-0.045
17697	ENSG00000143195	ILDR2	chr1	-	166905827	166905974	166896303	166896417	166925969	166926089	17697	1,16	0,42	7,42	3,39	218	85	0.0809394	1	1.0,0.129	0.476,0.296	0.179
56304	ENSG00000109332	UBE2D3	chr4	-	103723717	103723795	103720563	103720657	103747641	103747793	56304	1,13	0,0	0,7	1,2	142	85	0.0809707	1	1.0,1.0	0.0,0.677	0.662
22813	ENSG00000131697	NPHP4	chr1	-	6038329	6038473	6029146	6029319	6052303	6052531	22813	16,92	0,10	8104	0,1	215	85	0.08108	1	1.0,0.784	1.0,0.976	-0.096
14490	ENSG00000234127	TRIM26	chr6	-	30172432	30172542	30166442	30167041	30181081	30181196	14490	12,82	0,12	6167	0,2	181	85	0.0810832	1	1.0,0.762	1.0,0.975	-0.107
3566	ENSG00000225855	RUSC1-AS1	chr1	-	155292033	155292228	155291415	155291486	155293868	155293959	3566	3,4	0,2	2,61	0,3	244	63	0.0811076	1	1.0,0.341	1.0,0.84	-0.249
29793	ENSG00000124074	C16orf48	chr16	-	67698898	67699071	67697839	67697965	67699973	67700168	29793	27110	2,18	11327	0,22	244	85	0.0813353	1	0.825,0.68	1.0,0.838	-0.167
4723	ENSG00000110318	KIAA1377	chr11	+	101826522	101827674	101818761	101818873	101828898	101829097	4723	21114	2,7	20182	3,1	1223	85	0.0813398	1	0.422,0.531	0.317,0.927	-0.145
38352	ENSG00000072518	MARK2	chr11	+	63675731	63675776	63672257	63672515	63676348	63676956	38352	6151	1,29	7162	1,8	76	85	0.0813604	1	0.87,0.853	0.887,0.958	-0.061
34594	ENSG00000058673	ZC3H11A	chr1	+	203765420	203765624	203764833	203764922	203770702	203770756	34594	351143	3128	741244	8,68	234	44	0.0813774	1	0.687,0.627	0.635,0.775	-0.048
62369	ENSG00000105793	GTPBP10	chr7	+	89984399	89984544	89983771	89983863	90001468	90001542	62369	1,44	0,5	12,37	1,0	198	67	0.0814074	1	1.0,0.749	0.802,1.0	-0.026
630	ENSG00000133612	AGAP3	chr7	+	150835229	150835400	150831486	150831655	150838984	150839139	630	7143	4,81	6150	1,47	242	85	0.0814292	1	0.381,0.383	0.678,0.529	-0.222
34991	ENSG00000066855	MTFR1	chr8	+	66582107	66582253	66556973	66557019	66605878	66605994	34991	22216	1,20	16176	0,5	171	39	0.0814711	1	0.834,0.711	1.0,0.889	-0.172
53142	ENSG00000115355	CCDC88A	chr2	-	55539569	55539715	55536297	55536390	55543063	55543250	53142	55238	1,18	34216	0,2	217	85	0.0815664	1	0.956,0.838	1.0,0.977	-0.091
58928	ENSG00000152520	PAN3	chr13	+	28862120	28862259	28855451	28855516	28866518	28866676	58928	42213	0,2	26153	1,8	183	58	0.0816076	1	1.0,0.971	0.892,0.858	0.111
30065	ENSG00000121064	SCPEP1	chr17	+	55075745	55075859	55074322	55074416	55078215	55078353	30065	10204	0,2	5143	0,10	185	85	0.0816573	1	1.0,0.979	1.0,0.868	0.056
11084	ENSG00000122643	NT5C3	chr7	-	33075545	33075600	33066428	33066527	33102179	33102408	11084	16217	7194	5266	2136	96	85	0.0816725	1	0.669,0.498	0.689,0.634	-0.078
49471	ENSG00000196151	WDSUB1	chr2	-	160136271	160136456	160112706	160112886	160143093	160143180	49471	3,27	0,7	8,18	0,0	251	80	0.0817979	1	1.0,0.551	1.0,1.0	-0.224
38391	ENSG00000110171	TRIM3	chr11	-	6486794	6486962	6479294	6479526	6495020	6495214	38391	0,167	4,6	3201	0,1	239	85	0.0818792	1	0.0,0.908	1.0,0.986	-0.539
45951	ENSG00000110721	CHKA	chr11	-	67828959	67829297	67820981	67821514	67829419	67829501	45951	1,63	2,36	0,14	2,26	399	75	0.0818926	1	0.086,0.248	0.0,0.092	0.121
12892	ENSG00000119950	MXI1	chr10	+	112004585	112004631	111987946	111988079	112038937	112039052	12892	1,50	2,57	1,54	0,36	78	85	0.0821224	1	0.353,0.489	1.0,0.62	-0.389
18219	ENSG00000141905	NFIC	chr19	+	3456547	3456633	3453760	3453914	3462749	3463603	18219	7,33	0,0	8,24	0,5	158	85	0.0822067	1	1.0,1.0	1.0,0.721	0.139
49019	ENSG00000186470	BTN3A2	chr6	+	26368217	26368495	26365485	26365580	26368792	26368993	49019	24252	0,13	17254	0,0	349	85	0.0822179	1	1.0,0.825	1.0,1.0	-0.088
62970	ENSG00000188690	UROS	chr10	-	127486633	127486714	127484671	127484757	127495981	127496056	62970	26156	1,10	36176	0,1	125	62	0.0824197	1	0.928,0.886	1.0,0.989	-0.087
62248	ENSG00000120158	RCL1	chr9	+	4833153	4833228	4826857	4827033	4834140	4834265	62248	7,36	0,6	3,45	0,0	136	85	0.0824504	1	1.0,0.789	1.0,1.0	-0.105
18650	ENSG00000135164	DMTF1	chr7	+	86783543	86783594	86781768	86781871	86783705	86783844	18650	0,4	5,20	2,8	0,28	88	85	0.0825944	1	0.0,0.162	1.0,0.216	-0.527
38184	ENSG00000256500	APOPT1	chr14	+	104040443	104040507	104029298	104029461	104056517	104056721	38184	5,9	0,6	1,13	0,0	114	85	0.0826596	1	1.0,0.528	1.0,1.0	-0.236
46617	ENSG00000213186	TRIM59	chr3	-	160166513	160166583	160153290	160156974	160167504	160167553	46617	3,22	2,63	3,25	2,27	83	42	0.0827371	1	0.432,0.15	0.432,0.319	-0.085
59093	ENSG00000102763	KIAA0564	chr13	-	42524071	42524149	42486173	42486304	42534988	42535256	59093	0,101	1,11	4,62	0,1	142	85	0.0827506	1	0.0,0.846	1.0,0.974	-0.564
65814	ENSG00000112877	CEP72	chr5	+	624585	624694	620183	620376	633883	634062	65814	22254	3,56	14362	1,40	180	85	0.0827683	1	0.776,0.682	0.869,0.81	-0.11
37430	ENSG00000174939	ASPHD1	chr16	+	29917108	29917280	29916172	29916286	29930851	29930953	37430	8,41	0,3	7111	0,0	243	85	0.0827775	1	1.0,0.827	1.0,1.0	-0.087
34496	ENSG00000131089	ARHGEF9	chrX	-	62951885	62952190	62944411	62944591	62974194	62974556	34496	4,59	3,32	1,29	3,37	376	85	0.0827933	1	0.232,0.294	0.07,0.151	0.153
70718	ENSG00000129534	MIS18BP1	chr14	-	45705016	45705147	45696865	45697017	45722237	45722605	70718	1,36	0,6	4,25	0,0	202	85	0.0827966	1	1.0,0.716	1.0,1.0	-0.142
15172	ENSG00000111344	RASAL1	chr12	-	113554877	113554966	113553738	113553856	113556932	113557248	15172	2,29	0,0	2,42	0,8	164	85	0.0828211	1	1.0,1.0	1.0,0.731	0.135
27564	ENSG00000088256	GNA11	chr19	+	3110146	3110331	3094407	3094785	3113327	3113482	27564	9437	0,6	0,565	5,8	256	85	0.0828247	1	1.0,0.96	0.0,0.959	0.5
56663	ENSG00000144199	FAHD2B	chr2	-	97757599	97757725	97757198	97757449	97760437	97760576	56663	11190	1,59	0,243	2128	197	85	0.0828991	1	0.826,0.582	0.0,0.45	0.479
11621	ENSG00000006607	FARP2	chr2	+	242312498	242312705	242295703	242295803	242343242	242343347	11621	5122	0,11	4168	0,3	278	85	0.0829493	1	1.0,0.772	1.0,0.945	-0.086
52572	ENSG00000198919	DZIP3	chr3	+	108405291	108405431	108403062	108403188	108406822	108406943	52572	8145	0,10	6204	0,1	211	85	0.0829947	1	1.0,0.854	1.0,0.988	-0.067
1107	ENSG00000121022	COPS5	chr8	-	67960002	67960094	67958046	67958195	67963464	67963576	1107	0,10	63318	1,29	38164	170	85	0.0830025	1	0.0,0.015	0.013,0.081	-0.04
67817	ENSG00000077721	UBE2A	chrX	+	118715469	118715559	118709337	118709363	118716550	118716639	67817	17320	0,20	26337	1,0	97	16	0.0830215	1	1.0,0.725	0.811,1.0	-0.043
30645	ENSG00000100077	ADRBK2	chr22	+	26040558	26040632	25960815	25961120	26057542	26057644	30645	14,41	0,5	8,26	0,11	134	85	0.083075	1	1.0,0.839	1.0,0.6	0.119
30764	ENSG00000182010	RTKN2	chr10	-	63974787	63974850	63964615	63964781	63976876	63977008	30764	2,7	14,23	0,1	15,21	112	85	0.0831173	1	0.098,0.188	0.0,0.035	0.126
46636	ENSG00000160200	CBS	chr21	-	44487887	44488070	44486352	44486487	44488618	44488725	46636	2,60	16288	1171	5378	254	85	0.0831207	1	0.04,0.065	0.063,0.131	-0.045
14790	ENSG00000166411	IDH3A	chr15	+	78454575	78454709	78441721	78441772	78458491	78458542	14790	4108	1,9	6101	0,0	123	3	0.0832837	1	0.089,0.226	1.0,1.0	-0.843
46626	ENSG00000103253	HAGHL	chr16	+	779008	779088	778793	778895	779287	779715	46626	79448	1,5	43708	2,49	146	85	0.0833272	1	0.979,0.981	0.926,0.894	0.07
10069	ENSG00000131876	SNRPA1	chr15	-	101827860	101827907	101827125	101827215	101835301	101835418	10069	38410	1,85	28390	7110	78	83	0.0833938	1	0.976,0.837	0.81,0.79	0.106
37741	ENSG00000144711	IQSEC1	chr3	-	12944272	12944322	12942851	12943022	12949848	12950025	37741	1,27	3,37	1,30	3,86	86	85	0.0835869	1	0.248,0.419	0.248,0.256	0.082
65600	ENSG00000155366	RHOC	chr1	-	113247721	113247790	113246265	113246428	113249699	113249736	65600	58552	19129	4444	6145	69	30	0.0837249	1	0.57,0.65	0.225,0.571	0.212
42592	ENSG00000163738	MTHFD2L	chr4	+	75147141	75147267	75091018	75091111	75167413	75168352	42592	7,47	0,4	4118	0,0	197	85	0.0839629	1	1.0,0.835	1.0,1.0	-0.083
42631	ENSG00000158882	TOMM40L	chr1	+	161197425	161197527	161196677	161196745	161197673	161197779	42631	13,69	0,8	6157	0,0	149	61	0.0839697	1	1.0,0.779	1.0,1.0	-0.111
41150	ENSG00000086848	ALG9	chr11	-	111675817	111676039	111657007	111657244	111680366	111680433	41150	0,9	28219	5,21	14163	268	60	0.0842257	1	0.0,0.009	0.074,0.028	-0.047
26520	ENSG00000156162	DPY19L4	chr8	+	95768263	95768387	95751877	95752018	95773927	95774062	26520	4,65	0,19	3,66	0,6	195	85	0.0842328	1	1.0,0.599	1.0,0.827	-0.114
68054	ENSG00000137547	MRPL15	chr8	+	55055222	55055346	55049827	55049993	55059941	55060461	68054	19162	2,9	22133	1,0	195	85	0.0843832	1	0.805,0.887	0.906,1.0	-0.107
16608	ENSG00000175455	CCDC14	chr3	-	123674689	123674812	123667742	123667979	123675586	123675642	16608	15153	2,31	12126	1,10	158	49	0.0844248	1	0.699,0.605	0.788,0.796	-0.14
46865	ENSG00000214022	REPIN1	chr7	+	150067848	150067973	150066759	150066957	150068319	150068721	46865	10419	1,30	7336	3,51	196	85	0.0844274	1	0.813,0.858	0.503,0.741	0.213
43326	ENSG00000138386	NAB1	chr2	+	191514571	191514708	191513958	191514086	191520702	191520879	43326	1,64	0,1	1,28	0,4	208	85	0.0844911	1	1.0,0.963	1.0,0.741	0.111
52879	ENSG00000134198	TSPAN2	chr1	-	115615525	115615628	115601503	115601602	115631984	115632085	52879	2,97	0,3	1,86	0,11	174	85	0.0845802	1	1.0,0.94	1.0,0.792	0.074
41806	ENSG00000171103	TRMT61B	chr2	-	29083983	29084174	29075273	29075365	29092444	29093161	41806	5,62	0,9	6,90	0,3	262	85	0.0846386	1	1.0,0.691	1.0,0.907	-0.108
36305	ENSG00000108021	FAM208B	chr10	+	5754785	5754881	5726827	5727138	5762506	5762574	36305	2,17	0,2	2,13	0,10	146	61	0.0846898	1	1.0,0.78	1.0,0.352	0.214
53	ENSG00000135749	PCNXL2	chr1	-	233248590	233248712	233231500	233231609	233270758	233270936	53	3,11	2,9	4,19	1,4	193	85	0.0848302	1	0.398,0.35	0.638,0.677	-0.284
61306	ENSG00000156298	TSPAN7	chrX	+	38422208	38422392	38420794	38420880	38425574	38425608	61306	0,57	3,8	1,11	2,12	191	21	0.084884	1	0.0,0.439	0.052,0.092	0.148
49237	ENSG00000127152	BCL11B	chr14	-	99723807	99724176	99635623	99642532	99737497	99737565	49237	2582345	2,77	3163452	2,30	416	61	0.0849499	1	0.95,0.817	0.959,0.944	-0.068
21591	ENSG00000135655	USP15	chr12	+	62743001	62743088	62719652	62719714	62749111	62749256	21591	3,34	0,26	6,46	0,15	130	55	0.0849887	1	1.0,0.356	1.0,0.565	-0.105
26524	ENSG00000138658	C4orf21	chr4	-	113510879	113511030	113508435	113509085	113524679	113524853	26524	7,55	0,0	4,32	0,3	222	85	0.0850181	1	1.0,1.0	1.0,0.803	0.099
42233	ENSG00000198887	SMC5	chr9	+	72961520	72961565	72959059	72959185	72961981	72962077	42233	6,80	5,19	6,81	0,9	76	85	0.0851822	1	0.573,0.825	1.0,0.91	-0.256
45953	ENSG00000151876	FBXO4	chr5	+	41927114	41927350	41925355	41925600	41929798	41930019	45953	10,55	1,21	17,91	0,16	307	85	0.0852064	1	0.735,0.42	1.0,0.612	-0.229
55415	ENSG00000147443	DOK2	chr8	-	21769739	21770021	21769411	21769499	21771049	21771201	55415	46446	0,19	12405	1,36	349	81	0.085247	1	1.0,0.845	0.736,0.723	0.193
30287	ENSG00000164742	ADCY1	chr7	+	45662230	45662342	45649977	45650096	45688268	45688396	30287	15121	0,14	10204	0,2	183	85	0.0853631	1	1.0,0.801	1.0,0.979	-0.089
59867	ENSG00000115993	TRAK2	chr2	-	202285139	202285429	202272125	202272320	202316072	202316223	59867	2,83	0,4	13109	0,0	361	85	0.0853897	1	1.0,0.83	1.0,1.0	-0.085
70601	ENSG00000105835	NAMPT	chr7	-	105915391	105915495	105912310	105913104	105925273	105925333	70601	31250	2,11	31138	0,0	143	53	0.0854121	1	0.852,0.894	1.0,1.0	-0.127
72452	ENSG00000169193	CCDC126	chr7	+	23643704	23643898	23637585	23637670	23650789	23651172	72452	0,31	1,4	0,6	1,5	258	78	0.0854369	1	0.0,0.701	0.0,0.266	0.217
59896	ENSG00000166526	ZNF3	chr7	-	99674925	99675056	99672852	99673253	99679257	99679362	59896	7,76	6,63	11,97	0,55	202	85	0.0854714	1	0.329,0.337	1.0,0.426	-0.38
45134	ENSG00000116584	ARHGEF2	chr1	-	155935421	155935551	155935093	155935203	155936206	155936270	45134	23402	0,35	26368	0,10	173	57	0.0855694	1	1.0,0.791	1.0,0.924	-0.067
12988	ENSG00000165806	CASP7	chr10	+	115451755	115451829	115439427	115439737	115457252	115457362	12988	0,18	8150	0,43	3149	134	85	0.0857186	1	0.0,0.071	0.0,0.155	-0.042
41876	ENSG00000170921	TANC2	chr17	+	61495667	61495768	61492888	61493035	61497359	61505067	41876	6,61	0,11	7114	0,6	172	85	0.0857363	1	1.0,0.733	1.0,0.904	-0.085
57552	ENSG00000126777	KTN1	chr14	+	56139889	56139973	56139646	56139730	56142552	56142636	57552	6,64	37396	8119	38325	138	69	0.085767	1	0.075,0.075	0.095,0.155	-0.05
65118	ENSG00000040487	PQLC2	chr1	+	19639222	19639383	19638819	19638852	19644093	19644335	65118	2105	0,8	1188	0,3	173	26	0.085984	1	1.0,0.664	1.0,0.904	-0.12
16926	ENSG00000124641	MED20	chr6	-	41877082	41877260	41874541	41875025	41884522	41884677	16926	18444	1,68	7637	0,46	249	85	0.0860171	1	0.86,0.69	1.0,0.825	-0.138
23614	ENSG00000164941	INTS8	chr8	+	95880919	95881041	95879503	95879565	95884111	95884230	23614	0,1	6,50	0,8	1,38	163	55	0.0862376	1	0.0,0.007	0.0,0.066	-0.03
62837	ENSG00000149636	DSN1	chr20	-	35399827	35399876	35399275	35399380	35402064	35402221	62837	0,62	3,5	2,96	0,1	84	85	0.0862755	1	0.0,0.926	1.0,0.99	-0.532
22581	ENSG00000126767	ELK1	chrX	-	47509319	47509425	47500630	47500874	47509821	47509990	22581	15311	13351	15204	12414	177	85	0.0863765	1	0.357,0.298	0.375,0.191	0.044
24859	ENSG00000119397	CNTRL	chr9	+	123933685	123933826	123931888	123932094	123935520	123935787	24859	33582	11,98	12500	4,39	212	85	0.0863961	1	0.546,0.704	0.546,0.837	-0.067
71102	ENSG00000134744	ZCCHC11	chr1	-	52947475	52947595	52947094	52947307	52954580	52954707	71102	35117	0,0	34,93	0,8	191	85	0.0863983	1	1.0,1.0	1.0,0.838	0.081
26953	ENSG00000131374	TBC1D5	chr3	-	17603510	17603634	17549965	17550097	17627844	17628049	26953	1,5	0,3	4,28	2,2	195	85	0.0864163	1	1.0,0.421	0.466,0.859	0.048
20260	ENSG00000138613	APH1B	chr15	+	63579622	63579745	63578756	63578827	63594543	63594671	20260	9,67	0,8	12,69	0,1	173	64	0.0864448	1	1.0,0.756	1.0,0.962	-0.103
12750	ENSG00000125812	GZF1	chr20	+	23347639	23347734	23344999	23346384	23349398	23349566	12750	15,54	0,14	11,87	0,6	170	85	0.0864477	1	1.0,0.659	1.0,0.879	-0.11
55796	ENSG00000164828	SUN1	chr7	+	888054	888252	882977	883157	889559	889670	55796	12129	0,9	9100	0,0	269	85	0.0864487	1	1.0,0.819	1.0,1.0	-0.091
59028	ENSG00000143498	TAF1A	chr1	-	222753100	222753232	222750786	222750985	222757469	222757639	59028	3,21	7,15	5,17	0,8	203	85	0.0864657	1	0.152,0.37	1.0,0.471	-0.475
49824	ENSG00000115762	PLEKHB2	chr2	+	131890474	131890588	131884256	131884359	131897739	131897848	49824	1,25	0,24	1,29	2,6	185	85	0.0864925	1	1.0,0.324	0.187,0.69	0.224
3886	ENSG00000108395	TRIM37	chr17	-	57078958	57079075	57075568	57076820	57089688	57089807	3886	21242	4,21	15291	3,3	188	85	0.0865544	1	0.704,0.839	0.693,0.978	-0.064
43872	ENSG00000110074	FOXRED1	chr11	+	126141613	126141750	126139086	126139186	126142863	126142974	43872	3,14	0,13	1,6	0,19	208	85	0.0865844	1	1.0,0.306	1.0,0.114	0.096
247	ENSG00000114988	LMAN2L	chr2	-	97402873	97402954	97400145	97400263	97405590	97405778	247	0,11	1,27	4,7	0,7	148	85	0.08668	1	0.0,0.19	1.0,0.365	-0.588
34524	ENSG00000152359	POC5	chr5	-	75003561	75003700	75001528	75001612	75013130	75013273	34524	4,57	0,10	6,55	0,2	202	77	0.0867336	1	1.0,0.685	1.0,0.913	-0.114
37265	ENSG00000185480	PARPBP	chr12	+	102589089	102589225	102559506	102559661	102589728	102590370	37265	5,34	3,10	3,43	0,4	207	85	0.0868105	1	0.406,0.583	1.0,0.815	-0.413
7045	ENSG00000089057	SLC23A2	chr20	-	4951438	4951565	4913100	4913362	4982051	4982145	7045	5200	3,35	4244	0,19	198	85	0.0869314	1	0.417,0.71	1.0,0.846	-0.36
22315	ENSG00000135930	EIF4E2	chr2	+	233422593	233422728	233421125	233421240	233428956	233429061	22315	40675	4,79	211011	0,60	206	85	0.0869888	1	0.805,0.779	1.0,0.874	-0.145
58425	ENSG00000064102	ASUN	chr12	-	27075548	27075633	27070576	27070666	27077287	27077364	58425	23174	1,11	26185	0,1	139	68	0.0870893	1	0.918,0.886	1.0,0.989	-0.092
15307	ENSG00000106066	CPVL	chr7	-	29105638	29105737	29070192	29070375	29111388	29111520	15307	11,70	1,9	6,90	0,2	170	85	0.0872607	1	0.846,0.795	1.0,0.957	-0.158
50130	ENSG00000198911	SREBF2	chr22	+	42274662	42274762	42273232	42273425	42276719	42276996	50130	1121	0,11	2233	0,5	171	85	0.0873015	1	1.0,0.845	1.0,0.959	-0.057
42653	ENSG00000119844	AFTPH	chr2	+	64806619	64806680	64800079	64800202	64812555	64812679	42653	6120	0,3	4,99	1,12	108	85	0.0875908	1	1.0,0.969	0.759,0.867	0.172
3556	ENSG00000101639	CEP192	chr18	+	13071037	13071211	13069736	13069855	13072753	13072844	3556	25130	0,7	2124	0,0	244	84	0.0876518	1	1.0,0.865	1.0,1.0	-0.068
65982	ENSG00000066933	MYO9A	chr15	-	72185305	72185518	72180344	72180457	72186019	72186119	65982	2,47	3,19	1,46	1,6	284	85	0.0878043	1	0.166,0.425	0.23,0.696	-0.167
7107	ENSG00000105865	DUS4L	chr7	+	107205032	107205121	107204402	107204654	107207494	107207631	7107	5101	1,13	7125	0,5	164	85	0.0878293	1	0.722,0.801	1.0,0.928	-0.202
11847	ENSG00000121749	TBC1D15	chr12	+	72301642	72301769	72300801	72300918	72307605	72307706	11847	3,36	12,88	0,14	21,62	198	85	0.087902	1	0.097,0.149	0.0,0.088	0.079
26934	ENSG00000131374	TBC1D5	chr3	-	17627844	17628049	17550040	17550097	17665340	17665405	26934	0,5	5,32	3,13	1,18	214	23	0.0880486	1	0.0,0.017	0.244,0.072	-0.15
53977	ENSG00000115020	PIKFYVE	chr2	+	209169569	209169737	209168894	209169042	209176959	209177019	53977	22222	4,13	25208	0,4	207	53	0.0881117	1	0.585,0.814	1.0,0.93	-0.266
49750	ENSG00000081026	MAGI3	chr1	+	114224833	114224924	114223819	114223958	114225518	114228545	49750	2,9	2,18	2,10	1,5	168	85	0.0881263	1	0.336,0.202	0.503,0.503	-0.234
9740	ENSG00000128596	CCDC136	chr7	+	128457811	128457918	128455667	128455985	128461852	128462182	9740	3,20	3,29	0,20	2,65	178	85	0.0881819	1	0.323,0.248	0.0,0.128	0.221
48125	ENSG00000171988	JMJD1C	chr10	-	64979637	64979743	64976966	64977091	65024410	65024524	48125	12,39	1,8	2,35	4,9	177	85	0.0882529	1	0.852,0.701	0.194,0.651	0.354
27226	ENSG00000100281	HMGXB4	chr22	+	35658315	35658414	35653479	35653550	35659070	35659219	27226	27196	15159	9228	5,99	149	64	0.0884633	1	0.436,0.346	0.436,0.497	-0.076
40402	ENSG00000141127	PRPSAP2	chr17	+	18762652	18762788	18761483	18761574	18768781	18768877	40402	3,14	2,37	0,24	1,19	206	84	0.0886244	1	0.38,0.134	0.0,0.34	0.087
65009	ENSG00000159593	NAE1	chr16	-	66858757	66858788	66857431	66857503	66860425	66860486	65009	1,5	2,4	3,11	0,5	4	34	0.0887933	1	0.81,0.914	1.0,0.949	-0.112
52731	ENSG00000138942	RNF185	chr22	+	31597483	31597601	31556178	31556289	31600474	31600952	52731	5,86	0,10	5,75	0,1	189	85	0.0888095	1	1.0,0.795	1.0,0.971	-0.088
45045	ENSG00000151779	NBAS	chr2	-	15319111	15319240	15307037	15307447	15326865	15327004	45045	50422	0,7	17295	3,8	200	85	0.0889316	1	1.0,0.962	0.707,0.94	0.158
17008	ENSG00000135597	REPS1	chr6	-	139264649	139264713	139262471	139262626	139264989	139265063	17008	13,24	3,2	11,45	0,0	96	67	0.0889367	1	0.752,0.893	1.0,1.0	-0.178
71161	ENSG00000130714	POMT1	chr9	+	134381500	134381607	134378304	134378460	134381789	134381840	71161	3,65	0,4	8,80	0,0	137	44	0.0889791	1	1.0,0.839	1.0,1.0	-0.081
31728	ENSG00000165568	AKR1E2	chr10	+	4883976	4884032	4881975	4882018	4884612	4884696	31728	1,1	1,6	4,7	4,3	41	28	0.0891221	1	0.406,0.102	0.406,0.614	-0.256
61097	ENSG00000114120	SLC25A36	chr3	+	140685775	140685878	140681968	140682069	140689768	140689835	61097	1,7	11,47	2,17	7,36	149	60	0.0895799	1	0.035,0.057	0.103,0.16	-0.086
45121	ENSG00000100591	AHSA1	chr14	+	77934425	77934527	77925958	77926149	77935419	77935813	45121	5,45	0,10	3,26	0,0	173	85	0.0895845	1	1.0,0.689	1.0,1.0	-0.155
21594	ENSG00000135655	USP15	chr12	+	62719652	62719714	62715244	62715390	62743001	62743088	21594	1,51	1,7	7,61	0,2	105	80	0.0895949	1	0.432,0.847	1.0,0.959	-0.34
15599	ENSG00000169288	MRPL1	chr4	+	78828099	78828364	78815292	78815404	78830419	78830466	15599	0,24	4,17	0,4	8,24	291	40	0.0896591	1	0.0,0.163	0.0,0.022	0.071
41256	ENSG00000050426	LETMD1	chr12	+	51449926	51450028	51442816	51442968	51450132	51450268	41256	30348	8133	15267	8155	173	85	0.0897903	1	0.648,0.562	0.48,0.458	0.136
70934	ENSG00000070501	POLB	chr8	+	42218812	42218883	42196122	42196203	42229080	42229270	70934	0,12	2,32	1,5	0,5	117	74	0.0898344	1	0.0,0.192	1.0,0.387	-0.598
5727	ENSG00000129566	TEP1	chr14	-	20849711	20849845	20849471	20849560	20850071	20850222	5727	2,76	3,46	1143	2,31	202	82	0.089872	1	0.213,0.401	0.169,0.652	-0.104
33926	ENSG00000015153	YAF2	chr12	-	42592937	42593037	42555472	42555567	42631400	42631526	33926	0,7	10114	1,16	0,105	171	85	0.0898731	1	0.0,0.03	1.0,0.07	-0.52
46359	ENSG00000048991	R3HDM1	chr2	+	136399105	136399360	136396465	136396692	136402948	136403097	46359	27193	22,98	17,99	15102	326	85	0.0899955	1	0.242,0.339	0.228,0.202	0.075
7641	ENSG00000180776	ZDHHC20	chr13	-	21956039	21956084	21955572	21955688	21957058	21957148	7641	15,54	27105	6,32	30,84	74	83	0.0899969	1	0.384,0.366	0.183,0.299	0.134
24879	ENSG00000119397	none_found	chr9	+	123842583	123842756	123837289	123837345	123850573	123850821	24879	14150	4,53	5,93	0,15	208	49	0.0900617	1	0.452,0.4	1.0,0.594	-0.371
12919	ENSG00000063854	HAGH	chr16	-	1869115	1869224	1867168	1867272	1869897	1870015	12919	991714	11250	612235	4170	180	85	0.090083	1	0.81,0.764	0.878,0.861	-0.082
31430	ENSG00000163608	C3orf17	chr3	-	112729489	112729551	112727017	112727277	112729891	112730152	31430	6,42	0,0	8,46	1,6	110	85	0.090172	1	1.0,1.0	0.861,0.856	0.141
18010	ENSG00000162910	MRPL55	chr1	-	228296137	228296722	228295935	228296019	228296961	228296991	18010	59498	2,18	28353	1,34	586	15	0.0903725	1	0.43,0.415	0.417,0.21	0.109
51937	ENSG00000181450	ZNF678	chr1	+	227834244	227834371	227751243	227751425	227842036	227843529	51937	3,60	0,16	2,47	0,0	198	85	0.0903995	1	1.0,0.617	1.0,1.0	-0.192
2712	ENSG00000153006	SREK1IP1	chr5	-	64050141	64050189	64036883	64037027	64064331	64064512	2712	29192	5,57	19262	3,22	82	85	0.0904048	1	0.857,0.777	0.868,0.925	-0.08
56345	ENSG00000078304	PPP2R5C	chr14	+	102384167	102384284	102378737	102378810	102391477	102394326	56345	3121	8130	4157	8,94	169	66	0.0905171	1	0.128,0.267	0.163,0.395	-0.082
21353	ENSG00000167272	POP5	chr12	-	121017576	121017726	121017316	121017400	121018917	121019139	21353	41529	2,37	531074	0,33	213	77	0.0905544	1	0.881,0.838	1.0,0.922	-0.102
36401	ENSG00000072756	TRNT1	chr3	+	3188113	3188247	3186267	3186394	3189133	3189387	36401	22,62	0,2	14,38	4,3	205	85	0.0905624	1	1.0,0.928	0.592,0.84	0.248
47925	ENSG00000148985	PGAP2	chr11	+	3844138	3844223	3832496	3832654	3845112	3845365	47925	0,33	4,66	3,63	2,71	156	85	0.0906112	1	0.0,0.214	0.45,0.326	-0.281
61384	ENSG00000136280	CCM2	chr7	+	45109424	45109560	45039783	45039962	45113058	45113170	61384	25277	0,21	23315	0,4	207	85	0.0906694	1	1.0,0.844	1.0,0.97	-0.063
19967	ENSG00000076053	RBM7	chr11	+	114276430	114276521	114271387	114271489	114278166	114281329	19967	15,64	0,6	32,62	0,0	168	85	0.0906946	1	1.0,0.844	1.0,1.0	-0.078
65980	ENSG00000066933	MYO9A	chr15	-	72244117	72244237	72231192	72231268	72252241	72252437	65980	16,37	0,0	4,20	0,2	175	69	0.0908493	1	1.0,1.0	1.0,0.798	0.101
27317	ENSG00000164808	KIAA0146	chr8	+	48320422	48320523	48206455	48206619	48352884	48353104	27317	15107	2,9	6,70	0,0	172	85	0.0910017	1	0.788,0.855	1.0,1.0	-0.179
56988	ENSG00000184831	APOO	chrX	-	23898961	23899069	23897031	23897151	23925810	23926057	56988	12157	3,17	5192	1,5	179	85	0.0910228	1	0.655,0.814	0.704,0.948	-0.092
24711	ENSG00000179134	SAMD4B	chr19	+	39842456	39843014	39833107	39833216	39844645	39844706	24711	8,53	1,45	28210	3,72	598	54	0.0911179	1	0.419,0.096	0.457,0.208	-0.075
9475	ENSG00000050748	MAPK9	chr5	-	179706795	179707035	179696279	179696409	179707439	179707608	9475	14140	22215	15170	16143	311	85	0.0911895	1	0.148,0.151	0.204,0.245	-0.075
28958	ENSG00000184047	DIABLO	chr12	-	122702812	122702944	122701305	122701416	122710511	122711200	28958	15231	0,12	38246	0,1	203	85	0.0912471	1	1.0,0.89	1.0,0.99	-0.05
4721	ENSG00000110318	KIAA1377	chr11	+	101832471	101834611	101828898	101829097	101849077	101849190	4721	23212	0,2	18133	0,8	2211	85	0.0913351	1	1.0,0.803	1.0,0.39	0.206
706	ENSG00000163755	HPS3	chr3	+	148877832	148878066	148876452	148876633	148879934	148880120	706	42212	2,9	28220	0,1	305	85	0.0914026	1	0.854,0.868	1.0,0.984	-0.131
1129	ENSG00000143119	CD53	chr1	+	111440430	111440514	111434966	111435155	111441745	111442550	1129	12239	9159	14266	8110	154	85	0.09146	1	0.424,0.453	0.491,0.572	-0.093
41825	ENSG00000140105	WARS	chr14	-	100835423	100835595	100828044	100828258	100842596	100842645	41825	5657	2,41	221230	2,33	200	42	0.0916288	1	0.344,0.771	0.698,0.887	-0.235
57414	ENSG00000239521	GATS	chr7	-	99810669	99810756	99798280	99800226	99820219	99820343	57414	1,55	0,18	1,85	1,8	160	85	0.0918664	1	1.0,0.619	0.347,0.85	0.211
61657	ENSG00000090565	RAB11FIP3	chr16	+	541133	541268	538850	539000	546823	546859	61657	4,52	8,28	2121	0,31	150	29	0.0918842	1	0.088,0.264	1.0,0.43	-0.539
69682	ENSG00000145833	DDX46	chr5	+	134125795	134125912	134124202	134124281	134126159	134126242	69682	2146	6,92	0,83	7,87	166	63	0.0919808	1	0.112,0.376	0.0,0.266	0.111
25913	ENSG00000081237	PTPRC	chr1	+	198665840	198666038	198661475	198661502	198671515	198671659	25913	16327	0,3	1891151	0,0	204	20	0.0919989	1	1.0,0.914	1.0,1.0	-0.043
23176	ENSG00000162735	PEX19	chr1	-	160253319	160253429	160252733	160252899	160254844	160254886	23176	45668	10,51	37749	0,40	131	35	0.0920647	1	0.546,0.778	1.0,0.833	-0.254
31822	ENSG00000123562	MORF4L2	chrX	-	102933426	102933579	102931906	102931979	102940098	102940188	31822	124884	4169	68629	0,72	203	64	0.0922286	1	0.907,0.623	1.0,0.734	-0.102
3364	ENSG00000069943	PIGB	chr15	+	55642896	55643110	55633935	55634000	55646995	55647176	3364	9,29	0,14	14,53	0,8	258	58	0.0922521	1	1.0,0.318	1.0,0.598	-0.14
23566	ENSG00000167987	VPS37C	chr11	-	60906208	60906307	60901507	60901679	60928552	60928608	23566	2,52	1,6	3,80	0,2	134	49	0.0923882	1	0.422,0.76	1.0,0.936	-0.377
72453	ENSG00000169193	CCDC126	chr7	+	23637585	23637670	23637034	23637224	23650789	23651172	72453	1,32	2,18	2,37	0,9	156	85	0.0924104	1	0.214,0.492	1.0,0.691	-0.492
46163	ENSG00000159147	DONSON	chr21	-	34959827	34959908	34951655	34951868	34960626	34961014	46163	1,33	0,12	4,27	0,3	148	85	0.0925437	1	1.0,0.612	1.0,0.838	-0.113
6331	ENSG00000186654	PRR5,PRR5-ARHGAP8	chr22	+	45128130	45128271	45127609	45127701	45132651	45133542	6331	7,51	0,4	7,89	0,0	212	85	0.0926096	1	1.0,0.836	1.0,1.0	-0.082
18130	ENSG00000160087	UBE2J2	chr1	-	1203241	1203372	1192587	1192690	1209045	1209244	18130	8343	1,23	4614	0,9	202	85	0.0928331	1	0.771,0.863	1.0,0.966	-0.166
37254	ENSG00000185480	PARPBP	chr12	+	102569260	102569444	102559506	102559661	102589728	102590370	37254	8,47	3,10	15,43	0,4	255	85	0.0928728	1	0.471,0.61	1.0,0.782	-0.351
70325	ENSG00000173575	CHD2	chr15	+	93444396	93444529	93443057	93444054	93467550	93467782	70325	39308	4,48	32302	1,24	204	85	0.0931521	1	0.802,0.728	0.93,0.84	-0.12
42354	ENSG00000197381	ADARB1	chr21	+	46554629	46554747	46548316	46548488	46591524	46591599	42354	2,19	1,22	3,41	2,16	172	68	0.0931705	1	0.442,0.255	0.372,0.503	-0.089
18501	ENSG00000006634	DBF4	chr7	+	87507367	87507448	87505848	87506093	87514293	87514473	18501	5301	0,33	6205	0,6	148	85	0.0932276	1	1.0,0.84	1.0,0.952	-0.056
9361	ENSG00000168061	SAC3D1	chr11	+	64808757	64809338	64808372	64808578	64811696	64812271	9361	1541643	0,8	431960	0,38	652	85	0.093289	1	1.0,0.964	1.0,0.871	0.046
41704	ENSG00000110958	PTGES3	chr12	-	57059987	57060050	57058559	57058584	57065532	57065631	41704	11100	1,12	10,55	0,1	56	18	0.0933134	1	0.78,0.728	1.0,0.946	-0.219
55149	ENSG00000090661	CERS4	chr19	+	8322762	8322869	8321832	8321961	8326571	8326728	55149	13229	0,4	7202	0,16	178	85	0.0933375	1	1.0,0.965	1.0,0.858	0.053
50560	ENSG00000101442	ACTR5	chr20	+	37378652	37378882	37377084	37377496	37380773	37380943	50560	6167	0,8	1202	0,0	301	85	0.0934341	1	1.0,0.855	1.0,1.0	-0.073
41242	ENSG00000050426	LETMD1	chr12	+	51449932	51450028	51442816	51442968	51450132	51450285	41242	28341	8133	14263	8155	170	85	0.0934342	1	0.636,0.562	0.467,0.459	0.136
21905	ENSG00000151849	CENPJ	chr13	-	25459413	25459524	25458460	25458601	25466780	25467005	21905	4115	1,9	3110	0,1	182	85	0.0935122	1	0.651,0.856	1.0,0.981	-0.237
24806	ENSG00000166025	AMOTL1	chr11	+	94528176	94528326	94474103	94474154	94532555	94532705	24806	13,99	0,6	4132	0,0	180	44	0.0935697	1	1.0,0.801	1.0,1.0	-0.099
27108	ENSG00000006114	SYNRG	chr17	-	35937477	35937711	35936438	35936516	35944755	35944867	27108	14218	2,27	14183	1,9	291	71	0.093574	1	0.631,0.663	0.774,0.832	-0.156
43907	ENSG00000111364	DDX55	chr12	+	124090477	124090706	124086645	124086803	124092146	124092209	43907	5,75	0,11	4139	0,6	271	56	0.0935883	1	1.0,0.585	1.0,0.827	-0.121
72922	ENSG00000062598	ELMO2	chr20	-	45015976	45016070	45014762	45014914	45017677	45017859	72922	2,79	0,18	3,66	0,5	170	85	0.0935969	1	1.0,0.687	1.0,0.868	-0.09
43128	ENSG00000128641	MYO1B	chr2	+	192265474	192265561	192265107	192265194	192272840	192272915	43128	4,44	2,36	3126	0,55	138	63	0.0936323	1	0.477,0.358	1.0,0.511	-0.338
20257	ENSG00000136273	HUS1	chr7	-	48010856	48011113	48008415	48008915	48015209	48015284	20257	3,22	9,31	0,2	4,22	311	68	0.0936618	1	0.068,0.134	0.0,0.019	0.092
26629	ENSG00000196792	STRN3	chr14	-	31398406	31398517	31382729	31382863	31404368	31404510	26629	3,25	8,91	5,20	1,41	182	85	0.0937424	1	0.149,0.114	0.7,0.186	-0.311
40627	ENSG00000163689	C3orf67	chr3	-	58870270	58870435	58855887	58856035	58899433	58899590	40627	10,47	0,13	9,63	1,3	236	85	0.0938217	1	1.0,0.566	0.764,0.883	-0.041
12557	ENSG00000061273	HDAC7	chr12	-	48196006	48196057	48192567	48192755	48226828	48226915	12557	4,84	0,4	0,107	2,11	83	80	0.0940785	1	1.0,0.953	0.0,0.904	0.525
21387	ENSG00000135913	USP37	chr2	-	219399331	219399429	219394678	219394763	219410943	219411021	21387	19,86	1,12	30,94	3,2	149	64	0.0941543	1	0.891,0.755	0.811,0.953	-0.059
53003	ENSG00000130826	DKC1	chrX	+	153995271	153995336	153994490	153994675	153995530	153995657	53003	36665	0,15	8557	0,50	116	85	0.0941824	1	1.0,0.97	1.0,0.891	0.039
39116	ENSG00000175334	BANF1	chr11	+	65770314	65770541	65769726	65769984	65770705	65770806	39116	56563	5116	57528	8177	298	85	0.0942083	1	0.762,0.581	0.67,0.46	0.106
35739	ENSG00000128656	CHN1	chr2	-	175742567	175742856	175711641	175711685	175779785	175779899	35739	33241	1,5	39394	0,1	312	37	0.0944067	1	0.796,0.851	1.0,0.979	-0.166
36053	ENSG00000164414	SLC35A1	chr6	+	88210225	88210385	88187079	88187257	88210875	88211028	36053	13253	0,21	24241	0,6	231	85	0.0944358	1	1.0,0.816	1.0,0.937	-0.061
7529	ENSG00000130159	ECSIT	chr19	-	11629889	11630008	11624618	11625036	11639876	11639987	7529	40534	11,96	11634	1,63	190	85	0.0944424	1	0.619,0.713	0.831,0.818	-0.159
12589	ENSG00000121957	GPSM2	chr1	+	109428128	109428200	109419602	109419850	109439485	109439707	12589	10,56	0,8	14,40	0,0	130	85	0.0945248	1	1.0,0.821	1.0,1.0	-0.09
53804	ENSG00000145349	CAMK2D	chr4	-	114376881	114376977	114372187	114375671	114378490	114378719	53804	0,1	2,36	0,14	6,42	170	85	0.0946373	1	0.0,0.014	0.0,0.143	-0.064
28117	ENSG00000186687	LYRM7	chr5	+	130515787	130515860	130506502	130506731	130522720	130522802	28117	7,43	0,0	2,29	0,3	122	75	0.0946513	1	1.0,1.0	1.0,0.856	0.072
19984	ENSG00000134250	NOTCH2	chr1	-	120539619	120539955	120529582	120529705	120547951	120548211	19984	23329	0,0	15304	0,8	407	85	0.0947476	1	1.0,1.0	1.0,0.888	0.056
9464	ENSG00000075413	MARK3	chr14	+	103957288	103957444	103946723	103946827	103958113	103958371	9464	3,64	18259	0,35	29277	227	85	0.0947705	1	0.059,0.085	0.0,0.045	0.05
4810	ENSG00000163781	TOPBP1	chr3	-	133371306	133371458	133368777	133368787	133372188	133372368	4810	32234	0,6	44233	0,0	141	3	0.0949393	1	1.0,0.453	1.0,1.0	-0.273
627	ENSG00000133612	AGAP3	chr7	+	150837065	150837203	150831511	150831655	150838984	150839139	627	5115	4,81	2122	1,47	209	85	0.0949403	1	0.337,0.366	0.449,0.514	-0.13
69990	ENSG00000114757	PEX5L	chr3	-	179605460	179605572	179597716	179597911	179615929	179616034	69990	1,10	0,2	1,28	0,0	183	85	0.0949568	1	1.0,0.699	1.0,1.0	-0.151
34616	ENSG00000164944	KIAA1429	chr8	-	95527096	95527179	95524223	95524317	95530015	95530170	34616	15149	0,14	15173	0,2	152	85	0.0950152	1	1.0,0.856	1.0,0.98	-0.062
52711	ENSG00000177565	TBL1XR1	chr3	-	176797614	176797733	176771665	176771706	176816253	176816329	52711	2,41	0,21	9,88	1,17	123	18	0.0950283	1	1.0,0.222	0.568,0.431	0.112
8943	ENSG00000050438	SLC4A8	chr12	+	51856093	51856240	51854987	51855075	51857397	51857498	8943	0,20	1,5	6,25	0,2	214	81	0.0950363	1	0.0,0.602	1.0,0.826	-0.612
68129	ENSG00000134138	MEIS2	chr15	-	37186917	37187013	37183456	37184660	37187351	37187462	68129	0,30	1,13	1,60	0,11	170	85	0.0950527	1	0.0,0.536	1.0,0.732	-0.598
38946	ENSG00000074266	EED	chr11	+	85977124	85977258	85975213	85975305	85988021	85988054	38946	23160	1,8	5137	0,0	146	26	0.0951164	1	0.804,0.781	1.0,1.0	-0.208
12925	ENSG00000164638	SLC29A4	chr7	+	5327439	5327616	5322560	5322713	5330362	5330494	12925	27361	0,3	3320	0,16	248	85	0.0951235	1	1.0,0.976	1.0,0.873	0.051
52704	ENSG00000177565	TBL1XR1	chr3	-	176816253	176816329	176771560	176771706	176914908	176915261	52704	13166	0,40	14192	0,2	138	85	0.0951556	1	1.0,0.719	1.0,0.983	-0.132
36980	ENSG00000144589	STK11IP	chr2	+	220467189	220467297	220466709	220466805	220467426	220467498	36980	11187	0,2	6152	0,10	159	65	0.0952861	1	1.0,0.975	1.0,0.861	0.057
46829	ENSG00000110497	AMBRA1	chr11	-	46529740	46529920	46515673	46515754	46563494	46564531	46829	11263	1,19	15225	0,5	240	74	0.0953744	1	0.772,0.81	1.0,0.933	-0.176
39210	ENSG00000169359	SLC33A1	chr3	-	155551645	155551830	155547476	155547692	155571011	155571106	39210	6,50	0,7	2,91	0,2	256	85	0.0954207	1	1.0,0.703	1.0,0.938	-0.118
55116	ENSG00000118960	HS1BP3	chr2	-	20840732	20840940	20834475	20838412	20845099	20845265	55116	10157	1,8	9236	0,2	279	85	0.0954849	1	0.753,0.857	1.0,0.973	-0.182
17172	ENSG00000197275	RAD54B	chr8	-	95390795	95390862	95390407	95390608	95392372	95392634	17172	6,94	0,9	7,84	0,0	120	85	0.0955038	1	1.0,0.881	1.0,1.0	-0.06
46762	ENSG00000179912	none_found	chr12	-	57789531	57789601	57704046	57704246	57824502	57824788	46762	9,92	4,18	9102	0,9	126	85	0.0955437	1	0.603,0.775	1.0,0.884	-0.253
4673	ENSG00000105856	HBP1	chr7	+	106830617	106830762	106827013	106827126	106836278	106836596	4673	9110	0,10	3,76	0,0	216	85	0.095657	1	1.0,0.812	1.0,1.0	-0.094
20122	ENSG00000214135	none_found	chr3	-	197349057	197349201	197348574	197348739	197350090	197350253	20122	5182	1,52	7235	1,36	215	85	0.0958158	1	0.664,0.58	0.735,0.721	-0.106
72943	ENSG00000168487	BMP1	chr8	+	22056776	22056900	22054752	22054933	22058630	22058713	72943	0,0	2,24	0,4	2,10	186	76	0.0958419	1	0.0,0.0	0.0,0.14	-0.07
6974	ENSG00000224078	none_found	chr15	+	25334760	25335013	25332613	25332746	25336736	25336866	6974	21210	0,9	19564	0,3	324	85	0.0958701	1	1.0,0.86	1.0,0.98	-0.06
34108	ENSG00000168476	REEP4	chr8	-	21998119	21998210	21997718	21997761	21998963	21999464	34108	9201	0,11	9331	0,3	119	36	0.0960652	1	1.0,0.847	1.0,0.971	-0.062
39208	ENSG00000169359	SLC33A1	chr3	-	155551645	155551830	155551256	155551374	155571011	155571106	39208	8,83	0,6	3175	0,1	256	85	0.0961147	1	1.0,0.821	1.0,0.983	-0.081
11688	ENSG00000090857	PDPR	chr16	+	70165204	70165322	70162861	70163025	70166053	70166203	11688	8157	1,15	7181	0,5	189	85	0.0963776	1	0.783,0.825	1.0,0.942	-0.167
55367	ENSG00000005194	CIAPIN1	chr16	-	57465062	57465178	57464169	57464251	57466398	57466472	55367	17205	1,16	16410	0,11	159	57	0.0965604	1	0.859,0.821	1.0,0.93	-0.125
72752	ENSG00000113300	CNOT6	chr5	+	179922420	179922588	179921574	179921763	179956274	179956388	72752	0,39	9236	19,49	3209	239	85	0.0965654	1	0.0,0.056	0.693,0.077	-0.357
41803	ENSG00000009307	CSDE1	chr1	-	115280091	115280184	115279378	115279476	115280583	115280693	41803	29391	1971216	5222	159976	170	85	0.0965675	1	0.069,0.139	0.015,0.102	0.046
35079	ENSG00000087460	GNAS	chr20	+	57473995	57474040	57470666	57470739	57478585	57478640	35079	5321	331276	2556	151021	20	29	0.096637	1	0.18,0.267	0.162,0.441	-0.078
34554	ENSG00000185842	DNAH14	chr1	+	225211316	225211567	225195114	225195246	225226395	225226525	34554	1,2	2,0	5,8	0,0	322	85	0.0967213	1	0.117,1.0	1.0,1.0	-0.442
16028	ENSG00000175471	MCTP1	chr5	-	94417129	94417341	94353070	94353188	94417504	94417588	16028	3,62	0,0	2,25	0,2	275	77	0.096873	1	1.0,1.0	1.0,0.778	0.111
28820	ENSG00000197150	ABCB8	chr7	+	150731359	150731515	150725536	150725697	150731591	150731638	28820	6240	0,2	4240	0,11	182	40	0.0968747	1	1.0,0.963	1.0,0.827	0.068
15670	ENSG00000180773	SLC36A4	chr11	-	92917595	92917686	92915971	92916060	92918856	92918980	15670	17,74	1,15	7,77	0,4	165	82	0.0969505	1	0.894,0.71	1.0,0.905	-0.15
26578	ENSG00000062650	WAPAL	chr10	-	88256957	88257076	88233634	88233730	88259474	88260500	26578	50240	3,12	53206	0,2	190	85	0.0969902	1	0.882,0.899	1.0,0.979	-0.099
44400	ENSG00000130559	CAMSAP1	chr9	-	138754312	138754454	138742167	138742307	138758301	138758382	44400	10,56	0,8	8,61	0,1	202	74	0.0970189	1	1.0,0.719	1.0,0.957	-0.119
43862	ENSG00000156253	RWDD2B	chr21	-	30380081	30380444	30378079	30378972	30380715	30380942	43862	8,81	0,4	13158	0,1	434	85	0.0970747	1	1.0,0.799	1.0,0.969	-0.085
16014	ENSG00000188313	PLSCR1	chr3	-	146239330	146239840	146234792	146234954	146243391	146243434	16014	10,64	0,2	20137	0,0	532	36	0.0972484	1	1.0,0.684	1.0,1.0	-0.158
23079	ENSG00000136068	FLNB	chr3	+	58127584	58127623	58124008	58124256	58128376	58128479	23079	0,23	9513	0,119	10569	64	85	0.0973384	1	0.0,0.056	0.0,0.217	-0.081
62884	ENSG00000159322	ADPGK	chr15	-	73067212	73067438	73043709	73045233	73075799	73076126	62884	12321	0,13	14461	0,2	297	85	0.0975088	1	1.0,0.876	1.0,0.985	-0.054
5787	ENSG00000166762	CATSPER2	chr15	-	43931101	43931226	43928238	43928417	43932521	43932694	5787	1,16	0,2	1,46	0,0	196	85	0.0975297	1	1.0,0.776	1.0,1.0	-0.112
17012	ENSG00000162980	ARL5A	chr2	-	152666891	152667075	152663334	152663486	152668870	152668954	17012	3,20	17116	0,3	13102	247	77	0.0976779	1	0.052,0.051	0.0,0.009	0.047
19968	ENSG00000076053	RBM7	chr11	+	114276427	114276521	114271395	114271489	114278166	114279646	19968	15,63	0,6	32,57	0,0	170	85	0.0977474	1	1.0,0.84	1.0,1.0	-0.08
62134	ENSG00000138380	ALS2CR8	chr2	+	203806582	203806703	203782599	203782766	203817281	203817402	62134	1,40	2,24	3,57	2,16	192	85	0.0977871	1	0.181,0.425	0.399,0.612	-0.203
45326	ENSG00000142188	TMEM50B	chr21	-	34828310	34828404	34828033	34828091	34832719	34832812	45326	0,12	10,40	0,0	9,35	136	51	0.0978474	1	0.0,0.101	0.0,0.0	0.051
69317	ENSG00000214706	IFRD2	chr3	-	50326877	50327193	50326229	50326368	50327990	50328110	69317	11108	0,4	12195	0,0	387	85	0.0978632	1	1.0,0.856	1.0,1.0	-0.072
15643	ENSG00000116698	SMG7	chr1	+	183516237	183516387	183515100	183515472	183518342	183518423	15643	5125	15159	9,63	24175	210	74	0.0978677	1	0.105,0.217	0.117,0.113	0.046
69222	ENSG00000001631	KRIT1	chr7	-	91873315	91873463	91871347	91871451	91874740	91875109	69222	9,56	6,34	11,34	0,14	219	85	0.0979899	1	0.368,0.39	1.0,0.485	-0.363
18692	ENSG00000186166	CCDC84	chr11	+	118883941	118883972	118882858	118882964	118885703	118885793	18692	5,65	0,3	4,29	0,8	46	83	0.098008	1	1.0,0.975	1.0,0.867	0.054
40659	ENSG00000183763	TRAIP	chr3	-	49881973	49882013	49877716	49877806	49884957	49884993	40659	3,11	0,10	3,12	0,2	31	27	0.0980426	1	1.0,0.489	1.0,0.839	-0.175
4786	ENSG00000198721	ECI2	chr6	-	4119419	4119509	4117541	4117685	4125483	4125604	4786	99514	5,50	67549	2,15	166	85	0.0980916	1	0.91,0.84	0.945,0.949	-0.072
17919	ENSG00000015133	CCDC88C	chr14	-	91809942	91810001	91806227	91806368	91825985	91826055	17919	3,23	0,21	2,38	0,6	82	63	0.0981151	1	1.0,0.457	1.0,0.83	-0.187
24885	ENSG00000119397	CNTRL	chr9	+	123857165	123857296	123852552	123852683	123858699	123858841	24885	47170	3,24	8,82	5,15	202	85	0.0981502	1	0.868,0.749	0.402,0.697	0.259
11785	ENSG00000148153	C9orf80	chr9	-	115478740	115478821	115449446	115449913	115480266	115480516	11785	6,80	0,7	2149	0,0	148	85	0.0981648	1	1.0,0.868	1.0,1.0	-0.066
33289	ENSG00000119185	ITGB1BP1	chr2	-	9554306	9554385	9552488	9552534	9563501	9563651	33289	13133	1,73	14148	0,47	98	39	0.0981786	1	0.838,0.42	1.0,0.556	-0.149
23525	ENSG00000220804	none_found	chr2	+	243080914	243081039	243064437	243064606	243101494	243101644	23525	3,28	0,0	1,14	0,2	196	85	0.0981798	1	1.0,1.0	1.0,0.752	0.124
28510	ENSG00000058799	YIPF1	chr1	-	54354916	54355136	54354579	54354659	54355385	54355462	28510	14432	0,25	22692	1,12	264	58	0.0983096	1	1.0,0.792	0.829,0.927	0.018
61098	ENSG00000114120	SLC25A36	chr3	+	140685841	140685878	140681968	140682069	140689768	140689835	61098	1,2	11,47	1,7	7,36	35	60	0.0984432	1	0.135,0.068	0.197,0.25	-0.122
60175	ENSG00000168175	MAPK1IP1L	chr14	+	55528397	55528419	55518348	55518521	55529335	55530043	60175	13,86	0,29	8,99	2,52	30	85	0.0984541	1	1.0,0.894	0.919,0.844	0.066
32732	ENSG00000164109	MAD2L1	chr4	-	120986826	120986973	120982028	120982132	120987816	120988229	32732	702001	4,79	762172	0,28	218	85	0.0986317	1	0.872,0.908	1.0,0.968	-0.094
65456	ENSG00000174744	BRMS1	chr11	-	66105713	66105753	66104803	66105278	66106191	66106256	65456	6,45	0,2	3,20	0,5	39	58	0.0987638	1	1.0,0.971	1.0,0.856	0.058
20278	ENSG00000111554	MDM1	chr12	-	68710360	68710390	68709857	68710033	68715126	68715226	20278	2,14	1,1	0,8	1,3	46	85	0.0988072	1	0.787,0.963	0.0,0.831	0.46
59252	ENSG00000071462	WBSCR22	chr7	+	73098096	73098231	73097930	73098003	73100965	73101061	59252	13308	0,1	1399	2,6	187	66	0.098811	1	1.0,0.991	0.15,0.959	0.441
54205	ENSG00000101040	ZMYND8	chr20	-	45841286	45841370	45839405	45839542	45848908	45848975	54205	0,18	3,36	0,21	1,17	129	60	0.0988818	1	0.0,0.189	0.0,0.365	-0.088
35883	ENSG00000107036	KIAA1432	chr9	+	5754840	5754930	5747301	5747505	5756211	5756372	35883	9,52	1,9	2,34	0,0	166	85	0.0989091	1	0.822,0.747	1.0,1.0	-0.216
19014	ENSG00000169826	CSGALNACT2	chr10	+	43655941	43656043	43633933	43634015	43671398	43671480	19014	5,5	0,36	4,8	0,11	153	65	0.0989148	1	1.0,0.056	1.0,0.236	-0.09
73125	ENSG00000245910	none_found	chr8	-	67834848	67834960	67834558	67834627	67837671	67837831	73125	6706357	42464	3666435	10239	160	62	0.0990798	1	0.861,0.841	0.934,0.913	-0.073
34438	ENSG00000171310	CHST11	chr12	+	104995683	104995769	104850748	104851292	105150726	105151117	34438	691042	6187	281125	2,82	158	85	0.0990813	1	0.861,0.75	0.883,0.881	-0.077
60831	ENSG00000120029	C10orf76	chr10	-	103793039	103793096	103792782	103792929	103815841	103815950	60831	5,53	0,0	1,20	0,2	100	85	0.0991278	1	1.0,1.0	1.0,0.895	0.052
28705	ENSG00000166452	AKIP1	chr11	+	8933999	8934080	8932989	8933218	8936372	8936477	28705	5,64	7170	6108	1181	148	85	0.0992013	1	0.291,0.178	0.775,0.255	-0.281
15295	ENSG00000136856	SLC2A8	chr9	+	130159654	130159817	130159420	130159565	130162185	130162285	15295	1,43	4,50	0,38	5,91	234	85	0.0992116	1	0.083,0.238	0.0,0.132	0.095
3326	ENSG00000013725	CD6	chr11	+	60777043	60777346	60776005	60776317	60778541	60778607	3326	6141	0,6	6269	0,2	348	59	0.099244	1	1.0,0.799	1.0,0.958	-0.08
41107	ENSG00000153207	AHCTF1	chr1	-	247057960	247058050	247055080	247055221	247059136	247059227	41107	16,90	0,0	8,43	0,3	165	84	0.099262	1	1.0,1.0	1.0,0.879	0.061
52267	ENSG00000105341	ATP5SL	chr19	-	41939176	41939339	41937223	41938313	41939441	41939578	52267	31665	6150	23696	7245	234	85	0.0992825	1	0.652,0.617	0.544,0.508	0.109
8874	ENSG00000153140	CETN3	chr5	-	89692309	89692381	89689675	89689924	89695174	89695366	8874	1,18	33115	0,2	19173	130	85	0.0993075	1	0.019,0.093	0.0,0.008	0.052
2685	ENSG00000079819	EPB41L2	chr6	-	131188598	131188721	131184777	131184858	131206235	131206408	2685	4,41	0,8	12,52	0,3	183	74	0.0993952	1	1.0,0.675	1.0,0.875	-0.1
18021	ENSG00000117859	OSBPL9	chr1	+	52135105	52135184	52117662	52117713	52179674	52179751	18021	1,79	0,15	3,65	0,4	88	29	0.0995316	1	1.0,0.634	1.0,0.843	-0.105
30251	ENSG00000156170	none_found	chr8	+	95993086	95993201	95970222	95970407	96044222	96044326	30251	2,22	0,0	1,20	0,4	186	85	0.0995589	1	1.0,1.0	1.0,0.696	0.152
19404	ENSG00000101181	GTPBP5	chr20	+	60768471	60768680	60758097	60758113	60770857	60771005	19404	14262	0,0	5347	0,6	204	9	0.0996319	1	1.0,1.0	1.0,0.718	0.141
32508	ENSG00000189376	ZHX1-C8ORF76,C8orf76	chr8	-	124238739	124238872	124232434	124232537	124253469	124253526	32508	20,78	0,8	9,64	0,0	169	50	0.0997224	1	1.0,0.743	1.0,1.0	-0.129
34365	ENSG00000185753	CXorf38	chrX	-	40506258	40506393	40498260	40498380	40506556	40506773	34365	12329	0,11	12318	1,29	206	85	0.099739	1	1.0,0.925	0.832,0.819	0.137
61558	ENSG00000102384	CENPI	chrX	+	100354797	100355054	100353432	100353528	100356046	100356284	61558	6,79	2,46	3,37	3,44	328	85	0.0998033	1	0.437,0.308	0.206,0.179	0.18
69877	ENSG00000253426	none_found	chr8	+	9012475	9012659	9009301	9009426	9013661	9013814	69877	5,30	0,5	4,52	0,1	255	85	0.0998318	1	1.0,0.667	1.0,0.945	-0.139
61697	ENSG00000172493	AFF1	chr4	+	88053422	88053560	88052944	88053016	88055622	88055846	61697	13104	2,5	15102	0,0	189	65	0.099843	1	0.691,0.877	1.0,1.0	-0.216
33296	ENSG00000119185	ITGB1BP1	chr2	-	9558754	9558861	9554306	9554385	9563501	9563629	33296	15304	0,24	9266	2,42	165	72	0.099959	1	1.0,0.847	0.663,0.734	0.225
50935	ENSG00000114867	EIF4G1	chr3	+	184033550	184033644	184032339	184032462	184035108	184035285	50935	1119	6173	1185	3166	170	85	0.100111	1	0.077,0.256	0.143,0.358	-0.084
72079	ENSG00000123159	GIPC1	chr19	-	14603668	14603724	14593500	14593818	14606848	14606944	72079	3,20	0,1	1,42	0,12	98	85	0.100122	1	1.0,0.945	1.0,0.752	0.096
26612	ENSG00000114302	PRKAR2A	chr3	-	48820418	48820525	48810387	48810541	48831429	48831446	26612	2,51	0,3	11,63	0,0	103	10	0.100223	1	1.0,0.623	1.0,1.0	-0.189
54098	ENSG00000135945	REV1	chr2	-	100078957	100079084	100065797	100065966	100106278	100106497	54098	6105	0,31	9,79	0,10	198	85	0.100243	1	1.0,0.593	1.0,0.772	-0.09
50131	ENSG00000198911	SREBF2	chr22	+	42274662	42274762	42273945	42274127	42276719	42276996	50131	15235	911764	4422	271079	171	85	0.100296	1	0.076,0.062	0.069,0.163	-0.047
67568	ENSG00000197771	MCMBP	chr10	-	121595051	121595216	121591523	121591612	121596407	121596541	67568	56774	1,61	37745	0,20	233	82	0.100307	1	0.952,0.817	1.0,0.929	-0.08
70931	ENSG00000070501	POLB	chr8	+	42226788	42226853	42220129	42220216	42229080	42229326	70931	11,30	5,7	2,18	0,0	111	80	0.100386	1	0.613,0.755	1.0,1.0	-0.316
25370	ENSG00000093009	CDC45	chr22	+	19481996	19482125	19481849	19481905	19483503	19483552	25370	3118	2,41	3141	1,16	121	6	0.100484	1	0.069,0.125	0.129,0.304	-0.12
42736	ENSG00000166262	C15orf33	chr15	-	49881972	49882204	49880212	49880280	49907317	49907440	42736	1,4	0,2	6,10	0,0	279	61	0.100486	1	1.0,0.304	1.0,1.0	-0.348
548	ENSG00000158545	ZC3H18	chr16	+	88675341	88675459	88653007	88653092	88688604	88688796	548	1,28	0,4	2,31	0,0	182	78	0.100712	1	1.0,0.75	1.0,1.0	-0.125
34424	ENSG00000134516	DOCK2	chr5	+	169116255	169116337	169108747	169108883	169122806	169122942	34424	25198	0,0	5203	2,0	150	85	0.100769	1	1.0,1.0	0.586,1.0	0.207
55552	ENSG00000100239	PPP6R2	chr22	+	50857295	50857408	50854520	50854586	50857777	50857891	55552	18302	0,1	6274	0,12	158	59	0.100783	1	1.0,0.991	1.0,0.895	0.048
17705	ENSG00000119778	ATAD2B	chr2	-	24050667	24050730	24046127	24046439	24051718	24051809	17705	0,9	3,77	4,7	3,25	111	84	0.100793	1	0.0,0.081	0.502,0.175	-0.298
20757	ENSG00000164114	MAP9	chr4	-	156276867	156277036	156276222	156276312	156278600	156278671	20757	3,25	0,4	2,34	0,0	217	62	0.100811	1	1.0,0.641	1.0,1.0	-0.18
24155	ENSG00000154832	CXXC1	chr18	-	47811694	47811721	47811371	47811617	47812118	47812298	24155	18265	0,32	2343	1,82	40	85	0.100894	1	1.0,0.946	0.81,0.899	0.118
47990	ENSG00000075539	FRYL	chr4	-	48686689	48686812	48636307	48636507	48782094	48782288	47990	14,89	0,1	8,32	0,3	194	85	0.100918	1	1.0,0.975	1.0,0.824	0.076
38044	ENSG00000010165	METTL13	chr1	+	171759591	171759756	171756874	171757070	171761156	171761375	38044	25553	0,4	15595	0,28	236	85	0.100949	1	1.0,0.98	1.0,0.884	0.048
51394	ENSG00000129197	RPAIN	chr17	+	5329555	5329619	5329290	5329402	5335861	5336340	51394	23151	10,38	14203	2,29	114	85	0.101075	1	0.632,0.748	0.839,0.839	-0.149
4664	ENSG00000240742	SLC12A5	chr20	+	44651568	44651710	44650488	44650525	44652007	44652228	4664	1,4	4,19	1,26	2,22	158	30	0.101216	1	0.045,0.038	0.087,0.183	-0.094
48964	ENSG00000149532	CPSF7	chr11	-	61187393	61187566	61183971	61183991	61188861	61189080	48964	29292	0,12	10354	0,3	172	13	0.101217	1	1.0,0.648	1.0,0.899	-0.125
66768	ENSG00000231607	none_found	chr13	-	50619253	50619368	50617571	50618904	50623719	50623798	66768	5,37	9,18	5,19	30,16	173	72	0.101382	1	0.188,0.461	0.065,0.331	0.127
54421	ENSG00000066427	ATXN3	chr14	-	92560089	92560175	92555073	92555161	92563017	92563182	54421	1,7	1,4	3,9	0,1	154	81	0.101397	1	0.345,0.479	1.0,0.826	-0.501
6628	ENSG00000134759	ELP2	chr18	+	33747063	33747185	33739920	33739978	33751009	33751123	6628	7,48	0,0	4,32	0,3	159	51	0.101412	1	1.0,1.0	1.0,0.774	0.113
49724	ENSG00000126804	ZBTB1	chr14	+	64977966	64978102	64970702	64970809	64988204	64990616	49724	4,30	0,5	3,15	0,9	207	85	0.101582	1	1.0,0.711	1.0,0.406	0.152
9791	ENSG00000066557	LRRC40	chr1	-	70639304	70639392	70639147	70639193	70641492	70641665	9791	10,39	0,2	4,42	0,9	116	39	0.101613	1	1.0,0.868	1.0,0.611	0.128
60851	ENSG00000102543	CDADC1	chr13	+	49833481	49833659	49829974	49830049	49840014	49840046	60851	10,57	0,0	3,24	0,3	172	8	0.101794	1	1.0,1.0	1.0,0.271	0.365
22977	ENSG00000147894	C9orf72	chr9	-	27558488	27560297	27556558	27556794	27561582	27561647	22977	17480	0,0	7212	0,2	1853	58	0.101837	1	1.0,1.0	1.0,0.768	0.116
51893	ENSG00000113593	PPWD1	chr5	+	64867665	64868113	64865704	64865825	64872705	64872896	51893	68429	2,52	53568	1,34	519	85	0.101911	1	0.848,0.575	0.897,0.732	-0.103
25719	ENSG00000136643	RPS6KC1	chr1	+	213302869	213303232	213290658	213290752	213341200	213341316	25719	19,48	0,0	3,38	0,3	434	85	0.101943	1	1.0,1.0	1.0,0.713	0.143
22889	ENSG00000151917	BEND6	chr6	+	56846508	56846728	56820089	56820258	56857175	56857353	22889	7,56	0,0	3,53	0,4	291	85	0.102198	1	1.0,1.0	1.0,0.795	0.103
50409	ENSG00000151470	C4orf33	chr4	+	130030461	130030513	130023756	130023946	130030627	130030827	50409	5,24	0,0	1,19	0,3	90	85	0.102345	1	1.0,1.0	1.0,0.857	0.072
25977	ENSG00000147586	MRPS28	chr8	-	80940929	80941031	80915233	80915415	80942139	80942209	25977	0,1	1,9	0,8	2,5	151	63	0.102381	1	0.0,0.044	0.0,0.4	-0.178
63130	ENSG00000010626	LRRC23	chr12	+	7015008	7015118	7014748	7014923	7015572	7015826	63130	15129	4,72	0,139	8,85	181	85	0.102423	1	0.638,0.457	0.0,0.434	0.331
63939	ENSG00000138709	LARP1B	chr4	+	129035724	129035897	129028293	129028468	129042980	129043343	63939	15120	0,0	8,87	1,4	244	85	0.102548	1	1.0,1.0	0.736,0.883	0.191
23016	ENSG00000150627	WDR17	chr4	+	177036946	177037130	177032725	177032854	177041017	177041248	23016	3,24	0,4	4,29	0,0	255	85	0.102753	1	1.0,0.667	1.0,1.0	-0.166
7642	ENSG00000180776	ZDHHC20	chr13	-	21987790	21987911	21965860	21965993	22033192	22033414	7642	10,57	0,7	10,46	0,0	192	85	0.102936	1	1.0,0.783	1.0,1.0	-0.109
12355	ENSG00000143797	MBOAT2	chr2	-	9002400	9002452	9000824	9000894	9004299	9004364	12355	0,1	1,1	2,2	0,0	41	36	0.102954	1	0.0,0.468	1.0,1.0	-0.766
71713	ENSG00000040199	PHLPP2	chr16	-	71748414	71748704	71724421	71724612	71757671	71757715	71713	2,91	0,4	9,90	0,0	313	37	0.102976	1	1.0,0.729	1.0,1.0	-0.135
34052	ENSG00000065491	TBC1D22B	chr6	+	37284478	37284606	37281591	37281667	37284886	37284982	34052	14129	0,8	11128	0,0	183	69	0.102996	1	1.0,0.859	1.0,1.0	-0.071
72077	ENSG00000123159	GIPC1	chr19	-	14603668	14603724	14591404	14591590	14606848	14606944	72077	3,20	1,12	1,41	0,9	98	85	0.102998	1	0.722,0.591	1.0,0.798	-0.243
25713	ENSG00000136643	RPS6KC1	chr1	+	213290658	213290752	213277795	213277911	213302869	213303232	25713	8,24	0,2	2,12	0,4	170	85	0.103006	1	1.0,0.857	1.0,0.6	0.128
16727	ENSG00000244560	none_found	chr7	+	148985521	148986548	148984789	148984867	148987028	148987129	16727	311051	0,82	20843	0,118	1084	71	0.103018	1	1.0,0.456	1.0,0.319	0.069
56077	ENSG00000040341	STAU2	chr8	-	74621266	74621412	74585341	74585477	74650518	74650584	56077	1,11	0,3	3,16	0,0	191	59	0.103166	1	1.0,0.531	1.0,1.0	-0.234
68555	ENSG00000159708	LRRC36	chr16	+	67416035	67416150	67412491	67412615	67418772	67419103	68555	4,88	1,9	1118	0,2	186	85	0.103181	1	0.646,0.817	1.0,0.964	-0.25
46763	ENSG00000179912	R3HDM2	chr12	-	57682791	57682823	57677606	57677839	57689181	57689290	46763	1,95	5,33	4,90	0,23	50	85	0.103187	1	0.254,0.83	1.0,0.869	-0.392
53712	ENSG00000167635	ZNF146	chr19	+	36709023	36709097	36705503	36706098	36719649	36719721	53712	16220	3,80	10222	3128	114	65	0.103227	1	0.753,0.611	0.655,0.497	0.106
54465	ENSG00000099917	MED15	chr22	+	20905722	20905774	20891403	20891491	20918736	20918975	54465	8150	0,37	6166	0,11	86	81	0.103254	1	1.0,0.792	1.0,0.934	-0.071
5702	ENSG00000164989	C9orf93	chr9	+	15594038	15594170	15591363	15591554	15623264	15623411	5702	12,44	0,1	0,31	2,2	203	85	0.103257	1	1.0,0.949	0.0,0.866	0.541
57716	ENSG00000123179	EBPL	chr13	-	50237192	50237331	50234861	50235344	50265389	50265623	57716	35534	3421	29544	2269	210	85	0.103267	1	0.825,0.339	0.854,0.45	-0.07
60398	ENSG00000174938	SEZ6L2	chr16	-	29884025	29884064	29883729	29883847	29884560	29884752	60398	6,36	1,32	0,28	2,36	64	85	0.10336	1	0.889,0.599	0.0,0.508	0.49
33891	ENSG00000197386	HTT	chr4	+	3201458	3201666	3189377	3190820	3205733	3205875	33891	10476	0,19	17496	0,3	279	85	0.103387	1	1.0,0.884	1.0,0.981	-0.048
25805	ENSG00000068745	IP6K2	chr3	-	48752821	48752960	48732522	48732851	48754589	48754625	25805	3134	221120	3411	141170	154	29	0.103441	1	0.025,0.022	0.039,0.062	-0.027
12116	ENSG00000130985	UBA1	chrX	+	47057565	47057754	47053235	47053423	47058201	47058318	12116	5258	311780	13305	41774	260	85	0.103489	1	0.05,0.045	0.515,0.053	-0.237
3833	ENSG00000171735	CAMTA1	chr1	+	6880240	6880310	6845383	6845635	6885151	6885270	3833	61515	13,56	32489	6118	126	85	0.103595	1	0.76,0.861	0.783,0.737	0.05
40287	ENSG00000108433	GOSR2	chr17	+	45012394	45012535	45009432	45009565	45015964	45018733	40287	35226	1,18	32404	0,10	212	85	0.103627	1	0.933,0.834	1.0,0.942	-0.088
69299	ENSG00000093000	NUP50	chr22	+	45561745	45561997	45560546	45560609	45564048	45564127	69299	4,4	0,1	5,31	0,0	281	43	0.103711	1	1.0,0.38	1.0,1.0	-0.31
61895	ENSG00000128487	SPECC1	chr17	+	20107645	20109225	20059395	20059549	20130725	20130933	61895	87154	2,37	69186	0,19	1651	85	0.10376	1	0.691,0.176	1.0,0.335	-0.234
62829	ENSG00000149636	DSN1	chr20	-	35395171	35395244	35390863	35390951	35402064	35402200	62829	17,25	2,3	12,35	0,0	128	81	0.103822	1	0.843,0.841	1.0,1.0	-0.158
49312	ENSG00000151693	ASAP2	chr2	+	9484859	9484929	9484660	9484764	9490936	9491024	49312	17,94	0,4	4,36	0,5	122	81	0.103957	1	1.0,0.94	1.0,0.827	0.056
37699	ENSG00000015475	BID	chr22	-	18226568	18226779	18222114	18222254	18257146	18257258	37699	842130	23647	302089	6409	282	85	0.104019	1	0.524,0.498	0.601,0.606	-0.092
44957	ENSG00000137103	TMEM8B	chr9	+	35842388	35842714	35829773	35829952	35845971	35846268	44957	18328	0,4	8260	0,12	397	85	0.104056	1	1.0,0.946	1.0,0.823	0.062
64496	ENSG00000110321	EIF4G2	chr11	-	10828801	10828866	10828366	10828432	10830251	10830470	64496	31377	6,19	42390	0,14	90	59	0.104099	1	0.772,0.929	1.0,0.948	-0.123
11317	ENSG00000042088	TDP1	chr14	+	90422921	90423144	90422298	90422314	90429451	90430017	11317	11227	9174	7371	4108	218	9	0.104203	1	0.048,0.051	0.067,0.124	-0.046
68692	ENSG00000105939	ZC3HAV1	chr7	-	138763297	138763399	138758601	138758776	138768525	138768778	68692	1,13	0,0	0,13	2,3	173	85	0.104229	1	1.0,1.0	0.0,0.68	0.66
8509	ENSG00000151500	THYN1	chr11	-	134118702	134118853	134118172	134118378	134119060	134119156	8509	251915	17,65	177837	3,35	222	85	0.104237	1	0.85,0.844	0.958,0.902	-0.083
63028	ENSG00000108344	PSMD3	chr17	+	38151428	38151548	38146346	38146450	38152435	38152591	63028	6,88	1,12	8,90	0,4	191	85	0.104442	1	0.728,0.765	1.0,0.909	-0.208
73277	ENSG00000168411	RFWD3	chr16	-	74670243	74670475	74666420	74666571	74678259	74678351	73277	44682	1,56	45923	1,7	303	85	0.104503	1	0.925,0.774	0.927,0.974	-0.101
53054	ENSG00000100629	CEP128	chr14	-	81405728	81405884	81382795	81382906	81424521	81424629	53054	691625	0,168	27557	6,67	227	85	0.104558	1	1.0,0.784	0.628,0.757	0.2
15540	ENSG00000174501	none_found	chr2	-	96533187	96533329	96525608	96525822	96542186	96542257	15540	5,7	0,0	2,3	0,3	192	64	0.104771	1	1.0,1.0	1.0,0.25	0.375
45664	ENSG00000114107	CEP70	chr3	-	138290107	138290198	138256019	138256189	138310695	138310798	45664	15231	4,73	6142	0,25	168	85	0.104864	1	0.655,0.616	1.0,0.742	-0.236
12575	ENSG00000108509	CAMTA2	chr17	-	4885383	4885455	4884972	4885126	4886051	4886187	12575	16325	2,26	0,365	1,62	130	85	0.104867	1	0.84,0.891	0.0,0.794	0.468
6881	ENSG00000175497	DPP10	chr2	+	116520147	116520186	116510749	116510873	116525872	116525980	6881	4,43	0,0	1,15	0,2	64	85	0.104879	1	1.0,1.0	1.0,0.909	0.045
48214	ENSG00000163319	MRPS18C	chr4	+	84379498	84379582	84378061	84378111	84382125	84382185	48214	3,50	0,10	4,86	0,5	80	11	0.104901	1	1.0,0.407	1.0,0.703	-0.148
32309	ENSG00000127511	SIN3B	chr19	+	16973694	16973790	16973162	16973370	16974490	16974607	32309	3,72	0,48	1,58	5,59	170	85	0.105272	1	1.0,0.429	0.091,0.33	0.504
24647	ENSG00000104218	CSPP1	chr8	+	68015271	68015370	68007527	68007967	68018139	68018210	24647	4,36	1,3	6,47	0,0	149	64	0.105367	1	0.632,0.838	1.0,1.0	-0.265
22048	ENSG00000010818	HIVEP2	chr6	-	143158071	143158184	143104657	143104752	143266235	143266338	22048	8,24	0,0	4,11	0,2	184	85	0.105403	1	1.0,1.0	1.0,0.718	0.141
44509	ENSG00000134644	PUM1	chr1	-	31437520	31437757	31426560	31426828	31438828	31439125	44509	621250	1,51	871326	1,11	308	85	0.105526	1	0.945,0.871	0.96,0.971	-0.058
49956	ENSG00000114127	XRN1	chr3	-	142066075	142066184	142054289	142054351	142074242	142074338	49956	11224	0,11	3131	6,5	150	55	0.1056	1	1.0,0.882	0.155,0.906	0.411
9881	ENSG00000173276	ZNF295	chr21	-	43429575	43429706	43423005	43423070	43430360	43430466	9881	1,6	1,7	2,18	0,6	175	58	0.105668	1	0.249,0.221	1.0,0.499	-0.515
26388	ENSG00000169062	UPF3A	chr13	+	115051733	115051875	115048311	115048418	115051993	115052104	26388	18,94	4,2	5,71	4,6	213	85	0.105684	1	0.642,0.949	0.333,0.825	0.217
72316	ENSG00000149187	CELF1	chr11	-	47522412	47522484	47521004	47521156	47574543	47574669	72316	1,15	0,56	2,22	0,37	130	85	0.105841	1	1.0,0.149	1.0,0.28	-0.066
64065	ENSG00000140543	DET1	chr15	-	89073853	89074704	89070829	89071017	89074843	89074946	64065	14120	0,3	9271	0,0	922	85	0.105854	1	1.0,0.787	1.0,1.0	-0.107
8313	ENSG00000134014	ELP3	chr8	+	27970535	27970690	27967886	27967955	27987018	27987180	8313	8139	0,6	16218	1,0	203	62	0.105923	1	1.0,0.876	0.83,1.0	0.023
70052	ENSG00000163125	RPRD2	chr1	+	150414356	150414434	150413398	150413499	150415706	150415759	70052	6,31	3,30	14,30	4,13	103	46	0.105954	1	0.472,0.316	0.61,0.508	-0.165
11467	ENSG00000052126	PLEKHA5	chr12	+	19499927	19500116	19498775	19498822	19501332	19501453	11467	3,13	2,12	0,9	2,30	215	40	0.106036	1	0.218,0.168	0.0,0.053	0.167
16055	ENSG00000177738	none_found	chr5	-	43016463	43016579	43014835	43015252	43017175	43018913	16055	1,7	2,12	0,2	3,17	187	85	0.10609	1	0.185,0.21	0.0,0.051	0.172
56417	ENSG00000117640	FAM54B	chr1	+	26149730	26149930	26149509	26149619	26150134	26150239	56417	6,52	2351	0,30	8458	271	85	0.106268	1	0.485,0.044	0.0,0.02	0.255
15118	ENSG00000178222	RNF212	chr4	-	1090552	1090627	1052108	1052181	1107143	1107303	15118	3,72	0,6	4,72	0,0	117	66	0.106296	1	1.0,0.871	1.0,1.0	-0.065
5998	ENSG00000132388	UBE2G1	chr17	-	4186092	4186216	4172511	4175811	4269565	4269969	5998	43216	0,12	72257	0,0	195	85	0.106303	1	1.0,0.887	1.0,1.0	-0.056
62509	ENSG00000176463	SLCO3A1	chr15	+	92705985	92706228	92694179	92694244	92715009	92715665	62509	39699	0,2	19378	1,9	287	58	0.106331	1	1.0,0.986	0.793,0.895	0.149
25821	ENSG00000158321	AUTS2	chr7	+	70236534	70236630	70231099	70231320	70242088	70242118	25821	2,7	0,6	1,10	0,0	108	23	0.106397	1	1.0,0.199	1.0,1.0	-0.4
72864	ENSG00000129292	PHF20L1	chr8	+	133811328	133811418	133811017	133811106	133816063	133816277	72864	0,37	4112	2,44	2,73	163	82	0.106411	1	0.0,0.143	0.335,0.233	-0.213
5423	ENSG00000156313	RPGR	chrX	-	38163887	38164043	38160499	38160624	38169867	38170026	5423	12,80	1,6	12,82	1,0	227	85	0.106468	1	0.818,0.833	0.818,1.0	-0.084
12541	ENSG00000061273	HDAC7	chr12	-	48186320	48186452	48185653	48185787	48187151	48187325	12541	0,35	13129	3,69	2185	203	85	0.1065	1	0.0,0.102	0.386,0.135	-0.21
41113	ENSG00000153207	AHCTF1	chr1	-	247005995	247006078	247002399	247004300	247012916	247013151	41113	9184	0,17	4143	0,0	152	85	0.106566	1	1.0,0.858	1.0,1.0	-0.071
57612	ENSG00000163818	LZTFL1	chr3	-	45879418	45879539	45877081	45877276	45883480	45883608	57612	3,75	1,28	4,87	0,16	192	85	0.106613	1	0.57,0.543	1.0,0.707	-0.297
72914	ENSG00000062598	ELMO2	chr20	-	45015976	45016076	45014762	45014914	45017677	45017859	72914	4167	0,18	7153	0,5	171	85	0.106636	1	1.0,0.822	1.0,0.938	-0.058
21771	ENSG00000103423	DNAJA3	chr16	+	4504811	4504928	4500400	4500498	4505546	4506776	21771	13214	19403	5230	23630	188	85	0.106643	1	0.236,0.194	0.089,0.142	0.1
24248	ENSG00000126001	CEP250	chr20	+	34046124	34046195	34043021	34043337	34047802	34047925	24248	9,81	0,3	3,58	0,8	128	85	0.106686	1	1.0,0.947	1.0,0.828	0.06
48966	ENSG00000149532	CPSF7	chr11	-	61188525	61188599	61187941	61188045	61188861	61189080	48966	0,14	15356	4,29	5388	134	85	0.107035	1	0.0,0.024	0.337,0.045	-0.179
54611	ENSG00000188917	TRMT2B	chrX	-	100296305	100296360	100292905	100293040	100306772	100307105	54611	1,49	0,10	4,51	0,3	96	85	0.107077	1	1.0,0.813	1.0,0.938	-0.063
69269	ENSG00000065559	MAP2K4	chr17	+	11984672	11984847	11924134	11924318	11998891	11999011	69269	13108	0,10	14118	0,2	246	85	0.10728	1	1.0,0.789	1.0,0.953	-0.082
54224	ENSG00000144182	LIPT1	chr2	+	99772763	99772889	99771417	99771514	99778419	99778738	54224	1,22	1,12	0,30	1,4	197	85	0.107285	1	0.301,0.442	0.0,0.764	-0.011
29220	ENSG00000093217	XYLB	chr3	+	38409675	38409748	38408298	38408364	38414145	38414227	29220	3,22	0,4	2,31	0,0	96	49	0.10732	1	1.0,0.737	1.0,1.0	-0.131
66941	ENSG00000136270	TBRG4	chr7	-	45143697	45143855	45142931	45143042	45145039	45145363	66941	40568	1,36	45978	0,21	229	85	0.107818	1	0.937,0.854	1.0,0.945	-0.077
35411	ENSG00000232559	none_found	chr7	-	66049331	66049453	66041741	66041919	66057243	66057373	35411	1,12	2,97	0,2	3149	193	85	0.107923	1	0.18,0.052	0.0,0.006	0.113
11458	ENSG00000137574	TGS1	chr8	+	56708536	56708711	56702655	56702858	56711472	56711779	11458	25,68	0,9	12,56	0,0	246	85	0.107991	1	1.0,0.723	1.0,1.0	-0.139
1584	ENSG00000165959	CLMN	chr14	-	95681977	95682070	95679555	95679746	95688027	95688111	1584	8,56	0,21	8,48	0,6	162	77	0.108091	1	1.0,0.559	1.0,0.792	-0.116
60535	ENSG00000137513	NARS2	chr11	-	78204108	78204241	78189630	78189729	78239887	78239982	60535	22109	0,10	14107	0,0	204	85	0.108096	1	1.0,0.82	1.0,1.0	-0.09
34233	ENSG00000129187	DCTD	chr4	-	183837825	183838010	183837571	183837692	183838440	183838498	34233	12213	0,5	15251	1,18	222	51	0.10819	1	1.0,0.907	0.775,0.762	0.185
23131	ENSG00000176473	WDR25	chr14	+	100847246	100848083	100842769	100842841	100934357	100934505	23131	6,84	0,4	10202	0,2	888	65	0.10822	1	1.0,0.606	1.0,0.881	-0.138
36311	ENSG00000108021	FAM208B	chr10	+	5751492	5751626	5726904	5727138	5754356	5754502	36311	5,13	0,5	3,24	0,1	205	85	0.10825	1	1.0,0.519	1.0,0.909	-0.195
41892	ENSG00000115970	THADA	chr2	-	43787372	43787524	43783231	43783694	43793836	43793960	41892	8,37	0,0	2,21	0,2	223	85	0.108283	1	1.0,1.0	1.0,0.8	0.1
48962	ENSG00000149532	CPSF7	chr11	-	61188525	61188602	61187941	61188045	61188861	61189080	48962	0,19	15356	4,35	5388	140	85	0.108288	1	0.0,0.031	0.327,0.052	-0.174
60401	ENSG00000196154	S100A4	chr1	-	153517945	153517994	153517129	153517285	153518228	153518278	60401	0,1	1,1	0,1	2,12	42	43	0.108407	1	0.0,0.506	0.0,0.079	0.214
64255	ENSG00000137497	NUMA1	chr11	-	71780887	71780957	71746947	71747021	71791503	71791733	64255	10270	0,46	7326	0,18	108	67	0.108448	1	1.0,0.785	1.0,0.918	-0.067
22906	ENSG00000182473	EXOC7	chr17	-	74087223	74087316	74085255	74085401	74090494	74090662	22906	4,42	10210	5,83	4226	170	85	0.108483	1	0.167,0.091	0.385,0.155	-0.141
62150	ENSG00000108387	2015-09-04	chr17	-	56604042	56604339	56603580	56603674	56609321	56609411	62150	3,43	0,9	1,33	0,19	366	83	0.108715	1	1.0,0.52	1.0,0.283	0.119
2236	ENSG00000132716	DCAF8	chr1	-	160231074	160231148	160213749	160213824	160231906	160232241	2236	20314	2,91	12260	0,44	117	68	0.108751	1	0.853,0.667	1.0,0.774	-0.127
45541	ENSG00000140995	DEF8	chr16	+	90015824	90016046	90015182	90015222	90020650	90020784	45541	1,75	8,88	2151	2,91	241	33	0.108783	1	0.017,0.105	0.12,0.185	-0.092
50931	ENSG00000114867	EIF4G1	chr3	+	184037476	184037589	184032289	184032462	184038417	184038510	50931	35487	0,39	39800	0,15	184	85	0.108923	1	1.0,0.852	1.0,0.961	-0.054
20686	ENSG00000163913	IFT122	chr3	+	129180070	129180147	129170756	129170841	129182402	129182469	20686	3,37	5,90	6,31	2,41	108	53	0.108927	1	0.227,0.168	0.596,0.271	-0.236
66295	ENSG00000198182	ZNF607	chr19	-	38198814	38198910	38187263	38190796	38200596	38200723	66295	1,11	0,2	1,28	0,0	170	85	0.10893	1	1.0,0.733	1.0,1.0	-0.133
19769	ENSG00000180747	none_found	chr16	-	21498898	21498937	21495692	21495856	21531148	21531500	19769	2,28	3,51	4,21	0,26	64	85	0.10895	1	0.47,0.422	1.0,0.518	-0.313
22720	ENSG00000139793	MBNL2	chr13	+	98018712	98018807	98009735	98009889	98043575	98044262	22720	1,44	4,44	0,27	5,52	170	85	0.108961	1	0.111,0.333	0.0,0.206	0.119
33400	ENSG00000147050	KDM6A	chrX	+	44919853	44920009	44919301	44919401	44920568	44920664	33400	9,57	1,25	9117	2,13	227	85	0.10897	1	0.771,0.461	0.628,0.771	-0.084
12838	ENSG00000171634	BPTF	chr17	+	65871671	65871860	65870932	65871136	65882243	65882432	12838	35589	3,32	19522	4,55	260	85	0.109077	1	0.792,0.857	0.608,0.756	0.143
65657	ENSG00000172765	TMCC1	chr3	-	129576092	129576248	129567188	129567255	129612336	129612419	65657	2,23	0,5	5103	0,8	193	51	0.109091	1	1.0,0.549	1.0,0.773	-0.112
24833	ENSG00000166575	TMEM135	chr11	+	86802403	86802437	86782564	86782657	86868382	86868448	24833	4,11	0,2	1,4	0,3	28	59	0.109121	1	1.0,0.921	1.0,0.737	0.092
57610	ENSG00000163818	LZTFL1	chr3	-	45879418	45879543	45875729	45877276	45883480	45883637	57610	2190	1,28	8231	0,16	196	85	0.109154	1	0.464,0.746	1.0,0.862	-0.326
18978	ENSG00000122694	GLIPR2	chr9	+	36147782	36147891	36136741	36136788	36162358	36163899	18978	5146	0,24	5247	1,7	135	40	0.109194	1	1.0,0.643	0.597,0.913	0.067
25486	ENSG00000138041	SMEK2	chr2	-	55805382	55805478	55804450	55804492	55806814	55806917	25486	1,6	8,12	6,7	4,7	120	35	0.109202	1	0.035,0.127	0.304,0.226	-0.184
28982	ENSG00000152795	HNRPDL	chr4	-	83346715	83346820	83345781	83346036	83347189	83347282	28982	66965	111527	34904	41345	176	85	0.109235	1	0.223,0.469	0.286,0.559	-0.077
34829	ENSG00000010803	SCMH1	chr1	-	41625396	41625605	41618270	41618413	41626546	41626570	34829	6,39	0,4	9,53	0,0	212	17	0.10959	1	1.0,0.439	1.0,1.0	-0.281
57738	ENSG00000141452	C18orf8	chr18	+	21089156	21089243	21084334	21084411	21095819	21095960	57738	8121	0,22	7,79	0,2	145	70	0.10967	1	1.0,0.726	1.0,0.95	-0.112
66903	ENSG00000103494	RPGRIP1L	chr16	-	53679536	53679915	53675196	53675387	53682875	53683027	66903	8,60	0,2	13145	0,0	450	85	0.109837	1	1.0,0.85	1.0,1.0	-0.075
8121	ENSG00000114439	BBX	chr3	+	107508633	107508723	107497217	107497366	107510086	107510146	8121	7,46	2,33	5,48	0,17	134	53	0.109857	1	0.581,0.355	1.0,0.528	-0.296
34009	ENSG00000128923	FAM63B	chr15	+	59123972	59124115	59113915	59114018	59139495	59139669	34009	22122	0,9	26137	0,1	214	85	0.109904	1	1.0,0.843	1.0,0.982	-0.07
46464	ENSG00000114026	OGG1	chr3	+	9793453	9793633	9792029	9792107	9796387	9796569	46464	3104	2,4	12131	0,1	237	71	0.110008	1	0.31,0.886	1.0,0.975	-0.39
71384	ENSG00000149308	NPAT	chr11	-	108057208	108057296	108056129	108056221	108058824	108058906	71384	13,29	2,13	10,40	2,1	152	75	0.110079	1	0.762,0.524	0.712,0.952	-0.189
33796	ENSG00000135439	AGAP2	chr12	-	58129151	58129210	58128101	58128187	58135694	58135940	33796	3,68	0,40	2116	0,27	98	79	0.110096	1	1.0,0.578	1.0,0.776	-0.099
42565	ENSG00000168003	SLC3A2	chr11	+	62639048	62639141	62623639	62623853	62648490	62648919	42565	7336	2,77	9510	1,68	170	85	0.110331	1	0.636,0.686	0.818,0.789	-0.142
16921	ENSG00000124641	MED20	chr6	-	41877006	41877260	41873092	41875025	41884522	41884677	16921	29681	1,68	15944	0,46	325	85	0.110344	1	0.884,0.724	1.0,0.843	-0.117
53591	ENSG00000146476	C6orf211	chr6	+	151775682	151775788	151773421	151773721	151779462	151779707	53591	8190	1,22	12231	0,11	177	85	0.110389	1	0.793,0.806	1.0,0.91	-0.155
19952	ENSG00000113569	NUP155	chr5	-	37307398	37307534	37305158	37305312	37309230	37309369	19952	45235	0,43	54218	0,8	207	85	0.110416	1	1.0,0.692	1.0,0.918	-0.113
34452	ENSG00000186635	ARAP1	chr11	-	72443559	72443642	72437664	72438217	72463372	72463448	34452	6127	0,69	5192	0,47	136	69	0.11042	1	1.0,0.483	1.0,0.675	-0.096
8452	ENSG00000117868	ESYT2	chr7	-	158542339	158542414	158540884	158540971	158552176	158552272	8452	29330	0,33	19247	5,31	131	80	0.110602	1	1.0,0.859	0.699,0.83	0.165
35586	ENSG00000120802	TMPO	chr12	+	98938728	98938839	98931252	98931350	98940136	98940225	35586	91654	5207	50620	2112	179	82	0.110617	1	0.893,0.591	0.92,0.717	-0.077
8623	ENSG00000245958	none_found	chr4	+	120418965	120419058	120415640	120415678	120433505	120433619	8623	1,48	0,12	5,41	0,3	116	31	0.110711	1	1.0,0.517	1.0,0.785	-0.134
42910	ENSG00000115459	ELMOD3	chr2	+	85582677	85582721	85581842	85581952	85584089	85584375	42910	0,39	2,5	1,46	2,0	74	85	0.110719	1	0.0,0.9	0.365,1.0	-0.232
42998	ENSG00000204463	BAG6	chr6	-	31607276	31607423	31606804	31607003	31607975	31608083	42998	1851868	36235	691762	31268	218	85	0.111033	1	0.667,0.756	0.465,0.719	0.12
36626	ENSG00000122085	none_found	chr2	-	242033691	242033844	242029394	242029459	242036657	242036842	36626	5,72	0,0	3,64	0,4	197	58	0.111072	1	1.0,1.0	1.0,0.825	0.088
58637	ENSG00000121104	FAM117A	chr17	-	47809912	47810082	47799860	47799956	47841253	47841529	58637	10507	2,29	4475	0,7	241	85	0.111076	1	0.638,0.86	1.0,0.96	-0.231
40556	ENSG00000110713	NUP98	chr11	-	3707293	3707424	3704429	3704671	3712576	3712719	40556	27381	2,31	15386	0,11	202	85	0.11123	1	0.85,0.838	1.0,0.937	-0.125
8699	ENSG00000149657	LSM14B	chr20	+	60702640	60702757	60701359	60701495	60704840	60705008	8699	9,85	11137	4,70	8200	188	85	0.111236	1	0.27,0.219	0.184,0.137	0.084
50657	ENSG00000011451	WIZ	chr19	-	15538920	15539319	15537792	15538344	15540396	15540900	50657	11328	6,56	13645	1,63	470	85	0.111286	1	0.249,0.514	0.702,0.649	-0.294
59119	ENSG00000139620	KANSL2	chr12	-	49072818	49073021	49065581	49065745	49073437	49073616	59119	10297	0,17	7220	2,28	274	85	0.111331	1	1.0,0.844	0.521,0.709	0.307
10642	ENSG00000137411	VARS2	chr6	+	30891129	30891282	30890880	30891008	30892130	30892337	10642	49570	0,4	17573	0,25	224	85	0.111354	1	1.0,0.982	1.0,0.897	0.042
38646	ENSG00000125319	C17orf53	chr17	+	42232653	42232779	42225225	42226395	42239238	42239844	38646	10,54	1,8	4,52	0,1	197	85	0.111372	1	0.812,0.744	1.0,0.957	-0.2
42350	ENSG00000161547	SRSF2	chr17	-	74731853	74731957	74731142	74731240	74732235	74732527	42350	22567	341361	7353	291212	175	85	0.111403	1	0.239,0.168	0.105,0.124	0.089
44646	ENSG00000169621	APLF	chr2	+	68740211	68740359	68729862	68730035	68740679	68740816	44646	2,33	3,0	16,33	1,3	219	85	0.111416	1	0.206,1.0	0.861,0.81	-0.233
36691	ENSG00000106692	FKTN	chr9	+	108335935	108336027	108320430	108320446	108337225	108337418	36691	5,11	0,0	0,2	1,1	94	9	0.111421	1	1.0,1.0	0.0,0.161	0.92
67509	ENSG00000149743	TRPT1	chr11	-	63993257	63993341	63992970	63993052	63993521	63993681	67509	50629	8100	17668	7160	144	75	0.111534	1	0.765,0.766	0.558,0.685	0.144
34673	ENSG00000115486	GGCX	chr2	-	85781265	85781429	85780354	85780620	85782606	85782713	34673	4,83	0,4	15108	0,0	235	85	0.11156	1	1.0,0.882	1.0,1.0	-0.059
17343	ENSG00000119929	CUTC	chr10	+	101514285	101514391	101507013	101507147	101515381	101515465	17343	21162	3,10	11188	0,2	169	77	0.11167	1	0.761,0.881	1.0,0.977	-0.167
57579	ENSG00000185838	GNB1L	chr22	-	19808120	19808246	19799807	19799970	19808750	19808898	57579	23281	5,23	4287	0,7	197	85	0.111785	1	0.665,0.841	1.0,0.946	-0.22
32900	ENSG00000196586	MYO6	chr6	+	76604947	76604977	76602246	76602407	76617321	76617425	32900	0,1	4,52	0,6	1,39	46	85	0.111788	1	0.0,0.034	0.0,0.221	-0.094
21892	ENSG00000173436	MINOS1,C1orf151-NBL1	chr1	+	19927280	19927465	19923532	19923603	19949967	19950077	21892	5,34	6,45	0,52	10110	235	64	0.111835	1	0.185,0.171	0.0,0.114	0.121
54245	ENSG00000064012	CASP8	chr2	+	202139611	202139676	202137360	202137499	202149538	202150040	54245	3,35	0,18	1,48	0,6	116	85	0.111925	1	1.0,0.588	1.0,0.854	-0.133
57254	ENSG00000198146	ZNF770	chr15	-	35279757	35279874	35270541	35275691	35280316	35280488	57254	32448	0,13	38338	0,35	188	85	0.111982	1	1.0,0.94	1.0,0.814	0.063
1871	ENSG00000085382	HACE1	chr6	-	105291097	105291173	105244803	105244900	105297016	105297121	1871	3,55	2,6	6,33	0,0	138	85	0.112181	1	0.48,0.85	1.0,1.0	-0.335
466	ENSG00000213185	FAM24B	chr10	-	124609939	124610066	124608593	124608955	124615160	124615302	466	21311	4,38	12234	0,13	198	85	0.112195	1	0.693,0.778	1.0,0.885	-0.207
21391	ENSG00000135913	USP37	chr2	-	219321814	219321884	219320302	219320441	219324512	219324628	21391	6119	0,10	12,68	0,0	126	85	0.11226	1	1.0,0.889	1.0,1.0	-0.055
38719	ENSG00000187535	IFT140	chr16	-	1618217	1618335	1616161	1616292	1630759	1630851	38719	3,55	0,5	1,78	0,0	189	85	0.112287	1	1.0,0.832	1.0,1.0	-0.084
29852	ENSG00000135315	KIAA1009	chr6	-	84928820	84928932	84925493	84925640	84930774	84930889	29852	0,0	3,10	6,0	2,3	183	85	0.112329	1	0.0,0.0	0.582,0.0	-0.291
21619	ENSG00000149531	none_found	chr20	+	29625872	29625984	29623128	29623254	29628226	29628331	21619	23,79	15,56	18,69	3,33	183	85	0.112345	1	0.416,0.396	0.736,0.493	-0.209
8971	ENSG00000158161	EYA3	chr1	-	28354299	28354437	28339621	28339805	28362054	28362191	8971	9,58	0,4	13,78	0,0	209	85	0.112391	1	1.0,0.855	1.0,1.0	-0.073
67265	ENSG00000164930	FZD6	chr8	+	104340495	104340644	104336708	104337726	104341882	104342293	67265	16,55	1,9	6,97	0,4	220	85	0.112535	1	0.861,0.702	1.0,0.904	-0.17
21021	ENSG00000149548	CCDC15	chr11	+	124861356	124861479	124857022	124858030	124862475	124862583	21021	26,44	1,8	5,39	2,12	194	85	0.112573	1	0.919,0.707	0.523,0.587	0.258
39859	ENSG00000074603	DPP8	chr15	-	65748049	65748179	65746600	65746753	65748562	65748709	39859	2,37	4,37	0,11	5,23	201	85	0.112632	1	0.175,0.297	0.0,0.168	0.152
3071	ENSG00000157578	LCA5L	chr21	-	40800097	40800429	40794337	40795416	40801056	40801137	3071	2,6	0,4	4,10	0,0	392	74	0.112673	1	1.0,0.221	1.0,1.0	-0.389
72819	ENSG00000015479	MATR3	chr5	+	138651385	138651427	138645731	138650425	138651764	138651877	72819	20376	2,53	10335	4,80	70	85	0.112765	1	0.924,0.896	0.752,0.836	0.116
22237	ENSG00000111653	ING4	chr12	-	6764803	6765079	6762395	6762562	6772230	6772295	22237	2,8	2,35	1,20	0,24	320	58	0.112976	1	0.153,0.04	1.0,0.131	-0.469
67641	ENSG00000172113	NME6	chr3	-	48341766	48342213	48339916	48340013	48342759	48342809	67641	5,42	0,7	3,32	0,22	476	43	0.113062	1	1.0,0.351	1.0,0.116	0.117
71986	ENSG00000054965	FAM168A	chr11	-	73130918	73131044	73122438	73122581	73141734	73141815	71986	34366	3,39	25444	0,24	186	74	0.113167	1	0.818,0.789	1.0,0.88	-0.136
43691	ENSG00000205629	LCMT1	chr16	+	25172422	25172525	25151491	25151568	25175918	25176039	43691	30268	5,29	12275	0,13	159	70	0.113201	1	0.725,0.803	1.0,0.903	-0.188
68449	ENSG00000079156	OSBPL6	chr2	+	179209012	179209087	179204398	179204491	179213950	179214116	68449	0,15	1,2	1,9	3,7	136	85	0.113211	1	0.0,0.824	0.172,0.446	0.103
47070	ENSG00000198604	BAZ1A	chr14	-	35255331	35255427	35254982	35255207	35261980	35262127	47070	26114	7,24	21136	0,20	170	85	0.113237	1	0.65,0.704	1.0,0.773	-0.21
50780	ENSG00000064115	TM7SF3	chr12	-	27152458	27152609	27148293	27148341	27167010	27167306	50780	24489	3,66	34366	0,29	178	41	0.113283	1	0.648,0.631	1.0,0.744	-0.233
16880	ENSG00000011198	ABHD5	chr3	+	43756438	43756550	43753198	43753355	43759934	43760098	16880	8,70	0,6	10,63	0,0	183	85	0.113479	1	1.0,0.844	1.0,1.0	-0.078
14010	ENSG00000154582	TCEB1	chr8	-	74876721	74876860	74868145	74868289	74884311	74884487	14010	7199	10136	3208	5,82	210	85	0.113926	1	0.221,0.372	0.195,0.507	-0.054
37909	ENSG00000206562	METTL6	chr3	-	15457004	15457090	15455527	15455669	15457278	15457449	37909	5,32	4,10	1,32	4,20	158	85	0.113956	1	0.402,0.633	0.119,0.463	0.227
62575	ENSG00000135679	MDM2	chr12	+	69210591	69210725	69202991	69203072	69222550	69222711	62575	10,69	0,8	5,51	0,0	194	74	0.114044	1	1.0,0.767	1.0,1.0	-0.117
8164	ENSG00000103222	ABCC1	chr16	+	16103632	16103758	16101672	16101849	16126965	16127027	8164	27207	0,17	32133	0,2	167	55	0.114168	1	1.0,0.8	1.0,0.956	-0.078
37636	ENSG00000117448	AKR1A1	chr1	+	46018107	46018235	46016214	46016827	46032240	46032360	37636	19247	2,40	8392	0,32	199	85	0.114202	1	0.802,0.725	1.0,0.84	-0.156
18567	ENSG00000131373	HACL1	chr3	-	15626754	15626849	15624383	15624496	15631046	15631119	18567	7,40	0,7	2,50	0,1	151	66	0.114308	1	1.0,0.714	1.0,0.956	-0.121
69200	ENSG00000161267	BDH1	chr3	-	197281432	197281584	197260355	197260432	197282651	197282858	69200	1,32	0,14	1,66	0,11	208	70	0.114421	1	1.0,0.435	1.0,0.669	-0.117
72776	ENSG00000181896	ZNF101	chr19	+	19788672	19788799	19779604	19779775	19789989	19791138	72776	44447	4,46	14389	0,17	198	85	0.114436	1	0.825,0.807	1.0,0.908	-0.138
42134	ENSG00000107262	BAG1	chr9	-	33262102	33262244	33261084	33261167	33262699	33262828	42134	1,12	32184	4,20	10150	204	76	0.114624	1	0.012,0.024	0.13,0.047	-0.071
29630	ENSG00000153094	BCL2L11	chr2	+	111881626	111881716	111878490	111878765	111921709	111921808	29630	1,11	0,0	0,4	1,1	166	85	0.114632	1	1.0,1.0	0.0,0.672	0.664
18782	ENSG00000070669	ASNS	chr7	-	97499089	97499125	97498219	97498491	97501662	97501783	18782	9348	0,43	5415	2,98	58	85	0.114636	1	1.0,0.922	0.786,0.861	0.138
52725	ENSG00000172890	NADSYN1	chr11	+	71191264	71191320	71189440	71189515	71191800	71191925	52725	1,40	9139	1,52	5105	81	68	0.114754	1	0.085,0.195	0.144,0.294	-0.079
70624	ENSG00000176978	DPP7	chr9	-	140007812	140007948	140007657	140007739	140008316	140008480	70624	102968	1,14	431082	5,27	197	75	0.114854	1	0.975,0.963	0.766,0.938	0.117
54111	ENSG00000112210	RAB23	chr6	-	57072425	57072511	57061247	57061404	57075023	57075243	54111	18,58	0,1	4,39	0,4	158	85	0.114952	1	1.0,0.969	1.0,0.84	0.065
26123	ENSG00000092020	PPP2R3C	chr14	-	35579024	35579107	35577344	35577442	35579730	35579836	26123	4,12	0,4	4,16	0,0	152	85	0.115155	1	1.0,0.627	1.0,1.0	-0.187
2700	ENSG00000079819	EPB41L2	chr6	-	131199243	131199390	131190702	131191266	131206235	131206408	2700	1,31	8245	2,75	7251	218	85	0.115228	1	0.046,0.047	0.1,0.104	-0.056
69187	ENSG00000242247	ARFGAP3	chr22	-	43206818	43206950	43204772	43204896	43213147	43213270	69187	47290	0,22	23230	3,27	203	85	0.115268	1	1.0,0.847	0.762,0.781	0.152
27254	ENSG00000197603	C5orf42	chr5	-	37243114	37243221	37239814	37239971	37244476	37244709	27254	4,15	0,6	2,14	0,0	178	85	0.115288	1	1.0,0.544	1.0,1.0	-0.228
3240	ENSG00000137814	HAUS2	chr15	+	42851536	42851606	42841010	42841163	42855946	42856055	3240	3,23	2,11	2,15	0,2	126	85	0.115289	1	0.503,0.585	1.0,0.835	-0.373
33046	ENSG00000103479	RBL2	chr16	+	53480953	53481018	53476569	53476770	53485614	53485743	33046	9,45	0,8	6,54	0,1	116	85	0.11529	1	1.0,0.805	1.0,0.975	-0.085
72447	ENSG00000170113	NIPA1	chr15	-	23058914	23058985	23052594	23052755	23060814	23060905	72447	0,2	5121	2,10	6,87	127	84	0.115654	1	0.0,0.011	0.181,0.071	-0.121
47232	ENSG00000111879	FAM184A	chr6	-	119285831	119285936	119282925	119283128	119287999	119288117	47232	18114	0,0	5,76	0,4	176	85	0.115663	1	1.0,1.0	1.0,0.902	0.049
29075	ENSG00000143393	PI4KB	chr1	-	151298647	151298849	151280049	151280277	151299746	151300133	29075	24181	0,8	9358	0,0	273	85	0.115711	1	1.0,0.876	1.0,1.0	-0.062
15852	ENSG00000163013	FBXO41	chr2	-	73493020	73493094	73492409	73492768	73493584	73493810	15852	2,76	1,61	5116	1,57	134	85	0.115827	1	0.559,0.441	0.76,0.563	-0.161
34942	ENSG00000100429	HDAC10	chr22	-	50687259	50687288	50687090	50687180	50687756	50687883	34942	6132	4,5	0,141	1,29	42	83	0.116006	1	0.748,0.981	0.0,0.906	0.412
22424	ENSG00000070010	UFD1L	chr22	-	19462992	19463125	19459209	19459331	19466605	19466738	22424	412122	4179	192547	6353	204	85	0.116045	1	0.81,0.832	0.569,0.75	0.161
57548	ENSG00000126777	KTN1	chr14	+	56133958	56134048	56128239	56128330	56137446	56137527	57548	42307	0,10	32227	5,13	154	73	0.116126	1	1.0,0.936	0.752,0.892	0.146
61386	ENSG00000136280	CCM2	chr7	+	45109424	45109560	45077851	45078025	45113058	45113170	61386	25279	0,35	23314	0,8	207	85	0.116138	1	1.0,0.766	1.0,0.942	-0.088
72805	ENSG00000015479	MATR3	chr5	+	138642927	138644016	138629418	138629494	138651764	138651877	72805	3694180	2,97	2544353	1,22	1144	69	0.116189	1	0.918,0.722	0.939,0.923	-0.111
9054	ENSG00000198431	TXNRD1	chr12	+	104682708	104682818	104680799	104680887	104705067	104705190	9054	691105	8249	561110	3163	177	81	0.116286	1	0.798,0.67	0.895,0.757	-0.092
5255	ENSG00000107815	C10orf2	chr10	+	102750625	102750767	102749400	102749641	102752946	102753337	5255	1,86	0,7	5123	0,2	213	85	0.116611	1	1.0,0.831	1.0,0.961	-0.065
33638	ENSG00000183323	CCDC125	chr5	-	68609811	68609873	68606944	68607031	68616063	68616407	33638	1,8	0,8	1,12	1,2	105	80	0.116672	1	1.0,0.432	0.432,0.821	0.09
30792	ENSG00000115977	AAK1	chr2	-	69709842	69709944	69707991	69708093	69723116	69723212	30792	0,0	1,1	3,3	0,2	173	85	0.116754	1	0.0,0.0	1.0,0.424	-0.712
7804	ENSG00000196712	NF1	chr17	+	29579955	29580018	29576001	29576137	29585361	29585520	7804	6,14	4,28	2,8	7,29	112	85	0.116871	1	0.532,0.275	0.178,0.173	0.228
10466	ENSG00000083093	PALB2	chr16	-	23625324	23625412	23614482	23614990	23632682	23632799	10466	5,17	0,4	4,23	0,0	162	85	0.116875	1	1.0,0.69	1.0,1.0	-0.155
3172	ENSG00000116539	ASH1L	chr1	-	155315753	155315998	155313973	155314064	155316173	155316260	3172	0,3	11,94	0,16	1,93	310	79	0.117001	1	0.0,0.008	0.0,0.042	-0.017
6592	ENSG00000213865	C8orf44-SGK3,C8orf44	chr8	+	67589876	67590189	67579852	67579936	67590453	67590535	6592	6152	4,1	13203	0,9	366	67	0.117009	1	0.215,0.965	1.0,0.805	-0.313
15902	ENSG00000162241	SLC25A45	chr11	-	65144803	65144894	65144288	65144547	65146846	65147032	15902	0,8	5,19	0,8	3,86	168	85	0.117031	1	0.0,0.176	0.0,0.045	0.066
4919	ENSG00000157654	AKAP2,PALM2-AKAP2	chr9	+	112918598	112918777	112898406	112900819	112930678	112932189	4919	601078	11202	30724	1,89	250	85	0.117096	1	0.65,0.645	0.911,0.734	-0.175
18545	ENSG00000161010	C5orf45	chr5	-	179274977	179275066	179268906	179269064	179280377	179280437	18545	4,77	0,16	2102	0,7	132	53	0.117105	1	1.0,0.659	1.0,0.854	-0.098
66101	ENSG00000135916	ITM2C	chr2	+	231738131	231738272	231729614	231729860	231740334	231740523	66101	572928	13714	252888	1486	212	85	0.117108	1	0.637,0.622	0.909,0.704	-0.177
59649	ENSG00000185596	none_found	chr15	+	102512025	102512252	102506272	102506426	102512798	102512897	59649	0,7	15373	0,45	2367	298	85	0.117133	1	0.0,0.005	0.0,0.034	-0.015
50792	ENSG00000064115	TM7SF3	chr12	-	27129192	27129290	27128509	27128591	27148169	27148341	50792	83776	4,45	95751	0,19	160	75	0.117144	1	0.907,0.89	1.0,0.949	-0.076
70994	ENSG00000188647	PTAR1	chr9	-	72365696	72365866	72356707	72356774	72374768	72374858	70994	992603	2,68	611570	2,94	214	58	0.117146	1	0.931,0.912	0.892,0.819	0.066
48383	ENSG00000205744	DENND1C	chr19	-	6479997	6480062	6479869	6479913	6481689	6481798	48383	5,11	3,0	1,30	2,9	68	37	0.117313	1	0.476,1.0	0.214,0.645	0.309
59263	ENSG00000084234	APLP2	chr11	+	130005457	130005610	130003523	130003623	130010292	130010378	59263	44376	0,3	14339	0,15	218	79	0.117381	1	1.0,0.978	1.0,0.891	0.043
25804	ENSG00000068745	IP6K2	chr3	-	48752821	48752960	48732056	48732854	48754589	48754625	25804	1,88	11441	3278	11600	154	29	0.117385	1	0.017,0.036	0.049,0.08	-0.038
62934	ENSG00000033178	UBA6	chr4	-	68506868	68506946	68504660	68504842	68510415	68510496	62934	12160	0,30	6,88	4,23	131	74	0.117414	1	1.0,0.751	0.459,0.684	0.304
44367	ENSG00000171466	ZNF562	chr19	-	9768684	9768811	9763439	9764557	9785690	9785776	44367	3,24	0,6	2,20	0,0	192	79	0.117493	1	1.0,0.622	1.0,1.0	-0.189
27678	ENSG00000119801	YPEL5	chr2	+	30371110	30371171	30369872	30369928	30379493	30379658	27678	1,18	3107	5,30	3,89	72	49	0.117525	1	0.185,0.103	0.531,0.187	-0.215
16185	ENSG00000050130	JKAMP	chr14	+	59967908	59967985	59965444	59965626	59970571	59970992	16185	10121	1,12	11120	0,3	140	85	0.117525	1	0.859,0.86	1.0,0.96	-0.121
33672	ENSG00000118513	MYB	chr6	+	135518098	135518461	135516885	135517140	135520045	135520188	33672	1,99	112581	9,94	68310	434	85	0.117685	1	0.002,0.032	0.025,0.056	-0.024
20944	ENSG00000075303	SLC25A40	chr7	-	87466044	87466125	87465482	87465676	87470947	87471029	20944	26128	0,4	27,71	5,5	138	75	0.117738	1	1.0,0.946	0.746,0.885	0.157
66993	ENSG00000159921	GNE	chr9	-	36236828	36236981	36233916	36234129	36246027	36246479	66993	31372	1,23	24361	1,2	224	85	0.117761	1	0.922,0.86	0.901,0.986	-0.052
12119	ENSG00000130985	UBA1	chrX	+	47057707	47057754	47053227	47053423	47058201	47058318	12119	1108	311780	5146	41774	80	85	0.117802	1	0.033,0.061	0.57,0.08	-0.278
49055	ENSG00000126581	BECN1	chr17	-	40965965	40966026	40962325	40962946	40967925	40968072	49055	1,5	0,1	4,15	0,0	108	85	0.117868	1	1.0,0.797	1.0,1.0	-0.101
72315	ENSG00000149187	CELF1	chr11	-	47522412	47522484	47521004	47521156	47528409	47528449	72315	1,9	0,2	3,16	0,0	78	33	0.117925	1	1.0,0.656	1.0,1.0	-0.172
73386	ENSG00000137269	LRRC1	chr6	+	53743790	53743869	53659533	53660213	53747684	53747774	73386	3,36	0,5	11,40	0,1	142	83	0.117948	1	1.0,0.808	1.0,0.959	-0.076
24973	ENSG00000090054	SPTLC1	chr9	-	94841715	94841848	94830247	94830380	94842297	94842370	24973	4,10	11119	3,14	5,51	185	66	0.117985	1	0.115,0.029	0.176,0.089	-0.061
34808	ENSG00000120438	TCP1	chr6	-	160208774	160208903	160204972	160205099	160210436	160210704	34808	52832	0,102	51575	0,27	200	85	0.11799	1	1.0,0.776	1.0,0.901	-0.063
59411	ENSG00000183765	CHEK2	chr22	-	29099492	29099554	29095825	29095925	29105993	29106047	59411	9,26	2,1	5,12	0,5	72	47	0.118024	1	0.746,0.944	1.0,0.61	0.04
71328	ENSG00000146757	ZNF92	chr7	+	64852814	64852941	64838711	64838913	64853718	64853814	71328	21213	2,34	5178	0,11	198	85	0.11804	1	0.818,0.729	1.0,0.874	-0.164
51995	ENSG00000127603	MACF1	chr1	+	39781184	39781363	39776502	39776672	39782062	39782201	51995	12,82	0,0	4,74	0,4	250	85	0.118045	1	1.0,1.0	1.0,0.863	0.069
64098	ENSG00000119522	DENND1A	chr9	-	126371714	126371760	126345447	126345549	126414291	126414402	64098	12,40	0,5	21,92	0,0	78	85	0.118125	1	1.0,0.897	1.0,1.0	-0.051
52945	ENSG00000168958	MFF	chr2	+	228217229	228217289	228211941	228212100	228220392	228220477	52945	12116	0,15	8102	6,17	99	78	0.118229	1	1.0,0.859	0.512,0.825	0.261
62123	ENSG00000138380	ALS2CR8	chr2	+	203789019	203789138	203782599	203782766	203806582	203806703	62123	4,9	1,27	2,5	2,47	190	85	0.118365	1	0.642,0.13	0.309,0.045	0.209
12642	ENSG00000135127	CCDC64	chr12	+	120510314	120510533	120509506	120509605	120518690	120518821	12642	10380	1,9	6231	0,18	290	85	0.118483	1	0.746,0.925	1.0,0.79	-0.06
31991	ENSG00000112992	NNT	chr5	+	43619133	43619221	43615949	43616167	43624133	43624222	31991	16103	2,4	6,71	0,11	159	82	0.118547	1	0.805,0.93	1.0,0.769	-0.017
39829	ENSG00000248499	none_found	chrX	+	70920670	70920893	70917045	70917151	70922521	70926305	39829	7135	0,21	19348	4100	294	85	0.118788	1	1.0,0.65	0.579,0.502	0.285
11225	ENSG00000187187	ZNF546	chr19	+	40504154	40504317	40503767	40503822	40512002	40512089	11225	2,1	1,6	1,8	0,3	192	43	0.11879	1	0.309,0.036	1.0,0.374	-0.515
30569	ENSG00000196233	LCOR	chr10	+	98714709	98715591	98711859	98711953	98718168	98724188	30569	47517	0,19	55304	1,2	953	85	0.118881	1	1.0,0.708	0.831,0.931	-0.027
26575	ENSG00000182923	CEP63	chr3	+	134277991	134278271	134270767	134270854	134280218	134283870	26575	2,20	16,50	4,27	4,37	346	80	0.118931	1	0.028,0.085	0.188,0.144	-0.109
1420	ENSG00000139405	C12orf52	chr12	+	113623997	113624121	113623330	113623826	113624487	113624853	1420	8132	0,15	8173	0,6	195	85	0.118946	1	1.0,0.793	1.0,0.926	-0.067
60599	ENSG00000153310	none_found	chr8	-	130983188	130983241	130916744	130916831	131028852	131028883	60599	1,34	0,4	1,42	0,0	41	19	0.118975	1	1.0,0.798	1.0,1.0	-0.101
29251	ENSG00000164031	DNAJB14	chr4	-	100848873	100848995	100845916	100845972	100849698	100849774	29251	5,22	0,0	2,10	0,2	141	33	0.119031	1	1.0,1.0	1.0,0.539	0.23
56203	ENSG00000081052	COL4A4	chr2	-	227875028	227875217	227872733	227873020	227876896	227877013	56203	1,16	0,3	2,22	0,0	260	85	0.11907	1	1.0,0.636	1.0,1.0	-0.182
65036	ENSG00000026297	RNASET2	chr6	-	167352382	167352496	167343032	167343279	167369584	167370099	65036	1,23	0,6	5,18	2,0	185	85	0.119115	1	1.0,0.638	0.535,1.0	0.051
1608	ENSG00000172273	HINFP	chr11	+	118997644	118997835	118992325	118992349	119001434	119001664	1608	19589	0,0	3618	0,8	194	17	0.119164	1	1.0,1.0	1.0,0.871	0.065
64095	ENSG00000119522	DENND1A	chr9	-	126433569	126433650	126429304	126429358	126519981	126520038	64095	9,19	0,3	13,52	0,1	75	12	0.119329	1	1.0,0.503	1.0,0.893	-0.195
43112	ENSG00000163681	SLMAP	chr3	+	57911571	57911661	57908615	57908750	57913022	57913674	43112	8,97	2,61	6,50	1,88	166	85	0.119438	1	0.672,0.449	0.754,0.225	0.071
55409	ENSG00000147443	DOK2	chr8	-	21769411	21769499	21768183	21768368	21769739	21770021	55409	6,87	1,29	2105	0,11	162	85	0.119543	1	0.759,0.612	1.0,0.834	-0.232
41326	ENSG00000121039	RDH10	chr8	+	74233166	74233312	74209250	74209664	74234913	74235045	41326	7,23	0,3	4,47	0,0	217	85	0.119792	1	1.0,0.75	1.0,1.0	-0.125
7339	ENSG00000183401	CCDC159	chr19	+	11462732	11462809	11461483	11461679	11464126	11464248	7339	2,43	0,10	2,87	0,7	140	85	0.119794	1	1.0,0.723	1.0,0.883	-0.08
8829	ENSG00000135776	ABCB10	chr1	-	229683245	229683448	229677983	229678118	229684980	229685181	8829	37616	4,17	65815	1,5	274	85	0.119856	1	0.742,0.918	0.953,0.981	-0.137
67983	ENSG00000125952	MAX	chr14	-	65544045	65544146	65543175	65543381	65544630	65544754	67983	12146	14266	6166	20439	172	85	0.120002	1	0.298,0.213	0.129,0.157	0.112
12770	ENSG00000101773	RBBP8	chr18	+	20548768	20548881	20529580	20529676	20562180	20562356	12770	32177	5,4	45170	0,1	184	85	0.120074	1	0.747,0.953	1.0,0.987	-0.144
35104	ENSG00000138303	ASCC1	chr10	-	73892814	73892939	73856277	73857208	73921295	73921432	35104	7,82	0,6	1102	0,0	196	85	0.120082	1	1.0,0.856	1.0,1.0	-0.072
33684	ENSG00000118513	MYB	chr6	+	135517863	135518461	135516885	135517055	135520045	135520188	33684	2199	0,7	13127	0,0	669	85	0.120095	1	1.0,0.783	1.0,1.0	-0.109
6308	ENSG00000174032	SLC25A30	chr13	-	45985867	45986073	45985496	45985615	45992434	45992513	6308	1,6	2,39	0,19	3,25	264	72	0.120158	1	0.12,0.04	0.0,0.172	-0.006
61849	ENSG00000141577	AZI1	chr17	-	79172676	79172771	79171914	79172097	79173180	79173349	61849	9276	0,33	5253	0,55	170	85	0.120177	1	1.0,0.807	1.0,0.697	0.055
53902	ENSG00000164305	CASP3	chr4	-	185569618	185569785	185559554	185559622	185570548	185570601	53902	6225	2,49	4317	0,37	175	22	0.120229	1	0.274,0.366	1.0,0.519	-0.44
9150	ENSG00000103199	ZNF500	chr16	-	4812271	4812336	4810492	4810589	4812573	4812757	9150	8,86	0,1	2,93	0,9	116	85	0.120237	1	1.0,0.984	1.0,0.883	0.05
53901	ENSG00000164305	CASP3	chr4	-	185569656	185569785	185559554	185559622	185570548	185570601	53901	3154	2,49	1220	0,37	137	22	0.120433	1	0.194,0.335	1.0,0.488	-0.48
30917	ENSG00000124615	MOCS1	chr6	-	39876815	39876878	39872033	39874893	39877578	39877699	30917	23296	1,50	15188	8,36	112	85	0.120566	1	0.946,0.818	0.587,0.799	0.189
5021	ENSG00000253352	none_found	chr22	+	31368033	31368158	31367352	31367765	31368909	31369587	5021	3,59	6,42	9,90	14169	196	85	0.120593	1	0.178,0.379	0.218,0.188	0.075
19917	ENSG00000151806	GUF1	chr4	+	44682710	44682859	44680510	44680804	44683139	44683220	19917	22124	0,0	20,90	0,5	209	74	0.1206	1	1.0,1.0	1.0,0.864	0.068
29503	ENSG00000149346	C20orf94	chr20	+	10438823	10438879	10415950	10416101	10536878	10536968	29503	5,27	0,8	2,21	3,10	96	83	0.120626	1	1.0,0.745	0.366,0.645	0.367
72770	ENSG00000181896	ZNF101	chr19	+	19788672	19788795	19779659	19779775	19789989	19790841	72770	44427	4,46	12371	0,17	194	85	0.120802	1	0.828,0.803	1.0,0.905	-0.137
57572	ENSG00000185838	GNB1L	chr22	-	19808750	19808898	19794181	19794280	19841965	19842366	57572	35478	4,34	7530	0,12	219	85	0.12087	1	0.773,0.845	1.0,0.945	-0.163
29819	ENSG00000130475	FCHO1	chr19	+	17888945	17889037	17887443	17887495	17892039	17892152	29819	7,70	0,11	4,81	0,3	130	45	0.120951	1	1.0,0.688	1.0,0.903	-0.108
21278	ENSG00000089159	PXN	chr12	-	120664641	120664920	120661956	120662180	120703419	120703495	21278	0,9	5276	9,51	6347	334	69	0.120959	1	0.0,0.007	0.237,0.029	-0.13
66913	ENSG00000138246	DNAJC13	chr3	+	132169490	132169691	132153381	132153462	132172141	132172348	66913	14,65	0,7	13,74	0,1	261	74	0.120995	1	1.0,0.725	1.0,0.955	-0.115
38008	ENSG00000168010	ATG16L2	chr11	+	72534810	72534842	72533892	72534006	72535104	72535167	38008	3,27	9,40	0,19	1,78	25	56	0.121027	1	0.427,0.602	0.0,0.353	0.338
3546	ENSG00000101639	CEP192	chr18	+	13113584	13113704	13104982	13105078	13116375	13116502	3546	4,62	0,4	11,67	0,0	191	85	0.12112	1	1.0,0.873	1.0,1.0	-0.064
67415	ENSG00000141279	NPEPPS	chr17	+	45654446	45654526	45646782	45646860	45656755	45656822	67415	0,15	3,28	0,5	3,38	107	46	0.12116	1	0.0,0.187	0.0,0.054	0.067
11220	ENSG00000123453	SARDH	chr9	-	136555501	136555649	136550314	136550408	136568037	136568151	11220	10,86	3,12	7167	0,10	219	85	0.121283	1	0.564,0.736	1.0,0.866	-0.283
46824	ENSG00000110497	AMBRA1	chr11	-	46534276	46534363	46529740	46529920	46563494	46564948	46824	3,65	0,74	6,90	0,61	160	85	0.121367	1	1.0,0.318	1.0,0.439	-0.061
16130	ENSG00000110075	PPP6R3	chr11	+	68282495	68282634	68272612	68272739	68286968	68287119	16130	1,8	1,23	0,3	2,33	210	85	0.121368	1	0.288,0.123	0.0,0.035	0.188
22482	ENSG00000144893	MED12L	chr3	+	150910336	150910441	150908503	150908718	150911276	150911532	22482	5,40	5,22	3,29	2,6	176	85	0.121391	1	0.326,0.468	0.42,0.7	-0.163
43824	ENSG00000103426	CORO7-PAM16,CORO7	chr16	-	4457501	4457685	4445289	4445340	4466459	4466621	43824	5159	0,7	2236	0,1	214	44	0.121607	1	1.0,0.824	1.0,0.98	-0.078
52062	ENSG00000141337	ARSG	chr17	+	66391213	66391334	66381204	66381313	66397500	66397591	52062	4,23	0,2	2,51	2,15	191	84	0.121679	1	1.0,0.835	0.305,0.599	0.466
40416	ENSG00000205581	HMGN1	chr21	-	40717755	40717884	40717071	40717200	40719304	40719404	40416	27247	3,35	6185	4,38	200	85	0.121915	1	0.793,0.75	0.389,0.674	0.24
64490	ENSG00000110321	EIF4G2	chr11	-	10828801	10828928	10828366	10828432	10830251	10830290	64490	721344	6,19	1161556	0,14	119	6	0.121935	1	0.377,0.781	1.0,0.849	-0.346
39727	ENSG00000087088	BAX	chr19	+	49458804	49458856	49458185	49458219	49459454	49459590	39727	18,96	9,56	10177	3,64	45	27	0.121973	1	0.545,0.507	0.667,0.624	-0.119
8154	ENSG00000103222	ABCC1	chr16	+	16110352	16110478	16103632	16103758	16126965	16127027	8154	15215	0,11	23167	0,1	167	55	0.122024	1	1.0,0.866	1.0,0.982	-0.058
73141	ENSG00000125703	ATG4C	chr1	+	63307098	63307218	63300446	63300523	63329662	63329791	73141	24,41	2,2	30,55	0,0	176	70	0.122127	1	0.827,0.891	1.0,1.0	-0.141
46811	ENSG00000127804	METTL16	chr17	-	2371054	2371170	2367501	2367644	2376817	2376958	46811	11,95	1,20	12,60	0,5	187	85	0.122132	1	0.833,0.683	1.0,0.845	-0.164
38821	ENSG00000138698	RAP1GDS1	chr4	+	99300167	99300314	99273626	99273752	99313102	99313160	38821	1021601	7,61	981476	2,23	184	51	0.122222	1	0.802,0.879	0.931,0.947	-0.099
7848	ENSG00000181544	FANCB	chrX	-	14887044	14887165	14882681	14883702	14891107	14891174	7848	3121	0,29	12112	1,13	167	60	0.122254	1	1.0,0.6	0.812,0.756	0.016
52609	ENSG00000073060	SCARB1	chr12	-	125294719	125294835	125292306	125292473	125296415	125296511	52609	35476	3,25	19463	0,5	187	85	0.122412	1	0.841,0.896	1.0,0.977	-0.12
63329	ENSG00000105698	USF2	chr19	+	35760705	35760906	35760483	35760602	35761349	35761500	63329	1702950	9159	603899	6352	272	85	0.122475	1	0.855,0.853	0.758,0.776	0.087
49977	ENSG00000104375	STK3	chr8	-	99650687	99650788	99607557	99608397	99718694	99718862	49977	0,0	12,63	0,5	8,32	172	85	0.122477	1	0.0,0.0	0.0,0.072	-0.036
9653	ENSG00000166004	KIAA1731	chr11	+	93457419	93457541	93456206	93456455	93458816	93458997	9653	8,97	0,6	12,88	0,0	193	85	0.122551	1	1.0,0.877	1.0,1.0	-0.062
16977	ENSG00000100211	CBY1	chr22	+	39061550	39061690	39052680	39052755	39064021	39064137	16977	2,23	4,51	2,64	0,71	194	68	0.12262	1	0.149,0.136	1.0,0.24	-0.478
6606	ENSG00000134759	ELP2	chr18	+	33740894	33740967	33739920	33739978	33751009	33751123	6606	3,45	0,0	3,26	0,3	98	51	0.122918	1	1.0,1.0	1.0,0.819	0.091
29772	ENSG00000175066	GK5	chr3	-	141903552	141904635	141901764	141901891	141904770	141904831	29772	33326	6,35	16268	9,53	1123	54	0.123013	1	0.209,0.309	0.079,0.196	0.122
29610	ENSG00000136404	TM6SF1	chr15	+	83793423	83793528	83788329	83788433	83795506	83795599	29610	3,79	0,18	1,62	0,0	176	85	0.123052	1	1.0,0.679	1.0,1.0	-0.16
61818	ENSG00000166352	C11orf74	chr11	+	36657600	36657667	36631630	36631789	36669565	36669705	61818	33100	12,27	14,68	5,6	120	85	0.123125	1	0.661,0.724	0.665,0.889	-0.085
32600	ENSG00000111540	RAB5B	chr12	+	56373155	56373258	56367880	56367923	56380652	56380907	32600	0,10	6,44	1,18	5,26	125	36	0.123192	1	0.0,0.061	0.054,0.166	-0.08
36134	ENSG00000145907	G3BP1	chr5	+	151173719	151173810	151170449	151170623	151175039	151175136	36134	102674	4,58	87871	2,22	168	85	0.123235	1	0.928,0.855	0.957,0.952	-0.063
34467	ENSG00000128915	NARG2	chr15	-	60758792	60758912	60747524	60747641	60760259	60760361	34467	12,54	0,0	11,40	0,4	191	85	0.123362	1	1.0,1.0	1.0,0.817	0.092
35846	ENSG00000144036	EXOC6B	chr2	-	72960199	72960247	72958283	72958374	72968432	72968598	35846	5,35	0,6	1,46	0,0	81	84	0.12339	1	1.0,0.858	1.0,1.0	-0.071
35190	ENSG00000238083	LRRC37A2	chr17	+	44627780	44627885	44625677	44627209	44630765	44630815	35190	2,29	0,1	4,25	0,8	134	43	0.123399	1	1.0,0.903	1.0,0.501	0.201
44647	ENSG00000169621	APLF	chr2	+	68795367	68795482	68794472	68794519	68804951	68805135	44647	0,0	3,11	1,7	1,17	141	40	0.123453	1	0.0,0.0	0.221,0.105	-0.163
46211	ENSG00000186908	ZDHHC17	chr12	+	77214837	77214947	77209636	77209799	77216185	77216311	46211	2,71	8,52	2,24	7,59	181	85	0.123487	1	0.105,0.391	0.118,0.16	0.109
45738	ENSG00000088808	PPP1R13B	chr14	-	104251131	104251251	104245081	104245158	104263707	104263855	45738	10,26	0,6	13,33	0,1	176	70	0.12356	1	1.0,0.633	1.0,0.929	-0.148
53949	ENSG00000138621	PPCDC	chr15	+	75320587	75320794	75315895	75315967	75340893	75341062	53949	12,72	1,8	5152	0,5	258	65	0.123659	1	0.751,0.694	1.0,0.885	-0.22
14736	ENSG00000119912	IDE	chr10	-	94238401	94238546	94235701	94235751	94243011	94243094	14736	3,3	1,3	3,7	0,0	165	34	0.123675	1	0.382,0.171	1.0,1.0	-0.724
48880	ENSG00000111885	MAN1A1	chr6	-	119569424	119569519	119525923	119526047	119611847	119611928	48880	1,17	0,3	8,15	0,0	159	74	0.123784	1	1.0,0.725	1.0,1.0	-0.137
65787	ENSG00000117054	ACADM	chr1	+	76215103	76215244	76205664	76205795	76226806	76227055	65787	17,79	0,6	20,75	0,0	212	85	0.123786	1	1.0,0.841	1.0,1.0	-0.08
12565	ENSG00000081791	KIAA0141	chr5	+	141316762	141316922	141314058	141314151	141318085	141318325	12565	3,32	0,41	2,73	0,39	231	85	0.123849	1	1.0,0.223	1.0,0.408	-0.092
28971	ENSG00000109466	KLHL2	chr4	+	166242463	166242527	166238977	166239121	166243183	166243690	28971	2,6	4,67	2,14	6,43	114	85	0.12386	1	0.272,0.063	0.199,0.195	-0.03
34121	ENSG00000196290	NIF3L1	chr2	+	201761798	201761937	201759986	201760113	201764107	201764191	34121	29296	0,17	16302	0,0	202	77	0.123868	1	1.0,0.869	1.0,1.0	-0.066
55943	ENSG00000100359	SGSM3	chr22	+	40797596	40797679	40796699	40796817	40798142	40798209	55943	14843	4281	131092	3235	127	60	0.123869	1	0.623,0.586	0.672,0.687	-0.075
29031	ENSG00000070882	OSBPL3	chr7	-	24902818	24902911	24901231	24901388	24903114	24903218	29031	8,77	1,20	9,35	2,19	170	85	0.124122	1	0.8,0.658	0.692,0.479	0.144
31033	ENSG00000104388	RAB2A	chr8	+	61471410	61471482	61429782	61429812	61496766	61496849	31033	5351	0,11	3353	0,0	59	14	0.124138	1	1.0,0.883	1.0,1.0	-0.059
5689	ENSG00000005483	MLL5	chr7	+	104678572	104678646	104654653	104654982	104681285	104681470	5689	2,52	17487	9,75	14395	134	85	0.124208	1	0.069,0.063	0.29,0.107	-0.132
48510	ENSG00000164181	ELOVL7	chr5	-	60083160	60083258	60067729	60067920	60139986	60140037	48510	2,9	0,2	1,2	0,4	129	44	0.124317	1	1.0,0.606	1.0,0.146	0.23
59292	ENSG00000163625	WDFY3	chr4	-	85818063	85818163	85781564	85781775	85887361	85887503	59292	1,13	0,4	1,15	0,0	171	85	0.124382	1	1.0,0.618	1.0,1.0	-0.191
30675	ENSG00000185324	CDK10	chr16	+	89755659	89755714	89753077	89753205	89756960	89757032	30675	1,84	5178	0,137	2182	76	65	0.124647	1	0.146,0.288	0.0,0.392	0.021
59235	ENSG00000071462	WBSCR22	chr7	+	73098096	73098330	73097955	73098003	73100965	73101061	59235	14357	0,1	1429	2,6	261	41	0.124658	1	1.0,0.982	0.073,0.918	0.496
32795	ENSG00000134444	KIAA1468	chr18	+	59966022	59966093	59958775	59958864	59972646	59974355	32795	7,39	0,4	6,69	0,0	125	82	0.124779	1	1.0,0.865	1.0,1.0	-0.068
43136	ENSG00000163714	U2SURP	chr3	+	142742816	142742860	142741694	142741906	142745990	142746095	43136	25128	1,32	23169	0,17	74	85	0.124807	1	0.966,0.821	1.0,0.919	-0.066
28786	ENSG00000175054	ATR	chr3	-	142226772	142226951	142218468	142218560	142231101	142231312	28786	8,72	0,7	6,53	0,0	250	85	0.124869	1	1.0,0.778	1.0,1.0	-0.111
69087	ENSG00000131149	KIAA0182	chr16	+	85667519	85667738	85646821	85647004	85682157	85682357	69087	951665	6283	1262450	4276	290	85	0.125012	1	0.823,0.633	0.902,0.722	-0.084
66938	ENSG00000136270	TBRG4	chr7	-	45144136	45144308	45142931	45143042	45145039	45145363	66938	44529	1,36	26920	0,21	243	85	0.125056	1	0.939,0.837	1.0,0.939	-0.082
67650	ENSG00000172113	NME6	chr3	-	48339916	48340013	48336564	48336725	48342785	48342848	67650	2,33	0,2	2,51	0,14	141	56	0.125174	1	1.0,0.868	1.0,0.591	0.138
53508	ENSG00000106462	EZH2	chr7	-	148543561	148543690	148529725	148529842	148581255	148581375	53508	36342	0,130	40397	0,48	200	85	0.125322	1	1.0,0.528	1.0,0.779	-0.125
50579	ENSG00000139372	TDG	chr12	+	104370695	104370838	104359680	104359838	104373608	104373850	50579	40290	1,41	15436	0,25	214	85	0.125705	1	0.941,0.737	1.0,0.874	-0.098
66423	ENSG00000106415	GLCCI1	chr7	+	8124526	8124647	8110550	8110761	8125822	8128710	66423	12157	1,14	15115	0,3	192	85	0.125777	1	0.842,0.832	1.0,0.944	-0.135
70186	ENSG00000138400	MDH1B	chr2	-	207619732	207620229	207615657	207615799	207621621	207621764	70186	2,15	0,1	4,56	0,0	568	85	0.125792	1	1.0,0.692	1.0,1.0	-0.154
29154	ENSG00000141293	SKAP1	chr17	-	46262084	46262209	46259755	46259819	46265204	46265288	29154	9109	0,5	15106	0,0	160	49	0.125801	1	1.0,0.87	1.0,1.0	-0.065
18973	ENSG00000122694	GLIPR2	chr9	+	36150868	36150946	36136741	36136788	36162358	36163910	18973	4101	0,24	4159	1,7	97	40	0.125877	1	1.0,0.634	0.623,0.904	0.053
44955	ENSG00000137103	TMEM8B	chr9	+	35841130	35841264	35829773	35829952	35845971	35846065	44955	7,87	0,4	1,83	0,12	205	85	0.125949	1	1.0,0.9	1.0,0.741	0.079
11218	ENSG00000123453	SARDH	chr9	-	136550314	136550408	136536656	136536819	136559379	136559493	11218	7,85	0,5	7167	0,0	170	85	0.125986	1	1.0,0.895	1.0,1.0	-0.052
68188	ENSG00000174485	DENND4A	chr15	-	66053697	66053776	66048477	66048810	66084347	66084631	68188	2,23	0,9	0,36	2,4	144	85	0.126038	1	1.0,0.601	0.0,0.842	0.38
59497	ENSG00000166169	POLL	chr10	-	103345618	103345913	103344358	103344676	103347002	103347163	59497	4,92	0,10	3214	0,8	366	85	0.12604	1	1.0,0.681	1.0,0.861	-0.09
26	ENSG00000166012	none_found	chr11	-	93467790	93467826	93466515	93466563	93469306	93469470	26	10,50	0,0	5,42	0,6	29	41	0.126055	1	1.0,1.0	1.0,0.908	0.046
72049	ENSG00000188735	TMEM120B	chr12	+	122186231	122186348	122150657	122150870	122188285	122188345	72049	2,62	0,4	2,82	0,0	156	53	0.126077	1	1.0,0.84	1.0,1.0	-0.08
51709	ENSG00000126261	UBA2	chr19	+	34922765	34922836	34919267	34919475	34925772	34925873	51709	0,45	2,17	2,29	0,5	128	85	0.126169	1	0.0,0.637	1.0,0.794	-0.579
30857	ENSG00000183495	EP400	chr12	+	132475951	132476001	132475180	132475259	132489621	132489729	30857	2,7	0,3	3,10	0,0	73	72	0.126188	1	1.0,0.697	1.0,1.0	-0.151
13296	ENSG00000153827	TRIP12	chr2	-	230725121	230725247	230723500	230724290	230744697	230744844	13296	33537	5238	22449	9278	197	85	0.126272	1	0.74,0.493	0.513,0.411	0.155
16416	ENSG00000113356	POLR3G	chr5	+	89781351	89781501	89770705	89770837	89783816	89783946	16416	9115	0,7	26155	0,2	221	85	0.12633	1	1.0,0.863	1.0,0.968	-0.052
26048	ENSG00000119048	UBE2B	chr5	+	133724015	133724104	133710073	133710154	133725915	133726474	26048	41266	1120	44235	1,25	153	74	0.126335	1	0.952,0.517	0.955,0.82	-0.153
39178	ENSG00000064607	SUGP2	chr19	-	19102148	19102362	19101702	19101958	19105174	19105295	39178	55961	13115	25590	2,41	285	85	0.12636	1	0.558,0.714	0.788,0.811	-0.164
65591	ENSG00000163249	CCNYL1	chr2	+	208611770	208611937	208576661	208576840	208618311	208620898	65591	6,13	0,0	1,9	0,2	238	85	0.126848	1	1.0,1.0	1.0,0.616	0.192
1118	ENSG00000173230	GOLGB1	chr3	-	121441108	121441225	121437234	121437348	121445759	121445888	1118	8237	1,61	7130	0,18	188	85	0.126854	1	0.783,0.637	1.0,0.766	-0.173
62217	ENSG00000189057	FAM111B	chr11	+	58877012	58877179	58876140	58876185	58891651	58894867	62217	63318	1,15	27394	1,37	191	38	0.126996	1	0.926,0.808	0.843,0.679	0.106
64757	ENSG00000126698	DNAJC8	chr1	-	28556641	28556763	28555432	28555534	28559431	28559536	64757	7,64	52489	10118	28524	193	85	0.127026	1	0.056,0.054	0.136,0.09	-0.058
15067	ENSG00000166435	XRRA1	chr11	-	74632258	74632392	74618189	74618318	74647928	74648113	15067	1,87	0,6	4110	0,1	205	85	0.127033	1	1.0,0.857	1.0,0.979	-0.061
33433	ENSG00000120798	NR2C1	chr12	-	95434251	95434373	95422162	95422300	95442843	95443009	33433	7195	4,9	14187	0,6	193	85	0.127152	1	0.435,0.905	1.0,0.932	-0.296
42927	ENSG00000089053	ANAPC5	chr12	-	121769029	121769231	121768385	121768475	121773335	121773526	42927	17415	0,29	17497	0,12	271	83	0.127234	1	1.0,0.814	1.0,0.927	-0.056
4042	ENSG00000151176	PLBD2	chr12	+	113806920	113807014	113796370	113796695	113810453	113810612	4042	4,54	0,6	1,90	0,1	170	85	0.127314	1	1.0,0.818	1.0,0.978	-0.08
45898	ENSG00000165795	NDRG2	chr14	-	21492188	21492255	21491399	21491480	21493187	21493219	45898	3,57	0,22	3,79	0,13	49	14	0.12735	1	1.0,0.425	1.0,0.635	-0.105
36951	ENSG00000137075	RNF38	chr9	-	36390463	36390613	36375930	36376124	36424609	36424680	36951	2,37	0,19	4,81	0,20	200	64	0.127365	1	1.0,0.384	1.0,0.564	-0.09
7281	ENSG00000110422	HIPK3	chr11	+	33370067	33370364	33369397	33369559	33370692	33370833	7281	84614	1,23	89603	0,6	368	85	0.127426	1	0.951,0.86	1.0,0.959	-0.074
41172	ENSG00000173988	none_found	chr13	+	46802799	46802868	46787136	46787254	46808326	46808484	41172	2,8	0,2	5,14	0,0	124	85	0.127453	1	1.0,0.733	1.0,1.0	-0.133
9439	ENSG00000204116	CHIC1	chrX	+	72899488	72899548	72899160	72899217	72900789	72903050	9439	1,11	0,0	3,2	2,1	71	50	0.127471	1	1.0,1.0	0.514,0.585	0.451
[truncated: 52,288 more rows]

## Sheet: R_MATS WT vs L KD stimulated
MATS_ID	GeneID	geneSymbol	chr	strand	exonStart_0base	exonEnd	upstreamES	upstreamEE	downstreamES	downstreamEE	ID	IC_SAMPLE_1	SC_SAMPLE_1	IC_SAMPLE_2	SC_SAMPLE_2	IncFormLen	SkipFormLen	PValue	FDR	IncLevel1	IncLevel2	IncLevelDifference
57966	ENSG00000105202	FBL	chr19	-	40331256	40331427	40331053	40331155	40336930	40337054	57966	1272484	0,1	1371472	100395	242	85	0	0	1.0,0.999	0.325,0.567	0.554
53794	ENSG00000033867	SLC4A7	chr3	-	27477878	27478039	27475406	27475595	27478878	27479017	53794	103767	1,0	24231	14,21	232	85	1.93e-07	0.00437517	0.974,1.0	0.386,0.801	0.393
63719	ENSG00000132485	ZRANB2	chr1	-	71531360	71531435	71529019	71530820	71532458	71532617	63719	15129	28,95	21188	7,27	136	85	3.75e-07	0.00566316	0.251,0.459	0.652,0.813	-0.377
20872	ENSG00000125354	41888	chrX	-	118759297	118759342	118750678	118750705	118763280	118763471	20872	39416	2,57	54319	41128	38	20	2.25e-06	0.0254513	0.911,0.793	0.409,0.567	0.364
41742	ENSG00000111206	FOXM1	chr12	-	2974520	2974565	2973848	2973918	2975558	2975687	41742	5,91	2,94	24118	0,24	54	63	1.2e-05	0.103433	0.745,0.53	1.0,0.852	-0.289
37554	ENSG00000197694	SPTAN1	chr9	+	131371929	131371944	131371400	131371563	131373992	131374124	37554	3119	2,96	0,76	10213	16	85	1.37e-05	0.103433	0.889,0.868	0.0,0.655	0.551
55101	ENSG00000163006	CCDC138	chr2	+	109404487	109404545	109403216	109403371	109405307	109405422	55101	2,36	0,12	0,15	4,34	102	85	2.35e-05	0.147863	1.0,0.714	0.0,0.269	0.722
3952	ENSG00000140382	HMG20A	chr15	+	77740060	77740153	77713015	77713346	77750745	77750838	3952	0,14	19169	4,58	7,87	170	85	2.61e-05	0.147863	0.0,0.04	0.222,0.25	-0.216
25709	ENSG00000072818	ACAP1	chr17	+	7240630	7240688	7239847	7240106	7245266	7245386	25709	57772	10,76	73597	50192	102	85	3.02e-05	0.152007	0.826,0.894	0.549,0.722	0.225
39924	ENSG00000163565	IFI16	chr1	+	159015086	159015254	159002313	159002481	159021468	159023514	39924	37511	9115	40490	0,23	239	85	4.24e-05	0.171849	0.594,0.612	1.0,0.883	-0.339
25108	ENSG00000167615	LENG8	chr19	+	54962466	54962559	54960395	54960484	54963269	54963344	25108	1445184	2,68	1394025	15512	150	65	4.49e-05	0.171849	0.969,0.971	0.801,0.773	0.183
11296	ENSG00000132635	FAM113A	chr20	-	2816684	2816960	2815959	2816355	2818877	2819124	11296	1471468	10115	2131299	44321	347	85	4.85e-05	0.171849	0.783,0.758	0.543,0.498	0.25
25920	ENSG00000143393	PI4KB	chr1	-	151298647	151298849	151288048	151288985	151299746	151300133	25920	24310	11128	44402	2,52	273	85	5.03e-05	0.171849	0.405,0.43	0.873,0.706	-0.372
25110	ENSG00000167615	LENG8	chr19	+	54962466	54962559	54960064	54960488	54963269	54963344	25110	1144444	0,64	1173714	17385	153	68	5.31e-05	0.171849	1.0,0.969	0.754,0.811	0.202
44475	ENSG00000198911	SREBF2	chr22	+	42295240	42295557	42294652	42294785	42296333	42296502	44475	1273	531268	22323	23459	388	85	6.04e-05	0.182427	0.004,0.045	0.173,0.134	-0.129
9984	ENSG00000105287	PRKD2	chr19	-	47217119	47217258	47214163	47214295	47219387	47220384	9984	1131257	1,37	148658	21,89	210	85	7.77e-05	0.219954	0.979,0.932	0.74,0.75	0.211
60708	ENSG00000163110	PDLIM5	chr4	+	95444874	95445026	95376397	95376535	95494501	95494544	60708	15261	0,14	3100	4,36	174	36	8.79e-05	0.226707	1.0,0.794	0.134,0.365	0.648
5338	ENSG00000187239	FNBP1	chr9	-	132686122	132686275	132671168	132671278	132687238	132687436	5338	10202	37352	2,33	97267	224	85	9e-05	0.226707	0.093,0.179	0.008,0.045	0.11
5345	ENSG00000187239	FNBP1	chr9	-	132686122	132686305	132671168	132671278	132687238	132687436	5345	13250	37352	5,45	97267	254	85	0.000101078	0.241104	0.105,0.192	0.017,0.053	0.113
30777	ENSG00000186635	ARAP1	chr11	-	72403797	72403830	72399499	72399582	72404369	72404515	30777	1,87	6,92	12110	8,27	43	76	0.000106735	0.241866	0.228,0.626	0.726,0.878	-0.375
23046	ENSG00000081237	PTPRC	chr1	+	198663146	198663269	198661475	198661502	198665840	198666038	23046	7,56	7,40	0,25	15175	129	20	0.00014688	0.316988	0.134,0.178	0.0,0.022	0.145
12491	ENSG00000183955	SETD8	chr12	+	123873979	123874101	123868319	123868755	123875176	123875333	12491	9311	0,73	2128	4,92	193	85	0.000154631	0.318547	1.0,0.652	0.18,0.38	0.546
55820	ENSG00000083457	ITGAE	chr17	-	3626581	3626677	3623600	3623696	3626981	3627038	55820	36442	19235	29167	48225	135	50	0.0002013	0.39106	0.412,0.411	0.183,0.216	0.212
4426	ENSG00000253352	none_found	chr22	+	31368033	31368158	31367352	31367765	31368909	31369587	4426	5,41	6,45	0,30	17136	196	85	0.000207088	0.39106	0.265,0.283	0.0,0.087	0.231
36001	ENSG00000099968	BCL2L13	chr22	+	18178906	18178976	18171751	18171908	18209442	18211465	36001	5,55	1,26	33,83	2,5	126	85	0.000231837	0.420283	0.771,0.588	0.918,0.918	-0.239
39933	ENSG00000163565	IFI16	chr1	+	159019221	159019389	159002313	159002481	159021468	159023514	39933	52823	9115	58649	0,23	239	85	0.00026577	0.444293	0.673,0.718	1.0,0.909	-0.259
32325	ENSG00000100038	TOP3B	chr22	-	22325351	22325433	22324581	22324778	22326248	22326323	32325	6217	1,68	2143	13112	133	68	0.000272012	0.444293	0.754,0.62	0.073,0.395	0.453
3346	ENSG00000109534	GAR1	chr4	+	110737308	110737534	110736708	110736960	110739091	110739246	3346	12342	0,0	5,82	8,52	297	85	0.000274491	0.444293	1.0,1.0	0.152,0.311	0.769
22949	ENSG00000068745	IP6K2	chr3	-	48731891	48731958	48730885	48731673	48732522	48732854	22949	3,43	0,18	0,48	5,71	120	85	0.000324177	0.506622	1.0,0.629	0.0,0.324	0.653
50022	ENSG00000111790	FGFR1OP2	chr12	+	27113447	27113561	27110533	27110676	27116274	27116388	50022	5,58	23436	25141	32247	185	85	0.000402915	0.608684	0.091,0.058	0.264,0.208	-0.161
46247	ENSG00000112972	HMGCS1	chr5	-	43298110	43298236	43297103	43297268	43298619	43299077	46247	794645	161030	812059	0,243	197	85	0.000471343	0.689088	0.681,0.661	1.0,0.785	-0.222
47763	ENSG00000157985	AGAP1	chr2	+	236839408	236839567	236817381	236817550	236877105	236877267	47763	2,47	2,81	8,52	2,18	230	85	0.0005017	0.710548	0.27,0.177	0.596,0.516	-0.333
62894	ENSG00000156469	MTERFD1	chr8	-	97270584	97270928	97269189	97269342	97273728	97273817	62894	8344	1,51	17352	0,8	412	82	0.000546798	0.750952	0.614,0.573	1.0,0.898	-0.356
13289	ENSG00000166435	XRRA1	chr11	-	74620933	74621057	74617884	74618318	74632258	74632344	13289	0,5	10,65	2,27	7,32	189	79	0.000580513	0.771053	0.0,0.031	0.107,0.261	-0.168
58859	ENSG00000147601	TERF1	chr8	+	73942570	73942630	73939174	73939287	73944276	73944368	58859	2,42	16,21	0,16	35,39	106	85	0.00059546	0.771053	0.091,0.616	0.0,0.248	0.229
58196	ENSG00000155366	RHOC	chr1	-	113247721	113247745	113246265	113246428	113249699	113249747	58196	35385	3119	77324	32218	17	41	0.000645655	0.812826	0.966,0.886	0.853,0.782	0.108
43711	ENSG00000127152	BCL11B	chr14	-	99697681	99697894	99635623	99642532	99723807	99724176	43711	1571191	44435	304899	21195	284	85	0.000664557	0.814011	0.516,0.45	0.812,0.58	-0.213
40882	ENSG00000184277	TM2D3	chr15	-	102191898	102191976	102190206	102190364	102192473	102192585	40882	2125	21285	4202	9176	142	85	0.00069731	0.831652	0.054,0.208	0.21,0.407	-0.178
32445	ENSG00000136811	ODF2	chr9	+	131219476	131219716	131218431	131218534	131221845	131221936	32445	15266	5187	4109	23178	310	84	0.000786292	0.899119	0.448,0.278	0.045,0.142	0.269
4782	ENSG00000183814	LIN9	chr1	-	226483542	226483647	226475364	226475498	226485419	226485514	4782	1,22	0,35	4,22	0,3	176	85	0.000793556	0.899119	1.0,0.233	1.0,0.78	-0.273
32916	ENSG00000183020	AP2A2	chr11	+	1000431	1000598	994071	994245	1003721	1003804	32916	12,89	0,4	5,37	0,17	229	76	0.000837259	0.925498	1.0,0.881	1.0,0.419	0.231
44105	ENSG00000178234	GALNT11	chr7	+	151813988	151814123	151810329	151810483	151814241	151814460	44105	0,2	26120	6,13	7,54	206	85	0.000873243	0.942292	0.0,0.007	0.261,0.09	-0.172
1808	ENSG00000067066	SP100	chr2	+	231282305	231282380	231280980	231281043	231307651	231307814	1808	13171	2,52	29225	0,19	107	56	0.00096738	0.968874	0.773,0.632	1.0,0.861	-0.228
3348	ENSG00000109534	GAR1	chr4	+	110737308	110737534	110736665	110736701	110739091	110739246	3348	11215	0,0	3,47	0,9	241	29	0.000986492	0.968874	1.0,1.0	1.0,0.386	0.307
10133	ENSG00000136861	CDK5RAP2	chr9	-	123222849	123223025	123220727	123220900	123230137	123230275	10133	5,65	1,30	8,68	0,4	247	85	0.000988042	0.968874	0.632,0.427	1.0,0.854	-0.398
52319	ENSG00000142396	none_found	chr19	+	58823562	58823828	58817453	58817582	58826113	58826568	52319	651288	0,33	661038	5177	337	85	0.00104204	0.968874	1.0,0.908	0.769,0.597	0.271
11228	ENSG00000129351	ILF3	chr19	+	10798021	10798384	10794592	10794646	10799225	10799354	11228	1314470	0,40	852742	4129	396	47	0.00105916	0.968874	1.0,0.93	0.716,0.716	0.249
53333	ENSG00000215845	TSTD1	chr1	-	161008340	161008484	161007702	161007865	161008669	161008740	53333	48728	15280	37482	65305	194	64	0.00106495	0.968874	0.514,0.462	0.158,0.343	0.238
62525	ENSG00000176731	C8orf59	chr8	-	86131464	86131589	86129614	86129731	86132534	86132582	62525	28322	30210	20,96	53297	152	41	0.0010692	0.968874	0.201,0.293	0.092,0.08	0.161
32804	ENSG00000145439	CBR4	chr4	-	169927035	169927065	169922725	169923356	169927905	169928042	32804	4,20	8,57	0,7	20,69	46	85	0.00107688	0.968874	0.48,0.393	0.0,0.158	0.358
10130	ENSG00000136861	CDK5RAP2	chr9	-	123222849	123222945	123220727	123220900	123230137	123230275	10130	11109	1,30	20112	0,4	170	85	0.00109028	0.968874	0.846,0.645	1.0,0.933	-0.221
63436	ENSG00000036054	TBC1D23	chr3	+	100030676	100030721	100029246	100029386	100034942	100035031	63436	12,33	1,2	0,16	3,7	73	82	0.00114794	0.988364	0.931,0.949	0.0,0.72	0.58
37391	ENSG00000173821	RNF213	chr17	+	78252562	78252709	78247039	78247203	78261613	78262162	37391	3,18	15,72	17,41	16,40	218	85	0.00116214	0.988364	0.072,0.089	0.293,0.286	-0.209
44479	ENSG00000198911	SREBF2	chr22	+	42274662	42274762	42273945	42274127	42276719	42276996	44479	4175	501446	9218	31514	171	85	0.00121598	0.988364	0.038,0.057	0.126,0.174	-0.103
47529	ENSG00000106462	EZH2	chr7	-	148543588	148543690	148529725	148529842	148581255	148581370	47529	1,60	0,81	22,58	0,22	173	85	0.00122444	0.988364	1.0,0.267	1.0,0.564	-0.149
37299	ENSG00000188428	MUTED	chr6	-	8027439	8027632	8026599	8026658	8041371	8041501	37299	0,7	1,28	9,52	6,12	231	52	0.00124468	0.988364	0.0,0.053	0.252,0.494	-0.347
58195	ENSG00000155366	RHOC	chr1	-	113247721	113247790	113246265	113246428	113249699	113249736	58195	39413	3119	89357	32218	69	30	0.00130376	0.988364	0.85,0.601	0.547,0.416	0.244
52450	ENSG00000115935	WIPF1	chr2	-	175439931	175440099	175437051	175437174	175446037	175446167	52450	10362	0,0	23257	25,18	239	85	0.00132397	0.988364	1.0,1.0	0.247,0.835	0.459
39683	ENSG00000149503	INCENP	chr11	+	61908971	61908983	61908384	61908516	61912453	61912563	39683	2122	13150	0,53	9152	10	85	0.00134061	0.988364	0.567,0.874	0.0,0.748	0.346
201	ENSG00000124160	NCOA5	chr20	-	44708025	44708092	44698848	44699175	44718455	44718591	201	1,70	5,51	14,95	1,36	120	85	0.00134975	0.988364	0.124,0.493	0.908,0.651	-0.471
4976	ENSG00000197965	MPZL1	chr1	+	167742472	167742605	167734819	167734986	167757056	167757081	4976	3282	0,101	11245	0,22	137	18	0.00135659	0.988364	1.0,0.268	1.0,0.594	-0.163
48377	ENSG00000066427	ATXN3	chr14	-	92562436	92562478	92560089	92560175	92563017	92563182	48377	4,11	0,0	1,4	1,6	64	79	0.00136072	0.988364	1.0,1.0	0.552,0.451	0.498
30834	ENSG00000135426	KIAA0748	chr12	-	55375557	55375729	55368183	55368391	55378368	55378515	30834	10141	15557	20235	7323	243	85	0.00137391	0.988364	0.189,0.081	0.5,0.203	-0.217
16841	ENSG00000078674	PCM1	chr8	+	17840741	17840798	17838099	17838264	17842955	17843128	16841	0,16	8,40	0,33	1,20	100	85	0.00140568	0.995418	0.0,0.254	0.0,0.584	-0.165
44740	ENSG00000219481	NBPF1	chr1	-	16921425	16921508	16921086	16921156	16935002	16935145	44740	8,77	0,13	13,26	3,23	130	63	0.00150116	1	1.0,0.742	0.677,0.354	0.355
27113	ENSG00000008869	HEATR5B	chr2	-	37217790	37217942	37215788	37216002	37227728	37227956	27113	0,55	1,13	3,60	0,0	223	85	0.00156967	1	0.0,0.617	1.0,1.0	-0.692
49263	ENSG00000147443	DOK2	chr8	-	21769411	21769499	21768183	21768368	21769739	21770021	49263	9,99	2,34	29151	0,15	162	85	0.00161786	1	0.702,0.604	1.0,0.841	-0.267
16912	ENSG00000126773	C14orf135	chr14	+	60574303	60575045	60558636	60559137	60581417	60581597	16912	51811	3,43	41514	11,84	813	85	0.00162157	1	0.64,0.664	0.28,0.39	0.317
5328	ENSG00000187239	FNBP1	chr9	-	132678244	132678259	132671168	132671278	132686122	132686305	5328	1,21	5,88	4,6	0,12	16	85	0.00162762	1	0.515,0.559	1.0,0.726	-0.326
59833	ENSG00000125695	STRADA	chr17	-	61803997	61804055	61791365	61791468	61805693	61805773	59833	4,50	0,24	0,24	4,32	90	73	0.00175624	1	1.0,0.628	0.0,0.378	0.625
17054	ENSG00000183426	NPIP	chr16	+	15043906	15043967	15042786	15042894	15044076	15044112	17054	14785	0,0	8508	5,56	54	29	0.00176519	1	1.0,1.0	0.462,0.83	0.354
21738	ENSG00000118707	TGIF2,TGIF2-C20ORF24	chr20	+	35219312	35219412	35207229	35207369	35219907	35220326	21738	5170	0,0	0,76	3,9	171	85	0.00177647	1	1.0,1.0	0.0,0.808	0.596
17690	ENSG00000127081	ZNF484	chr9	-	95637296	95637341	95618473	95618600	95640171	95640290	17690	1,35	0,35	0,7	1,30	76	85	0.00182678	1	1.0,0.528	0.0,0.207	0.661
52318	ENSG00000142396	none_found	chr19	+	58823531	58823828	58817453	58817582	58826113	58827023	52318	882082	0,33	921726	5177	368	85	0.00187282	1	1.0,0.936	0.81,0.693	0.216
23183	ENSG00000119048	UBE2B	chr5	+	133712359	133712385	133710073	133710154	133724015	133724104	23183	3,37	2,30	6,42	0,10	24	71	0.00190467	1	0.816,0.785	1.0,0.926	-0.163
25917	ENSG00000143393	PI4KB	chr1	-	151297220	151297393	151288115	151288985	151299746	151299853	25917	4,65	11128	14,65	2,52	244	85	0.00194376	1	0.112,0.15	0.709,0.303	-0.375
53330	ENSG00000215845	TSTD1	chr1	-	161008340	161008463	161007702	161007865	161008669	161008780	53330	611219	15280	64845	65305	194	85	0.00200952	1	0.641,0.656	0.301,0.548	0.224
30627	ENSG00000129116	PALLD	chr4	+	169798873	169799545	169753191	169753322	169812072	169812208	30627	14911	0,24	18399	2,43	743	85	0.00205691	1	1.0,0.813	0.507,0.515	0.395
38961	ENSG00000156253	RWDD2B	chr21	-	30380081	30380444	30378079	30378972	30380715	30380942	38961	11,62	0,9	30169	0,1	434	85	0.00206595	1	1.0,0.574	1.0,0.971	-0.199
20142	ENSG00000198408	MGEA5	chr10	-	103553669	103553755	103552595	103552700	103557736	103557911	20142	15127	15,56	14139	7,18	158	85	0.00217289	1	0.35,0.55	0.518,0.806	-0.212
50328	ENSG00000144199	FAHD2B	chr2	-	97757599	97757725	97757198	97757449	97760437	97760576	50328	6168	0,48	4118	7,85	197	85	0.0021899	1	1.0,0.602	0.198,0.375	0.515
16903	ENSG00000144161	ZC3H8	chr2	-	112997944	112998069	112995891	112996105	113007767	113007849	16903	0,0	6,35	1,9	1,16	186	75	0.0021969	1	0.0,0.0	0.287,0.185	-0.236
57758	ENSG00000145216	FIP1L1	chr4	+	54280781	54280889	54265896	54266006	54292038	54292132	57758	22273	17238	52336	22130	179	85	0.00223357	1	0.381,0.353	0.529,0.551	-0.173
18204	ENSG00000120370	GORAB	chr1	+	170505450	170505562	170501291	170501425	170508350	170508708	18204	3,23	6,35	4,36	0,13	183	85	0.0022756	1	0.188,0.234	1.0,0.563	-0.571
21522	ENSG00000060339	CCAR1	chr10	+	70516282	70516389	70515232	70515293	70517050	70517134	21522	1,16	6,25	12,49	2,20	139	46	0.00237222	1	0.052,0.175	0.665,0.448	-0.443
62034	ENSG00000070081	none_found	chr11	+	17358894	17359081	17352448	17352530	17370891	17371509	62034	8,43	1,16	11,37	8,62	248	75	0.00242342	1	0.708,0.448	0.294,0.153	0.355
11072	ENSG00000179526	SHARPIN	chr8	-	145153983	145154108	145153535	145153897	145154179	145154225	11072	89439	3,24	261467	49,64	150	39	0.00245158	1	0.885,0.826	0.581,0.655	0.237
61159	ENSG00000090060	PAPOLA	chr14	+	97026985	97027048	97022511	97022750	97029155	97029230	61159	16,96	0,15	4,46	0,28	95	68	0.00248836	1	1.0,0.821	1.0,0.54	0.14
52568	ENSG00000084234	APLP2	chr11	+	129993506	129993674	129992199	129992408	129996594	129996725	52568	28486	7,66	12310	14,99	239	85	0.00258837	1	0.587,0.724	0.234,0.527	0.275
36572	ENSG00000144136	SLC20A1	chr2	+	113410465	113410524	113410278	113410375	113414698	113414818	36572	3,36	1,58	0,17	12,63	104	85	0.00265075	1	0.71,0.337	0.0,0.181	0.433
36622	ENSG00000243209	none_found	chrY	+	21757900	21758020	21755284	21755479	21759476	21759551	36622	2,55	0,4	2,23	0,16	174	68	0.00266825	1	1.0,0.843	1.0,0.36	0.242
60552	ENSG00000071889	FAM3A	chrX	-	153736141	153736192	153735736	153735821	153736619	153736678	60552	5,60	5,7	31,54	1,1	48	45	0.0026984	1	0.484,0.889	0.967,0.981	-0.288
62271	ENSG00000198477	ZNF280B	chr22	-	22862127	22862188	22848381	22848499	22862976	22863472	62271	6,43	0,0	1,21	0,7	108	85	0.00275228	1	1.0,1.0	1.0,0.702	0.149
55753	ENSG00000112290	WASF1	chr6	-	110481837	110481935	110448671	110448832	110500641	110500873	55753	4,57	2,49	2,27	8,73	170	85	0.00282142	1	0.5,0.368	0.111,0.156	0.301
56451	ENSG00000132780	NASP	chr1	+	46072992	46074009	46072153	46072263	46078840	46078920	56451	1183600	8306	871499	16403	1076	73	0.00287166	1	0.5,0.444	0.269,0.202	0.236
2138	ENSG00000165113	GKAP1	chr9	-	86403515	86403593	86399629	86399753	86414099	86414243	2138	11100	0,0	4,65	12,0	142	85	0.00303967	1	1.0,1.0	0.166,1.0	0.417
60154	ENSG00000077721	UBE2A	chrX	+	118715469	118715559	118709337	118709363	118716550	118716639	60154	2193	1,19	13242	0,0	97	16	0.00309667	1	0.248,0.626	1.0,1.0	-0.563
58883	ENSG00000197818	SLC9A8	chr20	+	48467346	48467381	48466115	48466217	48471974	48472118	58883	0,9	6,38	3,17	6,20	56	85	0.00313707	1	0.0,0.264	0.431,0.563	-0.365
43944	ENSG00000143569	UBAP2L	chr1	+	154241837	154241888	154241235	154241430	154242675	154242759	43944	0,24	8180	5,49	13,55	80	77	0.00314067	1	0.0,0.114	0.27,0.462	-0.309
53123	ENSG00000205560	CPT1B	chr22	-	51012236	51012350	51011948	51012144	51012763	51012848	53123	2210	6188	10194	4,75	178	78	0.0031976	1	0.127,0.329	0.523,0.531	-0.299
5997	ENSG00000124588	NQO2	chr6	+	3002283	3002520	3000207	3000319	3006701	3006793	5997	3,30	7126	14107	12,78	308	85	0.00323453	1	0.106,0.062	0.244,0.275	-0.176
30110	ENSG00000167302	C17orf56	chr17	-	79206114	79206318	79205646	79205821	79207231	79207303	30110	2136	3,26	11171	0,8	255	65	0.00326068	1	0.145,0.571	1.0,0.845	-0.565
22964	ENSG00000068745	IP6K2	chr3	-	48732126	48732257	48730920	48731673	48732522	48732851	22964	2,87	0,18	6,62	5,71	202	85	0.00326122	1	1.0,0.67	0.336,0.269	0.533
62522	ENSG00000176731	C8orf59	chr8	-	86131464	86131592	86129614	86129731	86132534	86132650	62522	30403	30210	24116	53297	199	85	0.00335676	1	0.299,0.45	0.162,0.143	0.222
49582	ENSG00000116731	PRDM2	chr1	+	14095612	14095668	14075855	14075982	14099572	14099683	49582	0,2	11125	5,6	1,98	98	85	0.00342119	1	0.0,0.014	0.813,0.05	-0.425
54141	ENSG00000204623	none_found	chr6	-	30024867	30025494	30003206	30003760	30025891	30025967	54141	1,49	2,34	3148	0,20	682	69	0.00364139	1	0.048,0.127	1.0,0.428	-0.627
33712	ENSG00000060237	WNK1	chr12	+	980430	980514	971339	971436	987377	987527	33712	4162	6125	3117	1,35	154	85	0.00376688	1	0.269,0.417	0.623,0.649	-0.293
21858	ENSG00000151276	MAGI1	chr3	-	65361419	65361623	65350527	65350621	65364935	65365229	21858	5,57	0,20	7,64	0,2	275	85	0.0038404	1	1.0,0.468	1.0,0.908	-0.22
16355	ENSG00000119866	BCL11A	chr2	-	60687816	60688879	60679634	60679801	60689416	60689559	16355	671384	2104	1911849	3,48	1134	85	0.00386517	1	0.715,0.499	0.827,0.743	-0.178
12266	ENSG00000197323	TRIM33	chr1	-	114940561	114940612	114940229	114940482	114942078	114942231	12266	16102	5,29	21,45	15,35	88	85	0.0038989	1	0.756,0.773	0.575,0.554	0.2
11455	ENSG00000107643	none_found	chr10	+	49533939	49534008	49514697	49514864	49609654	49609825	11455	0,10	3,54	6,15	0,25	124	85	0.00395684	1	0.0,0.113	1.0,0.291	-0.589
39663	ENSG00000143776	CDC42BPA	chr1	-	227239581	227239686	227235627	227235711	227257477	227257554	39663	1,3	5,8	2,10	0,1	153	62	0.00403663	1	0.075,0.132	1.0,0.802	-0.798
54333	ENSG00000127314	RAP1B	chr12	+	69018454	69018653	69004687	69004832	69042478	69042561	54333	11,64	5107	2,28	7180	261	76	0.00404199	1	0.39,0.148	0.077,0.043	0.209
40154	ENSG00000228794	none_found	chr1	+	783033	783186	763052	763155	787306	787490	40154	2,29	0,8	11,44	0,0	224	85	0.00404661	1	1.0,0.579	1.0,1.0	-0.211
14378	ENSG00000089818	NECAP1	chr12	+	8244364	8244446	8242790	8242895	8245271	8245380	14378	9103	3,47	13,94	0,14	150	85	0.00404695	1	0.63,0.554	1.0,0.792	-0.304
6462	ENSG00000154889	MPPE1	chr18	-	11884877	11885042	11883688	11884626	11885674	11885815	6462	2115	2125	6177	0,60	236	85	0.0041097	1	0.265,0.249	1.0,0.515	-0.501
24722	ENSG00000125944	HNRNPR	chr1	-	23667344	23667510	23664762	23665101	23670703	23670810	24722	18595	12379	37790	11147	237	85	0.00428204	1	0.35,0.36	0.547,0.658	-0.248
29276	ENSG00000163939	PBRM1	chr3	-	52718871	52718930	52713649	52713742	52719764	52719810	29276	0,3	5128	6,13	1,71	58	39	0.0043482	1	0.0,0.016	0.801,0.11	-0.448
5333	ENSG00000187239	FNBP1	chr9	-	132686122	132686218	132671168	132671278	132687238	132687436	5333	5,88	37352	0,14	97267	170	85	0.00435443	1	0.063,0.111	0.0,0.026	0.074
8139	ENSG00000254782	PCBP4	chr3	-	51995956	51996104	51995227	51995320	52007980	52008047	8139	4,44	0,17	21,86	0,6	194	60	0.00435491	1	1.0,0.445	1.0,0.816	-0.185
23897	ENSG00000160201	U2AF1	chr21	-	44521475	44521542	44520562	44520629	44524424	44524586	23897	18199	28374	19266	19216	95	60	0.00447114	1	0.289,0.252	0.387,0.437	-0.142
53279	ENSG00000140511	HAPLN3	chr15	-	89422648	89423841	89422197	89422500	89424587	89424956	53279	8555	0,29	8185	2,49	1264	85	0.00453474	1	1.0,0.563	0.212,0.202	0.575
24097	ENSG00000181381	DDX60L	chr4	-	169298878	169298994	169296527	169296675	169299504	169299626	24097	0,2	1,4	2,13	0,0	187	85	0.00455426	1	0.0,0.185	1.0,1.0	-0.908
41786	ENSG00000069424	KCNAB2	chr1	+	6101890	6101932	6100576	6100705	6132814	6132858	41786	1,72	16602	11121	31388	35	37	0.00465336	1	0.062,0.112	0.273,0.248	-0.174
10710	ENSG00000130985	UBA1	chrX	+	47057565	47057754	47053235	47053423	47058201	47058318	10710	1156	232301	23294	271237	260	85	0.00465604	1	0.014,0.022	0.218,0.072	-0.127
24723	ENSG00000125944	HNRNPR	chr1	-	23667344	23667513	23664982	23665101	23670703	23670815	24723	15474	12379	31646	11147	240	85	0.00469684	1	0.307,0.307	0.5,0.609	-0.248
13698	ENSG00000062194	GPBP1	chr5	+	56532939	56532999	56531792	56531859	56542126	56542311	13698	1,31	17116	4,29	3,47	81	60	0.00471582	1	0.042,0.165	0.497,0.314	-0.302
28037	ENSG00000163608	C3orf17	chr3	-	112736294	112736449	112732795	112732879	112738388	112738491	28037	13243	3,56	31213	2,15	218	77	0.00471613	1	0.605,0.605	0.846,0.834	-0.235
16047	ENSG00000178950	GAK	chr4	-	853149	853281	845537	845762	853393	853510	16047	3170	15208	1,69	27225	203	85	0.00479435	1	0.077,0.255	0.015,0.114	0.102
3347	ENSG00000109534	GAR1	chr4	+	110737308	110737534	110736983	110737161	110739091	110739246	3347	11219	0,0	2,49	0,15	297	85	0.00483724	1	1.0,1.0	1.0,0.483	0.258
23000	ENSG00000169764	UGP2	chr2	+	64089974	64090062	64084962	64085070	64109599	64109741	23000	0,3	11,77	14,2	6,35	162	85	0.00484961	1	0.0,0.02	0.55,0.029	-0.28
34885	ENSG00000196776	CD47	chr3	-	107770785	107770817	107762145	107766139	107776323	107776416	34885	44257	9120	69217	47149	50	85	0.00488223	1	0.893,0.785	0.714,0.712	0.126
56670	ENSG00000164751	PEX2	chr8	-	77898422	77898532	77896405	77896431	77912225	77912503	56670	25318	0,11	5221	1,32	115	19	0.00492401	1	1.0,0.827	0.452,0.533	0.421
54583	ENSG00000251369	none_found	chr19	-	58055604	58055951	58053207	58054611	58057824	58059361	54583	4,83	0,0	1,58	0,9	418	85	0.00494009	1	1.0,1.0	1.0,0.567	0.217
2558	ENSG00000122882	ECD	chr10	-	74923490	74923708	74920191	74920309	74927623	74927853	2558	5152	0,61	13188	0,21	289	85	0.00496851	1	1.0,0.423	1.0,0.725	-0.151
59944	ENSG00000197771	MCMBP	chr10	-	121595051	121595216	121591523	121591612	121596407	121596541	59944	16417	3,46	23425	0,10	233	82	0.00497706	1	0.652,0.761	1.0,0.937	-0.262
46266	ENSG00000196182	STK40	chr1	-	36833452	36833685	36826821	36826941	36851323	36851480	46266	12351	12192	57481	9150	304	85	0.00502936	1	0.219,0.338	0.639,0.473	-0.278
54352	ENSG00000127314	RAP1B	chr12	+	69018450	69018653	69004717	69004832	69042478	69042561	54352	11,65	5107	2,30	7180	265	76	0.00503189	1	0.387,0.148	0.076,0.046	0.207
1428	ENSG00000102908	NFAT5	chr16	+	69602397	69602451	69598996	69600277	69660305	69660431	1428	2,18	2,39	4,12	0,6	94	85	0.00505302	1	0.475,0.294	1.0,0.644	-0.438
20312	ENSG00000076864	RAP1GAP	chr1	-	21995003	21995086	21952796	21952890	21995746	21995776	20312	2,38	0,43	6,42	0,2	90	23	0.00505697	1	1.0,0.184	1.0,0.843	-0.33
54259	ENSG00000140153	WDR20	chr14	+	102661274	102661457	102606229	102606509	102674939	102675189	54259	2,71	0,27	8,86	0,7	254	85	0.00508945	1	1.0,0.468	1.0,0.804	-0.168
23060	ENSG00000081237	PTPRC	chr1	+	198665840	198666038	198661475	198661502	198668692	198668833	23060	51601	7234	911564	4100	204	20	0.00510942	1	0.417,0.201	0.69,0.605	-0.338
27074	ENSG00000213420	GPC2	chr7	-	99773194	99773517	99771080	99772388	99773829	99773988	27074	18380	11,97	6,81	8,73	394	85	0.0054241	1	0.261,0.458	0.139,0.193	0.194
4520	ENSG00000133226	SRRM1	chr1	+	24989673	24989715	24989150	24989295	24993305	24993416	4520	21180	6124	15,83	16,96	70	85	0.00552826	1	0.81,0.638	0.532,0.512	0.202
46271	ENSG00000196182	STK40	chr1	-	36833448	36833685	36826821	36826941	36851323	36851485	46271	10318	12192	47451	9150	308	85	0.00555376	1	0.187,0.314	0.59,0.453	-0.271
51601	ENSG00000211460	TSN	chr2	+	122518984	122519100	122513108	122513421	122520580	122520660	51601	24189	1,31	59163	0,5	175	73	0.00557144	1	0.909,0.718	1.0,0.932	-0.152
13897	ENSG00000137720	C11orf1	chr11	+	111753859	111753926	111753091	111753322	111754494	111754624	13897	12118	1,37	17112	0,4	120	85	0.00557669	1	0.895,0.693	1.0,0.952	-0.182
65015	ENSG00000160953	MUM1	chr19	+	1371232	1371389	1370640	1371077	1373070	1373159	65015	3,85	4114	2,35	18137	225	82	0.00563078	1	0.215,0.214	0.039,0.085	0.153
25932	ENSG00000114200	BCHE	chr3	-	165547304	165548829	165503932	165504099	165555101	165555250	25932	59639	3,45	47603	0,10	1596	85	0.00563771	1	0.512,0.431	1.0,0.763	-0.41
548	ENSG00000133612	AGAP3	chr7	+	150817606	150817832	150817073	150817232	150820880	150820937	548	0,11	2,88	4,46	3,54	262	50	0.00564844	1	0.0,0.023	0.203,0.14	-0.16
34688	ENSG00000149554	CHEK1	chr11	+	125507343	125507439	125505323	125505428	125513686	125513795	34688	10,64	2,8	16105	0,0	170	85	0.00576291	1	0.714,0.8	1.0,1.0	-0.243
29220	ENSG00000163964	PIGX	chr3	+	196453525	196453642	196449285	196449427	196454793	196454908	29220	4,42	13,47	0,11	28,38	188	85	0.00579992	1	0.122,0.288	0.0,0.116	0.147
45813	ENSG00000114796	KLHL24	chr3	+	183354008	183354099	183353410	183353535	183368083	183368363	45813	4,21	2,14	1,20	0,0	168	85	0.00580299	1	0.503,0.431	1.0,1.0	-0.533
4565	ENSG00000006194	ZNF263	chr16	+	3338453	3338570	3333447	3334205	3339392	3341460	4565	3,84	2,96	4,99	1,42	188	85	0.00581879	1	0.404,0.283	0.644,0.516	-0.237
32533	ENSG00000173517	PEAK1	chr15	-	77657504	77657567	77578764	77578846	77712347	77712464	32533	2,38	1,51	8,28	0,12	102	75	0.00584603	1	0.595,0.354	1.0,0.632	-0.342
14862	ENSG00000198218	QRICH1	chr3	-	49129829	49129889	49114141	49114471	49131344	49131484	14862	3,35	9228	3,48	3108	106	85	0.00584782	1	0.211,0.11	0.445,0.263	-0.193
9083	ENSG00000075151	EIF4G3	chr1	-	21327691	21327805	21307540	21307720	21329205	21329301	9083	3,46	7118	6,56	3,52	185	85	0.00595544	1	0.165,0.152	0.479,0.331	-0.247
58194	ENSG00000155366	RHOC	chr1	-	113247721	113247823	113246265	113246428	113249699	113249724	58194	40388	3119	77331	32218	106	18	0.00600133	1	0.694,0.356	0.29,0.205	0.277
44996	ENSG00000128699	ORMDL1	chr2	-	190647739	190647849	190647147	190647328	190648994	190649097	44996	7,70	6423	12240	3196	181	85	0.00607072	1	0.354,0.072	0.653,0.365	-0.296
64693	ENSG00000151135	C12orf23	chr12	+	107350859	107350927	107349621	107349843	107360888	107360958	64693	6134	2,79	2,77	5101	100	63	0.00607644	1	0.654,0.517	0.201,0.324	0.323
28312	ENSG00000165568	AKR1E2	chr10	+	4881920	4882018	4877866	4878001	4884612	4884696	28312	3,4	0,6	1,0	9,11	162	77	0.00612811	1	1.0,0.241	0.05,0.0	0.596
13355	ENSG00000111832	RWDD1	chr6	+	116895220	116895334	116892651	116892818	116901457	116901523	13355	4161	7301	11221	10156	159	59	0.00626487	1	0.175,0.166	0.29,0.345	-0.147
61917	ENSG00000135837	CEP350	chr1	+	179972308	179972422	179965687	179966310	179981063	179981210	61917	3,58	0,21	4,42	0,1	185	85	0.00635979	1	1.0,0.559	1.0,0.951	-0.196
21859	ENSG00000151276	MAGI1	chr3	-	65361419	65361620	65350527	65350621	65364935	65365229	21859	4,65	0,20	8,61	0,2	272	85	0.00637841	1	1.0,0.504	1.0,0.905	-0.201
4619	ENSG00000148516	ZEB1	chr10	+	31661946	31662102	31608144	31608221	31676052	31676195	4619	10,21	2,17	3,1	7,10	212	70	0.00639211	1	0.623,0.29	0.124,0.032	0.379
35322	ENSG00000087088	BAX	chr19	+	49458943	49459090	49458136	49458219	49459454	49459590	35322	20372	8,67	46529	10,32	209	76	0.00641154	1	0.476,0.669	0.626,0.857	-0.169
22126	ENSG00000119397	CNTRL	chr9	+	123920017	123920158	123919747	123919878	123921132	123921297	22126	16195	0,27	4109	3,37	212	85	0.00644874	1	1.0,0.743	0.348,0.542	0.426
11618	ENSG00000130731	C16orf13	chr16	-	685611	685774	684718	684797	686093	686347	11618	78405	0,5	186434	17,27	221	72	0.00646913	1	1.0,0.963	0.781,0.84	0.171
62907	ENSG00000114098	ARMC8	chr3	+	137907296	137907372	137906108	137906441	137928658	137928735	62907	3,79	1,46	2,25	3,43	123	70	0.00651463	1	0.631,0.494	0.275,0.249	0.301
54223	ENSG00000181852	RNF41	chr12	-	56606779	56606922	56604080	56604352	56607741	56607854	54223	0,19	5201	6,66	3175	214	85	0.00653008	1	0.0,0.036	0.443,0.13	-0.268
16820	ENSG00000173209	AHSA2	chr2	+	61410681	61410797	61408454	61408540	61411846	61411935	16820	9143	27398	31206	36265	178	76	0.0065463	1	0.125,0.133	0.269,0.249	-0.13
44472	ENSG00000198911	SREBF2	chr22	+	42296023	42296126	42294652	42294785	42296333	42296502	44472	5117	531268	6227	23459	174	85	0.00660021	1	0.044,0.043	0.113,0.195	-0.111
6130	ENSG00000224078	none_found	chr15	+	25298412	25298510	25296235	25296383	25298974	25299114	6130	0,7	5,43	1,34	6,37	170	85	0.00670065	1	0.0,0.075	0.077,0.315	-0.159
58079	ENSG00000129317	PUS7L	chr12	-	44132112	44132194	44130183	44130464	44136259	44136358	58079	10,39	4,4	35,40	0,0	150	85	0.00681602	1	0.586,0.847	1.0,1.0	-0.284
27244	ENSG00000169221	TBC1D10B	chr16	-	30371047	30371162	30369983	30370138	30380548	30381585	27244	4,96	0,25	11,70	0,0	186	85	0.00685301	1	1.0,0.637	1.0,1.0	-0.182
11624	ENSG00000130731	C16orf13	chr16	-	684888	684956	684718	684797	686093	686347	11624	44155	0,5	159161	17,27	109	72	0.00688382	1	1.0,0.953	0.861,0.798	0.147
27508	ENSG00000183495	EP400	chr12	+	132466033	132466141	132464238	132464338	132466637	132467023	27508	9,87	4,86	20124	4,50	179	85	0.00694246	1	0.517,0.324	0.704,0.541	-0.202
44396	ENSG00000176974	SHMT1	chr17	-	18238872	18238989	18233868	18233985	18243356	18243569	44396	1,60	0,14	2134	0,5	188	85	0.0070188	1	1.0,0.66	1.0,0.924	-0.132
5806	ENSG00000134759	ELP2	chr18	+	33718757	33718835	33718232	33718389	33721099	33721164	5806	20114	0,4	10,60	0,19	115	58	0.00703254	1	1.0,0.935	1.0,0.614	0.161
34774	ENSG00000086289	EPDR1	chr7	+	37988441	37988650	37960162	37960810	37989801	37990407	34774	9203	0,42	23238	0,14	280	85	0.00705446	1	1.0,0.595	1.0,0.838	-0.122
15383	ENSG00000185404	SP140L	chr2	+	231193471	231193546	231191984	231192016	231222519	231222682	15383	5263	8258	15215	2108	76	25	0.00706859	1	0.171,0.251	0.712,0.396	-0.343
18810	ENSG00000006576	PHTF2	chr7	+	77567026	77567155	77558425	77558644	77569346	77569619	18810	29134	0,12	16,77	9,10	200	85	0.00712085	1	1.0,0.826	0.43,0.766	0.315
20765	ENSG00000101452	DHX35	chr20	+	37601201	37601294	37597723	37597857	37612341	37612419	20765	1,66	0,22	3,68	0,4	156	71	0.00713274	1	1.0,0.577	1.0,0.886	-0.155
40826	ENSG00000151876	FBXO4	chr5	+	41927114	41927350	41925355	41925600	41929798	41930019	40826	10,28	1,24	15,41	0,6	307	85	0.00725851	1	0.735,0.244	1.0,0.654	-0.337
23525	ENSG00000134909	ARHGAP32	chr11	-	128993782	128993824	128993340	128993425	128994697	128994789	23525	0,5	2,11	6,5	0,3	63	78	0.00729802	1	0.0,0.36	1.0,0.674	-0.657
4625	ENSG00000148516	ZEB1	chr10	+	31662050	31662102	31608140	31608221	31676052	31676198	4625	8,8	2,17	3,0	7,10	79	74	0.00741617	1	0.789,0.306	0.286,0.0	0.404
46426	ENSG00000162885	B3GALNT2	chr1	-	235634163	235634274	235618870	235618996	235643369	235643465	46426	9122	2,17	12,66	0,0	182	85	0.00742795	1	0.678,0.77	1.0,1.0	-0.276
52447	ENSG00000115935	WIPF1	chr2	-	175439931	175440108	175436403	175437174	175446037	175446167	52447	10532	0,0	25383	25,18	248	85	0.0074389	1	1.0,1.0	0.255,0.879	0.433
6221	ENSG00000198586	TLK1	chr2	-	171938149	171938218	171917590	171917666	171939290	171939362	6221	0,10	8,56	13,12	8,24	88	49	0.00754435	1	0.0,0.09	0.475,0.218	-0.302
55759	ENSG00000112290	WASF1	chr6	-	110499800	110499945	110481837	110481935	110500641	110500852	55759	2,47	1,20	7,53	1,4	216	85	0.0075488	1	0.44,0.48	0.734,0.839	-0.327
53013	ENSG00000136891	TEX10	chr9	-	103072580	103072661	103065913	103066124	103082546	103082680	53013	0,38	2,13	1,38	1,1	148	85	0.00755748	1	0.0,0.627	0.365,0.956	-0.347
42182	ENSG00000197622	CDC42SE1	chr1	-	151029126	151029262	151028152	151028469	151031954	151032125	42182	4131	34832	25405	87740	207	85	0.00758184	1	0.046,0.061	0.106,0.183	-0.091
43472	ENSG00000095485	CWF19L1	chr10	-	102021735	102021820	102016018	102016233	102027327	102027424	43472	1,22	1,8	1,30	0,0	156	85	0.00767555	1	0.353,0.6	1.0,1.0	-0.524
974	ENSG00000173230	GOLGB1	chr3	-	121438492	121438615	121437234	121437348	121441108	121441225	974	2,70	0,47	6,62	0,12	194	85	0.0077	1	1.0,0.395	1.0,0.694	-0.149
18969	ENSG00000167272	POP5	chr12	-	121017576	121017726	121017316	121017400	121018917	121019139	18969	17372	1,41	63625	0,19	213	77	0.0077211	1	0.86,0.766	1.0,0.922	-0.148
42210	ENSG00000197555	SIPA1L1	chr14	+	72043251	72043304	71996028	71996087	72054287	72054482	42210	0,0	7,34	0,4	2,9	59	52	0.00785704	1	0.0,0.0	0.0,0.281	-0.141
29467	ENSG00000172995	ARPP21	chr3	+	35779705	35779810	35778669	35778854	35780808	35781069	29467	14618	0,21	26627	4,86	176	85	0.00788275	1	1.0,0.934	0.758,0.779	0.199
62662	ENSG00000072310	SREBF1	chr17	-	17720861	17720905	17720569	17720771	17721009	17721230	62662	5241	13764	2104	43633	74	85	0.00789655	1	0.306,0.266	0.051,0.159	0.181
231	ENSG00000099875	MKNK2	chr19	-	2046365	2046467	2043501	2043581	2050799	2050852	231	2,34	0,9	5,44	0,0	122	34	0.00790707	1	1.0,0.513	1.0,1.0	-0.244
55751	ENSG00000112290	WASF1	chr6	-	110481837	110481935	110448671	110448832	110499800	110499945	55751	3,53	0,3	1,39	4,13	170	85	0.00790919	1	1.0,0.898	0.111,0.6	0.594
11421	ENSG00000119950	MXI1	chr10	+	112004585	112004615	111987946	111988079	112038937	112039052	11421	0,22	3,23	5,27	0,17	46	85	0.00792376	1	0.0,0.639	1.0,0.746	-0.554
37049	ENSG00000175634	RPS6KB2	chr11	+	67199826	67199963	67198838	67198986	67200070	67200128	37049	11,56	38105	2,21	69112	174	51	0.00800178	1	0.078,0.135	0.008,0.052	0.077
35324	ENSG00000087088	BAX	chr19	+	49458804	49458856	49458185	49458219	49459454	49459590	35324	6,74	8,67	14,91	10,32	45	27	0.00800821	1	0.31,0.399	0.457,0.63	-0.189
1503	ENSG00000014641	MDH1	chr2	+	63821621	63821720	63815742	63816180	63824532	63824708	1503	11779	3122	38699	1,39	170	85	0.00801352	1	0.647,0.761	0.95,0.9	-0.221
64960	ENSG00000196923	PDLIM7	chr5	-	176918404	176918421	176918010	176918147	176919405	176919436	64960	0,2	1,3	2,10	0,1	10	24	0.00803024	1	0.0,0.615	1.0,0.96	-0.673
43302	ENSG00000135912	TTLL4	chr2	+	219591991	219592070	219575597	219575760	219602301	219603886	43302	1116	1,31	6,86	0,5	144	85	0.00823926	1	0.371,0.688	1.0,0.91	-0.426
64576	ENSG00000129292	PHF20L1	chr8	+	133837279	133837402	133836248	133836305	133837508	133837582	64576	3,35	5,29	2,7	18,38	141	32	0.00825891	1	0.12,0.215	0.025,0.04	0.135
15302	ENSG00000112983	BRD8	chr5	-	137495243	137495288	137492603	137492956	137495757	137495862	15302	8126	13156	15,80	44189	76	85	0.00826099	1	0.408,0.475	0.276,0.321	0.143
12903	ENSG00000103121	C16orf61	chr16	-	81015410	81015482	81009698	81010076	81040338	81040719	12903	6,25	0,51	10,25	0,12	130	85	0.00839135	1	1.0,0.243	1.0,0.577	-0.167
13491	ENSG00000136856	SLC2A8	chr9	+	130164835	130165032	130162185	130162285	130165938	130166082	13491	4129	0,28	0,93	5,48	268	85	0.00855267	1	1.0,0.594	0.0,0.381	0.606
62523	ENSG00000176731	C8orf59	chr8	-	86127149	86127266	86126790	86126860	86129614	86129731	62523	89235	2,10	138203	9,37	166	63	0.00875324	1	0.944,0.899	0.853,0.676	0.157
686	ENSG00000165304	MELK	chr9	+	36597218	36597287	36589532	36589649	36599390	36599483	686	6180	1,71	5133	0,14	124	85	0.00875871	1	0.804,0.635	1.0,0.867	-0.214
6596	ENSG00000136758	YME1L1	chr10	-	27434356	27434519	27423759	27423910	27437834	27437969	6596	34219	2,24	30172	0,2	234	85	0.0089067	1	0.861,0.768	1.0,0.969	-0.17
61464	ENSG00000093000	NUP50	chr22	+	45566868	45567058	45564048	45564127	45567480	45567564	61464	30320	15195	74496	19,59	240	64	0.00894562	1	0.348,0.304	0.509,0.692	-0.275
34667	ENSG00000214021	TTLL3,ARPC4-TTLL3	chr3	+	9876110	9876187	9874787	9874929	9876364	9877088	34667	6117	11256	16122	11131	140	85	0.00898413	1	0.249,0.217	0.469,0.361	-0.182
45036	ENSG00000064115	TM7SF3	chr12	-	27128428	27128591	27126127	27127160	27148169	27148201	45036	53763	1,52	57659	0,10	174	25	0.00899834	1	0.884,0.678	1.0,0.904	-0.171
28579	ENSG00000112992	NNT	chr5	+	43624133	43624222	43603304	43603396	43628301	43628489	28579	5,85	0,15	9,61	0,0	164	85	0.00923903	1	1.0,0.746	1.0,1.0	-0.127
53974	ENSG00000120742	none_found	chr3	-	150284687	150284893	150264576	150264859	150320730	150320957	53974	2,38	0,6	13,63	0,0	277	85	0.00932719	1	1.0,0.66	1.0,1.0	-0.17
20822	ENSG00000114416	FXR1	chr3	+	180693100	180693192	180687945	180688146	180693909	180694070	20822	60420	33378	28256	50331	170	85	0.0096554	1	0.476,0.357	0.219,0.279	0.167
1156	ENSG00000101294	HM13	chr20	+	30155880	30156027	30154012	30154098	30156922	30157370	1156	25111	107273	57198	141199	212	79	0.00968858	1	0.08,0.132	0.131,0.27	-0.095
37648	ENSG00000197381	ADARB1	chr21	+	46554629	46554747	46548316	46548488	46591524	46591599	37648	8,27	6,31	18,41	6,12	172	68	0.00977851	1	0.345,0.256	0.543,0.575	-0.258
52141	ENSG00000230798	none_found	chr1	-	63787335	63787751	63787037	63787134	63787986	63788107	52141	6,74	1,7	1,56	5,22	487	85	0.0098827	1	0.512,0.649	0.034,0.308	0.41
49262	ENSG00000147443	DOK2	chr8	-	21769411	21769499	21768183	21768368	21771049	21771371	49262	8,65	2,45	10106	1,17	162	85	0.00993669	1	0.677,0.431	0.84,0.766	-0.249
62337	ENSG00000128309	MPST	chr22	+	37419792	37419968	37415808	37415913	37420232	37420851	62337	14,41	5118	7,44	28227	247	85	0.00996127	1	0.491,0.107	0.079,0.063	0.228
52487	ENSG00000204104	TRAF3IP1	chr2	+	239241464	239241536	239237566	239237983	239242600	239242676	52487	4,26	0,2	0,36	4,13	114	69	0.0100433	1	1.0,0.887	0.0,0.626	0.631
30976	ENSG00000115486	GGCX	chr2	-	85787937	85788108	85780354	85780620	85788508	85788596	30976	7,81	0,10	11,97	0,0	238	81	0.0100718	1	1.0,0.734	1.0,1.0	-0.133
51202	ENSG00000121621	KIF18A	chr11	-	28112163	28112274	28110070	28110268	28112955	28113060	51202	2,59	0,22	3,47	0,0	182	85	0.0100993	1	1.0,0.556	1.0,1.0	-0.222
42834	ENSG00000104774	MAN2B1	chr19	-	12769241	12769321	12769037	12769158	12772073	12772190	42834	14185	3,33	27181	0,10	146	85	0.0101065	1	0.731,0.765	1.0,0.913	-0.209
30065	ENSG00000118513	MYB	chr6	+	135517863	135518046	135516885	135517140	135518098	135518461	30065	3,29	4,1	0,17	3,10	254	85	0.01033	1	0.201,0.907	0.0,0.363	0.373
32376	ENSG00000115875	SRSF7	chr2	-	38973285	38973321	38970742	38972329	38973835	38973889	32376	11,65	0,1	18,52	7,12	29	47	0.0104695	1	1.0,0.991	0.806,0.875	0.155
55744	ENSG00000164077	MON1A	chr3	-	49948958	49949444	49947551	49948317	49950652	49950792	55744	26453	6,20	76513	1,8	557	85	0.010561	1	0.398,0.776	0.921,0.907	-0.327
35266	ENSG00000166046	TCP11L2	chr12	+	106697870	106698009	106696610	106696719	106704818	106705010	35266	1,22	0,29	0,7	6,40	210	85	0.010599	1	1.0,0.235	0.0,0.066	0.584
60429	ENSG00000134138	MEIS2	chr15	-	37186917	37187013	37183456	37184660	37187351	37187462	60429	1,38	2,23	7,36	0,6	170	85	0.0106885	1	0.2,0.452	1.0,0.75	-0.549
10206	ENSG00000101150	TPD52L2	chr20	+	62507168	62507228	62505020	62505169	62514071	62514173	10206	14197	3108	10148	6152	106	85	0.0107323	1	0.789,0.594	0.572,0.438	0.187
35320	ENSG00000087088	BAX	chr19	+	49458804	49459090	49458153	49458219	49459454	49459590	35320	27412	8,67	51571	10,32	331	59	0.0109726	1	0.376,0.523	0.476,0.761	-0.169
60549	ENSG00000071889	FAM3A	chrX	-	153736141	153736213	153735736	153735821	153736619	153736678	60549	8,52	5,7	28,45	1,1	90	45	0.0109953	1	0.444,0.788	0.933,0.957	-0.329
34538	ENSG00000189180	ZNF33A	chr10	+	38343302	38343439	38306218	38306314	38353015	38354023	34538	10,95	0,2	5,38	0,8	208	85	0.0110179	1	1.0,0.951	1.0,0.66	0.145
12246	ENSG00000104093	DMXL2	chr15	-	51745746	51745838	51742391	51742543	51747347	51747425	12246	2,46	0,9	3,56	0,0	156	71	0.0111506	1	1.0,0.699	1.0,1.0	-0.151
61212	ENSG00000102098	SCML2	chrX	-	18260558	18260710	18257433	18259499	18264696	18264948	61212	8138	2,47	6132	0,15	223	85	0.0112301	1	0.604,0.528	1.0,0.77	-0.319
24039	ENSG00000108848	LUC7L3	chr17	+	48815497	48815560	48814647	48814840	48817666	48817706	24039	2,15	4,12	0,2	1,19	60	33	0.0112528	1	0.216,0.407	0.0,0.055	0.284
28800	ENSG00000136100	VPS36	chr13	-	52992126	52992191	52991191	52991276	53000066	53000201	28800	1,54	0,11	7,43	0,0	109	78	0.0113231	1	1.0,0.778	1.0,1.0	-0.111
16373	ENSG00000130590	SAMD10	chr20	-	62609597	62609714	62608649	62608759	62611206	62611337	16373	9147	4,87	12,74	2,16	188	85	0.0113389	1	0.504,0.433	0.731,0.676	-0.235
8229	ENSG00000086758	HUWE1	chrX	-	53570846	53570929	53569403	53569500	53573396	53573553	8229	8162	0,20	15126	0,0	152	85	0.0113617	1	1.0,0.819	1.0,1.0	-0.091
28420	ENSG00000158481	CD1C	chr1	+	158263001	158263092	158262385	158262664	158263244	158263420	28420	96536	12141	72286	0,45	168	85	0.0113806	1	0.802,0.658	1.0,0.763	-0.151
12826	ENSG00000234127	TRIM26	chr6	-	30172432	30172542	30166442	30166930	30181081	30181196	12826	2,94	0,24	8,77	0,4	181	85	0.0114268	1	1.0,0.648	1.0,0.9	-0.126
8925	ENSG00000144218	AFF3	chr2	-	100720863	100720980	100625273	100625394	100758945	100759037	8925	4,96	0,0	4,48	2,6	188	85	0.0116949	1	1.0,1.0	0.475,0.783	0.371
52699	ENSG00000183765	CHEK2	chr22	-	29099492	29099554	29095825	29095925	29105993	29106047	52699	5,25	0,4	3,3	1,5	72	47	0.011816	1	1.0,0.803	0.662,0.281	0.43
53029	ENSG00000109685	WHSC1	chr4	+	1944065	1944159	1941380	1941505	1952798	1952930	53029	5,41	22273	10140	17101	170	85	0.0119891	1	0.102,0.07	0.227,0.409	-0.232
51367	ENSG00000087470	DNM1L	chr12	+	32860300	32860347	32854348	32854496	32871576	32871652	51367	3,55	0,13	9,45	0,0	64	69	0.0119993	1	1.0,0.82	1.0,1.0	-0.09
21148	ENSG00000213047	DENND1B	chr1	-	197616184	197616244	197614819	197614873	197621364	197621445	21148	1,6	2,6	0,0	6,11	57	36	0.0121183	1	0.24,0.387	0.0,0.0	0.314
34703	ENSG00000116786	PLEKHM2	chr1	+	16047823	16047883	16046228	16046415	16051811	16052040	34703	7173	14157	12126	35225	106	85	0.0121213	1	0.286,0.469	0.216,0.31	0.114
24494	ENSG00000100379	KCTD17	chr22	+	37457143	37457215	37455352	37455478	37457578	37457669	24494	3,5	4,4	3,0	6,16	129	84	0.0121281	1	0.328,0.449	0.246,0.0	0.266
38586	ENSG00000196498	NCOR2	chr12	-	124858958	124859009	124856567	124857156	124862782	124862930	38586	0,73	11276	10,73	7148	88	85	0.0121876	1	0.0,0.203	0.58,0.323	-0.35
54758	ENSG00000105132	none_found	chr19	-	58055018	58055951	58053207	58054611	58057824	58059361	54758	10214	0,0	9159	0,9	1004	85	0.0123714	1	1.0,1.0	1.0,0.599	0.201
60451	ENSG00000178927	C17orf62	chr17	-	80407306	80407356	80407045	80407168	80408575	80408694	60451	12289	16263	5228	35285	86	85	0.0124853	1	0.426,0.521	0.124,0.442	0.191
35279	ENSG00000144485	HES6	chr2	-	239148301	239148388	239148127	239148209	239148465	239148612	35279	24533	1,8	26554	7,51	150	75	0.012653	1	0.923,0.971	0.65,0.845	0.2
45141	ENSG00000113971	ACAD11	chr3	-	132338311	132338389	132337477	132337616	132345534	132345661	45141	5,46	0,2	1,9	0,4	142	85	0.0127595	1	1.0,0.932	1.0,0.574	0.179
37915	ENSG00000104824	HNRNPL	chr19	-	39332252	39332322	39331127	39331199	39334481	39334554	37915	4,65	17647	0,3	1331610	87	46	0.0129736	1	0.111,0.05	0.0,0.001	0.08
18202	ENSG00000120370	GORAB	chr1	+	170502604	170502792	170501312	170501425	170508350	170508505	18202	7,56	6,35	2,70	0,13	259	85	0.0130701	1	0.277,0.344	1.0,0.639	-0.509
54260	ENSG00000140153	WDR20	chr14	+	102661274	102661457	102606229	102606509	102689166	102689695	54260	2,65	0,29	8,79	0,10	254	85	0.0132079	1	1.0,0.429	1.0,0.726	-0.148
13153	ENSG00000257076	none_found	chr12	-	123712009	123712119	123707584	123707674	123714807	123715069	13153	6,58	0,3	3,17	0,7	179	83	0.0134084	1	1.0,0.9	1.0,0.53	0.185
55486	ENSG00000176463	SLCO3A1	chr15	+	92705985	92706228	92694179	92694244	92715009	92715665	55486	7329	0,0	4136	0,10	287	58	0.0134647	1	1.0,1.0	1.0,0.733	0.133
28060	ENSG00000151743	AMN1	chr12	-	31862226	31862359	31854796	31854941	31881904	31881991	28060	0,26	3,34	2,39	0,16	199	80	0.0134997	1	0.0,0.235	1.0,0.495	-0.63
23186	ENSG00000119048	UBE2B	chr5	+	133716409	133716499	133710073	133710154	133724015	133724104	23186	8,89	2,30	13,91	0,10	152	71	0.0135788	1	0.651,0.581	1.0,0.81	-0.289
14993	ENSG00000157045	NTAN1	chr16	-	15141711	15141777	15141298	15141407	15149747	15149921	14993	5180	0,76	9192	0,28	118	85	0.0136385	1	1.0,0.63	1.0,0.832	-0.101
743	ENSG00000162769	FLVCR1	chr1	+	213037066	213037211	213032257	213032532	213046019	213046160	743	3,92	0,37	5,71	0,3	216	85	0.0137223	1	1.0,0.495	1.0,0.903	-0.204
26742	ENSG00000054654	SYNE2	chr14	+	64682003	64682072	64680911	64681188	64682965	64683105	26742	0,5	9,82	0,17	2,51	124	85	0.0137655	1	0.0,0.04	0.0,0.186	-0.073
12829	ENSG00000234127	TRIM26	chr6	-	30168811	30168915	30166442	30166930	30181081	30181204	12829	11206	0,24	21288	0,4	175	85	0.0137907	1	1.0,0.807	1.0,0.972	-0.083
45817	ENSG00000114796	KLHL24	chr3	+	183361267	183361330	183353407	183353535	183368083	183369064	45817	4,59	2,14	4,31	0,0	112	85	0.0138123	1	0.603,0.762	1.0,1.0	-0.318
61462	ENSG00000093000	NUP50	chr22	+	45566868	45567033	45564048	45564127	45567480	45567520	61462	21294	15195	52451	19,59	171	20	0.0138484	1	0.141,0.15	0.242,0.472	-0.212
25256	ENSG00000214827	MTCP1,MTCP1NB	chrX	-	154294180	154294332	154293893	154294064	154298968	154299501	25256	5,41	0,2	1,29	0,11	223	85	0.0139413	1	1.0,0.887	1.0,0.501	0.193
30176	ENSG00000135439	AGAP2	chr12	-	58129151	58129210	58128101	58128187	58135694	58135940	30176	11135	0,40	38159	0,6	98	79	0.0139608	1	1.0,0.731	1.0,0.955	-0.112
49267	ENSG00000147443	DOK2	chr8	-	21769739	21770021	21768183	21768368	21771049	21771201	49267	36434	2,45	131442	1,17	353	85	0.0139762	1	0.813,0.699	0.969,0.862	-0.159
18122	ENSG00000131778	CHD1L	chr1	+	146724277	146724390	146714350	146714480	146726524	146726631	18122	23453	0,7	22341	12,12	184	85	0.0140371	1	1.0,0.968	0.459,0.929	0.29
8679	ENSG00000205423	TMEM188	chr16	+	50059561	50059612	50059172	50059251	50060306	50060378	8679	4,66	3,48	2,34	5,54	55	52	0.0140889	1	0.558,0.565	0.274,0.373	0.238
47125	ENSG00000151665	PIGF	chr2	-	46842075	46842324	46839366	46839483	46844108	46844194	47125	7100	1,9	5114	0,0	314	79	0.0141228	1	0.638,0.737	1.0,1.0	-0.313
31640	ENSG00000162642	C1orf52	chr1	-	85724617	85724744	85724206	85724405	85725040	85725355	31640	18436	6,92	6147	3,96	198	85	0.0141354	1	0.563,0.67	0.462,0.397	0.187
37917	ENSG00000119844	AFTPH	chr2	+	64808323	64808407	64806619	64806680	64812555	64812679	37917	1,6	2,41	2,16	0,22	123	54	0.0141359	1	0.18,0.06	1.0,0.242	-0.501
18858	ENSG00000137094	DNAJB5	chr9	+	34990344	34990608	34989741	34989828	34993196	34993329	18858	1,4	3155	1,31	1,93	330	80	0.0142569	1	0.075,0.006	0.195,0.075	-0.095
23159	ENSG00000070610	GBA2	chr9	-	35741668	35741887	35740821	35741061	35744293	35744409	23159	28663	2,41	20373	7,57	290	85	0.0143045	1	0.804,0.826	0.456,0.657	0.258
41784	ENSG00000069424	KCNAB2	chr1	+	6078694	6078895	6052770	6052848	6100576	6100705	41784	2,59	14533	18166	29442	258	71	0.0144625	1	0.038,0.03	0.146,0.094	-0.086
38030	ENSG00000136932	C9orf156	chr9	-	100673199	100675257	100672449	100672898	100675682	100675840	38030	3,45	0,12	20136	0,4	2129	85	0.0144818	1	1.0,0.13	1.0,0.576	-0.223
3846	ENSG00000010361	FUZ	chr19	-	50315894	50315993	50315507	50315592	50316252	50316530	3846	4123	0,28	12153	0,10	163	78	0.0146469	1	1.0,0.678	1.0,0.88	-0.101
17391	ENSG00000242588	none_found	chr7	+	128220052	128220148	128214773	128214845	128231903	128232071	17391	2,85	3,12	9,77	0,2	150	65	0.0147485	1	0.224,0.754	1.0,0.943	-0.483
19121	ENSG00000114857	NKTR	chr3	+	42661507	42661535	42661155	42661200	42662920	42663008	19121	2,12	0,0	0,3	4,1	17	34	0.0149934	1	1.0,1.0	0.0,0.857	0.572
38665	ENSG00000141959	PFKL	chr21	+	45733520	45733565	45732860	45733026	45736126	45736222	38665	5531	4,0	22556	0,0	76	85	0.0150321	1	0.583,1.0	1.0,1.0	-0.209
48225	ENSG00000064012	CASP8	chr2	+	202137620	202137665	202137360	202137499	202149538	202150040	48225	4,30	0,18	7,30	0,3	76	85	0.0150657	1	1.0,0.651	1.0,0.918	-0.134
22829	ENSG00000075292	ZNF638	chr2	+	71655660	71655781	71654479	71654544	71658456	71658558	22829	20186	0,0	33172	2,13	165	58	0.0151046	1	1.0,1.0	0.853,0.823	0.162
42385	ENSG00000100227	POLDIP3	chr22	-	42997975	42998062	42995703	42995799	42998775	42999166	42385	18407	3174	35385	1,88	160	85	0.0151118	1	0.761,0.554	0.949,0.699	-0.166
63874	ENSG00000138600	SPPL2A	chr15	-	51012136	51012297	50999644	51000071	51014320	51014398	63874	19178	4,15	52192	0,6	218	71	0.0151576	1	0.607,0.794	1.0,0.912	-0.255
18540	ENSG00000205583	none_found	chr7	+	74995220	74995328	74994832	74994912	74995592	74995893	18540	1,3	0,4	0,0	1,23	167	73	0.0152563	1	1.0,0.247	0.0,0.0	0.624
12124	ENSG00000196588	MKL1	chr22	-	40990677	40990739	40948109	40948371	41032481	41032689	12124	1,41	0,28	5,42	0,9	110	85	0.0153167	1	1.0,0.531	1.0,0.783	-0.126
44557	ENSG00000183597	C22orf25	chr22	+	20043465	20043536	20039987	20040107	20049052	20049206	44557	2,38	2,18	7,48	0,7	128	85	0.015333	1	0.399,0.584	1.0,0.82	-0.418
51861	ENSG00000111237	VPS29	chr12	-	110937339	110937351	110933816	110934008	110939853	110939912	51861	1,99	5143	6141	13116	5	52	0.0153849	1	0.675,0.878	0.828,0.927	-0.101
52915	ENSG00000185596	none_found	chr15	+	102506155	102506426	102501806	102501844	102512798	102512897	52915	16603	2,48	54453	0,13	288	31	0.0154027	1	0.463,0.575	1.0,0.79	-0.376
27705	ENSG00000139436	GIT2	chr12	-	110385060	110385309	110376969	110377052	110388971	110389121	27705	4124	1,21	10153	0,6	311	76	0.0154313	1	0.494,0.591	1.0,0.862	-0.389
58936	ENSG00000178691	SUZ12	chr17	+	30310017	30310123	30303539	30303633	30315338	30315516	58936	25264	6,38	22250	0,12	177	85	0.015472	1	0.667,0.769	1.0,0.909	-0.237
48992	ENSG00000170791	CHCHD7	chr8	+	57125320	57125468	57124347	57124396	57127156	57127226	48992	23259	14123	32458	13,87	154	20	0.0156504	1	0.176,0.215	0.242,0.406	-0.129
53835	ENSG00000005955	GGNBP2	chr17	+	34901467	34901666	34900780	34900946	34910660	34910741	53835	111252	0,2	12691	2,60	259	74	0.0160131	1	1.0,0.994	0.632,0.767	0.298
19034	ENSG00000006125	AP2B1	chr17	+	33997875	33997917	33984617	33984810	33998772	33998919	19034	4262	10277	8313	8203	70	85	0.0160196	1	0.327,0.535	0.548,0.652	-0.169
57151	ENSG00000181038	METTL23	chr17	+	74725771	74725876	74722949	74723260	74729059	74729297	57151	1,76	2,51	3166	1,48	176	85	0.0160217	1	0.195,0.419	0.592,0.625	-0.302
42767	ENSG00000005893	LAMP2	chrX	-	119572930	119573148	119565102	119565317	119575584	119575749	42767	32406	5,25	38287	0,3	289	85	0.016188	1	0.653,0.827	1.0,0.966	-0.243
30835	ENSG00000135426	KIAA0748	chr12	-	55377777	55377950	55368203	55368391	55378368	55378530	30835	8191	15557	29209	7323	244	85	0.0161901	1	0.157,0.107	0.591,0.184	-0.255
39395	ENSG00000171466	ZNF562	chr19	-	9768684	9768811	9767222	9767329	9785690	9785776	39395	10,30	3,8	22,26	0,1	192	79	0.016602	1	0.578,0.607	1.0,0.915	-0.365
48350	ENSG00000066427	ATXN3	chr14	-	92562436	92562481	92560089	92560175	92563017	92563182	48350	19,88	0,0	3,40	1,6	70	79	0.0166632	1	1.0,1.0	0.772,0.883	0.173
9884	ENSG00000123453	SARDH	chr9	-	136555501	136555649	136550314	136550408	136559379	136559493	9884	19315	2,36	26330	1,9	219	85	0.0167583	1	0.787,0.773	0.91,0.934	-0.142
48199	ENSG00000144182	LIPT1	chr2	+	99772763	99772889	99771417	99771514	99778419	99778738	48199	0,34	1,13	4,42	1,3	197	85	0.0168884	1	0.0,0.53	0.633,0.858	-0.481
13037	ENSG00000119318	RAD23B	chr9	+	110062421	110062503	110045596	110045976	110068659	110068734	13037	9176	0,33	20156	0,1	133	68	0.0169676	1	1.0,0.732	1.0,0.988	-0.128
56145	ENSG00000144504	ANKMY1	chr2	-	241446976	241447108	241439868	241439982	241448764	241448872	56145	7,39	0,8	24,41	0,0	203	85	0.0170189	1	1.0,0.671	1.0,1.0	-0.164
45225	ENSG00000084070	SMAP2	chr1	+	40872407	40872541	40839368	40839895	40878687	40878774	45225	16289	8,62	33219	6,19	200	80	0.0171159	1	0.444,0.651	0.688,0.822	-0.207
8123	ENSG00000187862	TTC24	chr1	+	156553588	156553687	156552022	156552226	156554668	156554766	8123	7264	1,22	18141	0,0	170	85	0.0171765	1	0.778,0.857	1.0,1.0	-0.183
49057	ENSG00000003756	RBM5	chr3	+	50147811	50147896	50147035	50147121	50150815	50150977	49057	3231	0,33	6159	0,4	150	79	0.0172079	1	1.0,0.787	1.0,0.954	-0.084
25323	ENSG00000107021	TBC1D13	chr9	+	131553013	131553054	131550612	131550686	131553658	131553720	25323	2,13	0,2	3,10	2,10	20	37	0.0172499	1	1.0,0.923	0.735,0.649	0.27
45337	ENSG00000055208	TAB2	chr6	+	149691044	149691235	149639062	149639151	149699153	149700654	45337	8106	0,11	14,91	0,0	259	82	0.0172971	1	1.0,0.753	1.0,1.0	-0.123
8406	ENSG00000113742	CPEB4	chr5	+	173359452	173359503	173337525	173337607	173371969	173372143	8406	3,9	6,9	0,1	4,11	78	75	0.0173795	1	0.325,0.49	0.0,0.08	0.368
38969	ENSG00000110074	FOXRED1	chr11	+	126141613	126141750	126139086	126139186	126142863	126142974	38969	2,7	0,6	0,3	3,18	208	85	0.0174223	1	1.0,0.323	0.0,0.064	0.63
51290	ENSG00000137434	C6orf52	chr6	-	10685081	10685156	10683419	10683465	10687198	10687397	51290	2,5	0,0	0,3	2,7	90	39	0.0175332	1	1.0,1.0	0.0,0.157	0.922
54217	ENSG00000181852	RNF41	chr12	-	56606779	56606861	56604080	56604352	56607741	56607854	54217	0,5	5201	4,33	3175	150	85	0.0175636	1	0.0,0.014	0.43,0.097	-0.257
31285	ENSG00000130751	NPAS1	chr19	+	47544235	47544383	47543701	47543808	47546067	47546162	31285	0,101	4,12	48133	10,11	219	85	0.0177777	1	0.0,0.766	0.651,0.824	-0.355
24493	ENSG00000100379	KCTD17	chr22	+	37457143	37457215	37456862	37456962	37457578	37457669	24493	6,8	0,7	1,11	7,15	129	84	0.0178511	1	1.0,0.427	0.085,0.323	0.51
60082	ENSG00000100425	BRD1	chr22	-	50181037	50181142	50171325	50171461	50187681	50187942	60082	6239	0,55	22242	0,21	176	85	0.0180636	1	1.0,0.677	1.0,0.848	-0.085
23674	ENSG00000182923	CEP63	chr3	+	134266176	134266314	134264990	134265130	134267903	134268018	23674	9207	19315	15238	23160	209	85	0.0181579	1	0.162,0.211	0.21,0.377	-0.107
33137	ENSG00000185187	SIGIRR	chr11	-	408694	408893	408072	408206	414822	414999	33137	22274	3,54	34313	0,27	270	85	0.0182422	1	0.698,0.615	1.0,0.785	-0.236
43752	ENSG00000179304	FAM156A,FAM156B	chrX	+	52929596	52929686	52928493	52928567	52936135	52937089	43752	4,52	0,10	8,44	0,0	148	67	0.0182558	1	1.0,0.702	1.0,1.0	-0.149
43751	ENSG00000179304	FAM156A,FAM156B	chrX	+	52929593	52929686	52928493	52928567	52936135	52937587	43751	4,52	0,10	8,44	0,0	152	67	0.0182761	1	1.0,0.696	1.0,1.0	-0.152
23765	ENSG00000213625	LEPROT,LEPR	chr1	+	65895613	65895731	65890985	65891061	65897485	65897603	23765	4,46	0,6	4,57	1,30	173	69	0.0183077	1	1.0,0.754	0.615,0.431	0.354
59361	ENSG00000233429	none_found	chr7	+	27138692	27138985	27135851	27136007	27139397	27139585	59361	18189	12,50	17117	33,65	364	85	0.0183313	1	0.259,0.469	0.107,0.296	0.163
15170	ENSG00000144674	GOLGA4	chr3	+	37327504	37327552	37323448	37323763	37330725	37330782	15170	1,26	0,5	1,8	0,9	47	50	0.0184783	1	1.0,0.847	1.0,0.486	0.181
26937	ENSG00000152256	PDK1	chr2	+	173433468	173433545	173431583	173431661	173435453	173435552	26937	10172	2,55	4123	0,12	126	71	0.0185355	1	0.738,0.638	1.0,0.852	-0.238
1151	ENSG00000101294	HM13	chr20	+	30155880	30156083	30154012	30154098	30156922	30157370	1151	29157	107273	70242	141199	268	79	0.0186015	1	0.074,0.145	0.128,0.264	-0.087
46792	ENSG00000177565	TBL1XR1	chr3	-	176797614	176797733	176782707	176782810	176914908	176914971	46792	1,25	0,31	2,54	0,19	161	56	0.0186828	1	1.0,0.219	1.0,0.497	-0.139
39358	ENSG00000166167	BTRC	chr10	+	103221737	103221815	103113863	103113985	103239124	103239214	39358	2,51	0,13	6,54	0,2	140	83	0.0187089	1	1.0,0.699	1.0,0.941	-0.121
15736	ENSG00000101363	MANBAL	chr20	+	35929610	35929816	35918051	35918089	35944710	35945659	15736	11214	0,10	10240	0,0	223	31	0.0187226	1	1.0,0.748	1.0,1.0	-0.126
35865	ENSG00000170946	DNAJC24	chr11	+	31443518	31443679	31436357	31436496	31447833	31449525	35865	0,0	9,55	3,7	3,37	232	85	0.0188073	1	0.0,0.0	0.268,0.065	-0.167
53218	ENSG00000109586	GALNT7	chr4	+	174216914	174216994	174216546	174216677	174219265	174219448	53218	0,113	2,4	20126	0,6	146	85	0.0189053	1	0.0,0.943	1.0,0.924	-0.491
41946	ENSG00000060138	CSDA	chr12	-	10862506	10862713	10856649	10856747	10865809	10865932	41946	1181685	31441	901343	38617	278	85	0.0190628	1	0.538,0.539	0.42,0.4	0.128
43813	ENSG00000028310	BRD9	chr5	-	868721	868919	865528	865696	870587	870668	43813	2142	17293	8234	22215	258	74	0.0190902	1	0.033,0.122	0.094,0.238	-0.088
42180	ENSG00000197622	CDC42SE1	chr1	-	151029131	151029262	151028058	151028469	151031954	151032249	42180	4104	34832	20329	87740	202	85	0.0192291	1	0.047,0.05	0.088,0.158	-0.075
19683	ENSG00000185267	CDNF	chr10	-	14870143	14870271	14867477	14867619	14879830	14880071	19683	1,2	0,2	1,29	0,0	199	85	0.0192417	1	1.0,0.299	1.0,1.0	-0.351
13957	ENSG00000158636	C11orf30	chr11	+	76250642	76250684	76248838	76248994	76253259	76253411	13957	0,38	3,13	5,32	0,6	70	85	0.0192864	1	0.0,0.78	1.0,0.866	-0.543
61856	ENSG00000178177	LCORL	chr4	-	17887690	17887784	17844838	17847524	17910716	17910968	61856	3,73	4,82	16,64	9,31	170	85	0.019428	1	0.273,0.308	0.471,0.508	-0.199
11136	ENSG00000081791	KIAA0141	chr5	+	141316762	141316922	141314058	141314151	141318085	141318325	11136	1,20	3,40	2,41	0,26	231	85	0.0195618	1	0.109,0.155	1.0,0.367	-0.552
10762	ENSG00000072803	FBXW11	chr5	-	171423893	171424055	171337575	171337801	171433461	171433663	10762	4,36	5124	14,54	2,76	233	85	0.0198208	1	0.226,0.096	0.719,0.206	-0.302
35452	ENSG00000100445	SDR39U1	chr14	-	24911314	24911466	24910883	24911001	24911551	24911581	35452	16472	0,33	7295	0,53	161	23	0.01989	1	1.0,0.671	1.0,0.443	0.114
38711	ENSG00000196313	POM121	chr7	+	72384301	72384365	72361471	72361649	72396799	72397015	38711	4,44	20209	24,39	29,99	114	85	0.0199372	1	0.13,0.136	0.382,0.227	-0.172
3434	ENSG00000169682	SPNS1	chr16	+	28993221	28993377	28992790	28992936	28993676	28993866	3434	47383	0,95	61323	14113	227	85	0.0199422	1	1.0,0.602	0.62,0.517	0.232
26042	ENSG00000083642	PDS5B	chr13	+	33344791	33344899	33344258	33344698	33347326	33347462	26042	21276	0,23	43331	0,0	179	85	0.0200999	1	1.0,0.851	1.0,1.0	-0.075
49639	ENSG00000165819	METTL3	chr14	-	21969054	21969271	21967907	21967946	21971315	21971720	49639	5186	4,11	13315	0,4	235	32	0.0201025	1	0.145,0.697	1.0,0.915	-0.537
50234	ENSG00000198925	ATG9A	chr2	-	220093145	220093207	220092643	220092775	220094256	220094361	50234	0,47	1,38	1,46	0,14	110	85	0.0201239	1	0.0,0.489	1.0,0.717	-0.614
22254	ENSG00000150527	CTAGE5	chr14	+	39790131	39790260	39788412	39788495	39796067	39796226	22254	7,46	2,16	1,24	7,20	191	76	0.0206935	1	0.582,0.534	0.054,0.323	0.37
46790	ENSG00000177565	TBL1XR1	chr3	-	176797614	176797733	176782707	176782810	176914127	176914223	46790	1,26	0,12	2,47	0,4	190	85	0.0207084	1	1.0,0.492	1.0,0.84	-0.174
43717	ENSG00000177058	SLC38A9	chr5	-	54923718	54923808	54921672	54922487	54929581	54929730	43717	14101	0,2	2,80	0,12	166	85	0.0207209	1	1.0,0.963	1.0,0.773	0.095
30253	ENSG00000102858	MGRN1	chr16	+	4730032	4730098	4727463	4727573	4731550	4731777	30253	12156	3,60	31152	1,30	118	85	0.0209636	1	0.742,0.652	0.957,0.785	-0.174
42813	ENSG00000157703	SVOPL	chr7	-	138305790	138305880	138281161	138281275	138310713	138310795	42813	12,92	0,7	0,66	3,4	156	75	0.0209652	1	1.0,0.863	0.0,0.888	0.488
59955	ENSG00000165219	GAPVD1	chr9	+	128097450	128097531	128094788	128094908	128099296	128099374	59955	0,22	7,73	4,33	5,46	134	71	0.0210137	1	0.0,0.138	0.298,0.275	-0.217
7682	ENSG00000115504	EHBP1	chr2	+	63176228	63176297	63175426	63175451	63182651	63182795	7682	3,17	0,6	2,34	0,0	62	18	0.0210167	1	1.0,0.451	1.0,1.0	-0.274
22950	ENSG00000068745	IP6K2	chr3	-	48732134	48732257	48731607	48731673	48732522	48732851	22950	1,72	0,18	6,51	5,71	168	59	0.0211262	1	1.0,0.584	0.296,0.201	0.544
16173	ENSG00000141905	NFIC	chr19	+	3456547	3456633	3452479	3452664	3462749	3463603	16173	0,44	1,9	13,38	1,1	158	85	0.0212526	1	0.0,0.725	0.875,0.953	-0.551
39899	ENSG00000047621	C12orf4	chr12	-	4645182	4645377	4643322	4643468	4647574	4647674	39899	1,65	0,0	4,32	0,6	266	85	0.0212693	1	1.0,1.0	1.0,0.63	0.185
56004	ENSG00000153066	TXNDC11	chr16	-	11794307	11794420	11791980	11792181	11815432	11815526	56004	3,43	0,7	4,60	0,0	184	85	0.0214114	1	1.0,0.739	1.0,1.0	-0.131
59219	ENSG00000162650	ATXN7L2	chr1	+	110034648	110034726	110033637	110034339	110035207	110035356	59219	1,6	4,38	9,15	1,37	142	85	0.0216392	1	0.13,0.086	0.843,0.195	-0.411
10713	ENSG00000130985	UBA1	chrX	+	47057707	47057754	47053227	47053423	47058201	47058318	10713	0,66	232301	9135	271237	80	85	0.0216616	1	0.0,0.03	0.262,0.104	-0.168
57661	ENSG00000159111	MRPL10	chr17	-	45906504	45906602	45905866	45906036	45908676	45908889	57661	2,68	1,63	3,59	9120	170	85	0.0218665	1	0.5,0.351	0.143,0.197	0.256
11215	ENSG00000132334	PTPRE	chr10	+	129854386	129854477	129847828	129847930	129859202	129859279	11215	11155	2,44	14113	0,12	153	70	0.0218958	1	0.716,0.617	1.0,0.812	-0.24
64037	ENSG00000179950	PUF60	chr8	-	144906482	144906566	144903987	144904083	144911449	144911469	64037	14601	2,79	16462	4132	82	13	0.0220963	1	0.526,0.547	0.388,0.357	0.164
17096	ENSG00000101084	TGIF2-C20ORF24,C20orf24	chr20	+	35236292	35236403	35236117	35236221	35240412	35240960	17096	12,46	3,12	21,69	0,6	182	85	0.0221713	1	0.651,0.642	1.0,0.843	-0.275
64947	ENSG00000168411	RFWD3	chr16	-	74671753	74671868	74666420	74666571	74678259	74678351	64947	4123	0,30	6140	0,6	186	85	0.0221861	1	1.0,0.652	1.0,0.914	-0.131
15503	ENSG00000137500	CCDC90B	chr11	-	82989768	82989872	82985681	82985783	82991183	82991303	15503	51309	7,60	50367	3,28	175	85	0.0222822	1	0.78,0.714	0.89,0.864	-0.13
23678	ENSG00000182923	CEP63	chr3	+	134206860	134206932	134205068	134205398	134214137	134214206	23678	0,6	7,40	7,2	2,31	107	62	0.0222888	1	0.0,0.08	0.67,0.036	-0.313
33985	ENSG00000080822	CLDND1	chr3	-	98240496	98240540	98239976	98240286	98241385	98241450	33985	1,10	0,0	1,6	0,6	47	58	0.022292	1	1.0,1.0	1.0,0.552	0.224
25812	ENSG00000121542	SEC22A	chr3	+	122928045	122928246	122920775	122920833	122942405	122942569	25812	1,88	0,7	6102	0,0	238	51	0.0223334	1	1.0,0.729	1.0,1.0	-0.135
23114	ENSG00000185485	none_found	chr3	-	195690170	195690292	195686791	195686957	195692299	195692413	23114	10132	0,40	24118	0,12	193	85	0.0223462	1	1.0,0.592	1.0,0.812	-0.11
1312	ENSG00000163702	IL17RC	chr3	+	9960018	9960093	9959606	9959759	9960183	9960293	1312	2,71	0,1	1,40	1,7	136	85	0.022348	1	1.0,0.978	0.385,0.781	0.406
62821	ENSG00000122359	ANXA11	chr10	-	81940696	81941211	81935862	81935911	81965098	81965278	62821	5,69	2100	2,7	9,87	543	42	0.0223531	1	0.162,0.051	0.017,0.006	0.095
35183	ENSG00000173264	GPR137	chr11	+	64055536	64055686	64054436	64054486	64055811	64055940	35183	26387	0,1	19191	4,8	179	43	0.0223543	1	1.0,0.989	0.533,0.852	0.302
6466	ENSG00000154889	MPPE1	chr18	-	11906201	11906308	11896982	11897355	11908199	11908316	6466	14134	5,35	10,68	2,4	178	85	0.02244	1	0.572,0.646	0.705,0.89	-0.189
14245	ENSG00000154114	TBCEL	chr11	+	120924338	120924441	120918236	120918376	120925760	120926017	14245	4,27	2,5	12,33	1,0	174	85	0.0225522	1	0.494,0.725	0.854,1.0	-0.318
11620	ENSG00000130731	C16orf13	chr16	-	685280	685340	684718	684797	686093	686347	11620	23144	0,5	102188	17,27	93	72	0.022594	1	1.0,0.957	0.823,0.844	0.145
38451	ENSG00000182220	ATP6AP2	chrX	+	40456500	40456596	40450485	40450617	40456778	40456916	38451	23163	1,14	27176	0,0	170	85	0.0226511	1	0.92,0.853	1.0,1.0	-0.113
50271	ENSG00000153975	ZUFSP	chr6	-	116987796	116988370	116981898	116982009	116989728	116989957	50271	13351	2,31	36210	0,5	645	85	0.0226666	1	0.461,0.599	1.0,0.847	-0.393
59362	ENSG00000233429	none_found	chr7	+	27138716	27138985	27135742	27136007	27139397	27139585	59362	17169	12,50	17107	33,65	340	85	0.0227101	1	0.262,0.458	0.114,0.292	0.157
10872	ENSG00000125844	RRBP1	chr20	-	17660643	17660720	17639240	17641173	17662672	17662878	10872	0,25	6120	1,54	6,97	140	85	0.0228671	1	0.0,0.112	0.092,0.253	-0.116
28896	ENSG00000189050	RNFT1	chr17	-	58035984	58036062	58035651	58035805	58037428	58037529	28896	0,5	1,3	0,0	4,9	142	85	0.0229223	1	0.0,0.499	0.0,0.0	0.25
56051	ENSG00000145029	NICN1	chr3	-	49463315	49463429	49462799	49462871	49463684	49463861	56051	7443	0,3	5570	0,43	165	65	0.0229471	1	1.0,0.983	1.0,0.839	0.072
61237	ENSG00000073417	PDE8A	chr15	+	85633948	85634146	85632568	85632647	85634274	85634412	61237	0,18	3,17	6,27	4,6	256	72	0.0230823	1	0.0,0.229	0.297,0.559	-0.314
43866	ENSG00000113108	APBB3	chr5	-	139941428	139941580	139941171	139941286	139941684	139941812	43866	3175	3,98	3129	6151	223	85	0.0231723	1	0.276,0.405	0.16,0.246	0.138
11121	ENSG00000061273	HDAC7	chr12	-	48196006	48196057	48192567	48192755	48213549	48213658	11121	23417	4286	12239	8248	88	85	0.0231733	1	0.847,0.585	0.592,0.482	0.179
36256	ENSG00000259024	FAM18B2,FAM18B2-CDRT4	chr17	-	15443746	15443875	15406411	15406546	15449098	15449230	36256	1,21	0,0	4,11	0,8	200	85	0.0231748	1	1.0,1.0	1.0,0.369	0.316
57425	ENSG00000093144	ECHDC1	chr6	-	127637594	127637647	127635960	127636041	127648146	127648282	57425	7,55	0,22	3,32	6,19	81	74	0.0231824	1	1.0,0.695	0.314,0.606	0.387
64031	ENSG00000179950	PUF60	chr8	-	144906482	144906569	144903987	144904083	144911449	144911485	64031	17683	2,79	15553	4132	104	29	0.0232256	1	0.703,0.707	0.511,0.539	0.18
63328	ENSG00000169016	E2F6	chr2	-	11595467	11595600	11593707	11593924	11597304	11597359	63328	1,1	1,4	10,11	0,3	167	48	0.0232344	1	0.223,0.067	1.0,0.513	-0.611
63336	ENSG00000115904	SOS1	chr2	-	39285813	39285945	39283842	39284007	39294768	39294894	63336	4,50	0,0	1,4	0,1	203	85	0.0233798	1	1.0,1.0	1.0,0.626	0.187
23184	ENSG00000119048	UBE2B	chr5	+	133724015	133724104	133710073	133710154	133725915	133726474	23184	35210	1,77	42190	0,19	153	74	0.0235403	1	0.944,0.569	1.0,0.829	-0.158
58037	ENSG00000251022	none_found	chr4	-	83816844	83816927	83814638	83816000	83821229	83821376	58037	8,34	0,15	8,29	0,1	152	85	0.0236302	1	1.0,0.559	1.0,0.942	-0.191
59523	ENSG00000096717	SIRT1	chr10	+	69665919	69666044	69651241	69651312	69666546	69666694	59523	0,8	4,38	3,14	0,19	175	64	0.0237664	1	0.0,0.071	1.0,0.212	-0.571
56152	ENSG00000144504	ANKMY1	chr2	-	241492330	241492474	241465101	241465266	241500147	241500508	56152	7,89	1,13	4108	0,2	215	85	0.0238125	1	0.735,0.73	1.0,0.955	-0.245
[truncated: 44,925 more rows]

## Sheet: RASL-Seq data
	event_id	gene_symbol	event_type	TOTAL READS		Delta PSI				Significance (T-Test), p value 2 tails, type 3 (unpaired)				% INCLUSION													short_isoform	long_isoform	short_isoform	long_isoform	short_isoform	long_isoform	short_isoform	long_isoform	short_isoform	long_isoform	short_isoform	long_isoform	short_isoform	long_isoform	short_isoform	long_isoform	short_isoform	long_isoform	short_isoform	long_isoform	short_isoform	long_isoform	short_isoform
[truncated: 3,289 more rows]
[truncated: 4 more columns]

[truncated: 1 more sheets: Limma analysis]
