# Supplementary material
Source: HighWire-hosted journal article supplement (doi:10.1101/rna.052969.115)
Supplement: Table_S3.xlsx [file Table_S3.xlsx]

## Sheet: S2A hnRNP L responsive exons
Delta PSIs are LKD-WT : a negative deltaPSI indicates an L enhanced exon, a positive deltaPSI indicates an L repressed exon
gene_symbol	queried_in	ENSEMBL_ID	RASL_event_ID	MATS_ID	chrom	strand	alt_start	alt_end	C1_start	C1_end	C2_start	C2_end	resting_ composite_deltaPSI	stim_ composite_deltaPSI	alt_length	C1_length	C2_length	I1_length	I2_length	alt_exon_5ss_sequence	alt_exon_5ss_score	alt_exon_3ss_sequence	alt_exon_3ss_score	C1_5ss_sequence	C1_5ss_score	C2_3ss_sequence	C2_3ss_score	L_alt_exon_binding_pattern	exon_terminal_sequence	resting_wt_mean_RPKMs	resting_kd_mean_RPKMs	stim_wt_mean_RPKMs	stim_kd_mean_RPKMs	PMA_RASL_deltaPSI	PMA_RASL_p	PMA_MATS_deltaPSI	PMA_MATS_p	resting_L_kd_RASL_deltaPSI	resting_L_kd_RASL_p	resting_L_kd_MATS_deltaPSI	resting_L_kd_MATS_p	stim_L_kd_RASL_deltaPSI	stim_L_kd_RASL_p	stim_L_kd_MATS_deltaPSI	stim_L_kd_MATS_p	resting_wt_mean_RPKM	resting_L_kd_mean_RPKM	stim_wt_mean_RPKM	stim_L_kd_mean_RPKM
SLC30A6	MATS_only	ENSG00000152683	NA	36857	chr2	+	32431954	32432002	32422775	32422895	32445281	32446809	-100	NA	48	120	1528	9059	13279	GAGGTAAGA	10.06	TTTATTGTATTTTTCCCCAGACA	9.69	TAAGTGAGT	6.43	TATGATTTTGCCCCTTTTAGGCT	9.64	none	TCAGTTGGACAAACTCATCAGAGAGGTAAGATGGA	1.31474423834045,1.30978917211555,1.25993012810149,1.29113582786871	1.62632434271774,1.62019497961704,1.55851988371621,1.5971209953872	1.30663215772653,1.30170766466978,1.25215625507812,1.28316941309863	1.16478181222007,1.16039193101823,1.11621991189186,1.14386622549909	NA	NA	-65.9	1	NA	NA	-100	0.0205751	NA	NA	NA	NA	1.2939	1.60054	1.28592	1.14631
NPIP	MATS_only	ENSG00000233024	NA	19737	chr16	-	18453949	18454010	18455026	18455134	18453804	18453840	-81.2	-64.5	61	108	36	1016	109	AAAGTAAGG	6.6	AAAGTGATTGTAATCCATAGGGA	5.43	CATGTGAGT	7.83	TCATGTGTTGGCTTTTTCAGATC	10.67	none	GGCAGAGGACTACTACAGATGCAAAGTAAGGAGCT	32.1001	31.6983	31.7001	29.3948	NA	NA	NA	NA	NA	NA	-81.2	0.00255169	NA	NA	-64.5	1	32.1001	31.6983	31.7001	29.3948
GAR1	MATS_only	ENSG00000109534	NA	3765	chr4	+	110737308	110737534	110736708	110736960	110739091	110739246	-73.6	-76.9	226	252	155	348	1557	TCTGTATGC	0.77	GGTCGTTTTTTTTTCATCAGGGA	7.75	CCGGTGAGT	10.9	ATTTTCTTGTCCTGTTTCAGTAT	9.68	none	CAAGGACCTCCAGAACGTGTAGTCTGTATGCAGTC	8.81118096093776,11.0751649578454	6.64271110162124,8.34951881523226	9.31211113353779,11.7048063553496	9.70781055223165,12.2021785413467	NA	NA	NA	NA	NA	NA	-73.6	1.97e-05	NA	NA	-76.9	0.000274491	9.94317	7.49611	10.5085	10.955
IL32	MATS_only	ENSG00000008517	NA	51283	chr16	+	3115621	3115688	3115404	3115495	3115784	3115827	-73	-21	67	91	43	126	96	CAGGTGGGG	6.92	CACTTTCCCCATAAAACCAGCTG	3.3	CGGGTAAgt	10.75	CACCTGTTCCTCGCCAGCAGGCC	6.72	none	TCTCAGTGGAGCTGGGTCATCTCAGGTGGGGAGTT	186.640870305756,157.360513588064,179.337325403001,193.819966339067,192.204577449853,191.13320299361,148.248020579939	216.811036187824,182.797561703312,208.278854327865,224.903610173405,223.222628629415,221.978355337167,172.212050351435	178.349704380867,150.370071858731,171.400416873404,185.426307595127,183.703202366008,182.674245853929,141.662384032858	533.859060156276,450.106858975796,512.912991682873,554.453426538431,549.720384609493,546.656168418804,424.041898257232	NA	NA	-48.3	0.107884	NA	NA	-73	0.0178966	NA	NA	-21	1	178.392	207.172	170.512	510.25
DMD	both	ENSG00000198947	1230	23363	chrX	-	31144758	31144790	31152218	31152311	31137344	31140047	-21.1	-43.3	32	93	2703	7428	4711	GAGGTTAGT	7.15	TCCTCTCTCTATTATTAAAGGAA	7.17	GAGGTAAGC	9.85	TCTTTCTCTTTGTTTTCCAGGAC	12.74	none	TACCCCTGGAAAGCCAATGAGAGAGGTTAGTGAGA	0.165700264255943,0.166452592356991,0.0878090452928811,0.0872478854493564,0.0877651407702347,0.159852550883237,0.120065282052203,0.201193778977822,0.158320900260739,0.118333454804526,0.0860192662915724,0.159007572639208,0.0873347054362986,0.248530891738202,0.246795946595178,0.246419651316117,0.244713956130715	0.24452564966545,0.245635868279142,0.128125276460719,0.127306468331665,0.128061213822488,0.235896116586918,0.181914647252966,0.306519137831822,0.233635843405046,0.179290701866928,0.130693759550578,0.234649173167713,0.127433150438186,0.368477744585017,0.36590547411671,0.365347569886952,0.362818666093662	0.5539727973468,0.556487997334754,0.284700841076054,0.282881408022242,0.284558490655516,0.534422592344372,0.407718643862167,0.694343853316446,0.529301944023664,0.401837691060846,0.290408140339498,0.531597642344178,0.283162902066759,0.857709904920557,0.851722401221286,0.850423761097446,0.844537202508842	0.558446314850647,0.560981825928289,0.288967615508473,0.287120914848403,0.288823131700719,0.538738235337591,0.409827540611744,0.694144570330396,0.53357623605163,0.403916168985006,0.294760449322792,0.535890472911708,0.28740662760751,0.85746373439539,0.851477949164009,0.850179681761667,0.84429481266879	1.12	0.711586	-65.8	0.0103762	-21.1	0.0441504	-71.2	1	-43.3	0.0263464	22.8	0.215257	0.157151	0.233308	0.531752	0.534472
LINC01155	MATS_only	ENSG00000232593	NA	43945	chrX	+	53123581	53123656	53123338	53123466	53171029	53171889	-68.7	-13	75	128	860	115	47373	CAGGTGAGT	10.67	GGGCGGCCTCTCAACCCTAGGTC	8.76	ACGGTGAGA	8.94	AAGGATGAATATATTTACAGGTG	3.35	none	CCTGCGGCTCCCAGACTGCAACCAGGTGAGTACCC	not_in_refSeq	not_in_refSeq	not_in_refSeq	not_in_refSeq	NA	NA	-6.9	1	NA	NA	-68.7	0.000705209	NA	NA	-13	1	not_in_refSeq	not_in_refSeq	not_in_refSeq	not_in_refSeq
IL32	MATS_only	ENSG00000008517	NA	51287	chr16	+	3115642	3115688	3115377	3115495	3115784	3115827	-67.6	-21.7	46	118	43	147	96	CAGGTGGGG	6.92	TGAGTATTTGTGCCAGGAAGACT	-5.89	CGGGTAAgt	10.75	CACCTGTTCCTCGCCAGCAGGCC	6.72	none	TCTCAGTGGAGCTGGGTCATCTCAGGTGGGGAGTT	186.640870305756,157.360513588064,179.337325403001,193.819966339067,192.204577449853,191.13320299361,148.248020579939	216.811036187824,182.797561703312,208.278854327865,224.903610173405,223.222628629415,221.978355337167,172.212050351435	178.349704380867,150.370071858731,171.400416873404,185.426307595127,183.703202366008,182.674245853929,141.662384032858	533.859060156276,450.106858975796,512.912991682873,554.453426538431,549.720384609493,546.656168418804,424.041898257232	NA	NA	-36.4	0.0839618	NA	NA	-67.6	0.00892941	NA	NA	-21.7	1	178.392	207.172	170.512	510.25
VPS13B	MATS_only	ENSG00000132549	NA	28940	chr8	+	100519364	100519431	100515063	100515178	100523331	100523740	-67.4	-8.3	67	115	409	4186	3900	GTGGTGAGA	5.46	GGTGAACTTATGTTTTCCAGGCC	4.99	CAGGTAAAT	8.76	ATTTCCTTTTTTTGGAACAGACA	7.61	none	TCTACAATGCAAAGAAAAATCTGTGGTGAGACCCA	3.6121324230296,3.59291077326891	2.680038925866,2.66577733090077	3.55446607599638,3.53555129270564	2.2518507947368,2.23986776581632	NA	NA	-15.7	0.696869	NA	NA	-67.4	0.012691	NA	NA	-8.3	0.077073	3.60252	2.67291	3.54501	2.24586
DPP10	MATS_only	ENSG00000175497	NA	6883	chr2	+	116594082	116594141	116593732	116593832	116594249	116594322	-65	9.7	59	100	73	250	108	CAGGTAACT	8.63	TCTGTTTTCTTGGGTCACAGCCT	6.73	ATGGTGAGT	10.13	ATTTGTATTTTCCTTTATAGGCA	10.82	none	ATCTAAGGAAGAAAGCACTTACCAGGTAACTAATT	7.38084725964577,6.78897321215772,6.8574703719225,6.90021739713357,6.73453707226658	5.21496019672658,4.77728475207475,4.82548503607627,4.67041359021522,4.56010415125865	5.00812696203353,4.61766892886761,4.66425877338122,4.66664855876605,4.55441061884574	3.69900131185251,3.4705369477959,3.50555283552352,3.20994403771015,3.11112798290798	NA	NA	-9.7	1	NA	NA	-65	0.0144215	NA	NA	9.7	1	6.93241	4.80965	4.70222	3.39923
HAPLN3	MATS_only	ENSG00000140511	NA	60060	chr15	-	89422648	89423841	89424587	89424956	89422197	89422500	-64.7	-57.5	1193	369	303	746	148	GAGGTCAGA	5.24	TTTACCTTCTCTGTCTCTAGGAT	13.57	GGGGTGAGA	4.74	CCTCTTTCCTTCCCCTGCAGGTG	13.94	within	GGAGAGAGGCGGCAACGGACAGGAGGTCAGAGGTT	4.90756	2.63689	9.62971	5.6704	NA	NA	-0.3	0.976035	NA	NA	-64.7	0.000572262	NA	NA	-57.5	0.00453474	4.90756	2.63689	9.62971	5.6704
ZNF518A	MATS_only	ENSG00000177853	NA	56824	chr10	+	97894926	97895046	97893339	97893405	97911172	97911323	-63.9	-13.7	120	66	151	1521	16126	ATGGTAAGT	11.01	gaaattgttaatctgggaaggtg	1.37	gcagtaagt	9.07	CTTTGCATCTCTCCTAACAGTTG	10.31	none	GCCAGTTTCAATCTCAGGGAACATGGTAAGTGGTA	9.88715	7.44551	9.03149	5.57705	NA	NA	-34.6	0.492867	NA	NA	-63.9	0.0351494	NA	NA	-13.7	0.203599	9.88715	7.44551	9.03149	5.57705
SDHAP1	MATS_only	ENSG00000185485	NA	25968	chr3	-	195687170	195687294	195690170	195690292	195686618	195686957	-59.3	-20.7	124	122	339	2876	213	caggtgtga	5.29	ttttgtttttttcttggtagaga	7.69	TTTGTAATT	-2.3	aatGATGTCTTTTTTGGCAGTGC	6.29	none	acctccctaagagctgagactacaggtgtgagcca	18.5427	16.8808	16.2352	14.2608	NA	NA	-33.6	0.57425	NA	NA	-59.3	0.0282193	NA	NA	-20.7	0.0709136	18.5427	16.8808	16.2352	14.2608
TOP3B	MATS_only	ENSG00000100038	NA	36279	chr22	-	22325351	22325433	22326248	22326323	22324581	22324778	-58.8	-45.3	82	75	197	815	573	CTAGTGAGT	7.43	ATGGGGCTTTCTCCCTTCAGAAA	9.87	GAGGTGAGT	10.03	TGGCCACTCCCCACCCCCAGGTT	8.78	none	CTAGTCCCACTGCACGGCCTTCCTAGTGAGTCTCG	17.9236	15.3079	19.3968	14.4135	NA	NA	-12.7	0.58717	NA	NA	-58.8	0.0136378	NA	NA	-45.3	0.000272012	17.9236	15.3079	19.3968	14.4135
ZNF227	MATS_only	ENSG00000131115	NA	7065	chr19	+	44721943	44722005	44717242	44717397	44732598	44732725	-58.6	42.7	62	155	127	4546	10593	CAGGTACGT	10.65	GCGTCTTTGGTCTCCCCCAGTTA	8.26	CAGGTACCT	8.16	ACATGTGTTTGATATTGTAGGAG	7.04	none	GCAGGAGAAAATGACCAAGTTTCAGGTACGTAAAG	1.34259	1.60147	1.30894	1.22418	NA	NA	-45.4	0.61347	NA	NA	-58.6	0.032326	NA	NA	42.7	0.392229	1.34259	1.60147	1.30894	1.22418
NPHP3	MATS_only	ENSG00000113971	NA	50874	chr3	-	132418196	132418294	132418761	132418905	132416103	132416206	-56.7	-24.7	98	144	103	467	1990	GAGGTACGA	8.65	TTTGTTTTTATATTTTTAAGCAA	6.76	CAGGTACCG	10.05	TTCTTTTCTTTACATAAAAGGTT	5.95	none	TAGAAACATGCCCTCCAGCATGGAGGTACGATGCC	7.67584978350929,2.46912316863719	6.45557792041139,2.17071134801055	8.60955276319753,3.58342581794057	6.27820024246668,2.64331842763697	NA	NA	-29.8	1	NA	NA	-56.7	0.0346289	NA	NA	-24.7	1	5.07249	4.31314	6.09649	4.46076
CCDC66	both	ENSG00000180376	1187	51877	chr3	+	56593596	56593622	56592872	56592938	56597711	56598153	-5.6	-16.8	26	66	442	658	4089	AAGGTAAGC	10.22	ATTTCTTTTTTCTTTTGTAGAAC	11.6	ATGGTATGT	8.35	AGCTTCTGGTGTTTTAACAGATG	7.86	none	ACATAAATCAAAAATTTCTGTGAAGGTAAGCCGTA	10.1637229027323,10.2256769403171,10.2256769403171	6.92896694371015,6.97120318751204,6.97120318751204	9.09412672502064,9.149560927066,9.149560927066	5.26889581784229,5.30101292420707,5.30101292420707	4.60667	0.428617	-5.4	0.148823	-5.6	0.429405	-56.2	0.0174852	-16.8	0.0993246	-6.7	1	10.205	6.95712	9.13108	5.29031
CPEB2	both	ENSG00000137449	1301	3229	chr4	+	15009961	15010051	15008928	15009210	15018811	15018902	-7.2	-9.6	90	282	91	751	8760	CAGGTAGGC	9.88	AAACTTCTATGCTATTGAAGGTG	4.91	CAGGTAAGA	10.77	TTTTTCCTCTTCTCTTCCAGGAT	13.51	none	AGCCGGAACATCCAGAATAGACCAGGTAGGCTGCA	0.933973907065327,0.948453053712582,0.946357179256823,0.937244314676877,0.949715040330473,0.945104094864693	0.677269261397467,0.687768784865167,0.686248965806096,0.679640790763317,0.688683911870458,0.68534029423154	0.880850946013891,0.894506541663006,0.892529877236821,0.883935338004602,0.895696748474799,0.891348066306244	0.658950370742802,0.669165901368521,0.667687190625956,0.661257754591332,0.67005627586768,0.666803096949977	NA	NA	-49.2	0.438693	-7.2	0.0557533	-54.1	0.0324751	-9.6	0.270692	-2.6	1	0.943475	0.684159	0.889811	0.665653
ATXN3	MATS_only	ENSG00000066427	NA	54424	chr14	-	92562436	92562478	92563017	92563182	92560089	92560175	-53.5	-49.8	42	165	86	539	2261	CAGGTAAGT	10.86	CCTGTCAAAATTAACAGCAGCCT	0.8	CAGGTACTG	9.04	GTTGCTATTTTTCTTAACAGGTT	9.54	none	TGACAGTGGTTTTTTCTCTATTCAGGTAAGTAGTC	4.64498954299644,4.28895157565815,4.28134929812375,4.24746992208349,4.25370336781593,4.24063419872681,4.56308796415267,4.15432632195754,4.21412252810377,4.1513512959464,4.23877372744922,4.23382044234557,4.18673042731442,4.50213338743364,4.31770218207921,4.2393937031297,4.3455374435229,4.2462254245968,4.20617250737161,4.61173186130434	3.57635832024729,3.3022308254429,3.29637753594433,3.27029248510303,3.27509185769638,3.26502939551472,3.5132991055326,3.1985776004505,3.24461702796498,3.19628701208008,3.26359694623327,3.25978321915617,3.22352678294715,3.46636780340837,3.32436703684539,3.26407428965089,3.34579848850721,3.26933429802858,3.23849599743769,3.55075193609278	4.79820987055433,4.43042758097943,4.42257453356854,4.38757760730642,4.39401667042251,4.38051639974528,4.7136066738443,4.29136155829998,4.35313021114554,4.28828839763091,4.37859455868075,4.37347788376555,4.32483455037686,4.65064144023905,4.46012655925205,4.37923498497279,4.48887999883943,4.38629205863741,4.34491794982716,4.76385514594415	3.36818226147839,3.11001144001556,3.10449886434641,3.079932196897,3.08445220305623,3.07497546622168,3.30879365737172,3.01239176030173,3.05575128113189,3.01023450467275,3.07362639830728,3.07003466427478,3.03588867710894,3.2645941770154,3.13085912581933,3.07407595606628,3.15104307520617,3.07902978488502,3.04998654935788,3.34406639803105	NA	NA	18.9	0.100152	NA	NA	-53.5	0.0146144	NA	NA	-49.8	0.00136072	4.30841	3.31721	4.45053	3.12412
ZNF251	MATS_only	ENSG00000198169	NA	69607	chr8	-	145980080	145980220	145980789	145980824	145979576	145979706	-53.1	-3	140	35	130	569	374	CAGGTGAGT	10.67	CCTTCCACACCCCTGGTTGAATG	-13.02	CAGGTGGGG	6.92	GCGGCGATGTTTTGTTGCAGGAG	6.72	none	CACATTCCAGCTTCCAGGGCACCAGGTGAGTTAAC	4.21115	5.87637	4.87989	6.3308	NA	NA	NA	NA	NA	NA	-53.1	0.0287581	NA	NA	-3	0.504338	4.21115	5.87637	4.87989	6.3308
FAM18B2,FAM18B2-CDRT4	MATS_only	ENSG00000259024	NA	36256	chr17	-	15443746	15443875	15449098	15449230	15406411	15406546	-51.9	-31.6	129	132	135	5223	37200	CAAGTAAGT	10.08	ATTTTTTTCCCTTGTCCCAGGCG	8.97	CTGGTGAGT	10.1	ttttattttattttttgtagaga	8.08	none	TTTTGGAAAGCAGTTTTTAAGACAAGTAAGTGTTT	7.21906392493819,1.439115478407,9.21972377974998,7.59777748105832	5.88848780270034,1.15195230727649,7.0254935280323,6.1973990658666	10.7910245506771,1.56089622112537,13.070064042797,11.3571238849203	8.70351538275091,1.41627129940035,9.90185552575165,9.16010356310506	NA	NA	20.1	0.0709995	NA	NA	-51.9	0.3869	NA	NA	-31.6	0.0231748	6.36892	5.06583	9.19478	7.29544
DPM1	MATS_only	ENSG00000000419	NA	36036	chr20	-	49562273	49562299	49562383	49562398	49558567	49558663	-51.6	16.7	26	15	96	84	3610	TAGGTAGGT	7.92	TTATTCTTTTCAAATTTCAGCCA	7.4	CATGTAAGT	8.31	ACAGCTAATTTATTCTACAGGAA	7.42	none	CAAAATTTATTCCTGAATTTATTAGGTAGGTACTA	21.7977	15.2276	17.0588	12.4152	NA	NA	-29.3	1	NA	NA	-51.6	0.0212266	NA	NA	16.7	1	21.7977	15.2276	17.0588	12.4152
RARG	MATS_only	ENSG00000172819	NA	30200	chr12	-	53623694	53623858	53624952	53625019	53621391	53621471	-50.9	-31.3	164	67	80	1094	2223	TTGGTGAGG	6.9	TCTCCTACCCTGGGTTTAAGACC	3.33	CGGGTAAGA	9.84	TTCTCTCTCTTTCTCCCTAGGAC	14.48	within_and_downstream	GGCTCACATGCAGCATCATTCCTTGGTGAGGATCA	1.54136550224442,1.7316287183488,1.83516510640417	2.32420449416207,2.61109986148385,2.76722100087434	1.74140897233428,1.95636517262999,2.07333885269495	2.68993351523146,3.02197377496847,3.20266161303841	NA	NA	0	0.706263	NA	NA	-50.9	1	NA	NA	-31.3	0.0449832	1.70272	2.56751	1.9237	2.97152
FAHD2B	MATS_only	ENSG00000144199	NA	50328	chr2	-	97757599	97757725	97760437	97760576	97757198	97757449	-47.9	-51.5	126	139	251	2712	150	CAGGTAAAA	8.59	TGTTTCCCCAATACCTACAGCAG	5.43	CAGGTAGAC	6.89	TCCTGTGTTTTTCTCTGCAGGCT	12.43	none	AGTTTCACCTTATGAAGTATAGCAGGTAAAATACA	13.1899	12.4506	13.5362	15.4352	NA	NA	9.7	0.747783	NA	NA	-47.9	0.0828991	NA	NA	-51.5	0.0021899	13.1899	12.4506	13.5362	15.4352
SLC2A8	MATS_only	ENSG00000136856	NA	15287	chr9	+	130164835	130165032	130162185	130162285	130165938	130166082	-47.7	-60.6	197	100	144	2550	906	CAGGTGAGA	9.22	CCTCCACCCACCCCCCGCAGGCT	9.7	CAGGTATAG	8.73	GCCAGTATCCGTCAGAGCAGAGC	-4.92	none	AGACCCCCCCATCGGGGCTGAGCAGGTGAGAGGCT	4.38217	3.80447	5.12233	7.44923	NA	NA	7.1	0.444074	NA	NA	-47.7	0.00574121	NA	NA	-60.6	0.00855267	4.38217	3.80447	5.12233	7.44923
VPS13B	MATS_only	ENSG00000132549	NA	28939	chr8	+	100519364	100519431	100515063	100515178	100519997	100520139	-47.7	-39.5	67	115	142	4186	566	GTGGTGAGA	5.46	GGTGAACTTATGTTTTCCAGGCC	4.99	CAGGTAAAT	8.76	CTCCTGTCCATCACTTCAAGCCT	4.21	none	TCTACAATGCAAAGAAAAATCTGTGGTGAGACCCA	3.6121324230296,3.59291077326891	2.680038925866,2.66577733090077	3.55446607599638,3.53555129270564	2.2518507947368,2.23986776581632	NA	NA	-22.7	0.404546	NA	NA	-47.7	0.00896221	NA	NA	-39.5	1	3.60252	2.67291	3.54501	2.24586
CAMTA2	both	ENSG00000108509	3519	12575	chr17	-	4885383	4885455	4886051	4886187	4884972	4885126	-16.2	-3.2	72	136	154	596	257	CAGGTAAGG	11.08	CCCAGCCTGTCTCCTGGCAGTGT	8.44	GAGGTAAGA	10.06	GTGTCCCCTTATACTCTCAGAAC	7.04	none	TCGGCGCTGCTACTGGCTGCTCCAGGTAAGGACGG	13.7817202720798,14.6517369197803,13.5828908369921,15.0385374392829	15.8062041094744,16.7952643661132,15.5781673642841,17.2386532296701	19.1942356194495,20.4218694075191,18.9173196068028,20.9609993236029	19.6204431918092,20.8395396857607,19.3373782652992,21.3896959451025	1.82	0.449303	-10.5	0.555755	-16.2	0.0018586	-46.8	0.104867	-3.2	0.682123	11.2	0.530245	14.2637	16.3546	19.8736	20.2968
SMC3	MATS_only	ENSG00000108055	NA	9365	chr10	+	112333464	112333503	112328695	112328771	112335093	112335161	-46.6	-11.4	39	76	68	4693	1590	ATGGTAGGT	8.6	TACTTTTTGAAATTTTCCAGTGG	5.94	TTGGTAAGT	10.47	AGTTGTTTTTGTATTTCCAGCAA	6.23	none	TCTGGAAAAAGTAACTTTTTTTATGGTAGGTGTTG	14.2109	10.7357	8.56167	7.58893	NA	NA	-18.1	1	NA	NA	-46.6	0.00273013	NA	NA	-11.4	1	14.2109	10.7357	8.56167	7.58893
GGNBP2	MATS_only	ENSG00000005955	NA	53835	chr17	+	34901467	34901666	34900780	34900946	34910660	34910741	-46.3	-29.8	199	166	81	521	8994	ACGGTGAgc	9.44	GCGGGGTTTGGCTGTTGCAGGCA	5.54	AGGGTGAGG	7.13	CGTTCTGTTTGCATTTTAAGATG	8.27	none	CCTCTACATAGACGACACCCTGACGGTGAgcgggc	23.7522	18.1601	22.2845	19.2339	NA	NA	0.3	0.823676	NA	NA	-46.3	0.0182646	NA	NA	-29.8	0.0160131	23.7522	18.1601	22.2845	19.2339
GGNBP2	MATS_only	ENSG00000005955	NA	60671	chr17	+	34901467	34901666	34900815	34900946	34910660	34910741	-46.3	-29.8	199	131	81	521	8994	ACGGTGAgc	9.44	GCGGGGTTTGGCTGTTGCAGGCA	5.54	AGGGTGAGG	7.13	CGTTCTGTTTGCATTTTAAGATG	8.27	none	CCTCTACATAGACGACACCCTGACGGTGAgcgggc	23.7522	18.1601	22.2845	19.2339	NA	NA	0.3	0.823676	NA	NA	-46.3	0.0182646	NA	NA	-29.8	0.0160131	23.7522	18.1601	22.2845	19.2339
DHX34	MATS_only	ENSG00000134815	NA	50591	chr19	+	47880171	47880246	47879699	47879817	47880356	47880463	-45	-20	75	118	107	354	110	GCCGTAAGC	5.13	GGAAGGGTGTCTCGCTGCAGGCA	3.67	GAGGTACAG	6.62	GGTCCTCCTCAACCTTTCAGACG	6.26	none	TGAGCCAGGCCACCAAAGCCATGCCGTAAGCATAC	8.26331	10.0726	9.66724	10.0397	NA	NA	23.1	0.326407	NA	NA	-45	0.000485092	NA	NA	-20	0.0983186	8.26331	10.0726	9.66724	10.0397
FBL	MATS_only	ENSG00000105202	NA	65313	chr19	-	40331256	40331427	40336930	40337054	40331053	40331155	-44.8	-55.4	171	124	102	5503	101	gTGGTAAGA	8.24	CTGTTTTGTTTCCCCCACAGGAT	12.84	CAGGTCAGG	7.2	GTTGTACCTCTCCTTTATAGGTG	9.71	none	ggcggtggaggaggaggaagaggTGGTAAGATTGG	121.509	120.845	94.2221	101.528	NA	NA	1.1	0.983189	NA	NA	-44.8	1.48e-12	NA	NA	-55.4	0	121.509	120.845	94.2221	101.528
RBMS1	both	ENSG00000153250	2671	65112	chr2	-	161138767	161138815	161141285	161141379	161137824	161137875	-5.3	-2.6	48	94	51	2470	892	AAGGTAAAT	8.88	TTAACTTTGGTCTGCCTTAGGTG	9.56	CAGGTTTGT	7.44	CAAAATCCTCCCTTTTCTAGGTG	10.67	upstream	CAAGTATCGGGGCTCTGCTATCAAGGTAAATCGCA	5.42134757465237,5.40996350368366	6.08299340870549,6.07021997410951	11.233832888247,11.2102434118134	9.88655158174859,9.86579120745187	-3.94	0.289428	-36.5	0.323828	-5.3	0.129579	-44.4	0.0342486	-2.6	0.663172	-19.2	0.605836	5.41566	6.07661	11.222	9.87617
PCNX	MATS_only	ENSG00000100731	NA	20408	chr14	+	71476350	71476441	71443658	71445365	71479716	71479919	-43.7	-37.5	91	1707	203	30985	3275	CTGGTATGT	8.14	AATAATCATTTATTTGCTAGGTA	6.32	GAGGTAAGT	11.08	TTTAGCTCTCTCTCCCACAGATT	12.28	upstream	CAGCAAGAAGAGCATCCAATATCTGGTATGTGTGA	5.71178	5.06975	5.59973	4.22499	NA	NA	15.3	0.0897803	NA	NA	-43.7	0.0770855	NA	NA	-37.5	0.0248404	5.71178	5.06975	5.59973	4.22499
NEK1	MATS_only	ENSG00000137601	NA	10440	chr4	-	170520250	170520348	170523158	170523255	170511876	170511960	-43.5	-4.6	98	97	84	2810	8290	CAGGTAAGT	10.86	GTAATGTTTATATTTTGTAGAAA	6.24	AAGGTCAGA	6.8	GATCTGATTTTTCTTCCTAGATT	8.7	none	AGGCGTTTTGTTTCAAGAGGATCAGGTAAGTTTGC	5.10679483181796,5.251809607109,4.98269944763221,4.98796935714847,5.10127098667808	3.50633088637305,3.60589818882573,3.42112686060804,3.42474518621418,3.50253820829152	3.45964281164683,3.55788433914905,3.37557330856402,3.37914345484489,3.45590063445738	2.64264997582612,2.71769181812408,2.57843344181238,2.58116049992112,2.63979151181766	NA	NA	-0.1	0.663512	NA	NA	-43.5	0.0232282	NA	NA	-4.6	0.447862	5.08611	3.49213	3.44563	2.63195
ANKRD49	MATS_only	ENSG00000168876	NA	31507	chr11	+	94231067	94231130	94229769	94230117	94231236	94231380	-43.5	29.1	63	348	144	950	106	CAAGTAAGT	10.08	CTTGTTCATTCTTAAATCAGTAG	3.34	CGGGTAAAA	5.16	TTTCTTTTTTTTCTTCTCAGCTT	9.78	none	TCATTTTAAAGTCATCTACTAACAAGTAAGTTTTT	8.20934	6.48099	7.48425	5.91213	NA	NA	-56.5	0.00377001	NA	NA	-43.5	0.00699096	NA	NA	29.1	0.246812	8.20934	6.48099	7.48425	5.91213
PLSCR3	MATS_only	ENSG00000187838	NA	64930	chr17	-	7296462	7296683	7296785	7296828	7296109	7296271	-42.7	3	221	43	162	102	191	GAGGTGGGC	6.32	CCCCGTGTCACCTCGGGCAGCGT	5.1	AAAGTAAGT	9.72	TGTCTGCTTCCCACTCCCAGATG	10.39	none	CTGCTGCCCCTGTGGCCTCCAGGAGGTGGGCGGAG	7.51542204627792,7.12312355377042,16.9395979965852	10.5576010839936,10.006503492369,18.3707738315453	14.1515512883067,13.4128526227016,22.2802220840986	18.672689732936,17.6979915738461,31.4741931672085	NA	NA	-4.1	0.39301	NA	NA	-42.7	0.0443835	NA	NA	3	0.606702	10.526	12.9783	16.6149	22.615
SEC16A	MATS_only	ENSG00000148396	NA	37178	chr9	-	139339503	139339563	139340096	139340171	139338274	139338352	-42	-8.4	60	75	78	533	1151	CAGGTACCT	8.16	GTGTTCTTGCTGTTTTGTAGCTT	8.88	GAGGTAAGG	10.28	GACTTCTCTGTGCTTCTCAGGCT	7.74	none	TGAAGTGAGCCAGCATTTTAATCAGGTACCTGCGG	12.1049	12.1333	15.7673	13.653	NA	NA	-46.8	7.45e-05	NA	NA	-42	0.00644636	NA	NA	-8.4	0.347328	12.1049	12.1333	15.7673	13.653
NEURL1B	MATS_only	ENSG00000214357	NA	13210	chr5	+	172110421	172111141	172068268	172068440	172113173	172113299	-41.9	-14.5	720	172	126	41981	2032	TCGGTGAGT	11.11	CCCTCCCTTTGTCCGCACAGAGA	8.53	CAGGTACGC	10.12	GGAATCTCTTTGGGCCTCAGGTA	5.45	none	GTCGCGGGCCAGCTGCGTCTCCTCGGTGAGTCCCC	5.87215	5.47146	2.88881	3.30018	NA	NA	4	0.604955	NA	NA	-41.9	0.00254931	NA	NA	-14.5	0.669441	5.87215	5.47146	2.88881	3.30018
RCSD1	MATS_only	ENSG00000198771	NA	2106	chr1	+	167609807	167609949	167599485	167599666	167610627	167611243	-41.3	-51.1	142	181	616	10141	678	caggtaatg	9.43	ctttttttttcctcctcaagaca	6.24	GAGGTAAAG	8.27	CCCTTCATTCATTTATTTAGAGA	6.68	within	tataggcgtgcaccaccacacccaggtaatgtttg	39.2631	48.2951	75.3543	79.4096	NA	NA	NA	NA	NA	NA	-41.3	0.0167686	NA	NA	-51.1	1	39.2631	48.2951	75.3543	79.4096
C1orf86	MATS_only	ENSG00000162585	NA	50000	chr1	-	2117442	2117688	2118276	2118645	2115916	2116952	-39.8	-71.4	246	369	1036	588	490	GGGGTGGGT	3.34	TTACGTCTCTCTTCCCCAAGCCA	5.71	TAGGTAAGT	9.66	ATTGCGGTGTGTCCCCACAGGTA	10.96	none	GGACAGCTGTGCCTTCACCTGAGGGGTGGGTGGAC	16.1104	12.4848	26.3494	27.6135	NA	NA	29.3	1	NA	NA	-39.8	1	NA	NA	-71.4	0.0319047	16.1104	12.4848	26.3494	27.6135
WDR85	MATS_only	ENSG00000148399	NA	23247	chr9	-	140470160	140470344	140470531	140470619	140469203	140469295	-39.8	-26.3	184	88	92	187	865	CACGTGAGT	9.3	TCTACATCCAACTCCAAGAGGAA	-8.46	GAGGTCAGT	7.7	AGTTTCTTCTTCTCCAGTAGAAG	3.57	none	TTCTCACTGATTATTGGAAAAGCACGTGAGTCCTG	16.8473	13.0885	15.607	13.0156	NA	NA	-27.1	0.717555	NA	NA	-39.8	0.00720305	NA	NA	-26.3	0.0766765	16.8473	13.0885	15.607	13.0156
NFAT5	both	ENSG00000102908	1239	1428	chr16	+	69602397	69602451	69598996	69600277	69660305	69660431	11.6	16.8	54	1281	126	2120	57854	AAGGTCAGC	7.09	ATGCTTTTTGTGTTTTTCAGATT	11.76	GAGGTGAGT	10.03	TCTCTTTCCCCTCCCCACAGAAT	13.16	downstream	TTTCATAGAGCTGGACTATTGGAAGGTCAGCAAAG	4.02384864943693,4.00510354339853,4.00841653324492,3.98891888491289,4.00751244711608,5.60183622320274	3.19470069104589,3.1798181722357,3.1824484925767,3.16696849916074,3.18173070102135,4.27258227116427	4.20364206357471,4.18405938959908,4.18752041030036,4.1671515689721,4.18657592783807,5.85929540474642	2.9904849977366,2.97655381809428,2.97901599977566,2.96452553805409,2.97834409179887,3.81664067762817	-7.13333	0.00868567	-28.7	0.470666	11.6	0.00120673	-39.8	0.583712	16.8	0.0169268	43.8	0.00505302	4.27261	3.36304	4.46471	3.11759
EFR3A	MATS_only	ENSG00000132294	NA	68102	chr8	+	133013015	133013245	133008636	133008744	133014005	133014054	-39.4	6.8	230	108	49	4271	760	CAGGCAAGT	3.1	TGTCTGCTCCGAATATCTAGAAC	5.5	GTGGTAAGT	10.36	CACTTATCACTTTTCTCTAGGTT	9.28	none	AAATTAGGGATGACCAGATTCCCAGGCAAGTACTC	7.25483	4.39365	8.07642	4.65551	NA	NA	-41.7	0.0883836	NA	NA	-39.4	0.0431852	NA	NA	6.8	0.755186	7.25483	4.39365	8.07642	4.65551
CENPK	MATS_only	ENSG00000123219	NA	36845	chr5	-	64824745	64824876	64824943	64825026	64824278	64824405	-37.8	-16.2	131	83	127	67	340	AAGGTATTA	7.04	ACATTTAAAGTTTTATTTAGATA	1.73	AAGGTTTGT	7.81	TAATTTTTTTAATCTATTAGAAT	4.97	none	AGGTTGAAACATTTTCTGAATCAAGGTATTAATTT	30.5409	23.4769	13.0504	10.2916	NA	NA	15.7	0.554965	NA	NA	-37.8	0.0158342	NA	NA	-16.2	0.0310129	30.5409	23.4769	13.0504	10.2916
NEURL1B	MATS_only	ENSG00000214357	NA	13209	chr5	+	172096787	172097333	172068268	172068440	172113173	172113299	-37.7	-4.4	546	172	126	28347	15840	TGGGTAGGT	6.86	CTGCCTGTGTCTTTCCGCAGACC	13.17	CAGGTACGC	10.12	GGAATCTCTTTGGGCCTCAGGTA	5.45	downstream	ATCACCGACGAGGTGCAGCTTCTGGGTAGGTCGCG	5.87215	5.47146	2.88881	3.30018	NA	NA	-7.1	1	NA	NA	-37.7	0.00522515	NA	NA	-4.4	1	5.87215	5.47146	2.88881	3.30018
PRR3	MATS_only	ENSG00000204576	NA	755	chr6	+	30529104	30529285	30525926	30525989	30529610	30529901	-37.3	-24.5	181	63	291	3115	325	actgtatga	1.14	agtggcatttctcgttatagccc	6.65	CAGGTGAGG	10.07	ctctctctctctctctcCAGCTC	13.33	none	agccagacataaaagaatgcagactgtatgattcc	7.71129094041707,7.85669989858716	10.7928248878144,10.9963411906974	6.47647200175055,6.59859643638397	8.94913865662018,9.11788925086354	NA	NA	9.9	0.242396	NA	NA	-37.3	0.00359843	NA	NA	-24.5	0.29976	7.784	10.8946	6.53753	9.03351
H2AFY	both	ENSG00000113648	203	59207	chr5	-	134686512	134686603	134696186	134696297	134681657	134681747	-3.6	-21.6	91	111	90	9583	4765	TAGGTAATG	7.57	CATTTGTTTACCTGTTATAGTTG	5.06	AAGGTAGGC	10.08	CCCACCCTGTCCTTGTCTAGGAA	10.52	downstream	GACTTCTACATCGGTGGTGAAGTAGGTAATGCCTA	93.1686734114706,93.4605857041436,93.0234000121804,95.1584562148232	105.620955550995,105.951882826872,105.456265911362,108.191558811797	165.426570886354,165.944878680254,165.168629247758,169.269319592145	213.16618918449,213.834072805955,212.833809471624,218.276594647812	-30.88	5.46e-05	-33.2	0.000165244	-3.6	0.603472	-37.2	0.212538	-21.6	0.348217	-16.4	0.0353388	93.7028	106.305	166.452	214.528
LINC01128	both	ENSG00000228794	6517	45208	chr1	+	783033	783186	764382	764484	787306	787490	-17.5	0.1	153	102	184	18549	4120	TGGGTaggt	6.86	ATCTCACTCACTTCTCTCAGTTT	6.75	caggtgcgt	9.73	CTTCATTCTTTCTCAAATAGGTT	9.39	none	CGCCATGCGATTCGCCCACTCTTGGGTaggtggag	6.83218	8.16204	9.69914	10.922	NA	NA	-25.9	0.593426	-17.5	0.00204641	-37.2	0.594236	0.1	0.967528	7	0.616114	6.83218	8.16204	9.69914	10.922
RALGPS2	MATS_only	ENSG00000116191	NA	40930	chr1	+	178802558	178802685	178790746	178790839	178846632	178846770	-36.9	-4.4	127	93	138	11719	43947	TAGGTGAGT	8.83	TTTTTCTGTTTGTTTTTTAGTTA	11.12	GCGGTGAGT	10.49	TTTATCTAATTGTATTTCAGGTA	10.48	none	ATGACACCTTGCATTCCCTATTTAGGTGAGTTATG	4.17079	3.35726	3.52647	2.34273	NA	NA	-5.1	0.37407	NA	NA	-36.9	0.0283056	NA	NA	-4.4	0.471595	4.17079	3.35726	3.52647	2.34273
NARF	MATS_only	ENSG00000141562	NA	10409	chr17	+	80436446	80436543	80426639	80426772	80436675	80436794	-36.8	-10.4	97	133	119	9674	132	CTGGTAAGG	9.68	CTTGTCTGTCGGCCTTGCAGGGA	10.22	TTGGTGAGT	9.27	TGGATCCCTTCTCTCCCCAGGCT	10.85	none	GTTTTGGGTCCAGCACGAGCTCCTGGTAAGGCCTG	103.803193670942,113.076265991966,124.100627740675,104.205018290493	72.1209170045986,78.3683105512757,86.0088228866743,72.2200292232052	119.005610333847,129.479833703061,142.103460008572,119.321665965129	101.160328007115,109.921578860323,120.638374632758,101.297827932111	NA	NA	13.6	0.00567629	NA	NA	-36.8	1	NA	NA	-10.4	0.0243425	111.296	77.1795	127.478	108.255
CEP44	MATS_only	ENSG00000164118	NA	56646	chr4	+	175237680	175237718	175237316	175237441	175238485	175239816	-36.8	1.2	38	125	1331	239	767	AATGTAAGT	8.62	TGTTGCTTTTTAAATTAAAGGAA	6.81	GAGGTAAGA	10.06	tattatttattatatttCAGGTT	9.8	none	AGAAAATGGAAAGGATGAAAAAAATGTAAGTAACA	10.0074907516508,7.11570329120419	7.8752781621238,5.42468156094044	6.86920421450276,4.913091089019	4.69191130257009,3.39920010380355	NA	NA	-5.9	0.153144	NA	NA	-36.8	0.049006	NA	NA	1.2	0.730489	8.5616	6.64998	5.89115	4.04556
IL17RC	MATS_only	ENSG00000163702	NA	1312	chr3	+	9960018	9960093	9959606	9959759	9960183	9960293	-36.3	-40.6	75	153	110	259	90	ATGGTGAGG	7.61	TTGCTCTTGGGTCCTTCTAGGGC	8.84	ATGGTGAGC	8.27	CCCTGCCCTGTTGCCCACAGCCT	9.58	none	TCAGGGGTGGAGGAGCCTAGGAATGGTGAGGAGAA	2.533215991488,2.52672888267497,2.472901325024,2.25786642719583,2.43326172301992,2.27784754602057,2.47911464493612	2.96707667354561,2.95947852585407,2.89643199084215,2.64456833946457,2.85000336460177,2.66797159910585,2.90370945815582	2.44542379761172,2.4391615087574,2.38719942147811,2.17961686308871,2.34893358611533,2.1989055078948,2.39319740997428	3.03618468071514,3.02840955989384,2.96389456926954,2.70616460672436,2.91638454534783,2.7301129660759,2.97134154054911	NA	NA	4.5	0.328732	NA	NA	-36.3	0.281265	NA	NA	-40.6	0.022348	2.42585	2.84132	2.34178	2.9075
TBC1D5	MATS_only	ENSG00000131374	NA	26951	chr3	-	17665340	17665405	17783972	17784056	17603510	17603634	-36.1	-26.9	65	84	124	118567	61706	TCTGTAAGA	4.08	TTTTTTTTTCTTTATTTCAGTGA	10.68	CAGGTAAAA	8.59	attaattaaattttttttagaga	5.82	none	ATTCTCAAAGCCTGAAAGAAAATCTGTAAGAATAA	10.3651	9.39199	6.76863	5.92788	NA	NA	-15.4	1	NA	NA	-36.1	0.0197087	NA	NA	-26.9	1	10.3651	9.39199	6.76863	5.92788
MRPL55	MATS_only	ENSG00000162910	NA	18002	chr1	-	228296137	228296175	228296849	228297007	228295935	228296022	-35.9	52.2	38	158	87	674	115	TTGGTGAGT	9.27	ttttggaaaaacctctacaggcg	2.97	CAGGTTGGC	5.52	TCTCTTCATTCTCTGCCTAGCAG	6.99	upstream	GTCCAAGGGTTGCTGGGAGAGGTTGGTGAGTGGCG	34.3593	28.534	28.9743	36.8689	NA	NA	-55.4	0.130317	NA	NA	-35.9	0.0158306	NA	NA	52.2	0.370221	34.3593	28.534	28.9743	36.8689
VASH2	MATS_only	ENSG00000143494	NA	25857	chr1	+	213124930	213125160	213123886	213124082	213134507	213134596	-34.9	-8.9	230	196	89	848	9347	AAGGTCAGT	8.68	CCGCTGCCCCCACCCCAAAGGCG	6	GAGGTAGGA	8.24	TCTTCTCTATTTTTCTGCAGCCT	9.58	none	CAGGAACGCCGCCTTCTTGGCAAAGGTCAGTGGCT	7.68644769331408,8.35701269639087,7.80157351881657	4.86238463151766,5.28657862794988,4.93521229742384	7.28542257879003,7.92100218706753,7.39454194341502	4.03937603429196,4.39177083497724,4.09987686888	NA	NA	21.5	0.703502	NA	NA	-34.9	0.0144408	NA	NA	-8.9	0.144089	7.94834	5.02806	7.53366	4.17701
NUCB2	MATS_only	ENSG00000070081	NA	69970	chr11	+	17358894	17359081	17352448	17352530	17370891	17371509	-34.4	-35.5	187	82	618	6364	11810	AAGGTGTGT	6.64	TTTTCATCTTTGTTTTATAGCCA	8.99	CACGTGTGT	3.78	ttatttcttatgttccacaggtc	10.37	none	TTTCTGTTGGAATTGGGATACTAAGGTGTGTTAAG	153.119	117.696	91.9645	83.5943	NA	NA	-11.5	0.491938	NA	NA	-34.4	0.00152866	NA	NA	-35.5	0.00242342	153.119	117.696	91.9645	83.5943
BBS9	MATS_only	ENSG00000122507	NA	53615	chr7	+	33195249	33195314	33192312	33192463	33217089	33217203	-34.4	NA	65	151	114	2786	21775	CAGGTAAGA	10.77	AAACTTTCTCTGTTTTTCAGAGG	8.79	TTCGTAAGT	9.77	CCTTTTTTTTTTTTCCTTAGGAA	12.41	none	AAACTTTGTGTCTACTCTGTCTCAGGTAAGAAATA	3.3038721347685,3.21723213123436,3.2912103866792,3.20522454676844	2.81038877932624,2.73668977287537,2.79961825513362,2.72647570305872	3.02845461127963,2.94903709524957,3.01684837235035,2.93803048752905	2.23460701372225,2.17600717944632,2.22604311356747,2.16788572941106	NA	NA	2.2	0.847775	NA	NA	-34.4	0.0440365	NA	NA	NA	NA	3.25438	2.76829	2.98309	2.20114
DNAJB14	MATS_only	ENSG00000164031	NA	29253	chr4	-	100849698	100849774	100851606	100851691	100845916	100845972	-34.4	NA	76	85	56	1832	3726	CTGGTATTG	3.14	CTTCATTTCCTCTACCCTAGCCT	6.41	CAGGTAGGA	9.79	gaataactttgatttttcagagc	6.92	none	AGAGCATTGATGCCTCTTTGTTCTGGTATTGATTA	14.4562	10.6802	15.1055	9.11506	NA	NA	NA	NA	NA	NA	-34.4	0.0469752	NA	NA	NA	NA	14.4562	10.6802	15.1055	9.11506
CSPP1	both	ENSG00000104218	5161	24639	chr8	+	68105698	68105837	68102884	68102994	68107616	68108498	-5.3	-6.4	139	110	882	2704	1779	CAGGTAAAT	8.76	GTTCTGTTTTCTAACTACAGGAT	8.41	ATTGTATGT	4.34	GTGTCCCTTGCCTCCTGTAGATG	9.53	none	TTTCACAATAAACCTATTAATACAGGTAAATGACC	6.22566	5.58025	5.31426	4.97768	18.0467	0.0130359	-3.7	0.481833	-5.3	0.293317	-34.1	0.0394845	-6.4	0.0694829	8	0.171961	6.22566	5.58025	5.31426	4.97768
VASH2	MATS_only	ENSG00000143494	NA	25860	chr1	+	213124680	213125160	213123976	213124082	213134507	213134596	-33.7	-11.4	480	106	89	598	9347	AAGGTCAGT	8.68	TGTGTCTCCGCTGATTTCAGGCA	7.76	GAGGTAGGA	8.24	TCTTCTCTATTTTTCTGCAGCCT	9.58	none	CAGGAACGCCGCCTTCTTGGCAAAGGTCAGTGGCT	7.68644769331408,8.35701269639087,7.80157351881657	4.86238463151766,5.28657862794988,4.93521229742384	7.28542257879003,7.92100218706753,7.39454194341502	4.03937603429196,4.39177083497724,4.09987686888	NA	NA	27.9	0.737982	NA	NA	-33.7	0.00353508	NA	NA	-11.4	0.062401	7.94834	5.02806	7.53366	4.17701
INO80	MATS_only	ENSG00000128908	NA	41194	chr15	-	41373217	41373271	41377566	41377781	41371898	41372102	-33.6	23.3	54	215	204	4295	1115	AAGGTAAAA	8.38	TTGTTTTTTAAATATTTTAGGCA	8.86	AAGGTAAGT	11	AATGCTGTTGTTGTTTTCAGCTT	9.28	none	CCTGTTTCTCACCAATAGCCGAAAGGTAAAATTGT	3.91869	4.03333	4.35091	3.97809	NA	NA	-13	0.523255	NA	NA	-33.6	0.756706	NA	NA	23.3	0.0272024	3.91869	4.03333	4.35091	3.97809
ZNF138	MATS_only	ENSG00000197008	NA	32295	chr7	+	64275953	64276031	64275295	64275422	64291828	64292580	-33.5	6.9	78	127	752	531	15797	CAGGTAGGT	10.28	TATTGCTATCTCTAAGCCAGACC	0.22	TGGGTGAGA	6.04	TTATTTTTTGTTTCTTTCAGCTC	11.66	none	GAGATGGTGGTAGCCAAACATTCAGGTAGGTGAGA	7.43574215022183,6.84755798454939,7.19986947853201	5.57215287730032,5.13138287412903,5.39539599685985	5.3772460642835,4.95189363462164,5.20667191446871	3.46182113234081,3.18798318405043,3.35200707707894	NA	NA	1.3	0.443849	NA	NA	-33.5	0.00900878	NA	NA	6.9	0.510619	7.16106	5.36631	5.1786	3.33394
ADAL	MATS_only	ENSG00000168803	NA	47131	chr15	+	43643138	43643239	43641104	43641243	43643948	43646094	-33.3	-44.8	101	139	2146	1895	709	TGTGTAAGG	4.52	TTTTTCCCCTTTTCATCTAGAAC	9.67	TGGGTAAGG	9.08	ATTCTTGTTTACGTTGGCAGACT	5.07	none	CATTGCCCATCCTTCTGTGATCTGTGTAAGGTGTT	3.11561	2.87372	2.37069	2.74017	NA	NA	-3.8	0.256514	NA	NA	-33.3	0.0318375	NA	NA	-44.8	1	3.11561	2.87372	2.37069	2.74017
KRIT1	MATS_only	ENSG00000001631	NA	69224	chr7	-	91873315	91873463	91874215	91874448	91871347	91871451	-33.3	11.6	148	233	104	752	1864	GAGGTGGGT	7.07	TTTCTTTTTGGGGCTTGCAGTCT	6.29	caggtaggt	10.28	TTTTTATTTGTTTTGTAAAGCAA	5.15	none	GATGTAGGAAGGTCTGTTGCATGAGGTGGGTTTTA	5.23983965106181,5.62724854291645,5.22629264057723,6.01560982264502,5.4984205662234	4.91782871514517,5.29725659701019,4.9198134678187,5.66284367484686,5.16051870843772	4.75767798943397,5.01921392880202,4.66158205338224,5.36561205388124,4.99246470247827	3.79250751196412,4.05976420941216,3.7704955891522,4.3399464710875,3.9796640145495	NA	NA	-23.1	0.180283	NA	NA	-33.3	0.00960926	NA	NA	11.6	0.628549	5.52148	5.19165	4.95931	3.98848
PCNXL2	MATS_only	ENSG00000135749	NA	55	chr1	-	233362971	233363117	233372590	233372726	233353776	233353930	-33.1	-27.8	146	136	154	9473	9041	TCGGTAAGC	9.86	TTTCTTTTGGTATCTAAAAGCAT	4.81	CGGGTACGT	9.5	TATGTATATATTTTGCACAGAAC	5.33	downstream	TGACCTTGCTGGCATTACTTGATCGGTAAGCCACT	3.9468	3.70205	5.48892	4.13851	NA	NA	-36.8	0.120275	NA	NA	-33.1	0.047692	NA	NA	-27.8	0.0285226	3.9468	3.70205	5.48892	4.13851
SHARPIN	MATS_only	ENSG00000179526	NA	12507	chr8	-	145153983	145154108	145154179	145154225	145153535	145153897	-33	-23.7	125	46	362	71	86	CAGGTGGGC	8.07	CCTGAGCTCCACCCCCTCAGCCA	2.45	CAGGTCAGT	8.94	AACTGTCTCTCTTCCCCCAGCCC	9.65	none	CTCCAGCCTGCCCAGTCCACTCCAGGTGGGCACGG	21.3838896535298,23.042308122703	23.2639792910487,25.0680723471462	26.9245943048269,29.0099046403875	39.1754710270274,42.2211604659239	NA	NA	3.1	0.541894	NA	NA	-33	0.000194494	NA	NA	-23.7	0.00245158	22.2131	24.166	27.9672	40.6983
REPIN1	MATS_only	ENSG00000214022	NA	46863	chr7	+	150067802	150067973	150066732	150066957	150068316	150068744	-33	3.5	171	225	428	845	343	CTGGTGAGT	10.1	tactgtgtcaccttgggcaggtc	6.36	AGGGTAGAG	0.88	CTGTGCTTTTCCACCCTCAGCAG	7.71	within	TAGGGAGCAGTGGCCACATTTTCTGGTGAGTCCTG	48.604559304041,37.9818860686254,45.5658151479942,43.8356429446226	55.8195188932965,46.498962500604,52.329697377391,50.3426948949567	36.017395643278,28.987547391414,33.7655976207427,32.4834895701374	41.3412319602481,34.8464720533564,38.7565891032449,37.2849689216211	NA	NA	-31	0.00977025	NA	NA	-33	0.00106966	NA	NA	3.5	0.588367	43.997	51.2477	32.8135	38.0573
HDAC10	MATS_only	ENSG00000100429	NA	34960	chr22	-	50687259	50687319	50687756	50687883	50687090	50687180	-32.7	-10.5	60	127	90	437	79	GAGGTGAGG	8.41	CACTCCGGCCTGGCCTGTAGTTT	4.13	CAGGTGccc	5.77	ACACATGGCTCTGGTTCCAGGGG	6.06	none	TGACTCAGCCATCGGGGACCCTGAGGTGAGGGCCT	17.2869577043106,17.6789522100772	22.1431725048527,22.6452852600647	26.8818133014591,27.4913782289299	32.6681370555685,33.4089111384612	NA	NA	24.2	0.227868	NA	NA	-32.7	0.0160363	NA	NA	-10.5	0.115739	17.483	22.3942	27.1866	33.0385
POLB	both	ENSG00000070501	1096	70938	chr8	+	42210036	42210086	42202477	42202537	42213033	42213085	-28	-10.6	50	60	52	7499	2947	AAGGTGAGT	10.47	TAATGCTTTTGTTTTTGTAGTCC	6.5	TTGGTAAGT	10.47	TTTATTTATCTTCTATACAGATC	9.14	none	GATGAAGGAATTAAAACACTAGAAGGTGAGTATGA	14.9739	11.6765	16.4411	14.7775	-0.566667	0.833887	-50.8	1	-28	0.00195765	-32.5	1	-10.6	0.213908	18.3	1	14.9739	11.6765	16.4411	14.7775
ODF2L	MATS_only	ENSG00000122417	NA	33101	chr1	-	86822126	86822285	86824469	86824574	86820456	86820542	-32.4	-33.9	159	105	86	2184	1584	CAGGTGTCC	3.16	TCCCTACTGCCACAACTCAGATG	3.84	AAGGTACGT	10.75	AACTTTTTTTTTTCTTTTAGGTT	12.2	none	CACCATTAGGGAGCTTCAGGGCCAGGTGTCCAGCC	6.71012451296989,7.38412191222681,7.2296200828945,6.64716911136079	3.77472057004865,4.25298433492252,4.16399692820336,3.73930557156536	5.95030299868719,6.57373702533577,6.43619130114043,5.89447635728075	3.22409417068694,3.56962409888142,3.49493499435937,3.19384523224342	NA	NA	-23.6	0.0660178	NA	NA	-32.4	1	NA	NA	-33.9	0.0258862	6.99276	3.98275	6.21368	3.37062
ZCCHC10	MATS_only	ENSG00000155329	NA	62023	chr5	-	132335823	132335865	132342450	132342612	132332676	132334542	-32.4	1.3	42	162	1866	6585	1281	AAGGTATGT	9.79	TTCCCCCTCGTGTTTATCAGCAT	7.79	AAGGTAGGT	10.29	AACTCTGTATTGTCTAATAGGTC	8.84	none	TAGAAAGAAAGGCCAAGAAAAAAAGGTATGTGTGG	6.60317	6.38189	6.33858	6.75431	NA	NA	7.2	0.603493	NA	NA	-32.4	0.00249051	NA	NA	1.3	0.904578	6.60317	6.38189	6.33858	6.75431
WBP1	MATS_only	ENSG00000239779	NA	36492	chr2	+	74686604	74686689	74686006	74686225	74686769	74686872	-32.2	10.6	85	219	103	379	80	TGTGTATGT	3.3	atcctcttccacgttgacagccc	5.34	CTGGTTGGG	0.67	AAGTGCCTCCTTGCCCGCAGCTT	7.35	none	aacTTGGTTCACAGGGTGGGATTGTGTATGTGCAT	41.1686305982291,33.5036991377874	48.8425821312821,41.0886582858175	49.7977823295154,41.2155046331346	58.4010947636629,48.9311557722003	NA	NA	-50.4	0.0612626	NA	NA	-32.2	0.0121927	NA	NA	10.6	0.648608	37.3362	44.9656	45.5066	53.6661
DCAF17	MATS_only	ENSG00000115827	NA	37496	chr2	+	172314480	172314585	172309633	172309723	172325397	172325540	-32.1	1.1	105	90	143	4757	10812	CAGGTAGAG	7.1	TCTGTCTTTCCCCCCGCCAGATT	10.51	AAGGTAAGA	10.57	TCCTTTTCCTGTCTCTACAGACA	11.33	none	TAGCTTCCAAACCATCGCTGAACAGGTAGAGAAAA	3.49693376578591,3.43887562042596,3.37632915238115	3.05932565801077,3.00853293911684,2.95381356857011	2.75149688721523,2.70581492211816,2.6566014043171	2.19057974550541,2.15421045577751,2.11502955181176	NA	NA	-0.1	0.6001	NA	NA	-32.1	0.0237476	NA	NA	1.1	0.734732	3.43738	3.00722	2.70464	2.15327
OSBPL8	both	ENSG00000091039	3201	59516	chr12	-	76853638	76853675	76881289	76881398	76844631	76844768	-5	1.2	37	109	137	27614	8870	CAAGTAAGT	10.08	CAATTACCCTGCCTTAAAAGCTT	3.87	TCGGTGAGT	11.11	TTTTCCCTTCTTTCCTTGAGCTG	1.39	none	AGCAAAGATGTCCTTGGGCCATCAAGTAAGTAGCT	8.56090160105458,8.61563425896265	6.07246733600997,6.11129061571205	7.43265791005206,7.4801773351893	4.36455776118298,4.39246181358248	NA	NA	-44.5	0.0145702	-5	0.469161	-31.8	0.00403669	1.2	0.899435	-8.1	0.366743	8.58827	6.09188	7.45642	4.37851
DNTTIP2	MATS_only	ENSG00000067334	NA	62622	chr1	-	94341200	94341339	94341823	94343418	94338674	94338770	-31.4	3.9	139	1595	96	484	2430	GAGGTAAGT	11.08	AGTGATGATTTCTTTTTCAGTCT	6.67	ACTGTAAGT	8.59	CCAATTTTATGTTTTTATAGCTT	7.29	none	GATCAAGGAGAAAAAGAAAAATGAGGTAAGTTAAT	5.28058	4.73945	5.3419	5.88325	NA	NA	-0.7	0.804396	NA	NA	-31.4	0.0245223	NA	NA	3.9	0.362601	5.28058	4.73945	5.3419	5.88325
PARP11	MATS_only	ENSG00000111224	NA	70572	chr12	-	3938075	3938196	3939055	3939184	3935323	3935399	-31	11.8	121	129	76	859	2676	CAGGTATGT	9.8	CTTTCTGGTTTGTCTTAAAGCCG	7.37	CAGGTACCT	8.16	TATCTTGTCTTTGTATACAGAAA	7.78	none	TTCAGCTACAAGATAGACTTTGCAGGTATGTTTTT	2.46199	2.47902	2.70917	1.60938	NA	NA	-18.6	0.156603	NA	NA	-31	0.048628	NA	NA	11.8	0.435847	2.46199	2.47902	2.70917	1.60938
TBC1D13	both	ENSG00000107021	341	25323	chr9	+	131553013	131553054	131550612	131550686	131553658	131553720	-23.5	-12	41	74	62	2327	604	AAGGTGGGT	8.23	TTTGCCTGCTGTGTCCACAGGCA	11.26	GTGGTAAGA	8.24	GCCCTTCTCCCTCTGTGCAGATT	11.49	none	CGGACTGCGGTGCCTCTGCTGGAAGGTGGGTGTGC	4.9256	4.87977	6.8909	9.35579	NA	NA	12.8	0.0327939	-23.5	0.146028	-30.8	1	-12	0.386957	-27	0.0172499	4.9256	4.87977	6.8909	9.35579
ZNF638	MATS_only	ENSG00000075292	NA	25659	chr2	+	71655660	71655781	71654479	71654544	71658456	71658558	-30.6	-16.2	121	65	102	1116	2675	AAGGTAAAG	9.06	TTACTAGAGCAATAAATTAGGAC	-5.1	CAGGTAGAT	7.25	TTTTCCTCGAAAAATTTTAGTTG	4.52	none	GAAGAGGCCTTCCAGATGAGTGAAGGTAAAGCAGG	13.2359941107772,13.3652558731364,12.6236113671454,13.256344655228	10.9445713597461,11.0514552530439,10.4382046614035,10.9613988064862	13.6844117924924,13.8180527695389,13.051282344992,13.7054517860233	10.1431724142315,10.242229903318,9.67388361732127,10.1587676977713	NA	NA	2	0.474305	NA	NA	-30.6	0.00795307	NA	NA	-16.2	0.0151046	13.1203	10.8489	13.5648	10.0545
WNK1	MATS_only	ENSG00000060237	NA	37938	chr12	+	974275	974530	971248	971436	977031	978270	-30.6	-5.3	255	188	1239	2839	2501	ACTGTATGT	5.19	TGTGTTTGTTTTGTGTTGAGCCT	1.05	GTGGTAAGT	10.36	TCTTATTCATGTTGATACAGCCT	5.1	upstream_and_within	CCTGCCTTCCCTCTTTGTCAGTACTGTATGTAACT	13.7310006854506,13.7604032565115,14.755702229141,15.8865471465782	10.7320176696231,10.7549984355109,11.5329145106397,12.4167719885874	16.6833831468128,16.7191077359923,17.9284117398586,19.3024062118873	10.2692564068991,10.2912462493122,11.0356188253244,11.8813646438289	NA	NA	21.1	0.474387	NA	NA	-30.6	0.0108812	NA	NA	-5.3	0.13533	14.5334	11.3592	17.6583	10.8694
PGGT1B	MATS_only	ENSG00000164219	NA	60387	chr5	-	114566672	114566718	114572086	114572219	114557520	114557705	-30.5	-3	46	133	185	5368	8967	ATGGTAAGA	9.48	ACAATGTTTTTCTTTTTCAGTCC	10.57	ATGGTGAGT	10.13	TGTGTGGTTTTGATTAACAGGAG	7.69	none	CAGGGAGCTGGACTTGAATCTCATGGTAAGACATC	4.33841	3.24376	4.52784	3.32457	NA	NA	8	0.135725	NA	NA	-30.5	0.0298649	NA	NA	-3	0.447039	4.33841	3.24376	4.52784	3.32457
CSDA	both	ENSG00000060138	127	41946	chr12	-	10862506	10862713	10865809	10865932	10856649	10856747	-0.6	-7.5	207	123	98	3096	5759	CAGGTAAAA	8.59	CTGTTTCTTTGCTTCGCTAGTAC	6.28	AATGTACGT	6.58	AGCTCTCATTGCCTCTCCAGGCT	7.21	none	CTTACCCCATCCCAACAGAATACAGGTAAAATTGC	28.2714953171675,31.5834361947304	31.9983485127928,35.7468817001997	44.5173109898164,49.7324119376896	46.193517393806,51.6049820800073	6.76	0.0807938	-8.2	0.444567	-0.6	0.866132	-30.4	0.00279811	-7.5	0.243921	-12.8	0.0190628	29.9275	33.8726	47.1249	48.8992
C8orf59	MATS_only	ENSG00000176731	NA	70508	chr8	-	86131464	86131592	86132534	86132650	86129614	86129731	-29.9	-22.2	128	116	117	942	1733	AAGGTAAAA	8.38	CTACTGCATTCTTTTTTAAGTAG	4.69	CTGGTGAGA	7.54	GAATTTATTTTCTTTTCTAGACA	8.98	none	CAGTCAAGACTACGACTGAGCAAAGGTAAAAAAGG	24.0224363900043,27.3792833964678,26.2062942436411,24.0916653133185	15.0266099345902,17.1263982223932,16.3926653831893,15.0699142859867	18.5115388763436,21.0983041341733,20.1944060469203,18.564886250627	14.3410019973708,16.3449848092305,15.6447294516773,14.3823305333863	NA	NA	-11.6	0.168938	NA	NA	-29.9	6.45e-08	NA	NA	-22.2	0.00335676	25.4249	15.9039	19.5923	15.1783
BRCA2	MATS_only	ENSG00000139618	NA	13503	chr13	+	32918694	32918790	32910401	32915333	32920963	32921033	-29.8	22.7	96	4932	70	3361	2173	ATGGTAAAA	4.79	TATGAAATATTTCTTTTTAGGAG	8.23	TGGGTAAGT	10.24	ATAAAATAATTGTTTCCTAGGCA	5.54	none	AAGGCTTCAAAAAGCACTCCAGATGGTAAAATTAG	3.00631	2.58873	1.31513	1.14503	NA	NA	-0.1	1	NA	NA	-29.8	0.0293098	NA	NA	22.7	1	3.00631	2.58873	1.31513	1.14503
C19orf55	MATS_only	ENSG00000167595	NA	27387	chr19	+	36255967	36256077	36255754	36255837	36257668	36258967	-29.6	-5.9	110	83	1299	130	1591	CCGGTAAgg	10.19	TCCTCCTCCTCCTCCCTCAGCCC	8.99	CAGGTGCCC	5.77	CTCTCTACCTCCCCCTACAGcat	10.36	none	AAGGGCCTTGGCCCCAGGGCACCCGGTAAgggctg	10.4547	14.5144	11.3071	12.3056	NA	NA	0.2	0.989459	NA	NA	-29.6	0.0123177	NA	NA	-5.9	0.136973	10.4547	14.5144	11.3071	12.3056
MARK1	both	ENSG00000116141	5666	47845	chr1	+	220831131	220831176	220826442	220826694	220835153	220835800	-13.9	-24.5	45	252	647	4437	3977	AAGGTGAGG	9.16	AACCTTCACTTTGTTTTGAGGGA	-3.94	CAGGTCAGT	8.94	CCTTTGCCCTCTTGTTCCAGAAG	9.67	none	CCAGTGGCAGAACCGACACCTCAAGGTGAGGAGCC	1.09727	1.08001	1.2838	0.769418	3.67333	0.262776	-31.2	1	-13.9	0.110208	-29.5	1	-24.5	0.0243552	-33.2	1	1.09727	1.08001	1.2838	0.769418
FGGY	MATS_only	ENSG00000172456	NA	67679	chr1	+	59805629	59805741	59762683	59762822	59811918	59812070	-29.5	-13.7	112	139	152	42807	6177	AAGGTAAGA	10.57	TTTATTTGTTTTTAAAACAGAAA	6.36	TGGGTGAGG	6.74	CTCCCTCTCGTTTCTGCTAGGGG	9.95	none	CACCCATTACCAGTCAACCAGGAAGGTAAGACCAT	5.23823393939925,5.42549950227748	5.23207861204006,5.41912412349333	6.01670667472373,6.23180244462448	5.75158100624205,5.95719859931525	NA	NA	-3	0.464856	NA	NA	-29.5	0.0450513	NA	NA	-13.7	0.289533	5.33187	5.3256	6.12425	5.85439
FCER1G	MATS_only	ENSG00000158869	NA	5219	chr1	+	161187775	161187867	161185086	161185160	161188030	161188066	-29.4	-51.8	92	74	36	2615	163	AAGGTAGCG	6.91	GGCATCCTCTATCCCCTCAGCGG	6.9	CAGGTAAGA	10.77	TAACCTTTCCCCCATTCCAGATC	10.75	none	CACCCTCCTCTACTGTCGACTGAAGGTAGCGCTGG	1.71099	2.42036	9.75707	9.24851	NA	NA	-2.1	0.721714	NA	NA	-29.4	1	NA	NA	-51.8	0.02912	1.71099	2.42036	9.75707	9.24851
STAG3L2	MATS_only	ENSG00000160828	NA	7115	chr7	-	74299833	74299941	74300249	74300329	74299454	74299569	-29.3	-12.5	108	80	115	308	264	GAAGTGAGT	7.97	TTCTGCTTTTCTGTGGGCAGGAA	8.8	TAAGTGAGT	6.43	CCTTGTGTCCATTCCACCAGACT	7.45	none	CTGTGGGTGAATTTCTGTACTGGAAGTGAGTGGGG	44.5152	52.9982	57.8068	61.1948	NA	NA	2.7	0.798082	NA	NA	-29.3	0.00144094	NA	NA	-12.5	0.133017	44.5152	52.9982	57.8068	61.1948
KDM6A	MATS_only	ENSG00000147050	NA	33396	chrX	+	44921891	44921993	44920568	44920664	44922666	44923062	-29	5.6	102	96	396	1227	673	CAAGTGTGT	3.84	TCTTTTTGTTCTTCTTCTAGCAT	9.83	CAGGTATGT	9.8	TTCCTTTGTTTTTTTGACAGATG	10.01	none	GTTTGTCTTAATGCAACAACACCAAGTGTGTATAG	6.94697	5.06008	5.54775	3.22288	NA	NA	-29.5	0.219245	NA	NA	-29	0.00216151	NA	NA	5.6	1	6.94697	5.06008	5.54775	3.22288
REPIN1	MATS_only	ENSG00000214022	NA	46864	chr7	+	150067848	150067973	150066759	150066957	150068316	150070210	-28.9	2.2	125	198	1894	891	343	CTGGTGAGT	10.1	ttgcttcatctgttaaacaggga	7.22	AGGGTAGAG	0.88	CTGTGCTTTTCCACCCTCAGCAG	7.71	upstream_and_within	TAGGGAGCAGTGGCCACATTTTCTGGTGAGTCCTG	45.5658151479942,43.8356429446226	52.329697377391,50.3426948949567	33.7655976207427,32.4834895701374	38.7565891032449,37.2849689216211	NA	NA	-21.1	0.0400044	NA	NA	-28.9	0.00932043	NA	NA	2.2	0.724504	44.7007	51.3362	33.1245	38.0208
WIPF1	MATS_only	ENSG00000115935	NA	52450	chr2	-	175439931	175440099	175446037	175446167	175437051	175437174	-28.5	-45.9	168	130	123	5938	2757	ATGGTAAGG	9.33	TTCTTCTACAGAACCTAAAGGAG	-4.19	ACAGTAAGT	9.49	TTTGTTTTCCTGTTCTTCAGATT	10.29	none	AGATCCACGGCCAACAGGGATAATGGTAAGGAGAG	6.36041521244513,5.70806685837452	8.078082495322,7.27389962371548	10.717140703866,10.2755207467513	13.041805192625,12.5108955378823	NA	NA	NA	NA	NA	NA	-28.5	0.93561	NA	NA	-45.9	0.00132397	6.03424	7.67599	10.4963	12.7764
C19orf55	MATS_only	ENSG00000167595	NA	27394	chr19	+	36255934	36256077	36255754	36255837	36257668	36257856	-28.5	-5.5	143	83	188	97	1591	CCGGTAAgg	10.19	CTCCTGCCTTCTCCCTGCAGCAA	12.13	CAGGTGCCC	5.77	CTCTCTACCTCCCCCTACAGcat	10.36	none	AAGGGCCTTGGCCCCAGGGCACCCGGTAAgggctg	10.4547	14.5144	11.3071	12.3056	NA	NA	0.2	0.927875	NA	NA	-28.5	0.0151814	NA	NA	-5.5	0.183054	10.4547	14.5144	11.3071	12.3056
ATXN3	MATS_only	ENSG00000066427	NA	54404	chr14	-	92562436	92562481	92563017	92563182	92560089	92560175	-28.4	-17.3	45	165	86	536	2261	CAGGTAAGT	10.86	CTACCTGTCAAAATTAACAGCAG	4.24	CAGGTACTG	9.04	GTTGCTATTTTTCTTAACAGGTT	9.54	none	TGACAGTGGTTTTTTCTCTATTCAGGTAAGTAGTC	4.64498954299644,4.28895157565815,4.28134929812375,4.24746992208349,4.25370336781593,4.24063419872681,4.56308796415267,4.15432632195754,4.21412252810377,4.1513512959464,4.23877372744922,4.23382044234557,4.18673042731442,4.50213338743364,4.31770218207921,4.2393937031297,4.3455374435229,4.2462254245968,4.20617250737161,4.61173186130434	3.57635832024729,3.3022308254429,3.29637753594433,3.27029248510303,3.27509185769638,3.26502939551472,3.5132991055326,3.1985776004505,3.24461702796498,3.19628701208008,3.26359694623327,3.25978321915617,3.22352678294715,3.46636780340837,3.32436703684539,3.26407428965089,3.34579848850721,3.26933429802858,3.23849599743769,3.55075193609278	4.79820987055433,4.43042758097943,4.42257453356854,4.38757760730642,4.39401667042251,4.38051639974528,4.7136066738443,4.29136155829998,4.35313021114554,4.28828839763091,4.37859455868075,4.37347788376555,4.32483455037686,4.65064144023905,4.46012655925205,4.37923498497279,4.48887999883943,4.38629205863741,4.34491794982716,4.76385514594415	3.36818226147839,3.11001144001556,3.10449886434641,3.079932196897,3.08445220305623,3.07497546622168,3.30879365737172,3.01239176030173,3.05575128113189,3.01023450467275,3.07362639830728,3.07003466427478,3.03588867710894,3.2645941770154,3.13085912581933,3.07407595606628,3.15104307520617,3.07902978488502,3.04998654935788,3.34406639803105	NA	NA	5	0.280267	NA	NA	-28.4	0.0141249	NA	NA	-17.3	0.0166632	4.30841	3.31721	4.45053	3.12412
PCCA	MATS_only	ENSG00000175198	NA	61811	chr13	+	100755136	100755214	100741368	100741479	100764094	100764142	-28.4	17.3	78	111	48	13657	8880	AAAGTAAGT	9.72	TTGCTTTCCTTTTTTTGTAGCAT	9.03	AAGGTGAGG	9.16	TGTGTTTTTTCTCTCTTCAGACT	11.22	none	AGTGGGATATGATCCTAATGAAAAAGTAAGTATTT	5.02654799940819,4.89916564865891,4.75012706808348	4.52176688958867,4.40717665867794,4.27310498185388	6.77526384371809,6.60356568516852,6.40267718148554	5.10590189947358,4.97650856895595,4.82511712263046	NA	NA	1.5	1	NA	NA	-28.4	0.0292873	NA	NA	17.3	1	4.89195	4.40068	6.59384	4.96918
ZNF3	MATS_only	ENSG00000166526	NA	59900	chr7	-	99677158	99677279	99679257	99679326	99674925	99675056	-28.1	10.4	121	69	131	1978	2102	CAGGTAAAG	9.65	TTTTCCCCTTAATCACACAGCAT	6.37	AGGGTGAGT	9.25	TTGAACTTTTGCTTCTGCAGTGC	8.26	none	AAGAAGGAAGGAAAGAATCAGGCAGGTAAAGCTTT	6.63466235975901,16.349718090455	5.88553654125928,14.7572003388303	7.61180602296489,18.4012600914917	6.84303117520498,17.1940163142648	NA	NA	-9.8	0.211311	NA	NA	-28.1	0.0233405	NA	NA	10.4	0.177896	11.4922	10.3214	13.0065	12.0185
SETD8	both	ENSG00000183955	631	14130	chr12	+	123873979	123874101	123868319	123868755	123875176	123875333	-9	-2.4	122	436	157	5224	1075	GGGGTAAGC	7.79	CCCCGGGTCCCCTTCTCCAGGCA	8.73	GAGGTATTT	7.63	ATATGCTTTTGTCTTTTTAGGAG	10.99	none	CCCGGGGAGGCCCCGCACCGACGGGGTAAGCAGGC	25.432	19.982	17.4336	17.2638	7.97333	0.134731	16.7	0.65389	-9	0.0277689	-28	0.00131165	-2.4	0.621899	-54.6	0.000154631	25.432	19.982	17.4336	17.2638
BBIP1	MATS_only	ENSG00000214413	NA	38139	chr10	-	112677878	112677971	112678878	112679032	112661295	112661370	-27.8	-7.9	93	154	75	907	16508	CAGGTAAAA	8.59	TATCATACATTATCTTGTAGTTT	6.44	TCTGTAAGT	7.96	ATACTGATTTCTCATTGAAGGAA	6.42	none	GCAGCAAAAAGACCAGAACTTTCAGGTAAAATTGA	5.63567168993336,5.2620228490045,5.98893325517501,5.88313036187095	5.8553481365974,5.46713459882469,6.21339730021934,6.11245265817604	5.67050030979691,5.29454230783825,6.06685583442188,5.91948828373984	5.51911453525205,5.1531935124334,5.89869030789984,5.76145525847133	NA	NA	6.3	0.773994	NA	NA	-27.8	0.00334749	NA	NA	-7.9	0.107696	5.69244	5.91208	5.73785	5.58311
RSU1	MATS_only	ENSG00000148484	NA	10952	chr10	-	16858971	16859083	16859313	16859527	16824032	16824083	-27.8	-2.4	112	214	51	230	34888	TCTGTGAGT	7	TTTGTTGTTGTTCGGTGCAGACC	8.2	GTGGTGAGT	8.95	TTTTTTTCTTTTCTTTTTAGTTA	10.87	none	AACATGCTGGATGTCAACGGCCTCTGTGAGTTCTC	6.17656815713808,5.99224211567806	5.13636221991198,4.98307882832388	7.49973912348128,7.27592596551967	5.07644520704003,4.92494990643026	NA	NA	0.7	0.51892	NA	NA	-27.8	0.0382712	NA	NA	-2.4	0.67122	6.08441	5.05972	7.38783	5.0007
C8orf59	MATS_only	ENSG00000176731	NA	70510	chr8	-	86131551	86131592	86132534	86132604	86129614	86129731	-27.6	-14.5	41	70	117	942	1820	TCAGTTAAG	-15.03	CTACTGCATTCTTTTTTAAGTAG	4.69	CTGGTGAGA	7.54	GAATTTATTTTCTTTTCTAGACA	8.98	none	GGCGTTCAAAAGCATTGCTGTTTCAGTTAAGTAGT	24.0224363900043,27.3792833964678,26.2062942436411,24.0916653133185	15.0266099345902,17.1263982223932,16.3926653831893,15.0699142859867	18.5115388763436,21.0983041341733,20.1944060469203,18.564886250627	14.3410019973708,16.3449848092305,15.6447294516773,14.3823305333863	NA	NA	-12.5	0.195107	NA	NA	-27.6	6.11e-07	NA	NA	-14.5	0.246115	25.4249	15.9039	19.5923	15.1783
ARHGAP26	MATS_only	ENSG00000145819	NA	51191	chr5	+	142587008	142587038	142586762	142586873	142593561	142593653	-27.6	1.2	30	111	92	135	6523	CAGGTAAAA	8.59	CTGCACTTGCTTTTTGACAGGCC	6.94	CAGGTCTGT	6.84	AAACTCCTGTTTTCACACAGCAC	6.15	none	AAGAAGCGGTACATGAAGACTCCAGGTAAAATCTC	2.58409730419684,2.6321342639977	2.01594652757242,2.05342187424316	3.63255521517275,3.70008243582434	2.47959006846522,2.52568429574066	NA	NA	-25.2	0.0632461	NA	NA	-27.6	0.0346664	NA	NA	1.2	1	2.60812	2.03468	3.66632	2.50264
MPHOSPH9	MATS_only	ENSG00000257076	NA	14888	chr12	-	123712009	123712163	123714807	123715069	123707584	123707674	-27.4	-14.6	154	262	90	2644	4335	GAGGTATCT	7.27	AATTATTTATGTTTCAACAGAAG	6.86	TAGGTAAGA	9.14	aatattttataatttaataGACC	5.04	none	TTCGGAACTTTGGAAAAACTGTGAGGTATCTAATT	21.8806	15.4314	11.3264	7.73401	NA	NA	19.6	0.0570713	NA	NA	-27.4	0.0111114	NA	NA	-14.6	0.0265867	21.8806	15.4314	11.3264	7.73401
MPHOSPH9	MATS_only	ENSG00000257076	NA	14898	chr12	-	123712092	123712163	123714807	123715069	123707584	123707674	-27.3	-34	71	262	90	2644	4418	AAGGTACAG	8.04	AATTATTTATGTTTCAACAGAAG	6.86	TAGGTAAGA	9.14	aatattttataatttaataGACC	5.04	none	AAGACCAGACCATCTGTAATTCAAGGTACAGTTGA	21.8806	15.4314	11.3264	7.73401	NA	NA	29	0.0623159	NA	NA	-27.3	0.0451414	NA	NA	-34	1	21.8806	15.4314	11.3264	7.73401
MPHOSPH9	both	ENSG00000257076	1257	14884	chr12	-	123712009	123712119	123714807	123715069	123707584	123707674	-13.1	-10.6	110	262	90	2688	4335	GAGGTATCT	7.27	TGGGGTATCCTCTTTCTCAGGGA	6.86	TAGGTAAGA	9.14	aatattttataatttaataGACC	5.04	none	TTCGGAACTTTGGAAAAACTGTGAGGTATCTAATT	21.8806	15.4314	11.3264	7.73401	3.55333	0.0536351	22	0.13321	-13.1	0.00113392	-27.3	0.00763853	-10.6	0.0160808	-18.5	0.0134084	21.8806	15.4314	11.3264	7.73401
YBEY	MATS_only	ENSG00000182362	NA	55039	chr21	+	47711247	47711376	47706783	47707037	47716075	47716144	-27.2	1.4	129	254	69	4210	4699	ACTGTAAGC	4.95	TACATTTCCTCATTTTTTAGCAT	8.92	GAGGTAAAA	7.3	GTTTAAAATTATTCTGACAGGTG	7.18	none	TGAAGATTACAATGACGTCCTGACTGTAAGCGGGG	13.1100437003379,6.47455443431699	15.7980896524752,7.55522771865463	12.4915778919009,5.89696814569139	13.4424948363837,5.70574107515097	NA	NA	-9.5	0.0774499	NA	NA	-27.2	0.0389358	NA	NA	1.4	0.605182	9.7923	11.6767	9.19427	9.57412
ZNF3	MATS_only	ENSG00000166526	NA	59897	chr7	-	99677162	99677279	99679257	99679371	99674925	99675056	-27.2	11.8	117	114	131	1978	2106	CAGGCAGGT	2.53	TTTTCCCCTTAATCACACAGCAT	6.37	AGGGTGAGT	9.25	TTGAACTTTTGCTTCTGCAGTGC	8.26	none	TTCAAAGAAGGAAGGAAAGAATCAGGCAGGTAAAG	6.63466235975901,16.349718090455	5.88553654125928,14.7572003388303	7.61180602296489,18.4012600914917	6.84303117520498,17.1940163142648	NA	NA	-10.9	0.209937	NA	NA	-27.2	0.0305846	NA	NA	11.8	0.137389	11.4922	10.3214	13.0065	12.0185
ARMC8	MATS_only	ENSG00000114098	NA	62907	chr3	+	137907296	137907372	137906108	137906441	137928658	137928735	-27	-30.1	76	333	77	855	21286	atggtcagt	6.57	CTATGTTGCTCTTgaaccaggac	6.35	TCGGTGAGT	11.11	TTTTTCCCCCCACTTTCTAGGAA	11.23	downstream	ttcgagctgtccgactctgagaatggtcagtttac	8.83138473553904,6.61098936652611,6.72385481887907	6.8547708905626,4.56269112738394,4.64058721365607	7.80049774064911,4.84650051146021,4.92924190495336	6.2211017382404,3.86571078922535,3.93170774863672	NA	NA	-14.9	0.719405	NA	NA	-27	0.413843	NA	NA	-30.1	0.00651463	7.38874	5.35268	5.85875	4.67284
C8orf59	MATS_only	ENSG00000176731	NA	70509	chr8	-	86127149	86127266	86129614	86129731	86126790	86126860	-26.9	-15.7	117	117	70	2348	289	CTGGTAAGC	8.69	GCTTTTTTTCTTTTTAAAAGATA	7.28	AAGGTGAGT	10.47	ATAATACTTTCTCCTTTCAGATT	11.55	none	ACTTGAACCTCTGCAGAAAGAACTGGTAAGCAGAA	24.0224363900043,27.3792833964678,26.2062942436411,24.0916653133185	15.0266099345902,17.1263982223932,16.3926653831893,15.0699142859867	18.5115388763436,21.0983041341733,20.1944060469203,18.564886250627	14.3410019973708,16.3449848092305,15.6447294516773,14.3823305333863	NA	NA	3.9	0.560539	NA	NA	-26.9	1.83e-05	NA	NA	-15.7	0.00875324	25.4249	15.9039	19.5923	15.1783
JAKMIP1	MATS_only	ENSG00000152969	NA	22688	chr4	-	6107199	6107694	6114448	6114724	6087146	6087356	-26.9	-10.9	495	276	210	6754	19843	CTGGTACGT	9.57	TCTCGCCGCTCTGGCTGCAGGTG	10.11	AAGGTGGGG	5.87	TTATTCTTTCTCCTTTTCAGATG	13.18	none	GTGCGAGCGCGACATCCGCAGGCTGGTACGTGCCG	19.2927533631958,16.6390856947628	18.4961657943876,16.0218428309381	17.7368273389966,15.3336973647154	15.2060320743133,13.2730914505672	NA	NA	-13.8	0.444746	NA	NA	-26.9	0.0702655	NA	NA	-10.9	0.035985	17.9659	17.259	16.5353	14.2396
PRRC2C	MATS_only	ENSG00000117523	NA	71555	chr1	+	171560290	171560339	171557517	171557644	171560725	171561362	-26.6	2.5	49	127	637	2646	386	GGTGTTGGT	-12.05	CTGATGCTCTTCCCCTGCAGAAG	10.66	CAGGTGGGC	8.07	GTTCTTTCTCATTTTTTAAGGCA	8.13	none	AGCCACAAGACATTTGGTCCTAGGTGTTGGTAATG	20.9694	19.9533	25.9796	22.755	NA	NA	-6.2	0.605838	NA	NA	-26.6	0.0297016	NA	NA	2.5	0.469204	20.9694	19.9533	25.9796	22.755
WIPF1	MATS_only	ENSG00000115935	NA	52447	chr2	-	175439931	175440108	175446037	175446167	175436403	175437174	-26.2	-43.3	177	130	771	5929	2757	ATGGTAAGG	9.33	GGGTGTCTCTTCTTCTACAGAAC	9.48	ACAGTAAGT	9.49	TTTGTTTTCCTGTTCTTCAGATT	10.29	none	AGATCCACGGCCAACAGGGATAATGGTAAGGAGAG	6.36041521244513,5.70806685837452	8.078082495322,7.27389962371548	10.717140703866,10.2755207467513	13.041805192625,12.5108955378823	NA	NA	NA	NA	NA	NA	-26.2	0.706002	NA	NA	-43.3	0.0074389	6.03424	7.67599	10.4963	12.7764
GK	both	ENSG00000198814	3118	70349	chrX	+	30745582	30745669	30742217	30742298	30746848	30748725	-21.2	10.7	87	81	1877	3284	1179	CAGGTTAGT	8.02	TTCTGCTTGGATGACCACAGGTG	5.79	GTGGTAAAA	2.98	GTTTTTGTTCCCCATTTCAGGTA	12.06	none	TTAATCGGAGCAAGGTACATCTCAGGTTAGTTACT	3.2345832944411,3.22161614537653,3.16037939539887,3.17285731360838	2.4024147506725,2.39278368931123,2.34730145619564,2.35656915222799	1.47493781056025,1.46902491956023,1.44110157064134,1.44679137723743	1.08826472914748,1.08390197522217,1.06329907554021,1.0674972293809	-37.8667	1.76e-05	-37.3	0.0899089	-21.2	0.0196928	-26.2	0.0354664	10.7	0.128232	-29.4	0.0799222	3.19736	2.37477	1.45796	1.07574
ZNRD-AS1	MATS_only	ENSG00000204623	NA	54141	chr6	-	30024867	30025494	30025891	30025967	30003206	30003760	-26.2	62.7	627	76	554	397	21107	AAAGTGAGT	8.4	TTCTGACTTCACTTTGACAGAAT	5.62	TTGGTAAGT	10.47	ACTTATATTTCCTCATTCAGCAT	7.72	none	ACCATGCAGTAGAAGTCGGATTAAAGTGAGTATTC	5.96428	9.09459	5.69622	8.1288	NA	NA	-49.2	0.392031	NA	NA	-26.2	0.742183	NA	NA	62.7	0.00364139	5.96428	9.09459	5.69622	8.1288
SRRM1	MATS_only	ENSG00000133226	NA	5132	chr1	+	24989673	24989715	24989150	24989295	24993305	24993416	-25.9	-20.2	42	145	111	378	3590	AAGGTTGGT	8.46	TTTTTCTCCACTGCTCTCAGGAT	8.74	TCGGTAACA	5.35	TATAATTCTTCTTGGTTTAGTGG	6.1	none	GATGGCAATCGCCAGTGACTAAAAGGTTGGTTAGA	31.0321	28.8044	27.1076	24.0522	NA	NA	8.1	0.544217	NA	NA	-25.9	7.65e-05	NA	NA	-20.2	0.00552826	31.0321	28.8044	27.1076	24.0522
ZNF3	MATS_only	ENSG00000166526	NA	59902	chr7	-	99677158	99677195	99679257	99679332	99674925	99675056	-25.7	11.1	37	75	131	2062	2102	CAGGTAAAG	9.65	TTGCTCCTTTGGCCTTCTAGGGA	10.02	AGGGTGAGT	9.25	TTGAACTTTTGCTTCTGCAGTGC	8.26	none	AAGAAGGAAGGAAAGAATCAGGCAGGTAAAGCTTT	6.63466235975901,16.349718090455	5.88553654125928,14.7572003388303	7.61180602296489,18.4012600914917	6.84303117520498,17.1940163142648	NA	NA	-11.5	0.0603097	NA	NA	-25.7	0.00619495	NA	NA	11.1	0.227132	11.4922	10.3214	13.0065	12.0185
CTAGE5	MATS_only	ENSG00000150527	NA	22254	chr14	+	39790131	39790260	39788412	39788495	39796067	39796226	-25.6	-37	129	83	159	1636	5807	GAGGTATAT	7.3	TGCTGTTTTAATTATTCCAGAGC	7.18	GAGGTAGTC	4.52	GTTTTTTTTTCTTTAATTAGGCT	8.79	none	TTGCTTCCAGGGGGAGGAGGAAGAGGTATATTGTT	4.4992401408504,4.36529794450573,4.81431420726948,4.38309127851866,4.63742826801065,4.54231931989543,4.7821470137583	3.6643254724425,3.55523865188265,3.93539556173125,3.56973011377891,3.79080256046001,3.69941053751236,3.91510888299096	4.05128236161759,3.93067585017566,4.32081811250264,3.94669762673888,4.16206404343034,4.09007244900002,4.29637066858407	3.49821208243711,3.39407045075428,3.77798646509564,3.40790497704811,3.6391769367569,3.53170665039061,3.75522099333839	NA	NA	3.6	0.578699	NA	NA	-25.6	0.608517	NA	NA	-37	0.0206935	4.57483	3.73286	4.114	3.57204
IP6K2	MATS_only	ENSG00000068745	NA	25807	chr3	-	48732126	48732257	48732522	48732851	48730920	48731673	-25.5	-53.3	131	329	753	265	453	TAGGTAGGC	7.72	TAGTTGTGTTTTATGTTCAGGTG	6.73	AAGGTAAGT	11	TCTCTGTTGTTTTTTTCCAGGAC	12.3	none	GGAAACCAGAAGCCCGGGTAATTAGGTAGGCCGGG	53.0389472726685,50.3221204628299,47.9747329193743,55.7792626381614	60.7099735600749,57.6002119174717,54.9133215656362,58.0004329325787	42.4909247997703,40.3144018933601,38.4338467029993,54.6172120387253	42.9044830925955,40.7067763898402,38.8079180159701,56.2491585421874	NA	NA	27.5	0.189266	NA	NA	-25.5	0.000475426	NA	NA	-53.3	0.00326122	51.7788	57.806	43.9641	44.6671
ORAOV1	MATS_only	ENSG00000149716	NA	50278	chr11	-	69489318	69489534	69489957	69490073	69487983	69488089	-25.4	-12.4	216	116	106	423	1229	ttagtaagt	7.79	CACACCCCTTTTCCCTCCAGAGC	10.32	GAGGTGGGT	7.07	AGCATGCTTCTTCTTCACAGGTT	7.89	none	tggttatctacttcagccctacttagtaagtggat	4.80327	5.21788	5.92753	5.71341	NA	NA	-13.5	0.664754	NA	NA	-25.4	0.224739	NA	NA	-12.4	0.0466048	4.80327	5.21788	5.92753	5.71341
ADAL	MATS_only	ENSG00000168803	NA	47128	chr15	+	43639213	43639294	43638051	43638178	43641104	43641243	-25.4	7.4	81	127	139	1035	1810	GAGGTAAAT	8.39	TTTTAACTTTTATCTTTAAGGTA	9.95	ACTGTAAGT	8.59	CTTTCCTCCCCTTTCTTTAGATT	11.9	none	GAAGTTAGCATTGCATCTTTCAGAGGTAAATAATA	3.11560557118938,5.02329309449667	2.87371693210299,4.23050229170604	2.37069489346968,3.69650955885678	2.74016830712201,4.37120275828876	NA	NA	-32.1	0.00939555	NA	NA	-25.4	0.0300929	NA	NA	7.4	0.958374	4.06945	3.55211	3.0336	3.55569
C1orf50	MATS_only	ENSG00000164008	NA	27196	chr1	+	43233179	43233295	43232939	43233061	43239233	43239320	-25.2	4.5	116	122	87	118	5938	AAGGTGAGG	9.16	TTCCTGGGTGTGTGTCGCAGGAG	7.61	GAGGTATGC	9.12	TAGTTTTTTCTCACCTGTAGGCT	9.01	none	GGCGCTCGCAGAGCAGGTGCAGAAGGTGAGGAGGC	8.25085859767962,9.31548551350924	6.18756879746923,6.98596477133623	10.5706896298242,11.9346495820596	9.12340904683139,10.3006231173903	NA	NA	13.4	0.432336	NA	NA	-25.2	0.00827806	NA	NA	4.5	0.413816	8.78317	6.58677	11.2527	9.71202
ZNF33B	MATS_only	ENSG00000196693	NA	996	chr10	-	43132367	43132420	43133921	43134001	43127742	43127887	-25.1	-10.1	53	80	145	1501	4480	AAGGTAAGT	11	TTCCTCTTTTTCCAACTCAGCTG	7.17	GAGGTAAGC	9.85	CCTAATTCTGAACATTTCAGGTA	6.48	none	CCAAGAACAGAACAAAATGAACAAGGTAAGTTGTT	2.63083	1.80986	2.06171	1.67933	NA	NA	2.4	0.624712	NA	NA	-25.1	0.043035	NA	NA	-10.1	1	2.63083	1.80986	2.06171	1.67933
WDR67	MATS_only	ENSG00000156787	NA	35944	chr8	+	124146353	124146446	124142437	124142573	124153000	124153141	-25.1	5.1	93	136	141	3780	6554	AAGGTATAA	7.08	AGTTTGTTGTTTGGCCATAGGTA	7.94	AAGGTTTAT	4.64	TTTACAAATGATTTTAACAGAAT	5.16	none	ATCACAAAAGAGACTTTATGAGAAGGTATAATTCA	10.4743047971206,11.4123022416389	8.27470384194002,9.01572209644211	26.9278181788039,29.3392645828758	13.0783668034762,14.2495638306532	NA	NA	-4.6	0.477248	NA	NA	-25.1	0.0465314	NA	NA	5.1	0.791279	10.9433	8.64521	28.1335	13.664
GEMIN2	MATS_only	ENSG00000092208	NA	8300	chr14	+	39602864	39602923	39601161	39601272	39605643	39605745	-25	0	59	111	102	1592	2720	CAGGTATAG	8.73	ttttctttttttttttttaGGAT	13.77	GTGGTAAGT	10.36	ttttgtTTTTTTTTTACTAGGTA	10.66	none	ATTTATTAATCTGCTTGGTTAGCAGGTATAGTTAA	6.76475289142652,6.4710660477222,6.69267789867159	6.39681434975259,6.11910129115406,6.32865955454974	5.57785157803634,5.33569319458958,5.51842241358238	4.55568566926987,4.35790387788876,4.5071471613781	NA	NA	0.7	0.511731	NA	NA	-25	0.0336916	NA	NA	0	0.769584	6.64283	6.28153	5.47732	4.47358
RELL2	MATS_only	ENSG00000164620	NA	66610	chr5	+	141018521	141018588	141018361	141018427	141019030	141019196	-24.9	-11.9	67	66	166	94	442	CAGGTGAGC	9.6	TCTTTTCCTTCTTCCCTCAGCCA	9.61	AAGGTGGGT	8.23	CCCTCCTCCCTGCTGTCCAGTGT	6.3	downstream	GAGAAGGGACAGTGCAGCTGTCCAGGTGAGCTGGA	8.6919880217732,10.4182854107843	10.3937284202259,12.4580048767719	9.29845261797978,11.145198659973	12.0539097087405,14.4479112657432	NA	NA	-13.9	0.410319	NA	NA	-24.9	0.0226198	NA	NA	-11.9	0.156523	9.55514	11.4259	10.2218	13.2509
NASP	both	ENSG00000132780	1606	56451	chr1	+	46072992	46074009	46072153	46072263	46078840	46078920	-4.1	-7	1017	110	80	729	4831	AAGGTAACC	9.24	CATGTTCTTTAACCATGTAGAGG	5.09	ATGGTATGT	8.35	TGAGGAATTTTTACTTGTAGAAA	4.91	none	GAAGAACAGATGAAAGAGGGTGAAGGTAACCGGGA	45.5496293419212,48.3716780136376,65.9207696412765	35.6878060033294,37.8988607799152,51.6484474744754	30.8990359952077,32.8134002775827,44.7179980036186	28.460886210841,30.2241937785988,41.1894355848186	-0.84	0.68397	6.2	0.645364	-4.1	0.139357	-24.6	0.00135404	-7	0.536164	-23.6	0.00287166	53.2807	41.745	36.1435	33.2915
PRR3	MATS_only	ENSG00000204576	NA	756	chr6	+	30529104	30529285	30525090	30525227	30529610	30529901	-24.6	26.5	181	137	291	3877	325	actgtatga	1.14	agtggcatttctcgttatagccc	6.65	TCGGTGAGG	8.99	ctctctctctctctctcCAGCTC	13.33	none	agccagacataaaagaatgcagactgtatgattcc	7.71129094041707,7.85669989858716	10.7928248878144,10.9963411906974	6.47647200175055,6.59859643638397	8.94913865662018,9.11788925086354	NA	NA	-23.1	0.28435	NA	NA	-24.6	0.0324157	NA	NA	26.5	0.612543	7.784	10.8946	6.53753	9.03351
LUC7L	MATS_only	ENSG00000007392	NA	17587	chr16	-	258599	258663	270647	270746	258076	258187	-24.5	-11	64	99	111	11984	412	CCAGTGAGT	8.28	TCTATTGTTTTGTTTTTGAGGTG	4.63	GATGTAAGT	9.11	CTGTGCTTTTCCCGTGCTAGGCA	9.4	none	ATATTTACGTGGCTCACAAAGACCAGTGAGTACAT	41.1064120336794,59.018410641424	27.3341008543517,39.2320996661732	53.9654896664838,77.483925176631	34.7374092377014,49.8781282985478	NA	NA	16.8	0.0665176	NA	NA	-24.5	0.0410669	NA	NA	-11	0.116595	50.0624	33.2831	65.7247	42.3078
TCEB3	MATS_only	ENSG00000236810	NA	55271	chr1	-	24098757	24098916	24104688	24104777	24098600	24098656	-24.1	-15.5	159	89	56	5772	101	TTTGTAAGG	3.89	atgactttgtgactttacagtgg	6.83	CAGGTGTGC	6.46	CTTGCACTCCTATGTTGCAGGAA	8.91	none	TGCAGTTGCTAAGGGAGCTGGGTTTGTAAGGAGCC	10.1268	14.2085	10.9111	13.1474	NA	NA	3	1	NA	NA	-24.1	1	NA	NA	-15.5	0.0405027	10.1268	14.2085	10.9111	13.1474
FRYL	MATS_only	ENSG00000075539	NA	47991	chr4	-	48504844	48504862	48507563	48507632	48503639	48503750	-23.6	-0.9	18	69	111	2701	1094	GCAGTAAGT	9.07	CTGATCACCTTCTTGCTTAGCAA	4.64	CAAGTAAGT	10.08	GTAATGTTATTTATTTCTAGGAA	8.31	none	TGCTTAGCAAATGGAAATACTAGCAGTAAGTGACC	8.67745	6.29688	8.94284	5.93115	NA	NA	-18.3	0.0514883	NA	NA	-23.6	0.0402755	NA	NA	-0.9	0.902763	8.67745	6.29688	8.94284	5.93115
MATR3	MATS_only	ENSG00000015479	NA	72831	chr5	+	138615623	138615747	138614739	138614818	138618427	138618678	-23.6	24.6	124	79	251	805	2680	caggtaata	8.55	AATCAATTTCTTAATCTCAGAat	5.19	AACGTATGT	7.69	atgtcttttgtctgttctaggat	13.96	none	cagcaaacttgctgtaaagagccaggtaatataat	42.7292374851623,17.8329157380821,52.2593243395496,42.1040059587913	36.5599262567557,19.1110281577175,44.7140449146855,36.0249665934699	37.4822449751558,19.4006575182545,45.8420723705006,36.9337895704515	28.0230313405655,9.35382277907811,34.2731293604879,27.6129869847614	NA	NA	-10.3	1	NA	NA	-23.6	0.0091544	NA	NA	24.6	1	38.7314	34.1025	34.9147	24.8157
ZNF763	MATS_only	ENSG00000197054	NA	12818	chr19	+	12088185	12088246	12087843	12087979	12088930	12090390	-23.4	-5.2	61	136	1460	206	684	CAGGTAATT	8.55	TTTCTGTGTCTGTATTTTAGGGA	12.24	TAGGTAAGG	9.31	GTGCTTCTCACTTTTGACAGGAG	7.62	none	ACCAAAACCCCAGGAGAAACTTCAGGTAATTGGCA	0.890533	1.04083	1.59276	1.51985	NA	NA	6.9	0.50507	NA	NA	-23.4	0.0179131	NA	NA	-5.2	0.304668	0.890533	1.04083	1.59276	1.51985
C8orf59	MATS_only	ENSG00000176731	NA	70511	chr8	-	86131464	86131589	86132534	86132582	86129614	86129731	-23.3	-16.1	125	48	117	945	1733	AAGGTAAAA	8.38	CTGCATTCTTTTTTAAGTAGGAG	3.96	CTGGTGAGA	7.54	GAATTTATTTTCTTTTCTAGACA	8.98	none	CAGTCAAGACTACGACTGAGCAAAGGTAAAAAAGG	24.0224363900043,27.3792833964678,26.2062942436411,24.0916653133185	15.0266099345902,17.1263982223932,16.3926653831893,15.0699142859867	18.5115388763436,21.0983041341733,20.1944060469203,18.564886250627	14.3410019973708,16.3449848092305,15.6447294516773,14.3823305333863	NA	NA	-9.5	0.18053	NA	NA	-23.3	9.77e-07	NA	NA	-16.1	0.0010692	25.4249	15.9039	19.5923	15.1783
HERC5	MATS_only	ENSG00000138646	NA	27654	chr4	+	89391764	89391824	89390307	89390411	89393559	89393653	-23.3	-2.8	60	104	94	1353	1735	AAGGTAATA	8.49	GTGTCTTATTACTAATATAGGGA	6.04	AAGGTACAC	7.56	AATTTATCTTTCTTCTACAGAAG	8.97	downstream	TAACTGGAAGTTTTTTAAGGAAAAGGTAATATATG	9.82632	6.89819	5.85028	4.75248	NA	NA	-2.6	0.278104	NA	NA	-23.3	0.00674429	NA	NA	-2.8	0.840067	9.82632	6.89819	5.85028	4.75248
TUSC3	MATS_only	ENSG00000104723	NA	12738	chr8	+	15615299	15615364	15605883	15605974	15621711	15621968	-23.2	-48.8	65	91	257	9325	6347	caggcaagt	3.1	cattgtggtgtattggaaagtga	-0.11	TAGGTAATA	6.84	TAATTTTCTTTCTTTTTCAGCTT	10.84	none	gcacttaaaaactctataacctcaggcaagtcttt	5.61187806980049,5.70739314561537	3.35533089827993,3.41243917489376	4.96986039646415,5.05444822724974	2.90201157078251,2.95140427884768	NA	NA	36.5	0.634548	NA	NA	-23.2	0.163307	NA	NA	-48.8	0.0254712	5.65964	3.38389	5.01215	2.92671
ZBTB8OS	MATS_only	ENSG00000176261	NA	40051	chr1	-	33100302	33100393	33116033	33116126	33099551	33099673	-23.1	-5.7	91	93	122	15640	629	TTGGTATCC	0.48	TTTTTCCCTCTGTCCCTCAGATT	11.35	AGTGTGAGT	6.96	GCATGAATATACTTCTTTAGGTT	6.74	none	AGGAAGACTGAATGTTTCAATCTTGGTATCCCTAT	31.9802	25.8986	15.8472	19.2793	NA	NA	-13.2	1	NA	NA	-23.1	0.00566438	NA	NA	-5.7	1	31.9802	25.8986	15.8472	19.2793
MRRF	MATS_only	ENSG00000148187	NA	19189	chr9	+	125048317	125048445	125047447	125047566	125054027	125054119	-23	-1.7	128	119	92	751	5582	aaggTGAAG	5.73	TTTTGTTATtggtccactaggaa	7.55	GAGGTAAGA	10.06	CCTTTTGATCTGGTTTTCAGTGT	8.12	downstream	ccatttcctcatctgctaatataaggTGAAGGAAT	7.36120557382244,7.98429188392353,8.7221188610934	8.40668994384775,9.11827086150388,9.01690771277715	6.48726875633825,7.03638103305489,6.88829278269048	7.10515419933739,7.70656714296009,7.0635705440005	NA	NA	-7.8	0.965718	NA	NA	-23	0.00641487	NA	NA	-1.7	0.164412	8.02254	8.84729	6.80398	7.29176
ELP2	MATS_only	ENSG00000134759	NA	6637	chr18	+	33718757	33718835	33718232	33718389	33721099	33721164	-22.9	-16.1	78	157	65	368	2264	ATGGTGAGT	10.13	TGTTTTTTATTATTTCTTAGTAA	6.98	AAGGTAGGT	10.29	CCTGTTTTTTCTTCCCCCAGTAC	9.94	none	TTATCTTTTTTGCCAAATACTGATGGTGAGTATCC	22.7129593152055,22.3561657014418,22.2284161831478,20.6913448513344,24.1613219382041,22.9091450650817,24.2014070845139	15.1476882711966,14.9097360799632,14.8245375880777,13.7994365846468,16.113627813128,15.2785281384782,16.1403613308602	26.3535900045707,25.9396064067977,25.7913800844732,24.0079335892702,28.0341087874708,26.5812221129729,28.0806191297146	17.2400163480545,16.9691961678743,16.8722293326293,15.7055326234581,18.3393797093797,17.3889289352776,18.3698058889058	NA	NA	0.5	0.759817	NA	NA	-22.9	0.00350649	NA	NA	-16.1	0.00703254	22.7515	15.1734	26.3984	17.2693
C9orf142	MATS_only	ENSG00000148362	NA	5708	chr9	+	139887091	139887426	139886942	139887014	139887504	139887695	-22.6	2.1	335	72	191	77	78	CAGGTGAGA	9.22	TGACAGGCCTTCTCCCCCAGCGT	5.49	CTAGTGAGT	7.43	CCGCACCTCTCCTCTCCCAGGGC	9.08	none	CTGAGGACATCACCCCCCGGTTCAGGTGAGACCCA	37.6928	28.0129	27.1801	35.6175	NA	NA	-0.1	0.704767	NA	NA	-22.6	0.0343161	NA	NA	2.1	0.771822	37.6928	28.0129	27.1801	35.6175
DROSHA	MATS_only	ENSG00000113360	NA	27379	chr5	-	31531556	31531632	31532096	31532181	31530904	31531031	-22.5	-5	76	85	127	464	525	CAGGTGCAG	4.95	GGCCGTGTTAACTATTCAAGACA	1.58	TAGGTAAAA	6.02	tgaccacctactgtgtgtaggtt	6.53	none	GGAGAAAAGAGAGTTACTTTTCCAGGTGCAGTGAA	18.0744862510996,18.1919402092854	19.2566252419847,19.3817611282583	21.9764733611464,22.1192837153313	17.7149542935883,17.8300718948278	NA	NA	4.1	0.329287	NA	NA	-22.5	0.0425015	NA	NA	-5	0.515396	18.1332	19.3192	22.0479	17.7725
PARPBP	MATS_only	ENSG00000185480	NA	37261	chr12	+	102545347	102545578	102542007	102542241	102547646	102547754	-22.4	-27.8	231	234	108	3106	2068	CAAGTGAGA	5.26	CCTTCTGATCTACCTGGCAGGGG	7.14	CCTGTAAGT	7.52	ATACTCTATGTTTTCTACAGAGT	8.11	none	GAAGCTGGCAGCTGTCATGCGGCAAGTGAGACAAT	12.6313	8.93658	6.00896	3.86712	NA	NA	-11	0.440723	NA	NA	-22.4	0.0473188	NA	NA	-27.8	0.107075	12.6313	8.93658	6.00896	3.86712
C22orf25	MATS_only	ENSG00000183597	NA	44557	chr22	+	20043465	20043536	20039987	20040107	20049052	20049206	-22.4	41.8	71	120	154	3358	5516	CAGGTGAGC	9.6	TCTCTCCCCTTGGCCTGCAGCAC	8.81	gaggtaagg	10.28	CCGCTGATTGCTCCTCACAGGCA	6.92	none	CCTGATCCTATCGTTTTGACGCCAGGTGAGCCTGC	11.4071	10.027	13.7595	12.9637	NA	NA	-36.2	0.208909	NA	NA	-22.4	0.190014	NA	NA	41.8	0.015333	11.4071	10.027	13.7595	12.9637
SLC4A7	MATS_only	ENSG00000033867	NA	60616	chr3	-	27477878	27478039	27478878	27479017	27475406	27475595	-22.3	-39.3	161	139	189	839	2283	CAGGTTATA	1.5	TTTATACATTATGCATTCAGATG	5.24	TAGGTAATA	6.84	TTTTTTTTTTCATTGAATAGATA	7.49	none	GCAAGCACTCTAGATGAAATAGCAGGTTATAGTAA	9.5028	6.15127	13.6036	5.2931	NA	NA	-1.3	0.93711	NA	NA	-22.3	0.00274673	NA	NA	-39.3	1.93e-07	9.5028	6.15127	13.6036	5.2931
RASSF8	both	ENSG00000123094	5594	42432	chr12	+	26147969	26148063	26111961	26112081	26208168	26208379	0.4	-11.1	94	120	211	35888	60105	GAGGTGAGT	10.03	AACCCTATGTACCTTTGCAGGTG	9.3	TGAGTAAGT	8.82	GATTTTTTGCCCTTTTTTAGCTG	9.16	none	GGCTCGGAGACTCCTGCCTGCTGAGGTGAGTGGTG	2.57169897462725,2.10352675430458,6.15447133973065	1.92589499508309,1.64200985916135,4.60784924519134	1.63706836723716,1.35011409984951,3.9139917563539	1.27058066936213,1.06249699866135,3.03777311026959	NA	NA	11.8	1	0.4	0.896571	-22.3	1	-11.1	0.0135395	-35.3	1	3.6099	2.72525	2.30039	1.79028
WDR20	MATS_only	ENSG00000140153	NA	54260	chr14	+	102661274	102661457	102606229	102606509	102689166	102689695	-22.1	14.8	183	280	529	54765	27709	GAAGTAAGT	9.82	TTTTTCTCTTTCTCCTCCAGGCT	12.92	AAGGTACCG	9.67	GTAGACTGCTTTGTTTGCAGGGC	5.8	none	AACTAGCAAACTTTTTAATGAGGAAGTAAGTAGCA	8.19636611512482,12.3245213766904,7.60553718250509,8.95890444583531,8.863300307685,11.4597255899057,8.81236180016957,8.07680810047956,7.89448015524102	6.22838474327481,8.34354293899707,5.72813402916585,6.80783446995251,6.735185280411,7.75808728031744,6.69647731902933,6.13753310196286,5.99898284976014	7.54565854565901,12.1908748626477,7.13696987819857,8.24765913844616,8.15964499023686,11.3354568795708,8.11275047879872,7.43559221355053,7.26773924080899	5.96191521919863,8.0499501708655,5.53488191487301,6.51657429801846,6.44703326504716,7.48509553847732,6.4099813497308,5.87495049152798,5.74232784676874	NA	NA	-5.1	0.373084	NA	NA	-22.1	0.807208	NA	NA	14.8	0.0132079	9.13245	6.71491	8.60359	6.44697
SDR39U1	MATS_only	ENSG00000100445	NA	35452	chr14	-	24911314	24911466	24911551	24911581	24910883	24911001	-21.9	-11.4	152	30	118	85	313	CCTGTGAGC	3.28	CTGTGTGCTTTCTCCGACAGGAT	11.42	TGGGTAAGT	10.24	TTCCCATGTTTCTCCTGCAGATG	13.18	none	GACAGTGCCCCACTGATGAGAACCTGTGAGCTATG	44.3462	40.6389	45.8531	44.1046	NA	NA	32.8	0.112265	NA	NA	-21.9	0.298108	NA	NA	-11.4	0.01989	44.3462	40.6389	45.8531	44.1046
2015-09-06	MATS_only	ENSG00000125354	NA	23518	chrX	-	118759297	118759342	118763280	118763471	118750678	118750705	-21.8	-36.4	45	191	27	3938	8592	CTGGTAAGC	8.69	CAGCTCTTACTGTTTTACAGTTA	6.36	AAAGTAAGT	9.72	TCTTTCTCTCTCCTTTCCAGCTT	11.56	downstream	ATGCTGCATGAGACCCAGGGTCCTGGTAAGCTTGA	67.079521655319,93.0317287930826,131.978227264268,129.700995582177	56.1365424639567,77.8550512140404,115.873268332585,113.873921294638	68.4690821111743,94.9588923786399,132.093215935804,129.81400017004	62.3929681139618,86.5320077563983,128.882400895366,126.658586462739	NA	NA	12.5	0.234917	NA	NA	-21.8	0.00080027	NA	NA	-36.4	2.25e-06	105.448	90.9347	106.334	101.116
GINS3	MATS_only	ENSG00000181938	NA	4378	chr16	+	58437001	58437235	58426324	58426691	58438402	58440047	-21.8	-26.3	234	367	1645	10310	1167	CAGGCAAGT	3.1	TACATTCATGCATGCTGCAGGGT	4.71	CAGGTGAGC	9.6	CTTACTCCCTTGTTTCCCAGACT	8.57	none	AGACATTTCCCAGTCTCTGCTGCAGGCAAGTAATG	8.02035413066191,6.84296211900891,7.19504064492098	9.54491358058421,8.14371547653358,8.5627193071204	4.7023597154567,4.01205094919768,4.21847573418279	5.79767132914033,4.94657026827531,5.20107718181454	NA	NA	-21.5	1	NA	NA	-21.8	0.0169054	NA	NA	-26.3	1	7.35279	8.75045	4.31096	5.31511
POMT1	both	ENSG00000130714	2265	71173	chr9	+	134379575	134379727	134378330	134378460	134381500	134381607	-15.4	-6.2	152	130	107	1115	1773	GGTGTAAGC	4.48	GCTCCTCCCTTCTTTTCTAGGGC	12.3	CGGGTACAT	4.13	GTTGTTGTTTTTTTTTCTAGTTT	8.36	none	GACTCACCTACCCGCGGGCTGTGGTGTAAGCTAAA	19.7607341000816,18.7855290405971,17.4275389894696,18.3914270327524	17.3556531035599,16.4991403529946,15.3064314118143,16.1530045413933	17.1984455932387,16.3496911353906,15.1677857521093,16.0066906220607	16.3756280808319,15.5674802015182,14.4421201869506,15.24088970778	7.32	0.382929	30	0.645959	-15.4	0.0412299	-21.8	0.430455	-6.2	0.588847	-21.6	0.68791	18.5913	16.3286	16.1807	15.4065
IP6K2	MATS_only	ENSG00000068745	NA	25791	chr3	-	48732134	48732257	48732522	48732851	48731607	48731673	-21.7	-54.4	123	329	66	265	461	CGGGTAATT	6.79	TAGTTGTGTTTTATGTTCAGGTG	6.73	AAGGTAAGT	11	TCTCTGTTGTTTTTTTCCAGGAC	12.3	none	GTCCTCCAGGAAACCAGAAGCCCGGGTAATTAGGT	53.0389472726685,50.3221204628299,47.9747329193743,55.7792626381614	60.7099735600749,57.6002119174717,54.9133215656362,58.0004329325787	42.4909247997703,40.3144018933601,38.4338467029993,54.6172120387253	42.9044830925955,40.7067763898402,38.8079180159701,56.2491585421874	NA	NA	32.5	0.279561	NA	NA	-21.7	0.000952606	NA	NA	-54.4	0.0211262	51.7788	57.806	43.9641	44.6671
TBC1D5	MATS_only	ENSG00000131374	NA	26948	chr3	-	17665340	17665405	17783972	17784056	17549965	17550097	-21.4	-55.2	65	84	132	118567	115243	TCTGTAAGA	4.08	TTTTTTTTTCTTTATTTCAGTGA	10.68	CAGGTAAAA	8.59	TGTATTTTTTCACCTCCCAGGTA	9.13	none	ATTCTCAAAGCCTGAAAGAAAATCTGTAAGAATAA	8.58311060382199,10.3651307403831,9.43199463791712	7.79645226831202,9.39198599654679,8.62897163587233	5.59934501637194,6.76863196077134,6.2975899267002	4.91225477203346,5.92788002499682,5.63261949605269	NA	NA	9.1	0.359922	NA	NA	-21.4	0.0312319	NA	NA	-55.2	0.271928	9.46008	8.6058	6.22186	5.49092
RPS9	MATS_only	ENSG00000170889	NA	17288	chr19	+	54710420	54710592	54705354	54705477	54711265	54711390	-21.3	NA	172	123	125	4943	673	CAGGTAACA	8.88	TGTCCCTATCTCCTATGCAGCCC	9.26	AAGGTGCGT	9.49	CACCTTGTCGCTTCTTCCAGGGT	9.14	downstream	GCCAGGCATGTGGGCAGCTGGACAGGTAACAGCTC	789.467	522.042	761.803	714.269	NA	NA	-5.5	0.972076	NA	NA	-21.3	0.0047335	NA	NA	NA	NA	789.467	522.042	761.803	714.269
RHOC	both	ENSG00000155366	1745	58195	chr1	-	113247721	113247790	113249699	113249736	113246265	113246428	-8	-23.6	69	37	163	1909	1293	GAGGTCAGT	7.7	CCCCTCCCCCTTCCCAACAGCCT	10	AAGGTACCC	9.16	CAATACGTCTTTCCTGGCAGCCC	7.44	none	GCCTGGGAACTTCAGCCGGCTGGAGGTCAGTTCCC	43.6571255070994,44.5964914878813,41.5008322644438	32.6173693770023,33.2049297774184,31.0063468379807	52.0629988319906,53.1733822310531,49.4915264487356	83.9419963426515,85.7927543426787,79.7959707537875	8.57333	0.00767784	11.6	0.421526	-8	0.223175	-21.2	0.0837249	-23.6	0.0168156	-24.4	0.00130376	43.2515	32.2762	51.576	83.1769
RCSD1	MATS_only	ENSG00000198771	NA	2112	chr1	+	167602885	167603043	167599502	167599666	167610627	167610978	-21.1	-13.9	158	164	351	3219	7584	CAGGTGAGA	9.22	GCTTTTTCTAATTCATGCAGAGG	6.09	GAGGTAAAG	8.27	CCCTTCATTCATTTATTTAGAGA	6.68	none	TTCATGGAGTGAGCAAGGGAACCAGGTGAGAAAGC	39.2631	48.2951	75.3543	79.4096	NA	NA	NA	NA	NA	NA	-21.1	0.00791371	NA	NA	-13.9	0.166699	39.2631	48.2951	75.3543	79.4096
C14orf135	both	ENSG00000126773	5325	16912	chr14	+	60574303	60575045	60558636	60559137	60581417	60581597	8.7	-16	742	501	180	15166	6372	CAGGTAAAA	8.59	ttttaatttttattttttaGAAA	9.92	GAGGTACGT	10.2	TGTTCTTTTTTTTTATATAGGTT	10.82	none	TTGTTTCTGTGGATCTGGCACACAGGTAAAAACCT	14.7659	12.1521	19.2157	14.2848	1.82667	0.553766	-3.6	0.725932	8.7	0.152959	-20.9	0.179587	-16	0.058005	-31.7	0.00162157	14.7659	12.1521	19.2157	14.2848
DNM1	MATS_only	ENSG00000106976	NA	31876	chr9	+	131010202	131010214	131009653	131009765	131010861	131011032	-20.9	-29.5	12	112	171	437	647	AAAGTGAGT	8.4	TTGGTGTGTGGGCCTCCCAGGAC	5.8	GGGGTGAGT	7.93	CCTTGTGTTCTCCATGGCAGGCC	9.81	none	GTGGGCCTCCCAGGACAAAGAGAAAGTGAGTGTGC	20.5684379801644,20.3344182368476	21.6162044764997,21.3702636506601	16.9720281663043,16.7789269848304	17.0244115549878,16.8307143755491	NA	NA	0.2	1	NA	NA	-20.9	0.00132483	NA	NA	-29.5	1	20.4514	21.4932	16.8755	16.9276
RPA2	MATS_only	ENSG00000117748	NA	13561	chr1	-	28224143	28224218	28233438	28233552	28223515	28223632	-20.8	-9.5	75	114	117	9220	511	CAGGTAAAG	9.65	ATGTTTGTATTTTATGTTAGGAC	7.66	GATGTAAGT	9.11	TTTTTCCTTCATTTTAATAGAAC	7.9	downstream	GGCAGGCCACCTGAGATCTTTTCAGGTAAAGTCAG	23.5107	25.4827	15.2933	20.8584	NA	NA	0.6	0.550995	NA	NA	-20.8	0.00329598	NA	NA	-9.5	0.339667	23.5107	25.4827	15.2933	20.8584
FES	MATS_only	ENSG00000182511	NA	69409	chr15	+	91436883	91437041	91436520	91436644	91437165	91437288	-20.7	0.8	158	124	123	239	124	ACGGTACCT	6.79	CCCTGCCCTGTCTCACCCAGGGA	9.15	CCGGTGAGT	10.9	CCTCCTCGCCTCCTCTGCAGGCC	10.42	none	ACCGCACCTGAGGCCCTTAACTACGGTACCTAGTC	3.77920787296038,3.92261626621689,3.83413378471919,3.41378965029727	4.25238523442202,4.41532971994451,4.31418816879392,3.84259021980079	4.2550941919092,4.4149676731081,4.31693649748398,3.84227513628021	6.88740362029269,7.14617890082392,6.98750314808056,6.21920420330418	NA	NA	-2.4	0.859862	NA	NA	-20.7	0.0297357	NA	NA	0.8	0.887913	3.73744	4.20612	4.20732	6.81007
STRADA	MATS_only	ENSG00000125695	NA	67441	chr17	-	61803997	61804055	61805693	61805773	61791365	61791468	-20.3	-62.5	58	80	103	1638	12529	GAGGTAAGT	11.08	TTTGGGGTTTTCCTCTTTAGCGG	7.85	AGGGTGAGT	9.25	TTTTTCTTTTTCTTTTTTAGACC	13.23	none	TTAAGAGATTTGGAACTATTTGGAGGTAAGTACAG	14.9983501826276,19.2567979185937,19.6667108354984,18.6771907934608,17.7900841704081,18.0136164238491	13.7733973689303,17.6840470155974,18.0604813181999,17.151777855649,16.3371234517222,16.5423992663235	17.3200687591837,22.2377168135513,22.7110835385323,21.5683875114364,20.5439583228316,20.802092981134	15.6341958448962,20.0731778054897,20.5004687237712,19.4689985993047,18.5442836465778,18.7772924099013	NA	NA	16.3	0.750409	NA	NA	-20.3	0.0487741	NA	NA	-62.5	0.00175624	18.0671	16.5915	20.8639	18.8331
UBE2V1,TMEM189-UBE2V1	MATS_only	ENSG00000244687	NA	4197	chr20	-	48732021	48732158	48732235	48732491	48713208	48713357	-20.3	28.5	137	256	149	77	18664	aagGTGAGT	10.47	AAAGcattttatctccacagcaa	6.68	ttggTAATT	5.73	TTTCTTTCCATTTATTTTAGGAG	10.71	none	gaacctagaaaatttcactgcaaagGTGAGTCCAC	45.1023683583764,35.7653462136366,42.1930559109415,36.8839212170687	42.9078039810181,32.5575309176175,38.2819683294473,33.5757802598826	54.4864449257445,44.5050131565126,52.7860066898732,45.8969246159162	56.2107840877255,41.6671122861968,49.2261674820364,42.9702673008342	NA	NA	-59.1	0.0800035	NA	NA	-20.3	0.0169477	NA	NA	28.5	0.366754	39.9862	36.8308	49.4186	47.5186
NRIP1	MATS_only	ENSG00000180530	NA	53658	chr21	-	16386664	16386787	16437065	16437321	16333555	16340847	-20.3	60.3	123	256	7292	50278	45817	ACGGTGAGA	8.94	ATCTTTTCCCTCTTGTTAAGATG	6.69	GGGGTGAGT	7.93	CTTATTTTTATTTTTTTTAGAAC	9.14	none	GAGGCTCAGAGCTTGGAGACAGACGGTGAGAATAT	1.2477	1.0908	1.33864	1.041	NA	NA	-40	0.369142	NA	NA	-20.3	1	NA	NA	60.3	0.0254407	1.2477	1.0908	1.33864	1.041
C6orf1	MATS_only	ENSG00000186577	NA	50670	chr6	-	34215243	34215269	34215457	34215641	34214820	34214926	-20.1	0	26	184	106	188	317	GCGGTGAGT	10.49	GTGCTGTGTCTCTGTTGCAGGTA	12.47	GTGGTAAGG	8.37	TCCCCTCCCCTGCTCCCCAGGGT	10.34	none	TAATGTATGTACAGAAGAAAAAGCGGTGAGTGTCC	7.12522770034445,9.61188434744453,9.00736331930337	5.73271566450097,7.73339495681004,7.24701791550123	10.7396604099118,14.4877298147133,13.5765518389451	14.3298310905851,19.3308459678362,18.1150694918717	NA	NA	-2	0.705757	NA	NA	-20.1	0.0428499	NA	NA	0	0.741942	8.58149	6.90438	12.9346	17.2586
ALS2CR8	MATS_only	ENSG00000138380	NA	55150	chr2	+	203839056	203839219	203836227	203836461	203841991	203842055	-20.1	39.4	163	234	64	2595	2772	ACGGTATGA	8.54	CCATTTTGTATTCTTTACAGAAA	9.09	AAGGTACAA	6.82	AATAAATGTTCCCATTTCAGCTT	8.2	none	TAACTCAGAGATTATTCCAGCAACGGTATGATTAC	2.64039822971186,2.29994319205612	3.25584682838972,2.83700707950702	3.00819067876861,2.59533671807979	2.92142212361038,2.53723740090031	NA	NA	-27.5	0.913551	NA	NA	-20.1	0.809812	NA	NA	39.4	0.0449655	2.47017	3.04643	2.80176	2.72933
MLLT10	both	ENSG00000078403	1386	66972	chr10	+	21971153	21971186	21970260	21970305	22002700	22002879	-22.6	-9	33	45	179	848	31514	ACGGTAAGT	11.81	CTTTTTTCCTTACTTAAAAGCGT	7.12	ctagtaagt	8.78	TAACATTTGTTTTTTTGCAGGTA	10.8	none	GAGTTGCTGAATGCAATACACAACGGTAAGTTTTA	10.78468457911,11.3566428610902	9.21291845745035,9.65499774355671	10.0642081837297,10.5751373275088	6.43843569137309,6.78062023419176	-0.866667	0.79257	-5.9	0.21059	-22.6	0.0305988	-20	0.0242995	-9	0.373504	-44.3	1	11.0707	9.43396	10.3197	6.60953
GMFG	MATS_only	ENSG00000130755	NA	56493	chr19	-	39825900	39825950	39826613	39826726	39823716	39823766	-19.9	-4.4	50	113	50	663	2134	CAGGTGATG	5.99	TGTGTGCCACCCCTCCCCAGTGA	8.01	ATGGTCAGG	2.92	CTTCTGTTTTCTTGCCTCAGAAC	9.21	none	GGTGGTGCTGGAGGAAGAATTTCAGGTGATGGGCT	114.394	78.4931	326.963	321.504	NA	NA	-2.2	0.795481	NA	NA	-19.9	0.0311994	NA	NA	-4.4	0.522564	114.394	78.4931	326.963	321.504
AURKA	MATS_only	ENSG00000087586	NA	15519	chr20	-	54963367	54963562	54965611	54965721	54963211	54963258	-19.6	-42.3	195	110	47	2049	109	CCGGTGTGT	6.56	agaggacttttttaaggtagcag	-5.87	gaggtgggt	7.07	GTTCTTCTTTTTCTTTTCAGGCA	11.15	none	ATTTGGACAAAACATGTAAAATCCGGTGTGTTGTG	29.2351233774358,32.1339067574353,30.7468316456036,30.5544922161851,26.8476456929024,32.3467140869547	22.2847353060815,24.4943589666,23.43704850761,23.2904360504579,20.4648590031114,24.656573264392	13.3814392117845,14.7082642464116,14.0733751422499,13.9853379429687,12.2886479451762,14.8056699698978	10.5803492885977,11.6294346738863,11.1274446879631,11.0578360080563,9.71630820024733,11.7064507975544	NA	NA	19.7	1	NA	NA	-19.6	0.0408857	NA	NA	-42.3	1	30.3108	23.1047	13.8738	10.9696
SAC3D1	MATS_only	ENSG00000168061	NA	9360	chr11	+	64810496	64810636	64808412	64808578	64811696	64812300	-19.6	-18.2	140	166	604	1918	1060	atggtaatt	6.49	taaaaaaattttttttgtagaga	6.19	TGGGTGAGA	6.04	CTGGCTTCCCGCTCTCACAGGCT	9.62	none	acactgttcctctgaagaaggcatggtaattatcc	19.6545	17.6744	10.3727	16.9452	NA	NA	6.8	0.597193	NA	NA	-19.6	0.00280648	NA	NA	-18.2	0.378598	19.6545	17.6744	10.3727	16.9452
UBR3	MATS_only	ENSG00000144357	NA	1203	chr2	+	170870350	170870482	170865349	170865450	170871790	170871876	-19.6	-7.7	132	101	86	4900	1308	CTGGTAGGT	8.37	CCATTAATTTTTTTCTACAGATT	10.69	TAGGTAGGT	7.92	ATATAATGTTTTACTTACAGAAC	8.32	none	AATCCTTGTCCCTGCTTCCTTGCTGGTAGGTTTTT	4.72042	3.79558	3.3386	2.88844	NA	NA	-14.3	1	NA	NA	-19.6	0.0298414	NA	NA	-7.7	1	4.72042	3.79558	3.3386	2.88844
RWDD1	MATS_only	ENSG00000111832	NA	15152	chr6	+	116894020	116894148	116892582	116892818	116895220	116895334	-19.6	-5	128	236	114	1202	1072	TGGGTGAGT	8.73	TTGTTCTGCTTTGCCAACAGGCA	9.71	CAGGTGACT	6.6	TCTTTTTGCCTATTCTGTAGCTT	6.62	none	GGGGTTTGAGAGTGTCATTAACTGGGTGAGTGTGT	23.395211770661,28.701342275347,25.9308486094795	15.4937193118518,19.0077587434059,17.172970854542	22.7676603307592,27.9314595810345,25.2352814335002	21.4979500035649,26.3737737157137,23.8279564391757	NA	NA	-22.7	0.282351	NA	NA	-19.6	0.0237255	NA	NA	-5	0.0753564	26.0091	17.2248	25.3115	23.8999
FAM122B	MATS_only	ENSG00000156504	NA	23937	chrX	-	133906172	133906313	133915850	133915947	133905125	133905384	-19.5	-11.6	141	97	259	9537	788	CAAGTGACT	1.62	TCTTTTTGCTTTGTCTTCAGTTC	9.24	ATGGTAAAA	4.79	AATATTGTTGATATTTCTAGGTG	6.8	none	TCTTGATGGATGATCTCTCACCCAAGTGACTTAAC	12.8307086628763,25.0349590845793,13.0303796334225,14.2068513431361,22.4362064053156	12.1331570887981,28.4203520972236,12.3219727898918,16.1367285782912,25.4701788651143	10.3063992575402,21.722685870521,10.4667870269659,12.3234236474973,19.4677635470572	10.4820930542536,23.9600605433037,10.6452149634552,13.6143728007988,21.4728876535111	NA	NA	-23.2	0.0747762	NA	NA	-19.5	0.00320748	NA	NA	-11.6	0.0909088	17.5078	18.8965	14.8574	16.0349
RP11-46F15.2	MATS_only	ENSG00000238260	NA	789	chr1	-	3540871	3541014	3541195	3541307	3539753	3540120	-19.2	-22.4	143	112	367	181	751	CATGTGTGT	2.6	TATTCGTGACGGATCCACAGAGC	2.94	CAGGTGGGG	6.92	ATGtggtctttgtcccacaggga	10.68	none	GCGCTCGCAGTTCGAGGTGGAACATGTGTGTGCCC	not_in_refSeq	not_in_refSeq	not_in_refSeq	not_in_refSeq	NA	NA	5.5	0.318832	NA	NA	-19.2	1	NA	NA	-22.4	0.0265119	not_in_refSeq	not_in_refSeq	not_in_refSeq	not_in_refSeq
MTA1	both	ENSG00000182979	248	7423	chr14	+	105915695	105915746	105911754	105911848	105916394	105916521	-18.1	-6.2	51	94	127	3847	648	AAGGTAAGA	10.57	GCTGTCTGTCTGTTATATAGCCC	6.47	CAAGTGAGT	9.1	AGGGGCTCCTTGTCCTTCAGGGG	6.97	none	CCGGGGGCGGACAACGGCGAGGAAGGTAAGAGCCG	41.2085839206719,41.9020330593298	47.0637188125998,47.8556968950173	41.4767755492492,42.1747377586351	42.9181409060019,43.6403580999089	20.76	1.99e-05	14.6	0.024531	-18.1	0.0054786	-19.2	0.0716954	-6.2	0.238812	-6	0.395705	41.5553	47.4597	41.8258	43.2792
SNAP25	MATS_only	ENSG00000132639	NA	48263	chr20	+	10279915	10280060	10258332	10258374	10286776	10288066	-19.1	-17.5	145	42	1290	21541	6716	AAGGTGAGC	9.6	ACTTGCTCTTTGGATCCCAGGGT	6.85	GAGGTAAGA	10.06	TTCTTTTCCCCCTTTTCTAGGCT	11.63	none	CCAGATCGACAGGATCATGGAGAAGGTGAGCACGT	4.0401125545444,4.0401125545444	3.05896233143169,3.05896233143169	3.94057423912864,3.94057423912864	1.70106142365545,1.70106142365545	NA	NA	0.4	0.710992	NA	NA	-19.1	0.0397922	NA	NA	-17.5	0.0363082	4.04011	3.05896	3.94057	1.70106
SLC27A5	MATS_only	ENSG00000083807	NA	70388	chr19	-	59010151	59010282	59010489	59010587	59009703	59010058	-19.1	-14.4	131	98	355	207	93	CAGGTGAGC	9.6	GTGACCAGACTGCTCTCTAGGTT	2.08	CAGGTGCGG	9.13	CCATGGTCACTGCCCTGCAGGAC	7.22	none	TACCCCCCATTTCATCCGCATCCAGGTGAGCCCAG	6.7921	13.1309	5.51084	15.8181	NA	NA	2.5	0.870485	NA	NA	-19.1	0.00168939	NA	NA	-14.4	0.0343678	6.7921	13.1309	5.51084	15.8181
MPI	MATS_only	ENSG00000178802	NA	72399	chr15	+	75189351	75189560	75188492	75188666	75189852	75191798	-18.9	-23.7	209	174	1946	685	292	GAGGTGAGT	10.03	CATGACGACTGTCTCTCCAGACT	6.08	GAGGTGAGC	8.7	TATCATTTCTTCCTGCCCAGGTC	9.5	none	AGACTTCACCATTATGAAGACGGAGGTGAGTGAGG	15.9222	27.9638	15.8476	29.2409	NA	NA	-1.8	0.732917	NA	NA	-18.9	0.0385863	NA	NA	-23.7	0.0385259	15.9222	27.9638	15.8476	29.2409
RFC5	MATS_only	ENSG00000111445	NA	56225	chr12	+	118455494	118455858	118454526	118454697	118456876	118456941	-18.9	-15.7	364	171	65	797	1018	catgtaagt	8.31	TACGTAttttttttttttagaga	8.72	CTGGTAGGA	6.77	CATACTAAATTGTATTTCAGGGT	7.5	downstream	gatttgcctattctggacatttcatgtaagtggaa	19.082387479782,22.3758863146045,22.4717829702386,21.114426951902	17.5299535142346,20.5555121103377,20.6436071622392,19.3966778705603	10.0948132186972,11.8371138406061,11.8878443284944,11.1697866173773	9.41455903346085,11.039452105144,11.0867640427375,10.4170937314312	0.766667	0.254339	-2.5	0.360245	NA	NA	-18.9	0.00171073	NA	NA	-15.7	1	21.2611	19.5314	11.2474	10.4895
MIR15A	MATS_only	ENSG00000231607	NA	66759	chr13	-	50619241	50619368	50623719	50623798	50618656	50618904	-18.8	4.7	127	79	248	4351	337	AATGTATTT	-1.24	TACTAATCTTTTTCATTTAGGTT	8.83	AAGGTAAAG	9.06	GTGTTTTTTTCCTTTTGCAGGTG	13.98	none	GAGTATCCAGGAAGTAGCAAGAAATGTATTTCAGT	89.5457	66.3521	47.4628	34.3076	NA	NA	-20.8	0.121423	NA	NA	-18.8	0.0313056	NA	NA	4.7	0.86249	89.5457	66.3521	47.4628	34.3076
TGIF2,TGIF2-C20ORF24	MATS_only	ENSG00000118707	NA	21738	chr20	+	35219312	35219412	35207229	35207369	35219907	35220326	-18.7	-59.6	100	140	419	11943	495	GGGGTAAGG	8.05	GTCTTGTATATTCATTCCAGATA	7.42	CAAGTAAGG	7.66	TTTGGTTCCCTTTCATACAGAGG	6.6	none	CAGTTTACCATTTCCCGCCGCGGGGGTAAGGCCTC	6.14520325172329,6.09906727922101,6.07215212579675,6.30618870276211,49.8313169570935	6.1811583539322,6.10972310497337,6.10767981159784,6.34308571821769,47.9302337307188	9.09914552208354,9.03484387324847,8.99097939671229,9.33751518797371,56.6811216432571	7.62138412205825,7.58083015630515,7.53078489068557,7.821040978011,59.0498024155094	NA	NA	1.3	0.824847	NA	NA	-18.7	0.0504957	NA	NA	-59.6	0.00177647	14.8908	14.5344	18.6287	17.9208
BRD8	both	ENSG00000112983	3025	17230	chr5	-	137495243	137495288	137495757	137495862	137492603	137492956	-11.3	2.6	45	105	353	469	2287	TTTGTAAGT	7.4	GTTTGTTTGTCCTCTAACAGGAC	10.12	AAGGTGAGG	9.16	TTTCTCTGCCTGTCATCTAGGAT	9.64	none	TCCTGCCTTCCTTCTCTCTCTCTTTGTAAGTATTG	31.6838370234494,34.3950378425701,25.2308182886172	33.2021663408076,36.0432913129237,26.4363390555583	28.7411474093688,31.200540895741,22.8833959821473	29.9205935086119,32.4809127517985,23.8664313339441	-29.2	5.84e-11	-22.2	0.00159697	-11.3	0.00501582	-18.6	0.00205023	2.6	0.66893	-14.3	0.00826099	30.4366	31.8939	27.6084	28.756
C11orf30	MATS_only	ENSG00000158636	NA	15784	chr11	+	76170979	76171129	76169226	76169402	76174864	76175124	-18.6	-13.2	150	176	260	1577	3735	AAAGTAAGT	9.72	TTTTATCGTTCCTTCAGTAGTGG	3.85	AAGGTGAGT	10.47	GTATTGTCATTGCCCTTCAGGTG	9	none	AGTGGAAGTACTGTTTATGTCAAAAGTAAGTGATA	10.6883	8.10831	8.00439	5.58835	NA	NA	-6.3	0.203593	NA	NA	-18.6	0.0192208	NA	NA	-13.2	0.805308	10.6883	8.10831	8.00439	5.58835
WNK1	MATS_only	ENSG00000060237	NA	37930	chr12	+	988738	989197	987377	987527	989886	989980	-18.5	-10.4	459	150	94	1211	689	CAGGTATTG	8.35	GTTTTTCTTTACCTTCCCAGCTT	7.24	CAGGTAAAC	7.82	CTTCCTCATTTCTGTCACAGGGC	10.47	none	TTCCTCTGGAGATGTTCTGTACCAGGTATTGTGTT	13.7310006854506,13.7604032565115,14.755702229141	10.7320176696231,10.7549984355109,11.5329145106397	16.6833831468128,16.7191077359923,17.9284117398586	10.2692564068991,10.2912462493122,11.0356188253244	NA	NA	-8.3	0.457781	NA	NA	-18.5	0.0334995	NA	NA	-10.4	0.161797	14.0824	11.0066	17.1103	10.532
HCFC1R1	MATS_only	ENSG00000103145	NA	1401	chr16	-	3073474	3073531	3074181	3074287	3073233	3073362	-18.5	-2.9	57	106	129	650	112	GCAGTGAGT	7.39	AGGCTCTCTTTTTTTCCCAGCTC	6.4	GAGGTGAGC	8.7	TCTCTGCCATCTCTCCCCAGGGA	12.26	none	CCAAGCGGCGCCTGGAGGAGGAGCAGTGAGTTTGG	24.7100629097463,31.357947855008,26.2036722266663	24.8207881032634,31.4984620599789,26.3210902473631	16.7912075415236,21.3086390120858,17.8061585806189	25.9340885415509,32.9112798750646,27.5016845615598	NA	NA	2.9	0.704322	NA	NA	-18.5	0.0320898	NA	NA	-2.9	0.627978	27.4239	27.5468	18.6353	28.7824
FLJ31306	MATS_only	ENSG00000257621	NA	1517	chr14	-	58760483	58762529	58764672	58764838	58758352	58758425	-18.4	-36.6	2046	166	73	2143	2058	TAGGTGtgt	4.3	attttatttttgagacagagtca	-21.28	AAGGTCAGT	8.68	ACAAGTCTTTTGTCTTTTAGAAT	8.27	none	gacagaCTTCATCTCAAATATATAGGTGtgtgtgt	19.4510878312431,19.1299059540457	20.3321872348889,19.9964563945222	21.9179712747538,21.5560555187067	21.8800646831072,21.518774851449	NA	NA	15.8	0.541603	NA	NA	-18.4	0.243387	NA	NA	-36.6	0.0333557	19.2905	20.1643	21.737	21.6994
NICN1	MATS_only	ENSG00000145029	NA	63121	chr3	-	49463315	49463429	49463684	49463861	49462799	49462871	-18.4	-7.2	114	177	72	255	444	AAGGTAAGT	11	TCCTTGTGTGTGTGTGTCAGATG	9.59	CAGGTCAGC	7.16	AGTACATCTTTGCTTTGCAGAGC	7.63	none	GCAGATCTATCAGCAGGGACCAAAGGTAAGTGACT	9.00441	11.7314	10.5363	14.595	NA	NA	2.1	0.496013	NA	NA	-18.4	0.017964	NA	NA	-7.2	0.0229471	9.00441	11.7314	10.5363	14.595
CD47	MATS_only	ENSG00000196776	NA	39221	chr3	-	107770785	107770817	107776323	107776416	107762145	107766139	-18.3	-12.6	32	93	3994	5506	4646	AGGGTAAGT	10.45	ttatttgttatttatatCAGCTT	5.73	TGGGTAAGT	10.24	TTCATTTTTCAATTTTCCAGAAT	8.53	downstream	TCAGAAGACTATACAACCTCCTAGGGTAAGTTAAA	65.4305778585283,66.1482354825439	55.58440020795,56.1940626913201	39.9177254721946,40.3555522644388	40.7461300997995,41.1930430244948	NA	NA	4.1	0.377013	NA	NA	-18.3	0.00222353	NA	NA	-12.6	0.00488223	65.7894	55.8892	40.1366	40.9696
ARID1B	MATS_only	ENSG00000049618	NA	25515	chr6	+	157495980	157496139	157495141	157495251	157502102	157502312	-18.2	-14.8	159	110	210	729	5963	CCTGTAAGT	7.52	TTTTTATTCCTCTACCACAGGAT	9.72	AAGGTACTT	8.4	ATGCTGCTTCTGGGTACTAGAAG	2.73	none	CTGGCCAAAGACTCCATCAAGCCCTGTAAGTGGCT	10.030040501568,9.98945411647137	8.28569502655358,8.25216710519691	9.5699732372664,9.53124850638308	7.47220346332815,7.44196732148651	NA	NA	-17.5	0.616077	NA	NA	-18.2	0.0126512	NA	NA	-14.8	0.107178	10.0097	8.26893	9.55061	7.45709
NAP1L4	both	ENSG00000205531	705	60216	chr11	-	2970456	2970494	2972488	2972545	2965666	2966876	-14.6	-1.4	38	57	1210	1994	3580	TAGGTAAGG	9.31	CAATTTTTTTCCCCATTTAGGTG	10.38	AAGGTTGGT	8.46	CTTGTCTTTTTCATTGACAGAAG	8.32	none	CTGTTAATCATTCATACGTTTCTAGGTAAGGTGGA	66.694	50.1197	51.3904	46.6033	0.913333	0.418973	-7.4	0.615048	-14.6	0.0199738	-18.2	0.755608	-1.4	0.818533	13.4	0.743109	66.694	50.1197	51.3904	46.6033
ATP11C	both	ENSG00000101974	2074	6933	chrX	-	138813809	138813914	138820074	138820228	138808507	138811121	-9.3	-0.3	105	154	2614	6160	2688	CAGGTACCT	8.16	TCTTTGCCTCACTATTACAGAGA	7.75	AGGGTAAGA	9.21	GTATATTTTACATTTTTCAGAAT	7.2	none	AGACGAATCTAATGTATTGTAACAGGTACCTAGTG	4.27007799971476,4.34464280762596	3.95253770994353,4.02155757682264	3.03675340351832,3.0897816934517	2.23104366307163,2.27000251632666	-8.86	0.0390675	-17.5	0.0585022	-9.3	0.478929	-18.1	0.00538942	-0.3	0.987883	-4.7	0.276314	4.30736	3.98705	3.06327	2.25052
METTL5	MATS_only	ENSG00000138382	NA	7494	chr2	-	170671986	170672038	170676070	170676153	170668966	170669016	-18	-21	52	83	50	4032	2970	CAGGTAAGA	10.77	AACATATTATTTATGTTCAGCAT	4.64	GAAGTAAGT	9.82	AGGTGGCTTTTGTTTTACAGAAC	8.05	none	AAAATCAAGATAGATATTATAGCAGGTAAGACAAA	30.5157	28.8723	24.2728	28.476	NA	NA	0.3	0.863585	NA	NA	-18	0.00884754	NA	NA	-21	0.025094	30.5157	28.8723	24.2728	28.476
ILDR2	MATS_only	ENSG00000143195	NA	15723	chr1	-	166905827	166905974	166925969	166926089	166896303	166896417	-17.9	50.9	147	120	114	19995	9410	CCTGTGAGT	7.21	TTCTTTGTGCATCCTTCCAGAGT	8.53	TGGGTAAGT	10.24	TCTTGTGCTTTTCTCAACAGTTC	10.56	none	GATTCCTGCTGCTGCCCTCAAGCCTGTGAGTACAG	2.8574	2.59117	1.65421	1.56779	NA	NA	-46.7	0.760696	NA	NA	-17.9	0.0809394	NA	NA	50.9	0.0279141	2.8574	2.59117	1.65421	1.56779
VPS29	MATS_only	ENSG00000111237	NA	58471	chr12	-	110936624	110936664	110937261	110937354	110933816	110934008	-17.8	-48	40	93	192	597	2616	CAGGTACTT	8.17	TGTACTTCAATCCATATCAGAAG	3.9	AAGGTCTGT	6.43	CTCACCTTGACACTTTAAAGTTG	3.29	downstream	AAAATGAAGATTGTTCTATATCCAGGTACTTTTAT	43.1332779462411,42.6631604754373	42.6754369599554,42.2103095816452	29.9786267134227,29.6518841879358	33.4184504283619,33.0542166362272	NA	NA	44	0.0490172	NA	NA	-17.8	0.0185706	NA	NA	-48	1	42.8982	42.4429	29.8153	33.2363
CSNK1G3	both	ENSG00000151292	2442	45760	chr5	+	122941032	122941056	122940417	122940524	122950035	122950254	-16.5	-18.9	24	107	219	508	8979	GTGGTGAGT	8.95	TTTTTTGTGTGTGCGTATAGCTG	7.49	CAAGTATGT	7.44	AGTGTTTCCCTCATCTGCAGGTG	10.75	none	GCTGCCAGAAAGTGTTGAACATGTGGTGAGTCTCA	4.62972357548388,4.55459621523262,4.53009267137125,4.65531983574917	3.24504968418101,3.19239167713548,3.17521673872453,3.26299052555866	3.86699272460052,3.80424233556035,3.78377566529507,3.88837209004407	1.98877093868904,1.95649879363932,1.94597290907367,1.99976621685733	NA	NA	-8.5	0.329057	-16.5	0.23651	-17.7	0.00568635	-18.9	0.165414	-9.7	0.279533	4.59243	3.21891	3.83585	1.97275
SNHG21	MATS_only	ENSG00000250988	NA	8326	chr15	+	83425481	83425537	83423380	83423536	83425655	83425691	-17.7	-2.5	56	156	36	1945	118	CAGGTAAAG	9.65	TCTTTTTCCCCTTTGTTAAGGTG	8.62	GAGGTGAGT	10.03	TTTGCTTTGTTTTTTAACAGACT	9.67	none	TCTCAGGAGTTATAAAGTGATACAGGTAAAGCTAA	not_in_refSeq	not_in_refSeq	not_in_refSeq	not_in_refSeq	NA	NA	-6.9	0.355547	NA	NA	-17.7	0.0265938	NA	NA	-2.5	0.623106	not_in_refSeq	not_in_refSeq	not_in_refSeq	not_in_refSeq
RNF213	MATS_only	ENSG00000173821	NA	37391	chr17	+	78252562	78252709	78247039	78247203	78261613	78262162	-17.7	20.9	147	164	549	5359	8904	CAGGTAGTC	5.3	AGGGGGTCGTGTTTCAACAGGGA	6.32	GAAGTGAGT	7.97	GTGTCTCTCTTTCTGTTTAGAGC	10.25	none	CGTGCCTTCTGCAGACTGTGAGCAGGTAGTCCGAG	4.44981546412373,7.04363789814733	5.81773391436859,9.5763885080376	8.74718458170879,14.337826306464	9.15115582254656,14.4696256853789	NA	NA	-19.5	0.0205644	NA	NA	-17.7	0.422188	NA	NA	20.9	0.00116214	5.74673	7.69706	11.5425	11.8104
UPF3A	both	ENSG00000169062	5693	26372	chr13	+	115051776	115051875	115048311	115048418	115051993	115052104	-12.9	-1.5	99	107	111	3358	118	ATGGTGAGC	8.27	AACATGTTTCCTGTTAAAAGGCC	5.51	AAGGTTGGA	5.64	TCCTACTTTTTAATGTCTAGATC	7.58	none	GCCAAGACTGGAAGCATCGAAGATGGTGAGCCCTT	13.8221677114465,13.2486578189766	13.91374768703,13.3364379548355	15.4554039256465,14.8141277359403	14.2460462503917,13.6549487739505	-1.67333	0.50215	14.1	0.877755	-12.9	0.0180054	-17.6	0.137385	-1.5	0.810203	-15.3	0.223915	13.5354	13.6251	15.1348	13.9505
HMGN5	MATS_only	ENSG00000198157	NA	44589	chrX	-	80375286	80375316	80377033	80377171	80374228	80374258	-17.5	6.7	30	138	30	1717	1028	GAGGTGAGT	10.03	TGGTTTTCTCCTCTGTGTAGGCT	9.33	AAGGTAAGT	11	TTTTTGTTTTTAACTTATAGCCA	8.22	none	AGGTCAAGGTGATATGAGGCAGGAGGTGAGTTTCT	11.8079	10.082	8.27918	12.2728	NA	NA	8.5	0.159653	NA	NA	-17.5	0.0102676	NA	NA	6.7	0.709346	11.8079	10.082	8.27918	12.2728
LRRC28	MATS_only	ENSG00000168904	NA	63178	chr15	+	99874222	99874334	99828018	99828156	99901540	99901714	-17.5	NA	112	138	174	46066	27206	TTGGTAAGT	10.47	ACATGTGCCTTTCTCTGCAGTAC	9.11	CAGGTAATC	6.99	GAATGTGTGTCTTTCTGCAGCTG	9.65	none	AACCGTCTTGCATTTTTGCCACTTGGTAAGTGATT	16.4507	13.663	11.0313	7.92092	NA	NA	NA	NA	NA	NA	-17.5	0.0274928	NA	NA	NA	NA	16.4507	13.663	11.0313	7.92092
C16orf13	MATS_only	ENSG00000130731	NA	13131	chr16	-	685611	685774	686093	686347	684718	684797	-17.4	-17.1	163	254	79	319	814	GAGGTCTGT	5.39	CAAGCGTTCGCCTCCTGCAGCAT	6.63	CAGGTGCGG	9.13	CATCTCCCCACCCTCTGCAGGAA	10.03	none	TGTCAGCCCCCTGCGCTGCACGGAGGTCTGTGGGG	57.5153133270003,62.5814290086531,67.8551449363486,79.3314666579314,88.0015723036069	55.6416764519829,60.5427567612249,65.6446744658225,76.7471399337695,85.1348055003017	47.8190067875959,52.0310436548971,56.4156821651412,65.9572507415115,73.1656934455019	86.6391272354902,94.2705529505334,102.214700671084,119.502244462745,132.562599048838	NA	NA	10	0.174881	NA	NA	-17.4	0.0245577	NA	NA	-17.1	0.00646913	71.057	68.7422	59.0777	107.038
ACAP1	MATS_only	ENSG00000072818	NA	28846	chr17	+	7240630	7240688	7239847	7240106	7245266	7245386	-17.3	-22.5	58	259	120	524	4578	AAGGTGACC	6.78	CATGACCCCCTCTTTCCCAGAGC	8	CCGGTAAGT	10.91	TTACCCTCCTTCTTTCCCAGCTC	10.14	none	AGAATTGGAGACCCGTCTGGAAAAGGTGACCCTGA	52.7402	47.9044	95.597	119.738	NA	NA	-0.1	0.798899	NA	NA	-17.3	0.00598697	NA	NA	-22.5	3.02e-05	52.7402	47.9044	95.597	119.738
HES6	MATS_only	ENSG00000144485	NA	39677	chr2	-	239148301	239148388	239148465	239148612	239148127	239148209	-17.3	-20	87	147	82	77	92	gaggtgcgg	6.79	CAGTGCCCCGCTCCCCGCAGGCC	9.34	AAGGTGCGG	8.17	CGCCCTTCCCGCCCGCGCAGGTG	10.77	none	GCGGCTGCTGCTggcgggcgccgaggtgcggcggc	19.4669	20.2664	14.8612	20.5972	NA	NA	-4.5	0.565016	NA	NA	-17.3	0.00353802	NA	NA	-20	0.012653	19.4669	20.2664	14.8612	20.5972
RABL2B	MATS_only	ENSG00000079974	NA	36972	chr22	-	51221466	51221714	51221928	51222091	51220615	51220779	-17.3	-12.5	248	163	164	214	687	CAGGTGAAA	5.07	AAGATAGCTTACCCACTTAGATG	0.41	CACGTGAGG	5.78	CCTCTTGTTGATCTTCCCAGACA	6.79	none	CTGTCGCTCTCTCTACAGGGTACAGGTGAAAGGGG	7.44006425986528,7.15625540991964,7.96664415040369,7.35537550142668,7.97757233167996	10.6889799053202,10.2812378498671,11.4455058803543,10.567309392064,11.461206162769	12.2955347940294,11.8265090615254,13.1657667086753,12.1555771888697,13.1838267453127	12.4171389267878,11.9434744804419,13.2959775266289,12.2757971261878,13.3142161789289	NA	NA	31.8	0.0498178	NA	NA	-17.3	0.485515	NA	NA	-12.5	0.0248747	7.57918	10.8888	12.5254	12.6493
TMEM39B	MATS_only	ENSG00000121775	NA	63808	chr1	+	32542764	32542919	32542363	32542447	32557275	32557612	-17.3	-5.7	155	84	337	317	14356	TCCGTGAGT	8.93	CCTATCTTGCCCCGACCCAGGCC	5.31	GAGGTGATT	5.41	ACCACCGTCTTCCCCAGCAGGTT	9.21	downstream	TGAACCTCCTGTTCCTCTGCTATCCGTGAGTACCC	13.1566	12.055	14.6974	13.4003	NA	NA	-1.9	0.629795	NA	NA	-17.3	0.0416806	NA	NA	-5.7	0.233116	13.1566	12.055	14.6974	13.4003
MITD1	MATS_only	ENSG00000158411	NA	19518	chr2	-	99787805	99787892	99787972	99788109	99786997	99787115	-17.2	-16.1	87	137	118	80	690	GAAGTAGGT	6.22	TCCATTCTAATGTCTTTTAGCTG	8.45	CAGGTATGT	9.8	CGTATTTTTGCTATTAACAGGGC	7.31	none	TCACCTTCTCACCTCTCTGGATGAAGTAGGTACCT	13.8656	13.7615	15.408	13.5657	NA	NA	13.6	0.38124	NA	NA	-17.2	0.0384095	NA	NA	-16.1	0.0413504	13.8656	13.7615	15.408	13.5657
PRR14	MATS_only	ENSG00000156858	NA	19249	chr16	+	30665949	30666535	30665550	30665660	30666671	30666741	-17.2	-10.4	586	110	70	289	136	CAGGTAGTG	6.13	TGACCCTCTCCTTTCCTCAGCCC	8.99	CAGGTAAGG	11.08	AGCCTTGACCTTCTTGGCAGGTT	6.8	none	CCTTCTCCGAACCAGCAGAACCCAGGTAGTGCTCT	9.26451	9.00593	10.3532	11.3216	NA	NA	3.7	0.390982	NA	NA	-17.2	0.0333018	NA	NA	-10.4	0.159059	9.26451	9.00593	10.3532	11.3216
MRPL55	MATS_only	ENSG00000162910	NA	18011	chr1	-	228296137	228296722	228296849	228297000	228295947	228296022	-17.1	12.1	585	151	75	127	115	TTGGTGAGT	9.27	AAGCCCTTGTCCCCATGCAGTCT	4.9	CAGGTTGGC	5.52	TCTCTTCATTCTCTGCCTAGCAG	6.99	within	GTCCAAGGGTTGCTGGGAGAGGTTGGTGAGTGGCG	34.1600847125903,32.3770033677023,34.3592688800106,34.5101880698204,27.2490849152454,40.7793398818119,36.5433464367245,31.136669024686	28.3685769407108,26.8877995729264,28.5339913835137,28.6593237029142,22.6292694671566,33.8656022302602,30.3477799830859,25.8577517689437	28.8063253678205,27.3026984942254,28.9742922795862,29.1015585707117,22.9784560737527,34.3881738820002,30.8160689981335,26.2567562797835	36.655146070349,34.7418280062374,36.8688787004968,37.0308210666776,29.2393650734576,43.7578733365758,39.2124818426989,33.4108993243604	NA	NA	-12.8	0.633793	NA	NA	-17.1	0.0495132	NA	NA	12.1	0.657899	33.8894	28.1438	28.578	36.3647
UBR1	MATS_only	ENSG00000159459	NA	11419	chr15	-	43262717	43262805	43268914	43269065	43258350	43258484	-17	-5.9	88	151	134	6109	4233	TGGGTGAGT	8.73	TTGCAGAATTTCTTTTTCAGGCC	7.59	CAGGTAAGG	11.08	CTGGAATTATTGTCTCCTAGCTC	3.63	none	CAGAAATTTCTCAATATACAAGTGGGTGAGTAACA	5.85032	4.36994	5.92055	4.07443	NA	NA	-1	0.655198	NA	NA	-17	0.0409457	NA	NA	-5.9	0.0955081	5.85032	4.36994	5.92055	4.07443
PEX5	both	ENSG00000139197	1089	20924	chr12	+	7354836	7354947	7354346	7354437	7355207	7355300	-19.3	-0.8	111	91	93	399	260	CAGGTAGGA	9.79	TGTGTGTCTCTGTGCCCCAGTTC	8.67	GAGGTGAGC	8.7	ACCATCCTTTTTTGTCGCAGGGT	9.88	none	GGCAGCAGAGTTTATACAGCAGCAGGTAGGACATT	49.1458485790269,43.6492541842925,60.6974996588591,51.6446889983677,49.2077345265754	30.3444963643554,27.1951030161113,37.9663397827593,32.17655521938,30.6582422689192	26.6473516740703,23.7144751847418,32.9582792085574,28.0583647662009,26.7343765921152	18.3122644094057,16.271089982058,22.6409427198061,19.2515404327398,18.3431192870933	-3.47333	0.377979	-2.1	0.931175	-19.3	0.0230798	-16.9	0.0430285	-0.8	0.876384	-9.8	0.209301	50.869	31.6681	27.6226	18.9638
C3orf67	MATS_only	ENSG00000163689	NA	40626	chr3	-	58899423	58899590	58923373	58923488	58870270	58870435	-16.8	-11.7	167	115	165	23783	28988	CAGGTTGCT	-0.98	TTTGCATCTCTCTATTTTAGTGG	9.44	ATTGTAAGT	8.54	ATGTTTGTCTTTATTTCCAGCTG	10.16	none	CTGCTGATAAGGATGGTATGTTCAGGTTGCTATCA	5.03211	4.66088	2.60382	3.20744	NA	NA	-14.3	0.0255673	NA	NA	-16.8	0.0109488	NA	NA	-11.7	0.666003	5.03211	4.66088	2.60382	3.20744
NKIRAS1	MATS_only	ENSG00000197885	NA	17122	chr3	-	23952819	23952937	23958274	23958460	23952301	23952412	-16.8	-2.4	118	186	111	5337	407	caggtgagt	10.67	gtttgtttgttttcagacagagt	2.14	CAGGTTTGT	7.44	ACCTGTTATTCTCTCCACAGTGA	10.57	none	gcctccccagtagctgggattacaggtgagtgcca	2.89475	1.80306	2.27616	1.51484	NA	NA	-10.5	0.124703	NA	NA	-16.8	0.0479708	NA	NA	-2.4	1	2.89475	1.80306	2.27616	1.51484
TXLNG2P	MATS_only	ENSG00000243209	NA	41206	chrY	+	21757900	21758020	21755284	21755479	21759476	21759551	-16.7	-24.2	120	195	75	2421	1456	TTTGTAAGT	7.4	GAAATTCTGTTTTCCTGTAGCAA	7.39	GAGGTAAAC	7.2	AGAATGTATCTGTTTTCTAGTTA	5.26	none	AAGACATCAGAGAGAGAGAGAGTTTGTAAGTTCTA	30.5139	19.1971	32.4422	19.7881	NA	NA	6.6	0.472582	NA	NA	-16.7	0.0195633	NA	NA	-24.2	0.00266825	30.5139	19.1971	32.4422	19.7881
LRRC23	MATS_only	ENSG00000010626	NA	56062	chr12	+	7019053	7019190	7016478	7016609	7023054	7023392	-16.6	20.7	137	131	338	2444	3864	GAGGTATGC	9.12	ACTGTGCCCTGGGGGTCTAGGCC	5.44	CTGGTAGCT	1.65	CTTCTGTCTTCTACCTCCAGGAG	11.37	none	AATCATTGCAGTACCTCAACCTGAGGTATGCACCC	7.37861815921269,9.03187245353253,6.67355020177681	5.52850857174104,6.76722703368001,5.00022886377468	6.17242430161421,7.555418618818,5.58261486834885	5.74495978013235,7.03217633237252,5.19599695669748	NA	NA	-34.2	0.0422301	NA	NA	-16.6	0.21114	NA	NA	20.7	0.0254515	7.69468	5.76532	6.43682	5.99104
PSMD5-AS1	MATS_only	ENSG00000226752	NA	40780	chr9	+	123607270	123607474	123605377	123605717	123609571	123609631	-16.5	-15.1	204	340	60	1553	2097	AAGGTGATG	5.22	CTGAGAGTCTATTTCCATAGGAA	4.8	GGCGTGAGT	7	ACCCTGTGCCTTTGCTTCAGGGC	10.29	none	AGAAGAGGATGTCATTTAGGTGAAGGTGATGGATA	11.8611	14.4036	19.8917	21.0607	NA	NA	-10.6	0.541689	NA	NA	-16.5	0.0103368	NA	NA	-15.1	0.342472	11.8611	14.4036	19.8917	21.0607
C11orf30	MATS_only	ENSG00000158636	NA	15797	chr11	+	76170976	76171129	76169226	76169402	76174864	76175124	-16.5	1.8	153	176	260	1574	3735	AAAGTAAGT	9.72	CTTTTTTATCGTTCCTTCAGTAG	8.14	AAGGTGAGT	10.47	GTATTGTCATTGCCCTTCAGGTG	9	none	AGTGGAAGTACTGTTTATGTCAAAAGTAAGTGATA	10.6883	8.10831	8.00439	5.58835	NA	NA	-3.4	0.212243	NA	NA	-16.5	0.0139448	NA	NA	1.8	0.689217	10.6883	8.10831	8.00439	5.58835
PTBP3	MATS_only	ENSG00000119314	NA	67877	chr9	-	115038123	115038293	115060111	115060196	115030328	115030475	-16.4	-9.5	170	85	147	21818	7648	CAGGTATGT	9.8	AAGAATCTTATGTTTTTTAGCTA	4.95	ATGGTGAGt	10.13	CCTTCTTGTGTTTATTGCAGGCT	10.56	none	TTTGATGTTGAAAGGAAAAAGCCAGGTATGTAATA	14.6260459650799,15.0405103897386,15.1047779972856,27.6486585057283,15.4345342910493,15.0574691210726	12.6993449550508,13.1442695815543,13.2004346143271,24.162838331309,13.4886166978555,13.1590902312955	14.4595158430749,14.9628575906526,15.0267933903362,27.5059109746733,15.3548471820862,14.9797287655857	9.10943479365531,9.4371111635616,9.47743563001392,17.3480458495562,9.68433996507265,9.44775185517674	NA	NA	-11.6	0.206887	NA	NA	-16.4	0.0181826	NA	NA	-9.5	0.685279	17.152	14.9758	17.0483	10.7507
RALY	MATS_only	ENSG00000125970	NA	58871	chr20	+	32664833	32665051	32664507	32664621	32666310	32666359	-16.3	-10.9	218	114	49	212	1259	CTGGTGAGG	8.3	CTCCACCCCTTCCCCTCAAGATG	5.74	CAGGTCAGC	7.16	TCTTACCTCCTCCCTATCAGGAA	9.15	none	CCTGACACACAGCGAGGAAGAGCTGGTGAGGGCCT	39.9172886118495,40.3227975755254	33.2479246912722,33.5856813865486	44.2748178332566,44.7245937604516	44.0273802361881,44.4746425116034	NA	NA	-1.9	0.678622	NA	NA	-16.3	0.00703026	NA	NA	-10.9	0.0312025	40.12	33.4168	44.4997	44.251
SLC35D1	MATS_only	ENSG00000116704	NA	38781	chr1	-	67517694	67517762	67518453	67518540	67516115	67516187	-16.1	-11.1	68	87	72	691	1507	GAAGTATGG	3.5	TCCCTTTTTAAATTTTCTAGACG	8.21	AAGGTAAAA	8.38	ATTATCTTTTTTTTTTCCAGCTT	9.67	none	GACTGTTCAGCACAAAGAAACTGAAGTATGGATAA	3.08483	2.18871	4.20601	2.76058	NA	NA	NA	NA	NA	NA	-16.1	0.0144721	NA	NA	-11.1	1	3.08483	2.18871	4.20601	2.76058
SRSF6	MATS_only	ENSG00000124193	NA	23305	chr20	+	42087792	42088060	42087000	42087149	42088410	42088535	-16	-7.6	268	149	125	643	350	GATGTAAGT	9.11	TTGATGTTTCAATTTGAAAGTGA	1.62	GCAGTGAGT	7.39	GTTCCCTTCATGTGATAAAGGTG	4.35	within	ACCACCAAAAACCTCACACTGTGATGTAAGTACTT	26.6826171582741,24.9011170590171	25.5247795868148,23.8205840389158	24.5383940405124,22.9000558235574	22.4079103817789,20.9118167140368	NA	NA	-0.1	0.715522	NA	NA	-16	0.00917346	NA	NA	-7.6	0.198886	25.7919	24.6727	23.7192	21.6599
RHOC	MATS_only	ENSG00000155366	NA	58194	chr1	-	113247721	113247823	113249699	113249724	113246265	113246428	-15.9	-27.7	102	25	163	1876	1293	GAGGTCAGT	7.7	TCTTTTGGGGCTCCTCCCAGCCC	5.07	AAGGTACCC	9.16	CAATACGTCTTTCCTGGCAGCCC	7.44	none	GCCTGGGAACTTCAGCCGGCTGGAGGTCAGTTCCC	43.6571255070994,44.5964914878813,41.5008322644438	32.6173693770023,33.2049297774184,31.0063468379807	52.0629988319906,53.1733822310531,49.4915264487356	83.9419963426515,85.7927543426787,79.7959707537875	NA	NA	15.1	0.500771	NA	NA	-15.9	0.159422	NA	NA	-27.7	0.00600133	43.2515	32.2762	51.576	83.1769
NSMAF	MATS_only	ENSG00000035681	NA	49440	chr8	-	59549792	59549948	59555542	59555632	59548026	59548105	-15.8	-16.6	156	90	79	5594	1687	caagtaagg	7.66	tacctctatcttttgaaaaggcc	4.7	AAGGTAAGG	10.51	TGTTGTACTTGGATCCCTAGGAA	7.72	none	ctgggacatcctgtcatactggcaagtaaggaagg	8.12875891059953,7.86499994595167	7.60506405887367,7.29136176548549	9.05333286205139,8.79616493779461	6.92216353673801,6.6511242847242	NA	NA	0.4	0.976668	NA	NA	-15.8	0.0354085	NA	NA	-16.6	0.218839	7.99688	7.44821	8.92475	6.78664
MRPL55	MATS_only	ENSG00000162910	NA	17999	chr1	-	228296137	228296175	228296849	228297007	228295935	228296019	-15.8	6	38	158	84	674	118	TTGGTGAGT	9.27	ttttggaaaaacctctacaggcg	2.97	CAGGTTGGC	5.52	CTTCATTCTCTGCCTAGCAGGTT	6.22	upstream	GTCCAAGGGTTGCTGGGAGAGGTTGGTGAGTGGCG	34.1600847125903,32.3770033677023,34.5101880698204,27.2490849152454,40.7793398818119,36.5433464367245,31.136669024686	28.3685769407108,26.8877995729264,28.6593237029142,22.6292694671566,33.8656022302602,30.3477799830859,25.8577517689437	28.8063253678205,27.3026984942254,29.1015585707117,22.9784560737527,34.3881738820002,30.8160689981335,26.2567562797835	36.655146070349,34.7418280062374,37.0308210666776,29.2393650734576,43.7578733365758,39.2124818426989,33.4108993243604	NA	NA	-0.3	0.511796	NA	NA	-15.8	0.00945139	NA	NA	6	0.804412	33.8222	28.088	28.5214	36.2926
KLHL20	MATS_only	ENSG00000076321	NA	40819	chr1	+	173684661	173684793	173684079	173684217	173685141	173685205	-15.7	-58.3	132	138	64	444	348	CAGGTTAGT	8.02	CTTTCCCTGCCCTGTTCAAGCTC	6.85	CCGGTAAGT	10.91	CTGCTTTTCTGTTGTCTTAGGTT	9.65	none	TCGTGTACCCTATGTGATCTATCAGGTTAGTACTG	4.80392	3.987	5.82451	4.57556	NA	NA	-4.7	0.582315	NA	NA	-15.7	0.0260117	NA	NA	-58.3	0.0953232	4.80392	3.987	5.82451	4.57556
NPIP	MATS_only	ENSG00000183426	NA	17054	chr16	+	15043906	15043967	15042786	15042894	15044076	15044112	-15.7	-35.4	61	108	36	1012	109	AAAGTAAGG	6.6	AAAGTGATTGTAATCCATAGGGA	5.43	CATGTGAGT	7.83	TCATGTGTTGGCTTTTTCAGATC	10.67	none	GGCAGAGGACTACTACAGATGCAAAGTAAGGAGCT	32.1001	31.6983	31.7001	29.3948	NA	NA	NA	NA	NA	NA	-15.7	0.148406	NA	NA	-35.4	0.00176519	32.1001	31.6983	31.7001	29.3948
FAM59A	MATS_only	ENSG00000141441	NA	14564	chr18	-	29866993	29868166	29890155	29890286	29850179	29850346	-15.6	NA	1173	131	167	21989	16647	GCCGTAAGT	10.11	TGTGATTTATTATATTGTAGGTT	8.86	AAGGTAGTA	5.69	AGTGTTCTTTTCTGCGCCAGGTC	8.53	none	TCCAGTGCCTCCCAAATCTGAAGCCGTAAGTCATT	1.41740761080593,1.41680334438098	0.888420524400601,0.888041774709937	0.666463841485555,0.666179715931419	0.327179491502366,0.327040008985028	NA	NA	NA	NA	NA	NA	-15.6	0.0345463	NA	NA	NA	NA	1.41711	0.888231	0.666322	0.32711
TRAF3IP1	MATS_only	ENSG00000204104	NA	52487	chr2	+	239241464	239241536	239237566	239237983	239242600	239242676	-15.4	-63.1	72	417	76	3481	1064	GAGGTAAAC	7.2	ATTTTTTTTTTTTTTAATAGTCA	7.75	AAGGTAAAG	9.06	TTCATTCTTTTTTCTTTAAGACT	6.91	none	TAAAGACTCCAAGGCTGAAACAGAGGTAAACTTTA	3.23021324037577,3.07705657811658	3.74779551003565,3.57009830912878	2.77845551538708,2.64671840043338	3.26663115067514,3.11174777715175	NA	NA	13.6	0.526417	NA	NA	-15.4	0.701298	NA	NA	-63.1	0.0100433	3.15363	3.65895	2.71259	3.18919
HES4	MATS_only	ENSG00000188290	NA	25731	chr1	-	935071	935167	935245	935491	934905	934993	-15.3	-26.4	96	246	88	78	78	GAGGTAAGT	11.08	AGCCGGTGCCCGACCCGCAGTCC	4.94	AAGGTGGGG	5.87	CCGCCTATCCCCGCCCCCAGAGC	8.8	none	CATCCTGGACGCCCTCAGAAAAGAGGTAAGTCGGG	51.9427067250468,56.0462885453208	52.7992067577012,56.9704538612202	21.2579531489813,22.9373756430796	36.253223814108,39.1173038659502	NA	NA	7.8	0.717605	NA	NA	-15.3	0.0347438	NA	NA	-26.4	0.0453329	53.9945	54.8848	22.0977	37.6853
MIAT	MATS_only	ENSG00000225783	NA	20372	chr22	+	27063147	27063273	27061494	27062900	27064120	27072438	-15.3	-15.5	126	1406	8318	247	847	GGGGTGAGC	5.97	tagcaagtcccttcattcagcac	1.38	CAGGTAAGC	9.88	CTCGCTGTCTTCTCCCCCAGGTG	13.04	none	GCTTTATTACAGTCTCGGCAAGGGGGTGAGCTCCT	5.53559484989467,5.60546911868717	4.66644305171887,4.72534625994534	11.6482322283846,11.7952646127542	6.73233497655699,6.81731536195532	NA	NA	-10.3	0.664687	NA	NA	-15.3	1	NA	NA	-15.5	0.0390146	5.57053	4.69589	11.7217	6.77483
DNAJB14	MATS_only	ENSG00000164031	NA	29252	chr4	-	100849698	100849774	100851606	100851691	100844196	100844342	-15	12.5	76	85	146	1832	5356	CTGGTATTG	3.14	CTTCATTTCCTCTACCCTAGCCT	6.41	CAGGTAGGA	9.79	ACACACTCTCTTGTTCACAGCAT	6.97	none	AGAGCATTGATGCCTCTTTGTTCTGGTATTGATTA	14.4562	10.6802	15.1055	9.11506	NA	NA	-10.5	0.224082	NA	NA	-15	0.0400713	NA	NA	12.5	0.671483	14.4562	10.6802	15.1055	9.11506
GAR1	MATS_only	ENSG00000109534	NA	3767	chr4	+	110737308	110737534	110736665	110736701	110739091	110739246	-14.9	-30.7	226	36	155	607	1557	TCTGTATGC	0.77	GGTCGTTTTTTTTTCATCAGGGA	7.75	CAGGCAAGT	3.1	ATTTTCTTGTCCTGTTTCAGTAT	9.68	none	CAAGGACCTCCAGAACGTGTAGTCTGTATGCAGTC	8.81118096093776,11.0751649578454	6.64271110162124,8.34951881523226	9.31211113353779,11.7048063553496	9.70781055223165,12.2021785413467	NA	NA	NA	NA	NA	NA	-14.9	0.008309	NA	NA	-30.7	0.000986492	9.94317	7.49611	10.5085	10.955
SLCO3A1	MATS_only	ENSG00000176463	NA	55486	chr15	+	92705985	92706228	92694179	92694244	92715009	92715665	-14.9	-13.3	243	65	656	11741	8781	CCAGTGAGT	8.28	CATTCTTTTCCCGGTAACAGGCT	6.65	TGGGTATGT	7.43	CTTCCCTCCTCCCCCTTTAGGCA	12.32	none	AACCACGAGGGCGGGCTGAGCACCAGTGAGTTCTT	11.479231497342,21.6248731158707	5.92956439918817,11.9355134444256	5.40909883907505,10.3661435896965	3.14408217343826,6.61785538546487	NA	NA	0.7	0.577092	NA	NA	-14.9	0.106331	NA	NA	-13.3	0.0134647	16.5521	8.93254	7.88762	4.88097
UBE2G2	MATS_only	ENSG00000184787	NA	55905	chr21	-	46194481	46194656	46197213	46197332	46193462	46193602	-14.9	-10.2	175	119	140	2557	879	AAGGTAAGT	11	TTTGTGGATGTGGATCTTAGGTG	4.76	ACAGTAAGT	9.49	GCTGCCTCTGACCCTTGCAGTCT	7.18	upstream	GTATGAAAGACAAGACTGTTTGAAGGTAAGTGATC	23.7462517985772,25.1634016332696,24.5534699353896	25.7851115033122,27.3239382122345,26.6616376111694	24.7486567728441,26.2256290189059,25.589950160038	21.4429297602304,22.7226199034492,22.1718499264812	NA	NA	-0.8	0.474962	NA	NA	-14.9	0.0185653	NA	NA	-10.2	0.188186	24.4877	26.5902	25.5214	22.1125
DTNB	both	ENSG00000138101	80	4636	chr2	-	25642383	25642404	25650403	25650500	25611070	25611230	-14.5	-5.1	21	97	160	7999	31153	GCAGTAAGT	9.07	TTTCATCTTCAACACTCCAGGAG	5.8	AAGGTAAGA	10.57	TTCTGTCTTTGAATCTCCAGGCT	8	upstream	CCAGGAGGAAGAGCAAAAGCAGGCAGTAAGTGAAC	9.51191331414234,10.591009761718,9.6932944162306,9.61144512682938,9.97232541945126,10.3613628220306,9.82476943297356,10.4565459450677	7.63103081518394,8.54212390381638,7.83073730631597,7.76461527839774,8.05615277320616,8.37043701663423,7.93694952625367,8.44733079500226	8.45410042466921,9.43334408559816,8.78708733506206,8.71288997517613,9.04003227712267,9.39269933604813,8.90627101038349,9.47898397561813	9.07806527352856,10.1333113341623,9.15768905138979,9.08036236458674,9.42130212796296,9.78884317326711,9.28189938377609,9.87876692945198	-17.3867	7.57e-05	-13	0.663444	-14.5	0.00316168	-14.9	1	-5.1	0.632151	-2.6	0.692308	10.0028	8.07242	9.02568	9.47753
ZBTB1	MATS_only	ENSG00000126804	NA	44113	chr14	+	64983317	64983469	64977966	64978102	64988204	64988324	-14.9	52.3	152	136	120	5215	4735	aaggtagtc	5.64	acttgttctttctactacagcat	8.71	TGGGTAAGT	10.24	AATATTTTTGTTTTACATAGGTC	8.96	none	ttatacagtgcctggtataccaaaggtagtcagta	19.8702041697604,20.2102344357685	18.0131977025096,18.0626555829883	19.6355195010927,19.4302882132543	18.0490826265526,17.5728959206877	NA	NA	-34.3	0.0920593	NA	NA	-14.9	0.879414	NA	NA	52.3	0.0480818	20.0402	18.0379	19.5329	17.811
RHOC	MATS_only	ENSG00000155366	NA	65602	chr1	-	113247721	113247745	113249699	113249747	113246265	113246428	-14.8	-10.8	24	48	163	1954	1293	GAGGTCAGT	7.7	CCCGCCCTCTCTTCCTGCAGCCT	12.16	AAGGTACCC	9.16	CAATACGTCTTTCCTGGCAGCCC	7.44	none	GCCTGGGAACTTCAGCCGGCTGGAGGTCAGTTCCC	43.6571255070994,44.5964914878813,41.5008322644438	32.6173693770023,33.2049297774184,31.0063468379807	52.0629988319906,53.1733822310531,49.4915264487356	83.9419963426515,85.7927543426787,79.7959707537875	NA	NA	3.3	0.580807	NA	NA	-14.8	0.0443882	NA	NA	-10.8	0.000645655	43.2515	32.2762	51.576	83.1769
SVOPL	MATS_only	ENSG00000157703	NA	42813	chr7	-	138305790	138305880	138310713	138310795	138281161	138281275	-14.7	-48.8	90	82	114	4833	24515	CAGGTACAG	8.68	TTCCGTGCCTCTCCCTGCAGGTC	13.53	GAGGTGAGT	10.03	AATTCTCTTGTGACTTGCAGGTT	8.76	none	AATGGTGGCACCATTTATATCCCAGGTACAGCCAA	0.0493944083837655,0.0627076092359697	0.0767518125909022,0.097438613591828	1.48834248909553,1.87694435771384	0.757059016809174,0.961107998820373	NA	NA	NA	NA	NA	NA	-14.7	1	NA	NA	-48.8	0.0209652	0.056051	0.0870952	1.68264	0.859084
LENG8	MATS_only	ENSG00000167615	NA	25110	chr19	+	54962466	54962559	54960064	54960488	54963269	54963344	-14.7	-20.2	93	424	75	1978	710	TTGGTTAGT	4.82	ACTCATTCTTTTTCTCATAGGCA	8.76	TTGGTAAGG	8.92	GATGTCCTCTCTCTCTGCAGGTC	14.2	none	TGGGTGATCAACGTAGCACAGATTGGTTAGTGAGG	92.5663	119.38	126.742	143.949	NA	NA	0.7	0.747054	NA	NA	-14.7	0.0126607	NA	NA	-20.2	5.31e-05	92.5663	119.38	126.742	143.949
LENG8	MATS_only	ENSG00000167615	NA	28166	chr19	+	54962466	54962559	54960064	54960488	54963269	54963444	-14.7	-20.2	93	424	175	1978	710	TTGGTTAGT	4.82	ACTCATTCTTTTTCTCATAGGCA	8.76	TTGGTAAGG	8.92	GATGTCCTCTCTCTCTGCAGGTC	14.2	none	TGGGTGATCAACGTAGCACAGATTGGTTAGTGAGG	92.5663	119.38	126.742	143.949	NA	NA	0.7	0.747054	NA	NA	-14.7	0.0126607	NA	NA	-20.2	5.31e-05	92.5663	119.38	126.742	143.949
FKBP1A	MATS_only	ENSG00000088832	NA	48851	chr20	-	1373477	1373525	1373605	1373806	1356134	1356247	-14.7	-12.1	48	201	113	80	17230	CCGGTGAGT	10.9	GCCCGTCTCTGTCTCCTCAGGGC	11.69	ACGGTGAGT	11.45	TACAGTCGTCTTTTTCACAGGGA	6.81	none	CAGACCTGCGTGGTGCACTACACCGGTGAGTCGGG	60.3341387210623,53.5318942722987	80.8907525467489,70.5879514844627	97.8952133605422,71.43515327772	142.215617822918,94.0639293256379	NA	NA	1.2	0.683065	NA	NA	-14.7	0.0268824	NA	NA	-12.1	0.0335522	56.933	75.7394	84.6652	118.14
FKBP1A	MATS_only	ENSG00000088832	NA	54973	chr20	-	1373477	1373525	1373605	1373672	1356134	1356247	-14.7	-12.1	48	67	113	80	17230	CCGGTGAGT	10.9	GCCCGTCTCTGTCTCCTCAGGGC	11.69	ACGGTGAGT	11.45	TACAGTCGTCTTTTTCACAGGGA	6.81	none	CAGACCTGCGTGGTGCACTACACCGGTGAGTCGGG	60.3341387210623,53.5318942722987	80.8907525467489,70.5879514844627	97.8952133605422,71.43515327772	142.215617822918,94.0639293256379	NA	NA	1.2	0.683065	NA	NA	-14.7	0.0268824	NA	NA	-12.1	0.0335522	56.933	75.7394	84.6652	118.14
C16orf13	MATS_only	ENSG00000130731	NA	13138	chr16	-	684888	684956	686093	686347	684718	684797	-14.6	-14.7	68	254	79	1137	91	CAGGTCAGA	7.41	CTGTGTCCCCATGCCCACAGCCC	9.12	CAGGTGCGG	9.13	CATCTCCCCACCCTCTGCAGGAA	10.03	none	ACTTTGACCTGATGCTCAGATGCAGGTCAGAGCTA	57.5153133270003,62.5814290086531,67.8551449363486,79.3314666579314,88.0015723036069	55.6416764519829,60.5427567612249,65.6446744658225,76.7471399337695,85.1348055003017	47.8190067875959,52.0310436548971,56.4156821651412,65.9572507415115,73.1656934455019	86.6391272354902,94.2705529505334,102.214700671084,119.502244462745,132.562599048838	NA	NA	5.2	0.40101	NA	NA	-14.6	0.00387746	NA	NA	-14.7	0.00688382	71.057	68.7422	59.0777	107.038
RUFY2	MATS_only	ENSG00000204130	NA	4896	chr10	-	70156536	70156638	70161376	70161494	70154084	70154208	-14.6	-1.1	102	118	124	4738	2328	GAGGTTAGT	7.15	CAATTGGTTCTTCTCTTTAGGAC	9.31	GAAGTAAGG	6.38	TATTTTTTAAATTTTCACAGTGA	6.87	none	TAATTATTCAGAGGGATCTCTTGAGGTTAGTACTA	2.71568231891258,1.91677240634156	2.14050776524001,1.41338046568079	2.42069830956429,1.85128310885779	1.95005437693365,1.64912301830206	NA	NA	-32.2	0.0870864	NA	NA	-14.6	0.0202679	NA	NA	-1.1	0.879912	2.31623	1.77694	2.13599	1.79959
SLC22A17	MATS_only	ENSG00000092096	NA	72706	chr14	-	23817099	23817205	23817369	23817515	23816722	23816940	-14.5	-4.5	106	146	218	164	159	CAAGTGAGC	6.39	CTCCTCTCTCTCTCCCAAAGACC	8.65	AGGGTAAGA	9.21	TTCCCCACCCCTTCTCACAGCTT	7.83	none	ATCTGCTTATCCTGGGCTTCACCAAGTGAGCCTGG	2.22532563950208,2.19109724686375	2.49864974021262,2.39644455945054	2.73892338984066,2.75189670749674	2.87756709078107,2.80200210632213	NA	NA	-1.8	0.574587	NA	NA	-14.5	0.00909692	NA	NA	-4.5	0.63186	2.20821	2.44755	2.74541	2.83978
DDX60L	MATS_only	ENSG00000181381	NA	24097	chr4	-	169298878	169298994	169299504	169299626	169296527	169296675	-14.5	90.8	116	122	148	510	2203	AAGGTAATT	8.83	AATTTCTTATTTTTTTAAAGACA	5.31	AAGGTAAAG	9.06	GAAATGTATTTCGCCCATAGGTG	8.69	none	ACCCTAGTGAATAGAGAACAAAAAGGTAATTAGCA	1.31321	1.28711	1.62712	1.47842	NA	NA	-38.3	1	NA	NA	-14.5	1	NA	NA	90.8	0.00455426	1.31321	1.28711	1.62712	1.47842
FDPS	MATS_only	ENSG00000160752	NA	42166	chr1	+	155289647	155289719	155289401	155289479	155290199	155290456	-14.3	-7.6	72	78	257	168	480	AAGGTGCCT	5.39	AAATTGGCACTGACATCCAGGAC	2.07	CAGGTAAGA	10.77	TGTCTTTCAACCTCTTCCAGGAA	10.45	none	TCCAGAACAGTACCAGATCCTGAAGGTGCCTGAGA	859.970059866459,891.751781734649,987.23020325477,1104.44315380843,971.974990400943	256.715959499444,266.166618493921,294.705316734788,329.695412868852,290.151371443081	641.563900370758,665.230167492072,736.503849752978,823.948286763783,725.122995562534	274.407117750883,284.535533085685,315.014449077247,352.415830154981,310.146676133449	NA	NA	-1.5	0.786071	NA	NA	-14.3	0.0269144	NA	NA	-7.6	0.15132	963.074	287.487	718.474	307.304
MTCP1,MTCP1NB	MATS_only	ENSG00000214827	NA	25256	chrX	-	154294180	154294332	154298968	154299501	154293893	154294064	-14.2	-19.3	152	533	171	4636	116	GAGGTAACT	8.77	CCTGTGCGCGGGTGCTGCAGGCT	5.2	CATGTGAGT	7.83	TGATCATTCCTTTCCATTAGGAG	8.3	none	CACGTGGGTGGCCGTCGTGGAAGAGGTAACTGTTT	4.09756	3.55922	3.60969	3.04323	NA	NA	39.1	0.492108	NA	NA	-14.2	0.0755463	NA	NA	-19.3	0.0139413	4.09756	3.55922	3.60969	3.04323
HOTAIRM1	MATS_only	ENSG00000233429	NA	59361	chr7	+	27138692	27138985	27135851	27136007	27139397	27139585	-14.2	-16.3	293	156	188	2685	412	ACGGTAAGT	11.81	GATGACATTCTCATTCATAGAAA	5.95	GAGGTGAGA	7.66	TGTTTTTCTCTATCTTTTAGGTC	13.64	none	TGCTTACATGCTGCGTTTTCTCACGGTAAGTAAGT	13.5330406877696,10.0460790546182	11.1927473598718,8.30879234090102	20.8437936929632,15.4731227126882	19.7869064479667,14.688556031776	NA	NA	-8.5	0.605328	NA	NA	-14.2	0.249778	NA	NA	-16.3	0.0183313	11.7896	9.75077	18.1585	17.2377
C1orf52	MATS_only	ENSG00000162642	NA	35481	chr1	-	85724617	85724744	85725040	85725316	85724206	85724405	-14.1	-18.7	127	276	199	296	212	TTGGTAACT	4.27	CCCCGCCCCCCCCGCTGCAGCTT	8.09	GAGGTGAGG	8.41	TTAATGTGCTTGCTTAACAGCCT	7.68	none	ATCTCTGAGACTGGATTCTTCTTTGGTAACTAAAA	10.2921449492232,9.90656901749716	5.77420254964817,5.55788286710973	10.5206857406169,10.1265479562339	5.91442039759064,5.69284771602898	NA	NA	-2	0.309439	NA	NA	-14.1	0.0209661	NA	NA	-18.7	0.0141354	10.0994	5.66604	10.3236	5.80363
C1orf52	MATS_only	ENSG00000162642	NA	31640	chr1	-	85724617	85724744	85725040	85725355	85724206	85724405	-14.1	-18.7	127	315	199	296	212	TTGGTAACT	4.27	CCCCGCCCCCCCCGCTGCAGCTT	8.09	GAGGTGAGG	8.41	TTAATGTGCTTGCTTAACAGCCT	7.68	none	ATCTCTGAGACTGGATTCTTCTTTGGTAACTAAAA	10.2921449492232,9.90656901749716	5.77420254964817,5.55788286710973	10.5206857406169,10.1265479562339	5.91442039759064,5.69284771602898	NA	NA	-2	0.309439	NA	NA	-14.1	0.0209661	NA	NA	-18.7	0.0141354	10.0994	5.66604	10.3236	5.80363
GTPBP5	MATS_only	ENSG00000101181	NA	17223	chr20	+	60768471	60768680	60758097	60758113	60770857	60771005	-14.1	27.1	209	16	148	10358	2177	CTGGTGAGA	7.54	TGCCAATTTGACTTCTGTAGGGG	6.64	CCGGTGAGT	10.9	GATATTTGTGTTCTCTGTAGAAA	8.45	none	GAAGCTGCTCTCTGAGAAAAAGCTGGTGAGACTCC	5.90467	6.87837	5.62033	6.93878	NA	NA	-27.1	0.00439708	NA	NA	-14.1	0.0996319	NA	NA	27.1	0.0352614	5.90467	6.87837	5.62033	6.93878
NARG2	MATS_only	ENSG00000128915	NA	34464	chr15	-	60748855	60748993	60760259	60760521	60747524	60747641	-14.1	NA	138	262	117	11266	1214	TTGGTAAGG	8.92	TCTTAATTTCTGTTTCTCAGAAA	8.32	TTGGTATGT	7.12	GATTTTTTTTTCATATTTAGGGC	10.3	none	GTTAGAAAAAACTCTTCTCGCATTGGTAAGGTTTA	5.11308015654068,5.22913815413559	4.44387148079497,4.54473960917165	4.10457130868116,4.19773791520535	2.89272713582379,2.95838699420538	NA	NA	NA	NA	NA	NA	-14.1	0.0390963	NA	NA	NA	NA	5.17111	4.49431	4.15115	2.92556
WASF1	MATS_only	ENSG00000112290	NA	62785	chr6	-	110481837	110481935	110499800	110499945	110448671	110448832	-14	-59.4	98	145	161	17865	33005	AAGGTAAAA	8.38	TTGTTCTCAATTTTAAACAGTGT	7.13	TAGGTACTT	5.6	TTATTTTTGATTTCCTACAGGTG	12.28	none	CTGCAAAATCGTTAAAATCTTCAAGGTAAAATTAA	7.23965676689985,7.58103895590814,7.4669105667577,7.83059952617317	10.0878772411858,10.5635657615019,10.4045370649001,10.9113082689346	7.97700886082034,8.35316049815983,8.2274082421017,8.62813857300688	9.93813068054638,10.4067579809299,10.250089939577,10.7493385258177	NA	NA	7	0.260949	NA	NA	-14	0.0273183	NA	NA	-59.4	0.00790919	7.52955	10.4918	8.29643	10.3361
ILF3	MATS_only	ENSG00000129351	NA	12665	chr19	+	10798021	10798384	10794592	10794646	10799225	10799354	-14	-24.9	363	54	129	3375	841	TCAGTGAGT	7.68	CCCACTGCCTCCCTGTTTAGGTC	12.12	ACAGTAAGT	9.49	TCCTGTCTTCTCTCCCCCAGACT	11.2	none	GACTACAACTACGAGAGCAAATTCAGTGAGTTGGC	58.3297508482145,58.4443288495533,61.5262164251385,61.3288061050578,69.823359157661	61.3962712704946,61.5168728837285,70.0261875632341,69.8015046084858,79.4695973320355	55.1212102708959,55.2294856880265,54.9276149291596,54.7513765924885,62.3349005954054	52.286404100979,52.3891110659834,55.1080622073947,54.9312448954993,62.5396821641301	NA	NA	5.2	0.653226	NA	NA	-14	0.0131514	NA	NA	-24.9	0.00105916	61.8905	68.4421	56.4729	55.4509
ARV1	MATS_only	ENSG00000173409	NA	71970	chr1	+	231125855	231126009	231114839	231115025	231131505	231131730	-13.9	-3.5	154	186	225	10830	5496	TAGGTAAGG	9.31	GCAATGTCTTTGACTATCAGATC	5.82	TGTGTGAGT	5.84	ATTTTCCATTTCTTCTTTAGAAC	9.88	none	AGAATGTTTGCGATTGCTGCTTTAGGTAAGGAGAT	5.09044	7.42172	6.81068	8.3103	NA	NA	NA	NA	NA	NA	-13.9	0.0447952	NA	NA	-3.5	1	5.09044	7.42172	6.81068	8.3103
NFXL1	MATS_only	ENSG00000170448	NA	35408	chr4	-	47864862	47864932	47877143	47877310	47857075	47857180	-13.9	-1.8	70	167	105	12211	7682	GAGGTAAGC	9.85	ATCAACTTTCTTATTTTTAGAAA	8.13	TAGGTAAGT	9.66	TTATTTTGATTTTATTTTAGCTT	8.04	none	TTGCAAAAATCAGTGCCCTAAAGAGGTAAGCTTTA	5.92015	4.1929	4.26476	2.75699	NA	NA	-3	0.261443	NA	NA	-13.9	0.0331488	NA	NA	-1.8	0.538184	5.92015	4.1929	4.26476	2.75699
C16orf13	MATS_only	ENSG00000130731	NA	13133	chr16	-	685280	685340	686093	686347	684718	684797	-13.8	-14.5	60	254	79	753	483	GGGGTGAGT	7.93	GTCCTGTTCCTACTCACCAGGGG	7.47	CAGGTGCGG	9.13	CATCTCCCCACCCTCTGCAGGAA	10.03	none	CAGGGCCCTGCTCATCACCTACGGGGTGAGTGGGC	57.5153133270003,62.5814290086531,67.8551449363486,79.3314666579314,88.0015723036069	55.6416764519829,60.5427567612249,65.6446744658225,76.7471399337695,85.1348055003017	47.8190067875959,52.0310436548971,56.4156821651412,65.9572507415115,73.1656934455019	86.6391272354902,94.2705529505334,102.214700671084,119.502244462745,132.562599048838	NA	NA	4.8	0.687939	NA	NA	-13.8	0.0263895	NA	NA	-14.5	0.022594	71.057	68.7422	59.0777	107.038
ABCD4	MATS_only	ENSG00000119688	NA	61579	chr14	-	74764632	74764772	74766250	74766378	74763035	74763152	-13.8	14.6	140	128	117	1478	1480	CCCGTAGGC	0.7	TTGCTTCCCCCACTGCACAGCTG	7.31	ACGGTAAGA	10.65	CTCTGTGTCATTGGCTCCAGGGA	7.73	none	TGCTGCGGGATGACATCGATAACCCGTAGGCGCCC	12.2065515431712,12.7223780857681	11.6939942959845,12.1881611067755	13.5733103945874,14.1468936664617	14.6103615626606,15.2277687201451	NA	NA	-7.7	0.633672	NA	NA	-13.8	0.460438	NA	NA	14.6	0.0456374	12.4645	11.9411	13.8601	14.9191
GTSE1	MATS_only	ENSG00000075218	NA	56009	chr22	+	46711928	46712309	46709786	46709910	46719086	46719159	-13.6	-7.8	381	124	73	2018	6777	TTGGTGAGT	9.27	TTTGTGTGTATACCTTCTAGCTA	6.48	AAGGTGAGG	9.16	ACTTCCTTTCTTGGACTTAGGTG	9.45	none	TTTAAAATTCCTAAGTTTTCTATTGGTGAGTAATA	35.179	33.8037	19.5355	20.586	NA	NA	0.7	0.590761	NA	NA	-13.6	0.0252383	NA	NA	-7.8	0.294902	35.179	33.8037	19.5355	20.586
CCDC92	MATS_only	ENSG00000119242	NA	13856	chr12	-	124428818	124428911	124457075	124457371	124427893	124428040	-13.5	-8.9	93	296	147	28164	778	AAGGTAGAG	6.38	AACTCACATTTCATCCTCAGTAT	5.4	CAGGTGAGG	10.07	AGGGTCTGTGTTACCCACAGGTC	9.82	none	CCACATTTCTCGAGTTACGATGAAGGTAGAGTCTG	7.98138	8.10905	12.357	11.4015	NA	NA	-16.8	0.269831	NA	NA	-13.5	0.0470496	NA	NA	-8.9	0.494769	7.98138	8.10905	12.357	11.4015
LENG8	MATS_only	ENSG00000167615	NA	25108	chr19	+	54962466	54962559	54960395	54960484	54963269	54963344	-13.4	-18.3	93	89	75	1982	710	TTGGTTAGT	4.82	ACTCATTCTTTTTCTCATAGGCA	8.76	CTGGTTGGT	4.67	GATGTCCTCTCTCTCTGCAGGTC	14.2	none	TGGGTGATCAACGTAGCACAGATTGGTTAGTGAGG	92.5663	119.38	126.742	143.949	NA	NA	-0.4	0.931848	NA	NA	-13.4	0.00293436	NA	NA	-18.3	4.49e-05	92.5663	119.38	126.742	143.949
LENG8	MATS_only	ENSG00000167615	NA	28165	chr19	+	54962466	54962559	54960401	54960484	54963269	54963444	-13.4	-18.3	93	83	175	1982	710	TTGGTTAGT	4.82	ACTCATTCTTTTTCTCATAGGCA	8.76	CTGGTTGGT	4.67	GATGTCCTCTCTCTCTGCAGGTC	14.2	none	TGGGTGATCAACGTAGCACAGATTGGTTAGTGAGG	92.5663	119.38	126.742	143.949	NA	NA	-0.4	0.931848	NA	NA	-13.4	0.00293436	NA	NA	-18.3	4.49e-05	92.5663	119.38	126.742	143.949
ZDHHC20	MATS_only	ENSG00000180776	NA	6694	chr13	-	21956039	21956084	21957058	21957148	21955572	21955688	-13.4	-15.8	45	90	116	974	351	CAGGTAATT	8.55	GAATCATTTTTTCCCCTTAGATC	9.58	AAGGTATGC	9.55	TTGTTTGCTCTTCTTTTCAGTAG	8.44	none	AAGCAGAAAACTTGGCAAATGACAGGTAATTGTTT	20.9036	17.0791	17.6002	13.2942	NA	NA	0.6	0.85292	NA	NA	-13.4	0.0899969	NA	NA	-15.8	0.0363626	20.9036	17.0791	17.6002	13.2942
EML6	MATS_only	ENSG00000214595	NA	28799	chr2	+	55106683	55106777	55098636	55098742	55118190	55118291	-13.3	-19	94	106	101	7941	11413	AAGGTAAGA	10.57	TTTGTGTTGTTTTCATACAGCCG	8.51	CAGGTAAGG	11.08	TTCCTATTTGTCTCTTACAGAGG	10.56	none	AGGGAGAAAAGATAGCCACAACAAGGTAAGAAGCT	3.77882	3.16974	2.91686	2.30373	NA	NA	-14.3	1	NA	NA	-13.3	0.0428463	NA	NA	-19	1	3.77882	3.16974	2.91686	2.30373
CAPNS1	MATS_only	ENSG00000126247	NA	48271	chr19	+	36631898	36632122	36630917	36631059	36633201	36633235	-13.3	-16	224	142	34	839	1079	CAGGTAAGG	11.08	GTCCCCTTTTTTCCCCCCAGCAG	9.64	GCGGTAAGC	8.99	TCCCCCTTATCTCTTCGCAGCGA	10.13	none	TAGGCGGAGTCATCAGCGCCATCAGGTAAGGCGGA	64.1652032299075,64.0349626279523	64.4427507876877,64.3119468280375	72.4305520903222,72.2835347315462	117.82262612859,117.583473301536	NA	NA	NA	NA	NA	NA	-13.3	0.0207839	NA	NA	-16	0.0243127	64.1001	64.3773	72.357	117.703
C2orf43	MATS_only	ENSG00000118961	NA	27845	chr2	-	21001051	21001225	21022796	21022849	20990014	20990158	-13.3	-3.7	174	53	144	21571	10893	TGGGTGAGG	6.74	ACTTTTCTCCCCTTATTTAGAAA	9.04	CAGGTGAGG	10.07	GTCTGTGTTTCTTTTCTTAGGTA	11.45	none	ATTCCTGGTGAGCGTAAAAGTCTGGGTGAGGAGAC	7.02334	6.4764	6.28492	5.25185	NA	NA	-6.9	0.15388	NA	NA	-13.3	0.0287166	NA	NA	-3.7	0.620568	7.02334	6.4764	6.28492	5.25185
ETS2	MATS_only	ENSG00000157557	NA	5070	chr21	+	40178374	40178732	40177874	40178044	40181958	40182030	-13.3	2.6	358	170	72	330	3226	GAGGTAACT	8.77	CTCGCTTTTGTTTTTAAAAGGAA	8.46	AGGGTAAGA	9.21	TTTTTTTTTTCTTTTTTAAGATG	10.17	none	GTTCCTACAGCATTTGAATGAAGAGGTAACTGAGT	15.0917258229155,15.6756185252296	18.8577076627257,19.6519244411057	11.7393962399777,12.2153778606406	11.2703949961934,11.7581843839684	NA	NA	-6.6	0.616542	NA	NA	-13.3	0.0348821	NA	NA	2.6	0.570203	15.3837	19.2548	11.9774	11.5143
SPTAN1	MATS_only	ENSG00000197694	NA	37554	chr9	+	131371929	131371944	131371400	131371563	131373992	131374124	-13.2	-55.1	15	163	132	366	2048	CTGGTAAGT	10.65	CTTTTAATCTGTTTTTGTAGCTT	8.44	CAGGTAAGC	9.88	AATTTTTTTGGTATTTTTAGAGC	6.9	none	GTTTTTGTAGCTTTCCAAGCTGCTGGTAAGTTTTT	30.7567177291998,31.0512470741551,30.8151757583354	24.7662375562624,25.0034014756597,24.8133097259715	37.8584327317948,38.2209687960037,37.9303886987204	32.8037989915852,33.1179313874443,32.8661478239311	NA	NA	22.8	0.00146921	NA	NA	-13.2	0.252399	NA	NA	-55.1	1.37e-05	30.8744	24.861	38.0033	32.9293
TRNAU1AP	MATS_only	ENSG00000180098	NA	54809	chr1	+	28887624	28887772	28887144	28887244	28887857	28887910	-13.2	-22.5	148	100	53	380	85	aaggtAATT	8.83	GCATTCTGCTCTTCCCACAGTTA	9.59	CCTGTAAGG	4.84	GTTTGTTTTTCAACTTCCAGGCG	8.95	none	gagagggggagatgttttggccaaggtAATTTATT	12.4649915256628,11.5494487237779	11.1838644198125,10.3624192912109	10.4805174606181,9.71073255532204	12.4364820052655,11.5230332028936	NA	NA	7.6	0.801218	NA	NA	-13.2	0.0317253	NA	NA	-22.5	0.0965833	12.0072	10.7731	10.0956	11.9798
FDFT1	MATS_only	ENSG00000079459	NA	70176	chr8	+	11660599	11660734	11660276	11660440	11660830	11661341	-13.1	-5.9	135	164	511	159	96	CCGGTATTT	4.59	CTCGAGCCTTCCCCCTGTAGGGC	7.81	CAGGTGGGC	8.07	AAGCGGAATGAACTATGCAGATA	-0.57	none	CCTCCGTGAGCATCGGCGCTTACCGGTATTTTAAC	346.504	176.343	235.287	157.403	NA	NA	0.4	0.767861	NA	NA	-13.1	0.00183643	NA	NA	-5.9	0.152879	346.504	176.343	235.287	157.403
EFHD2	MATS_only	ENSG00000142634	NA	1579	chr1	+	15753645	15753780	15752366	15752514	15755088	15756839	-13.1	-3.7	135	148	1751	1131	1308	AAGGTGAGG	9.16	CGCCTCCCTCCCCGCTGCAGTTC	8	GAGGTAAGC	9.85	TCACCCCCATGCCCCCGCAGGTC	11	none	GGCCAAGAGCTTCTTTGAGGCCAAGGTGAGGAGCC	11.8715	17.7246	24.3192	26.5606	NA	NA	2.8	0.388463	NA	NA	-13.1	0.0393915	NA	NA	-3.7	0.555363	11.8715	17.7246	24.3192	26.5606
TIA1	MATS_only	ENSG00000116001	NA	41626	chr2	-	70452459	70452525	70454866	70454954	70451685	70451761	-12.9	-20.3	66	88	76	2341	698	AATGTTGGC	-8.78	GGGCTCTGGTTATTTTGCAGAGT	6.69	ATCGTAAGT	10.44	CTGATTGTTTCTGATTTCAGAGA	7.49	none	AAGCTACGGTTCACAGTGGATAAATGTTGGCGTGC	21.301520584083,21.1504459700115	17.2372835867773,17.1150333485732	19.58308521672,19.4441980875234	15.2514649295187,15.1432985115789	NA	NA	9.9	0.226082	NA	NA	-12.9	0.237286	NA	NA	-20.3	0.0410025	21.226	17.1762	19.5136	15.1974
FNBP1	both	ENSG00000187239	2403	6073	chr9	-	132686122	132686305	132687238	132687436	132671168	132671278	-6.4	9.5	183	198	110	933	14844	GGGGTAAGT	9.65	GCTCCATCTCTTACATGTAGCTT	5.85	AAGGTACTG	8.56	ATTTATATTTGTGTCTGCAGGGT	9.41	within	CTGCTTCAGGAGCCTAAAGCGTGGGGTAAGTTCTG	94.0693	66.3109	67.5309	56.1762	-5.84	0.0444152	-8.8	0.0392883	-6.4	0.284898	-12.9	0.000353126	9.5	0.655265	-11.3	0.000101078	94.0693	66.3109	67.5309	56.1762
PPP1R35	MATS_only	ENSG00000160813	NA	45496	chr7	-	100033253	100033390	100033470	100034046	100032904	100033156	-12.7	-7.8	137	576	252	80	97	AAGGTGATG	5.22	CGTCCCCGCTGCGCTCTCAGGGC	9.34	AGGGTGAgg	7.13	TGGGCCCAACCTCCCAACAGGAG	7.88	none	ACAGGCTCGAGCCCCGCACCCAAAGGTGATGGGGT	40.8169	42.3821	45.8125	57.7723	NA	NA	7	0.172564	NA	NA	-12.7	0.0164912	NA	NA	-7.8	0.100209	40.8169	42.3821	45.8125	57.7723
APOPT1	MATS_only	ENSG00000256500	NA	38185	chr14	+	104040443	104040507	104029298	104029461	104053610	104053701	-12.6	-5.7	64	163	91	10982	13103	CAGGTTAGT	8.02	tttttttttttttttttAAGGAA	11.34	GGGGTAAGC	7.79	AAGCTGAAATTACCTTTCAGGTC	5.97	none	GGCCTGGGCCTGAGAACTGAATCAGGTTAGTGTGT	11.0018	9.00155	9.28592	10.8416	NA	NA	-3.5	0.268645	NA	NA	-12.6	0.0415986	NA	NA	-5.7	0.83825	11.0018	9.00155	9.28592	10.8416
C3orf67	MATS_only	ENSG00000163689	NA	40630	chr3	-	58899433	58899590	58923373	58923488	58870270	58870435	-12.5	-8.1	157	115	165	23783	28998	ATGGTATGT	8.35	TTTGCATCTCTCTATTTTAGTGG	9.44	ATTGTAAGT	8.54	ATGTTTGTCTTTATTTCCAGCTG	10.16	none	CCACAAGACACTGCTGATAAGGATGGTATGTTCAG	5.03211	4.66088	2.60382	3.20744	NA	NA	-12	0.023732	NA	NA	-12.5	0.0147753	NA	NA	-8.1	0.799918	5.03211	4.66088	2.60382	3.20744
PEX2	MATS_only	ENSG00000164751	NA	56670	chr8	-	77898422	77898532	77912225	77912503	77896405	77896431	-12.4	-42.1	110	278	26	13693	1991	AAGGTGAGA	8.68	TTATTCTTTTTTGTATGTAGCTT	7.97	AAGGTCAGT	8.68	TCAATTGTATTTTTTCCTAGAGA	7.31	none	AGGGAGCTGCAGGAACAGGAAAAAGGTGAGATCTC	4.92893660026267,4.11303059416965,4.08297419339015,4.76932223373193	4.68306109803916,3.79473015488769,3.76699976782297,4.53140894845613	4.49074860289017,3.83445377347051,3.80643310191284,4.34532413273956	4.34164803261238,3.8107028033818,3.78285569451945,4.2010519047604	NA	NA	16.1	0.372223	NA	NA	-12.4	0.35475	NA	NA	-42.1	0.00492401	4.47357	4.19405	4.11924	4.03406
ERBB2IP	both	ENSG00000112851	652	3910	chr5	+	65364704	65364848	65349233	65350779	65370851	65371058	-16.8	-3.6	144	1546	207	13925	6003	CGAGTGAGT	8.49	TCTATCCCCTCTTTATTCAGAGC	9.29	AAGGTAATT	8.83	ATACTTCATGTTTTTCTTAGATG	7.36	none	AGGTTCTGGTGGGCACATTTTTCGAGTGAGTACCT	12.3533417880863,11.9837592255579,12.0045794240097,11.7394350958,12.1150832965569,11.7744433515529	9.59159657856902,9.30463885465462,9.32080443540688,9.11493646260163,9.40660377489119,9.14211818167499	10.4458131524002,10.13329930321,10.1509045720153,9.92670223402377,10.2443451021201,9.95630472577534	7.08771927673997,6.87567159784343,6.88761716888355,6.73549083753061,6.95101867116871,6.75557679430257	-17.5	1.2e-10	-6.5	0.112111	-16.8	0.00738004	-12.4	0.023415	-3.6	0.148287	-5.5	0.300169	11.9951	9.31345	10.1429	6.88218
PSD4	MATS_only	ENSG00000125637	NA	41353	chr2	+	113956316	113956461	113955326	113955490	113956659	113956803	-12.4	-5.1	145	164	144	826	198	CTGGTACGG	8.6	AACGACCTCCTTTGCCCCAGCAC	5.11	ACCGTAAGT	10.43	TCACCGCCCGCTGCTCGCAGGAG	8.09	none	CGTGGGCCCCGCCCAGAGCTCCCTGGTACGGCCTC	19.49	27.2672	37.505	47.6439	NA	NA	13.1	0.0441296	NA	NA	-12.4	0.0254218	NA	NA	-5.1	0.276829	19.49	27.2672	37.505	47.6439
MFSD8	MATS_only	ENSG00000164073	NA	27172	chr4	-	128886226	128886363	128887051	128887104	128878655	128878747	-12.4	1.2	137	53	92	688	7479	CAGGTGAGC	9.6	TTACAGGCTTGTTTTGCCAGCTT	2.92	CAGGTAAGG	11.08	TTTTTCTTCTTTACACCTAGAGA	7.72	none	TCTTAGGCGACACACCTGGAAGCAGGTGAGCGGAT	4.37911	3.34248	3.88663	2.69688	NA	NA	-5.9	0.294095	NA	NA	-12.4	0.0402625	NA	NA	1.2	0.755864	4.37911	3.34248	3.88663	2.69688
TBC1D5	MATS_only	ENSG00000131374	NA	26950	chr3	-	17665340	17665405	17783972	17784056	17560393	17560487	-12.4	7.6	65	84	94	118567	104853	TCTGTAAGA	4.08	TTTTTTTTTCTTTATTTCAGTGA	10.68	CAGGTAAAA	8.59	ctgctctcaactccttgcaggag	8.92	none	ATTCTCAAAGCCTGAAAGAAAATCTGTAAGAATAA	8.58311060382199,10.3651307403831,9.43199463791712	7.79645226831202,9.39198599654679,8.62897163587233	5.59934501637194,6.76863196077134,6.2975899267002	4.91225477203346,5.92788002499682,5.63261949605269	NA	NA	-7.6	1	NA	NA	-12.4	0.0473154	NA	NA	7.6	1	9.46008	8.6058	6.22186	5.49092
PPP3CC	MATS_only	ENSG00000120910	NA	24009	chr8	+	22396981	22397011	22390433	22390531	22398127	22398569	-12.4	12.5	30	98	442	6450	1116	AAGGTATGG	9.26	CTGCTCCTGCCCTCTTACAGCCA	10.23	CAGGTGAGT	10.67	TGCTTCCTGTTTTTCTGTAGCCA	8.8	none	GTAGAAGCGGTAGAGGCCCGGGAAGGTATGGCCAT	6.37531667472489,6.45879965169641,6.30200596338861	5.22219734228957,5.29058054624797,5.16214652106222	7.19085653864796,7.28501878053336,7.10816781354426	5.8543490861753,5.93101013924613,5.78702905835302	NA	NA	-17.9	0.252753	NA	NA	-12.4	0.0259155	NA	NA	12.5	0.462085	6.37871	5.22497	7.19468	5.85746
MYO6	both	ENSG00000196586	1984	32903	chr6	+	76621388	76621415	76618212	76618344	76623779	76623998	-21.6	-1.7	27	132	219	3044	2364	CACGTAAGT	10.16	CATAAAATATTTGTTCACAGATT	7.27	ATGGTAAAG	5.39	TTCCTTGTTCTGTGTAATAGCTC	7.57	none	TTTGCACCATTTTTGAACAATTCACGTAAGTCAAT	2.28551	1.87496	2.14587	1.90952	-29.6133	4.03e-14	-17.7	1	-21.6	0.0175695	-12.4	0.0667839	-1.7	0.835574	NA	NA	2.28551	1.87496	2.14587	1.90952
WDR4	MATS_only	ENSG00000160193	NA	29111	chr21	-	44293660	44293801	44296811	44296877	44283549	44283706	-12.3	NA	141	66	157	3010	9954	CAGGTATGA	9.46	CTTCCTCCTCTCTTCCTCAGGGA	12.2	AGGGTGAGA	6.65	GTGTCTTTCTGGCCTTCTAGGAC	11.36	none	AACCATGGCAATGTCTGAGTGTCAGGTATGAGATG	16.3029098732001,4.22976274996929	31.4910887633644,7.21081561196117	17.0333668107981,3.76958111421634	23.5480248245432,4.96277789832612	NA	NA	9.7	0.366783	NA	NA	-12.3	0.0447848	NA	NA	NA	NA	10.2663	19.351	10.4015	14.2554
GPC2	MATS_only	ENSG00000213420	NA	30372	chr7	-	99773194	99773517	99773829	99773988	99771080	99772388	-12.2	-19.4	323	159	1308	312	806	CAGGTGAGG	10.07	GTTCCCTGCATTTGCTGCAGAGT	7.91	ATGGTGAGG	7.61	CCTTCTTTGCCTTCTCCCAGATA	10.69	downstream	CTCACCCCGCCGCCTCCGCCTGCAGGTGAGGGATC	7.32187	5.36923	14.8344	11.0305	NA	NA	-41.5	0.000696379	NA	NA	-12.2	0.0178949	NA	NA	-19.4	0.0054241	7.32187	5.36923	14.8344	11.0305
HOTAIRM1	MATS_only	ENSG00000233429	NA	59362	chr7	+	27138716	27138985	27135742	27136007	27139397	27139585	-12.2	-15.7	269	265	188	2709	412	ACGGTAAGT	11.81	CGTTTGATTTATGAGCGTAGGAC	1.79	GAGGTGAGA	7.66	TGTTTTTCTCTATCTTTTAGGTC	13.64	none	TGCTTACATGCTGCGTTTTCTCACGGTAAGTAAGT	13.5330406877696,10.0460790546182	11.1927473598718,8.30879234090102	20.8437936929632,15.4731227126882	19.7869064479667,14.688556031776	NA	NA	-8.6	0.677372	NA	NA	-12.2	0.343156	NA	NA	-15.7	0.0227101	11.7896	9.75077	18.1585	17.2377
EIF4G2	MATS_only	ENSG00000110321	NA	64498	chr11	-	10829823	10830055	10830251	10830487	10828801	10828928	-12.2	-2.2	232	236	127	196	895	GAGGTGTGT	6.14	TCCTGTTGCTGACGGAGTAGAAG	-2.89	AAGGTGAGT	10.47	GGTGCTCTTTCTCGTTCCAGGTA	10.4	none	CGGAGCCTGGCCTCCCGGCGGGGAGGTGTGTAGGA	72.8321199274319,68.0355139278105,75.0188098594117	78.9866526334591,73.4540435757241,81.3581244270368	105.00407601824,97.529779544697,108.156687202354	85.5021484748236,79.4388677104238,88.0692395799408	NA	NA	6.1	0.134934	NA	NA	-12.2	0.00824137	NA	NA	-2.2	0.400592	71.9621	77.9329	103.564	84.3368
MPST	MATS_only	ENSG00000128309	NA	62337	chr22	+	37419792	37419968	37415808	37415913	37420232	37420851	-12.1	-22.8	176	105	619	3879	264	GAGGTGAGG	8.41	CCAGCTACTGTTCCTATTAGGTC	5.99	CGGGTAACT	5.86	ACATCCTCCCTGTCGCCCAGGCC	6.36	upstream	CCACCCTCCTGCCCAGCAAGTGGAGGTGAGGGGCG	33.2542322196707,39.628969689874,35.08519205768,39.5557061057944	29.4254859216645,34.9948877278826,30.9824445747182,35.0490228927832	27.9736162238379,33.2586124796329,29.4452471399486,33.4029778500654	47.350243759844,56.247669239817,49.798425079421,56.5877302340791	NA	NA	14.7	0.242085	NA	NA	-12.1	0.413655	NA	NA	-22.8	0.00996127	36.881	32.613	31.0201	52.496
MIB2	MATS_only	ENSG00000197530	NA	37807	chr1	+	1564764	1564946	1564512	1564691	1565018	1565084	-12	-14.5	182	179	66	73	72	AGGGTGAGT	9.25	GCCGCCTCCTCCCCCTGCAGGGA	11.7	CCGGTGAGT	10.9	CCGCGCTCTCCTCTTCGCAGAGT	10.09	none	TGCCAGCACCGCACCGTGTGTGAGGGTGAGTGGGG	13.033873694926,13.0808990961103,13.199960677689,13.9401058614749,14.4960064174282,13.8425295557312	14.6446365938202,14.6974735268105,14.831249074688,15.6628634893213,16.0673193889117,15.5532284283079	23.3667777488267,23.4510836216426,23.6645340186843,24.9914463715423,26.289173960541,24.8165141984039	26.9193103876636,27.0164335760737,27.2623355807103,28.7909830419805,30.1645553292834,28.5894553210376	NA	NA	12.2	0.0469629	NA	NA	-12	0.156414	NA	NA	-14.5	0.029367	13.5989	15.2428	24.4299	28.1238
ATAD5	MATS_only	ENSG00000176208	NA	53605	chr17	+	29206440	29206505	29205020	29205114	29214209	29214390	-12	12.1	65	94	181	1326	7704	CTGGTAAGT	10.65	GTGTGTGTGTGTGTGTGTAGACC	8.41	GTGGTAGGT	7.23	TTTCTCTCTCTGTTTTGAAGCTA	9.16	none	AATCAAGTTCAGTACTCCTTCCCTGGTAAGTTTTA	9.94532	7.71777	4.63296	4.37958	NA	NA	-2	0.369123	NA	NA	-12	0.306778	NA	NA	12.1	0.0253436	9.94532	7.71777	4.63296	4.37958
FAM76B	both	ENSG00000077458	1658	52747	chr11	-	95512241	95512299	95512770	95512851	95511985	95512121	-12.7	-3.3	58	81	136	471	120	CAGGTACAT	7.79	ACTGAATTATATTTCTGCAGGTG	7.92	TAGGTAAAA	6.02	TTTTACTTTTTTCTTTTTAGTAG	8.91	none	TGCCAGTTGCATCCATTTCTGTCAGGTACATATTT	5.94379	4.29794	4.38333	3.05489	2.99333	0.427806	-28.8	0.185098	-12.7	0.0192839	-12	0.879984	-3.3	0.632195	27.2	0.197248	5.94379	4.29794	4.38333	3.05489
ZNF33A	MATS_only	ENSG00000189180	NA	38852	chr10	+	38343302	38343439	38306218	38306314	38353015	38354023	-11.9	-14.5	137	96	1008	36988	9576	GATGTAAGT	9.11	TTAATTTTGCTTGTTTCTAGAAG	7.9	CAGGTGAGT	10.67	CCATCCTTACTCCCTCCCAGGCC	8.16	none	AATAGGAATACCATTTAATGTGGATGTAAGTTCTT	5.81051600471214,5.80766817788415	2.95422583614245,2.95277792280992	4.52569223495015,4.52347412080135	2.59287315835622,2.59160234975059	NA	NA	-2.4	0.348721	NA	NA	-11.9	0.00871609	NA	NA	-14.5	0.0110179	5.80909	2.9535	4.52458	2.59224
DENND1A	MATS_only	ENSG00000119522	NA	64096	chr9	-	126150008	126150137	126165680	126165769	126145933	126146192	-11.9	-4.1	129	89	259	15543	3816	ATGGTCTCT	-5.63	TTTGTCTTCCTCTGCCCCAGCCT	7.26	GCAGTGAGT	7.39	GCCTGCTCTGTCCCCGACAGGCC	10.24	none	TTTTCTTCTCCGCTCCCTTTGAATGGTCTCTCCTT	22.9899460709929,14.2388293383849	25.6313373897665,12.2973980168901	21.7665257972408,16.3592880804638	28.2211916700956,14.5419010871107	NA	NA	1.7	0.539604	NA	NA	-11.9	0.0326112	NA	NA	-4.1	0.815206	18.6144	18.9644	19.0629	21.3815
ANKRD46	MATS_only	ENSG00000186106	NA	23221	chr8	-	101544583	101544688	101545436	101545539	101541750	101542088	-11.9	-1.3	105	103	338	748	2495	caggtggga	6.71	ggtttgtttttttgagacaggcc	1.98	TACGTGAGT	7.77	ACTCACCTATTTCATTACAGGCG	7.92	none	cctctcacctcagcgtcccgaacaggtgggacgaa	5.71532	6.23989	4.93329	4.2881	NA	NA	-9	0.538249	NA	NA	-11.9	0.0391793	NA	NA	-1.3	0.773604	5.71532	6.23989	4.93329	4.2881
SLC39A4	MATS_only	ENSG00000147804	NA	19412	chr8	-	145638620	145638773	145638896	145638951	145638142	145638330	-11.8	-25.9	153	55	188	123	290	TGGGTGAGC	7.23	ACGGGCCTCTGCGCCCGCAGAGT	9.15	CAGGTGAGC	9.6	TAATGTGGACTCGCCCGCAGGGG	6.79	none	TGCCACGAGTTGCCACACGAGCTGGGTGAGCGCAg	4.14363197776391,3.79946889541002	6.37700981547517,5.84997517586057	4.62446176260531,4.2445893385241	6.09331794853616,5.61111783275792	NA	NA	16.4	0.44253	NA	NA	-11.8	0.024855	NA	NA	-25.9	0.103678	3.97155	6.11349	4.43453	5.85222
RPS6KB2	MATS_only	ENSG00000175634	NA	37048	chr11	+	67196383	67196493	67195964	67196094	67196590	67196711	-11.7	-15.4	110	130	121	289	97	AGAGTGAGT	7.36	TTCTCTCCTGGGCCACGCAGTCC	4.57	GCGGTGAGT	10.49	TTAACTCCTTGTGTCCGTAGGCC	11.11	none	CCGAGTTGAGGGCAGCTGGCCTAGAGTGAGTGAGG	35.8367	31.7051	42.0079	55.1162	NA	NA	6.9	0.194383	NA	NA	-11.7	0.465798	NA	NA	-15.4	0.0378144	35.8367	31.7051	42.0079	55.1162
FDPS	MATS_only	ENSG00000160752	NA	42183	chr1	+	155289584	155289719	155289401	155289479	155290199	155290456	-11.7	-7.9	135	78	257	105	480	AAGGTGCCT	5.39	CCCTCCCCCTCCCTGCCCAGGAT	10.6	CAGGTAAGA	10.77	TGTCTTTCAACCTCTTCCAGGAA	10.45	none	TCCAGAACAGTACCAGATCCTGAAGGTGCCTGAGA	859.970059866459,891.751781734649,987.23020325477,1104.44315380843,971.974990400943	256.715959499444,266.166618493921,294.705316734788,329.695412868852,290.151371443081	641.563900370758,665.230167492072,736.503849752978,823.948286763783,725.122995562534	274.407117750883,284.535533085685,315.014449077247,352.415830154981,310.146676133449	NA	NA	-1.2	0.815345	NA	NA	-11.7	0.03295	NA	NA	-7.9	0.137607	963.074	287.487	718.474	307.304
ACAD11	MATS_only	ENSG00000113971	NA	45141	chr3	-	132338311	132338389	132345534	132345661	132337477	132337616	-11.6	-17.9	78	127	139	7145	695	AAGGTAAGA	10.57	TTTTCTTTTATTACTTTAAGGAG	7.33	AAGGTGAGT	10.47	CATGTTCATCACCTTGACAGGAA	7.13	none	ACCTTTAGTGATTGATAAACTCAAGGTAAGAAAAT	7.67584978350929,3.13305784531472	6.45557792041139,2.79834388382768	8.60955276319753,3.43585287644598	6.27820024246668,2.66737393172093	NA	NA	2.9	0.509874	NA	NA	-11.6	0.0628466	NA	NA	-17.9	0.0127595	5.40445	4.62696	6.0227	4.47279
ARFGAP1	MATS_only	ENSG00000101199	NA	42690	chr20	+	61917331	61917570	61917005	61917065	61917717	61917794	-11.6	-16.4	239	60	77	266	147	TCTGTACGT	4.47	CCTTTTCCTCGGTAAGTAAGTGC	-5.05	AAGGTAGGG	8.76	CTCTTCCCGTCTCCTTCCAGGTC	13.71	upstream	CAGAGTGGCCGGGGCGTCTGTGTCTGTACGTGTGT	36.6200274329771,36.3515849594305	35.1079213867725,34.850563380272	65.1633303133909,64.6856516550154	70.7463907733677,70.2277855874908	NA	NA	3.4	0.734342	NA	NA	-11.6	0.0513246	NA	NA	-16.4	0.0248358	36.4858	34.9792	64.9245	70.4871
ARHGAP44	MATS_only	ENSG00000006740	NA	65050	chr17	+	12877405	12877627	12862033	12862214	12883374	12883550	-11.6	8.9	222	181	176	15191	5747	CAGGTAAGC	9.88	GTCTTTGTGTCCCTCGCCAGCAT	7.1	TGGGTATGA	5.85	CTCATGTGCTTTCGTTTCAGCAC	9.19	none	TCCAGCCTGGGCCCGAGCGCACCAGGTAAGCGCGG	3.01804	2.93345	1.83575	1.55156	NA	NA	-7	0.175564	NA	NA	-11.6	0.0356777	NA	NA	8.9	0.46682	3.01804	2.93345	1.83575	1.55156
MRPL55	MATS_only	ENSG00000162910	NA	18009	chr1	-	228296137	228296722	228296849	228297000	228295935	228296019	-11.5	-1	585	151	84	127	118	TTGGTGAGT	9.27	AAGCCCTTGTCCCCATGCAGTCT	4.9	CAGGTTGGC	5.52	CTTCATTCTCTGCCTAGCAGGTT	6.22	within	GTCCAAGGGTTGCTGGGAGAGGTTGGTGAGTGGCG	34.1600847125903,32.3770033677023,34.5101880698204,27.2490849152454,40.7793398818119,36.5433464367245,31.136669024686	28.3685769407108,26.8877995729264,28.6593237029142,22.6292694671566,33.8656022302602,30.3477799830859,25.8577517689437	28.8063253678205,27.3026984942254,29.1015585707117,22.9784560737527,34.3881738820002,30.8160689981335,26.2567562797835	36.655146070349,34.7418280062374,37.0308210666776,29.2393650734576,43.7578733365758,39.2124818426989,33.4108993243604	NA	NA	4.7	0.313969	NA	NA	-11.5	0.0402412	NA	NA	-1	0.631178	33.8222	28.088	28.5214	36.2926
RWDD3,TMEM56-RWDD3	MATS_only	ENSG00000122481	NA	52039	chr1	+	95709766	95710271	95699766	95699871	95712311	95712779	-11.4	-16.9	505	105	468	9895	2040	AATGTTGAG	-17.94	TATTTTTGGATGCCTTCCAGAGA	5.97	CAGGTGACT	6.6	GTTTCTTTTGTATAATGCAGGTT	8.51	none	ACCTCAAGGTGCCAAAAAGTTAAATGTTGAGTATG	9.52032644329809,8.33108402477084,8.66068078332659,9.05712039664787,7.78871216547463	7.84126760862492,7.78776104697232,8.09586270455456,8.46644796919967,7.28076070629131	8.34805979666185,11.5667037825197,12.024309066845,12.5747175804682,10.8136859738167	5.51094065177418,9.31643944443445,9.68501911942471,10.1283474593984,8.7099187841609	NA	NA	15.5	0.185557	NA	NA	-11.4	0.716596	NA	NA	-16.9	0.0321148	8.67158	7.89442	11.0655	8.67013
GALNT7	MATS_only	ENSG00000109586	NA	53218	chr4	+	174216914	174216994	174216546	174216677	174219265	174219448	-11.4	49.1	80	131	183	237	2271	CAGGTAACA	8.88	ACCTGCCTCTTTTTTTTAAGGTT	11.68	CAGGTAGGA	9.79	CTGCCATCAACACAATACAGAAC	1.5	none	TTGTAGCTCCCATATCTAAGGACAGGTAACATTAC	5.61374	5.80343	6.59629	5.50604	NA	NA	-45.3	0.408111	NA	NA	-11.4	0.321674	NA	NA	49.1	0.0189053	5.61374	5.80343	6.59629	5.50604
ARRB2	MATS_only	ENSG00000141480	NA	17333	chr17	+	4618307	4618338	4613783	4614039	4619267	4619328	-11.2	-11.6	31	256	61	4268	929	AAGGTGAGT	10.47	TTCCCTTTCTGTTTTGTTAGGGT	8.93	CAGGTAAGG	11.08	TGACCCCTTGACATCCTCAGCTC	5.2	none	CAAGAAGTCGAGCCCTAACTGCAAGGTGAGTCTCC	30.1144006120616,29.4082265487251	34.003251392262,33.205884892704	31.2685527135592,30.5353141142314	38.5494919268893,37.6455173897814	NA	NA	4.1	0.307437	NA	NA	-11.2	0.0195794	NA	NA	-11.6	0.0469008	29.7613	33.6046	30.9019	38.0975
ARRB2	MATS_only	ENSG00000141480	NA	15388	chr17	+	4618307	4618338	4613788	4614039	4619267	4619328	-11.2	-11.6	31	251	61	4268	929	AAGGTGAGT	10.47	TTCCCTTTCTGTTTTGTTAGGGT	8.93	CAGGTAAGG	11.08	TGACCCCTTGACATCCTCAGCTC	5.2	none	CAAGAAGTCGAGCCCTAACTGCAAGGTGAGTCTCC	30.1144006120616,29.4082265487251	34.003251392262,33.205884892704	31.2685527135592,30.5353141142314	38.5494919268893,37.6455173897814	NA	NA	4.1	0.307437	NA	NA	-11.2	0.0195794	NA	NA	-11.6	0.0469008	29.7613	33.6046	30.9019	38.0975
RWDD3,TMEM56-RWDD3	MATS_only	ENSG00000122481	NA	52035	chr1	+	95709766	95710254	95699710	95699871	95712311	95712773	-11.1	-14.4	488	161	462	9895	2057	AAGGTGCCA	3.41	TATTTTTGGATGCCTTCCAGAGA	5.97	CAGGTGACT	6.6	GTTTCTTTTGTATAATGCAGGTT	8.51	none	ACAGGGAGACAGAAACAACCTCAAGGTGCCAAAAA	8.33108402477084,8.66068078332659,9.05712039664787,7.78871216547463	7.78776104697232,8.09586270455456,8.46644796919967,7.28076070629131	11.5667037825197,12.024309066845,12.5747175804682,10.8136859738167	9.31643944443445,9.68501911942471,10.1283474593984,8.7099187841609	NA	NA	15.6	0.192566	NA	NA	-11.1	0.709503	NA	NA	-14.4	0.0403632	8.4594	7.90771	11.7449	9.45993
FBXW11	MATS_only	ENSG00000072803	NA	10762	chr5	-	171423893	171424055	171433461	171433663	171337575	171337801	-11.1	30.2	162	202	226	9406	86092	CAGGTAAGC	9.88	TGCTTTCTGTCTTTCAACAGTTA	10.85	ATGGTGAGT	10.13	TTTTTGTTTTTCTAAAATAGATA	8.09	none	ATCTGAAGTACAAAATATTTTCCAGGTAAGCAATT	10.4222380105405,10.659901385697,10.5118471997845	8.6062579031799,8.80251059849051,8.68025350684481	8.57142813007677,8.76688658508858,8.6451242714068	7.16602227272982,7.32943257271159,7.22763489809059	NA	NA	-16.8	0.633601	NA	NA	-11.1	0.570252	NA	NA	30.2	0.0198208	10.5313	8.69634	8.66115	7.24103
ZNF550	MATS_only	ENSG00000251369	NA	54583	chr19	-	58055604	58055951	58057824	58059361	58053207	58054611	-11	-21.7	347	1537	1404	1873	993	TAGGCAAGA	1.39	CTCTGTTTTTGTTTTTTCAGGAC	12.03	CAGGTATCT	7.33	AGTAAATTTTATAATTTCAGAAA	4.26	none	TACTATGAACTTGCTGCTGTGATAGGCAAGAATCT	4.31706	4.95797	8.47282	7.58507	NA	NA	11.2	0.23834	NA	NA	-11	0.211238	NA	NA	-21.7	0.00494009	4.31706	4.95797	8.47282	7.58507
STX5	MATS_only	ENSG00000162236	NA	2669	chr11	-	62598490	62598582	62599425	62599523	62595032	62595103	-10.8	-31.6	92	98	71	843	3387	CAGGTAAGG	11.08	CGCCCCTCTGCCCCCCCCAGTGA	8.31	GAGGTAAGA	10.06	CTCCTGCCATTGCTTTTCAGAAT	9.35	none	CTGCAAGTCGCTGCAGACCCGTCAGGTAAGGACCT	15.2510675195964,15.5670656470471	14.1760203287394,14.4697437597601	14.6805493228499,14.9847264625818	17.7540567954055,18.1219162055611	NA	NA	-3.5	0.223566	NA	NA	-10.8	0.00968752	NA	NA	-31.6	0.268294	15.4091	14.3229	14.8326	17.938
TESK2	MATS_only	ENSG00000070759	NA	69807	chr1	-	45923235	45923543	45956523	45956840	45887396	45887518	-10.7	7.9	308	317	122	32980	35717	AAGGTGAGT	10.47	AATTTTTTTGATCTCTTTAGTGT	7.65	CAGGTAACG	10.52	TGTTCTATTTAATATTCTAGGTA	9.81	none	TGGCTTCTTTTCTGAAGTGTTCAAGGTGAGTGAGT	5.43488	4.55566	5.69649	4.79024	NA	NA	-7.9	0.188006	NA	NA	-10.7	0.0409577	NA	NA	7.9	0.395099	5.43488	4.55566	5.69649	4.79024
HNRNPA2B1	MATS_only	ENSG00000122566	NA	12803	chr7	-	26230612	26230748	26232114	26232197	26229744	26230080	-10.5	-12.3	136	83	336	1366	532	ATGGTAGGT	8.6	TTTCCCTGCCGGAATTTTAGCAT	5.09	TGGGTAAGT	10.24	CTTTTTTTTTCCTTTGGCAGGAA	10.18	none	CTTCAGTGGTGTTGGTAGTAAAATGGTAGGTAAAA	154.75857614742,153.253630512275	136.548222400549,135.220362863429	117.68296907873,116.538564193038	122.175078248196,120.986989967014	NA	NA	0.4	0.984982	NA	NA	-10.5	0.0231613	NA	NA	-12.3	0.065336	154.006	135.884	117.111	121.581
BLK	MATS_only	ENSG00000136573	NA	36392	chr8	+	11400732	11400856	11351509	11352100	11403560	11403612	-10.3	-5	124	591	52	48632	2704	CTGGTGAGT	10.1	CTGCTGTGTGTCTCCGACAGGAT	10.41	AAGGTGAGG	9.16	GTGTGTGTTTTCTACCCAAGGTT	7.98	none	GGACGCCCCGCCACTGCCGCCCCTGGTGAGTGATT	2.93129	3.30975	4.68254	3.74082	NA	NA	-0.2	0.900271	NA	NA	-10.3	0.0432205	NA	NA	-5	0.363076	2.93129	3.30975	4.68254	3.74082
2015-09-15	MATS_only	ENSG00000183291	NA	33766	chr1	-	87333735	87333785	87346344	87346408	87328983	87329288	-10.3	-2.5	50	64	305	12559	4447	AAGGTAAGG	10.51	TTTTTTTCTTTTTTTATAAGCTT	7.07	AAGGTATAT	7.84	GACGTCCCTCTTTTTTGTAGTAT	7.18	downstream	ACTGTTCAGAGGACTGCAAATCAAGGTAAGGTGAT	50.0150581124781,48.6559532724652	51.0300046046297,49.6433196968952	47.0365852508293,45.7584171733612	50.6463818275572,49.2701214518084	NA	NA	2.4	0.679312	NA	NA	-10.3	0.0345921	NA	NA	-2.5	0.560338	49.3355	50.3367	46.3975	49.9583
KIF9	MATS_only	ENSG00000088727	NA	69341	chr3	-	47318771	47318869	47323984	47324337	47316814	47316980	-10.3	-2.3	98	353	166	5115	1791	AGAGTAAGT	9.35	CATTGTTCCCTTCTTTTTAGCTA	8.91	ACGGTGAGC	9.44	TTCTCACTCTTTTTTCCTAGAGC	9.15	downstream	GATCAGATACGGAGATGACAAAAGAGTAAGTGCGA	1.66998150189935,1.46557910324889,1.57297632082387	1.336355247349,1.17278803555857,1.25872960742256	2.66311659224323,2.33715644315101,2.50842259894939	1.9580066625305,1.71835055978947,1.84427079741479	NA	NA	-5	0.148398	NA	NA	-10.3	0.0242988	NA	NA	-2.3	0.416239	1.56951	1.25596	2.5029	1.84021
ATP5L	MATS_only	ENSG00000167283	NA	16246	chr11	+	118276371	118276424	118274638	118274700	118277651	118277812	-10.3	11	53	62	161	1671	1227	AAGGTATGC	9.55	TTTATTGTCCCATCTTTCAGGCA	10.09	AAGGTAATT	8.83	tgttttgttttgttttCCAGCTG	11.1	upstream	CTTAGAGCTTTGTGTCTGCTTAAAGGTATGCCCAT	76.5989873138205,79.6331773942634	65.2017696516407,67.7845004375428	74.265076606703,77.2068173093601	86.6167658430092,90.0477737575678	NA	NA	-11	0.018277	NA	NA	-10.3	0.0251588	NA	NA	11	0.039447	78.1161	66.4931	75.7359	88.3323
SAMD4B	MATS_only	ENSG00000179134	NA	21979	chr19	+	39842456	39843014	39838927	39839029	39844645	39844706	-10.3	23	558	102	61	3427	1631	caggtatgt	9.8	caagaacttattttccttagtag	0.62	caggtgagc	9.6	ATTCCCATTCATTTcttcaggat	8.93	none	TGCTCTTCTGTTccaaggaccacaggtatgtcttc	8.97811	15.5458	9.92273	14.0011	NA	NA	-36.1	0.0313529	NA	NA	-10.3	0.791278	NA	NA	23	0.0248802	8.97811	15.5458	9.92273	14.0011
ODF2	MATS_only	ENSG00000136811	NA	36424	chr9	+	131219476	131219716	131218431	131218534	131221845	131221936	-10.2	-26.9	240	103	91	942	2129	CAGGTATTG	8.35	ATTTCCCCCTACTTTGGCAGGAC	7.57	CTGGTGAGA	7.54	GTTCTTGTGCCTGGGTGCAGGTT	6.99	none	CCTCATCCTCAGGCGGCTCCCCCAGGTATTGCCGA	30.0377290791765,30.9550217588817,28.0372435352075,32.5287854283487,25.2629138202821,32.0430294905819,26.4762105749269,24.0606594787668,25.8379023435744,31.0358395200652,25.2802964209779	24.9034802093806,25.9291839469941,23.0821100536585,26.9805392527986,21.20141723459,26.5660213081988,22.0632309683513,20.0502970705939,21.5313141406968,25.7309869608374,21.0666483901071	25.9603318025558,27.4207170288269,24.8827740834585,28.1249737457232,22.4814890857401,27.6934276669823,23.1673934590047,21.0537215456205,22.6088566585055,26.8229562091068,22.1209365399029	25.1516040833178,26.5712324609624,23.5262036743345,27.2575085092545,21.8632720055403,26.8307097801179,22.5274153504963,20.4721316953997,21.9843076195534,25.9873556334595,21.5098658490937	NA	NA	19.3	0.0202104	NA	NA	-10.2	0.0306929	NA	NA	-26.9	0.000786292	28.3232	23.555	24.758	23.9711
RFC5	MATS_only	ENSG00000111445	NA	56218	chr12	+	118455494	118455620	118454507	118454697	118456876	118456941	-10.2	1.9	126	190	65	797	1256	gaggcgagc	0.95	TACGTAttttttttttttagaga	8.72	CTGGTAGGA	6.77	CATACTAAATTGTATTTCAGGGT	7.5	none	ctccgaagaactgggacttttagaggcgagctacc	19.082387479782,22.3758863146045,22.4717829702386,21.114426951902	17.5299535142346,20.5555121103377,20.6436071622392,19.3966778705603	10.0948132186972,11.8371138406061,11.8878443284944,11.1697866173773	9.41455903346085,11.039452105144,11.0867640427375,10.4170937314312	NA	NA	-9.3	0.653485	NA	NA	-10.2	0.0141163	NA	NA	1.9	1	21.2611	19.5314	11.2474	10.4895
PDHA1	MATS_only	ENSG00000131828	NA	59223	chrX	+	19372608	19372701	19371199	19371291	19373466	19373622	-10.1	-31.4	93	92	156	1317	765	CAGGTAATT	8.55	TCGGTTGTCCTTAATGTTAGGTG	6.92	CAGGTAGTC	5.3	CTTTTCGTAACTACTTCCAGGGC	7.75	none	ATATGGCGATGGTGCTGCTAACCAGGTAATTATGT	15.4039188031304,14.8863689229191,14.9790776261757,14.4892282717913	12.6088427988212,12.1852035182242,12.2610900170032,11.8601249389945	13.7643909507751,13.3019268870002,13.3847680686808,12.9470562041284	11.411884818029,11.0284616322774,11.097144222514,10.7342427763388	NA	NA	1.8	0.674859	NA	NA	-10.1	0.0249958	NA	NA	-31.4	0.0669671	14.9396	12.2288	13.3495	11.0679
HPS1	MATS_only	ENSG00000107521	NA	31885	chr10	-	100189547	100189646	100190327	100190427	100189329	100189399	-10.1	-18	99	100	70	681	148	ACGGTGTGT	6.96	CTCTCCCCTGCCCTGCACAGCCT	7.77	CAGGTCTCA	-0.37	AGCCACCTTCTCCATTCCAGGAG	7.78	none	AACTGGGGGGAGCTCTGCAGAGACGGTGTGTGCTG	9.09638054191059,13.2662611762375	11.1441610585624,16.3487553043665	13.234694439085,16.2088474925997	16.2548101264428,21.2147986465236	NA	NA	1.3	0.292215	NA	NA	-10.1	0.38639	NA	NA	-18	0.0414516	11.1813	13.7465	14.7218	18.7348
PUF60	MATS_only	ENSG00000179950	NA	64037	chr8	-	144906482	144906566	144911449	144911469	144903987	144904083	-10.1	-16.4	84	20	96	4883	2399	CAGGTACTG	9.04	CTCCTTCCTGCCTGCAGCAGGTC	5.82	CTCGTAAGT	9.63	TTCCCCTGCTCCCTTACCAGGGC	10.63	none	ggGAGACAAATGGAAACCTCCACAGGTACTGACCT	39.7824207422432,40.8874879850833,40.8520211939453	48.3938053741506,49.7380777456547,49.6962232380128	46.0042480855531,47.2821438657074,47.267575305236	54.9039043743468,56.4290128291897,56.3857447984817	NA	NA	-6.2	0.489118	NA	NA	-10.1	0.0646931	NA	NA	-16.4	0.0220963	40.5073	49.276	46.8513	55.9062
STAG3L4	MATS_only	ENSG00000106610	NA	5348	chr7	+	66770973	66771070	66767657	66767752	66773921	66774126	-10.1	-15	97	95	205	3221	2851	AAGGTGAGG	9.16	CTGTATTTTTTTTTTACTAGTCT	7.17	CAGGTAAAA	8.59	TTTCATACATCCTTTTGTAGGAC	9.23	none	TTCATCTGATCTTGTGGATGTAAAGGTGAGGAAAC	7.39303510005614,7.13787130913686	7.13204653072481,6.88589051967345	5.75652968175886,5.55784836667544	5.16572221282786,4.98743207287558	NA	NA	-11.5	1	NA	NA	-10.1	0.0471471	NA	NA	-15	1	7.26545	7.00897	5.65719	5.07658
PBRM1	MATS_only	ENSG00000163939	NA	29276	chr3	-	52718871	52718930	52719764	52719810	52713649	52713742	-10.1	44.8	59	46	93	834	5129	GAGGTGTTT	1.54	TTTTGCTTTATTACTTACAGGTC	10.51	TGGGTAAGG	9.08	TGGCTGATTATTTCTTATAGAAG	4.55	none	AGATTGGAAAATATGTTTTGAAGAGGTGTTTCAAA	10.4393284323387,10.6470260734515,10.5231560161102	8.99824236783977,9.27783610306131,9.07049806137167	9.01486165684128,9.18742419611834,9.08725080290799	7.27337856980871,7.53822652947568,7.33178364397741	NA	NA	-13.6	0.74796	NA	NA	-10.1	0.600392	NA	NA	44.8	0.0043482	10.5365	9.11553	9.09651	7.38113
REPIN1	MATS_only	ENSG00000214022	NA	46868	chr7	+	150067848	150067973	150065878	150066030	150068319	150068721	-10	13.2	125	152	402	1818	346	CTGGTGAGT	10.1	ttgcttcatctgttaaacaggga	7.22	GAGGTAcgg	9.4	TGCTTTTCCACCCTCAGCAGAGG	4.92	upstream_and_within	TAGGGAGCAGTGGCCACATTTTCTGGTGAGTCCTG	48.604559304041,45.5658151479942,43.8356429446226	55.8195188932965,52.329697377391,50.3426948949567	36.017395643278,33.7655976207427,32.4834895701374	41.3412319602481,38.7565891032449,37.2849689216211	NA	NA	-20.8	1	NA	NA	-10	0.0110941	NA	NA	13.2	1	46.002	52.8306	34.0888	39.1276
NECAP1	MATS_only	ENSG00000089818	NA	14378	chr12	+	8244364	8244446	8242790	8242895	8245271	8245380	-9.9	30.4	82	105	109	1469	825	CAAGTGAGT	9.1	TCTTCCTACGTTTTCCACAGGGC	11.39	CTGGTAAGA	9.45	aACTTGCTGTGTTCCCAAAGGTG	7.83	none	ATGTCTCCTTGCAGGATCACTTCAAGTGAGTGAAG	8.66696741340005,8.39288668532492	8.05722195424946,7.80242357389911	9.5272575487355,9.22597134781135	7.31163007340386,7.08040999395183	NA	NA	-23.6	0.170592	NA	NA	-9.9	0.690191	NA	NA	30.4	0.00404695	8.52993	7.92982	9.37661	7.19602
APLP2	MATS_only	ENSG00000084234	NA	52568	chr11	+	129993506	129993674	129992199	129992408	129996594	129996725	-9.8	-27.5	168	209	131	1098	2920	TGAGTAAGT	8.82	CTCTGACCATTTTCACACAGCTG	6.2	AAGGTAACC	9.24	CCTCTGTAATTTTGTTTCAGTTC	8.83	none	TGTATGGCTGTGTGTAAAGCGATGAGTAAGTCCTG	12.9516543547437,11.3683723690903,12.0111517380744,11.4767572751516,14.0292118714705,10.8838751400437,13.2364799850252	12.1224238447234,10.6405115908826,11.2421369690811,10.7419571463041,13.1309906715586,9.94956350595914,12.3890134955542	14.8091287945323,12.9987788422102,13.7337430561267,13.1227078777821,16.0412252983183,12.9149708118682,15.1348029769411	14.3740159823528,12.61685663089,13.3302265734348,12.7371444589387,15.5699117762877,12.4751944624178,14.6901214040784	NA	NA	-4.8	1	NA	NA	-9.8	0.190674	NA	NA	-27.5	0.00258837	12.2796	11.4595	14.1079	13.6848
SF1	both	ENSG00000168066	2467	49117	chr11	-	64533422	64533627	64534371	64534551	64532077	64532990	-24.8	-4.6	205	180	913	744	432	GATGTATGC	3.89	GGGCTTCTTTACCACCCCAGATA	6.11	AAAGTGAGT	8.4	TCCCCAAACCGGGCCGCCAGGAT	3.03	none	CACCGCCTGGTTCCGCCGGCATGATGTATGCCCCG	64.0953644871662,62.1157506841334,64.0062503203435,62.3589509555125,53.1357328195522,51.3513614533264,62.4435341375478,58.3849024006431	75.45229024355,72.8898983159783,75.3473861208617,73.4082051709174,62.2734752781645,60.4502035331063,73.5077754729465,68.7300031292705	68.6621725562676,66.2202623195749,68.5667089864987,66.802039198834,56.6468481387018,55.0101566520236,66.8926489502058,62.5448388567396	70.6890307914971,68.1262203942759,70.5907492054123,68.7739876274877,58.0090083315318,56.6340171399808,68.8672721139272,64.391117775514	-0.72	0.884992	6.6	0.393027	-24.8	0.000286647	-9.7	0.471246	-4.6	0.566719	-5.8	0.294687	59.7365	70.2574	63.9182	65.7602
FOXRED1	MATS_only	ENSG00000110074	NA	38969	chr11	+	126141613	126141750	126139086	126139186	126142863	126142974	-9.6	-63	137	100	111	2427	1113	AAGGTTTGT	7.81	AGATGACTCATTTTATTAAGGAC	2.57	TGGGTAAAG	4.2	CTTTTCTTGTCTTTCCACAGTAT	10.97	none	TCGAACCAGGAAGCTTGGCAATAAGGTTTGTTCTT	13.2206736836755,13.1004857410967,14.8000082156173	18.1707428868839,18.005554315185,20.3414100101279	10.8410662930838,10.7425111449649,12.1361342124198	14.7292857059795,14.5953831086524,16.4888382146397	NA	NA	0.8	0.824574	NA	NA	-9.6	0.0865844	NA	NA	-63	0.0174223	13.7071	18.8392	11.2399	15.2712
GAR1	MATS_only	ENSG00000109534	NA	3347	chr4	+	110737308	110737534	110736983	110737161	110739091	110739246	-9.6	-25.8	226	178	155	147	1557	TCTGTATGC	0.77	GGTCGTTTTTTTTTCATCAGGGA	7.75	CAGGTTGGT	8.08	ATTTTCTTGTCCTGTTTCAGTAT	9.68	none	CAAGGACCTCCAGAACGTGTAGTCTGTATGCAGTC	8.81118096093776,11.0751649578454	6.64271110162124,8.34951881523226	9.31211113353779,11.7048063553496	9.70781055223165,12.2021785413467	NA	NA	NA	NA	NA	NA	-9.6	0.0108676	NA	NA	-25.8	0.00483724	9.94317	7.49611	10.5085	10.955
SLC2A8	MATS_only	ENSG00000136856	NA	13497	chr9	+	130159654	130159817	130159420	130159565	130162185	130162285	-9.5	-10.9	163	145	100	89	2368	GGGGTGAGG	5.5	CCTCGGCCCTGTCCCCCCAgcgc	10.07	CAGGTGAGC	9.6	CCTCATCTGATTGCTGGCAGGTC	7.14	none	CGACGCCGCCGCCTCCTGGTTCGGGGTGAGGCCCC	4.38217	3.80447	5.12233	7.44923	NA	NA	1.9	0.759268	NA	NA	-9.5	0.0992116	NA	NA	-10.9	0.0474773	4.38217	3.80447	5.12233	7.44923
ITGAE	MATS_only	ENSG00000083457	NA	55820	chr17	-	3626581	3626677	3626981	3627038	3623600	3623696	-9.1	-21.2	96	57	96	304	2885	GAGGTGTTT	1.54	ACTAGACCTCGCTTTTCCAGCAT	5.71	CAGGTAAGC	9.88	TTCCTTTCCCCATCTTCTAGTTA	9.07	downstream	GATCTCCTGGGATCACTCTGAGGAGGTGTTTGAGA	14.9596	13.0353	24.4076	14.6137	NA	NA	21.2	0.000261911	NA	NA	-9.1	0.0284577	NA	NA	-21.2	0.0002013	14.9596	13.0353	24.4076	14.6137
GOLGA4	both	ENSG00000144674	6700	15170	chr3	+	37327504	37327552	37323448	37323763	37330725	37330782	-8.6	-16.2	48	315	57	3741	3173	CAAGTAAGT	10.08	TGTTGATGACTATATTTTAGCTT	4.35	GAGGTAGGA	8.24	TTTTTCTCTCTCAATTAAAGGGT	9.23	none	TCAGAGAGAGAAGAAAAAGCTACAAGTAAGTGATT	12.6029891876512,12.6318216489346	8.40232082583062,8.42154321714543	9.32916922591218,9.35051201265169	6.33207139767142,6.34655758033005	-3.1	0.34321	14	0.391863	-8.6	0.0294708	-9.1	0.683644	-16.2	0.00173523	-18.1	0.0184783	12.6174	8.41193	9.33984	6.33931
PNPLA8	MATS_only	ENSG00000135241	NA	21454	chr7	-	108161919	108161965	108166472	108166638	108154879	108156018	-8.9	44.9	46	166	1139	4507	5901	TAAGTAAGT	8.07	tttgtttTATTTCTCAATAGATT	9.44	CCGGTAAGT	10.91	TTTTTTTCTTGCCATTTCAGGTA	11.72	none	TACATGATTACCTGAAGTTTAATAAGTAAGTGGAT	3.65307747775215,3.68882339648787,3.84078821415049,3.56887400429913	2.68406871420394,2.71033273480666,2.82198763816747,2.62220090272199	3.99047752990455,4.02952495946754,4.19552532324627,3.89849698177751	3.17781503102702,3.20891043443635,3.34110475133672,3.10456636186155	NA	NA	-36.9	0.325635	NA	NA	-8.9	0.816212	NA	NA	44.9	0.0265344	3.68789	2.70965	4.02851	3.2081
USF2	both	ENSG00000105698	3389	56246	chr19	+	35760705	35760906	35760483	35760602	35761349	35761500	-8.5	-12	201	119	151	103	443	CTGGTAGGT	8.37	CGCTCTGCCGCCCCCTGCAGGTG	11.87	CAGGTGAGC	9.6	TCTGCCCTCCTACTCCCCAGGCT	8.86	none	AGGTCCTGCAGCGCCCTTCCCGCTGGTAGGTGCCC	47.1541489098585,53.4392841425386	56.1538665500184,63.6385662692184	61.4196514434028,69.6062230217344	77.204162235916,87.4946374411011	13.6133	1.47e-09	3.1	0.56805	-8.5	0.149583	-8.7	0.122475	-12	0.0169084	-8.3	0.325855	50.2967	59.8962	65.5129	82.3494
RNF8	MATS_only	ENSG00000112130	NA	15617	chr6	+	37344701	37344809	37336259	37336994	37358517	37358838	-8.7	25.6	108	735	321	7707	13708	GAGGTAATT	8.88	TAGGATTGTGTGTCTTGCAGGAA	8.75	CAGGTACCA	7.88	TCTCTTCTTTTTCTCCAAAGCAA	8.42	none	TATTTGTTCAGAATACTTCATTGAGGTAATTATGA	5.30967074863591,5.11636893661844	4.1611747627548,4.00968464974384	4.2254148189081,4.07158600735133	4.05090084170201,3.90342531825166	NA	NA	-5	0.36445	NA	NA	-8.7	0.278506	NA	NA	25.6	0.0307669	5.21302	4.08543	4.1485	3.97716
PUF60	MATS_only	ENSG00000179950	NA	64031	chr8	-	144906482	144906569	144911449	144911485	144903987	144904083	-8.5	-18	87	36	96	4880	2399	CAGGTACTG	9.04	CATCTCCTTCCTGCCTGCAGCAG	9.23	CTCGTAAGT	9.63	TTCCCCTGCTCCCTTACCAGGGC	10.63	none	ggGAGACAAATGGAAACCTCCACAGGTACTGACCT	39.7824207422432,40.8874879850833,40.8520211939453	48.3938053741506,49.7380777456547,49.6962232380128	46.0042480855531,47.2821438657074,47.267575305236	54.9039043743468,56.4290128291897,56.3857447984817	NA	NA	-4.2	0.592374	NA	NA	-8.5	0.0497795	NA	NA	-18	0.0232256	40.5073	49.276	46.8513	55.9062
ATP6AP2	MATS_only	ENSG00000182220	NA	38451	chrX	+	40456500	40456596	40450485	40450617	40456778	40456916	-8.5	11.3	96	132	138	5883	182	GAAGTAAGT	9.82	TTCTTACTCTTAAATTTCAGGCA	8.57	AATGTGAGt	7.8	ATTTTCTATTCTTCTTACAGAGA	9.65	none	TTTGCAGTTGGCTCCCAGTGAGGAAGTAAGTGATA	8.54512	8.96307	9.76	10.5415	NA	NA	-5.9	0.451834	NA	NA	-8.5	0.859914	NA	NA	11.3	0.0226511	8.54512	8.96307	9.76	10.5415
RP11-274B21.1	MATS_only	ENSG00000242588	NA	17391	chr7	+	128220052	128220148	128214773	128214845	128231903	128232071	-8.5	48.3	96	72	168	5207	11755	CCGGTAAGC	8.8	TGTTTTTCCCTGTTGGCCAGTTT	5.87	GAGGTAAGA	10.06	GTTTCTTTACTGTTTTCCAGTGA	7.98	none	ACATTCCTTATCCAATCCCTTACCGGTAAGCATTC	not_in_refSeq	not_in_refSeq	not_in_refSeq	not_in_refSeq	NA	NA	-39	0.595596	NA	NA	-8.5	0.26371	NA	NA	48.3	0.0147485	not_in_refSeq	not_in_refSeq	not_in_refSeq	not_in_refSeq
TMEM18	MATS_only	ENSG00000151353	NA	1293	chr2	-	675757	676238	676573	676642	675557	675630	-8.2	-16.5	481	69	73	335	127	TTGGTGAGT	9.27	GAGCCAGACACTGTCCCCAGGTA	3.31	CTGGTGGGT	6.29	CTGCTGGTGTGTTCCTACAGCAG	8.01	none	CCTGGCAATGCTCTCTGGATACTTGGTGAGTAGCC	24.6316	21.3889	19.6694	17.9179	NA	NA	3.1	0.745353	NA	NA	-8.2	0.165475	NA	NA	-16.5	0.0423137	24.6316	21.3889	19.6694	17.9179
PTPRC	MATS_only	ENSG00000081237	NA	23046	chr1	+	198663146	198663269	198661475	198661502	198665840	198666038	-8.2	-14.5	123	27	198	1644	2571	ggagtaagt	8.57	gaggtgaattcccacaataggcc	3.55	CTGGTAAGa	9.45	CATTTTCCATTAATTAACAGGAT	8.12	within_and_downstream	cgagagcccctcacaaaccactggagtaagtccaa	45.7159495018043,41.5732096126164	68.6503989008225,62.429359000429	80.2829175955514,73.0077488903635	84.6014195999442,76.9349119701556	NA	NA	5.9	0.51341	NA	NA	-8.2	0.00331532	NA	NA	-14.5	0.00014688	43.6446	65.5399	76.6453	80.7682
TCP11L2	MATS_only	ENSG00000166046	NA	35266	chr12	+	106697870	106698009	106696610	106696719	106704818	106705010	-8.1	-58.4	139	109	192	1151	6809	CAGGTATTA	7.26	CCTTTTCCTCTCTTCTCTAGGGA	12.5	CCGGTGCGT	9.74	GGGTCTGTTTGTCTGTGCAGGTG	9.62	none	GAGGGCCCCAGAGGGGGAAGCACAGGTATTAAAAC	1.45227	1.80905	2.72853	2.11488	NA	NA	49.8	1	NA	NA	-8.1	1	NA	NA	-58.4	0.010599	1.45227	1.80905	2.72853	2.11488
TBC1D23	MATS_only	ENSG00000036054	NA	63436	chr3	+	100030676	100030721	100029246	100029386	100034942	100035031	-7.9	-58	45	140	89	1290	4221	GCGGTAAGC	8.99	TCTGCCTTGATTTGCTATAGAAT	7.39	TCGGTGAGT	11.11	CTAAAATTCTTTGAATATAGGCA	3.4	none	GGCCAGACAGATCATGTACAGAGCGGTAAGCCAAT	5.77132747536627,5.70402772507047	4.00843928063801,3.96169666140279	4.40225860581747,4.35092363891885	2.97829114995508,2.94356114172808	NA	NA	-5.2	0.569303	NA	NA	-7.9	0.0414785	NA	NA	-58	0.00114794	5.73768	3.98507	4.37659	2.96093
APBB3	MATS_only	ENSG00000113108	NA	43866	chr5	-	139941428	139941580	139941684	139941812	139941171	139941286	-7.9	-13.8	152	128	115	104	142	CAGGTGAGT	10.67	ACTTGAACCCCTGGACACAGATC	3.11	CCGGTGAGG	9.35	CCCATCTCTGCCCCTGCTAGGGA	7.7	none	CCACATGCTTCCGGAACAGTGACAGGTGAGTGAAA	18.7280262781178,18.6754440798638,18.5452713748462,18.4937089891886	23.6018351854479,23.5355689191341,23.3715198792702,23.3065388230721	21.7337424567723,21.672721186421,21.5216566800101,21.4618188949869	23.6440334754719,23.5776487301033,23.4133063830068,23.348209145612	NA	NA	1.6	0.679654	NA	NA	-7.9	0.0479077	NA	NA	-13.8	0.0231723	18.6106	23.4539	21.5975	23.4958
TBC1D15	MATS_only	ENSG00000121749	NA	10470	chr12	+	72301642	72301769	72300801	72300918	72307605	72307706	-7.9	-12.8	127	117	101	724	5836	atggtgaaa	0.56	TTGGTAAATCTCTTTACCAGAAA	4.98	TAGGTAAGT	9.66	ATTTTTTCTTTTCTTTTTAGGAT	13.07	none	gttcaagaccagcctggccaacatggtgaaacccc	10.2740149165384,10.2018486305048,10.7604247300789,10.3652202708888	6.35532324831697,6.31068246483556,6.65620772447509,6.41174126148741	8.2142192022127,8.15652124310858,8.60311067871789,8.28713916379892	5.82268102031023,5.78178159906084,6.09834824606399,5.87437061683518	NA	NA	8.6	0.326288	NA	NA	-7.9	0.087902	NA	NA	-12.8	0.0267452	10.4004	6.43349	8.31525	5.8943
PLEKHA4	MATS_only	ENSG00000105559	NA	25548	chr19	-	49342461	49342520	49344405	49344567	49341273	49341386	-7.8	-19.7	59	162	113	1885	1075	TAGGTAAGG	9.31	ATGCCCCAATTCCTTTCCAGCCT	6.75	AGGGTGAGG	7.13	aatcttctttttttttctAGTCC	8.82	none	TCAGAAGCTCTGGGTCCTGGAGTAGGTAAGGAACT	1.89471709797566,2.09595005850699	2.01287894274865,2.22666156458346	3.73340214469987,4.12991704776093	4.86446150483625,5.38110327212421	NA	NA	29.2	0.0243172	NA	NA	-7.8	0.2199	NA	NA	-19.7	0.0339445	1.99533	2.11977	3.93166	5.12278
FAM113A	MATS_only	ENSG00000132635	NA	11296	chr20	-	2816684	2816960	2818877	2819124	2815959	2816355	-7.7	-25	276	247	396	1917	329	TAGGTAGGT	7.92	AACAACCATCCCATTCCTAGACC	6.55	CTGGTGAGC	8.05	AATGACTGGTTCTTTTGTAGGAT	8.96	none	GACTTCTCGATGCCACCCCACTTAGGTAGGTGCTT	28.3031	35.6851	40.4593	53.1961	NA	NA	-0.5	0.926739	NA	NA	-7.7	0.293817	NA	NA	-25	4.85e-05	28.3031	35.6851	40.4593	53.1961
TSTD1	MATS_only	ENSG00000215845	NA	53333	chr1	-	161008340	161008484	161008669	161008740	161007702	161007865	-7.6	-23.8	144	71	163	185	475	CGGGTATAG	4.4	TAGGCCCCCTCTTCCTGAAGGCT	5.29	GAGGTACCT	7.63	TACCCTCTCCACTCCTCCAGTGT	8.13	none	ATCCCAGGGGCGCTCAACATCCCGGGTATAGGGTG	30.4292205574869,38.5130091721109	28.1698335145633,35.6533961976978	39.5325604233605,50.0347309030006	36.5240813221433,46.2270230124751	NA	NA	14.3	0.00574402	NA	NA	-7.6	0.482046	NA	NA	-23.8	0.00106495	34.4711	31.9116	44.7836	41.3756
RPTOR	MATS_only	ENSG00000141564	NA	25144	chr17	+	78899169	78899280	78897289	78897473	78914295	78914401	-7.6	-12	111	184	106	1696	15015	AAGGTGCGC	9.05	CTCCTGCTTAAACCCTGAAGACT	0.85	CAGGTACGG	10.88	GGTGTTTTCTGTTGTTGAAGATC	4.58	none	CTATTTTGCCCAGCCCGTCATGAAGGTGCGCCCGG	8.20560467758354,7.63829770308316	8.95570842456997,8.33654188529836	14.7169922804402,13.6995106087761	13.414986325545,12.4875208182071	NA	NA	0.7	0.771228	NA	NA	-7.6	0.129588	NA	NA	-12	0.0298447	7.92195	8.64613	14.2083	12.9513
PHTF2	MATS_only	ENSG00000006576	NA	18810	chr7	+	77567026	77567155	77558425	77558644	77569346	77569619	-7.5	-31.5	129	219	273	8382	2191	AGAGTGAGT	7.36	aattttttttttttttataGAGT	8.49	CAGGTTGGT	8.08	CTTCCCCTGGCTCCCTCAAGGTG	8.19	none	AATCAGTGGAATGATAATGAACAGAGTGAGTTTTT	9.64029375982502,8.76666575321618,8.7456593656286	6.76452192831052,6.33939746605467,6.32420721653537	10.2700981265478,9.55275646383981,9.52986647231304	7.02045062967666,6.62925212107975,6.61336733165224	NA	NA	17.9	0.160149	NA	NA	-7.5	0.552291	NA	NA	-31.5	0.00712085	9.05087	6.47604	9.78424	6.75436
MAGOHB	MATS_only	ENSG00000111196	NA	8473	chr12	-	10765413	10765577	10766037	10766172	10763220	10763279	-7.5	-19.1	164	135	59	460	2134	GAGGTGAAA	2.91	CGTGTAATTGTTCACCATAGGAC	8.03	ACGGTGAGA	8.94	TTTTTTTCCACTTCCCACAGGAA	11.68	none	cagagcagtatgagcagaggATGAGGTGAAACTGC	4.33438	3.63314	2.70939	2.8856	NA	NA	11	0.545166	NA	NA	-7.5	0.0428384	NA	NA	-19.1	0.0359739	4.33438	3.63314	2.70939	2.8856
SREBF1	MATS_only	ENSG00000072310	NA	62662	chr17	-	17720861	17720905	17721009	17721230	17720569	17720771	-7.5	-18.1	44	221	202	104	90	aaggtgggc	7.93	tcctacctcccatttcatagaca	7.19	AAGGTTGGG	4.94	ACCCTGCCCAACCCCACCAGGCA	6.1	none	gagccacgtggggtcccacagtaaggtgggcagaa	53.7950863671199,52.8269684360979	46.7560791784297,45.9146380414454	45.5556184418824,44.7357812773614	41.0988658528497,40.3592341938302	NA	NA	-2	0.484137	NA	NA	-7.5	0.141046	NA	NA	-18.1	0.00789655	53.311	46.3354	45.1457	40.7291
CPNE7	MATS_only	ENSG00000178773	NA	34842	chr16	+	89657534	89657668	89657414	89657466	89661774	89662011	-7.5	-10.8	134	52	237	68	4106	TCTGTAGGT	2.49	TCACCCCCTGCCCCCCACAGGCA	10.4	AAGGTAGGA	9.45	TGCCTTTCCTGTGCCCCCAGCAA	8.56	none	CGAGGAGAGCACCGGGAAAGCCTCTGTAGGTGCCC	18.9400060164065,20.692268086181	24.7034586694103,26.9889349032168	15.5559463933178,16.9951272890812	21.8118234332546,23.8297758479266	NA	NA	-3	0.523078	NA	NA	-7.5	0.129392	NA	NA	-10.8	0.0344477	19.8161	25.8462	16.2755	22.8208
KLHL24	MATS_only	ENSG00000114796	NA	45817	chr3	+	183361267	183361330	183353407	183353535	183368083	183369064	-7.4	31.8	63	128	981	7732	6753	AAGGTATAT	7.84	CTATTCTTTCTTTATTTTAGGTG	12.49	GAGGTACCG	8.5	TTTCCTTTTTTTACTTTTAGCCA	9.36	none	CTTTGATCAACCAAATGCTAAAAAGGTATATTTGT	6.4137	4.08406	7.59087	4.32469	NA	NA	-26.7	0.110909	NA	NA	-7.4	1	NA	NA	31.8	0.0138123	6.4137	4.08406	7.59087	4.32469
THAP9-AS1	MATS_only	ENSG00000251022	NA	58037	chr4	-	83816844	83816927	83821229	83821376	83814638	83816000	-7.3	19.1	83	147	1362	4302	844	AAGGTATGG	9.26	TTGAATGTTTTTCGTTTTAGGAA	11.48	AAGGTAAGG	10.51	gttataacatgtctgaacaggat	6.78	none	AGAAGTTGAAGATTTATATAATAAGGTATGGGACT	19.3894380875,18.5577420863464,18.7609587101565	14.1784335786988,13.5702598680007,13.7188610492097	14.1713330516476,13.5634639129504,13.7119906750282	9.92516797751107,9.4994350356681,9.6034586343942	NA	NA	18.2	0.101096	NA	NA	-7.3	0.766717	NA	NA	19.1	0.0236302	18.9027	13.8225	13.8156	9.67602
C12orf4	MATS_only	ENSG00000047621	NA	39899	chr12	-	4645182	4645377	4647574	4647674	4643322	4643468	-7.2	-18.5	195	100	146	2197	1714	AAGGTGAGG	9.16	CTTTTTTGTTAGTTCTGTAGAAA	2.48	GAGGTGAGC	8.7	GTTTGATGTCCCTGTAACAGACT	5.84	none	AGTTTACCGTGCTTTATAGAAAAAGGTGAGGACTG	2.55751	2.36097	2.90181	1.80677	NA	NA	NA	NA	NA	NA	-7.2	0.26498	NA	NA	-18.5	0.0212693	2.55751	2.36097	2.90181	1.80677
CNTRL	MATS_only	ENSG00000119397	NA	22126	chr9	+	123920017	123920158	123919747	123919878	123921132	123921297	-7.1	-42.6	141	131	165	139	974	AGAGTAAGT	9.35	AATAAAGCAATGTGCTTTAGATC	1.74	AAGGTAGGT	10.29	TTCCCTTTTCTTTAATACAGGTG	10.33	none	AGAAGAAGGAAAAACTGACAGAAGAGTAAGTAAGG	20.9422	13.0995	17.7502	11.5443	NA	NA	3.3	0.763385	NA	NA	-7.1	0.0591659	NA	NA	-42.6	0.00644874	20.9422	13.0995	17.7502	11.5443
PIGX	MATS_only	ENSG00000163964	NA	29220	chr3	+	196453525	196453642	196449285	196449427	196454793	196454908	-7	-14.7	117	142	115	4098	1151	taggttagt	5.5	gtgaacatttcccttgtcaggag	6.32	GAGGTACAG	6.62	TTTATTTTCTTTTTGAACAGGCA	9.34	none	caagaacaactggtaaatgttataggttagtacat	6.09519595274434,5.98878128043649	5.9112216228968,5.8080189175504	5.13299628869875,5.04338044660701	6.21835509952509,6.10979021902901	NA	NA	6	0.197173	NA	NA	-7	0.146859	NA	NA	-14.7	0.00579992	6.04199	5.85962	5.08819	6.16407
N6AMT1	MATS_only	ENSG00000156239	NA	28456	chr21	-	30252191	30252275	30254481	30254572	30250513	30250655	-6.9	56.3	84	91	142	2206	1536	GAGGTAAAA	7.3	CTGTTGTTGAATACATTTAGGTC	6.16	TTGGTAAGA	8.85	TTCTTTCTAATTGTTCACAGGTA	9.57	none	CTATGTAGTGACTCCACCTCAAGAGGTAAAACATA	1.15042510614754,1.13056165107737	0.866288097422923,0.851330605093319	1.3327738695201,1.30976194659313	0.870044009389928,0.855021666781756	NA	NA	-14	0.571657	NA	NA	-6.9	0.636223	NA	NA	56.3	0.0454009	1.14049	0.858809	1.32127	0.862533
GPR137	MATS_only	ENSG00000173264	NA	35190	chr11	+	64055192	64055418	64054436	64054486	64055811	64055940	-6.8	-31.2	226	50	129	706	393	AAGGTAGGG	8.76	TGACTGTGCTGTGGCTGCAGGCT	6.69	CTTGTAAGT	8	CAGCCCCTGCCTTCCCACAGGCG	9.55	upstream	CACTAGCATCTACCTGGAGGCCAAGGTAGGGCTGC	23.7283274360424,17.4692708048841,16.2742462994168,16.6991006708513,15.3710682325382	20.5123474442143,14.667678669035,13.7616230047023,14.0210227111159,12.9978889531324	25.8690768666371,19.5838927172831,18.7217138119792,18.7204949574443,17.6827077051364	24.2723443528528,17.2451125506581,16.3844364744807,16.4848249122733,15.4751431413419	NA	NA	1.8	0.929212	NA	NA	-6.8	0.0729429	NA	NA	-31.2	0.0301923	17.9084	15.1921	20.1156	17.9724
ZNF550	MATS_only	ENSG00000105132	NA	54758	chr19	-	58055018	58055951	58057824	58059361	58053207	58054611	-6.8	-20.1	933	1537	1404	1873	407	GAGGTAAAA	7.3	CTCTGTTTTTGTTTTTTCAGGAC	12.03	CAGGTATCT	7.33	AGTAAATTTTATAATTTCAGAAA	4.26	none	gcgtgagccaccgtgcccggcAGAGGTAAAACGTT	4.31706	4.95797	8.47282	7.58507	NA	NA	9.9	0.229509	NA	NA	-6.8	0.43669	NA	NA	-20.1	0.0123714	4.31706	4.95797	8.47282	7.58507
TCOF1	MATS_only	ENSG00000070814	NA	18183	chr5	+	149771106	149771358	149769449	149769586	149771519	149774479	-6.6	-38.7	252	137	2960	1520	161	tctgtaaga	4.08	CTACCTCTTGCCACCCACAGGTG	10.56	CAGGTACCT	8.16	TTCTCCTTTCACCGAATTAGGTT	7.93	none	tccctcggcctcagtggcctaatctgtaagaagga	16.3266806648174,16.6902236043951,17.1019043510605,16.7002739196928,17.0913649687571	18.6604362048731,19.0759444132464,19.5464713052483,19.0874313328047,19.5344254108532	13.8138082126621,14.1213975229139,14.4697156529755,14.129900973851,14.460798408325	16.2434604440319,16.605150335564,17.0147326665543,16.6151494224783,17.0042470055026	NA	NA	16.6	0.523395	NA	NA	-6.6	0.0616604	NA	NA	-38.7	0.0454226	16.7821	19.1809	14.1991	16.6965
RAD51C	both	ENSG00000108384	6384	47697	chr17	+	56783238	56783383	56780556	56780690	56787219	56787351	-6.1	-7.4	145	134	132	2548	3836	caggcaagt	3.1	tatccattccatccacacagccc	7.92	AAGGTATGA	9.11	ATTATCTCTTCTGTATTTAGGTT	11.1	none	tccagctgtgaacgtttgaaatcaggcaagttata	13.4488	13.5871	6.8599	8.95609	5.44667	0.000466349	19.3	0.0541194	-6.1	0.043027	-6.6	0.360336	-7.4	0.0739578	-26.5	0.0294733	13.4488	13.5871	6.8599	8.95609
TMEM175	MATS_only	ENSG00000127419	NA	40852	chr4	+	941496	941680	926248	926328	944208	944306	-6.6	-25.1	184	80	98	15168	2528	ATGGTCTGT	2.86	AGACCTGCCTTTCCTCCCAGGCT	8.09	CAGGTAGTT	6.3	GCAGTGCTCTTGTATTCCAGCAG	5.58	none	GCTGTCCATCATCGCCACCGTCATGGTCTGTACGG	9.95225	14.9452	15.1279	19.5537	NA	NA	6.8	0.538925	NA	NA	-6.6	0.0308217	NA	NA	-25.1	0.0372353	9.95225	14.9452	15.1279	19.5537
PTAR1	MATS_only	ENSG00000188647	NA	62923	chr9	-	72365696	72365866	72374768	72374858	72356707	72356774	-6.6	-24	170	90	67	8902	8922	ATGGTAAGT	11.01	TTTATGTTTTACATATTAAGAGA	3.55	CATGTGAGT	7.83	ATGACTTCTCTTTATTTTAGAAT	10.34	none	AGAAAGCAATGGCTGAACAGAGATGGTAAGTATGA	23.6296	17.7695	14.697	9.97803	NA	NA	4.3	0.744393	NA	NA	-6.6	0.117146	NA	NA	-24	0.0498372	23.6296	17.7695	14.697	9.97803
TSTD1	MATS_only	ENSG00000215845	NA	53330	chr1	-	161008340	161008463	161008669	161008780	161007702	161007865	-6.4	-22.4	123	111	163	206	475	CGGGTATAG	4.4	CTGTCGCGCCCCTTCCTCAGCGC	7.88	GAGGTACCT	7.63	TACCCTCTCCACTCCTCCAGTGT	8.13	none	ATCCCAGGGGCGCTCAACATCCCGGGTATAGGGTG	30.4292205574869,38.5130091721109	28.1698335145633,35.6533961976978	39.5325604233605,50.0347309030006	36.5240813221433,46.2270230124751	NA	NA	14.5	0.00556548	NA	NA	-6.4	0.537679	NA	NA	-22.4	0.00200952	34.4711	31.9116	44.7836	41.3756
ARPP21	both	ENSG00000172995	2631	29467	chr3	+	35779705	35779810	35778669	35778854	35780808	35781069	-13.1	-28.7	105	185	261	851	998	ATGGTACTG	4.16	CAATTTTTTCTTTCCTCCAGTCT	8.78	CAGGTAGGG	9.46	TTTATTTCCATGACTTGCAGAGA	7.26	none	GTCTCCAACGCAGCACTTTCCCATGGTACTGTATT	59.5161	86.1501	27.6568	34.013	-6.47333	0.201372	3.3	0.911252	-13.1	0.175844	-6.3	0.231441	-28.7	0.163372	-19.9	0.00788275	59.5161	86.1501	27.6568	34.013
GPR137	MATS_only	ENSG00000173264	NA	35183	chr11	+	64055536	64055686	64054436	64054486	64055811	64055940	-6.2	-30.2	150	50	129	1050	125	CAGGTGGGC	8.07	TCTGTTGTTACCTGTGCCAGGGG	5.32	CTTGTAAGT	8	CAGCCCCTGCCTTCCCACAGGCG	9.55	none	CGACTGGTACAATGTGTCTGACCAGGTGGGCATAC	23.7283274360424,17.4692708048841,16.2742462994168,16.6991006708513,15.3710682325382	20.5123474442143,14.667678669035,13.7616230047023,14.0210227111159,12.9978889531324	25.8690768666371,19.5838927172831,18.7217138119792,18.7204949574443,17.6827077051364	24.2723443528528,17.2451125506581,16.3844364744807,16.4848249122733,15.4751431413419	NA	NA	1.7	0.595785	NA	NA	-6.2	0.0777369	NA	NA	-30.2	0.0223543	17.9084	15.1921	20.1156	17.9724
RCSD1	MATS_only	ENSG00000198771	NA	1850	chr1	+	167602885	167603043	167599502	167599666	167607626	167607679	-6.1	-24	158	164	53	3219	4583	CAGGTGAGA	9.22	GCTTTTTCTAATTCATGCAGAGG	6.09	GAGGTAAAG	8.27	agtcatattatgtcttctaggaa	6.86	none	TTCATGGAGTGAGCAAGGGAACCAGGTGAGAAAGC	39.2631	48.2951	75.3543	79.4096	NA	NA	9.9	0.447935	NA	NA	-6.1	0.401857	NA	NA	-24	0.040651	39.2631	48.2951	75.3543	79.4096
AP2A2	MATS_only	ENSG00000183020	NA	32916	chr11	+	1000431	1000598	994071	994245	1003721	1003804	-6.1	-23.1	167	174	83	6186	3123	CAGGTAGTC	5.3	TCTCCTTCCTTCTCTTCCAGTCT	11.44	GTGGTGGGT	4.29	TACTGTCCCTTTTCCCCTAGGTT	11.37	none	CTGGCTCCGAAGACAACTTTGCCAGGTAGTCAGGT	7.67892288759366,7.67397512800114	7.96920463414513,7.96406983734477	13.3978256589985,13.3891930393728	12.1230751985027,12.1152639387098	NA	NA	9	0.096034	NA	NA	-6.1	0.330084	NA	NA	-23.1	0.000837259	7.67645	7.96664	13.3935	12.1192
MYB	both	ENSG00000118513	5589	33675	chr6	+	135517863	135518046	135516885	135517140	135518098	135518461	-14	-2.4	183	255	363	723	52	CAGGTGATG	5.99	TTGCTTTCCATTGCATGCAGATG	7.81	TCTGTAAGT	7.96	TGCCTCCCACATTGTTTCAGGAT	9.54	none	CATCTCTCTCTCAGTGCTGTTTCAGGTGATGATGG	57.2844036401561,63.7301986051101,57.4249213923396,63.576353828755,58.0418833577118,65.6361484699358,65.7590626056473	32.4819339895118,36.1368884493117,32.5616116689628,36.0496539569778,32.9114471662326,37.2176178234967,37.2873137370239	53.2945756181079,59.2914244172416,53.4253063841376,59.1482948471336,53.9992972791738,61.0646258951404,61.1789791271538	37.0098810571639,41.1743322831968,37.1006657204276,41.0749373953677,37.4992679141181,42.4057141832551,42.4851256330364	3.16	0.563784	-18.4	1	-14	0.0352109	-5.9	1	-2.4	0.209828	-37.3	0.01033	61.6361	34.9495	57.3432	39.8214
MAP3K7	both	ENSG00000135341	2495	2202	chr6	-	91254270	91254351	91256976	91257106	91246055	91246120	-20.2	-7.4	81	130	65	2625	8150	CAGGTATCA	7.33	GTATATATGTGTTTTTGCAGCCT	7.97	CAGGTAAAA	8.59	TTTTTTTCTTCTTTTTAAAGGCA	9.76	none	GATGTCCCTGAGATCGTCATATCAGGTATCATAGA	20.3663168525436,19.792916899448,19.9403669690121,19.5550212636374	15.8790508966397,15.431986898507,15.5484762983551,15.2465062867461	19.538608906287,18.9885125137221,19.1590184648958,18.7602851998553	14.3519776011207,13.947907324551,14.0618463744436,13.7802642076694	-20.1067	5.68e-09	-25.8	0.000253748	-20.2	0.0157107	-5.9	0.594938	-7.4	0.0788968	0.4	0.896112	19.9137	15.5265	19.1116	14.0355
SYNE1	both	ENSG00000131018	2838	21482	chr6	-	152451854	152451913	152453256	152453349	152442821	152443811	-0.7	10.9	59	93	990	1343	8043	CAGGTACCT	8.16	CCCCTGTTCATTGCAAACAGCCA	6.03	ACGGTAACT	7.53	TATGTCCATTCTTCTCTCAGGTC	11.12	none	CCTCTGTCAGCAGTCCACATAGCAGGTACCTCCTT	0.636191559847475,0.62910697025569	0.605299599437441,0.598559020792992	2.28605885544625,2.26060144639576	1.40884791769902,1.39315907502319	-15.7933	1.66e-06	-23.7	0.0620136	-0.7	0.873519	-5.9	0.300266	10.9	0.0305397	11.2	0.772186	0.632649	0.601929	2.27333	1.401
CPT1B	MATS_only	ENSG00000205560	NA	53123	chr22	-	51012236	51012350	51012763	51012848	51011948	51012144	-5.7	29.9	114	85	196	413	92	AGGGTCTGC	1.02	ttctgtgaaatactttataggat	7	CAGGTAACT	8.63	GCCCGTGGCCTGTATCACAGATG	6.24	none	CCAGGCAGAGGCCGAGCAAAACAGGGTCTGCAGGG	13.4907522824839,14.0245213797738,13.1591518639392,12.3228412123575,16.6827407779127,12.715673510967,12.004601061369,14.8359524485256	11.5889756094192,12.047499857736,11.352702338416,10.585703692312,15.2484793395401,11.0086247126003,10.3566448620922,12.7445443714581	20.2788477550582,21.0811916150334,19.9224985625513,18.5232828846476,23.1808738001744,19.2275153746686,18.1745487750252,22.3009076666213	17.8467992730856,18.5529177858299,17.5566378238201,16.3017798404463,21.8131747256361,16.9813478961201,16.016262691782,19.6263529141853	NA	NA	-6.7	0.229806	NA	NA	-5.7	0.586731	NA	NA	29.9	0.0031976	13.6545	11.8666	20.3362	18.0869
SHMT1	MATS_only	ENSG00000176974	NA	44396	chr17	-	18238872	18238989	18243356	18243569	18233868	18233985	-5.6	13.2	117	213	117	4367	4887	CTGGTAAAA	4.78	TGATGTTTTTCTTCCTCCAGGAG	10.92	AAGGTGAGC	9.6	ATGTCCAACTTTGTTTCCAGGTG	9.9	none	GGTCCCCACAACCACGCCATTGCTGGTAAAACATC	11.7277229903007,11.1830054079802	14.8967603615336,14.2048504916251	7.55507016616297,7.20415980116056	10.9250517062645,10.4176157993042	NA	NA	-6.9	0.180545	NA	NA	-5.6	0.559573	NA	NA	13.2	0.0070188	11.4554	14.5508	7.37961	10.6713
NIPA2	MATS_only	ENSG00000140157	NA	6426	chr15	-	23033277	23033413	23034120	23034424	23021197	23021429	-5.5	41.2	136	304	232	707	11848	CATGTAAGT	8.31	CTGTGTTTTCTTCTTTCTAGGCT	11.58	CAGGCAAGC	2.13	TTTCATTTTTTATTGTTTAGGTT	10.36	none	AAGAGAGACCATATTAAACTTACATGTAAGTTAAA	15.1183838949475,17.0394232747917,16.1643975408156,17.8980663271136,17.557321577399,16.7944475408091	12.6891962685025,14.3015673988924,13.567138814755,15.0222456334978,14.7362509771487,14.0959538100905	14.4271332164042,16.2603378260737,15.4253204776868,17.0797215503703,16.7545565108342,16.0265630010982	11.2280869497194,12.6548001050808,12.0049379840635,13.2924951733655,13.0394316380008,12.4728620844007	NA	NA	0.9	0.813431	NA	NA	-5.5	0.913505	NA	NA	41.2	0.0374794	16.762	14.0687	15.9956	12.4488
DCUN1D4	both	ENSG00000109184	6842	21467	chr4	+	52775085	52775141	52765435	52765544	52777235	52777340	-12.9	-7.4	56	109	105	9541	2094	GGAGTAAGT	8.57	ATCTTTCTCTTATTTGCTAGGCC	8.41	CGGGTGAGT	9.89	TGTTTTTGTTTGTTAAACAGGAA	9.27	none	TGGCTGGCACCCTTGCAGAGCAGGAGTAAGTGAGT	6.57223374864621,6.41043197992222	5.0542389094823,4.92980864324651	5.01700850898411,4.89349481767266	4.02281269407335,3.92377510137049	0.653333	0.90071	52	0.395109	-12.9	0.0448043	-5.4	0.416707	-7.4	0.168195	-23.7	0.938978	6.49133	4.99202	4.95525	3.97329
CD1E	MATS_only	ENSG00000158488	NA	39489	chr1	+	158325089	158325359	158324166	158324463	158325616	158325791	-5.4	-14.2	270	297	175	626	257	AAGGTGAGC	9.6	TCTTCCCTGTCCACTCTCAGACC	9.39	AATGTAAGT	8.62	TTCTATCTTCTTCTTCCTAGTGA	7.72	none	GGGGAGTCAGAACTGAAACGGAAAGGTGAGCCCAA	213.930299057576,196.288754276872,189.87470560276,240.054229865944,206.226128580033,218.182916819074,273.256751285853,186.645849012444	192.873554774973,176.968433020058,171.185706712819,216.426157757822,185.927690850405,196.707595620859,246.36061941174,168.27466021227	134.378639827683,123.297241809106,119.268307429952,150.788182115267,129.539325554139,137.049888327847,171.644085589025,117.240126481686	84.8707703980027,77.8719885370645,75.3273968885684,95.2346980103954,81.8143595642541,86.5578757178967,108.406855411557,74.0464397378889	NA	NA	1.2	0.969748	NA	NA	-5.4	0.175522	NA	NA	-14.2	0.0311749	215.557	194.341	135.401	85.5163
N4BP2L2	MATS_only	ENSG00000244754	NA	35015	chr13	-	33112754	33112821	33112914	33112929	33110563	33111164	-5.4	24.6	67	15	601	93	1590	AAGGTGAGT	10.47	CTTTTCTTTCACCTTCACAGAGG	9.93	GAGGTGAGG	8.41	ATGATTTATTTATTTCTCAGATG	8.46	none	GGTCAATGCGTAGGGGTAGAGTAAGGTGAGTAGAC	34.6944841954374,25.9350375588778	25.7955954884883,19.5193637318678	34.813320002489,25.9267442006154	21.7585467623135,16.3894632145072	NA	NA	-22.1	0.0601197	NA	NA	-5.4	0.357282	NA	NA	24.6	0.0295597	30.3148	22.6575	30.37	19.074
WASF1	MATS_only	ENSG00000112290	NA	55753	chr6	-	110481837	110481935	110500641	110500873	110448671	110448832	-5.3	-30.1	98	232	161	18706	33005	AAGGTAAAA	8.38	TTGTTCTCAATTTTAAACAGTGT	7.13	ACGGTGAGC	9.44	TTATTTTTGATTTCCTACAGGTG	12.28	none	CTGCAAAATCGTTAAAATCTTCAAGGTAAAATTAA	7.23965676689985,7.58103895590814,7.4669105667577,7.83059952617317	10.0878772411858,10.5635657615019,10.4045370649001,10.9113082689346	7.97700886082034,8.35316049815983,8.2274082421017,8.62813857300688	9.93813068054638,10.4067579809299,10.250089939577,10.7493385258177	NA	NA	13.4	0.193826	NA	NA	-5.3	0.163738	NA	NA	-30.1	0.00282142	7.52955	10.4918	8.29643	10.3361
C12orf4	MATS_only	ENSG00000047621	NA	39896	chr12	-	4645182	4645385	4647574	4647674	4643210	4643468	-5.1	-13.3	203	100	258	2189	1714	AAGGTGAGG	9.16	ACCTACTGCTTTTTTGTTAGTTC	5.98	GAGGTGAGC	8.7	GTTTGATGTCCCTGTAACAGACT	5.84	none	AGTTTACCGTGCTTTATAGAAAAAGGTGAGGACTG	2.55751	2.36097	2.90181	1.80677	NA	NA	NA	NA	NA	NA	-5.1	0.267493	NA	NA	-13.3	0.0281681	2.55751	2.36097	2.90181	1.80677
EML6	MATS_only	ENSG00000214595	NA	25669	chr2	+	55193858	55194016	55191706	55191869	55194135	55194367	-5	47.6	158	163	232	1989	119	TGGGTTTGG	-2.43	catttctaacacatttctagatg	6.01	CAGGTATGC	9.37	GGCTTCCCTTCTACCTACAGGTG	11.56	none	CTTTGCAGCCTGGAGCTGAGCTTGGGTTTGGAGAA	3.77882	3.16974	2.91686	2.30373	NA	NA	-41.6	0.27371	NA	NA	-5	1	NA	NA	47.6	0.0453367	3.77882	3.16974	2.91686	2.30373
RABEPK	MATS_only	ENSG00000136933	NA	61760	chr9	+	127982817	127982979	127969842	127970000	127990188	127990338	-4.7	24.3	162	158	150	12817	7209	CAAGTATGG	4.99	CTGCATTCTCTCTGGCCCAGAAA	5.97	TGGGTAAGA	8.91	TATTGAATTTACTTTTCTAGACA	7.2	none	ACGAAGCTGCATGTGTTTGACGCAAGTATGGACTG	13.6223248380863,12.2015915727644,10.9949231187011	14.8585737174739,13.308906519946,11.9927308751602	12.9604935173518,11.6087856044992,10.4607423106882	14.5307165737079,13.0152430660206,11.7281090773048	NA	NA	-13.4	0.40367	NA	NA	-4.7	0.503986	NA	NA	24.3	0.0351661	12.2729	13.3867	11.6767	13.0914
IP6K2	MATS_only	ENSG00000068745	NA	22949	chr3	-	48731891	48731958	48732522	48732854	48730885	48731673	-4.5	-65.3	67	332	788	564	218	CAAGTAAGA	7.61	ttttataatgtattttataGGGG	8.26	AAGGTAAGT	11	TCTCTGTTGTTTTTTTCCAGGAC	12.3	none	AGTGGGGGAGTCTTTTGTAAATCAAGTAAGAATCC	55.6864518850197,50.2069668690935,52.9110398435543,47.870060774823	57.9039263885977,57.4684036522143,60.5635668714252,54.7935106822203	54.5263348140353,40.2221492574485,42.3884547238867,38.3499910374655	56.1555659323003,40.6136258717856,42.801015689639,38.7232461948443	NA	NA	48.8	0.00279025	NA	NA	-4.5	0.334609	NA	NA	-65.3	0.000324177	51.6686	57.6824	43.8717	44.5734
ZNF280B	MATS_only	ENSG00000198477	NA	62271	chr22	-	22862127	22862188	22862976	22863472	22848381	22848499	-4.5	-14.9	61	496	118	788	13628	GAGGTAAGA	10.06	TTCTCTCTGGTTACCTCAAGGAT	6.44	CTGGTAAGG	9.68	ttcatttctcacatttttaggct	9.96	none	AAAGTTGCGTTGTAATAAACCTGAGGTAAGAAAAG	2.04734	1.74827	1.52052	1.22392	NA	NA	6	0.148802	NA	NA	-4.5	0.267143	NA	NA	-14.9	0.00275228	2.04734	1.74827	1.52052	1.22392
LEPROT,LEPR	MATS_only	ENSG00000213625	NA	23765	chr1	+	65895613	65895731	65890985	65891061	65897485	65897603	-4.4	-35.4	118	76	118	4552	1754	GTGGTAAGT	10.36	CCCCATTTCATTGCCAAAAGAGT	1.38	TGGGTAAGT	10.24	CTTCTTTTCTTGTCTTTCAGATC	13.16	upstream	TGTTATTCTTGCTCGTGTGGCTGTGGTAAGTTTTA	4.16807698065686,3.36666294384849,5.32648682183734,5.9397090060537,2.56998110362748,2.49656849491222	4.90188928563496,3.97210541723993,6.51692806573272,7.62480154470405,3.99248320313724,3.88489241019154	5.30469704064216,4.26753605105245,6.48716129463388,7.22119262266462,2.9254222619463,2.84841079983855	5.44909520251295,4.37608279979694,7.23299534040593,9.18148587796717,4.08836771606639,3.9846359425885	NA	NA	13.2	0.0475023	NA	NA	-4.4	0.685086	NA	NA	-35.4	0.0183077	3.97791	5.14885	4.8424	5.71878
C17orf62	MATS_only	ENSG00000178927	NA	60451	chr17	-	80407306	80407356	80408575	80408694	80407045	80407168	-4.1	-19.1	50	119	123	1219	138	CAGGTGAGA	9.22	AAAGGGCCTTCCTTACACAGGAA	7.05	TCGGTAGGC	7.75	CTGCCTCTGTCTGTTCCCAGACC	11.82	none	TGACGTGCCCAACCACAGAGACCAGGTGAGACTGG	54.0199143909099,48.0506113245167,47.0582401695287,51.7619261474007,54.8521903950068,48.1114862544042,52.9651322410177,45.1068327833607	65.3072027167808,58.0906328678577,56.8909089341969,62.5774150521084,66.3133801298462,58.1642274196329,64.0320272104559,54.7348178911304	90.2715034872164,80.2963310225809,78.6380011790745,86.4982284663968,91.6623018076742,80.3980577933021,88.5088799881634,75.4674746039132	97.619408595619,86.8322786706708,85.0389643652047,93.5389971504591,99.123414890785,86.9422857804732,95.713311356653,83.2593362450661	NA	NA	-6.7	0.620423	NA	NA	-4.1	0.405238	NA	NA	-19.1	0.0124853	50.2408	60.7638	83.9676	91.0085
LPAR2	MATS_only	ENSG00000064547	NA	59506	chr19	-	19738562	19738778	19738900	19738976	19738205	19738313	-4.1	-10.7	216	76	108	122	249	CTAGCAAGT	1.03	ACCCCCTACCCCTTCCCCAGTCT	7.65	CAGGTGAGG	10.07	GGGTGATGTCTTGCACACAGGTC	6.42	none	GGCACCGCCCCCTCGCAGGGTTCTAGCAAGTGACC	4.38906	4.03433	12.9142	9.08833	NA	NA	5.6	0.204355	NA	NA	-4.1	0.591107	NA	NA	-10.7	0.0467898	4.38906	4.03433	12.9142	9.08833
CHEK2	both	ENSG00000183765	6425	52699	chr22	-	29099492	29099554	29105993	29106047	29095825	29095925	-10.8	-7.2	62	54	100	6439	3567	ATTGTAAGT	8.54	TTTTCTCCCCCTCTTCTTAGCCT	9.43	CATGTAAGT	8.31	GCCTTGCCTTTGTGTTTCAGGAT	11.75	none	AAGATTATTATATTGTTTTGGAATTGTAAGTAGTA	14.7402179556913,14.0500139932881,13.1378590838094	14.4921905393004,13.8136003472018,12.9167938827886	16.0760184860978,15.3232662749619,14.3284492898235	13.4916518601326,12.8599114339585,12.0250203544514	-13.06	2.44e-07	5.6	0.589394	-10.8	0.119929	-4	0.118024	-7.2	0.186386	-43	0.011816	13.976	13.7409	15.2426	12.7922
MTMR12	MATS_only	ENSG00000150712	NA	24882	chr5	-	32233066	32233126	32233878	32233999	32230190	32230453	-3.5	-30	60	121	263	752	2613	ATGGTAAGT	11.01	ATTTAACTGACATTTCCTAGCTC	3.7	AAAGTAAGA	6.91	ATTTGTGTTTTCTCTCAAAGCAT	7.86	none	GTCCACAAAGGAGAGAGCAGTGATGGTAAGTCTAA	6.24969	4.27759	5.98371	4.05079	NA	NA	26.5	0.140352	NA	NA	-3.5	0.431351	NA	NA	-30	0.0402576	6.24969	4.27759	5.98371	4.05079
CPEB4	both	ENSG00000113742	582	8406	chr5	+	173359452	173359503	173337525	173337607	173371969	173372143	-10.1	-13	51	82	174	21845	12466	ATGGTAAGT	11.01	CGGCCTTCTTTTACCTTCAGGTC	11.72	AAGGTAAGT	11	TTCCCTGCTTTCTATTCCAGGTC	13.02	none	TCCGATAGCTCTCTGCTTATTAATGGTAAGTGATA	1.10806	0.909289	1.87486	1.20681	0.12	0.98787	4.4	0.264434	-10.1	0.398473	-3.4	0.624182	-13	0.10657	-36.8	0.0173795	1.10806	0.909289	1.87486	1.20681
FNBP1	MATS_only	ENSG00000187239	NA	5328	chr9	-	132678244	132678259	132686122	132686305	132671168	132671278	-3.2	32.6	15	183	110	7863	6966	CTGGTAAGC	8.69	TCTCCAATTTTTACATGAAGCTT	4.45	GGGGTAAGT	9.65	ATTTATATTTGTGTCTGCAGGGT	9.41	none	TTACATGAAGCTTTCTCTCAAGCTGGTAAGCACAA	94.0693	66.3109	67.5309	56.1762	NA	NA	1.6	0.665992	NA	NA	-3.2	0.496071	NA	NA	32.6	0.00162762	94.0693	66.3109	67.5309	56.1762
SARDH	MATS_only	ENSG00000123453	NA	9884	chr9	-	136555501	136555649	136559379	136559493	136550314	136550408	-3.1	14.2	148	114	94	3730	5093	CAGGTGAGA	9.22	TCCAGGTGCCTCTCTTCCAGGGG	7.68	AAGGTATGG	9.26	GACTTTGCTCTTGCCTGCAGCCG	9.49	none	TGATCAGTATCCAGGGCCCAGCCAGGTGAGAGAGG	5.79285995847423,5.52011351684042	8.44335396856044,8.04581376097942	16.8221215426047,16.048350188944	16.1701652377532,15.4088219529434	NA	NA	-19.6	0.0161555	NA	NA	-3.1	0.421321	NA	NA	14.2	0.0167583	5.65649	8.24458	16.4352	15.7895
SLC20A1	MATS_only	ENSG00000144136	NA	36572	chr2	+	113410465	113410524	113410278	113410375	113414698	113414818	-2.9	-43.3	59	97	120	90	4174	AGTGTACGC	2.68	TACCCCTTTTTGCTTTACAGGGC	10.77	CGTGTAAGT	8.58	TGCACCATTTTATCTCCTAGTGC	7.47	none	CCATTTCAGAAGGCTGCAGGCTAGTGTACGCTGAG	32.4702	25.0756	20.2922	15.4151	NA	NA	36.2	0.00332138	NA	NA	-2.9	0.533238	NA	NA	-43.3	0.00265075	32.4702	25.0756	20.2922	15.4151
PTBP3	MATS_only	ENSG00000119314	NA	60209	chr9	-	115038123	115038293	115060120	115060196	115030328	115030475	-2.9	-10.2	170	76	147	21827	7648	CAGGTATGT	9.8	AAGAATCTTATGTTTTTTAGCTA	4.95	CAGGTGTGT	6.99	CCTTCTTGTGTTTATTGCAGGCT	10.56	none	TTTGATGTTGAAAGGAAAAAGCCAGGTATGTAATA	14.6260459650799,15.0405103897386,15.1047779972856,27.6486585057283,15.4345342910493,15.0574691210726	12.6993449550508,13.1442695815543,13.2004346143271,24.162838331309,13.4886166978555,13.1590902312955	14.4595158430749,14.9628575906526,15.0267933903362,27.5059109746733,15.3548471820862,14.9797287655857	9.10943479365531,9.4371111635616,9.47743563001392,17.3480458495562,9.68433996507265,9.44775185517674	NA	NA	5.7	0.50356	NA	NA	-2.9	0.732377	NA	NA	-10.2	0.0376463	17.152	14.9758	17.0483	10.7507
NEO1	both	ENSG00000067141	2984	1180	chr15	+	73567032	73567065	73566151	73566346	73570471	73570540	-22.3	-18.5	33	195	69	686	3406	AAGGTAAAT	8.88	CCCTGTGCTTGGCCTGTTAGCGG	5.62	AAGGTAATG	8.99	CATGATTTCTTCTCCTTTAGCCT	7.67	none	TCTGATAAAATGCCTAATGATCAAGGTAAATGAGT	3.27412924287822,3.25888569533096,3.33366745684887	2.63596233122529,2.62368993323849,2.68389583587738	3.444796526023,3.4287583932128,3.50743822933934	2.67537554895694,2.66291965263702,2.72402576098878	-8.3	0.0358692	0.9	1	-22.3	0.0323163	-2.8	1	-18.5	0.0432238	-5.3	0.395852	3.28889	2.64785	3.46033	2.68744
MKNK2	MATS_only	ENSG00000099875	NA	231	chr19	-	2046365	2046467	2050799	2050852	2043501	2043581	-2.8	24.4	102	53	80	4332	2784	AAGGTGAGC	9.6	GGGCGTGCCTCCTGGAACAGACA	3.55	AAGGTGAGG	9.16	TGTCCTTTCGCCTGTTTCAGATC	12.56	none	GACAGCTTCTCGGGCAGGTTTGAAGGTGAGCGGGG	46.1624047256266,21.4408210059846	80.9808618816602,37.6127754789851	100.62676248607,46.7376085734508	141.232960059622,65.5977658612459	NA	NA	-16.1	0.184926	NA	NA	-2.8	0.684025	NA	NA	24.4	0.00790707	33.8016	59.2968	73.6822	103.415
DENND1B	both	ENSG00000213047	919	21148	chr1	-	197616184	197616244	197621364	197621445	197614819	197614873	-5	-7.4	60	81	54	5120	1311	CCGGTGAGT	10.9	TTTCTCTCATGTATTATAAGAAC	4.39	GTGGTAAGT	10.36	GATTTATTTGTATTGATTAGCAT	3.31	none	GAAAGATCAGCCTGCTCTAGTACCGGTGAGTTAAA	4.64134438107799,2.49723535534805	4.31033126968987,2.30568159109228	7.56798661981445,4.29892261534857	4.44830445824757,2.64793245059631	-0.586667	0.608417	28.7	0.0174865	-5	0.0594865	-2.7	0.800793	-7.4	0.176861	-31.4	0.0121183	3.56929	3.30801	5.93345	3.54812
CLDND1	MATS_only	ENSG00000080822	NA	33990	chr3	-	98240496	98240562	98241385	98241446	98239976	98240286	-2.7	-30.9	66	61	310	823	210	TGGGTATGT	7.43	AATGTGTATGTCCATTTCAGTGT	8.24	AAGGTCATT	4.32	TTTCTTCAACTTCTAAACAGAGC	7.79	upstream	GACCTCTGTCTCCGTAGCATCCTGGGTATGTGAGC	21.8703647239265,22.381073790282,21.9390777190197,19.6227479558313	17.2695734492795,17.67284645565,17.3238315346228,15.4947798711921	14.7114004131244,15.054935862332,14.7576211505085,13.1995102060751	12.4885212434383,12.7801487999472,12.5277580696071,11.2050762661922	NA	NA	NA	NA	NA	NA	-2.7	1	NA	NA	-30.9	0.0399647	21.4533	16.9403	14.4309	12.2504
XRRA1	MATS_only	ENSG00000166435	NA	13289	chr11	-	74620933	74621057	74632258	74632344	74617884	74618318	-2.7	16.8	124	86	434	11201	2615	ATGGTACAC	3.23	AATCcccctttaccatacagata	7.97	ACAGTAAGT	9.49	CAAGATCTTTGCACTCACAGGGA	5.28	none	cccttcccatgcATCTTCTAATATGGTACACAAAT	7.46152	7.13641	7.55939	6.26363	NA	NA	-27.3	0.0171769	NA	NA	-2.7	0.671298	NA	NA	16.8	0.000580513	7.46152	7.13641	7.55939	6.26363
NAP1L4	MATS_only	ENSG00000205531	NA	53420	chr11	-	3000436	3000467	3013483	3013607	2999513	2999572	-2.4	-59.4	31	124	59	13016	864	CAGGTAAGC	9.88	CAACTCTTTTTAATTTATAGGGG	7.91	GAGGTGCGG	6.79	TAAACATACTGTTGTTTTAGTTT	6.35	none	AAAACATTCAGATGGCAGATCACAGGTAAGCCAAA	66.694	50.1197	51.3904	46.6033	NA	NA	NA	NA	NA	NA	-2.4	1	NA	NA	-59.4	0.0499302	66.694	50.1197	51.3904	46.6033
KAT2A	MATS_only	ENSG00000108773	NA	18931	chr17	-	40269924	40270035	40270314	40270421	40269695	40269832	-2.2	-27.6	111	107	137	279	92	CAGGTGGAT	3.56	ACGTCTCTCTCTCTCCTCAGCTT	11.32	CAGGTATGT	9.8	CTTGCCTGCCTCCCCAATAGGCG	9.07	none	TCTGCAGGGGCCGAGCCTATGCCAGGTGGATACTT	17.562	20.7079	18.1996	23.7849	NA	NA	0.8	0.945033	NA	NA	-2.2	0.366936	NA	NA	-27.6	0.0470035	17.562	20.7079	18.1996	23.7849
PWP2	MATS_only	ENSG00000241945	NA	44707	chr21	+	45547455	45547574	45546780	45546846	45547812	45548031	-2.1	-35.7	119	66	219	609	238	CGTGTACAT	-3.96	atccttctggctgtctctagtga	7.7	CTGGTGAGC	8.05	AGCACTGCTTAATTTCCCAGGGC	6.47	none	CGTCAAGAGAGGAGGACGCATGCGTGTACATATTT	6.50072	9.86136	8.99074	9.5509	NA	NA	35.5	0.0442999	NA	NA	-2.1	0.457902	NA	NA	-35.7	0.0365772	6.50072	9.86136	8.99074	9.5509
RNF216P1	MATS_only	ENSG00000196204	NA	63137	chr7	+	5026197	5026262	5024540	5024706	5028693	5028808	-2.1	-22.6	65	166	115	1491	2431	CAGGTGAGA	9.22	CTTGGGTTTTATGGTGATAGGAC	4.48	AAGGTACTC	7.46	TTCCCTTTCTCAATTTTTAGGCC	11.75	none	AGGATGAGGTACCCAGAGATACCAGGTGAGAAGAG	6.68019690736041,5.88846986648806,6.33982356028622	6.13368658572489,5.40673113852787,5.82115935605792	7.93251937192613,6.992368927846,7.52833694934239	5.62832691949697,4.96126595126029,5.34154907468432	NA	NA	16.8	0.159247	NA	NA	-2.1	0.687078	NA	NA	-22.6	0.0458007	6.30283	5.78719	7.48441	5.31038
DHTKD1	MATS_only	ENSG00000181192	NA	13839	chr10	+	12133511	12133683	12131173	12131254	12136071	12136300	-2	11.3	172	81	229	2257	2388	TTGGTACGT	8.11	CCCCTTGCCTCATGATTTAGGTC	10.02	CAGGTACTT	8.17	CTTGGTCTTCTGTCCTTCAGGGA	10.34	none	TCTTCTTTATACTGCAGTGATATTGGTACGTAACA	7.15094	7.83159	7.8469	7.67486	NA	NA	-18.7	0.0146372	NA	NA	-2	0.491569	NA	NA	11.3	0.0450428	7.15094	7.83159	7.8469	7.67486
MAPK8	MATS_only	ENSG00000107643	NA	11455	chr10	+	49533939	49534008	49514697	49514864	49609654	49609825	-2	58.9	69	167	171	19075	75646	agggtatgt	8.34	gatgtttttctcatttttagact	10.05	CGGGTGAGT	9.89	TGTTTTGTTGCATCTTGCAGCTT	9.01	none	atcatttcatcacatcctgtcaagggtatgtactg	12.6467827368495,12.6915659618383,12.6467827368495,12.6915659618383	11.8037826355877,11.8455807327392,11.8037826355877,11.8455807327392	14.7769436155353,14.8292699031257,14.7769436155353,14.8292699031257	10.8536006480653,10.8920340781221,10.8536006480653,10.8920340781221	NA	NA	-3.6	0.704414	NA	NA	-2	0.518481	NA	NA	58.9	0.00395684	12.6692	11.8247	14.8031	10.8728
TEX10	MATS_only	ENSG00000136891	NA	53010	chr9	-	103070781	103070963	103082546	103082680	103065913	103066124	-1.9	14.2	182	134	211	11583	4657	GAGGTAATT	8.88	TCTCGTTTTTCTCTGCTTAGGTT	10.39	GAGGTAATA	7.96	TTCTGTCTCTGTTATTGTAGGGA	8	none	GGGAAGCAGAACATCTAAGAAAGAGGTAATTATTT	12.3683846167588,12.0304971110858	11.0831739025461,10.7520873893224	9.80796513032657,9.53998585766778	9.08151435239258,8.78963653598764	NA	NA	-14.9	0.336845	NA	NA	-1.9	0.613814	NA	NA	14.2	0.0369685	12.1994	10.9176	9.67398	8.93558
CLDND1	MATS_only	ENSG00000080822	NA	33980	chr3	-	98240496	98240547	98241385	98241509	98239976	98240286	-1.8	-25.4	51	124	310	838	210	TGGGTATGT	7.43	TTCAGTGTTGTCTGTTTTAGTAT	9.26	AAGGTCATT	4.32	TTTCTTCAACTTCTAAACAGAGC	7.79	upstream	GACCTCTGTCTCCGTAGCATCCTGGGTATGTGAGC	21.8703647239265,22.381073790282,21.9390777190197,19.6227479558313	17.2695734492795,17.67284645565,17.3238315346228,15.4947798711921	14.7114004131244,15.054935862332,14.7576211505085,13.1995102060751	12.4885212434383,12.7801487999472,12.5277580696071,11.2050762661922	NA	NA	NA	NA	NA	NA	-1.8	1	NA	NA	-25.4	0.0273355	21.4533	16.9403	14.4309	12.2504
NCOA6	both	ENSG00000198646	1715	37986	chr20	-	33328166	33331145	33334610	33334732	33324493	33324562	-11.7	-27.3	2979	122	69	3465	3604	TAGGTATGT	7.76	ATTTGGGGGGCTTGTTTTAGGTT	6.07	CAGGTGATA	4.58	TTTTTTTTTCCTTGCCTTAGCCC	8.42	within	CATCCAGAACTTCTACCCAGCATAGGTATGTACTT	18.9909953913959,10.9799255427739	14.5929733282074,8.43714388262118	14.2010254378452,8.21053339885612	9.56514244149972,5.53022891371331	NA	NA	-4	0.615719	-11.7	0.0594602	-1.8	0.72948	-27.3	0.0618594	-15.9	0.0413698	14.9855	11.5151	11.2058	7.54769
PDCD10	MATS_only	ENSG00000114209	NA	47711	chr3	-	167443188	167443261	167452593	167452727	167437849	167438061	-1.6	26.1	73	134	212	9332	5127	AAGGTACGT	10.75	TCTGCCTCCCTTTTTCCTAGCTT	8.08	CTGGTAAGG	9.68	CTTTCTTCCTCTTTCACCAGATC	11.76	none	TTTGGCATGAGAAAGCCCTAAAAAGGTACGTAAAC	13.9978773884794,12.4898698237324,15.0893204952737	11.3044803819758,10.0291119378052,12.1855318694034	14.8105867703252,13.2274710416345,15.9700831637888	10.9693009963147,9.76220464386444,11.8287739810695	NA	NA	-8.5	0.628735	NA	NA	-1.6	0.673482	NA	NA	26.1	0.0484582	13.859	11.173	14.6694	10.8534
C6orf89	MATS_only	ENSG00000198663	NA	29945	chr6	+	36862279	36862379	36853768	36853804	36867201	36867409	-1.6	34.6	100	36	208	8475	4822	TTGGTAAGG	8.92	TCCCTTTACTCTATTTGCAGGAA	10.46	CATGTGAGT	7.83	TTTCTCTCCGTCTCTCTCAGGGA	11.47	none	CAGCTCAGAATAGGAAAATAACTTGGTAAGGGAGG	14.3609	12.3248	18.0109	17.1596	NA	NA	-19.8	0.530372	NA	NA	-1.6	0.51216	NA	NA	34.6	0.0309	14.3609	12.3248	18.0109	17.1596
CLDND1	MATS_only	ENSG00000080822	NA	33985	chr3	-	98240496	98240540	98241385	98241450	98239976	98240286	-1.4	-22.4	44	65	310	845	210	TGGGTATGT	7.43	TTGTCTGTTTTAGTATGCAGGTG	3.8	AAGGTCATT	4.32	TTTCTTCAACTTCTAAACAGAGC	7.79	upstream	GACCTCTGTCTCCGTAGCATCCTGGGTATGTGAGC	21.8703647239265,22.381073790282,21.9390777190197,19.6227479558313	17.2695734492795,17.67284645565,17.3238315346228,15.4947798711921	14.7114004131244,15.054935862332,14.7576211505085,13.1995102060751	12.4885212434383,12.7801487999472,12.5277580696071,11.2050762661922	NA	NA	NA	NA	NA	NA	-1.4	1	NA	NA	-22.4	0.022292	21.4533	16.9403	14.4309	12.2504
TMEM39B	MATS_only	ENSG00000121775	NA	56652	chr1	+	32561260	32561363	32560384	32560572	32566042	32566163	-1.3	-18.7	103	188	121	688	4679	GAGGTAGGC	8.99	tgcctgtatttccccattagact	6.27	CCCGTGAGT	8.4	CCATTGAACTGTGCCCCCAGGTG	9.34	none	aggcccctaggacaggtttgCAGAGGTAGGCCCAC	13.1566	12.055	14.6974	13.4003	NA	NA	6.2	0.628517	NA	NA	-1.3	0.571509	NA	NA	-18.7	0.033529	13.1566	12.055	14.6974	13.4003
DNAJC24	MATS_only	ENSG00000170946	NA	35865	chr11	+	31443518	31443679	31436357	31436496	31447833	31449525	-1.3	16.7	161	139	1692	7022	4154	CAAGTAAGC	7.47	TTAATCTCTTTGAATTGCAGGCT	8.63	GTGGTAGGT	7.23	TCATGTTTTATGTTTTACAGAAG	7.81	none	TAAAGGTTGAAAGATTCTTTTTCAAGTAAGCACAT	5.20099	4.77713	4.7989	4.79793	NA	NA	-2.3	0.269917	NA	NA	-1.3	0.929875	NA	NA	16.7	0.0188073	5.20099	4.77713	4.7989	4.79793
KCTD17	MATS_only	ENSG00000100379	NA	24494	chr22	+	37457143	37457215	37455352	37455478	37457578	37457669	-1.2	-26.6	72	126	91	1665	363	gaggtcctg	-2.13	CTCTCACTTTCTCTTTGCAGCCC	11.97	AAGGTGAGC	9.6	CTCACGTTTCCTCCTTGCAGGTT	12.27	none	cctcctcctccgcttcccgctggaggtcctgcctc	9.69997	11.7318	9.19465	16.273	NA	NA	21.3	0.364123	NA	NA	-1.2	0.847753	NA	NA	-26.6	0.0121281	9.69997	11.7318	9.19465	16.273
CHD1L	both	ENSG00000131778	5068	18122	chr1	+	146724277	146724390	146714350	146714480	146726524	146726631	3.2	-12.3	113	130	107	9797	2134	CAGGTGTGT	6.99	GCTGTATTTTTTGTTTCTAGGGA	9.09	CAGGTGAGC	9.6	TTTCTTTTTCTGTGTTCCAGACT	10.61	none	GATGGGCCTGGGGAAGACCTGCCAGGTGTGTTACT	19.9558958153985,18.7309984279238	18.6071596626184,17.4650480044948	25.3446707828231,23.7890091720659	20.0523500074038,18.8215322398625	NA	NA	1	0.744082	3.2	0.337895	-1.1	0.633354	-12.3	0.183863	-29	0.0140371	19.3434	18.0361	24.5668	19.4369
TTLL4	MATS_only	ENSG00000135912	NA	43302	chr2	+	219591991	219592070	219575597	219575760	219602301	219603886	-1	42.6	79	163	1585	16231	10231	caggtaagc	9.88	tctcctttgtgtattttcagata	11.04	TAGGTGAGT	8.83	ATCATTTCTCTCCACTTCAGACT	8.28	none	tgagagcctctagtaaatttttcaggtaagcaaat	6.32205	6.13356	5.52366	4.56283	NA	NA	-36.2	0.189704	NA	NA	-1	0.488793	NA	NA	42.6	0.00823926	6.32205	6.13356	5.52366	4.56283
ORC4	MATS_only	ENSG00000115947	NA	55884	chr2	-	148739496	148739650	148778201	148778463	148733470	148733544	-0.9	12.5	154	262	74	38551	5952	ATGGTTTGC	1.51	GTTATTTAATTTTCAATTAGGAA	6.03	CTGGTAAAT	6.06	TTATGCCAATTTTTTTAAAGGAT	7.7	none	TAGAGAAGAAAACAGCATTACCATGGTTTGCTTTC	4.04421507375769,4.44285956900651,4.04894977725525,4.11535989458813	3.15346517056556,3.46811320721858,3.15675836110621,3.20894014171898	4.16372600968238,4.52271214913681,4.1680742242233,4.23697323702893	2.85544462312304,3.11287665589899,2.85842658826728,2.90567689128838	NA	NA	-1.5	1	NA	NA	-0.9	0.51603	NA	NA	12.5	0.0340989	4.16285	3.24682	4.27287	2.93311
ZNF8	MATS_only	ENSG00000142396	NA	52319	chr19	+	58823562	58823828	58817453	58817582	58826113	58826568	-0.8	-27.1	266	129	455	5980	2285	gcggtatgt	9.45	accgtgtgggtgccctccaggtg	9.34	aaggtcagt	8.68	ctctgtttttttgctcatagtct	7.91	none	catgctagctgtagtgtcctgtgcggtatgtttcc	0.0027561	0	0.00717005	0.00463452	NA	NA	13.1	0.258242	NA	NA	-0.8	0.250898	NA	NA	-27.1	0.00104204	0.0027561	0	0.00717005	0.00463452
TMEM175	MATS_only	ENSG00000127419	NA	40864	chr4	+	941496	941942	926262	926328	944208	944279	-0.7	-25.2	446	66	71	15168	2266	CAGGTAACG	10.52	AGACCTGCCTTTCCTCCCAGGCT	8.09	CAGGTAGTT	6.3	GCAGTGCTCTTGTATTCCAGCAG	5.58	none	CCACACGGAGATCTCCCCAGAACAGGTAACGGGGC	9.95225	14.9452	15.1279	19.5537	NA	NA	7.2	0.580155	NA	NA	-0.7	0.231281	NA	NA	-25.2	0.0249764	9.95225	14.9452	15.1279	19.5537
RAP1B	MATS_only	ENSG00000127314	NA	54352	chr12	+	69018450	69018653	69004717	69004832	69042478	69042561	-0.6	-20.7	203	115	83	13618	23825	GAAGTAAGT	9.82	actaaaaatatgaaaattagcca	-3.29	AGAGTGAGT	7.36	TTTTTTTTTCCTTTAATAAGGTA	8.38	none	CCATTTGATAGTGACAAGGATTGAAGTAAGTATCT	35.091192759945,34.9352319032341,32.8888166453041,33.9299014887526,33.0270049505365,35.3542451794349	30.0061622766621,29.8728015554325,28.1229303346122,29.0131525898085,28.2410939074467,30.231096026862	57.4302191880237,57.1749737694103,53.8258121260139,55.5296507832402,54.0519710004929,57.8607305762398	57.9851987495266,57.7274867550843,54.3459603342844,56.0662641146502,54.5743047054368,58.4198704043207	NA	NA	7.1	0.54247	NA	NA	-0.6	0.185521	NA	NA	-20.7	0.00503189	34.2044	29.2479	55.9789	56.5198
LONP2	MATS_only	ENSG00000102910	NA	48684	chr16	+	48290520	48290652	48286041	48286276	48292528	48292651	-0.5	-37.1	132	235	123	4244	1876	CAGGTACAG	8.68	ACTTTTTTTCCCCCTTCTAGTTG	11.22	CAAGTAAGT	10.08	ATTGACTCACATTTCCTTAGATT	6.63	none	AACAAGCAACAAAGAGAAACTCCAGGTACAGTGTT	9.77402	8.27093	9.81435	7.50574	NA	NA	7.3	0.598492	NA	NA	-0.5	0.409002	NA	NA	-37.1	0.0458821	9.77402	8.27093	9.81435	7.50574
C12orf23	MATS_only	ENSG00000151135	NA	64693	chr12	+	107350859	107350927	107349621	107349843	107360888	107360958	-0.5	-32.3	68	222	70	1016	9961	CAGGTAAAC	7.82	TGCTGTATGCTATTGTTTAGCCT	3.61	GCGGTGAGT	10.49	TTTGTATGTTTTTTTTTTAGGAG	10.5	none	AGGAATATCGATACAACACCAACAGGTAAACGCGC	9.62288	9.35675	10.9195	9.15221	NA	NA	11.9	0.304297	NA	NA	-0.5	0.371158	NA	NA	-32.3	0.00607644	9.62288	9.35675	10.9195	9.15221
PAPOLA	MATS_only	ENSG00000090060	NA	61159	chr14	+	97026985	97027048	97022511	97022750	97029155	97029230	-0.5	-14	63	239	75	4235	2107	AAGGTATAC	7.64	GCTTTTTTTTTTAAAAACAGGAT	7.79	GAGGTATAT	7.3	CCATCCTCTTTGTCTCACAGGAA	10.88	none	TGGACATGATAAAACAGAAGCAAAGGTATACTAAT	14.8339	15.1837	12.4466	10.3858	NA	NA	7.6	0.697646	NA	NA	-0.5	0.489287	NA	NA	-14	0.00248836	14.8339	15.1837	12.4466	10.3858
ALKBH6	MATS_only	ENSG00000239382	NA	55441	chr19	-	36503902	36503991	36504245	36504324	36501795	36501947	-0.4	-26.4	89	79	152	254	1955	CTGGTCTGT	3.05	AGGGGGTCTTTCTATCCTAGGCA	7.27	CAGGTTGTC	-1.28	GACCCCATTGCCTTCCCCAGGTG	8.54	none	GACAGGTGACCTCAGTGCCCTACTGGTCTGTTTTC	20.5606279691196,21.4154941639977	21.3779012399966,22.2667478800391	27.3928099380705,28.5317434003144	30.2031181844231,31.4588981515792	NA	NA	-0.8	0.779542	NA	NA	-0.4	0.931357	NA	NA	-26.4	0.0458519	20.9881	21.8223	27.9623	30.831
RAP1B	MATS_only	ENSG00000127314	NA	54333	chr12	+	69018454	69018653	69004687	69004832	69042478	69042561	-0.4	-20.9	199	145	83	13622	23825	GAAGTAAGT	9.82	aaaatatgaaaattagccaggca	-4.81	AGAGTGAGT	7.36	TTTTTTTTTCCTTTAATAAGGTA	8.38	none	CCATTTGATAGTGACAAGGATTGAAGTAAGTATCT	35.091192759945,34.9352319032341,32.8888166453041,33.9299014887526,33.0270049505365,35.3542451794349	30.0061622766621,29.8728015554325,28.1229303346122,29.0131525898085,28.2410939074467,30.231096026862	57.4302191880237,57.1749737694103,53.8258121260139,55.5296507832402,54.0519710004929,57.8607305762398	57.9851987495266,57.7274867550843,54.3459603342844,56.0662641146502,54.5743047054368,58.4198704043207	NA	NA	7.3	0.548483	NA	NA	-0.4	0.206102	NA	NA	-20.9	0.00404199	34.2044	29.2479	55.9789	56.5198
LAMP2	MATS_only	ENSG00000005893	NA	42767	chrX	-	119572930	119573148	119575584	119575749	119565102	119565317	-0.4	24.3	218	165	215	2436	7613	AAGGTATAT	7.84	ACACTTTTTCTCACCTACAGCCC	10.58	CAGGTAAGA	10.77	TGTCCTTTCTCCACATCTAGCTC	8.95	none	AACATGCAATACTGGTCAACTTAAGGTATATTTAG	8.22905482333042,11.3861604454488,14.4490973283851	5.56565487447434,7.70181375170111,9.77253046722734	6.18465971363288,8.43034503621246,10.8594184950462	4.77153374082328,6.93268712543714,8.37816212274621	NA	NA	-21.4	0.02692	NA	NA	-0.4	0.620281	NA	NA	24.3	0.016188	11.3548	7.68	8.49147	6.69413
ALKBH6	MATS_only	ENSG00000239382	NA	55440	chr19	-	36503922	36503991	36504245	36504324	36501795	36501947	-0.3	-22.8	69	79	152	254	1975	CAGGTGACC	6.54	AGGGGGTCTTTCTATCCTAGGCA	7.27	CAGGTTGTC	-1.28	GACCCCATTGCCTTCCCCAGGTG	8.54	none	AGAGGAGGAGTATTTGCTTCGACAGGTGACCTCAG	20.5606279691196,21.4154941639977	21.3779012399966,22.2667478800391	27.3928099380705,28.5317434003144	30.2031181844231,31.4588981515792	NA	NA	-0.6	0.863357	NA	NA	-0.3	0.956031	NA	NA	-22.8	0.0258837	20.9881	21.8223	27.9623	30.831
KCTD17	MATS_only	ENSG00000100379	NA	24493	chr22	+	37457143	37457215	37456862	37456962	37457578	37457669	0.1	-51	72	100	91	181	363	gaggtcctg	-2.13	CTCTCACTTTCTCTTTGCAGCCC	11.97	AAGGTGCAG	3.97	CTCACGTTTCCTCCTTGCAGGTT	12.27	none	cctcctcctccgcttcccgctggaggtcctgcctc	9.69997	11.7318	9.19465	16.273	NA	NA	27.8	0.412922	NA	NA	0.1	1	NA	NA	-51	0.0178511	9.69997	11.7318	9.19465	16.273
ZEB1	MATS_only	ENSG00000148516	NA	4619	chr10	+	31661946	31662102	31608144	31608221	31676052	31676195	0.1	-37.9	156	77	143	53725	13950	ATGGTAAGA	9.48	ATAAAGTTTGGGTAATTTAGTTT	-0.72	ACGGTGAGT	11.45	ACTCTTCTCTCCTCCCTTAGGAC	12.11	upstream_and_within	AGTGACTATCAAAAGGAAGTCAATGGTAAGAGTTT	16.6182276842249,15.6395817020982,16.4517123767677,16.443474163259,17.0231300694807,15.6470707276539	13.3557543720836,12.136601973497,13.2219291779745,13.2153082820417,13.6811667388477,12.1424135945537	12.6199725706632,11.831211735651,12.4935199396947,12.4872637955086,12.9274576462574,11.8368771203608	9.03214085161692,8.49459093746749,8.94163843827407,8.93716090275165,9.25220856547177,8.49865857877833	NA	NA	6.4	0.245206	NA	NA	0.1	0.866548	NA	NA	-37.9	0.00639211	16.3039	12.9589	12.3661	8.8594
ZNF8	MATS_only	ENSG00000142396	NA	52318	chr19	+	58823531	58823828	58817453	58817582	58826113	58827023	0.1	-21.6	297	129	910	5949	2285	gcggtatgt	9.45	gtatgcttgtgtttttacaggag	9.43	aaggtcagt	8.68	ctctgtttttttgctcatagtct	7.91	none	catgctagctgtagtgtcctgtgcggtatgtttcc	0.0027561	0	0.00717005	0.00463452	NA	NA	10.5	0.322695	NA	NA	0.1	0.2905	NA	NA	-21.6	0.00187282	0.0027561	0	0.00717005	0.00463452
KIAA0748	MATS_only	ENSG00000135426	NA	30834	chr12	-	55375557	55375729	55378368	55378515	55368183	55368391	0.1	21.7	172	147	208	2639	7166	cttgtgagt	7.15	CTCTCAGTCTCAACTCACAGGCA	7.29	CAGGTAAGC	9.88	CACTGTTTTTCAACTCTTAGGAC	8.33	none	agcatgcatctggaactcagaacttgtgagtttgg	16.9107515470319,17.7030958540978	14.4211201114045,15.1358500258746	39.4824544419823,40.5001209034674	34.5475410905317,36.2293846628259	NA	NA	0	0.848638	NA	NA	0.1	0.618306	NA	NA	21.7	0.00137391	17.3069	14.7785	39.9913	35.3885
CREM	MATS_only	ENSG00000095794	NA	63657	chr10	+	35468061	35468204	35416089	35416121	35495822	35495979	0.2	-19.5	143	32	157	51940	27618	ACAGTATGT	6.05	CTTGTTAAATTGTATTTTAGGAA	9.38	CGGGTAAGT	10.75	AATATTTTGTTTTACTGCAGCTG	8.25	none	TATCAGACTAGCACGGGGCAATACAGTATGTATGC	4.16615279290416,3.8529456020295,7.06319203742513,3.45895904041393,3.15559789951452,3.47954682574402,3.15220269928029,1.52773443839465,1.77161512197803,1.81756171440568,1.40884400303162,1.43296116142873,1.46287248664302,1.55593876648809,1.91545492086602,5.78129443063285,5.67882357677115,1.96000038414197,4.94566011904136,4.71833720112445	3.13866024135727,2.90269891056311,6.35095389644625,2.57294471387927,2.34728970184995,2.67167850198284,2.42033592514125,1.35799092541556,1.58552026918007,1.62664051741575,1.26085552962847,1.28243936180471,1.30920872712394,1.38306152711554,1.70263256178997,5.19832027731695,4.51058620968566,1.74222866787811,3.92824781914145,4.24254952625536	3.83058523288481,3.54260567480397,6.4066509607066,3.48214193342314,3.17674758288162,3.47892660165262,3.1516408237968,2.27799150211847,2.60767300542031,2.67530264307596,2.07370349799904,2.10920198869232,2.15322902049512,2.32004672984989,2.85611813333793,5.24390889018558,5.30706959433377,2.92253948527602,4.62190136510579,4.27975615024357	3.40180135088665,3.1460573352472,5.48725985563825,2.83836963315012,2.58943605511515,2.945736170777,2.66861116516383,1.70696971754824,1.98619389380879,2.03770555691722,1.5794837837161,1.60652202252437,1.64005622008192,1.73848300464144,2.14017794131995,4.49137793149984,4.48736690675715,2.18994952135065,3.90802623998283,3.66558663164044	NA	NA	14.7	0.116647	NA	NA	0.2	0.482418	NA	NA	-19.5	0.0305183	3.21528	2.67674	3.42589	2.81276
GAK	MATS_only	ENSG00000178950	NA	16047	chr4	-	853149	853281	853393	853510	845537	845762	0.2	-10.2	132	117	225	112	7387	GTGGTGCGT	6.46	CTTTGCCTCTGTTCACTAAGACC	3.99	AAGGTAACG	10.19	TCCGATCTCCATCTCCACAGGCT	9.84	none	GCTGCCAGCCCCCACCGGCATTGTGGTGCGTGATC	30.2335	31.1168	44.6443	41.1669	NA	NA	3.7	0.306745	NA	NA	0.2	0.733588	NA	NA	-10.2	0.00479435	30.2335	31.1168	44.6443	41.1669
UBAP2	MATS_only	ENSG00000137073	NA	49503	chr9	-	34011624	34011662	34017047	34017187	33998784	33998862	0.2	26.6	38	140	78	5385	12762	CTGGTAACT	5.45	TTTTCCTCTTTTTTCCCAAGCTG	8.32	CAGGTAAGT	10.86	CAATTGTATGTACTTTCCAGGCA	5.64	none	TTGACACTTCCTAGAGCTCAGCCTGGTAACTTCCC	13.3704	14.5107	13.708	11.3576	NA	NA	2	0.910706	NA	NA	0.2	0.916857	NA	NA	26.6	0.0323519	13.3704	14.5107	13.708	11.3576
TTLL3,ARPC4-TTLL3	MATS_only	ENSG00000214021	NA	34667	chr3	+	9876110	9876187	9874787	9874929	9876364	9877088	0.3	18.2	77	142	724	1181	177	caggtctgt	6.84	ctattatccccattttccagccg	7.54	AAGGCAAGG	2.76	AGCTTCTCTTGCTCCCACAGCCC	9.43	none	gggcacagctgggatgcagacccaggtctgttgga	29.045	30.6084	81.1579	63.6384	NA	NA	10.5	0.602656	NA	NA	0.3	0.789193	NA	NA	18.2	0.00898413	29.045	30.6084	81.1579	63.6384
ZNF263	MATS_only	ENSG00000006194	NA	4565	chr16	+	3338453	3338570	3333447	3334205	3339392	3341460	0.3	23.7	117	758	2068	4248	822	CAGGTAAGG	11.08	GTTTCTTTCATTGTGAACAGAGT	6.92	CAGGTGAGA	9.22	GGTTTCTCTCTCTCTACCAGGAG	9.94	downstream	CTGAGCCCCAGAGGCCCAGCTCCAGGTAAGGAATG	7.74538	6.86446	8.40933	7.3967	NA	NA	-1.8	0.718997	NA	NA	0.3	1	NA	NA	23.7	0.00581879	7.74538	6.86446	8.40933	7.3967
UGP2	MATS_only	ENSG00000169764	NA	23000	chr2	+	64089974	64090062	64084962	64085070	64109599	64109741	0.3	28	88	108	142	4904	19537	CAGGTTGGT	8.08	GAAACTTCTTTTGCCCACAGGCA	9.32	TCGGTAAGT	11.78	TAATGTTATTTTTCTTTCAGATT	9.58	none	CTGGAACAGATTGTGACGTAAGCAGGTTGGTATTT	13.9922613525246,14.7631411865234	7.77737040954155,8.51331887283406	11.7043715382386,12.6660949521632	7.37103920773461,8.0487697929783	NA	NA	-0.2	0.971579	NA	NA	0.3	0.784307	NA	NA	28	0.00484961	14.3777	8.14534	12.1852	7.7099
TM2D3	MATS_only	ENSG00000184277	NA	40882	chr15	-	102191898	102191976	102192473	102192585	102190206	102190364	0.4	17.8	78	112	158	497	1534	CAGGTACTA	7.64	TGTACGATCCTTAAATTTAGAGC	5.79	GTGGTGAGT	8.95	TTCTCTCTTGCCTCTCACAGAAA	10.05	none	TTCACAGTAGTTCCCAGGGCAGCAGGTACTAGACG	13.9642826647155,13.190143327226	11.2712482414216,10.6464029231338	14.8115671367167,13.9904568050437	12.7047685885721,12.0004530591416	NA	NA	-13.1	0.313053	NA	NA	0.4	0.800937	NA	NA	17.8	0.00069731	13.5772	10.9588	14.401	12.3526
CEP63	MATS_only	ENSG00000182923	NA	23678	chr3	+	134206860	134206932	134205068	134205398	134214137	134214206	0.7	31.3	72	330	69	1462	7205	gaggtgagt	10.03	ctttgtgtcctctaaaCcagggg	8.08	CAGGTGGGC	8.07	GATATTTTTTTCTTTGTCAGTTG	7.28	none	taggaaccaggctacagagcaggaggtgagtgaca	11.67616534647,9.7815847345668,11.2568171155781,33.7725350947342	8.09485386654785,6.65034697630627,7.64278690420096,23.5000810410055	10.2425679587689,8.49414979596655,9.79536934713338,29.6176042605654	7.15686158496919,5.81142315376132,6.68022370351173,20.6444480022234	NA	NA	-3.1	0.830545	NA	NA	0.7	1	NA	NA	31.3	0.0222888	16.6218	11.472	14.5374	10.0732
DOPEY1	MATS_only	ENSG00000083097	NA	40926	chr6	+	83806449	83806542	83777384	83777498	83806643	83806834	0.8	44.4	93	114	191	28951	101	ACAGTAAGG	5.42	GTCATTTTTCCAATTCCTAGGAA	7.78	CAGGTAAAA	8.59	TCCTGCAAACTCTTTTGTAGGTA	7.45	none	AGGAGAGTTTCAACCACTGCTAACAGTAAGGAACA	3.95273554531663,3.96911839799127	2.63440943072364,2.64532823394065	4.09726429504027,4.11424617418324	2.33697894809331,2.34666499497689	NA	NA	-26.3	0.810091	NA	NA	0.8	1	NA	NA	44.4	0.0308397	3.96093	2.63987	4.10576	2.34182
NKIRAS2	MATS_only	ENSG00000168256	NA	27222	chr17	+	40174587	40174658	40174416	40174490	40175671	40176283	0.9	-13.1	71	74	612	97	1013	GAGGTGTGT	6.14	CGTCCTGGTCTATAGCACAGATA	0.64	CAGGTGCGT	9.73	GCTCTGTCCCTCTTCCCCAGGTC	11.63	none	TGACAAATCCAAGGACAAGAAGGAGGTGTGTGGCA	10.457047886905,10.7794319077345	10.9139678343014,11.25043840149	13.821850213255,14.2479689128387	14.9159277122114,15.3757761132392	NA	NA	-10.4	0.594461	NA	NA	0.9	0.16602	NA	NA	-13.1	0.0349793	10.6182	11.0822	14.0349	15.1459
FAM208A	MATS_only	ENSG00000163946	NA	45315	chr3	-	56704100	56704173	56705627	56705720	56703727	56703819	1	-19.2	73	93	92	1454	281	TGGGTAATC	4.2	GTATTTTTTTTTAAATTTAGGTT	9.76	CAGGTGAGT	10.67	AATTTTTCCGTCTTTTCTAGGTG	12.67	none	ACAATTCTTGGCAGTCCTTCCATGGGTAATCTTTT	8.85177	8.56895	8.97167	6.95173	NA	NA	1	0.992272	NA	NA	1	0.7952	NA	NA	-19.2	0.0239784	8.85177	8.56895	8.97167	6.95173
MAGI1	MATS_only	ENSG00000151276	NA	21859	chr3	-	65361419	65361620	65364935	65365229	65350527	65350621	1	20.1	201	294	94	3315	10798	ATGGTAAAG	5.39	AAAACTCAATATCAAAGCAGGCA	0.33	TTGGTGAGT	9.27	TGCTCTGTCCCTCTTTGCAGAGT	12.41	none	ACCCTCCGCATCATTCCTGGGGATGGTAAAGTATA	3.52918816741678,3.51065085253421,3.59665235316978	2.61916874570437,2.80944565402761,2.87826951386148	2.58912795776855,2.72171924405702,2.78839404287065	1.44212130627073,1.70129357281321,1.74297068809169	NA	NA	-2.8	0.541623	NA	NA	1	0.6854	NA	NA	20.1	0.00637841	3.5455	2.76896	2.69975	1.6288
TBCEL	MATS_only	ENSG00000154114	NA	14245	chr11	+	120924338	120924441	120918236	120918376	120925760	120926017	1	31.8	103	140	257	5962	1319	AGAGTAAGC	6.31	TCTGAATTTGTCGGTTTTAGAAA	8.01	GAGGTGAAG	4.41	ATTTCCTTTTTTCTCTGCAGTTT	11.11	none	ACATGATACTACAGGAGTTACCAGAGTAAGCCCAG	3.54101525599896,3.65626613696049	3.41346004072235,3.5245593295926	4.11908083704006,4.25314625639016	3.47779236422423,3.59098550370564	NA	NA	-34.6	0.0611904	NA	NA	1	0.645457	NA	NA	31.8	0.0225522	3.59864	3.46901	4.18611	3.53439
RBM12,CPNE1	MATS_only	ENSG00000214078	NA	21227	chr20	-	34243123	34243266	34252681	34252823	34220716	34220845	1.1	-10.6	143	142	129	9415	22278	TGGGTGAGG	6.74	TTGCCTTTTCTCATCTGCAGGTG	13.07	CCGGTAAGA	10.1	CCCAGCTCCTTTTCCCTCAGATG	8.94	downstream	GTGCATATTGTAGGGGGTGAACTGGGTGAGGCTTT	114.735572031762,111.803563681866,117.348477265279,110.104744100755,117.170586698429,85.0586913918494,105.496174283981	116.446438358946,113.470709702714,119.098305629266,111.7465583682,118.917762467625,85.4813591683964,107.069268391005	110.786738993249,107.955641034406,113.309716348865,106.31528941375,113.137948208872,82.2962931077686,101.865331895067	131.649438569881,128.285205086658,134.647528010996,126.335952207849,134.443413516791,104.652466292054,121.048005163662	NA	NA	6	0.83767	NA	NA	1.1	0.786272	NA	NA	-10.6	0.0373304	108.817	110.319	105.095	125.866
GATAD2A	MATS_only	ENSG00000167491	NA	43402	chr19	+	19546939	19547028	19516652	19516828	19576148	19576423	1.1	12.9	89	176	275	30111	29120	CAGGTGAGT	10.67	TTCTCTGTCCTTTGCTTTAGGTT	13.26	CCGGTAAGT	10.91	GTCTTCTCCTCCCTCCCAAGTTC	7.64	none	CCAGCACCCCATACCCCGAAGCCAGGTGAGTGCTT	15.8749	21.1538	24.4714	24.7024	NA	NA	-0.5	0.453313	NA	NA	1.1	0.787632	NA	NA	12.9	0.0367418	15.8749	21.1538	24.4714	24.7024
LIPT1	MATS_only	ENSG00000144182	NA	48199	chr2	+	99772763	99772889	99771417	99771514	99778419	99778738	1.1	48.1	126	97	319	1249	5530	caggtaatt	8.55	tctacatttttttttaatagact	7.56	CAGGTGGGT	8.56	TTGTCTTCCATTTTTAAAAGCAT	6.37	none	tacaggcgcctgccaccacgcccaggtaatttttg	2.32838434626137,1.96082465167869,2.12134381864744,1.94559494564623,2.2200474084368	2.77330543731914,2.33551031936008,2.52670241325265,2.31737043338447,2.64426685345569	2.86651349976625,2.41400451937263,2.61162239110673,2.3952549697076,2.73313805627639	3.3857459004026,2.85127068324838,3.08468451476342,2.82912489153383,3.22821119454931	NA	NA	-10.6	0.8634	NA	NA	1.1	0.107285	NA	NA	48.1	0.0168884	2.11524	2.51943	2.60411	3.07581
SAMD9L	MATS_only	ENSG00000177409	NA	26705	chr7	-	92776195	92776459	92777506	92777658	92775221	92775353	1.2	-21.5	264	152	132	1047	842	TTGGTAAGG	8.92	TCTGTTTTTTCCATCTTTAGCAT	9.62	CTGGTAAGT	10.65	tgatgtttacattttaacagggt	7.62	none	CTGTGAGTGACACAGCAGAAAGTTGGTAAGGTGTA	0.753335	0.932258	1.72846	1.5747	NA	NA	15.8	0.0780546	NA	NA	1.2	0.659193	NA	NA	-21.5	0.0327784	0.753335	0.932258	1.72846	1.5747
TAB2	MATS_only	ENSG00000055208	NA	45337	chr6	+	149691044	149691235	149639062	149639151	149699153	149700654	1.2	12.3	191	89	1501	51893	7918	CAGGTCAGT	8.94	TTTTTTTCTTTCTTTCACAGAAA	12.28	AGGGTAAGC	9.04	AATTTATTTTGTTTTCATAGAAT	7.53	none	TGTTGTATCCAGGTGCATGTTACAGGTCAGTGTTC	8.16469	10.8223	7.72547	9.21055	NA	NA	-8.3	0.0711841	NA	NA	1.2	0.723529	NA	NA	12.3	0.0172971	8.16469	10.8223	7.72547	9.21055
ZEB1	MATS_only	ENSG00000148516	NA	4625	chr10	+	31662050	31662102	31608140	31608221	31676052	31676198	1.3	-40.4	52	81	146	53829	13950	ATGGTAAGA	9.48	CTACTGTCTGCTTGACATAGGAA	6.67	ACGGTGAGT	11.45	ACTCTTCTCTCCTCCCTTAGGAC	12.11	upstream	AGTGACTATCAAAAGGAAGTCAATGGTAAGAGTTT	16.6182276842249,15.6395817020982,16.4517123767677,16.443474163259,17.0231300694807,15.6470707276539	13.3557543720836,12.136601973497,13.2219291779745,13.2153082820417,13.6811667388477,12.1424135945537	12.6199725706632,11.831211735651,12.4935199396947,12.4872637955086,12.9274576462574,11.8368771203608	9.03214085161692,8.49459093746749,8.94163843827407,8.93716090275165,9.25220856547177,8.49865857877833	NA	NA	13.5	0.057699	NA	NA	1.3	0.64495	NA	NA	-40.4	0.00741617	16.3039	12.9589	12.3661	8.8594
COASY	MATS_only	ENSG00000068120	NA	2818	chr17	+	40714373	40714505	40714091	40714237	40714629	40715340	1.3	-28	132	146	711	136	124	TCGGTCAGC	4.32	TGACAAGGGTTCCTGTCCAGTTT	2.82	TCAGTGAGT	7.68	GTCTCCCTGACTGTCCGCAGGCC	10.1	none	CCGTCCCCTCCCCCGGCTCCTGTCGGTCAGCACTG	20.7497258450693,23.2078146078355,21.8718217913356,27.2565692214851	25.8802302729771,28.9460974409003,27.2797717269017,33.9959329183617	21.177937445478,23.6867537277743,22.323190059189,27.8190623944132	26.8689187096402,30.0519095424343,28.3219260886177,35.2946611528263	NA	NA	16.8	0.577933	NA	NA	1.3	0.407405	NA	NA	-28	0.0387955	23.2715	29.0255	23.7517	30.1344
TGDS	both	ENSG00000088451	613	33377	chr13	-	95243106	95243197	95244494	95244563	95235347	95235490	6.7	11.8	91	69	143	1297	7616	TAGGTAAGC	8.89	ATGTTTGCTTTTTCATATAGGGT	9.19	CAGGTATGA	9.46	TTTTCACTCTTTTCTTTTAGATC	12.1	none	CATTTTGCCGCACAAACACATGTAGGTAAGCATTG	6.03509	5.42673	4.53417	4.69281	0.7	0.53034	-9.1	1	6.7	0.00105024	1.4	0.623028	11.8	0.0286679	10.5	1	6.03509	5.42673	4.53417	4.69281
GATA3	MATS_only	ENSG00000107485	NA	64039	chr10	+	8105958	8106101	8100267	8100804	8111435	8111561	1.6	-10.7	143	537	126	5154	5334	CTGGTAAGT	10.65	TGTGCTTTTGTTTCCAGAAGGCA	4.38	CAGGTAGGA	9.79	TCCTCTCTCCCCACTCTCAGTCT	8.74	none	CCTCATTAAGCCCAAGCGAAGGCTGGTAAGTTCTC	16.2076357495011,16.1917976689641	16.9481969743802,16.9316352183791	84.6409160860476,84.5582050931297	74.7314594758829,74.6584319910531	NA	NA	3.7	0.170274	NA	NA	1.6	0.557339	NA	NA	-10.7	0.0496429	16.1997	16.9399	84.5996	74.6949
PGBD2	MATS_only	ENSG00000185220	NA	58442	chr1	+	249208637	249208758	249208014	249208078	249210800	249212769	1.6	15.4	121	64	1969	559	2042	CAGGTCTGT	6.84	TCTTTTTCTGGCCCATGCAGAGC	8.58	CAGGTAGGA	9.79	TCTGTTTCCTGTCATAACAGAGA	6.6	none	CCTGAACTCCAAAGTCCATGGGCAGGTCTGTACTG	0.587404111602352,0.783109123194278	0.925314648300036,1.23360107393937	1.46373816982751,1.95141077857418	2.28559066853185,3.04707929185668	NA	NA	12.1	1	NA	NA	1.6	1	NA	NA	15.4	0.0249294	0.685257	1.07946	1.70757	2.66633
NNT	MATS_only	ENSG00000112992	NA	28572	chr5	+	43619133	43619221	43615949	43616167	43624133	43624222	1.7	-12.1	88	218	89	2966	4912	AAGGTAGGT	10.29	ttatttatttatttTTAAAGTTA	6.21	GGGGTAGGT	6.59	TAACTGGGTCTGTCTTCTAGATT	8.69	none	TGCTGGAAAAGTTCCTCCAGCTAAGGTAGGTACAA	14.171581954785,14.0334783116191	10.4991703846062,10.2836504249784	12.1315047384977,12.0302245348693	8.62986798614543,8.33197387735759	NA	NA	5.4	0.915913	NA	NA	1.7	0.118547	NA	NA	-12.1	0.0451076	14.1025	10.3914	12.0809	8.48092
PDS5A	MATS_only	ENSG00000121892	NA	37340	chr4	-	39928394	39928481	39929580	39929784	39927455	39927553	1.7	17.3	87	204	98	1099	841	GAGGTAAAA	7.3	TGTGTTTTTTTTTTTAACAGGAC	11.96	AAGGTAAAT	8.88	attatttttatttatttaaGAAT	5.48	none	TAATAGATACTTTTATTTATTAGAGGTAAAAAAAA	20.1599411377106,20.4341950441101	18.475147279244,17.9436547402881	16.2152249612865,15.812681401941	12.4181775019877,11.3668500126489	NA	NA	-3.2	0.468373	NA	NA	1.7	0.697173	NA	NA	17.3	0.0325103	20.2971	18.2094	16.014	11.8925
NFIC	MATS_only	ENSG00000141905	NA	16173	chr19	+	3456547	3456633	3452479	3452664	3462749	3463603	1.7	55.1	86	185	854	3883	6116	CAGGTAGGG	9.46	GGTCTCTCTCCTCCCTGCAGCCT	10.11	CCGGTGAGT	10.9	GTCGCCACTGGGCCACTCAGTCC	-0.49	none	TCCTGCGGGCATTTATCAGGCACAGGTAGGGGCCG	2.54080246911684,2.36200082584567,2.31678663974495,2.38802671579092,2.49230425639448	2.97490925793228,2.44049361272123,2.39377689222912,2.46738438154814,2.91812492157611	2.79441853532039,2.69748372839138,2.64584761973106,2.72720616281055,2.74107936149301	3.34751416017194,2.99174820747266,2.93447919268698,3.02471301795859,3.28361763306901	NA	NA	-39.5	0.580679	NA	NA	1.7	0.786154	NA	NA	55.1	0.0212526	2.41998	2.63894	2.72121	3.11641
MTCH2	MATS_only	ENSG00000109919	NA	45714	chr11	-	47657096	47657123	47660250	47660357	47656223	47656286	1.8	15	27	107	63	3127	810	GAGGTATGT	9.81	CTTTTTCTTTTTTTCTATAGCAT	10.2	CAGGTAAGA	10.77	TCTTTGATTTTGATTTCCAGGAG	9.19	none	TTACCAGGAGAGTGACAAGGGTGAGGTATGTTGGA	13.4179	17.4741	10.8783	14.5253	NA	NA	-11.7	0.20985	NA	NA	1.8	0.27605	NA	NA	15	0.0255714	13.4179	17.4741	10.8783	14.5253
FUZ	MATS_only	ENSG00000010361	NA	3844	chr19	-	50315703	50315993	50316252	50316556	50315507	50315592	2	11.4	290	304	85	259	111	caggttggt	8.08	TGTCCCTAACCCCTCCTTAGCTC	5.92	CAGGTGGGG	6.92	TTCTCACTTCCATTCCACAGCAT	7.79	none	ctgatgttctctataagaaaggcaggttggtctga	17.8613	22.2555	11.5619	14.4756	NA	NA	12.9	0.885439	NA	NA	2	0.516794	NA	NA	11.4	0.0314569	17.8613	22.2555	11.5619	14.4756
MAGI1	MATS_only	ENSG00000151276	NA	21858	chr3	-	65361419	65361623	65364935	65365229	65350527	65350621	2	22	204	294	94	3312	10798	ATGGTAAAG	5.39	ATTAAAACTCAATATCAAAGCAG	-1.72	TTGGTGAGT	9.27	TGCTCTGTCCCTCTTTGCAGAGT	12.41	none	ACCCTCCGCATCATTCCTGGGGATGGTAAAGTATA	3.52918816741678,3.51065085253421,3.59665235316978	2.61916874570437,2.80944565402761,2.87826951386148	2.58912795776855,2.72171924405702,2.78839404287065	1.44212130627073,1.70129357281321,1.74297068809169	NA	NA	-3.6	0.503662	NA	NA	2	0.674913	NA	NA	22	0.0038404	3.5455	2.76896	2.69975	1.6288
ABLIM1	both	ENSG00000099204	1905	28916	chr10	-	116207638	116207779	116211382	116211430	116205070	116205162	42.9	43.5	141	48	92	3603	2476	TAGGTATGC	7.53	TGATTCCCATCTAGATGCAGCTG	0.63	ATGGTAAAA	4.79	TGTCTTTGCTGTGGAATTAGGAC	5.75	none	GGTCCCCCCTCATTTGCTGTCGTAGGTATGCAACT	5.53420489383044,5.5756963738463,5.51481524874515,5.41990330535983	4.57950162228758,4.58185439537922,4.53182504802294,4.51685990948789	15.7301502010229,15.7795746189212,15.6072771708529,15.7880768769667	11.0165032562158,11.0310235644501,10.9105756274406,11.0443793830215	-20.9333	0.00395003	-10.5	0.681312	42.9	0.000258684	2.1	0.782813	43.5	0.0254893	8.3	0.246651	5.51115	4.55251	15.7263	11.0006
CD1E	MATS_only	ENSG00000158488	NA	39477	chr1	+	158324166	158324463	158323778	158323836	158325616	158325895	2.1	16.3	297	58	279	330	1153	AATGTAAGT	8.62	GTCATTTCCCTCTCTCTCAGCTC	9.01	CAGGTAAGA	10.77	TTCTATCTTCTTCTTCCTAGTGA	7.72	within_and_downstream	TCTGCTGGTCAATTTCAGCTTGAATGTAAGTTCGT	213.930299057576,189.87470560276,217.103990307331,218.182916819074,260.983660739328,186.645849012444,254.922104747963	192.873554774973,171.185706712819,195.734865752404,196.707595620859,235.295545356259,168.27466021227,229.830616560888	134.378639827683,119.268307429952,136.372169099852,137.049888327847,163.934840001143,117.240126481686,160.1273211366	84.8707703980027,75.3273968885684,86.1298422665444,86.5578757178967,103.537855300602,74.0464397378889,101.133105112975	NA	NA	-18.6	0.00393799	NA	NA	2.1	0.670993	NA	NA	16.3	0.0321146	220.235	198.558	138.339	87.3719
NUP88	MATS_only	ENSG00000108559	NA	18198	chr17	-	5298210	5298301	5302871	5302970	5294880	5294982	2.2	13.1	91	99	102	4570	3228	CAGGTAAGG	11.08	TGTAATGTCTTCCATGGTAGATG	7.98	CAGGTGAGT	10.67	CTATGACTGTGTTTTTCCAGGCA	8.92	none	TTTGTACGAAGCCATTGCCCTGCAGGTAAGGACTC	9.5152	11.1041	10.8085	11.916	NA	NA	-8.3	0.381633	NA	NA	2.2	0.551378	NA	NA	13.1	0.0300132	9.5152	11.1041	10.8085	11.916
MELK	MATS_only	ENSG00000165304	NA	686	chr9	+	36597218	36597287	36589532	36589649	36599390	36599483	2.4	21.4	69	117	93	7569	2103	AAGGTAAGT	11	AAATATCTTTGTTTTCCCAGGAA	7.37	GAGGTTAGT	7.15	CATTTTTATCTTATTGGCAGGGT	6.65	none	CTTTGGTCTCTGTGCAAAACCCAAGGTAAGTGCAG	32.4098	25.5627	12.9999	12.1932	NA	NA	-1	0.535862	NA	NA	2.4	0.395959	NA	NA	21.4	0.00875871	32.4098	25.5627	12.9999	12.1932
MAN2B1	MATS_only	ENSG00000104774	NA	42839	chr19	-	12769241	12769324	12772073	12772190	12769037	12769158	2.6	11.6	83	117	121	2749	83	CTGGTATTT	3.5	TCCGTCGCCTCCCCCAGCAGCAG	5.53	CAGGTCAGT	8.94	CAATGCCCCTGCCGCTGTAGGTC	6.71	none	AGCTGAACAAGGCCAACCTCACCTGGTATTTGGGG	15.3376790560868,15.3519643827457	18.7178373450878,18.7352709098302	17.503793084603,17.5200959033716	23.6790546131777,23.7011089949969	NA	NA	-7.2	0.818848	NA	NA	2.6	0.409902	NA	NA	11.6	0.0419215	15.3448	18.7266	17.5119	23.6901
VPS29	MATS_only	ENSG00000111237	NA	51861	chr12	-	110937339	110937351	110939853	110939912	110933816	110934008	2.7	10.1	12	59	192	2502	3331	AGAGTAAGT	9.35	AACTTCTTCATTCCACTAAGGCT	3.4	ATGGTGAGG	7.61	CTCACCTTGACACTTTAAAGTTG	3.29	upstream_and_within	TCATTCCACTAAGGCTGGGCACAGAGTAAGTTTCT	43.1332779462411,42.6631604754373	42.6754369599554,42.2103095816452	29.9786267134227,29.6518841879358	33.4184504283619,33.0542166362272	NA	NA	-11.3	0.233981	NA	NA	2.7	0.0215611	NA	NA	10.1	0.0153849	42.8982	42.4429	29.8153	33.2363
SYNE2	both	ENSG00000054654	1571	26742	chr14	+	64682003	64682072	64680911	64681188	64682965	64683105	21.1	14.2	69	277	140	815	893	CTGGTAGGC	6.99	ATGACATTGTTCTTTTTCAGATG	11.17	CAGGTAACA	8.88	CTTGCTGTCTTTCGTTTCAGGTA	13.39	none	ACAAAAACTTTGAAAGCGTCTTCTGGTAGGCCCCC	6.07720899964678,6.05887486818558,10.4662818187934	4.96324164186185,4.94826820179407,10.6239374340988	3.40232190826324,3.39205755547514,6.47643263342626	2.93217863825888,2.92333264520109,7.324237892045	22.5867	0.000850556	1.4	0.812359	21.1	0.0524369	2.8	0.219	14.2	0.00305769	7.3	0.0137655	7.53412	6.84515	4.4236	4.39325
CBR4	MATS_only	ENSG00000145439	NA	32804	chr4	-	169927035	169927065	169927905	169928042	169922725	169923356	3.1	-35.8	30	137	631	840	3679	AAAGTAAGT	9.72	AAATGGTAATACCTTAAAAGGCC	0.49	TAGGTGAGT	8.83	tttttttttttttGTCCTAGGAA	11.46	none	AGAAGGGAGATGCTGCTCCATAAAAGTAAGTGACC	7.52717	7.89547	6.80754	6.28762	NA	NA	32.2	0.0368563	NA	NA	3.1	0.503778	NA	NA	-35.8	0.00107688	7.52717	7.89547	6.80754	6.28762
ALDOC	MATS_only	ENSG00000109107	NA	64264	chr17	-	26902982	26903038	26903818	26903952	26902438	26902562	3.1	10.1	56	134	124	780	420	GAAGTAAGT	9.82	CTTCCAACCTTTTCCTCTAGAAG	8.68	CAGGTAAGG	11.08	TTATCTTGTCTCCACTCCAGGGA	9.11	none	TTTGCCTCATTCTGAAGCCTTGGAAGTAAGTACAC	136.101	72.2947	177.283	147.629	NA	NA	1.8	0.576145	NA	NA	3.1	0.357708	NA	NA	10.1	0.0264945	136.101	72.2947	177.283	147.629
MED24	both	ENSG00000008838	2064	12301	chr17	-	38191168	38191225	38191369	38191450	38189597	38189709	33.2	22.1	57	81	112	144	1459	caggtattt	7.51	CTTTTTTTTCTCCCCATAAGCAT	4.66	CCTGTATGT	4.27	TACTTCCTTCCCTCTGCCAGCTT	6.91	none	GGCACCCGAGCcaatcaaccaacaggtatttactg	16.8610925738541,16.938604356914	17.9876145631141,18.0703050573199	15.8547006919688,15.9275860115371	16.0404316592224,16.1141707988132	1.55333	0.802074	-0.3	0.215464	33.2	0.0140646	3.1	0.249404	22.1	0.0357496	20	0.440879	16.8998	18.029	15.8911	16.0773
GALNT11	MATS_only	ENSG00000178234	NA	44105	chr7	+	151813988	151814123	151810329	151810483	151814241	151814460	3.4	17.2	135	154	219	3505	118	AAGGTACAT	7.87	tgtgtgataaatatgaacagaca	2.42	AAGGTGAGA	8.68	TTTACTTTTTTTAAATTCAGGAG	7.9	none	CATTGATTCTCAGATACAGTTTAAGGTACATGTTA	7.92475	5.33114	9.10847	6.21294	NA	NA	-0.7	0.470872	NA	NA	3.4	0.0749976	NA	NA	17.2	0.000873243	7.92475	5.33114	9.10847	6.21294
TGIF2-C20ORF24,C20orf24	MATS_only	ENSG00000101084	NA	17096	chr20	+	35236292	35236403	35236117	35236221	35240412	35240960	3.4	27.5	111	104	548	71	4009	CAGGTCAGG	7.2	GGCTTTTTTTCCTGTTACAGGAA	10.62	AGGGTAAGT	10.45	AGTGCTTGTCTCCTCACTAGGTC	8.4	none	GCACCACTCCTCAGGAGCATCTCAGGTCAGGCAGG	33.5255105734144,28.8871299511732,29.6131978494073,49.8313169570935,26.9298795136651	30.9342701857116,26.6543974279687,27.3243463758889,47.9302337307188,24.8484260104002	31.2600416285308,26.9350971650388,27.6121014025802,56.6811216432571,25.1101069081423	38.3677281448141,33.0594084890517,33.8903451476634,59.0498024155094,30.819464893467	NA	NA	5	0.916108	NA	NA	3.4	0.788163	NA	NA	27.5	0.0221713	33.7574	31.5383	33.5197	39.0373
SMAD9	both	ENSG00000120693	2179	59643	chr13	-	37441409	37441520	37446794	37447052	37439673	37439895	5.9	19.1	111	258	222	5274	1514	GAGGTAAAT	8.39	GTTCTACTGCTTTCTTTTAGTTG	8.31	CAGGTCAGT	8.94	TCTGGTTTGTTTTCTTCCAGACT	8.85	none	GTAGTGCTATCGATACCAAATGGAGGTAAATTGCA	0.734564606917223,0.719983657101806	0.639168619587656,0.626481259649489	0.415672413155711,0.407421404954659	0.541027255125005,0.530287980211043	NA	NA	-33.2	1	5.9	0.327038	3.4	1	19.1	0.00841136	44.5	1	0.727274	0.632825	0.411547	0.535658
RMST	MATS_only	ENSG00000255794	NA	37401	chr12	+	97889708	97889834	97888472	97888659	97924432	97924637	3.6	36.6	126	187	205	1049	34598	CAGGTAAAA	8.59	AAACCTCTATTGTATTCCAGTTG	6.85	AAGGTAAGA	10.57	TTGTCTGGCTTTCCTTGCAGTGG	9.95	none	CATTTCATTCACAGCAGGATGGCAGGTAAAAGCAT	7.84144	5.6103	4.86573	2.17336	NA	NA	2.9	0.668195	NA	NA	3.6	0.650526	NA	NA	36.6	0.0454801	7.84144	5.6103	4.86573	2.17336
BTN2A1	MATS_only	ENSG00000112763	NA	62748	chr6	+	26463024	26463125	26459708	26460056	26463471	26463753	3.7	14.3	101	348	282	2968	346	AAAGTGAGA	4.23	ccttctcgttattattctagagc	7.69	CAGGTGCGT	9.73	ACCCTGATATCTCTCCACAGGAC	11.71	none	TTGGAGTCGACACACCCATCTCAAAGTGAGAAAAT	26.3333735346968,14.8763168589711,14.1785916245722,13.1478305191668	21.3691548090355,11.9331280815573,11.3734435395603,10.5466122473192	30.1578083961015,17.0828092505022,16.2815956704546,15.0979495090152	27.0826156532259,15.6935408609492,14.9909500575537,13.9011317835284	NA	NA	18	0.370256	NA	NA	3.7	0.148094	NA	NA	14.3	0.0324175	17.134	13.8056	19.655	17.9171
TEX10	MATS_only	ENSG00000136891	NA	53013	chr9	-	103072580	103072661	103082546	103082680	103065913	103066124	3.9	34.7	81	134	211	9885	6456	TTGGTAAGT	10.47	GTTTTCTCCTTTTCTGACAGGCA	9.93	GAGGTAATA	7.96	TTCTGTCTCTGTTATTGTAGGGA	8	none	GCAAAGTGCCATCAGTAAGCATTTGGTAAGTATCC	12.3683846167588,12.0304971110858	11.0831739025461,10.7520873893224	9.80796513032657,9.53998585766778	9.08151435239258,8.78963653598764	NA	NA	-46.4	0.663556	NA	NA	3.9	0.426706	NA	NA	34.7	0.00755748	12.1994	10.9176	9.67398	8.93558
MAPK11	MATS_only	ENSG00000185386	NA	54199	chr22	-	50705997	50706056	50706248	50706378	50705799	50705911	4	-15.8	59	130	112	192	86	AGTGTGAGC	3.73	TGACGCCCCCCGCCACCTAGGTC	7.48	aacgtgagc	6.06	ACCCCCTGACCCCGCCCCAGGTA	5.88	none	CGTCCATCGAGGACTTCAGCGAAGTGTGAGCGGCG	16.1448	16.1781	37.2874	47.7725	NA	NA	4.2	0.972574	NA	NA	4	0.296041	NA	NA	-15.8	0.0350146	16.1448	16.1781	37.2874	47.7725
CCDC90B	MATS_only	ENSG00000137500	NA	15503	chr11	-	82989768	82989872	82991183	82991303	82985681	82985783	4.1	13	104	120	102	1311	3985	CAGGTAATA	8.55	TACCTATTTGCTGCCTACAGGAT	8.12	ATGGTGAGA	7.23	ATTTTTATTTTGTTTTCTAGGAA	11.65	none	AGAGATGGTCACTCAAGCTCAACAGGTAATACACT	10.5186	13.2099	16.1196	15.4535	NA	NA	-7.8	0.411843	NA	NA	4.1	0.668919	NA	NA	13	0.0222822	10.5186	13.2099	16.1196	15.4535
NEDD9	MATS_only	ENSG00000111859	NA	12033	chr6	-	11251796	11251959	11306224	11306388	11213865	11213960	4.1	13.7	163	164	95	54265	37836	CAGGTAATG	9.43	GCTTTGTTTTCCTCTTGTAGCTC	9.98	AGGGTGAGT	9.25	TTCTCTTCCTTCCCTCCTAGAAT	10.79	upstream	CCGCCTTGGCAAATCACTCCTACAGGTAATGAGTG	2.31351	2.8401	5.71861	5.16179	NA	NA	1.2	0.678077	NA	NA	4.1	0.195933	NA	NA	13.7	0.0264775	2.31351	2.8401	5.71861	5.16179
PCM1	MATS_only	ENSG00000078674	NA	16842	chr8	+	17840741	17840798	17830091	17830196	17842955	17843128	4.1	25.3	57	105	173	10545	2157	CAGGTAACA	8.88	ATGTCTGCCCTTTCCTACAGCAC	11.08	TCAGTAAGT	9.14	TGGTCTTTTATGTATTCCAGAAA	7.9	none	AGAAATGCATGCAATGAAGCGCCAGGTAACAATCT	23.0772	17.2712	21.219	13.1671	NA	NA	-2.3	0.776428	NA	NA	4.1	0.383142	NA	NA	25.3	0.0487703	23.0772	17.2712	21.219	13.1671
VPS36	MATS_only	ENSG00000136100	NA	28800	chr13	-	52992126	52992191	53000066	53000201	52991191	52991276	4.2	11.1	65	135	85	7875	850	CAGGTAAAG	9.65	GGATTTTTTTTCCCTATTAGTTG	5.72	GAGGTAAAA	7.3	CTCGCACCTGTGGTTTTCAGGCT	6.76	none	TGGAAGCACTGAAATTACCTCTCAGGTAAAGGAAC	7.87591	7.12353	8.33703	6.96182	NA	NA	-0.4	0.974525	NA	NA	4.2	0.321598	NA	NA	11.1	0.0113231	7.87591	7.12353	8.33703	6.96182
SMAP2	MATS_only	ENSG00000084070	NA	45225	chr1	+	40872407	40872541	40839368	40839895	40878687	40878774	4.2	20.7	134	527	87	32512	6146	CAGGTACTT	8.17	CCTGTTCCTGACTTTCACAGGGC	9.97	AAGGTAGCG	6.91	GTCTTGTTAAATCATTATAGAAA	5.25	none	CCAGTGGACTCAAGAACAGATTCAGGTACTTAGCC	15.5075342123541,13.5871825430988,13.620157397564,16.1360336488762	15.1477391846333,13.369768166978,13.5400306870857,14.5853658562334	23.5105106040478,20.1886073687654,20.3425722331548,23.9422764311317	19.4389950348797,17.7586512034425,18.7741121001988,19.5752083696073	NA	NA	-21.1	0.444856	NA	NA	4.2	0.389881	NA	NA	20.7	0.0171159	14.7127	14.1607	21.996	18.8867
NBPF1	MATS_only	ENSG00000219481	NA	44740	chr1	-	16921425	16921508	16935002	16935145	16921086	16921156	4.3	-35.5	83	143	70	13494	269	TGGGTAAGT	10.24	GTTTGCCTCTTTTTGCACAGGAA	8.89	CAGGTAAAA	8.59	GATCTCTGTGCCCTTTTCAGGGA	10.68	upstream	AGAATTCAAACTTCAGCAGTCATGGGTAAGTAAGG	15.9246	14.2347	16.7148	14.3436	NA	NA	13.8	0.659873	NA	NA	4.3	0.212875	NA	NA	-35.5	0.00150116	15.9246	14.2347	16.7148	14.3436
WASH3P	MATS_only	ENSG00000185596	NA	52915	chr15	+	102506155	102506426	102501806	102501844	102512798	102512897	4.3	37.6	271	38	99	4311	6372	CAGGTGGGT	8.56	CTACTCCCCTATCTGTGCAGGCT	8.64	CAGGTGAGG	10.07	ATGGCAGGATCTCCCAGCAGGTA	2.5	none	AGGTCTCTGGAGACATCTTCAGCAGGTGGGTGCTG	24.1861	35.7052	25.2483	32.8933	NA	NA	-31	0.31463	NA	NA	4.3	0.937959	NA	NA	37.6	0.0154027	24.1861	35.7052	25.2483	32.8933
UBE2A	MATS_only	ENSG00000077721	NA	60154	chrX	+	118715469	118715559	118709337	118709363	118716550	118716639	4.3	56.3	90	26	89	6106	991	ATGGCAAGT	3.26	TCTTTCTTTTCTAACCACAGGAA	9.84	ATGGTAAGA	9.48	ACCTACTTCTTTGTTCTTAGTCT	7.94	none	GTCTCTAAGATGTTCCATCCAAATGGCAAGTATCA	29.3838032157758,27.9113409165442,11.7196622132022	23.3056650891314,22.1377865490301,9.09701470758149	20.1317511153427,19.122921716467,7.67214506932345	19.3751874612387,18.4042704949183,8.02891271235401	NA	NA	-42.6	0.222932	NA	NA	4.3	0.0830215	NA	NA	56.3	0.00309667	23.0049	18.1802	15.6423	15.2695
GGCX	MATS_only	ENSG00000115486	NA	30976	chr2	-	85787937	85788108	85788508	85788596	85780354	85780620	4.4	13.3	171	88	266	400	7317	TTGGTGAGT	9.27	TCTCCATTTATTGATTGCAGATA	8.05	CAGGTAGGC	9.88	TTTTCTCCCTGCTTTCCTAGGTA	11.34	none	TTAGCTGTCTTTCGTTTTCTTTTTGGTGAGTCCAG	2.92952257263123,2.86238931614237	3.26533590090381,3.19050710982172	3.05245312449023,2.9825027781638	3.68722846642797,3.60273153963098	NA	NA	-6.3	0.310262	NA	NA	4.4	0.49164	NA	NA	13.3	0.0100718	2.89596	3.22792	3.01748	3.64498
SAR1A	MATS_only	ENSG00000079332	NA	18340	chr10	-	71921374	71921458	71930168	71930228	71920759	71920825	4.5	12.5	84	60	66	8710	549	CGAGTAGGT	5.76	TGGAAAACTTGTATTCTTAGGTT	5.56	GCCGTGAGT	8.56	CTTTTTAAACAATTTTTCAGCAT	6.02	none	CAACATGTTCCAACACTACATCCGAGTAGGTTTGA	11.9318581117294,12.2101753619197	11.1755710803761,11.4362475134405	11.183229741073,11.4440848166728	9.46767887688337,9.68851777104593	NA	NA	1.4	0.534268	NA	NA	4.5	0.36669	NA	NA	12.5	0.028154	12.071	11.3059	11.3137	9.5781
CD1C	MATS_only	ENSG00000158481	NA	28420	chr1	+	158263001	158263092	158262385	158262664	158263244	158263420	4.5	15.1	91	279	176	337	152	CTGGTGAGT	10.1	TATCTTTCCAATATGTGCAGGAC	7.08	GGGGTAAGA	7.83	CCATTCCTGTTCCTTCACAGCTC	10.1	none	TTGTGTTATGGTTTAAGAAGCACTGGTGAGTTTTT	10.1626	5.51414	27.9004	11.4755	NA	NA	33.2	6.08e-06	NA	NA	4.5	0.340386	NA	NA	15.1	0.0113806	10.1626	5.51414	27.9004	11.4755
C12orf32	MATS_only	ENSG00000171792	NA	52615	chr12	+	2994428	2994700	2986364	2986448	2997076	2997303	4.5	23.3	272	84	227	7980	2376	TGGGTAGGC	6.03	TCTGAATTATTTGCTCCCAGCTT	4.24	CTGGTAAGG	9.68	ACTTTTTTTTTTTTTTTAAGGTA	11.8	within	TGACCACAGCACCATCACTTCCTGGGTAGGCCCAT	19.9510591655925,17.2852760745377,17.6789754211378	22.3525656709073,19.3659026014117,19.8069914892963	15.918242237892,13.791308492426,14.1054272324921	19.5324761226457,16.9226224731723,17.3080618136676	NA	NA	-17.4	0.282392	NA	NA	4.5	0.338661	NA	NA	23.3	0.0459367	18.3051	20.5085	14.605	17.9211
SREBF2	MATS_only	ENSG00000198911	NA	44479	chr22	+	42274662	42274762	42273945	42274127	42276719	42276996	4.7	10.3	100	182	277	535	1957	GCAGTGAGC	3.29	TTTTCATTTGAAATCAACAGGGA	6.14	AGAGTGAGT	7.36	CACCTTTTGATACTTTGTAGGGA	7.43	none	AGAACCAGAACACTCCTCAGCAGCAGTGAGCCATG	114.664	87.1069	106.386	71.2466	NA	NA	-2.2	0.58462	NA	NA	4.7	0.100296	NA	NA	10.3	0.00121598	114.664	87.1069	106.386	71.2466
MAN2B1	MATS_only	ENSG00000104774	NA	42834	chr19	-	12769241	12769321	12772073	12772190	12769037	12769158	4.7	20.9	80	117	121	2752	83	CTGGTATTT	3.5	GTCGCCTCCCCCAGCAGCAGGCA	-3.21	CAGGTCAGT	8.94	CAATGCCCCTGCCGCTGTAGGTC	6.71	none	AGCTGAACAAGGCCAACCTCACCTGGTATTTGGGG	15.3376790560868,15.3519643827457	18.7178373450878,18.7352709098302	17.503793084603,17.5200959033716	23.6790546131777,23.7011089949969	NA	NA	-11.9	0.825067	NA	NA	4.7	0.250175	NA	NA	20.9	0.0101065	15.3448	18.7266	17.5119	23.6901
SIRT1	MATS_only	ENSG00000096717	NA	59523	chr10	+	69665919	69666044	69651241	69651312	69666546	69666694	4.7	57.1	125	71	148	14607	502	TTGGTAAGG	8.92	TGAATTCTTTGTTTTTAAAGAAG	4.19	AAGGTACTA	7.52	CTACCATTTGCTTGATACAGGAA	7.03	none	GTGCAGTGGAAGGAAAACAATTTTGGTAAGGATTA	5.27738361004942,5.52162008616555	4.05563488522832,4.04170662806923	3.75487062904724,3.76346992320963	3.09740282344463,3.14425719738221	NA	NA	-0.8	0.293923	NA	NA	4.7	0.168269	NA	NA	57.1	0.0237664	5.3995	4.04867	3.75917	3.12083
ENDOV	MATS_only	ENSG00000173818	NA	17603	chr17	+	78401467	78401650	78399303	78399420	78402395	78402460	4.9	10.6	183	117	65	2047	745	AAGGTGAGA	8.68	GCTCACTCACCTCTCAACAGGTT	8.32	CAGGTGGGT	8.56	AGCACGTCTGTCTCCCCCAGGCT	8.45	none	CCAGGCTGGGCCGCTCCAGGGGAAGGTGAGAGGTG	9.12007505789495,4.51385847698895,4.74098143427315	10.9911004151849,5.11274110045214,5.36999792063889	12.3039670672383,5.89987680805864,6.19673978572838	16.7321081897591,7.663236980526,8.04882661614695	NA	NA	0.5	0.578823	NA	NA	4.9	0.258292	NA	NA	10.6	0.0438767	6.12497	7.15795	8.13353	10.8147
STARD3NL	both	ENSG00000010270	5664	22619	chr7	+	38218691	38218747	38217952	38218022	38247047	38247330	20.7	15.8	56	70	283	669	28300	AAGGTAACC	9.24	ATTTGTCTTCTATTTCACAGATG	10.19	aaggtaggc	10.08	CTCTTTTTTATTTCCCAAAGGTG	9.34	none	TACTAGTTTGGATAAGTTTAGCAAGGTAACCAAGT	19.1656	16.3698	14.5837	14.7236	-2.08	0.113336	-5.5	0.813091	20.7	0.00302235	5.1	0.31079	15.8	0.0288225	3.1	0.647258	19.1656	16.3698	14.5837	14.7236
FUZ	MATS_only	ENSG00000010361	NA	3846	chr19	-	50315894	50315993	50316252	50316530	50315507	50315592	5.2	10.1	99	278	85	259	302	GTGGTGTGG	0.74	TGTCCCTAACCCCTCCTTAGCTC	5.92	CAGGTGGGG	6.92	TTCTCACTTCCATTCCACAGCAT	7.79	none	TGCGAGGACCGAGAACACGACTGTGGTGTGGAAAA	17.8613	22.2555	11.5619	14.4756	NA	NA	9.5	0.530874	NA	NA	5.2	0.25243	NA	NA	10.1	0.0146469	17.8613	22.2555	11.5619	14.4756
TSNARE1	MATS_only	ENSG00000171045	NA	33239	chr8	-	143399904	143399995	143412261	143412331	143381476	143382005	5.3	-20.2	91	70	529	12266	17899	CCGGTATGT	9.2	GGCTCCTTCTCGGCCCCCAGGCA	8.32	CCTGTGAGT	7.21	GATCTGTCTGTCATCAGCAGAGT	5.82	none	CGAGCTGCTGCGCAGCTCCTGCCCGGTATGTTCCT	25.2484	26.8232	28.9953	26.0144	NA	NA	23.4	0.0097625	NA	NA	5.3	1	NA	NA	-20.2	0.0408968	25.2484	26.8232	28.9953	26.0144
DTYMK	MATS_only	ENSG00000168393	NA	48774	chr2	-	242621333	242621748	242625183	242625292	242617866	242618064	5.3	-15.9	415	109	198	3435	3269	caggtgcgt	9.73	tctctcttttctttttttagaca	10.99	AGTGTAAAA	-4.27	GTTGGGTTCTTTCTTGGCAGAAT	6.93	none	gcctctggagtagctaggactacaggtgcgtgcca	76.0141964852781,70.2926978250959,74.7439504578197	58.7530118492513,54.3307421401678,57.7712112994397	42.3036750062084,39.1195274250959,41.5967534361838	41.4115984768181,38.2945964409285,40.7195840783488	NA	NA	-6.1	0.674487	NA	NA	5.3	0.92634	NA	NA	-15.9	0.0377664	73.6836	56.9517	41.0067	40.1419
POC5	MATS_only	ENSG00000152359	NA	30842	chr5	-	75008431	75008490	75008678	75008776	75003561	75003700	5.3	16.7	59	98	139	188	4731	GAGGTGAAA	2.91	ACATTGTTTTAACTTTTCAGAAA	9.15	CAGGTAGGA	9.79	TGATTATTGGCCTCTCTTAGGAA	6.76	none	AAGGCTTCAACCAACACAGTAAGAGGTGAAACAAA	7.80678688758726,7.52024439926561	6.49124891322704,6.37016528214829	7.65425286450183,7.63532477935088	6.14577401337885,6.19153995558261	NA	NA	-3.4	0.473153	NA	NA	5.3	0.162939	NA	NA	16.7	0.0388264	7.66352	6.43071	7.64479	6.16866
C12orf32	MATS_only	ENSG00000171792	NA	52614	chr12	+	2994448	2994658	2986364	2986448	2997076	2998437	5.4	23.4	210	84	1361	8000	2418	CAGGTGCCC	5.77	CTTTTGTTTCTTCTCTACAGGCA	11.69	CTGGTAAGG	9.68	ACTTTTTTTTTTTTTTTAAGGTA	11.8	within_and_downstream	GCTTCCCATCACTCACACTCGACAGGTGCCCAGCA	19.9510591655925,17.2852760745377,17.6789754211378	22.3525656709073,19.3659026014117,19.8069914892963	15.918242237892,13.791308492426,14.1054272324921	19.5324761226457,16.9226224731723,17.3080618136676	NA	NA	-16.3	0.326574	NA	NA	5.4	0.230967	NA	NA	23.4	0.0329043	18.3051	20.5085	14.605	17.9211
SPPL2A	MATS_only	ENSG00000138600	NA	63874	chr15	-	51012136	51012297	51014320	51014398	50999644	51000071	5.4	25.5	161	78	427	2023	12065	CAGGTATGT	9.8	GCTTGGTATTCTTCTTGCAGCCT	7.47	TTGGTAAAT	4.94	CGTCTTTTATTTATGCCTAGATG	6.67	none	GTTCTGGAAAGGTAACAGCTATCAGGTATGTGCTT	5.84205	5.71416	6.58263	6.13536	NA	NA	-12.4	0.214304	NA	NA	5.4	0.866975	NA	NA	25.5	0.0151576	5.84205	5.71416	6.58263	6.13536
CENPA	MATS_only	ENSG00000115163	NA	171	chr2	+	27015369	27015701	27014998	27015108	27016012	27016194	5.6	-40.5	332	110	182	261	311	GAGGTAAGA	10.06	CTCTCGTTTGTCCACCTTAGATC	9.27	CTGGTAAGC	8.69	TTTTCTCTTTCTGTCTCCAGGCA	12.19	none	CCAGGCCCTATTGGCCCTACAAGAGGTAAGAAGGC	17.0520566911057,18.049917786363	13.4574820512376,14.2449939638656	9.59157548886719,10.1528602767342	8.0884701291642,8.56179541820418	NA	NA	34.4	0.282279	NA	NA	5.6	0.68892	NA	NA	-40.5	0.0296152	17.551	13.8512	9.87222	8.32513
EYA3	both	ENSG00000158161	1451	8981	chr1	-	28324794	28324862	28326470	28326560	28323830	28323889	16.7	13.4	68	90	59	1608	905	CAGGTcagt	8.94	TATTTGTAATGATTTTCTAGACA	5.12	GAGGTAAGC	9.85	TATGTTTTGTCTTTTAACAGGAG	10.8	none	ACCTGAATGTGTTCCTGCCCCCCAGGTcagtgctt	4.31984	4.16122	4.52983	4.17478	6.26	0.0163351	0.7	0.938958	16.7	0.0037995	5.6	0.35878	13.4	0.00384332	6.7	0.261476	4.31984	4.16122	4.52983	4.17478
HACL1	MATS_only	ENSG00000131373	NA	16495	chr3	-	15631046	15631119	15633106	15633187	15624383	15624496	5.6	13.5	73	81	113	1987	6550	CAGGTATCC	7.91	TAAAAAAATGATTGTTTCAGGCC	4.99	CTGGTAATG	5.67	ATAGGGCTCTTTTTTTCCAGGTA	8.28	none	GGGAGCTTTCCAGGAGTTTCCTCAGGTATCCAACT	7.15076	5.7013	7.71678	5.48053	NA	NA	-1.2	0.830112	NA	NA	5.6	0.538017	NA	NA	13.5	0.0444799	7.15076	5.7013	7.71678	5.48053
C11orf30	MATS_only	ENSG00000158636	NA	13957	chr11	+	76250642	76250684	76248838	76248994	76253259	76253411	5.6	54.3	42	156	152	1648	2575	TAGGTAAGT	9.66	TCCCTTACTTATCCTTTCAGAAC	10.16	CTGGTAGGT	8.37	ATCACCTCCTCTATTTTCAGTCA	8.73	none	ACAGAGGTTGCTTTTCCCCTTCTAGGTAAGTGGTG	10.6883	8.10831	8.00439	5.58835	NA	NA	-46.1	0.141322	NA	NA	5.6	0.722014	NA	NA	54.3	0.0192864	10.6883	8.10831	8.00439	5.58835
PUM1	both	ENSG00000134644	1226	39519	chr1	-	31437520	31437757	31438828	31439125	31426560	31426828	9.4	21.7	237	297	268	1071	10692	TGGGTAAGA	8.91	TTGTTTTAATTCCATTTTAGTTG	7.9	CAGGTAGAA	6.68	TCCTGTTCTGTAACCAACAGGAG	7.99	downstream	GGATCCTCTTCAAGCTTAAACCTGGGTAAGAACCA	20.5280186060692,20.5051461619398	18.6189506005623,18.5982052517038	21.2931241903421,21.2693992608821	15.9304390212727,15.9126892284913	-12	0.00127779	-2.3	0.773021	9.4	0.0609093	5.8	0.105526	21.7	0.00102206	9.8	0.325573	20.5166	18.6086	21.2813	15.9216
CASP8	MATS_only	ENSG00000064012	NA	48225	chr2	+	202137620	202137665	202137360	202137499	202149538	202150040	5.8	13.4	45	139	502	121	11873	ATGGTAATG	5.46	GGTTTCCCCTTTTAATTCAGAGA	5.67	AAGGTAGAA	6.33	GTTCAAATTTCACTTTTCAGGGG	7.93	none	GGAAGTCCTGATGAATTTTCAAATGGTAATGCTTG	10.1778678862748,10.7114148289754,10.785501789933,16.1611839529567,8.38142926299641,9.21583926048342	11.4927781045209,12.0952556262691,12.1789141107609,22.181150945804,6.50237266961538,7.02063172208985	14.1110388265591,14.8507715199254,14.9534889057567,24.6735644737942,11.1629523176881,12.2921115894821	13.955877844379,14.6874766467778,14.7890645813569,25.9000442460036,8.42081012092248,9.23078279932876	NA	NA	-1.1	0.796975	NA	NA	5.8	0.386486	NA	NA	13.4	0.0150657	10.9055	11.9119	15.3407	14.4973
HIATL1	MATS_only	ENSG00000148110	NA	8851	chr9	+	97203266	97203381	97200682	97200810	97207245	97207464	5.9	12.5	115	128	219	2456	3864	TGGGTAAGA	8.91	TTAAAATAATCTTTTTATAGGTG	8.08	ATGGTGAGT	10.13	GAGAGTGTGCTTTCCCACAGGTC	9.07	none	CGAGCGAAGTACAGCTTATGGATGGGTAAGATAAT	17.4382	15.2108	15.4567	13.3016	NA	NA	1	0.953495	NA	NA	5.9	0.0755595	NA	NA	12.5	0.0442661	17.4382	15.2108	15.4567	13.3016
KDM6A	both	ENSG00000147050	1581	29821	chrX	+	44919266	44919401	44918526	44918711	44919853	44920009	-22.8	-40.6	135	185	156	555	452	CAGGTGAGA	9.22	TTTTACATAATTTTTCCTAGGCT	7.34	CAGGTAAAA	8.59	CTTCCTTCTGTGATTCTTAGGCA	8.71	none	GGGTGCCATGAACACAGCACAGCAGGTGAGAAGTT	6.94697	5.06008	5.54775	3.22288	9.60667	1.18e-08	26.7	0.868771	-22.8	0.000406888	6	0.689725	-40.6	0.00463013	-23	1	6.94697	5.06008	5.54775	3.22288
FAM156A,FAM156B	MATS_only	ENSG00000179304	NA	43752	chrX	+	52929596	52929686	52928493	52928567	52936135	52937089	6.1	14.9	90	74	954	1029	6449	ACGGTAAGG	10.38	TTTCTCCTTCCGCACAGGAGAAT	-6.89	TGGGTGAGT	8.73	CTTATCACCTTGCGTTGCAGTCT	7.07	none	CAGAACTGGCCAGGAGGAAGTGACGGTAAGGATTC	16.0575382687461,20.8097645903611	17.1856255354737,23.1049788435961	19.6961457320537,25.8845696817354	21.6121284453409,27.6841972160263	NA	NA	-2.6	0.71163	NA	NA	6.1	0.375742	NA	NA	14.9	0.0182558	18.4337	20.1453	22.7904	24.6482
TSN	MATS_only	ENSG00000211460	NA	51601	chr2	+	122518984	122519100	122513108	122513421	122520580	122520660	6.1	15.2	116	313	80	5563	1480	GCAGTAAGT	9.07	ATGTGCTTATTTTCATGCAGATT	9.14	GAGGCGAGC	0.95	TATTTTCATGTGTTTTTTAGTTG	7.98	none	GAAGCAGTTACAGAAATTCTTGGCAGTAAGTGTCT	15.0956	16.0113	14.0332	14.7459	NA	NA	-1.4	0.977661	NA	NA	6.1	0.291646	NA	NA	15.2	0.00557144	15.0956	16.0113	14.0332	14.7459
HMG20A	both	ENSG00000140382	6289	4472	chr15	+	77740060	77740153	77713015	77713346	77750745	77750838	22.7	24.3	93	331	93	26714	10592	aaggtgatc	4.41	TTTTTATTTTTCGAAAACAGAGT	5.91	CAGGTCAGT	8.94	TTATTCTCTTTTCCTTTCAGAGA	12.06	none	ACACCATcttggttacataatgaaggtgatcaaca	8.6507	11.1395	12.0929	11.3666	-0.24	0.471936	-7.7	0.314135	22.7	0.00135559	6.1	0.0751602	24.3	0.0125268	21.6	2.61e-05	8.6507	11.1395	12.0929	11.3666
PKD2	MATS_only	ENSG00000118762	NA	273	chr4	+	88979134	88979255	88977237	88977419	88983057	88983156	6.1	64.7	121	182	99	1715	3802	TTGGTATGT	7.12	GTTTTGTTTTATTTTTATAGCTT	8.42	TATGTAAGT	6.69	CTCCTTTCATTTACAAACAGAAT	7.27	none	GTTCTTTATGTTCTTCATTCTTTTGGTATGTACAT	5.21165	4.60527	5.05433	4.05811	NA	NA	-28.7	0.243157	NA	NA	6.1	1	NA	NA	64.7	0.0248146	5.21165	4.60527	5.05433	4.05811
SMAD2	both	ENSG00000175387	1636	45453	chr18	-	45396845	45396935	45422891	45423180	45395613	45395807	16.9	19.2	90	289	194	25956	1038	CAGGTGAAT	6.6	GTTTTTCAATTTATGCACAGCAC	4.91	AAGGTAAGT	11	TTCCCCTTGCTTCCCAACAGGTC	12.61	upstream	TTTACAGCTTCTCTGAACAAACCAGGTGAATATTC	9.57686221638629,9.68184149808841,9.60185667135461	7.6135262662217,7.73729063281717,7.67337037025378	7.70902229751081,7.81115578248054,7.74662529600482	5.18877768658989,5.28790698446555,5.24422187311349	-1.31333	0.706777	0.2	0.631177	16.9	0.016645	6.2	0.210789	19.2	0.00384102	5.9	0.168906	9.62019	7.67473	7.7556	5.2403
FAM156A,FAM156B	MATS_only	ENSG00000179304	NA	43751	chrX	+	52929593	52929686	52928493	52928567	52936135	52937587	6.2	15.2	93	74	1452	1026	6449	ACGGTAAGG	10.38	CTCTTTCTCCTTCCGCACAGGAG	9.16	TGGGTGAGT	8.73	CTTATCACCTTGCGTTGCAGTCT	7.07	none	CAGAACTGGCCAGGAGGAAGTGACGGTAAGGATTC	16.0575382687461,20.8097645903611	17.1856255354737,23.1049788435961	19.6961457320537,25.8845696817354	21.6121284453409,27.6841972160263	NA	NA	-2.6	0.714316	NA	NA	6.2	0.37371	NA	NA	15.2	0.0182761	18.4337	20.1453	22.7904	24.6482
MANBAL	MATS_only	ENSG00000101363	NA	15736	chr20	+	35929610	35929816	35918051	35918089	35944710	35945659	6.3	12.6	206	38	949	11521	14894	GCGGTGAGT	10.49	TGACCCTTTGCATTTACAAGTTG	3.27	GAGGTGAGT	10.03	TCCTTTTTATCACCTCACAGGAG	9.05	none	ACCCATTCCCAAGTCCCACGAGGCGGTGAGTTTTT	10.6990646101286,11.7439649101161	13.6529768831553,14.9863644418608	11.6943466640156,12.8364489675964	14.713519958366,16.1504830928642	NA	NA	9.6	0.0449625	NA	NA	6.3	0.215206	NA	NA	12.6	0.0187226	11.2215	14.3197	12.2654	15.432
NUP50	MATS_only	ENSG00000093000	NA	61462	chr22	+	45566868	45567033	45564048	45564127	45567480	45567520	6.3	21.2	165	79	40	2741	447	TGGGCAGGA	-2.63	ATTTTATTCCGACCCTACAGGGT	7.93	GAGGTAAAA	7.3	TAATTTGTATTGTATTGCAGGTG	9.84	none	GCCTTTCGTACAGTGGGCAAGTTGGGCAGGACTCA	27.1843666000955,28.7998113548524	23.1175028270938,25.269707183293	24.88498928601,26.9261517566485	21.9146473087061,23.8169356072922	NA	NA	-5.9	0.81173	NA	NA	6.3	0.27848	NA	NA	21.2	0.0138484	27.9921	24.1936	25.9056	22.8658
KLHL24	MATS_only	ENSG00000114796	NA	45813	chr3	+	183354008	183354099	183353410	183353535	183368083	183368363	6.3	53.3	91	125	280	473	13984	AAGGTGGGG	5.87	GGCGCTGCTTTTTATTTCAGGAA	9.16	GAGGTACCG	8.5	TTTCCTTTTTTTACTTTTAGCCA	9.36	none	GTCCGGGAGGAATGACGGGGTCAAGGTGGGGTCCC	6.4137	4.08406	7.59087	4.32469	NA	NA	-16.5	1	NA	NA	6.3	1	NA	NA	53.3	0.00580299	6.4137	4.08406	7.59087	4.32469
TTC24	MATS_only	ENSG00000187862	NA	8115	chr1	+	156552833	156552962	156552022	156552226	156554668	156554766	6.5	15.1	129	204	98	607	1706	CTGGTAAGC	8.69	GGGGTGGGCTCTGTCCTCAGGCT	7.34	ACGGTGGGT	8.27	TTACTCCACTTCATTCCCAGACT	7.3	none	GCCCTGCAGGCTGCCCGGGACTCTGGTAAGCGTGA	4.69836	5.55321	17.2849	11.6603	NA	NA	-5.1	0.351802	NA	NA	6.5	0.140576	NA	NA	15.1	0.0302423	4.69836	5.55321	17.2849	11.6603
SREBF2	MATS_only	ENSG00000198911	NA	44475	chr22	+	42295240	42295557	42294652	42294785	42296333	42296502	6.6	12.9	317	133	169	455	776	AGAGTGAGT	7.36	TTTATCCACTTTCCTTCCAGCCA	9.08	AGAGTGCGT	3.85	ACTCCCTGTCACTGCTGCAGGAG	8.33	none	GGCGCACAGGAAGGAGCTGAGAAGAGTGAGTATAC	114.664	87.1069	106.386	71.2466	NA	NA	-0.8	0.712106	NA	NA	6.6	0.00890324	NA	NA	12.9	6.04e-05	114.664	87.1069	106.386	71.2466
U2SURP	both	ENSG00000163714	1415	38339	chr3	+	142742816	142742860	142741694	142741906	142745990	142746095	2.1	14.4	44	212	105	910	3130	AAGGTACAT	7.87	TGATGTGACTTCATATACAGACT	5.15	AAGGTAATT	8.83	TAACTGTGTTGTTGTTGTAGGAA	9.13	none	TCAAAGTGGTTATCCCAACAGAAAGGTACATGTTT	14.5455	13.4344	10.1476	9.11012	-3.58	0.0847645	-9.5	0.352525	2.1	0.0126714	6.6	0.124807	14.4	0.189749	17.3	0.0308188	14.5455	13.4344	10.1476	9.11012
WDR20	MATS_only	ENSG00000140153	NA	54259	chr14	+	102661274	102661457	102606229	102606509	102674939	102675189	6.7	16.8	183	280	250	54765	13482	GAAGTAAGT	9.82	TTTTTCTCTTTCTCCTCCAGGCT	12.92	AAGGTACCG	9.67	GTTCTCCTTTGTCTTCACAGAGA	10.26	none	AACTAGCAAACTTTTTAATGAGGAAGTAAGTAGCA	8.19636611512482,12.3245213766904,7.60553718250509,8.95890444583531,8.863300307685,11.4597255899057,8.81236180016957,8.07680810047956,7.89448015524102	6.22838474327481,8.34354293899707,5.72813402916585,6.80783446995251,6.735185280411,7.75808728031744,6.69647731902933,6.13753310196286,5.99898284976014	7.54565854565901,12.1908748626477,7.13696987819857,8.24765913844616,8.15964499023686,11.3354568795708,8.11275047879872,7.43559221355053,7.26773924080899	5.96191521919863,8.0499501708655,5.53488191487301,6.51657429801846,6.44703326504716,7.48509553847732,6.4099813497308,5.87495049152798,5.74232784676874	NA	NA	-6.3	0.255839	NA	NA	6.7	0.437945	NA	NA	16.8	0.00508945	9.13245	6.71491	8.60359	6.44697
PDCD10	MATS_only	ENSG00000114209	NA	47712	chr3	-	167443188	167443261	167452246	167452298	167437849	167438061	6.7	22.8	73	52	212	8985	5127	AAGGTACGT	10.75	TCTGCCTCCCTTTTTCCTAGCTT	8.08	GAGGTGAGG	8.41	CTTTCTTCCTCTTTCACCAGATC	11.76	none	TTTGGCATGAGAAAGCCCTAAAAAGGTACGTAAAC	13.9978773884794,12.4898698237324,15.0893204952737	11.3044803819758,10.0291119378052,12.1855318694034	14.8105867703252,13.2274710416345,15.9700831637888	10.9693009963147,9.76220464386444,11.8287739810695	NA	NA	0.8	0.868008	NA	NA	6.7	0.551981	NA	NA	22.8	0.0358745	13.859	11.173	14.6694	10.8534
FAM3A	MATS_only	ENSG00000071889	NA	60552	chrX	-	153736141	153736192	153736619	153736678	153735736	153735821	6.7	28.8	51	59	85	427	320	GAGGTGAGT	10.03	GCCCCTCCCTCCTGACACAGGGG	8.42	ACGGTGAGG	9.2	CGTGGCACCTGCCCCCCCAGATG	8.66	none	CGGGCCTTTGACATGTGGGCCGGAGGTGAGTTGCA	9.6802495710503,9.36494258367895,9.52811718968087,10.079074453992,9.06657965350973	8.56182662091395,8.28294912520252,8.42727109492761,8.91457263999028,8.01905802823573	13.0263642167908,12.6020669269894,12.8216451344634,13.5630485394197,12.2005706464806	16.0347379819521,15.5124513519154,15.7827400498818,16.6953668688125,15.0182315104044	NA	NA	-18	0.5065	NA	NA	6.7	0.7186	NA	NA	28.8	0.0026984	9.54379	8.44114	12.8427	15.8087
STAG1	MATS_only	ENSG00000118007	NA	48478	chr3	-	136287606	136287703	136323150	136323315	136260960	136261037	6.9	13.4	97	165	77	35447	26569	GAGGTACAG	6.62	TTTATATTTTTTTTCCACAGTCC	10.78	CAGGTAAAT	8.76	TAAAATCTGTTGTTCCACAGGTA	10.43	none	TTTATCCAGTGTTCAGGATGTCGAGGTACAGAATG	8.32476	5.75932	4.81473	3.79885	NA	NA	-3.7	0.0441136	NA	NA	6.9	0.672308	NA	NA	13.4	0.0248504	8.32476	5.75932	4.81473	3.79885
FAM63B	both	ENSG00000128923	537	34009	chr15	+	59123972	59124115	59113915	59114018	59139495	59139669	21.1	19.8	143	103	174	9954	15380	AAGGTATGA	9.11	GTTATGCATTGGTTCTATAGGCT	5.54	AAGGTGGGT	8.23	TTTTGTTACTTCTTATTAAGGGT	6.74	none	TTTTAGCACCATGACCAAATACAAGGTATGATATA	4.78370461607593,4.78658059079501	4.47688462779716,4.47957614160145	4.30524522061553,4.30783354439545	3.42070542270079,3.42276195902706	-2.46	0.249552	3.1	0.704297	21.1	0.0142647	7	0.109904	19.8	0.0153558	-0.2	0.821565	4.78514	4.47823	4.30654	3.42173
ATXN7L2	MATS_only	ENSG00000162650	NA	59219	chr1	+	110034648	110034726	110033637	110034339	110035207	110035356	7.1	41.1	78	702	149	309	481	AAGGTGGGT	8.23	GGCTGTGACCCTCATTCCAGGTA	8.17	AAGGTACCA	7.87	CGCCTCTTGTCTTCCTGCAGTCA	9.81	none	ACAGCCTAACATGCCGAGCAGCAAGGTGGGTGGGC	6.02491	7.28697	8.38978	9.02898	NA	NA	-9.4	0.0844809	NA	NA	7.1	0.609065	NA	NA	41.1	0.0216392	6.02491	7.28697	8.38978	9.02898
PPCDC	MATS_only	ENSG00000138621	NA	47942	chr15	+	75335781	75335877	75320587	75320794	75340893	75341062	7.3	12.3	96	207	169	14987	5016	GAGGTCAGT	7.7	CCCCTTCTTCTTGGTGACAGCTG	7.78	GGGGTGAGT	7.93	TTCCCTGGCCTTCTTCACAGACC	10.01	none	CTACAGCGACGCTGATGAATGGGAGGTCAGTGCTG	3.22195	5.001	3.26007	4.92846	NA	NA	-2.7	0.523255	NA	NA	7.3	0.251512	NA	NA	12.3	0.0492973	3.22195	5.001	3.26007	4.92846
HIPK3	MATS_only	ENSG00000110422	NA	6393	chr11	+	33370067	33370364	33369397	33369559	33370692	33370833	7.4	13.3	297	162	141	508	328	AGAGTAAGT	9.35	AATTATTCCTTTGGTTGCAGGAG	6.98	CAGGTTGGT	8.08	TCCCTTTTCTCTTCCACTAGATG	10.57	none	CTTCCCAGAGACATTCACTCAGAGAGTAAGTGCCA	13.2706579064491,13.0943873080712	12.5769153727536,12.4098595708385	10.8359518712547,10.6920208217314	8.53119537832617,8.4178777926558	NA	NA	-5.2	0.651281	NA	NA	7.4	0.127426	NA	NA	13.3	0.0458667	13.1825	12.4934	10.764	8.47454
HMGCS1	MATS_only	ENSG00000112972	NA	46247	chr5	-	43298110	43298236	43298619	43299077	43297103	43297268	7.4	22.2	126	458	165	383	842	GAGGTAAGT	11.08	TAACAAAAAATATTTTTCAGGAC	6.74	ATGGTATGT	8.35	TTCCTTTTTGGTTCTAATAGGGC	8.56	none	AATGCTCCTTTAATTTTTGAACGAGGTAAGTGCTT	259.348244544037,254.988829607257	68.5607643427352,67.4083184463758	151.856909082346,149.304328559309	54.5530257723763,53.6360375898777	NA	NA	11.7	0.0333202	NA	NA	7.4	0.330268	NA	NA	22.2	0.000471343	257.169	67.9845	150.581	54.0945
PDK1	both	ENSG00000152256	2526	26937	chr2	+	173433468	173433545	173431583	173431661	173435453	173435552	3.6	7.5	77	78	99	1807	1908	AAGGTTTGT	7.81	TTTTCTCTTCTGCTCTGTAGCAA	8	ATGGTAAGC	9.26	ACAACCCTAATGTATTTCAGAAT	6.96	none	TCACATGGTGTTTGAACTTTTCAAGGTTTGTAAAA	14.7333	10.0421	10.0593	6.47758	-6.08	0.418357	-7.9	0.836023	3.6	0.118998	7.4	0.512505	7.5	0.236931	23.8	0.0185355	14.7333	10.0421	10.0593	6.47758
C3orf17	MATS_only	ENSG00000163608	NA	28037	chr3	-	112736294	112736449	112738388	112738491	112732795	112732879	7.5	23.5	155	103	84	1939	3415	CAGGTGAGG	10.07	ATTAGATGTCTCTGCTTCAGACC	5.97	TTGGTGAGT	9.27	AACTGCTCTTCTTCTTTCAGGTT	11.78	none	CAAACCCCATTTGGCCCTCAAACAGGTGAGGAAGC	6.58886	5.78737	7.16607	5.66009	NA	NA	-8	0.587106	NA	NA	7.5	0.172064	NA	NA	23.5	0.00471613	6.58886	5.78737	7.16607	5.66009
C12orf32	MATS_only	ENSG00000171792	NA	52618	chr12	+	2994327	2994700	2986388	2986448	2997076	2997223	7.6	32.5	373	60	147	7879	2376	TGGGTAGGC	6.03	GTTTTGCTTGGTGGTTGTAGGTA	5.69	CTGGTAAGG	9.68	ACTTTTTTTTTTTTTTTAAGGTA	11.8	within	TGACCACAGCACCATCACTTCCTGGGTAGGCCCAT	19.9510591655925,17.2852760745377,17.6789754211378	22.3525656709073,19.3659026014117,19.8069914892963	15.918242237892,13.791308492426,14.1054272324921	19.5324761226457,16.9226224731723,17.3080618136676	NA	NA	-22.6	0.330731	NA	NA	7.6	0.24163	NA	NA	32.5	0.0261773	18.3051	20.5085	14.605	17.9211
NUDT4	MATS_only	ENSG00000173598	NA	40437	chr12	+	93774763	93774807	93772325	93772469	93788384	93788495	7.7	-12.2	44	144	111	2294	13577	TCAGTAAGT	9.14	GCAATTTGACCCCAAAAAAGCTA	-2.03	CGCGTAAGT	9.93	AGTTATGGTTCACCTTACAGGTG	8.36	none	GGCTGTTCCTGTACTGAAGTTCTCAGTAAGTTTCT	11.0901266453524,11.097043564258,13.9956950491746	8.85482749136645,8.86035025279558,11.1357300553095	11.6024660124161,11.6097024777045,14.5883888481897	8.3324661870712,8.33766315142904,10.5037333869546	NA	NA	2.9	1	NA	NA	7.7	1	NA	NA	-12.2	0.0359326	12.061	9.61697	12.6002	9.05795
STYXL1	MATS_only	ENSG00000127952	NA	2339	chr7	-	75630207	75630320	75633075	75633173	75625655	75625917	7.7	12.6	113	98	262	2755	4290	CAGGTATGC	9.37	CCCCCCACTTCTTTTTGCAGAAA	10.3	TTGGTAAGG	8.92	TTCTCTCTTTGTATTCATAGAGG	7.07	none	GCATAGTAACGAGCAGACCTTGCAGGTATGCGTTC	4.54628	6.61444	9.18762	13.6288	NA	NA	-6.2	0.603742	NA	NA	7.7	0.385968	NA	NA	12.6	0.0440882	4.54628	6.61444	9.18762	13.6288
MDH1	MATS_only	ENSG00000014641	NA	1503	chr2	+	63821621	63821720	63815742	63816180	63824532	63824708	7.7	22.1	99	438	176	5441	2812	CAGGTAGGA	9.79	ATGGGTCTTTTTCATTACAGTCT	6.79	ATGGTGAGT	10.13	ATTTATTGCCATGTCCACAGATG	8.45	upstream	TGGATCTGTCTTTGGTAAAGATCAGGTAGGAACAG	42.0409960236554,34.6759527848556,39.2188668788148	36.7102664252628,30.2261414844483,34.2459786444666	31.7645611029238,26.1745862877914,29.6322687659109	29.8200204701967,24.5970030520375,27.8182613106057	NA	NA	-7.3	0.628933	NA	NA	7.7	0.0651902	NA	NA	22.1	0.00801352	38.6453	33.7275	29.1905	27.4118
IVNS1ABP	both	ENSG00000116679	2666	23793	chr1	-	185275616	185275757	185276145	185276271	185274667	185274775	17.6	9.5	141	126	108	388	841	ATGGTGTTT	-2.09	ATTGATTTATCTCCCCATAGGTT	9.93	GAGGTTAGT	7.15	GTTCTGTTGCTGTTTTGCAGGTT	10.32	downstream	GGCAGAGAACGATGATGATTTAATGGTGTTTACTC	23.947	19.2119	24.1787	17.5408	8.52667	0.00219343	3.6	0.480656	17.6	0.0460265	7.8	0.0797917	9.5	0.320178	3.9	0.243576	23.947	19.2119	24.1787	17.5408
LINC01128	MATS_only	ENSG00000228794	NA	40154	chr1	+	783033	783186	763052	763155	787306	787490	7.8	21.1	153	103	184	19878	4120	TGGGTaggt	6.86	ATCTCACTCACTTCTCTCAGTTT	6.75	TAGGTAAGA	9.14	CTTCATTCTTTCTCAAATAGGTT	9.39	none	CGCCATGCGATTCGCCCACTCTTGGGTaggtggag	6.83218	8.16204	9.69914	10.922	NA	NA	-7.7	0.328877	NA	NA	7.8	1	NA	NA	21.1	0.00404661	6.83218	8.16204	9.69914	10.922
SUZ12	MATS_only	ENSG00000178691	NA	58936	chr17	+	30310017	30310123	30303539	30303633	30315338	30315516	7.8	23.7	106	94	178	6384	5215	AAGGTATGG	9.26	TATATGTGTTTGTCTAACAGGCG	9.75	CAGGTAATG	9.43	GCATGTTTTTTATTTTTTAGAGG	8.21	none	ATGGGAGACTATTCTTGATGGGAAGGTATGGACTA	16.8849	13.3557	10.4716	9.56353	NA	NA	-8.6	0.390566	NA	NA	7.8	0.250382	NA	NA	23.7	0.015472	16.8849	13.3557	10.4716	9.56353
BRD1	MATS_only	ENSG00000100425	NA	60084	chr22	-	50181037	50181170	50187681	50187942	50171325	50171461	7.9	11.2	133	261	136	6511	9576	CAGGTAAAT	8.76	CCCAGCCAACTTCTCCTCAGCTA	3.96	AAGGTAAGC	10.22	CCTGCCCGCCTGTGTTCCAGGTC	11.05	none	TCCCCAGGAAAGCGCCTGGACGCAGGTAAATGCCG	16.6696	16.8218	17.9893	16.0943	NA	NA	-2.4	0.511905	NA	NA	7.9	0.548995	NA	NA	11.2	0.0257104	16.6696	16.8218	17.9893	16.0943
BCL2L13	MATS_only	ENSG00000099968	NA	36001	chr22	+	18178906	18178976	18171751	18171908	18209442	18211465	7.9	23.9	70	157	2023	6998	30466	AAGGTATCA	7.22	TTTTAAAAAAATCTCTACAGGCC	6.6	CCAGTGAGT	8.28	CGCTTGTCCTTCGTTTCTAGGGC	11.58	none	AGTTCATGCCAGCGGCTGGAATAAGGTATCATCAC	7.5732	9.5455	10.0788	11.5459	NA	NA	-17.9	0.116258	NA	NA	7.9	0.078523	NA	NA	23.9	0.000231837	7.5732	9.5455	10.0788	11.5459
GOLGB1	both	ENSG00000173230	1122	974	chr3	-	121438492	121438615	121441108	121441225	121437234	121437348	2.5	9.4	123	117	114	2493	1144	CAGGTGTGT	6.99	TCTCTGGTATGTGTCTTCAGTTG	7.06	CAGGTAGGG	9.46	CTAAAATGTTTTCTTCTCAGAAA	7.56	upstream	AGATGTGGAAACAGAGATGCAACAGGTGTGTTGCT	9.44643136003517,9.43550771587217,9.53988467864331,9.47173656057103	6.10996357216491,6.10289814551145,6.17040929506608,6.12633100739707	7.6825825648798,7.67369859642726,7.75858616971268,7.70316274855212	6.09712031450671,6.09006973951217,6.15743897936828,6.11345334508401	-0.986667	0.706214	16.3	0.428706	2.5	0.631119	8	0.39043	9.4	0.35292	14.9	0.0077	9.47339	6.1274	7.70451	6.11452
MCMBP	MATS_only	ENSG00000197771	NA	59944	chr10	-	121595051	121595216	121596407	121596541	121591523	121591612	8	26.2	165	134	89	1191	3439	AAGGTATGT	9.79	TGTACTCCTTCTCTTTTCAGGCA	11.8	CCGGTATGA	8.14	CATTTACTCTTTTGATAAAGGCA	3.86	downstream	TAGCATATCTGATGAAATAACCAAGGTATGTCTAG	12.547334029827,12.5648745713412,13.1485363442838	10.9271761606935,10.942451803043,11.4624412591275	7.59360177215782,7.60421724527826,7.95860955040048	7.07286416392544,7.08275167207632,7.41503150781927	NA	NA	-17.8	0.108751	NA	NA	8	0.100307	NA	NA	26.2	0.00497706	12.7536	11.1107	7.71881	7.19022
UROS	MATS_only	ENSG00000188690	NA	55917	chr10	-	127482590	127482957	127483448	127483547	127477293	127477574	8.1	10.6	367	99	281	491	5016	gtggtgggt	4.29	AACTCTTGTGTCTGTAATAGAAA	6.91	AAGGTAAGT	11	TTTCTCTTCTGTCTTTATAGTTT	10.29	none	atacaattctcacaccagtccagtggtgggtatcc	16.2219	20.805	25.4801	29.5099	NA	NA	1.1	0.853637	NA	NA	8.1	0.0492	NA	NA	10.6	0.0277378	16.2219	20.805	25.4801	29.5099
NGLY1	MATS_only	ENSG00000151092	NA	47162	chr3	-	25778824	25778946	25792588	25792754	25775362	25775473	8.1	13.9	122	166	111	13642	3351	caggtacag	8.68	TTTTTTTCTTTTTAAACCAGATA	7.86	AAGGTAGTA	5.69	TATTCTGTTATTTGTTTCAGGTA	10.65	none	GCTCGCTATGTTTGGGATTAcacaggtacagaatg	24.8121147569453,25.8787791663713,25.3406568464423,26.6439506867405	19.7055898856909,21.0082854576008,20.1253539305932,21.1604198316275	28.0141361217511,29.0296057040241,28.6108869503801,30.0823718039044	19.8756065232109,21.0606815548035,20.2989922242971,21.3429885062601	NA	NA	-4.3	0.400113	NA	NA	8.1	0.20529	NA	NA	13.9	0.0489662	25.6689	20.4999	28.9343	20.6446
BAX	MATS_only	ENSG00000087088	NA	35322	chr19	+	49458943	49459090	49458136	49458219	49459454	49459590	8.1	16.9	147	83	136	724	364	GAGGTGTGG	4.48	TCACTCCATCCCCACTCTAGTTT	6.94	ggggtgagg	5.5	GGTTCTCCTCTCTCCTGCAGGAT	11.57	none	TGGACAGTAACATGGAGCTGCAGAGGTGTGGGCCC	19.9923056773488,23.2489708555594,15.6158483993791,16.9758454595109,19.0297131817727	26.0885357397387,30.3382519688365,19.8629790887023,22.1522698847341,24.8324210559735	27.6368469767123,32.1387768009731,22.1974509878272,23.466970285292,26.3061839741298	38.3490989391963,44.5960109835902,29.1897321335821,32.5629463459475,36.5026608421239	NA	NA	-2.4	0.530755	NA	NA	8.1	0.522859	NA	NA	16.9	0.00641154	18.9725	24.6549	26.3492	36.2401
BAX	MATS_only	ENSG00000087088	NA	35320	chr19	+	49458804	49459090	49458153	49458219	49459454	49459590	8.2	16.9	286	66	136	585	364	GAGGTGTGG	4.48	TCCCTTCCTTTCTCCTCTAGGGC	13.75	ggggtgagg	5.5	GGTTCTCCTCTCTCCTGCAGGAT	11.57	none	TGGACAGTAACATGGAGCTGCAGAGGTGTGGGCCC	19.9923056773488,23.2489708555594,15.6158483993791,16.9758454595109,19.0297131817727	26.0885357397387,30.3382519688365,19.8629790887023,22.1522698847341,24.8324210559735	27.6368469767123,32.1387768009731,22.1974509878272,23.466970285292,26.3061839741298	38.3490989391963,44.5960109835902,29.1897321335821,32.5629463459475,36.5026608421239	NA	NA	-3.1	0.519542	NA	NA	8.2	0.459708	NA	NA	16.9	0.0109726	18.9725	24.6549	26.3492	36.2401
ARHGAP17	both	ENSG00000140750	2857	9841	chr16	-	24950684	24950918	24953307	24953464	24946790	24946960	16.1	1.9	234	157	170	2389	3724	CAGGTAAGG	11.08	TGTTTCTTCTCTCTGTGTAGCTT	10.18	AAGGTATGA	9.11	TTGACTTTTACTCCTCTTAGTCC	6.02	none	AGGGGCCGAGCCCAGGCGACGGCAGGTAAGGAGGC	11.0135094849344,10.2725200601286	10.4019318607647,9.7020894066477	13.0076054202959,12.1324531292236	10.7814644610131,10.0560870360916	-8	2.04e-06	-0.3	0.913727	16.1	0.0148578	8.3	0.833458	1.9	0.380572	-2.4	0.80936	10.643	10.052	12.57	10.4188
EYA3	both	ENSG00000158161	1000	7880	chr1	-	28354299	28354437	28362054	28362191	28343664	28343750	4	22.8	138	137	86	7617	10549	AAGGTAAAT	8.88	GTCCAATTTATCTGATTCAGGTG	7.38	TTGGTAAGG	8.92	TAACCCCATCAATCCTCTAGCTT	4.32	none	GCACATTATTCTTATCCCATTCAAGGTAAATAGGC	4.31984	4.16122	4.52983	4.17478	12.4933	0.00170535	10.6	0.22434	4	0.64328	8.3	0.0665198	22.8	0.0265999	5.5	0.340476	4.31984	4.16122	4.52983	4.17478
GNAS	both	ENSG00000087460	1875	31309	chr20	+	57473995	57474040	57470666	57470739	57478582	57478640	13.3	33.2	45	73	58	3256	4542	TGGGTAGGC	6.03	TTTCAATCTCTCTTTAAAAGGGG	6.81	AGAGTAAGT	9.35	TTTTCTTTTCAATCCCACTGCAG	0.64	within_and_downstream	AGGCTGCAAGGAGCAACAGCGATGGGTAGGCACAT	200.719486073002,261.349350960894,310.300757992936,135.245957501878,267.655367472014,135.245957501878,268.086605980294,261.760493096647	192.255098808531,248.030764286554,296.447008709584,129.671996447433,254.01542079749,129.671996447433,254.42468302219,248.420954267078	146.197974574251,189.022165546685,226.424513248105,98.7533309276743,193.583022088025,98.7533309276743,193.894917397512,189.319526058819	176.947244385191,228.473153066611,274.164538639642,119.687943772873,233.985910111113,119.687943772873,234.362901373376,228.83257596079	-4.12667	0.579991	7.7	0.654744	13.3	0.0593145	8.4	0.0346571	33.2	0.00716468	5.9	0.142936	230.045	219.117	166.994	202.018
SEC22A	MATS_only	ENSG00000121542	NA	25812	chr3	+	122928045	122928246	122920775	122920833	122942405	122942569	8.4	13.5	201	58	164	7212	14159	TAAGTAAGA	5.17	AATTGTTCATTTTGTTTTAGGTC	10.57	CAGGTACTC	7.04	CAATGTTTTTTACACTGTAGTTT	4.68	none	TGAAAACTGGACATTATAACATTAAGTAAGACTTC	3.66242	3.61205	3.69523	3.49291	NA	NA	-1.7	0.612785	NA	NA	8.4	0.22594	NA	NA	13.5	0.0223334	3.66242	3.61205	3.69523	3.49291
KDM6A	both	ENSG00000147050	2297	33400	chrX	+	44919853	44920009	44919301	44919401	44920568	44920664	50.7	53.7	156	100	96	452	559	AAGGTATAT	7.84	CTTCCTTCTGTGATTCTTAGGCA	8.71	CAGGTGAGA	9.22	TTTAAATCGATTTTCCTCAGAAT	6.23	within_and_downstream	GAAAAGAACATCTAGTCCAACAAAGGTATATGTTT	6.94697	5.06008	5.54775	3.22288	-9.40667	0.00179659	-22.2	0.326109	50.7	0.00206918	8.4	0.10897	53.7	0.00218997	35.6	1	6.94697	5.06008	5.54775	3.22288
RWDD2B	MATS_only	ENSG00000156253	NA	38961	chr21	-	30380081	30380444	30380715	30380942	30378079	30378972	8.5	19.9	363	227	893	271	1109	AAGGTTTGC	5.42	TCTTGTATCTTTTCTATTAGATC	8.07	ATGGTAATT	6.49	CTTTGGAAATTTCTTTTCAGACT	6.65	none	GTGCCTGTGAAGAATTCTGGTCAAGGTTTGCTTTT	1.53312	2.3759	2.61445	3.82853	NA	NA	-11.3	0.265417	NA	NA	8.5	0.0970747	NA	NA	19.9	0.00206595	1.53312	2.3759	2.61445	3.82853
ZC3H8	MATS_only	ENSG00000144161	NA	16903	chr2	-	112997944	112998069	113007767	113007849	112995891	112996105	8.5	23.6	125	82	214	9698	1839	AAGGTAAAC	8.14	ATTTTAATATTTTGATTCAGATG	8.3	AAAGTAAGA	6.91	AAGTTTTAATTTTTACTTAGTTT	3.03	none	AATAAAATTAAAGGCCAAAACCAAGGTAAACATAA	9.99836	10.3036	11.4587	8.18848	NA	NA	-9.1	0.672941	NA	NA	8.5	0.176988	NA	NA	23.6	0.0021969	9.99836	10.3036	11.4587	8.18848
ZFYVE19	MATS_only	ENSG00000166140	NA	31467	chr15	+	41104896	41105100	41102846	41102955	41105535	41105615	8.6	10.4	204	109	80	1941	435	GAGGTGAAG	4.41	GATGGCATTACCCCTTCCAGCTG	5.46	CAGGTAACC	8.66	CCCATGTCTCCCTCTTCAAGTGA	7.2	none	CTGCGGGGACAGGACCCCGAGAGAGGTGAAGGCTG	12.5834	12.9138	12.1821	12.9854	NA	NA	14.6	0.259972	NA	NA	8.6	0.22073	NA	NA	10.4	0.0370047	12.5834	12.9138	12.1821	12.9854
AGAP3	MATS_only	ENSG00000133612	NA	548	chr7	+	150817606	150817832	150817073	150817232	150820880	150820937	8.6	16	226	159	57	374	3048	CAGGTTTGT	7.44	gaccccctttgattcaacagcta	6.83	ACGGTACGT	11.34	CCTCTTGTTTTCTCTTCCAGTCT	10.83	downstream	ACGCTGCCTCGTTCCTCCCTCTCAGGTTTGTCCTG	7.39395884463626,10.8566007911357	10.9300020771515,13.8275086161624	9.02247779221929,13.5067175223483	12.0313817649555,15.9018178833769	NA	NA	-1.4	0.893433	NA	NA	8.6	0.0330109	NA	NA	16	0.00564844	9.12528	12.3788	11.2646	13.9666
CDK5RAP2	both	ENSG00000136861	1045	11476	chr9	-	123222849	123222945	123230137	123230275	123220727	123220900	52	62.1	96	138	173	7192	1949	GAGGTAGGA	8.24	CCATTCCATGCTCCATGTAGCTT	5.09	GAGGTAAGA	10.06	CCAAATACTTTTATTTGCAGATT	7.3	none	CCAGCATTTGCAGCAGAGTAATGAGGTAGGAACCT	30.2132288595431,31.4080453520697	22.3368283509357,23.2201636286216	19.5946360560788,20.3695282211532	16.8953224725146,17.5634672123754	7.37333	0.180879	1.7	0.866796	52	0.00692457	8.6	0.338211	62.1	0.00399584	22.1	0.00109028	30.8106	22.7785	19.9821	17.2294
AHSA2	MATS_only	ENSG00000173209	NA	16820	chr2	+	61410681	61410797	61408454	61408540	61411846	61411935	8.9	13	116	86	89	2141	1049	CGGGTAAAG	6.23	TCTATTTTTCTGATTTGTAGGTC	9.06	GAGGTATGT	9.81	CTTCCCTTGTTTCTTTATAGAAT	11.15	none	GATTACCTGAAGGCACTTAAGACGGGTAAAGAAGG	45.5645	36.8716	44.0601	37.7675	NA	NA	-4.6	0.498969	NA	NA	8.9	0.0175856	NA	NA	13	0.0065463	45.5645	36.8716	44.0601	37.7675
KIAA0748	MATS_only	ENSG00000135426	NA	30835	chr12	-	55377777	55377950	55378368	55378530	55368203	55368391	8.9	25.5	173	162	188	418	9386	GAGGTAAGG	10.28	GTTTCCCGGTTTCATTTCAGGCC	9.24	CAGGTAAGC	9.88	CACTGTTTTTCAACTCTTAGGAC	8.33	none	GGGAGGATGTACACACTTGAGTGAGGTAAGGTCAA	16.9107515470319,17.7030958540978	14.4211201114045,15.1358500258746	39.4824544419823,40.5001209034674	34.5475410905317,36.2293846628259	NA	NA	-8.5	0.496412	NA	NA	8.9	0.0386251	NA	NA	25.5	0.0161901	17.3069	14.7785	39.9913	35.3885
ADARB1	both	ENSG00000197381	6869	37648	chr21	+	46554629	46554747	46548316	46548488	46591524	46591599	8.1	9.9	118	172	75	6141	36777	CAGGTCAGT	8.94	tttttttttttttacacaagatg	4.28	AAGGTGAGT	10.47	ATTTTCTTACTGTCTTTCAGACA	10.31	none	AGGATGAAGACGCCTTGCCAGCCAGGTCAGTGGGT	12.5802759398606,8.99397749978741,8.840387447137,17.9127458451648,17.31365735536,15.5187116140474,12.2866698162642	9.30753177203716,6.65420470396981,6.54057092504902,13.2527658276585,12.8095295123521,11.4815368199649,9.09030694033218	25.4903377948969,18.2237278168815,17.9125214218302,36.2950657529414,35.0811839551841,31.4442388286787,24.8954288036394	16.0148385754208,11.4494386688038,11.2539167333753,22.8031352034106,22.0404885410892,19.7555015951606,15.6410745422128	-1.38	0.22053	-4.8	0.893122	8.1	0.0281991	8.9	0.0931705	9.9	0.00954857	25.8	0.00977851	13.3495	9.87664	27.0489	16.9941
CDK5RAP2	MATS_only	ENSG00000136861	NA	10133	chr9	-	123222849	123223025	123230137	123230275	123220727	123220900	8.9	39.8	176	138	173	7112	1949	GAGGTAGGA	8.24	TTTGCATTAAAAAAAAAAAGACA	-4.65	GAGGTAAGA	10.06	CCAAATACTTTTATTTGCAGATT	7.3	none	CCAGCATTTGCAGCAGAGTAATGAGGTAGGAACCT	30.2132288595431,31.4080453520697	22.3368283509357,23.2201636286216	19.5946360560788,20.3695282211532	16.8953224725146,17.5634672123754	NA	NA	-1.3	0.800982	NA	NA	8.9	0.331761	NA	NA	39.8	0.000988042	30.8106	22.7785	19.9821	17.2294
POLA1	MATS_only	ENSG00000101868	NA	57933	chrX	+	24721367	24721464	24717541	24717666	24722505	24722586	9	11.5	97	125	81	3701	1041	ATGGTAGGT	8.6	TGAAACTTGTATAATGGTAGGTC	4.41	GAAGTAAGT	9.82	ATTAAATTTTGTCCCTGCAGATG	10.87	none	GATGATGACTGGATTGTGGATGATGGTAGGTGGGG	9.8129	6.45001	5.56036	3.63427	NA	NA	-0.9	0.682865	NA	NA	9	0.0787825	NA	NA	11.5	0.0363292	9.8129	6.45001	5.56036	3.63427
ZFAND3	both	ENSG00000156639	2649	62314	chr6	+	38050167	38050233	38029368	38029551	38084347	38084515	17.6	14.1	66	183	168	20616	34114	CAGGTATGT	9.8	ACCTGCCTTTCTGTTTCTAGGTG	13.51	AGTGTAAGT	8.46	AAATATGTTGTTTTGGTCAGATT	5.27	none	CCAACAAAAAGATCCTGTGGTACAGGTATGTACGT	16.7042	10.6075	16.9295	11.9028	5.43333	0.151667	5.3	0.51922	17.6	0.0223293	9.1	0.0662651	14.1	0.159342	1.8	0.532685	16.7042	10.6075	16.9295	11.9028
LRR1	both	ENSG00000165501	288	60008	chr14	+	50074117	50074839	50069087	50069186	50080973	50081389	12.4	10.3	722	99	416	4931	6134	TAGGTAAGA	9.14	TACAACTTTTATTTATTCAGGCC	7.4	AAGGTATGG	9.26	TTTATCATTCTTTCCAATAGGAT	10.86	none	CTGCACGAACCATATTACATAATAGGTAAGATTTT	16.9503996277429,15.0526449620414,28.9134382701968,15.9624648410207	12.8787279056964,11.4368347050586,21.9681135830305,12.1281058798922	7.98476076445127,7.09079263815138,13.620144216977,7.51937805394898	7.20701351677976,6.400121418209,12.2934883546243,6.78696092109049	24.2267	2.49e-13	21.4	0.123686	12.4	0.0265241	9.1	0.230156	10.3	0.116841	24	0.157807	19.2197	14.6029	9.05377	8.1719
CEP63	MATS_only	ENSG00000182923	NA	23674	chr3	+	134266176	134266314	134264990	134265130	134267903	134268018	9.2	10.7	138	140	115	1046	1589	CAGGTACAT	7.79	CATCCTATGTCTTTCCATAGGCC	11.36	AAGGTAAAT	8.88	ATCTTATTTTTGTCATACAGTTT	7.18	none	CAGAGGTGACTTGTCTTGAAGGCAGGTACATAATT	11.67616534647,9.7815847345668,11.2568171155781,33.7725350947342	8.09485386654785,6.65034697630627,7.64278690420096,23.5000810410055	10.2425679587689,8.49414979596655,9.79536934713338,29.6176042605654	7.15686158496919,5.81142315376132,6.68022370351173,20.6444480022234	NA	NA	-9.8	0.339143	NA	NA	9.2	0.141336	NA	NA	10.7	0.0181579	16.6218	11.472	14.5374	10.0732
BID	MATS_only	ENSG00000015475	NA	33537	chr22	-	18226568	18226779	18257146	18257258	18222114	18222254	9.2	11.9	211	112	140	30367	4314	CAGGTAGGC	9.88	TGACTCCCCTTTCCCCTCAGGTC	12.37	GTGGTGAGT	8.95	CCGCCCCTGCCTGAACACAGATT	4.87	none	TCCCGCTTGGGAAGAATAGAGGCAGGTAGGCGGCC	25.8461957479147,26.6952026471893,22.4660650652477,28.5866717794775,26.9369810857898,25.2868712687038,29.6288941881043	20.7844726477933,21.467209900419,18.0721612375166,22.9882534159764,21.662152718558,20.3412753160431,23.8263668217672	18.7964517858796,19.4138856784238,16.3527872967651,20.7894424023724,19.5885371120838,18.4060193031954,21.5473908232922	20.2274380277106,20.8918775687428,17.6212947890621,22.3721563311512,21.0825540349583,19.8337987371078,23.1878078640578	NA	NA	11.2	0.361439	NA	NA	9.2	0.104019	NA	NA	11.9	0.0446104	26.4924	21.306	19.2706	20.7453
KIAA0141	MATS_only	ENSG00000081791	NA	11136	chr5	+	141316762	141316922	141314058	141314151	141318085	141318325	9.2	55.2	160	93	240	2611	1163	CAGGTACAG	8.68	TCTGTCCATTTTCTCCTTAGGAC	12.09	GGGGTATGC	6.16	GCTCTCACCTCTTCTTGTAGCCC	7.57	none	GCCCTCTTTTCCATGGGGGCTGCAGGTACAGACCC	2.92262433928082,3.47908078611148	2.98610920720847,3.5546529290131	3.35736106902182,3.9965897191381	3.67742970527387,4.37759819417716	NA	NA	-48	0.252752	NA	NA	9.2	0.123849	NA	NA	55.2	0.0195618	3.20085	3.27038	3.67698	4.02751
DMXL2	MATS_only	ENSG00000104093	NA	12246	chr15	-	51745746	51745838	51747347	51747425	51742391	51742543	9.3	15.1	92	78	152	1509	3203	TAGGTAGGT	7.92	TTGCACTTTGTTTTTCGTAGAGT	8.2	ATGGTAAGT	11.01	CTGATGTTTTTCTTCTTCAGGTT	12.02	none	CATCTGGACACTCCAATGACAATAGGTAGGTTGAC	5.32527330607186,6.49661277291156,5.32678102784594	4.33718976916903,5.2911918005781,4.33841773909235	4.98308478606151,6.07915695758126,4.98449562546867	3.30758345698916,4.03511476296365,3.30851991889658	NA	NA	-3.3	1	NA	NA	9.3	1	NA	NA	15.1	0.0111506	5.71622	4.6556	5.34891	3.55041
FOXN3	both	ENSG00000053254	2659	73243	chr14	-	89656730	89656793	89747293	89747358	89647044	89647150	21.2	15.7	63	65	106	90500	9580	CAGGTTGTG	-0.3	TTATTGGTTGATTTTTCCAGATC	7.38	AAGGTAGGT	10.29	TCTCCCCTTTGCTTTTTCAGTTC	11.89	none	AATACTCCCCCTGAGATACAAGCAGGTTGTGAGTA	19.0561305248013,17.1970758146091	11.8880263231681,10.7944990245882	14.5933613140629,13.0604728032752	9.11074331619855,8.29085292624978	4.34	0.172018	11.1	0.124907	21.2	0.0284137	9.4	0.162595	15.7	0.119956	19	0.0855078	18.1266	11.3413	13.8269	8.7008
NUP50	MATS_only	ENSG00000093000	NA	61465	chr22	+	45566868	45567024	45564048	45564127	45567480	45567564	9.4	24	156	79	84	2741	456	TGGGCAAGT	2.48	ATTTTATTCCGACCCTACAGGGT	7.93	GAGGTAAAA	7.3	TAATTTGTATTGTATTGCAGGTG	9.84	none	GCCTCCGTGGCCTTTCGTACAGTGGGCAAGTTGGG	27.1843666000955,28.7998113548524	23.1175028270938,25.269707183293	24.88498928601,26.9261517566485	21.9146473087061,23.8169356072922	NA	NA	-5.9	0.675841	NA	NA	9.4	0.423045	NA	NA	24	0.0262195	27.9921	24.1936	25.9056	22.8658
TM7SF3	MATS_only	ENSG00000064115	NA	45036	chr12	-	27128428	27128591	27148169	27148201	27126127	27127160	9.7	17.1	163	32	1033	19578	1268	ATGGTAAGA	9.48	ACTCTTCCACTCTTCCACAGCTG	9.94	AAGGTAAAT	8.88	CTTTTTCTACTGTTTTTTAGACT	9.55	none	ACAAATGTGCCTTTTCAAACTAATGGTAAGACTCT	40.3053	34.4321	23.0431	20.9378	NA	NA	3.3	0.690211	NA	NA	9.7	0.0208271	NA	NA	17.1	0.00899834	40.3053	34.4321	23.0431	20.9378
NUP50	MATS_only	ENSG00000093000	NA	61464	chr22	+	45566868	45567058	45564048	45564127	45567480	45567564	9.7	27.5	190	79	84	2741	422	TGTGTATGT	3.3	ATTTTATTCCGACCCTACAGGGT	7.93	GAGGTAAAA	7.3	TAATTTGTATTGTATTGCAGGTG	9.84	none	GCAGGACTCATCTTAAAAATCATGTGTATGTTATA	27.1843666000955,28.7998113548524	23.1175028270938,25.269707183293	24.88498928601,26.9261517566485	21.9146473087061,23.8169356072922	NA	NA	-4.9	0.728036	NA	NA	9.7	0.490622	NA	NA	27.5	0.00894562	27.9921	24.1936	25.9056	22.8658
LIAS	both	ENSG00000121897	654	49902	chr4	+	39469137	39469266	39466904	39466962	39471638	39471784	14.6	8.3	129	58	146	2175	2372	GAGGTGAAT	5.37	ATTCTCTCTTTTCCCCTTAGGAA	12.14	AAGGTACTT	8.4	ACAGTCCTGCTGTTTTCCAGTAA	6.26	downstream	TAGAAACAGTCCCGGAATTACAGAGGTGAATACGT	3.1514419916972,2.94718186260572	2.92205550796324,2.73266302133599	2.77002312001023,2.59048458445401	2.34595976122105,2.1939068137345	0.353333	0.860724	-11.4	0.214815	14.6	0.0125857	9.9	0.153972	8.3	0.0259262	4.9	0.635813	3.04931	2.82736	2.68025	2.26993
AGAP2	MATS_only	ENSG00000135439	NA	30176	chr12	-	58129151	58129210	58135694	58135940	58128101	58128187	9.9	11.2	59	246	86	6484	964	CTGGTAGGT	8.37	CTGCCCTTCTCCCGTTACAGAGG	9.73	GAGGTAAGA	10.06	CTTCCAACTCTTCTGGACAGGTG	8.69	none	CCGCTCCATTCCTGAACTGCGCCTGGTAGGTAACC	4.53854760736813,6.19749418264719	6.38278341074669,8.83459733301787	13.9359847266195,19.2821071505409	16.2109313173933,21.9132539385831	NA	NA	7.7	0.0396194	NA	NA	9.9	0.110096	NA	NA	11.2	0.0139608	5.36802	7.60869	16.609	19.0621
APBB2	MATS_only	ENSG00000163697	NA	55722	chr4	-	41035252	41035321	41102655	41102767	41015599	41016415	10.1	-5.6	69	112	816	67334	18837	CAGGTCAGA	7.41	AAATGATCCCTTCTTTTTAGATT	7.58	AAAGTAAGT	9.72	ATGACTTTTTTTTTCCCCAGCTG	9.58	none	TGATCCATGTCAGAAGTACTTCCAGGTCAGATACA	2.41506195800027,2.39729623249559,2.39649490784963	2.91494734198189,2.89350434994324,2.89253716185969	1.48649034138817,1.47555539237662,1.47506217051845	1.51393100712772,1.5027941985599,1.50229187180829	NA	NA	0.3	0.899508	NA	NA	10.1	0.0367822	NA	NA	-5.6	1	2.40295	2.90033	1.47904	1.50634
NUCB2	both	ENSG00000070081	6061	69944	chr11	+	17336932	17337022	17333574	17333667	17351673	17351844	6.6	2.7	90	93	171	3265	14651	GAGGTAATA	7.96	ATACATTTTGTTTTAATCAGGTT	7.81	GAGGTATGT	9.81	CCTCATTTTTTTTCTTTTAGACA	9.22	none	ATTCTTGGAGCCAGATAGCTGGGAGGTAATAGAAC	153.119	117.696	91.9645	83.5943	9.31333	0.00124573	6	0.23587	6.6	0.0191027	10.1	0.0231795	2.7	0.653441	4.2	0.25789	153.119	117.696	91.9645	83.5943
PLK1S1	MATS_only	ENSG00000088970	NA	27761	chr20	+	21126205	21126295	21106694	21106845	21142511	21143148	10.1	11.1	90	151	637	19360	16216	AAGGTAATA	8.49	CAAACTTTCTTTATATTTAGCTC	6.88	CAGGTAAGG	11.08	CATCTCTTTTGGTGTTGCAGGTT	9.64	none	ACTGACAGATGAAGACAGAGAAAAGGTAATAAACT	15.6951810889591,17.7367650558005,16.9523381000158	14.4793554218849,16.3627882865311,15.6391268881096	17.1665208901204,19.3994925020487,18.5415296886903	14.7292952241861,16.6452395386946,15.9090864387032	NA	NA	6.4	0.34869	NA	NA	10.1	0.385831	NA	NA	11.1	0.0471366	16.7948	15.4938	18.3692	15.7612
ADPGK	MATS_only	ENSG00000159322	NA	62889	chr15	-	73047896	73047995	73052747	73052868	73044963	73045236	10.2	-14	99	121	273	4752	2660	CAGGTAACC	8.66	TTATCTTCTTCTCTTTGCAGGTT	13.23	CAGGTAAGG	11.08	CCTGTTGTTGTTTTTGTTAGCAG	4.46	none	GCTCATGAGCAGCATTGTCCATCAGGTAACCTCAT	18.3774492154987,15.0692431698515,16.3235412531569	20.8987198183778,17.1366486822413,18.5630285842801	20.1256634947535,16.5027536520832,17.8763708962777	22.1426514338511,18.1566546569782,19.6679354080279	NA	NA	4.2	0.374797	NA	NA	10.2	0.0188414	NA	NA	-14	0.499506	16.5901	18.8661	18.1683	19.9891
SKA2	MATS_only	ENSG00000182628	NA	42983	chr17	-	57196679	57196856	57232491	57232800	57187307	57189706	10.2	-10	177	309	2399	35635	6973	GAGGTAATG	8.73	TCACTTTTTTCCTGACATAGAAA	6.92	ATGGTGAGT	10.13	TTTTATCATTTATTTTCTAGCTG	9.27	none	ACTACAGAAGCAAACAGACCTGGAGGTAATGCTTT	20.9302439036019,20.9161589480813	21.9978088527205,21.9830054820255	16.1212776413863,16.110428867738	17.3896113934294,17.3779090977406	NA	NA	10.8	0.0260168	NA	NA	10.2	0.0380096	NA	NA	-10	0.173561	20.9232	21.9904	16.1159	17.3838
HPS4	MATS_only	ENSG00000100099	NA	35145	chr22	-	26867178	26867254	26868267	26868384	26866684	26866779	10.2	1	76	117	95	1013	399	AGGGTAGGT	8.1	TTTTATGTGATGGAATAGAGTCA	-14.77	AAAGTAACA	1.87	ATGCCTCTTGCCCTGCACAGGTG	9.59	none	CTTCAGAAGGAAAGTGGAGGATAGGGTAGGTGGGT	23.2078093416014,22.5051765698368	18.1513799203698,17.7770631690919	17.0393402925444,16.2524553780436	12.9482345892506,12.3906978648111	NA	NA	1.4	0.318093	NA	NA	10.2	0.0246411	NA	NA	1	0.829618	22.8565	17.9642	16.6459	12.6695
PLK1S1	MATS_only	ENSG00000088970	NA	27757	chr20	+	21186129	21186222	21143731	21143800	21195172	21195338	10.2	13.3	93	69	166	42329	8950	GAGGTAGGT	9.65	GTCCTGTTTCTGTTTTATAGACC	9.79	AGAGTAAGC	6.31	CTTTTTTTGAAACACTGTAGGCA	6.24	none	ACATGATAATTCTGTCAAAGAAGAGGTAGGTAGCT	15.6951810889591,17.7367650558005,16.9523381000158	14.4793554218849,16.3627882865311,15.6391268881096	17.1665208901204,19.3994925020487,18.5415296886903	14.7292952241861,16.6452395386946,15.9090864387032	NA	NA	-3.1	0.534281	NA	NA	10.2	0.170335	NA	NA	13.3	0.0478844	16.7948	15.4938	18.3692	15.7612
POP5	MATS_only	ENSG00000167272	NA	18969	chr12	-	121017576	121017726	121018917	121019139	121017316	121017400	10.2	14.8	150	222	84	1191	176	GAGGTAGGA	8.24	ATTTTTCTTTCCTGTTGTAGTTC	9.24	CGGGTGCAA	-2.32	CACAGTAACTCATATGCCAGGTA	2.18	none	TTTTTCAACACATTACATGTGGGAGGTAGGAGTGA	27.1364045882427,22.1653693688156	33.9119373064606,27.6997129065318	30.0872045244875,24.5756212615324	37.7121941126047,30.8038122550887	NA	NA	-4.6	0.270873	NA	NA	10.2	0.0905544	NA	NA	14.8	0.0077211	24.6509	30.8058	27.3314	34.258
FGFR1OP	MATS_only	ENSG00000213066	NA	62857	chr6	+	167424300	167424381	167413547	167413601	167435896	167436123	10.2	17.7	81	54	227	10699	11515	AAGGTGAGT	10.47	tttaaactaaaatattttaGGGT	6.98	GAGGTATGA	8.55	CTCTTTCCCTCTCTTTCTAGAAG	11.84	none	AAGTGCACAGACAACACCAAGTAAGGTGAGTTAGC	34.1781383534147,33.0902400503882	22.0421850339879,21.340577022296	22.3439493021377,21.6327360617513	12.7018590841276,12.2975558772058	NA	NA	-5.2	0.343101	NA	NA	10.2	0.18063	NA	NA	17.7	0.0252922	33.6342	21.6914	21.9883	12.4997
SREK1IP1	MATS_only	ENSG00000153006	NA	2710	chr5	-	64060871	64060948	64064331	64064454	64036962	64037027	10.2	NA	77	123	65	3383	23844	AACGTATGT	7.69	ACTGCTTTTCCCATTCACAGTTG	9.33	CAGGTAAGG	11.08	TTTTTGTTTGTTTCACTTAGCTG	6.56	none	GAGCTGAACTGGCACAAGTGGCAACGTATGTTACT	3.10792	2.96622	3.07739	3.31995	NA	NA	0.7	0.687451	NA	NA	10.2	0.0371057	NA	NA	NA	NA	3.10792	2.96622	3.07739	3.31995
FAM193B	MATS_only	ENSG00000146067	NA	2407	chr5	-	176974168	176974229	176980168	176980267	176965905	176966148	10.3	-3.6	61	99	243	5939	8020	caggtactt	8.17	TTCCCTGTCATTTCTTCCAGGGC	11.82	CATGTGAGT	7.83	TGTTTCTGTCTGTTGGACAGGTC	9.16	none	ctactttgtgccaggcccaggccaggtactttaca	27.9170404231955,43.606190173223	21.1441088421278,33.0269261080798	37.6861270941046,58.8654241297143	28.5290924363915,44.5622104418026	NA	NA	12.1	0.181356	NA	NA	10.3	0.0223173	NA	NA	-3.6	0.518989	35.7616	27.0855	48.2758	36.5457
COQ3	MATS_only	ENSG00000132423	NA	61904	chr6	-	99831573	99831700	99841949	99842067	99828064	99828217	10.3	-2.1	127	118	153	10249	3356	CAGGTGGGT	8.56	TATTTAATTTTTTTTTTCAGTTT	9.69	CGGGTGAGT	9.89	TCTTCATTTTCACCTTTTAGGTA	11.42	none	GTTTGAACAGAATAAAGAGTTTCAGGTGGGTTTAT	3.29962	2.88879	1.90152	1.85733	NA	NA	-37.6	0.231304	NA	NA	10.3	0.0380385	NA	NA	-2.1	1	3.29962	2.88879	1.90152	1.85733
SIK3	MATS_only	ENSG00000160584	NA	21717	chr11	-	116824759	116824823	116827663	116827780	116797934	116798096	10.3	9	64	117	162	2840	26663	TTGGTAAGT	10.47	CTTTCCTGCCTTTGCACCAGGTT	9.18	CAGGTAGGA	9.79	TGTATTCTTCTTCAACACAGACC	6.54	none	TATGCTAGTGGAGGGGAAATATTTGGTAAGTACAT	4.28546	4.2427	4.25207	3.2745	NA	NA	6.8	1	NA	NA	10.3	0.048781	NA	NA	9	1	4.28546	4.2427	4.25207	3.2745
MORF4L2	MATS_only	ENSG00000123562	NA	28416	chrX	-	102933426	102933548	102940098	102940188	102931753	102931979	10.3	11.1	122	90	226	6550	1447	TGTGTAAGT	7.65	AAAGTTCATCTTCATTGCAGATA	7.13	tgggtaagt	10.24	AAATATTTTATATATTACAGTGG	4.68	none	TTGGAAGGGAAAGAAGGAAGATTGTGTAAGTCAAA	63.1558724714917,62.5659659635696,64.1578336007733,65.8314130389124,69.5330691193805,64.1245487455802,61.6344183165737,68.4303530872876,63.5430666914641,67.7042336997081,62.5883209465357,66.6477442083524,64.1898154618607,65.1513364579319,63.2195697710091,64.8213065439043	46.3937853361587,46.437505522269,47.1298177544908,48.8611749127841,51.6086059167003,47.5943117096565,45.2761376068216,50.2683754870497,47.1627260115337,50.2512137052573,45.9768666461683,48.9588856418262,47.6427537571982,48.3564107091397,46.4405768493571,47.617199530649	37.3466570395839,37.0746115662006,37.9391577398025,39.0096121698645,41.2030964263839,37.9981784023693,36.4469588119834,40.4656737028243,37.6536105377634,40.1193864291253,37.0110405509606,39.4115439785083,38.0368533931096,38.6066203086056,37.3843238646365,38.3314964961604	28.9346193676235,28.9156298849432,29.3936639942337,30.4247963716313,32.1355622095069,29.6359480671304,28.2375710151094,31.3511023169938,29.3672089914587,31.2903434503734,28.6745978256279,30.5344069349987,29.666111881957,30.1104906239905,28.9638020397038,29.6976315639776	NA	NA	3.8	0.571621	NA	NA	10.3	0.0691801	NA	NA	11.1	0.0376342	64.8312	47.8735	38.3774	29.8333
CLASP1	MATS_only	ENSG00000074054	NA	42878	chr2	-	122166599	122166623	122168441	122168545	122165046	122165288	10.3	25.6	24	104	242	1818	1311	AAGGTACCA	7.87	CAATATTTTCCTGCCTACAGCTG	8.25	TTGGTAAGA	8.85	CTCATTGGACCTGTCAGAAGAAG	-3.26	none	GCTGTTAGGAGACTCCAGGAGCAAGGTACCAGTCC	12.2732375745789,12.3105658855395,12.2825484135531,12.0047794615413	9.47937435129043,9.5082052959655,9.48656568345729,9.27202768048242	11.4559591711005,11.4908017791485,11.4646499986421,11.20537776066	8.12534082146184,8.15005355491959,8.13150494397149,7.94761154249512	NA	NA	-25	1	NA	NA	10.3	1	NA	NA	25.6	0.042673	12.2178	9.43654	11.4042	8.08863
PTP4A2	MATS_only	ENSG00000184007	NA	25631	chr1	-	32381495	32381588	32403587	32403988	32377296	32377427	10.3	NA	93	401	131	21999	4068	CTAGTGAGT	7.43	aattttttttttttttaaaGGAA	8.75	AGCGTGAGT	8.2	AAAAGGTCATTTCTTTTCAGGAT	6.57	none	TGAAAAAGAAGGAATCCACGTTCTAGTGAGTGTGT	49.7878648515607,49.5283277628471,60.4744470077037	58.9868213985946,58.6793314521206,68.1659291715988	23.9302765202828,23.8055313776923,29.9671832831041	26.5739946114938,26.4354681408865,31.2000212877603	NA	NA	0.8	0.857701	NA	NA	10.3	0.0115402	NA	NA	NA	NA	53.2635	61.944	25.901	28.0698
COX18	MATS_only	ENSG00000163626	NA	12898	chr4	-	73933745	73933850	73935033	73935443	73930966	73931130	10.4	-3	105	410	164	1183	2615	CAGGTAAGC	9.88	TAACAAAACCTATTTTTTAGCTA	4.5	AAGGTGAGG	9.16	TCCCCCTAACCTCAATCTAGGCT	6.76	downstream	TGGGGTGGTCCAAAAGAGATGCCAGGTAAGCTAAT	4.87114	5.67052	5.05562	5.10798	NA	NA	9	0.134962	NA	NA	10.4	0.028309	NA	NA	-3	0.470206	4.87114	5.67052	5.05562	5.10798
RNF41	MATS_only	ENSG00000181852	NA	54217	chr12	-	56606779	56606861	56607741	56607854	56604080	56604352	10.4	25.7	82	113	272	880	2427	CAGGCAAGT	3.1	AAAGCTGCCACCTTCAATAGGTC	5.76	CAGGTGAGT	10.67	TGCCTTGTTCTCTCTTCTAGGCA	12.86	none	ATGAGGAGAAGCTCACGATTACCAGGCAAGTACAA	4.53293443486596,4.6256230133054,4.41333856324496,4.29989124802942,4.51937663666905	5.30678832736835,5.41526764256078,5.16677527740273,5.03396045362625,5.28038803962654	4.53028560540394,4.62225776096608,4.41075961987391,4.2973785978279,4.51660175199111	5.0746548248989,5.17767855974314,4.94076633044124,4.81376119198122,5.05978005987614	NA	NA	-1.7	0.376269	NA	NA	10.4	0.180787	NA	NA	25.7	0.0175636	4.47823	5.24064	4.47546	5.01333
DEPDC1B	MATS_only	ENSG00000035499	NA	68587	chr5	-	59894901	59895087	59899217	59899394	59892738	59893741	10.5	0.5	186	177	1003	4130	1160	CAGGTAAAA	8.59	TACTAATCCTTTTGCCTCAGATA	6.37	CAGGTAAAG	9.65	TGGACCATTCATTTTTTTAGTTT	5.72	none	AGAGAAAAAGAAGAAACTGAAGCAGGTAAAAGGAT	22.4572468960423,20.7890967671829	16.4914701335491,15.266464764204	11.0250824790949,10.2061266719417	8.30281654988789,7.68607378699686	NA	NA	8.5	0.74763	NA	NA	10.5	0.0495549	NA	NA	0.5	0.936736	21.6232	15.879	10.6156	7.99445
IL6ST	both	ENSG00000134352	5809	259	chr5	-	55250637	55250820	55251852	55252063	55248077	55248179	5.1	6.2	183	211	102	1032	2458	GAGGTATAC	6.64	ATTCAAACTTTGTTTTAAAGCTA	5.22	AAGGTTTGT	7.81	ATCTGCTATTCTTGCTTTAGGGA	9.38	downstream	ACCGTGCATCGCACCTATTTAAGAGGTATACCTGG	2.22282556103703,2.24787995194142,2.20245068289611	1.85717592325798,1.87810892509813,1.84015266520934	3.51474330011629,3.55435943289488,3.48252643717762	1.8406437735169,1.86139043462507,1.82377205256694	5.68	0.011469	7.4	0.144278	5.1	0.182171	10.5	0.0294459	6.2	0.064394	1	0.725731	2.22439	1.85848	3.51721	1.84194
EZH2	MATS_only	ENSG00000106462	NA	53506	chr7	-	148543561	148543690	148581255	148581375	148526819	148526940	10.5	5.2	129	120	121	37565	16621	GAGGTTGGT	6.36	CCTTCATTTTTTTTTTTAAGAGT	8.6	AAGGTAAcg	10.19	AATATATTTTTTTCTTTTAGGTG	11.34	upstream	GAGCTCATTGCGCGGGACTAGGGAGGTTGGTTAAC	86.554759327223,89.5612928430277,85.6917687430889,85.1078373290255,85.2197244789882	55.7671497609403,57.7042564681903,55.2111257419059,54.3796004583763,54.9069880679695	52.6979107583822,54.5284055357864,52.1724884576154,51.5136076095985,51.8850895127516	35.9187212178148,37.1663803878663,35.5605951200006,35.0159016341939,35.3647049522444	NA	NA	7.1	0.664644	NA	NA	10.5	0.0188666	NA	NA	5.2	0.341309	86.4271	55.5938	52.5595	35.8053
WASF1	MATS_only	ENSG00000112290	NA	55758	chr6	-	110499800	110499945	110501043	110501204	110448671	110448832	10.5	14.5	145	161	161	1098	50968	TAGGTACTT	5.6	TTCTTTTCCCCTTGCTACAGCAT	8.51	AAAGTGAGA	4.23	TTATTTTTGATTTCCTACAGGTG	12.28	none	ATTAATTGATCCCCAGCTAGACTAGGTACTTAAAT	7.23965676689985,7.58103895590814,7.4669105667577,7.83059952617317	10.0878772411858,10.5635657615019,10.4045370649001,10.9113082689346	7.97700886082034,8.35316049815983,8.2274082421017,8.62813857300688	9.93813068054638,10.4067579809299,10.250089939577,10.7493385258177	NA	NA	-0.5	0.71354	NA	NA	10.5	0.0696693	NA	NA	14.5	0.0285972	7.52955	10.4918	8.29643	10.3361
BEND6	both	ENSG00000151917	1277	22888	chr6	+	56879259	56879323	56857175	56857353	56879930	56879958	18.9	15.7	64	178	28	21906	607	TGTGTAAGT	7.65	aACATGTTATTTGTCCTTAGGAA	9.39	AAGGTAAAC	8.14	ACTTTTTCTTGCCATTTTAGTGT	9.78	none	ATGGAGGCATGAAAACTTTGAATGTGTAAGTTTCC	1.8635	1.85056	0.701756	0.732034	NA	NA	0.2	1	18.9	0.0399985	10.5	0.144385	15.7	0.122879	19.1	1	1.8635	1.85056	0.701756	0.732034
RHOT1	MATS_only	ENSG00000126858	NA	20336	chr17	+	30536368	30536464	30535125	30535328	30551634	30552746	10.5	31.7	96	203	1112	1040	15170	TTTGTAAGT	7.4	CTCATGTATGTTATCTACAGAGA	6.4	TCCGTAAGT	10.27	attatattttCTGACTGCAGGCA	7.17	none	TCTGGGTCTTTCTAAAAACTGCTTTGTAAGTTACT	13.5678806808871,14.1125285295209,13.174252229583	11.9992361317327,12.4809147592286,11.6511168604585	10.7405970541583,11.1717508368438,10.4289931505018	8.45898505942936,8.79854936741551,8.21357479478589	NA	NA	3.6	0.303466	NA	NA	10.5	0.0457781	NA	NA	31.7	0.112785	13.6182	12.0438	10.7804	8.49037
CCDC125	MATS_only	ENSG00000183323	NA	30026	chr5	-	68590619	68590727	68595838	68595954	68581163	68581294	10.5	61.5	108	116	131	5111	9325	GAGGTATTG	7.44	CAATGCTTTTCAATTTAAAGCTT	5.98	GAGGTAGGT	9.65	ATTCTCATGTTCAATTTTAGGAT	10.6	none	ACTGCTTCTTCAGCTCAAACAAGAGGTATTGCGTT	2.82995	2.97656	3.73876	3.06447	NA	NA	-44.3	0.602091	NA	NA	10.5	0.208143	NA	NA	61.5	0.0419785	2.82995	2.97656	3.73876	3.06447
HEATR5B	MATS_only	ENSG00000008869	NA	30413	chr2	-	37217790	37217942	37227728	37227956	37215788	37216002	10.5	69.2	152	228	214	9786	1788	TGGGTAAGT	10.24	CTTTCATTTTTCATTTTCAGAAG	11.17	CAGGTAACC	8.66	AATATGTTCTTCTTATATAGGTT	9.24	none	TGCATTAAATTCATGCGACCCATGGGTAAGTTACA	1.85385	1.82505	2.46425	2.02843	NA	NA	-58.7	0.10442	NA	NA	10.5	0.0340476	NA	NA	69.2	0.00156967	1.85385	1.82505	2.46425	2.02843
EIF4A2	both	ENSG00000156976	1549	10174	chr3	+	186502750	186502890	186502352	186502485	186503671	186503840	10.9	12.4	140	133	169	265	781	CAGGTATTG	8.35	GTGTATCCTACTTTTTTTAGGGT	9.69	AAGGTAAAA	8.38	AATTAAGGCTTGGGTTTTAGATC	4	none	CCCCACCAGAGAACTGGCTCAACAGGTATTGATAG	97.1944	60.3392	91.6856	65.6643	8.66667	0.00200749	14.3	0.0153692	10.9	0.200122	10.6	0.0210189	12.4	0.177511	5.6	0.132881	97.1944	60.3392	91.6856	65.6643
AFG3L1P	both	ENSG00000223959	5398	36189	chr16	+	90045217	90045286	90044085	90044210	90046649	90046744	10.6	6.1	69	125	95	1007	1363	AAGGTAAAA	8.38	CTCATCATTTTGTCCCTCAGGGT	10.07	AAGGTACCT	8.49	CTTACTTTGTTTTCTCTCAGAGA	9.65	none	GAAACATCAACAGCACCAAAAAAAGGTAAAAGGGC	13.5175720118349,12.4977804364471,20.5077050841791	14.7223477063645,13.6116655403857,22.4478613893459	13.9379096020472,12.8864069521452,21.2021161559055	13.1637685334669,12.170668571504,20.0946467724553	14.08	0.00125099	3.4	0.214318	10.6	0.0275007	10.6	0.807887	6.1	0.543972	9	0.119127	15.5077	16.9273	16.0088	15.143
CDCA7L	both	ENSG00000164649	144	8249	chr7	-	21951234	21951369	21956371	21956512	21947984	21948125	13.7	12.9	135	141	141	5002	3109	ATGGTAATA	5.05	gtgTGTCTTTAATTTAGCAGGAT	6.1	CAGGTATGG	9.99	TCTTGCTCTTATTTTATTAGGTC	9.53	none	TGGAAAGACTAACCCAGAAGTAATGGTAATAATTA	39.8777803407843,37.2928600756153,37.9853684814211	27.4710347068165,25.6903329297373,26.1673886306333	24.5733217871881,22.9804528529747,23.4071875345636	17.2630941154214,16.1440819377843,16.4438688788573	-12.3867	1.01e-07	-7.2	0.47125	13.7	0.00258799	10.6	0.0503921	12.9	0.0934645	11.7	0.0734986	38.3853	26.4429	23.6537	16.617
EDEM1	MATS_only	ENSG00000134109	NA	58657	chr3	+	5251859	5251933	5249777	5249948	5252804	5252901	10.7	2.6	74	171	97	1911	871	CAAGTCAGT	2.74	TTCTCTCGTGTTCTCTCTAGGCA	11.04	CAGGTACTA	7.64	ACCAGATGATTGTTTTGTAGGTG	6.21	none	GTCTGGAAAAGTACACAAAAGTCAAGTCAGTTTTC	118.341	92.1099	68.6218	51.5083	NA	NA	4.5	0.318874	NA	NA	10.7	0.0341853	NA	NA	2.6	0.702941	118.341	92.1099	68.6218	51.5083
RWDD1	MATS_only	ENSG00000111832	NA	15150	chr6	+	116895220	116895334	116892651	116892818	116901457	116901523	10.7	14.7	114	167	66	2402	6123	AAGGTAGTA	5.69	TCTTTTTGCCTATTCTGTAGCTT	6.62	CAGGTGACT	6.6	CTGTGTGTATTTTCTTGCAGTAT	9.88	none	CTTCACTTGACAAGGTCCTGCTAAGGTAGTAGAAT	23.395211770661,28.701342275347,25.9308486094795	15.4937193118518,19.0077587434059,17.172970854542	22.7676603307592,27.9314595810345,25.2352814335002	21.4979500035649,26.3737737157137,23.8279564391757	NA	NA	-1.1	0.916184	NA	NA	10.7	0.0247282	NA	NA	14.7	0.00626487	26.0091	17.2248	25.3115	23.8999
ANXA11	MATS_only	ENSG00000122359	NA	62823	chr10	-	81940696	81940892	81965098	81965328	81935862	81935911	10.8	-15.4	196	230	49	24206	4785	cgggtaaga	9.84	tttaaagaataTATCAGCAGGGA	-0.52	CAGGTGAGT	10.67	ctgtatgacatttcacacaggtg	7.04	none	taacatggcagaagacatcatgcgggtaagagaga	54.0263417656556,49.1778239148916,52.9816334994689	37.7604926554162,34.3717304940327,37.0303173830739	50.8294364907138,46.2678203953933,49.846546834816	45.98532186465,41.8584340050019,45.0961029335656	NA	NA	8.2	0.718021	NA	NA	10.8	0.291376	NA	NA	-15.4	0.0406777	52.0619	36.3875	48.9813	44.3133
MORF4L2	MATS_only	ENSG00000123562	NA	28411	chrX	-	102933426	102933577	102940098	102941149	102930432	102931979	10.8	11.9	151	1051	1547	6521	1447	TGTGTAAGT	7.65	TTTTTTTCTTTTTCTTAGATGAT	-3.52	tgggtaagt	10.24	AAATATTTTATATATTACAGTGG	4.68	none	TTGGAAGGGAAAGAAGGAAGATTGTGTAAGTCAAA	63.1558724714917,62.5659659635696,64.1578336007733,65.8314130389124,69.5330691193805,64.1245487455802,61.6344183165737,68.4303530872876,63.5430666914641,67.7042336997081,62.5883209465357,66.6477442083524,64.1898154618607,65.1513364579319,63.2195697710091,64.8213065439043	46.3937853361587,46.437505522269,47.1298177544908,48.8611749127841,51.6086059167003,47.5943117096565,45.2761376068216,50.2683754870497,47.1627260115337,50.2512137052573,45.9768666461683,48.9588856418262,47.6427537571982,48.3564107091397,46.4405768493571,47.617199530649	37.3466570395839,37.0746115662006,37.9391577398025,39.0096121698645,41.2030964263839,37.9981784023693,36.4469588119834,40.4656737028243,37.6536105377634,40.1193864291253,37.0110405509606,39.4115439785083,38.0368533931096,38.6066203086056,37.3843238646365,38.3314964961604	28.9346193676235,28.9156298849432,29.3936639942337,30.4247963716313,32.1355622095069,29.6359480671304,28.2375710151094,31.3511023169938,29.3672089914587,31.2903434503734,28.6745978256279,30.5344069349987,29.666111881957,30.1104906239905,28.9638020397038,29.6976315639776	NA	NA	3.9	0.581029	NA	NA	10.8	0.0682275	NA	NA	11.9	0.0362307	64.8312	47.8735	38.3774	29.8333
RP11-773D16.1	MATS_only	ENSG00000225484	NA	39080	chr10	-	81568514	81568588	81574368	81574472	81565794	81565878	10.8	37.4	74	104	84	5780	2636	TATGTAAGT	6.69	ACCATAAATCTATATTGCAGAAA	7.14	AAGGTGAGA	8.68	tttcttttttttttCTGTAGCAA	9.81	none	TTGTTCTGATACTAAGGACAAGTATGTAAGTTAAT	not_in_refSeq	not_in_refSeq	not_in_refSeq	not_in_refSeq	NA	NA	-23.4	0.0498294	NA	NA	10.8	0.508402	NA	NA	37.4	0.0303475	not_in_refSeq	not_in_refSeq	not_in_refSeq	not_in_refSeq
MELK	MATS_only	ENSG00000165304	NA	787	chr9	+	36642993	36643080	36633098	36633197	36651742	36651874	10.9	1.2	87	99	132	9796	8662	CTGGTAAGA	9.45	TGCATAATTTTTTTTTGTAGTTT	7.03	CCTGTAAGT	7.52	TTGATTTTCTTTTCCTTTAGTGG	8.52	none	AACAATGGAGGATTTAATTTCACTGGTAAGAAATA	32.4098	25.5627	12.9999	12.1932	NA	NA	18.7	0.234081	NA	NA	10.9	0.0305856	NA	NA	1.2	0.819483	32.4098	25.5627	12.9999	12.1932
YY1AP1	MATS_only	ENSG00000163374	NA	25433	chr1	-	155650206	155650247	155657861	155658110	155649199	155649303	10.9	5.9	41	249	104	7614	903	ACTGTGAGT	7.94	AACGTTTGGCTTTTTTGCAGAAA	7.92	ACGGTGAGT	11.45	TCCCTTTCCTTTGCCCACAGTTC	11.14	none	GCTGATGGAAGATCTGTTTGAAACTGTGAGTAATG	27.1548742034602,32.3266434287189,30.9519875837837,30.5005301831231,32.6836661321209,30.5219416868243,31.1043390170865,31.1715871969621,29.6124549533397,27.6954490051217,31.4171501736002	21.1635606577603,25.2188686371969,24.1276063912351,23.7960968825789,25.475516816585,23.7923782219968,24.2641376285047,24.2987880646606,23.0834176790213,21.5848657803434,24.5112312742417	22.2280290806665,26.4845289076341,25.3384788108926,24.9890351070582,26.7554500287678,24.9864268201014,25.4696207792215,25.5182514387518,24.2418862550469,22.6705246828032,25.7400203845055	19.1118806548092,22.7720470709054,21.7898443460907,21.4847869337828,23.0053579309807,21.4870969657794,21.9056810484476,21.9444399557157,20.8468287340925,19.4923427779972,22.1304604704855	NA	NA	0.8	0.434664	NA	NA	10.9	0.03826	NA	NA	5.9	0.0983547	30.4673	23.756	24.9475	21.4519
ASNSD1	MATS_only	ENSG00000138381	NA	34881	chr2	+	190530101	190530177	190526188	190526336	190530766	190532322	10.9	7.2	76	148	1556	3765	589	AGAGTAAGT	9.35	GCCTAAATTATGTTTTCCAGAAA	6.48	AAGGTGAGT	10.47	ATTCTCCTTCCCTGCAACAGATA	7.74	none	ACAGAAATGCTGTCTGAGAGCAAGAGTAAGTTTTT	5.75392	6.61609	4.85245	5.56625	NA	NA	2.6	0.723064	NA	NA	10.9	0.0395333	NA	NA	7.2	0.146401	5.75392	6.61609	4.85245	5.56625
ADPGK	MATS_only	ENSG00000159322	NA	62888	chr15	-	73047896	73047995	73075799	73076126	73043709	73045233	10.9	NA	99	327	1524	27804	2663	CAGGTAACC	8.66	TTATCTTCTTCTCTTTGCAGGTT	13.23	GGGGTGAGT	7.93	GTTGTTGTTTTTGTTAGCAGGTC	6.06	none	GCTCATGAGCAGCATTGTCCATCAGGTAACCTCAT	18.3774492154987,16.3235412531569	20.8987198183778,18.5630285842801	20.1256634947535,17.8763708962777	22.1426514338511,19.6679354080279	NA	NA	12.1	0.0951294	NA	NA	10.9	0.00566423	NA	NA	NA	NA	17.3505	19.7309	19.001	20.9053
SCFD2	MATS_only	ENSG00000184178	NA	2355	chr4	-	54139992	54140168	54179802	54179930	54011499	54011749	10.9	NA	176	128	250	39634	128243	CAGGTATGT	9.8	ATAAATTCTTATGTTTCCAGGGA	7.11	TGGGTAAGC	8.84	CATATCATTTTTTATTTTAGAGC	8.9	none	GGCTTTTGAAAGGCTCCTTCTTCAGGTATGTTGCT	3.40391	3.6397	4.4199	3.8018	NA	NA	12.9	0.02368	NA	NA	10.9	0.0220389	NA	NA	NA	NA	3.40391	3.6397	4.4199	3.8018
WDR27	MATS_only	ENSG00000184465	NA	32209	chr6	-	170063658	170063745	170064261	170064382	170062399	170062520	11.1	-5.1	87	121	121	516	1138	CAGGTGCGC	9.1	TGGTCTCCTGCGCATTGCAGATG	8.44	CAGGTGGGT	8.56	CTCAATAATTCTGTCCCTAGAAG	7.09	none	TCCTGTTGACGACAGCTCTCCTCAGGTGCGCTTTT	11.2559534745558,13.0888264424099	15.7706970919522,18.3387322610205	14.1088195866718,16.4062414876417	13.6844066589387,15.9127189119157	NA	NA	5.9	0.400709	NA	NA	11.1	0.016187	NA	NA	-5.1	0.584889	12.1724	17.0547	15.2575	14.7986
GLT8D1	MATS_only	ENSG00000016864	NA	21982	chr3	-	52738739	52738968	52739718	52739807	52734460	52734512	11.1	-1.1	229	89	52	750	4227	agggtagga	6.45	cggcaccttgtttgtgccagaca	4.86	AGGGCAAGT	2.7	GGCTTGTTTTTGTTTTGTAGGGT	9.23	none	aagtgggagccagccagatgaaagggtaggagaaa	9.77156199018818,10.289243093631,9.27537189378522	10.3731289375819,11.2834596058193,10.1716212883784	7.1375594366116,7.90282241073779,7.12410195804461	7.80766270649553,8.75231738225354,7.88989023916574	NA	NA	8.5	0.200787	NA	NA	11.1	0.0401813	NA	NA	-1.1	0.825234	9.77873	10.6094	7.38816	8.14996
PTPN11	MATS_only	ENSG00000179295	NA	13035	chr12	+	112924278	112924433	112919877	112920009	112939947	112940060	11.1	4.5	155	132	113	4269	15514	CAGGTGACA	5.49	TTTTCTTGGCTCTACTCCAGGGG	7.64	CAAGTAAGT	10.08	TGCACTCTTCCAAATTTCAGAAA	7.39	none	CAGGGCCGGTCGTGGTGCACTGCAGGTGACAGCTC	22.1691	21.5845	20.5881	18.3488	NA	NA	8.2	0.248362	NA	NA	11.1	0.044584	NA	NA	4.5	0.21971	22.1691	21.5845	20.5881	18.3488
FOXN3	both	ENSG00000053254	795	73238	chr14	-	89656727	89656793	89747293	89747358	89647102	89647150	21.2	15.7	66	65	48	90500	9577	GTTGTGAGT	6.59	TTATTGGTTGATTTTTCCAGATC	7.38	AAGGTAGGT	10.29	TCTCCCCTTTGCTTTTTCAGTTC	11.89	none	ACTCCCCCTGAGATACAAGCAGGTTGTGAGTAGAT	19.0561305248013,17.1970758146091	11.8880263231681,10.7944990245882	14.5933613140629,13.0604728032752	9.11074331619855,8.29085292624978	4.34	0.172018	8.4	0.222879	21.2	0.0284137	11.1	0.0292702	15.7	0.119956	7	0.326306	18.1266	11.3413	13.8269	8.7008
SBF1	MATS_only	ENSG00000100241	NA	64024	chr22	-	50895462	50895540	50897683	50897821	50894920	50895102	11.1	8.9	78	138	182	2143	360	GAGGTACCG	8.5	TCTCTCTGCTGTGCCCTCAGTTC	9.19	ACGGTGAGG	9.2	ACCTGGCATCTCCTTCACAGGTA	9.53	none	GCCTCCAGACGGACCGCACCCCGAGGTACCGTACC	31.8378	36.6748	32.706	32.3247	NA	NA	5.5	0.219297	NA	NA	11.1	0.0344624	NA	NA	8.9	0.0485103	31.8378	36.6748	32.706	32.3247
ACAD8	MATS_only	ENSG00000151498	NA	60857	chr11	+	134126981	134127151	134123441	134123603	134128901	134128978	11.1	10.4	170	162	77	3378	1750	CAAGTGAGT	9.1	CTGCTCTCTTTTGTACATAGGAG	8.79	ACCGTAAGG	6.08	GCCTTTTGATCCCTCCTCAGGAA	9.34	none	CCACAGCCTATATAAGCATCCACAAGTGAGTGCCC	32.5617	31.1411	35.8313	32.14	NA	NA	4.2	0.334024	NA	NA	11.1	0.0544247	NA	NA	10.4	0.0286565	32.5617	31.1411	35.8313	32.14
ZNF507	both	ENSG00000168813	1998	2615	chr19	+	32838150	32838244	32836577	32836689	32843734	32845863	6.9	6.2	94	112	2129	1461	5490	tgggtaagt	10.24	ACTTTCGTTCTTGGCCACAGCTG	8.55	CAGGTAccg	10.05	TTTTACATTATCCTTTTTAGATA	9.51	none	ccacttaacagccatgtaaccttgggtaagtcact	4.07817129377184,4.12845304896787	4.14314135608056,4.19422415873947	3.59459491075007,3.63891441778188	2.61122203595092,2.64341706105315	5.97333	0.029072	-11.1	0.718103	6.9	0.0515358	11.1	0.140095	6.2	0.0672962	21.4	0.0483478	4.10331	4.16868	3.61675	2.62732
NAE1	both	ENSG00000159593	825	65009	chr16	-	66858757	66858788	66860425	66860486	66857431	66857503	13.3	15.1	31	61	72	1637	1254	AAGGTAAAC	8.14	CTTTATTCTGTTCACTTTAGTTT	7.85	CAAGTATGT	7.44	AATGCTTTGTTTTTAAAAAGAAC	4.45	none	CCTTCAAAGAAGCAGTATCGGCAAGGTAAACAATT	22.8989772241197,21.7246706998059,24.2924784712282	21.7961537954489,20.6784023187592,23.1225434939431	16.5674683083638,15.7178545489606,17.575670007644	15.3611559609271,14.5734043731872,16.295948365805	-15.44	0.0018014	11	0.331467	13.3	0.0221658	11.2	0.0887933	15.1	0.142318	2.8	1	22.972	21.8657	16.6203	15.4102
LOC101927497	MATS_only	ENSG00000237819	NA	61886	chr7	+	92484222	92484267	92465802	92465877	92546150	92546437	11.2	5.9	45	75	287	18345	61883	GAGGTGAGG	8.41	TAGTTCTATTCTCTTTGCAGTCC	7.16	CAGGTAATC	6.99	CTCTTCTTTTCCCTTCACAGCAC	11.25	none	GCTTCCACCTGCTGATCTCACAGAGGTGAGGTGAT	not_in_refSeq	not_in_refSeq	not_in_refSeq	not_in_refSeq	NA	NA	9.3	0.121606	NA	NA	11.2	0.00991805	NA	NA	5.9	0.106265	not_in_refSeq	not_in_refSeq	not_in_refSeq	not_in_refSeq
TBL1XR1	MATS_only	ENSG00000177565	NA	52709	chr3	-	176797614	176797733	176816253	176816329	176782707	176782810	11.3	-1.5	119	76	103	18520	14804	AGGGTGAGC	7.75	tcagtaccctcattttacagatg	9.01	ATGGTAAGA	9.48	TAACTTTGTTTTATTTTTAGGGT	10.11	none	GGAACTCAGCAACATCACATACAGGGTGAGCTTTT	34.1328	29.1613	19.7013	14.4511	NA	NA	1.7	0.492745	NA	NA	11.3	0.0478901	NA	NA	-1.5	0.318317	34.1328	29.1613	19.7013	14.4511
DCAF8	MATS_only	ENSG00000132716	NA	2232	chr1	-	160194851	160194909	160195380	160195453	160194231	160194339	11.3	2.5	58	73	108	471	512	CAGGTACGT	10.65	GTATCTGCTCCTTATTGCAGGTG	10.57	CTGGTAAGA	9.45	TATGTTCTTGTTCTTGGCAGAGC	8.81	none	CTTGTGTACAGCCACGACGGCACAGGTACGTGAGC	47.2941830694358,46.4575181047841,50.0477016338758	38.5560749379126,37.8739928089607,40.8001318361789	49.5195136937353,48.6434811779963,52.401669267978	38.2755043379754,37.5983856860485,40.5147847777684	NA	NA	8.3	0.0572977	NA	NA	11.3	0.0485676	NA	NA	2.5	0.621334	47.9331	39.0767	50.1882	38.7962
ZNF664,ZNF664-FAM101A	MATS_only	ENSG00000179195	NA	17053	chr12	+	124472589	124472685	124458432	124458567	124495927	124495988	11.3	3.4	96	135	61	14022	23242	GTGGTAAGT	10.36	TTTGCATTTCTCCCATCCAGCAG	7.23	CAGGTAAAC	7.82	CTACAAATTCTCTCCTTCAGACC	8.49	none	TGGGGGTTTTGATCCTGTCACTGTGGTAAGTTTTC	33.1115270851156,17.07324305801,17.2810634323116	30.2623451114093,15.1638769051434,15.3484559311424	27.5470369544337,14.1460729344624,14.3182629608182	20.8068134047627,10.0350432336759,10.157192636333	NA	NA	14.9	0.126181	NA	NA	11.3	0.0279363	NA	NA	3.4	0.460697	22.4886	20.2582	18.6705	13.6663
GEN1	MATS_only	ENSG00000178295	NA	14979	chr2	+	17952462	17952554	17950004	17950078	17953900	17954051	11.3	23	92	74	151	2384	1346	CAGGTAAGG	11.08	AAAACCACTTTCTATTAAAGGTT	6.66	GAGGTAACT	8.77	TTTTTTGGGTCTCCATAAAGGTT	7.51	upstream	CATTGTTCCGTATGTTCCCATCCAGGTAAGGAGAC	4.27756885134717,4.16884500640226	4.18193774006335,4.07303342029106	2.16760878953034,2.10000139743946	1.9415961702245,1.89226269764891	NA	NA	-11.7	1	NA	NA	11.3	0.0436655	NA	NA	23	1	4.22321	4.12749	2.13381	1.91693
TRIT1	MATS_only	ENSG00000043514	NA	14401	chr1	-	40312891	40312969	40348989	40349152	40310202	40310312	11.4	6.9	78	163	110	36020	2579	GCAGTAAGT	9.07	AAATCTACTGTATCTTTCAGGTA	9.15	CAGGTATGG	9.99	CCTTTCTTTGTCATCATTAGGAC	9.78	none	TGGGTTAAAAACCGTTTTTTGAGCAGTAAGTCTCA	16.7098	14.3429	14.0065	11.3875	NA	NA	11	0.429643	NA	NA	11.4	0.0119403	NA	NA	6.9	0.183255	16.7098	14.3429	14.0065	11.3875
GORAB	MATS_only	ENSG00000120370	NA	18204	chr1	+	170505450	170505562	170501291	170501425	170508350	170508708	11.4	57.1	112	134	358	4025	2788	gaggtacta	6.36	tgatatataaaaaatacaagaca	-3.99	AAGGTTACA	-0.83	CTCTATTTTCTTTTACATAGATC	8.33	none	aattacaaatcaagaatacagtgaggtactatttt	3.54855648380707,3.52530254756766	4.92225142268896,5.26253874552605	4.29793244496145,3.96756078581082	5.14633826663766,4.87035720090508	NA	NA	-37.2	0.526414	NA	NA	11.4	0.295415	NA	NA	57.1	0.0022756	3.53693	5.0924	4.13275	5.00835
SPAG9	MATS_only	ENSG00000008294	NA	8613	chr17	-	49073925	49074055	49075804	49075872	49072804	49072894	11.5	-26.9	130	68	90	1749	1031	CAGGTAATA	8.55	AAAATCTTTTTTCCTTTTAGAAC	9.94	AGAGTAAGT	9.35	CCTCCTTCCACCATTATTAGGTA	7.82	none	GAGTCTGCCTCAGAAGTACAAACAGGTAATATGCA	10.2774919479331,10.2253156319881,10.2625301738975,8.97343479521322	7.16873835232586,7.13234441895251,7.15830224165888,6.29716234722714	8.50349107378335,8.4603209269081,8.49111185591541,7.56327695926267	5.43327160454762,5.40568821189791,5.42536195281226,4.93343166852095	NA	NA	11.1	0.763692	NA	NA	11.5	0.793123	NA	NA	-26.9	0.0360098	9.93469	6.93914	8.25455	5.29944
KIAA0226L	MATS_only	ENSG00000102445	NA	29863	chr13	-	46946075	46946345	46961268	46961387	46942867	46942950	11.5	7.1	270	119	83	14923	3125	AAGGTAATT	8.83	AGATGCTGCCTCTCCCTCAGGCC	7.1	TGGGTGAGG	6.74	ACAATTTGCTATATTGGCAGGTG	6.1	none	CATCTGACATCTGCTGCTGATGAAGGTAATTTTAG	2.7813	3.39196	2.97934	2.51102	NA	NA	4.5	0.434207	NA	NA	11.5	0.0176258	NA	NA	7.1	0.661763	2.7813	3.39196	2.97934	2.51102
CELF2	both	ENSG00000048740	2571	8760	chr10	+	11259387	11259470	11207448	11207645	11291115	11291164	7.7	28.6	83	197	49	51742	31645	GGGGTGAGT	7.93	CTTTTCATTTCTCTCTGTAGGTT	13.03	AAGGTACAG	8.04	TCTCCCTTTTGTGTTTTTAGATG	11.42	downstream	GCACAATATTAAAACTTTACCTGGGGTGAGTCGGT	12.2194142932003,13.060929019481,11.2950201852808,12.2102975951452	13.1291329162486,13.7625499344693,11.904032449633,13.1193374925359	44.7815809488216,45.7728867598871,39.5832454908053,44.7481701697004	29.2161865112213,29.800832619951,25.7781482222091,29.1943888092731	-9.58	0.0146902	-15.1	0.401907	7.7	0.0217618	11.5	0.0719244	28.6	0.0658918	12.7	0.0346513	12.1964	12.9788	43.7215	28.4974
SREBF2	MATS_only	ENSG00000198911	NA	50121	chr22	+	42296023	42296126	42294652	42294785	42296333	42296502	11.6	11.1	103	133	169	1238	207	AAGGTGCTA	2.48	ttattgtggccactttataggta	6.29	AGAGTGCGT	3.85	ACTCCCTGTCACTGCTGCAGGAG	8.33	none	ctctgacttccagCATTGAATGAAGGTGCTAAAGG	114.664	87.1069	106.386	71.2466	NA	NA	0.1	0.885957	NA	NA	11.6	0.0135466	NA	NA	11.1	0.00660021	114.664	87.1069	106.386	71.2466
CDCA7L	both	ENSG00000164649	521	8253	chr7	-	21951234	21951372	21956371	21956512	21947818	21948125	16.9	11.6	138	141	307	4999	3109	ATGGTAATA	5.05	tatgtgTGTCTTTAATTTAGCAG	6.74	CAGGTATGG	9.99	TCTTGCTCTTATTTTATTAGGTC	9.53	none	TGGAAAGACTAACCCAGAAGTAATGGTAATAATTA	39.8777803407843,37.2928600756153,37.9853684814211	27.4710347068165,25.6903329297373,26.1673886306333	24.5733217871881,22.9804528529747,23.4071875345636	17.2630941154214,16.1440819377843,16.4438688788573	-8.64667	0.000187929	-6.4	0.416583	16.9	0.00669424	11.6	0.0236382	11.6	0.0413961	13.4	0.0474667	38.3853	26.4429	23.6537	16.617
RHBDD1	MATS_only	ENSG00000144468	NA	27741	chr2	+	227702788	227702870	227700670	227700803	227729319	227729781	11.6	53.3	82	133	462	1985	26449	AAGGTCAGT	8.68	TACAACTTTATCTCTTTCAGGGG	10.23	AGCGTGAGT	8.2	ACATGCATTTTGTGTTTTAGGTT	12.07	none	CTACATTCACTGCAATGTTGAGAAGGTCAGTGCCA	14.9390431544251,15.8650423285359	17.4529513129332,18.5347755191097	10.5280528062884,11.1806359806486	9.96184834135539,10.5793352340135	NA	NA	-10.4	0.446168	NA	NA	11.6	0.0208406	NA	NA	53.3	0.307325	15.402	17.9939	10.8543	10.2706
NCAPG2	MATS_only	ENSG00000146918	NA	14501	chr7	-	158454885	158455059	158456875	158456988	158451029	158451100	11.7	3.3	174	113	71	1816	3785	AAGGTAAGT	11	TAAAATTATTTTTATCTTAGGTT	7.3	ACTGTGAGT	7.94	TTTTCTTTTTTCGCTTTTAGGAT	14.04	none	TCCAGAGTATCTGAAAGTATTTAAGGTAAGTCTTG	36.8625	30.5594	18.1195	17.2922	NA	NA	7	0.645097	NA	NA	11.7	0.0385122	NA	NA	3.3	0.241927	36.8625	30.5594	18.1195	17.2922
CTCF	MATS_only	ENSG00000102974	NA	39589	chr16	+	67644726	67645516	67605050	67605167	67650647	67650781	11.7	14.9	790	117	134	39559	5131	AAGGTAAAA	8.38	TGTGTTCTCCCTTAATAAAGGCA	5.26	GAGGTAAGT	11.08	TTACTCCATCCTTTCTCTAGGTA	11.6	none	AAGCCAACAAAAATTAAAAAGAAAGGTAAAACGAG	22.2649170870325,29.4449792751661	19.9197253431038,26.3435025426752	16.4457141471322,21.7491810247813	15.9756672042338,21.1275518294918	NA	NA	-4.8	0.654919	NA	NA	11.7	0.0373588	NA	NA	14.9	0.0927449	25.8549	23.1316	19.0974	18.5516
CHEK1	MATS_only	ENSG00000149554	NA	38996	chr11	+	125507343	125507439	125505323	125505428	125513686	125513795	11.7	24.3	96	105	109	1915	6247	AAGGTAATA	8.49	GTCGTAATGTTTGTTTTTAGCTC	7.37	TAGGTAACT	6.43	GTATTTGTTTTCTTTTTTAGGGG	12.33	none	TGGTACAACAAACCCCTCAAGAAAGGTAATATCCT	11.3404199303791,12.0724522283107,23.0230009360472,11.0620269501388,12.7282769178196,11.692373945008	10.630591958273,11.2794777456218,22.0063563524198,10.3696243578533,11.8874659622674,10.9605162062785	5.14511401899496,5.40545957576234,9.67527469832909,5.01880797087522,5.70142447547223,5.30479448460609	6.03367365620533,6.11090987156616,10.8252121628454,5.88555459172086,6.44652750146947,6.22093089000259	NA	NA	-8.4	0.345385	NA	NA	11.7	0.0260132	NA	NA	24.3	0.00576291	13.6531	12.8557	6.04181	6.92047
RNF38	MATS_only	ENSG00000137075	NA	36953	chr9	-	36390463	36390613	36487304	36487545	36375930	36376124	11.7	NA	150	241	194	96691	14339	CAGGTTCTT	3.26	TTTCTTCCTCTTTTTCCCAGATA	10.51	CAGGTACGG	10.88	CCATTTTGTTGCATTGGCAGAGT	5.42	none	TGCTCACTTCAAAGCTTTCTTCCAGGTTCTTATAT	10.3834301707671,10.8362627790758,11.0996487335384,10.698780348053,10.5270087043305	9.1582170358122,9.49346581979033,9.7230811010739,9.43635685265201,9.22253357607486	10.6828364667053,11.0855849931674,11.3518975203772,11.0072797689944,10.7692155584308	8.20500619172612,8.46129721216571,8.6701346906686,8.45419649922944,8.21982183510619	NA	NA	11.7	0.0267585	NA	NA	11.7	0.0440996	NA	NA	NA	NA	10.709	9.40673	10.9794	8.40209
KIAA0226L	MATS_only	ENSG00000102445	NA	29867	chr13	-	46946075	46946732	46961268	46961621	46942867	46942950	11.8	5.4	657	353	83	14536	3125	AAGGTAATT	8.83	TGATTCCTTGCTCATTGCAGAAT	7.96	TGGGTGAGG	6.74	ACAATTTGCTATATTGGCAGGTG	6.1	none	CATCTGACATCTGCTGCTGATGAAGGTAATTTTAG	2.7813	3.39196	2.97934	2.51102	NA	NA	6.3	0.261637	NA	NA	11.8	0.012055	NA	NA	5.4	0.828996	2.7813	3.39196	2.97934	2.51102
RAD23B	MATS_only	ENSG00000119318	NA	13037	chr9	+	110062421	110062503	110045596	110045976	110068659	110068734	11.8	12.8	82	380	75	16445	6156	CAGGTATGA	9.46	AATCTTTATTTTTCCTATAGGTG	10.19	ACGGTATgc	8.56	TTGTCTTTTAATGTGTTTAGCCC	5.68	none	GCAGGTCAAAAATTAATTTATGCAGGTATGAATTA	21.4357134486056,19.9460321331838,19.8852750649201	21.7662979594333,19.8009953928184,19.7475266011545	13.1602694905495,11.4784394338453,11.4439667766175	12.137915356313,10.8721932463555,10.5742816155138	NA	NA	2.8	0.798344	NA	NA	11.8	0.0326656	NA	NA	12.8	0.0169676	20.4223	20.4383	12.0276	11.1948
RAD23B	MATS_only	ENSG00000119318	NA	14746	chr9	+	110062421	110062503	110045596	110045976	110068659	110068928	11.8	12.8	82	380	269	16445	6156	CAGGTATGA	9.46	AATCTTTATTTTTCCTATAGGTG	10.19	ACGGTATgc	8.56	TTGTCTTTTAATGTGTTTAGCCC	5.68	none	GCAGGTCAAAAATTAATTTATGCAGGTATGAATTA	21.4357134486056,19.9460321331838,19.8852750649201	21.7662979594333,19.8009953928184,19.7475266011545	13.1602694905495,11.4784394338453,11.4439667766175	12.137915356313,10.8721932463555,10.5742816155138	NA	NA	2.8	0.798344	NA	NA	11.8	0.0326656	NA	NA	12.8	0.0169676	20.4223	20.4383	12.0276	11.1948
FAM64A	MATS_only	ENSG00000129195	NA	36376	chr17	+	6353347	6353392	6352631	6352727	6353681	6354382	11.9	-24.5	45	96	701	620	289	CAGGTAATG	9.43	ATCCCTCCCCTTCTCTCTAGTGG	9.23	GAGGTGAGT	10.03	AAGGCAGCTCTGTCTTGAAGGAA	1.79	none	TTCATGACTGAGGAAGTGCCTGCAGGTAATGCCCA	11.0589302578744,11.3909194917665	12.398692146049,12.7709010496996	8.63297985309902,8.89214202347224	10.6632114428003,10.9833211925841	NA	NA	8.4	0.301807	NA	NA	11.9	0.721382	NA	NA	-24.5	0.0357534	11.2249	12.5848	8.76256	10.8233
ZNF521	both	ENSG00000198795	402	65673	chr18	-	22930870	22930911	22931968	22932214	22901971	22902151	15.7	2.2	41	246	180	1057	28719	AAGGTAAGG	10.51	CTTCAGCTGTTTGCTTTTAGGAT	8.44	CAGGTTTGT	7.44	ACAGTGTTGATATTTTTCAGACC	7.31	none	CAAGCGAAACCGAGATCCCTCAAAGGTAAGGAGGA	2.51204	1.47197	2.50433	2.51663	1.97333	0.514773	1.8	0.240178	15.7	0.0420851	11.9	0.761505	2.2	0.615973	7.3	0.13469	2.51204	1.47197	2.50433	2.51663
BAX	MATS_only	ENSG00000087088	NA	35324	chr19	+	49458804	49458856	49458185	49458219	49459454	49459590	11.9	18.9	52	34	136	585	598	GGGGTGAGT	7.93	TCCCTTCCTTTCTCCTCTAGGGC	13.75	ggggtgagg	5.5	GGTTCTCCTCTCTCCTGCAGGAT	11.57	none	AGACAGGGGCCCTTTTGCTTCAGGGGTGAGTTTGA	19.9923056773488,23.2489708555594,15.6158483993791,16.9758454595109,19.0297131817727	26.0885357397387,30.3382519688365,19.8629790887023,22.1522698847341,24.8324210559735	27.6368469767123,32.1387768009731,22.1974509878272,23.466970285292,26.3061839741298	38.3490989391963,44.5960109835902,29.1897321335821,32.5629463459475,36.5026608421239	NA	NA	-17.2	0.0970345	NA	NA	11.9	0.121973	NA	NA	18.9	0.00800821	18.9725	24.6549	26.3492	36.2401
KANSL2	MATS_only	ENSG00000139620	NA	59114	chr12	-	49056342	49056437	49061475	49061572	49054250	49054402	12	13.1	95	97	152	5038	1940	gttgtaggt	2.38	TCCTTAAGTCCTTATCCCAGAGA	2.82	CCCGTATCT	-1.24	CCTTGACCATTTTTCTACAGATA	8.6	none	aaagtgaaggacccagactctagttgtaggttaac	11.8825	9.3601	9.89651	8.45092	NA	NA	1	0.632641	NA	NA	12	0.0182929	NA	NA	13.1	0.105705	11.8825	9.3601	9.89651	8.45092
GBA2	MATS_only	ENSG00000070610	NA	23159	chr9	-	35741668	35741887	35744293	35744409	35740821	35741061	12.1	-25.8	219	116	240	2406	607	CAGGTGAGG	10.07	AGCCTATCTGCCCTCTTAAGTTC	3.51	CAAGTAAGA	7.61	GTCTAATCTTCTGCCCCCAGGAC	9.92	none	ACCCATCTTGCCCCATGACTACCAGGTGAGGCCCC	10.005	10.5063	13.3249	14.7992	NA	NA	12.1	0.255086	NA	NA	12.1	0.166949	NA	NA	-25.8	0.0143045	10.005	10.5063	13.3249	14.7992
BMPR1A	MATS_only	ENSG00000107779	NA	54728	chr10	+	88603162	88603267	88598695	88598736	88635623	88635842	12.2	0.1	105	41	219	4426	32356	aaggtatgt	9.79	CACTTATTTTTATTCTACAGGAT	10.16	GAGGTAAGG	10.28	TAAATATTTTTGTCTTTCAGGAG	10.43	none	cttggtgtgtagtccagttagcaaggtatgtatat	6.80681	5.34265	4.77574	3.40335	NA	NA	2.5	0.336137	NA	NA	12.2	0.0359152	NA	NA	0.1	0.851306	6.80681	5.34265	4.77574	3.40335
USP10	MATS_only	ENSG00000103194	NA	4885	chr16	+	84808765	84808831	84806146	84806291	84812500	84813525	12.2	5.2	66	145	1025	2474	3669	CAGGTGAGT	10.67	ATTGATATTTTGTTTTCCAGAAC	8.25	AAGGTAATG	8.99	CCTGCTGGGCTCTCTTCCAGTGG	7.62	none	CACCGAACCTATCGGCTCTTTGCAGGTGAGTAAAT	24.5534	25.0716	19.3144	18.6103	NA	NA	10.4	0.0662321	NA	NA	12.2	0.0249757	NA	NA	5.2	0.981887	24.5534	25.0716	19.3144	18.6103
PDS5B	MATS_only	ENSG00000083642	NA	29207	chr13	+	33344791	33344899	33344258	33344698	33347326	33347462	12.2	7.5	108	440	136	93	2427	TGTGTAAGT	7.65	TTGGGTCTTCCCCAAAGCAGAGC	3.52	GAGGTAAGC	9.85	TTACATGTGTTTTACTCTAGCCG	7.53	none	CACCATCACAACCAAAAAAAAATGTGTAAGTTGTA	10.0318	8.31568	6.81053	5.82609	NA	NA	6.1	0.397309	NA	NA	12.2	0.03077	NA	NA	7.5	0.0200999	10.0318	8.31568	6.81053	5.82609
DARS	MATS_only	ENSG00000115866	NA	5127	chr2	-	136740966	136741024	136743363	136743467	136718965	136719068	12.2	9.9	58	104	103	2339	21898	CAGGTTAGT	8.02	GCAAAAAACTTTTTTTGTAGGAT	5.52	CTGGTAACC	4.51	GTTCTTTCTGTCTTTTTCAGGGA	13.17	none	ATGATACAATCACAAGAAAAACCAGGTTAGTAGCT	32.7576	32.8396	28.0622	28.4701	NA	NA	-6.6	1	NA	NA	12.2	0.038358	NA	NA	9.9	1	32.7576	32.8396	28.0622	28.4701
CTCF	MATS_only	ENSG00000102974	NA	39588	chr16	+	67645853	67646024	67605050	67605167	67650647	67650781	12.2	17.9	171	117	134	40686	4623	CAGGTGCTG	4.87	GTGTTTTATTTTGCACATAGGTG	8.63	GAGGTAAGT	11.08	TTACTCCATCCTTTCTCTAGGTA	11.6	within_and_downstream	AGGAATCACCTTAACACACACACAGGTGCTGGATA	22.2649170870325,29.4449792751661	19.9197253431038,26.3435025426752	16.4457141471322,21.7491810247813	15.9756672042338,21.1275518294918	NA	NA	-5.9	0.522403	NA	NA	12.2	0.0283001	NA	NA	17.9	0.0585804	25.8549	23.1316	19.0974	18.5516
MRPL10	MATS_only	ENSG00000159111	NA	57661	chr17	-	45906504	45906602	45908676	45908889	45905866	45906036	12.3	-25.6	98	213	170	2074	468	caggtatac	7.48	gagtcttactctgtgcccaggct	5.51	ctggtaatc	3.45	GTTGCTATATGCCCTCCCAGGCC	5.9	none	gcctctcaagtagctgggattacaggtatacacca	20.0653914408708,18.4901842097382,19.0007415430877	21.1639343605848,19.5024874587264,20.0409968579658	23.9785350434739,22.0961316075004,22.7062576020768	21.6221949081464,19.9247728631971,20.4749425524353	NA	NA	-11.9	0.866263	NA	NA	12.3	0.834738	NA	NA	-25.6	0.0218665	19.1854	20.2358	22.927	20.674
CHCHD7	MATS_only	ENSG00000170791	NA	55143	chr8	+	57125320	57125448	57124356	57124396	57127156	57127226	12.3	10.8	128	40	70	924	1708	TGGGTATAT	2.05	CATTTCCTCTTCAATTCCAGTTA	8.36	GAGGTGAGT	10.03	TTTTTTCTGTCTACCCTCAGTAA	9.33	none	AACTCATGCACCAAACTCGAACTGGGTATATGTGA	24.2960625694275,23.3972486940267,26.3181015869091,25.5861189890431,23.6709007255358,24.0078530490309	21.8102175029938,21.0033655260044,23.6253721456356,22.9682821491704,21.2490189239694,21.5514960616771	19.1745028795762,18.4651571083086,20.7703002583705,20.1926180767218,18.6811238581134,18.9470473294033	20.7797144232359,20.0109851035324,22.5091054805663,21.8830620917263,20.2450317129304,20.5332172177408	NA	NA	-2.8	0.838864	NA	NA	12.3	0.0140676	NA	NA	10.8	0.0344049	24.546	22.0346	19.3718	20.9935
FBXO33	MATS_only	ENSG00000165355	NA	55897	chr14	-	39870379	39871065	39900767	39901704	39866872	39868991	12.3	NA	686	937	2119	29702	1388	ATGGTAGGT	8.6	GGCATGTGTTTTCCTTATAGAAT	8.34	CAGGTAGGC	9.88	GTCTTTTGTTTATTTTTCAGGTT	11.75	none	AAGCTCTCTCTTCTGGCAATTCATGGTAGGTGATC	3.50677	3.30151	4.35137	4.31345	NA	NA	NA	NA	NA	NA	12.3	0.0263543	NA	NA	NA	NA	3.50677	3.30151	4.35137	4.31345
BBS2	MATS_only	ENSG00000125124	NA	29093	chr16	-	56534765	56534937	56535264	56535409	56533689	56533819	12.4	0.2	172	145	130	327	946	CAGGTGACC	6.54	GTTTTTACTCTTCCCTGCAGACA	11.07	ATGGTAAGA	9.48	GTTTCATTGATTGGCCATAGCAC	4.44	none	AGGCATTCGTGGGTTACAGAAGCAGGTGACCCTTT	8.47325	8.17242	9.19542	7.52524	NA	NA	11.7	0.0944955	NA	NA	12.4	0.0334394	NA	NA	0.2	0.93749	8.47325	8.17242	9.19542	7.52524
TM9SF2	MATS_only	ENSG00000125304	NA	26322	chr13	+	100189992	100190117	100188861	100188991	100192967	100193047	12.4	2.9	125	130	80	1001	2850	AAGGTAATT	8.83	TTTTAAGTTCTGTTCTGCAGTCA	5.64	AGTGTAAGT	8.46	GATTTTTTAATCTCCTCTAGGAA	10.5	none	TGGCTGCTAAACTTGAACCGAAAAGGTAATTATAT	18.9958	16.3574	19.2845	16.0776	NA	NA	9.6	0.256848	NA	NA	12.4	0.0321994	NA	NA	2.9	0.405796	18.9958	16.3574	19.2845	16.0776
PFKL	MATS_only	ENSG00000141959	NA	43506	chr21	+	45730888	45730966	45726563	45726637	45731987	45732177	12.4	3.4	78	74	190	4251	1021	CTGGTGAGG	8.3	TGCCCCACTCTTGATTTCAGGGC	7.79	GAGGTAAGG	10.28	TTCTGGTCTCCTCTGTGCAGGGC	9.42	none	GAGCGTCTCCAACATCATCCAGCTGGTGAGGCCTG	36.8389935731325,43.0104418613881	48.9836565015063,57.1896380918719	43.0021118698818,50.2060358631884	54.7669622429783,63.9417914824473	NA	NA	9.3	0.22991	NA	NA	12.4	0.0209919	NA	NA	3.4	0.18913	39.9247	53.0866	46.6041	59.3544
E2F8	MATS_only	ENSG00000129173	NA	43739	chr11	-	19256290	19256605	19258860	19259017	19255906	19256068	12.4	5.4	315	157	162	2255	222	CAGGTGAGA	9.22	CAATTGCACATTCTTTGTAGATG	5.47	TTAGTAAGT	7.79	ATCCTCATCCTTCTCTAAAGCTT	5.99	within	CTCCCTGGAGTGGAATTTCGGGCAGGTGAGAGATG	28.4313019450274,26.1001715468971,27.9873151173793	17.6250090716366,16.1647348844921,17.3497746880647	10.0057497591994,9.18257210780646,9.84949869822382	7.25785587325668,6.64162067481345,7.14451627273734	NA	NA	8.3	0.78489	NA	NA	12.4	0.0268653	NA	NA	5.4	0.109445	27.5063	17.0465	9.67927	7.01466
SNURF-SNRPN	MATS_only	ENSG00000224078	NA	6990	chr15	+	25319038	25319198	25317871	25318010	25320881	25321013	12.4	13.1	160	139	132	1028	1683	AATGTAAGT	8.62	ACCTGTCTGTCTTTCTGAAGCAC	8.16	ACGGTAAGC	9.89	TTTGCTTCTGCACTTCTTAGGTG	8.48	none	GGAGGCTTTTGGATTTCTCCTGAATGTAAGTGATT	1.13582	2.06553	1.80977	2.18546	NA	NA	15	0.533782	NA	NA	12.4	0.0337367	NA	NA	13.1	0.102714	1.13582	2.06553	1.80977	2.18546
RP11-10A14.4	MATS_only	ENSG00000253426	NA	69878	chr8	+	9012475	9012586	9009312	9009426	9013661	9013873	12.5	-17	111	114	212	3049	1075	taggtgaaa	1.84	ATCTTTTTCCTTGCATTTAGGCT	9.39	CAGGTAGGT	10.28	ATTCTTTTTTATGATTAcagttg	5.23	none	cgggatgctgaacgtggaaaaataggtgaaatata	not_in_refSeq	not_in_refSeq	not_in_refSeq	not_in_refSeq	NA	NA	-1.9	0.418461	NA	NA	12.5	0.0494491	NA	NA	-17	1	not_in_refSeq	not_in_refSeq	not_in_refSeq	not_in_refSeq
CSNK2A1	MATS_only	ENSG00000101266	NA	47205	chr20	-	489094	489304	524315	524340	485761	485873	12.5	6.7	210	25	112	35011	3221	GGGGTAATT	5.8	TGTGCATTTTGTTTCTGCAGTTT	8.74	CAGGTACCT	8.16	CATTTTGTTTGTGTCCACAGAAA	10.36	none	ACGAGTCACATGTGGTGGAATGGGGGTAATTGTTT	29.4098607396943,26.0188083906534,27.13841139974	24.5574882406686,21.7259301818891,22.660808383905	22.1390711162461,19.5863643972713,20.4291759583161	16.1950422822448,14.3277013702935,14.9442298956058	NA	NA	12.6	0.675164	NA	NA	12.5	0.029536	NA	NA	6.7	0.181995	27.5224	22.9814	20.7182	15.1557
TM7SF3	MATS_only	ENSG00000064115	NA	50772	chr12	-	27143382	27143560	27148169	27148230	27126127	27127160	12.5	9.7	178	61	1033	4609	16222	TAGGTGAGT	8.83	TGTGTTATTTTTGGCTTCAGGTG	9.91	AAGGTAAAT	8.88	CTTTTTCTACTGTTTTTTAGACT	9.55	upstream_and_within_and_downstream	GGAGAGGGTAGTTGTGCTTCCCTAGGTGAGTATGT	40.3053	34.4321	23.0431	20.9378	NA	NA	5.2	0.476017	NA	NA	12.5	0.00940709	NA	NA	9.7	0.0385041	40.3053	34.4321	23.0431	20.9378
EZH2	MATS_only	ENSG00000106462	NA	47544	chr7	-	148543561	148543690	148581255	148581375	148529725	148529842	12.5	11.6	129	120	117	37565	13719	GAGGTTGGT	6.36	CCTTCATTTTTTTTTTTAAGAGT	8.6	AAGGTAAcg	10.19	TTTTATTTTTTCTGTTTTAGTGT	12.21	upstream	GAGCTCATTGCGCGGGACTAGGGAGGTTGGTTAAC	86.554759327223,85.6917687430889,85.1078373290255,85.2197244789882	55.7671497609403,55.2111257419059,54.3796004583763,54.9069880679695	52.6979107583822,52.1724884576154,51.5136076095985,51.8850895127516	35.9187212178148,35.5605951200006,35.0159016341939,35.3647049522444	NA	NA	0.4	0.923345	NA	NA	12.5	0.125322	NA	NA	11.6	0.0399369	85.6435	55.0662	52.0673	35.465
SEC24B	MATS_only	ENSG00000138802	NA	19302	chr4	+	110402832	110402937	110384056	110384800	110412482	110412563	12.5	12.5	105	744	81	18032	9545	CAGGTCTGC	5.61	TTGTGCTTTCCACTTTACAGGCG	9.25	CTGGTAGGT	8.37	TATTTTGGTTTTCCTTTTAGGTG	11.48	none	gaggaggaggaggatgaggaAGCAGGTCTGCTTTA	11.3123144480769,11.0566551676103	9.10783145837703,8.9019936832738	9.58743390802587,9.37075707626894	6.50832115298626,6.36123253459117	NA	NA	0	0.856435	NA	NA	12.5	0.0192903	NA	NA	12.5	0.0704183	11.1845	9.00491	9.4791	6.43478
EZH2	MATS_only	ENSG00000106462	NA	47529	chr7	-	148543588	148543690	148581255	148581370	148529725	148529842	12.5	14.9	102	115	117	37565	13746	TCTGTGAGC	3.27	CCTTCATTTTTTTTTTTAAGAGT	8.6	AAGGTAAcg	10.19	TTTTATTTTTTCTGTTTTAGTGT	12.21	upstream	ACAGCCTGTGCACATCCTGACTTCTGTGAGCTCAT	86.554759327223,85.6917687430889,85.1078373290255,85.2197244789882	55.7671497609403,55.2111257419059,54.3796004583763,54.9069880679695	52.6979107583822,52.1724884576154,51.5136076095985,51.8850895127516	35.9187212178148,35.5605951200006,35.0159016341939,35.3647049522444	NA	NA	-1.6	0.322035	NA	NA	12.5	0.218413	NA	NA	14.9	0.00122444	85.6435	55.0662	52.0673	35.465
PUS7L	MATS_only	ENSG00000129317	NA	58079	chr12	-	44132112	44132194	44136259	44136358	44130183	44130464	12.5	28.4	82	99	281	4065	1648	CTGGTATTT	3.5	TACCTGCTTGATTTTTTAAGATG	5.65	ATGGTATGG	6.63	TGATTTACCCTTTGTTTCAGAGG	8.31	none	GCAAAGAAGTATTTTCTTCAAACTGGTATTTACGT	4.42739567770854,4.00718893525752,4.42179563258116	4.32747575590485,3.91675247233204,4.32297407743837	3.09766079149646,2.80365997359652,3.0948704235599	2.65273034699553,2.40095814074699,2.64937500883844	NA	NA	-15.9	0.347339	NA	NA	12.5	0.0569195	NA	NA	28.4	0.00681602	4.28546	4.18907	2.99873	2.56769
IL15	MATS_only	ENSG00000164136	NA	39791	chr4	+	142577338	142577460	142557751	142557901	142609974	142610188	12.5	45.7	122	150	214	19437	32514	CGTGTAAGT	8.58	CGTACCTTTGACTCTTACAGAAT	8.56	GAGGTACAG	6.62	cagtcctgtcttgtttacagttt	6.29	none	AGATAGCCAGCCCATACAAGATCGTGTAAGTAAAG	2.84929	2.39734	2.18153	2.35103	NA	NA	-7.3	1	NA	NA	12.5	0.0183542	NA	NA	45.7	1	2.84929	2.39734	2.18153	2.35103
UBE2B	MATS_only	ENSG00000119048	NA	23186	chr5	+	133716409	133716499	133710073	133710154	133724015	133724104	12.6	28.9	90	81	89	6255	7516	ATGGTAAGT	11.01	TTATTTTGTTTTCTCTCTAGGTA	12.69	TGGGTGAGT	8.73	TTTTAGTATTGTCTTTGCAGTGT	6.49	none	TTATCCAAAATGTTTCATCCAAATGGTAAGTAGCA	11.6589	8.14037	11.2091	8.17631	NA	NA	-11.6	0.641322	NA	NA	12.6	0.212421	NA	NA	28.9	0.0135788	11.6589	8.14037	11.2091	8.17631
TOMM40L	MATS_only	ENSG00000158882	NA	42636	chr1	+	161197047	161197140	161196677	161196745	161197673	161197779	12.7	0.7	93	68	106	302	533	GAGGTGAGG	8.41	CTGAATCCTCTTTTCCTCAGGTG	9.55	CAGGTGCTC	3.6	TTCTTGCTCTTGCCACCCAGACG	6.48	none	GGATTGGCAGCTCAGTCCCACTGAGGTGAGGGCTC	5.25796	7.19398	8.01922	10.6833	NA	NA	8.1	0.214053	NA	NA	12.7	0.0135099	NA	NA	0.7	0.798614	5.25796	7.19398	8.01922	10.6833
RAB1A	MATS_only	ENSG00000138069	NA	68237	chr2	-	65318116	65318212	65325104	65325200	65313988	65315824	12.7	10	96	96	1836	6892	2292	CAGGTAAGT	10.86	TCTTGATTGTTTTGTAATAGTGG	4.77	ATAGTAAGT	8.65	GTGCCTCATTATTCTCTTAGGAA	7.36	none	AGTTGTGTATGATGTGACAGATCAGGTAAGTTCCA	20.2742775392041,22.1883708224085	15.9180662930892,17.42088994312	15.0875519176855,16.5119667571192	12.2452891730894,13.4013661633438	NA	NA	13.1	0.0407357	NA	NA	12.7	0.0196383	NA	NA	10	0.769811	21.2313	16.6695	15.7998	12.8233
CLASP1	MATS_only	ENSG00000074054	NA	48290	chr2	-	122166599	122166623	122168441	122168545	122165046	122165291	12.7	16.5	24	104	245	1818	1308	AAGGTACCA	7.87	CAATATTTTCCTGCCTACAGCTG	8.25	TTGGTAAGA	8.85	TCCCTCATTGGACCTGTCAGAAG	1.42	none	GCTGTTAGGAGACTCCAGGAGCAAGGTACCAGTCC	12.2732375745789,12.3105658855395,12.2825484135531,12.0047794615413	9.47937435129043,9.5082052959655,9.48656568345729,9.27202768048242	11.4559591711005,11.4908017791485,11.4646499986421,11.20537776066	8.12534082146184,8.15005355491959,8.13150494397149,7.94761154249512	NA	NA	24.9	0.973745	NA	NA	12.7	0.0328192	NA	NA	16.5	0.125535	12.2178	9.43654	11.4042	8.08863
FAM3A	MATS_only	ENSG00000071889	NA	60549	chrX	-	153736141	153736213	153736619	153736678	153735736	153735821	12.7	32.9	72	59	85	406	320	GAGGTGAGT	10.03	TGGCCTGGCTTACCCAGCAGGGC	4.6	ACGGTGAGG	9.2	CGTGGCACCTGCCCCCCCAGATG	8.66	none	CGGGCCTTTGACATGTGGGCCGGAGGTGAGTTGCA	9.6802495710503,9.36494258367895,9.52811718968087,10.079074453992,9.06657965350973	8.56182662091395,8.28294912520252,8.42727109492761,8.91457263999028,8.01905802823573	13.0263642167908,12.6020669269894,12.8216451344634,13.5630485394197,12.2005706464806	16.0347379819521,15.5124513519154,15.7827400498818,16.6953668688125,15.0182315104044	NA	NA	-14.1	0.737665	NA	NA	12.7	0.53566	NA	NA	32.9	0.0109953	9.54379	8.44114	12.8427	15.8087
MRPS11	both	ENSG00000181991	1359	55560	chr15	+	89015857	89015956	89010966	89011255	89018340	89018470	21.6	29	99	289	130	4602	2384	CAAGTAAGT	10.08	AATCTTTCTTCTAATTGCAGCAT	7.61	CAGGTGAGC	9.6	GCTTCTTCTACTTTTCTCAGCAC	5.76	none	CACACATTAAAGCATCCCACAACAAGTAAGTGGGA	11.6614137120749,12.4848658928847	12.170852502969,13.0302778936922	9.54084241943859,10.2145538313676	11.3157836950694,12.1148297619823	3.44	0.216724	8	0.545652	21.6	0.00952014	12.8	0.0616628	29	0.00467207	6.4	0.161115	12.0731	12.6006	9.8777	11.7153
TRIM26	MATS_only	ENSG00000234127	NA	14493	chr6	-	30168811	30168915	30181081	30181204	30166442	30166930	12.8	8.3	104	123	488	12166	1881	CAGGTACTG	9.04	TTGATTTGCCTGTAATTCAGGTT	6.4	CCGGTGAGT	10.9	CTCTATGTCGCGTCTCCAAGGAG	4.05	none	ATCTATAGGAGAGCAAGTCCTCCAGGTACTGCCCT	11.6705	15.3129	11.9365	15.4462	NA	NA	8	0.0451344	NA	NA	12.8	0.0116583	NA	NA	8.3	0.0137907	11.6705	15.3129	11.9365	15.4462
TMEM66	MATS_only	ENSG00000133872	NA	45944	chr8	-	29931392	29931567	29940362	29940640	29927157	29927575	12.9	-2.5	175	278	418	8795	3817	CAGGTAATA	8.55	TTTCTTGCTGTTTCAGACAGAAT	2.67	CTGGTGAGT	10.1	GTTTCTATTTTTCTTCACAGTGG	8.88	none	AGGCTGGGATGGGTATGATGTACAGGTAATATCCA	53.2277	38.3855	74.9563	54.1767	NA	NA	-1	0.940552	NA	NA	12.9	0.025163	NA	NA	-2.5	1	53.2277	38.3855	74.9563	54.1767
C3orf37	MATS_only	ENSG00000183624	NA	51106	chr3	+	129009521	129009647	129007696	129007840	129017196	129017378	12.9	5.9	126	144	182	1681	7549	AAGGTATCA	7.22	TTGCTCACATTTTCCCTCAGGTG	9.97	AAGGTAGGT	10.29	CCCATATATTTTGCTTCCAGTCA	6.59	none	TTTTCCTCAAATCAAGACAGAGAAGGTATCATTAT	18.4448735205591,16.6632838211254	22.9803928897698,20.7630989857374	26.264309534189,23.7301625462276	31.8385938245615,28.7666045709926	NA	NA	6	0.237838	NA	NA	12.9	0.0268598	NA	NA	5.9	0.229491	17.5541	21.8717	24.9972	30.3026
NEIL3	MATS_only	ENSG00000109674	NA	65803	chr4	+	178260936	178261011	178257261	178257475	178274461	178274882	12.9	NA	75	214	421	3461	13450	AGGGTAAGA	9.21	GCTGTTTTTTCCACTTCAAGGTT	8.4	AAAGTAAGT	9.72	TTACTTCTCTCTCCTTCCAGATT	13.04	downstream	TGATTTCAGCATTCTCTTTTACAGGGTAAGAGCAA	37.8578	32.0372	12.3308	9.86267	NA	NA	-2.9	0.494676	NA	NA	12.9	0.0315402	NA	NA	NA	NA	37.8578	32.0372	12.3308	9.86267
MFF	MATS_only	ENSG00000168958	NA	52935	chr2	+	228211941	228212100	228205007	228205096	228220392	228220477	13	0.3	159	89	85	6845	8292	CAGGTGATT	5.95	TGCTGTGCTTGTGTAAACAGTGT	7.27	TCTGTGAGT	7	TTTCTATCTCTTATCTGCAGGTA	11.84	none	TGGATGTGCTGGATGAAAATCGCAGGTGATTGGCC	17.2969	15.1769	15.5218	11.47	NA	NA	-2.6	0.643287	NA	NA	13	0.0383945	NA	NA	0.3	0.85337	17.2969	15.1769	15.5218	11.47
CORO7-PAM16,CORO7	MATS_only	ENSG00000103426	NA	43825	chr16	-	4457562	4457685	4462356	4462431	4455491	4455568	13	1.4	123	75	77	4671	1994	CTGGTGAGC	8.05	GGACTTGGTCTTTCTTGCAGGTA	9.45	CAGGTGAGT	10.67	CTGTGACTGCTTCTCTGCAGAGC	8.98	none	CCACCCCACCTCTGACGGCATTCTGGTGAGCGCAG	12.9517277686809,12.0909796370641,19.4666655822925,12.2635709403688	17.1326633065772,15.9940578483605,23.5240312365834,16.2223631943324	19.5840631669212,18.2825421589553,28.2069350062069,18.5435142119777	22.3374727408198,20.8529651700851,30.6050098326713,21.1506284318309	NA	NA	NA	NA	NA	NA	13	0.0305399	NA	NA	1.4	0.765352	14.1932	18.2183	21.1543	23.7365
CEP164	MATS_only	ENSG00000110274	NA	14233	chr11	+	117234144	117234222	117233119	117233254	117241795	117242182	13	5.1	78	135	387	890	7573	GAGGTAAGA	10.06	GTCATCATTTTTGTTTCTAGAGT	8.11	CAGGTAATG	9.43	CATGGTCTGTTGCTCCCTAGGAG	10.37	none	ACTGGGGGGTGACTTTGAGTATGAGGTAAGAGCCC	4.22161	4.61002	5.30645	5.34397	NA	NA	5.6	0.339349	NA	NA	13	0.0371614	NA	NA	5.1	0.718911	4.22161	4.61002	5.30645	5.34397
HNRNPR	MATS_only	ENSG00000125944	NA	27710	chr1	-	23660010	23660124	23664246	23664354	23650048	23650225	13.1	1.7	114	108	177	4122	9785	GAGGTAAGT	11.08	AGATGTATAATTATCTCTAGGCC	5.67	AAGGTAAAA	8.38	ATAAGGGGGTTTTATTTCAGGTA	5.61	none	CGTGCAACCTGGAATTGGAACGGAGGTAAGTGTTC	61.398322015079,65.3703101111442,61.1967222711404,65.1418313573577	49.2034411630303,52.3865164681991,49.0418829833633,52.2034179640384	40.0778361351384,42.6705566333586,39.9462416348771,42.5214168237663	37.3656974255091,39.7829638996457,37.2430081599747,39.6439166471809	NA	NA	12.2	0.0608569	NA	NA	13.1	0.0311245	NA	NA	1.7	0.693306	63.2768	50.7088	41.304	38.5089
ADD3	both	ENSG00000148700	2363	35038	chr10	+	111892062	111892158	111890120	111890244	111893083	111893969	8.5	12.9	96	124	886	1818	925	AAGGTACTC	7.46	ACTAAACTCTTATCCAACAGATG	7.45	AAGGTTAGT	8.54	AAAACCCTCCCCTTTCGTAGAAA	6.76	none	CAAAATGTCCCTGAAAAATTAGAAGGTACTCAATG	11.5009800932517,12.2310232401748,11.7549115764514	10.0808212219351,10.7056181013336,10.3033968514903	10.4425558288656,11.0952128985673,10.6731182390705	8.77382525728917,9.31957120408008,8.96754357023759	4.37333	0.0317049	6.5	0.186915	8.5	0.0427275	13.1	0.164665	12.9	0.0693879	12.8	0.0295993	11.829	10.3633	10.737	9.02031
ACSL3	both	ENSG00000123983	3236	66038	chr2	+	223765391	223765498	223752547	223752606	223773450	223773868	12.3	16.4	107	59	418	12785	7952	AAGGTAAAG	9.06	TAATTCTATATTGTATTCAGATA	5.06	CTGGtaaaa	4.78	TTTCTTTTTCTTCCTCCTAGATT	11.09	none	CACCTTAGCCTCTTGATCGAGGAAGGTAAAGAATT	13.9959089570123,14.3479452189775	9.77005017956353,10.0157942719973	9.60712757243285,9.84877370554294	7.53420334552125,7.7237096355943	10.6	0.00317327	5.1	1	12.3	0.0258911	13.1	0.0752243	16.4	0.0975249	42.7	1	14.1719	9.89292	9.72795	7.62896
TMEM66	MATS_only	ENSG00000133872	NA	45945	chr8	-	29931392	29931544	29940362	29940590	29927389	29927575	13.2	-1.5	152	228	186	8818	3817	CAGGTAATA	8.55	GTTGCTGCGGGATGTAAAAGCTC	-2.46	CTGGTGAGT	10.1	GTTTCTATTTTTCTTCACAGTGG	8.88	none	AGGCTGGGATGGGTATGATGTACAGGTAATATCCA	2195.08197589647,53.2276582811683	1772.11964576644,38.3855200422088	2999.22586204966,74.9563287186969	2321.29654048719,54.1767224411083	NA	NA	-1.1	0.927111	NA	NA	13.2	0.0188864	NA	NA	-1.5	0.707004	1124.15	905.253	1537.09	1187.74
STAM	MATS_only	ENSG00000136738	NA	25834	chr10	+	17742189	17742278	17738773	17738868	17746429	17746517	13.2	6.2	89	95	88	3321	4151	GAAGTAAGT	9.82	AACTTTTACATATCTTACAGTTA	7.55	TGAGTAAGT	8.82	TAACTACTTAATTCCTGTAGGAT	7.17	none	GCCGGAACCAGCCTTTATTGATGAAGTAAGTGGTT	16.2548717403048,17.0088733420665	9.46842673759646,9.90763099834797	12.8772170061047,13.4745420667978	10.3332947716037,10.8126169670503	NA	NA	9.4	0.310145	NA	NA	13.2	0.0218559	NA	NA	6.2	0.0335209	16.6319	9.68803	13.1759	10.573
CPNE7	MATS_only	ENSG00000178773	NA	39162	chr16	+	89662238	89662332	89661983	89662011	89662891	89663257	13.2	18.2	94	28	366	227	559	CACGTGAGG	5.78	TTGTCGAATCTACACAAAAGCAG	-3.69	AACGTGAGT	9.54	TGCGTTGTCCCATCCTCCAGGCA	9.5	downstream	CCGGCGAGACACGCACAGCACACACGTGAGGTTCT	18.9400060164065,20.692268086181	24.7034586694103,26.9889349032168	15.5559463933178,16.9951272890812	21.8118234332546,23.8297758479266	NA	NA	3.1	1	NA	NA	13.2	0.0171531	NA	NA	18.2	1	19.8161	25.8462	16.2755	22.8208
SETMAR	MATS_only	ENSG00000170364	NA	13515	chr3	+	4354581	4354913	4345054	4345210	4355350	4355445	13.3	-45.6	332	156	95	9371	437	AAGGTTTGT	7.81	AGTGTGTATATTTTTTACAGTAC	5.47	CAGGTAggg	9.46	TTCTCTGTACTGCCCCGTAGAAA	8.94	none	CCTTGGAATTTATACCGAAAGGAAGGTTTGTCTGT	2.04940492211511,1.98834356472822,2.54511365327637	3.03068680666409,2.90688683499131,3.76374736256833	3.17873987429294,3.01410193779467,3.94761141001228	3.45612223260728,3.28286250235231,4.2920868329537	NA	NA	6.2	0.686799	NA	NA	13.3	0.0292219	NA	NA	-45.6	0.615582	2.19429	3.23377	3.38015	3.67702
ZCCHC10	MATS_only	ENSG00000155329	NA	62024	chr5	-	132342450	132342612	132362188	132362296	132333903	132334542	13.3	-33.7	162	108	639	19576	7908	AAGGTAGGT	10.29	TTCTGTTTTTTGTTCTGTAGTGA	7.46	AGCGTAAGT	10.07	AACTCTGTATTGTCTAATAGGTC	8.84	none	AAAACAGATTATTATTGCAACAAAGGTAGGTTTAC	6.60317	6.38189	6.33858	6.75431	NA	NA	7.4	0.486952	NA	NA	13.3	0.0189581	NA	NA	-33.7	0.30206	6.60317	6.38189	6.33858	6.75431
PPP6C	MATS_only	ENSG00000119414	NA	10229	chr9	-	127920519	127920661	127933363	127933459	127916184	127916264	13.3	14.3	142	96	80	12702	4255	ATGGTAAGA	9.48	TGTAAACTTTTACTTCACAGGGT	8.12	CAGGTAAAA	8.59	CCCTTCTGTTTCTTTCACAGATG	13.26	none	ATAACACAGGTCTATGGATTTTATGGTAAGAATTC	10.3681614514498,9.94628453721836,10.2067321861052	10.8241459690387,10.3837152020226,10.655617157065	9.07907892226383,8.70965433163378,8.93772029785491	7.61909717316335,7.30907873646222,7.50047004095557	NA	NA	4.6	0.349183	NA	NA	13.3	0.0539243	NA	NA	14.3	0.0381821	10.1737	10.6212	8.90882	7.47622
GPBP1	both	ENSG00000062194	595	15495	chr5	+	56532939	56532999	56531792	56531859	56542126	56542311	25	32.1	60	67	185	1080	9127	TAGGTATGT	7.76	ATTTCTACCACTCTCCCCAGGCC	9.1	GGGGTAAGT	9.65	GTCATGCTTTATTTATGCAGAAT	6.25	upstream_and_within_and_downstream	AAAATCTCCCAAGCTCCTCTCTTAGGTATGTTTCC	20.918516942108,21.5263558056903,20.375531427712,20.6441199976124	14.2469463417098,14.6998080901841,13.8771359240145,14.0599897970348	15.1307160542323,15.5646174318373,14.7379654752776,15.3575586439024	10.7085616463683,11.0045936615512,10.4305976841004,10.9777546253543	-5.24667	0.122976	-12.8	0.307051	25	0.00171288	13.3	0.254737	32.1	0.0575985	30.2	0.00471582	20.8661	14.221	15.1977	10.7804
MYO1B	both	ENSG00000128641	2968	38332	chr2	+	192265474	192265561	192265107	192265194	192267357	192267444	0.5	32.3	87	87	87	280	1796	AAGGTACTT	8.4	CCTTTTCAAATGCATCACAGGCA	6.18	CAGGTAGGC	9.88	TACTATCTAAAACATTCTAGGCT	5.11	none	TTGGGCTTACTGGCTTGGATCTAAGGTACTTGATG	6.56332949792359,6.79540007964249,6.61421336738664	6.31640631869994,6.53974602596549,6.34234292347271	5.18075658515661,5.36394123173602,5.20901115329552	4.05257926779245,4.19587306836061,4.04897986965385	-29.64	1.72e-06	-2.6	0.552104	0.5	0.944272	13.4	0.0517463	32.3	0.174976	14	0.0258048	6.65765	6.3995	5.25124	4.09914
SETD5	MATS_only	ENSG00000168137	NA	32020	chr3	+	9475053	9475246	9471510	9471735	9475528	9475634	13.4	18.9	193	225	106	3318	282	CTGGTACGT	9.57	tttACCTGTACTTTCTTCAGGGT	10.02	GAGGTGGGT	7.07	TGCTTTTCGCCTTTGTGCAGCCC	8.03	within_and_downstream	CTAGGGGAAACTCCCCGCTCAGCTGGTACGTTTGT	31.7605	26.2625	28.4219	24.3602	NA	NA	11.8	0.70571	NA	NA	13.4	0.0496152	NA	NA	18.9	0.0282281	31.7605	26.2625	28.4219	24.3602
LOC645513	MATS_only	ENSG00000245958	NA	7585	chr4	+	120418965	120419058	120415640	120415678	120433505	120433619	13.4	52.3	93	38	114	3287	14447	CAGGTAGGT	10.28	ACATTTTTCTTCACTGATAGACA	6.85	GAGGTAAGT	11.08	TTTGCTCCTTCCATATTTAGTGA	8.65	none	TAAGGTTTCACCTGCTTTGCATCAGGTAGGTGAGA	21.117	17.9733	13.3408	10.9778	NA	NA	-21.3	0.855881	NA	NA	13.4	0.110711	NA	NA	52.3	0.033579	21.117	17.9733	13.3408	10.9778
TERT	MATS_only	ENSG00000164362	NA	67481	chr5	-	1264518	1264707	1266578	1266650	1260588	1260715	13.5	-14.4	189	72	127	1871	3803	CAGGTGAGC	9.6	ACATTGCCCCTCTGCCTTAGGAC	8.94	CAGGTGAGG	10.07	CATTCCCCCCTGTGTCTCAGCTA	6.18	none	TGGAGGTGCAGAGCGACTACTCCAGGTGAGCGCAC	2.89463110035614,2.75830284768549	5.31651463575934,5.06612309173778	1.48874903552237,1.41863351902256	1.94086749764105,1.849458587336	NA	NA	13.5	1	NA	NA	13.5	0.0178658	NA	NA	-14.4	1	2.82647	5.19132	1.45369	1.89516
ASCC1	MATS_only	ENSG00000138303	NA	35112	chr10	-	73862607	73862725	73887839	73887925	73856279	73857208	13.5	1.4	118	86	929	25114	5399	caggtgacc	6.54	tttgttttgttttgagacagagc	2.52	AAGGTCAGT	8.68	TTTTTATTCTTCCTTTTCAGTTG	11.71	none	gcctcccaagtagctgggattacaggtgaccgcca	11.530974591953,10.5697155402234,10.4232125884184,11.6043504106313	10.0892715155692,9.03134975470092,9.12001158535552,10.0111398939093	9.21047152813779,8.26816062773142,8.32563648560558,9.28520773874577	8.71736366996512,7.74492982984831,7.87990069859411,8.67327745429964	NA	NA	1.4	0.336292	NA	NA	13.5	0.00293874	NA	NA	1.4	0.577312	11.0321	9.56294	8.77237	8.25387
C12orf35	MATS_only	ENSG00000174718	NA	38539	chr12	+	32140172	32140256	32123122	32123290	32145311	32146039	13.6	-0.4	84	168	728	16882	5055	GAGGTAAAG	8.27	GAAAATGAATATTTAAATAGTTT	0.87	GAGGTACTC	6.43	AAAGTTTTTATTTCCCTTAGATA	7.33	none	ACACAGAAAGACAGCCAAGAGAGAGGTAAAGTCAT	22.7114	16.5623	26.9646	22.0301	NA	NA	12.2	0.0462093	NA	NA	13.6	0.0273619	NA	NA	-0.4	1	22.7114	16.5623	26.9646	22.0301
ERP29	MATS_only	ENSG00000089248	NA	62843	chr12	+	112457559	112457698	112451119	112451413	112459953	112460972	13.6	9.7	139	294	1019	6146	2255	CAGGTATGG	9.99	TCAGCTCTATACGCCCTCAGGTC	6.61	AAGGTAACC	9.24	TGTCTGGTTTCTGCTCACAGATT	9.52	none	TTGGTGGCAGAGGTGGGGATCTCAGGTATGGACAA	65.0794507157731,71.8656800102161	47.970718609095,52.9729165735842	64.0447191187567,70.7230506697749	68.0105142957859,75.1023833783922	NA	NA	1	0.946732	NA	NA	13.6	0.0186333	NA	NA	9.7	0.0463333	68.4726	50.4718	67.3839	71.5564
EWSR1	MATS_only	ENSG00000182944	NA	61315	chr22	+	29687550	29687588	29682911	29683123	29688125	29688158	13.7	-3.5	38	212	33	4427	537	GTGGTAAGT	10.36	TTCTTCGTTTATCCCCCCAGCAG	7.9	AGAGTGAGT	7.36	TGATCTTTCCTGGTTGGCAGGAC	7.27	none	CGAGGTGGCTTCAATAAGCCTGGTGGTAAGTTTTT	84.439614305878,79.2018186816412,78.6694688921455,79.1125939516206,79.7623746686505	93.1400170705847,87.3625348086875,86.7753333051191,87.2641166320349,90.4578133572469	82.6264292632212,77.5011056435101,76.9801870842931,77.4137968500702,77.0102705389667	88.2869666835162,82.8105195020199,82.2539140684739,82.7172293936812,80.7135305204066	NA	NA	-37.7	0.176418	NA	NA	13.7	0.0260345	NA	NA	-3.5	1	80.2372	89	78.3064	83.3564
SMC1B	MATS_only	ENSG00000077935	NA	15146	chr22	-	45750838	45750995	45754576	45754675	45749857	45750012	13.7	7.1	157	99	155	3581	826	ATGGTAAAA	4.79	TTGTTCTTTGCCCATAATAGGCT	7.04	AAGGTAATG	8.99	GAACATTGATTCTCTCTTAGCTT	4.1	none	GACAAGTTTCAAGAGTCCACAGATGGTAAAATTGA	5.14299	5.77782	2.73125	3.17699	NA	NA	4.9	0.617606	NA	NA	13.7	0.0264861	NA	NA	7.1	0.17696	5.14299	5.77782	2.73125	3.17699
TOM1L1	MATS_only	ENSG00000141198	NA	17304	chr17	+	52981068	52981153	52978051	52978284	52990026	52990176	13.8	-2.5	85	233	150	2784	8873	TGGGTGAGT	8.73	CAACAGCTTTTTCTTGGCAGAAA	4.83	TAGGTAAGG	9.31	TAATTTTTTTTCTAATTTAGCTT	7.91	none	ACATAATTAACACTACCCAGGATGGGTGAGTACAG	8.06362	11.4891	7.2721	7.56463	NA	NA	14.7	0.0732791	NA	NA	13.8	0.0499508	NA	NA	-2.5	1	8.06362	11.4891	7.2721	7.56463
PALB2	MATS_only	ENSG00000083093	NA	10467	chr16	-	23625324	23625412	23632682	23632799	23619184	23619333	13.9	-6.2	88	117	149	7270	5991	ATGGTAAGT	11.01	ATTTATTTTTGTTATCTAAGGAA	4.13	ttggtaagc	8.72	TTATTTTTCTCCGAAATTAGGGG	6.42	none	CTGTCACAAAGCCTATTCTGAAATGGTAAGTAATG	2.66329	2.45164	2.12075	1.94631	NA	NA	9.3	0.339129	NA	NA	13.9	0.0320778	NA	NA	-6.2	0.742274	2.66329	2.45164	2.12075	1.94631
RNF38	MATS_only	ENSG00000137075	NA	36950	chr9	-	36390463	36390613	36401094	36401195	36375930	36376124	13.9	2	150	101	194	10481	14339	CAGGTTCTT	3.26	TTTCTTCCTCTTTTTCCCAGATA	10.51	TAGGTTTGT	4.07	CCATTTTGTTGCATTGGCAGAGT	5.42	none	TGCTCACTTCAAAGCTTTCTTCCAGGTTCTTATAT	10.3834301707671,10.8362627790758,11.0996487335384,10.698780348053,10.5270087043305	9.1582170358122,9.49346581979033,9.7230811010739,9.43635685265201,9.22253357607486	10.6828364667053,11.0855849931674,11.3518975203772,11.0072797689944,10.7692155584308	8.20500619172612,8.46129721216571,8.6701346906686,8.45419649922944,8.21982183510619	NA	NA	11.4	0.0575894	NA	NA	13.9	0.0470902	NA	NA	2	1	10.709	9.40673	10.9794	8.40209
CCBL2	MATS_only	ENSG00000137944	NA	30945	chr1	-	89430238	89430395	89430511	89430661	89427741	89427828	13.9	5	157	150	87	116	2410	gaggtaagt	11.08	Atttttaattatgttttaagtat	4.34	GAAGTAAGT	9.82	CTTATTTGCTTTTATTGCAGGTC	9.25	none	cttcagagtctatattctcccagaggtaagtactc	19.6749126959341,18.760650953558	17.1570928580678,16.3598301787895	16.7288530232196,15.9514899645198	15.5928284653891,14.8682546519417	NA	NA	18.2	0.0101138	NA	NA	13.9	0.00741428	NA	NA	5	0.81138	19.2178	16.7585	16.3402	15.2305
DECR1	MATS_only	ENSG00000104325	NA	5403	chr8	+	91029351	91029554	91013632	91013789	91031136	91031194	13.9	6.1	203	157	58	15562	1582	CCGGTAAGT	10.91	AATTCATTTTCCCCTTTTAGTTT	9.55	AGGGTAAGG	9.16	TACAAGGTGTTTATTTCTAGGAA	6.42	none	GTGCTCAGTGCGTGATAGCCAGCCGGTAAGTCCCT	19.6737	20.4519	47.1125	34.2623	NA	NA	-0.1	0.639704	NA	NA	13.9	0.0383596	NA	NA	6.1	0.593777	19.6737	20.4519	47.1125	34.2623
ZNF562	MATS_only	ENSG00000171466	NA	44358	chr19	-	9767222	9767329	9785690	9785756	9759362	9764557	13.9	6.5	107	66	5195	18361	2665	ATGGTAAGA	9.48	TTTCTTCTCTAAACCCTTAGATT	8.89	GTGGTGAGT	8.95	ATCCTTTATCCCCTCATCAGCAG	3.91	none	TCAAATATTCACTGGGATACAAATGGTAAGATTCA	4.65695835832051,4.83761622566915,4.70002567519208	4.85068204355685,5.03885505386724,4.89554090733429	5.36466479795781,5.57277679443031,5.41427694841877	4.81242944637387,4.99911851972458,4.85693455205487	NA	NA	0.1	0.790423	NA	NA	13.9	0.0455386	NA	NA	6.5	0.280584	4.73153	4.92836	5.45057	4.88949
NFX1	MATS_only	ENSG00000086102	NA	66809	chr9	+	33328578	33328676	33318907	33319125	33332469	33332500	13.9	8	98	218	31	9453	3793	AAGGTAAAT	8.88	TCTTTTCGTTTTTATTAAAGATT	6.38	TAGGTAACT	6.43	TTCTTTTTCTTTTTCCATAGGAG	11.91	none	CTGCAGATGCTCTTTCAGAACAAAGGTAAATCCTA	5.73223919184212,5.35064268388606,6.29200011966325	6.61548143387855,5.32901622660194,6.59389694432322	7.32139488752522,6.01812257725597,7.50556534368867	7.33133087038554,5.39674967628264,6.83480194049444	NA	NA	6	0.634117	NA	NA	13.9	0.0388353	NA	NA	8	0.222291	5.79163	6.17946	6.94836	6.52096
RNF41	MATS_only	ENSG00000181852	NA	61106	chr12	-	56606775	56606922	56607741	56607854	56604256	56604352	13.9	12.4	147	113	96	819	2423	CAAGTACAA	-1.09	TCCTGGGATCTACTGAAAAGACC	-0.95	CAGGTGAGT	10.67	TGCCTTGTTCTCTCTTCTAGGCA	12.86	none	GGAGAAGCTCACGATTACCAGGCAAGTACAATGAG	4.53293443486596,4.6256230133054,4.41333856324496,4.29989124802942,4.51937663666905	5.30678832736835,5.41526764256078,5.16677527740273,5.03396045362625,5.28038803962654	4.53028560540394,4.62225776096608,4.41075961987391,4.2973785978279,4.51660175199111	5.0746548248989,5.17767855974314,4.94076633044124,4.81376119198122,5.05978005987614	NA	NA	0.7	0.639052	NA	NA	13.9	0.0111767	NA	NA	12.4	0.127709	4.47823	5.24064	4.47546	5.01333
SNURF-SNRPN	MATS_only	ENSG00000224078	NA	6962	chr15	+	25335058	25335157	25332613	25332746	25336736	25336866	13.9	13.3	99	133	130	2312	1579	GAGGTCCAG	-3.78	CTGATTTTCCTCATTTGCAGGGG	10.27	AATGTAAGT	8.62	TTTTCCTCTGCACTTCCCAGGTG	9.55	none	ATACCGTCATCCTCGTCGAACTGAGGTCCAGCATA	1.13582	2.06553	1.80977	2.18546	NA	NA	-2.7	0.702674	NA	NA	13.9	0.0244442	NA	NA	13.3	0.0627466	1.13582	2.06553	1.80977	2.18546
HDAC10	MATS_only	ENSG00000100429	NA	31193	chr22	-	50687090	50687180	50687756	50687945	50686653	50686721	13.9	68.6	90	189	68	576	369	GAGGTGACT	5.88	ACACATGGCTCTGGTTCCAGGGG	6.06	CAGGTGccc	5.77	CTGTTGTGTCTCCCTCACAGTGC	10.62	none	CGGCCGGGTCTGTGCCGTGCTGGAGGTGACTGGGG	17.2869577043106,17.6789522100772	22.1431725048527,22.6452852600647	26.8818133014591,27.4913782289299	32.6681370555685,33.4089111384612	NA	NA	-44.5	0.770509	NA	NA	13.9	0.248757	NA	NA	68.6	0.0313256	17.483	22.3942	27.1866	33.0385
FGFR1OP2	both	ENSG00000111790	736	56272	chr12	+	27113447	27113561	27110533	27110676	27116274	27116388	35.2	36.8	114	143	114	2771	2713	AATGTACAC	-2.47	ATAATGACTCTATACTACAGATT	5.34	AAGGTAATC	7.46	CTCCCATCCCTCTTTTTCAGGAA	12.21	none	AAGGCACTTGGAAGCAAATCAGAATGTACACTAAA	16.4798050695411,28.9057875618027,17.124077284194	14.7761106143598,26.055150951412,15.3537774902298	17.9039510438776,31.167195417443,18.6038997472391	12.1337600299104,23.1344594764137,12.6081251339604	-20.7733	1.84e-08	-6	0.269465	35.2	0.00372267	14	0.00543439	36.8	0.00131611	16.1	0.000402915	20.8366	18.7283	22.5583	15.9588
PTPRE	MATS_only	ENSG00000132334	NA	11215	chr10	+	129854386	129854477	129847828	129847930	129859202	129859279	14	24	91	102	77	6456	4725	CCAGTAAGA	5.9	AATGCTACATTTTCTTCCAGTCA	6.19	AACGTGAGT	9.54	TGTTTGGGTTTTTTTTCCAGATG	10.13	none	AACAGATATCCCAACATCCTTCCCAGTAAGATTTT	5.13874317889047,4.87568984949993	4.41579664049537,4.19257931650659	23.0078860625522,24.0338101536361	18.019559459388,18.8892765319929	NA	NA	-9.4	0.37879	NA	NA	14	0.0664425	NA	NA	24	0.0218958	5.00722	4.30419	23.5208	18.4544
BCL11B	MATS_only	ENSG00000127152	NA	49239	chr14	-	99697681	99697894	99737497	99737565	99635623	99642532	14.1	-0.3	213	68	6909	39603	55149	CAGGTAACA	8.88	TTCTATTGTTTTTTCTCCAGGGC	10.45	CCCGTAAGT	9.09	CTGTCCGTGTGTTTCCCCAGGTA	11.97	none	TTTGGATGCCAGTGTCAGTTGTCAGGTAACAGACG	27.3426688863915,28.1087815505327	38.2022048057912,39.2725901811705	37.0494788585894,38.0875660720701	31.2745660149796,32.1508462782249	NA	NA	13.5	0.0367349	NA	NA	14.1	0.00979028	NA	NA	-0.3	0.814714	27.7257	38.7374	37.5685	31.7127
PRDM2	MATS_only	ENSG00000116731	NA	55767	chr1	+	14104912	14109326	14099572	14099683	14113009	14114574	14.1	10.7	4414	111	1565	5229	3683	CAGGTAAGC	9.88	TGCTTCCATGTGCTTTCTAGGTC	9.52	AAGGTAAGC	10.22	TCAGTTTTCTTATTTTCTAGGAA	10.76	within	CCAAGCAGGAGCTGAAGGACTTCAGGTAAGCTCAG	6.74327174730835,5.67480936202098,6.51818134299788	8.29800986602339,7.65039550852612,8.81712270269678	8.00672960053587,6.89449086436283,7.93303628862698	8.61631101230433,7.5834773526895,8.77441511556378	NA	NA	2.4	0.624103	NA	NA	14.1	0.0450951	NA	NA	10.7	0.157004	6.31209	8.25518	7.61142	8.32473
ANP32E	MATS_only	ENSG00000143401	NA	41214	chr1	-	150195511	150195620	150198939	150199062	150192679	150193063	14.1	13.1	109	123	384	3319	2448	aggGTGAGT	9.25	TGGAATATATTACAAGAAAGAGT	-8.69	CAGGTGAAT	6.6	TTTTCTTTCCACTCTTTAAGAAG	7.05	none	gaaggggaagaagaggaagaagaggGTGAGTTACA	26.3518629151718,29.2695288738946,28.2269131624874	30.1329128661442,34.6639834272288,33.4292107769105	20.8866626906707,23.4822465191822,22.645780743955	23.5209958273231,26.7159650335911,25.7643103277899	NA	NA	2.6	0.940893	NA	NA	14.1	0.167607	NA	NA	13.1	0.0296137	27.9494	32.742	22.3382	25.3338
DOK2	MATS_only	ENSG00000147443	NA	49267	chr8	-	21769739	21770021	21771049	21771201	21768183	21768368	14.1	15.9	282	152	185	1028	1371	CCCGTGAGT	8.4	CTCCCACGCCTCTGGCACAGAAA	5.09	AAGGTAGGA	9.45	CTCTCTCTTCTTCTCCCCAGTCG	10.32	none	GGCCATCTGCCTCCTGGCCTTCCCCGTGAGTCGCG	13.0353	5.94622	14.0006	17.8982	NA	NA	5.5	0.403965	NA	NA	14.1	0.528555	NA	NA	15.9	0.0139762	13.0353	5.94622	14.0006	17.8982
EXOC7	both	ENSG00000182473	699	22906	chr17	-	74087223	74087316	74090494	74090662	74085255	74085401	22.7	25.7	93	168	146	3178	1822	AAGGTAATC	7.46	CTGTGTGGCTCTGGTGACAGGGA	5.57	CAGGTGAGC	9.6	AGAGTTGTGCCATCCCCCAGGGA	6.08	none	GGCTCTAACCTCATTCCTCTGGAAGGTAATCACCC	16.6816446744966,16.4416213659382,16.0846670951626,16.3625593279873,16.9265454154626,16.5981146364853	19.9948471000483,19.7384244307881,19.2793016215387,19.6123870465098,20.2883884723682,19.8947268558586	26.5623110609409,26.2168848791951,25.611739071902,26.0542290106185,26.9522683935377,26.4293055392504	28.9204725370046,28.537169953376,27.8855102161292,28.3672837369344,29.345049687016,28.7756589878938	2.58	0.747402	-3.1	0.759878	22.7	0.0355179	14.1	0.108483	25.7	0.153473	16.2	0.0732321	16.5159	19.8013	26.3045	28.6385
ATG4C	MATS_only	ENSG00000125703	NA	64818	chr1	+	63307098	63307218	63300446	63300523	63329662	63329791	14.1	30.5	120	77	129	6575	22444	AAGGTATCt	7.56	AAGAACTTTAAAAATTACAGACA	1.74	GAGGTACTG	7.67	TTCTATACTTTCTGTTACAGATG	11.02	none	ACGAGCTTCTGAAGAAATCACCAAGGTATCtttat	6.88117691670133,7.00460609906369	5.54331168573031,5.64274328547435	4.98105695825845,5.07040327141106	3.34946539826489,3.40954549509475	NA	NA	-16.3	0.179974	NA	NA	14.1	0.122127	NA	NA	30.5	0.0246595	6.94289	5.59303	5.02573	3.37951
REPS1	MATS_only	ENSG00000135597	NA	15087	chr6	-	139247537	139247615	139251113	139251134	139242173	139242261	14.1	62.2	78	21	88	3498	5276	CCTGTAAGT	7.52	CTCCTCTGTCTGTTCAGCAGTGG	4.92	GAGGTTAGC	3.77	TTCCTCCCATTTGTCTCTAGGAT	11.78	none	TTCTAACATTGCACCAGCTGATCCTGTAAGTCAAT	11.5028010648273,11.2499209963221	8.81429749221756,8.62052206820602	10.8809825651225,10.6417726891136	7.47402416467253,7.30971359960927	NA	NA	-46.3	0.65766	NA	NA	14.1	0.063041	NA	NA	62.2	0.0382564	11.3764	8.71741	10.7614	7.39187
KIAA0226L	MATS_only	ENSG00000102445	NA	29856	chr13	-	46946075	46946213	46961268	46961365	46942867	46942950	14.2	1.7	138	97	83	15055	3125	AAGGTAATT	8.83	CTTCTCTCTGTCCTCAACAGAGG	9.92	TGGGTGAGG	6.74	ACAATTTGCTATATTGGCAGGTG	6.1	none	CATCTGACATCTGCTGCTGATGAAGGTAATTTTAG	2.7813	3.39196	2.97934	2.51102	NA	NA	2.5	0.592749	NA	NA	14.2	0.0406757	NA	NA	1.7	1	2.7813	3.39196	2.97934	2.51102
SOS1	MATS_only	ENSG00000115904	NA	63336	chr2	-	39285813	39285945	39294768	39294894	39283842	39284007	14.3	-18.7	132	126	165	8823	1806	AAGGTAATG	8.99	TTATTTTCCTATTTTCCAAGGAA	7.16	GAGGTATGA	8.55	CTTTTCTTTTAATTTTGCAGGAG	11.11	none	AGAAAAAATTCATCCTTTATTAAAGGTAATGCTGA	2.96538	2.29309	2.14165	1.346	NA	NA	14.3	0.82424	NA	NA	14.3	0.532831	NA	NA	-18.7	0.0233798	2.96538	2.29309	2.14165	1.346
HAT1	MATS_only	ENSG00000128708	NA	39552	chr2	+	172809398	172809519	172782046	172782151	172821858	172822038	14.3	5.6	121	105	180	27247	12339	GAGGTAAGA	10.06	TGCTATTTTTTCCATTTCAGTGA	9.92	TAGGTATGT	7.76	TTATATCCTTTATTCTTTAGGCA	8.9	none	TGATGAGAACTTTGACTGTGTAGAGGTAAGAACAG	16.9405553078116,17.7482605797022	15.1458568629236,15.8679930747066	11.0946516500857,11.623631277066	11.4376136947419,11.9829453389078	NA	NA	15.9	0.59633	NA	NA	14.3	0.0349728	NA	NA	5.6	0.116206	17.3444	15.5069	11.3591	11.7103
PPP1R13B	MATS_only	ENSG00000088808	NA	45737	chr14	-	104230199	104230816	104245081	104245158	104223986	104224088	14.3	9.4	617	77	102	14265	6111	aaagtaagt	9.72	cattgtattttctgataaAGGAc	5.74	GGGGTAAGT	9.65	AATAAGTGCTTTTTGTTTAGGTT	6.09	none	acttatatgaagcgtccggaagaaagtaagtctag	3.51124	3.99907	5.86549	5.89191	NA	NA	0.6	0.896804	NA	NA	14.3	0.0274335	NA	NA	9.4	0.115394	3.51124	3.99907	5.86549	5.89191
SUB1	MATS_only	ENSG00000113387	NA	23862	chr5	+	32571196	32571280	32531923	32532022	32588617	32588690	14.4	-11.1	84	99	73	39174	17337	agggtaagt	10.45	GTACATGTATCTGTCAACAGATT	7.42	caggtgagg	10.07	GTAATGTATTTTTCTTTCAGGAT	9.85	none	CAATAGGCCTGGtgcattcattagggtaagtggtg	32.9155	23.2829	24.9857	26.2985	NA	NA	-2.9	1	NA	NA	14.4	0.0182983	NA	NA	-11.1	1	32.9155	23.2829	24.9857	26.2985
CALU	MATS_only	ENSG00000128595	NA	37375	chr7	+	128388626	128388858	128379395	128379486	128398924	128399091	14.4	4.1	232	91	167	9140	10066	TGGGTAAGG	9.08	TGCTTTTCATTTTCTTCAAGATC	7.41	AAGGTAAGT	11	CCTAAATTTTTGTTTTCTAGATG	8.74	none	CAGAAGAGAGCAAGGAAAGGCTTGGGTAAGGTACC	9.22643368028348,11.042731233714,10.6303812996694,9.22643368028348,10.6303812996694,11.5489497446307	8.53390811399977,10.213876449087,9.83247702977831,8.53390811399977,9.83247702977831,10.682098777179	7.70661504062016,9.22372409147925,8.87929824788405,7.70661504062016,8.87929824788405,9.64655606808661	6.8334065476887,8.17861749530392,7.87321729010213,6.8334065476887,7.87321729010213,8.55353992003793	NA	NA	10.2	0.159892	NA	NA	14.4	0.0136958	NA	NA	4.1	0.303388	10.3842	9.60479	8.67368	7.6909
DICER1	MATS_only	ENSG00000100697	NA	34340	chr14	-	95597845	95597976	95598851	95599014	95596394	95596529	14.4	17.1	131	163	135	875	1316	CAGGTAAGA	10.77	AGTATTATATTTGTAATTAGCAA	1.49	CTGGTAATA	4.88	TGATGTTGATTTTATTTTAGGTT	8.85	none	GAACCAAGAGTTTACTAAGCACCAGGTAAGACTTG	7.91694203774513,7.70555589433167,7.58391270331121	6.76812951619779,6.62262573344786,6.50577718188669	6.38080471488509,6.15280104913617,6.07803190394152	4.34512109361948,4.20562616982496,4.15294253242173	NA	NA	6.9	0.519389	NA	NA	14.4	0.0262386	NA	NA	17.1	0.0575319	7.73547	6.63218	6.20388	4.23456
RNF38	MATS_only	ENSG00000137075	NA	36954	chr9	-	36390463	36390613	36400550	36400920	36375930	36376124	14.5	-16.8	150	370	194	9937	14339	CAGGTTCTT	3.26	TTTCTTCCTCTTTTTCCCAGATA	10.51	CAGGTACTG	9.04	CCATTTTGTTGCATTGGCAGAGT	5.42	none	TGCTCACTTCAAAGCTTTCTTCCAGGTTCTTATAT	10.3834301707671,10.8362627790758,11.0996487335384,10.698780348053,10.5270087043305	9.1582170358122,9.49346581979033,9.7230811010739,9.43635685265201,9.22253357607486	10.6828364667053,11.0855849931674,11.3518975203772,11.0072797689944,10.7692155584308	8.20500619172612,8.46129721216571,8.6701346906686,8.45419649922944,8.21982183510619	NA	NA	24.2	0.0581888	NA	NA	14.5	0.00529332	NA	NA	-16.8	0.617791	10.709	9.40673	10.9794	8.40209
BRMS1L	MATS_only	ENSG00000100916	NA	49230	chr14	+	36302183	36302311	36300615	36300706	36331795	36331892	14.5	-6	128	91	97	1477	29484	CAGGTAGGA	9.79	TTAATTTTTGCTTTGTTAAGACT	3.16	TCAGTAAGT	9.14	TAATCTGTTTTTCTCCCCAGAGC	10.66	none	ATGCAAATTCGTACAAAGGTAGCAGGTAGGAAAGT	1.92201	1.47936	1.33888	1.03647	NA	NA	4.1	0.572453	NA	NA	14.5	0.0479342	NA	NA	-6	1	1.92201	1.47936	1.33888	1.03647
ZNF280B	MATS_only	ENSG00000198477	NA	70222	chr22	-	22848381	22848499	22862976	22863472	22841202	22843791	14.5	3.2	118	496	2589	14477	4590	aaggtctgt	6.43	ttcatttctcacatttttaggct	9.96	CTGGTAAGG	9.68	TGATGTATGTTTGTACTTAGGTG	8.4	none	tcacatgacagaaagaggaagcaaggtctgtgata	2.04734	1.74827	1.52052	1.22392	NA	NA	11.3	0.124205	NA	NA	14.5	0.0368819	NA	NA	3.2	1	2.04734	1.74827	1.52052	1.22392
DNAJC10	MATS_only	ENSG00000077232	NA	51625	chr2	+	183600975	183601113	183595756	183595834	183604271	183605115	14.5	14.5	138	78	844	5141	3158	TTGGTATGA	5.24	GTTGTTTCTTTCCATTTTAGGAT	12.43	GAGGTAATA	7.96	TGCATTCTTTATAATAACAGCTG	4.71	downstream	TAACAAAGAGAAAAACAGTATTTTGGTATGAATCA	7.25285	7.07807	9.75177	8.68093	NA	NA	0	0.749279	NA	NA	14.5	0.0458607	NA	NA	14.5	0.0903291	7.25285	7.07807	9.75177	8.68093
SIPA1L1	MATS_only	ENSG00000197555	NA	42221	chr14	+	71880664	71880731	71787838	71787898	71979459	71979562	14.5	60.7	67	60	103	92766	98728	AAGGTGAGT	10.47	TCATAATTATTTTAATCTAGGTT	7.18	GCGGTAAGT	11.37	ctagatctttccccttccaggcc	8.83	none	ACTACTAACTTTGAAATGGAATAAGGTGAGTTGGT	6.27318	4.93322	7.06502	4.93752	NA	NA	-2	0.763949	NA	NA	14.5	1	NA	NA	60.7	0.0485632	6.27318	4.93322	7.06502	4.93752
IFNAR2	MATS_only	ENSG00000159110	NA	18425	chr21	+	34614190	34614282	34602445	34602521	34617255	34617379	14.6	-5.5	92	76	124	11669	2973	TGGGTAAGT	10.24	TCACCTAATGTTGATTTCAGATG	7.51	AAGGTAACG	10.19	CTTTTTCTTCTTCTCTTTAGATT	11.44	downstream	AGATCACTTAATTTGGTTCTCATGGGTAAGTGCTG	32.7942097556172,55.8374002493148,54.0170455990891	18.5509078520316,29.9360451117345,28.960100338425	52.0506709326574,82.6173385944836,79.9239313830405	26.1908001582819,38.3127204939636,37.0636877918216	NA	NA	30.4	0.0221406	NA	NA	14.6	0.0322073	NA	NA	-5.5	0.849816	47.5496	25.8157	71.5306	33.8557
ARNTL	both	ENSG00000133794	6025	52372	chr11	+	13347959	13348014	13331533	13331606	13371491	13371617	5	2.4	55	73	126	16353	23477	gtggtaagc	8.15	ctctcctctcccttccaaagGTT	10.99	TTGGTAAGT	10.47	TCTTGTGGCCCCCACTGTAGGTT	7.89	none	ggcttcctgtgtgccgggcactgtggtaagcactt	8.61919991662288,8.79221305363538,8.57014008074029	6.19706988142017,6.32146361991583,6.16179662702575	6.98635699410254,7.12659408704985,6.94659117698919	5.48892779108316,5.5991069985684,5.45768522806027	-0.24	0.866508	10.5	0.0411214	5	0.207125	14.6	0.0182756	2.4	0.612246	-2.4	0.703442	8.66052	6.22678	7.01985	5.51524
ABI2	MATS_only	ENSG00000138443	NA	11349	chr2	+	204259422	204259569	204255768	204255866	204260378	204260503	14.6	3.2	147	98	125	3556	809	CAGGTATTT	7.51	ATACGCTCTTCTTTTTGTAGGCG	9.63	TGGGTGAGT	8.73	GGTGGCTCTTATTTCTTTAGCAG	5.15	none	TGAATCAAAGAAATCGAACTTACAGGTATTTTCTC	13.439	11.0583	13.1191	9.83326	NA	NA	10.3	0.191497	NA	NA	14.6	0.0191403	NA	NA	3.2	0.224462	13.439	11.0583	13.1191	9.83326
MLL5	MATS_only	ENSG00000005483	NA	5001	chr7	+	104703797	104704027	104681285	104681470	104714065	104714124	14.6	13.1	230	185	59	22327	10038	CAGGTAAAA	8.59	ATTTGTGTTTAATTATTCAGGAC	8.03	AGAGTAAGT	9.35	ATGCTAATTTTTTAATGTAGGAA	7.01	upstream	ACATGATCTGTTGTGACAAATGCAGGTAAAATATT	22.5323900825824,23.0290086577458	19.1715639935702,19.5941092610383	18.5105055675942,18.9184809695308	14.7754096423111,15.10106275133	NA	NA	7.2	0.568216	NA	NA	14.6	0.506797	NA	NA	13.1	0.0411721	22.7807	19.3828	18.7145	14.9382
PPHLN1	MATS_only	ENSG00000134283	NA	22107	chr12	+	42748962	42749024	42729684	42729776	42768664	42768876	14.7	3.3	62	92	212	19186	19640	CAGGTAAAA	8.59	GTAGCTTTTTTATGTTACAGGAT	7.8	AGTGTAAGT	8.46	TGTTTTTTTTTTTTTCAAAGGGA	8.91	none	CTGCAAGCAGGCAACCTGAATACAGGTAAAAGGAT	15.2387360384063,33.4259309228916,29.991759937663,15.5603037390995,31.2568244386027,31.6224944220402,28.2337435286558,28.9637801923552	14.0462440361963,29.7386424648506,26.6833024855851,14.3426477790469,27.8088149200841,29.1502651635301,25.1192167595836,25.7687214623269	15.7462727163215,33.8804906121639,30.3996182889964,16.078550452422,31.6818864192915,30.2819077390265,28.617694590931,29.3576590331499	12.8497541028381,27.2841634465958,24.4809959692058,13.120909523531,25.5136142287765,25.1618997308342,23.0460020671422,23.6418998956973	NA	NA	12.2	0.262866	NA	NA	14.7	0.0331079	NA	NA	3.3	0.259916	26.7867	24.0822	27.0055	21.8874
ABHD10	MATS_only	ENSG00000144827	NA	42497	chr3	+	111700630	111700814	111697881	111698050	111705760	111705898	14.7	8.9	184	169	138	2580	4946	AAGGTAGGA	9.45	TTTTTGTGTACTTTGTTTAGCTT	6.3	CAGGTCAGT	8.94	ttattttattttattttTAGATT	9.85	none	AATCTCTAGGTCACGCCTGCATAAGGTAGGAACAA	11.5937	11.0401	12.3902	10.7813	NA	NA	12.5	0.74356	NA	NA	14.7	0.0189603	NA	NA	8.9	0.029273	11.5937	11.0401	12.3902	10.7813
DAXX	MATS_only	ENSG00000204209	NA	11088	chr6	-	33288512	33289344	33290638	33290750	33288156	33288368	14.7	11.7	832	112	212	1294	144	CAGGTAGGG	9.46	tcttcccCTGAACCTTCTAGTTC	5.56	GAGGTGGGG	4.41	CTTTATGTCTTCCCACGTAGGCG	9.2	none	CACCTCACAGATGACTATAGGCCAGGTAGGGGGTT	33.943341921998,30.6165825299492,30.5814583434904,31.4102567039385	32.7003445185936,29.4954102931878,29.4615723463887,30.2600203007881	37.6287963038261,33.9408285190713,33.9018906660857,34.8206771766749	43.7950303798272,39.5027149980371,39.4573963957449,40.5267445305864	NA	NA	8.1	0.427323	NA	NA	14.7	0.0794239	NA	NA	11.7	0.0335551	31.6379	30.4793	35.073	40.8205
RWDD4	MATS_only	ENSG00000182552	NA	22190	chr4	-	184572370	184572480	184580081	184580378	184572136	184572284	14.7	12.2	110	297	148	7601	86	CATGTGAGT	7.83	AGATTTCCCCTTCTCTTCAGATA	8.39	GAGGTGAGC	8.7	ATTTTTGTTGTGCATTGTAGATC	9.33	none	TGAACGCTTTTTTTAACAACACCATGTGAGTAGTG	4.84412	4.72529	3.37172	3.50151	NA	NA	11.2	0.769285	NA	NA	14.7	0.413363	NA	NA	12.2	0.0494909	4.84412	4.72529	3.37172	3.50151
RNF138	MATS_only	ENSG00000134758	NA	52778	chr18	+	29703480	29703537	29672652	29672849	29706655	29706763	14.7	19	57	197	108	30631	3118	AAGGTAAGC	10.22	TTTCCCCTGTGCTTCTTAAGCAA	6.62	CGTGTGAGT	7.42	AAACAATCTGTTTCTTATAGACA	5.4	none	CAGAAACTTACCAAGAGAATACAAGGTAAGCTTTT	11.5530527958936,10.5606796955457,10.6110448247816	9.46969539171619,8.6562765368688,9.02084634525926	7.5923463106922,6.94018619506162,7.38161574937431	6.78056596963283,6.19813538680114,6.99486978762813	NA	NA	1.6	1	NA	NA	14.7	0.0279958	NA	NA	19	1	10.9083	9.04894	7.30472	6.65786
PTPN2	MATS_only	ENSG00000175354	NA	18681	chr18	-	12859162	12859253	12884071	12884337	12836789	12836890	14.8	1.8	91	266	101	24818	22272	CATGTAAGT	8.31	tatatttttgttattttaaGGAA	8.6	TTGGTGAGT	9.27	TTATCATTCTCTATTTTCAGATG	11.54	none	AACAGATACAGAGATGTAAGCCCATGTAAGTACTT	25.5096725687913,10.4137904996542,28.2343159224848,26.5432412166166	20.7058934612738,9.20333992834435,22.9174535998609,21.5448286631693	18.7216649744873,7.44093574697687,20.7212931510253,19.4802057162604	12.5038979940682,5.08058298646571,13.8394173925602,13.0105151177268	NA	NA	12.7	0.666027	NA	NA	14.8	0.0460031	NA	NA	1.8	0.608782	22.6753	18.5929	16.591	11.1086
OCIAD2	MATS_only	ENSG00000145247	NA	72959	chr4	-	48901845	48901942	48906500	48906628	48899820	48899874	14.8	6.6	97	128	54	4558	1971	GAGGTAATT	8.88	CCATATAACTTTCCTTACAGAGC	8.29	CAGGTATAC	7.48	AGGACATTTTTGCTTTACAGCTC	7.67	none	CAGGAAGAAAGTTTCTGGAAGAGAGGTAATTGCAC	54.7983027084141,46.3346905099941	55.0663135722886,46.5613070257833	66.8983652276359,56.5658952055665	69.8043241119328,59.0230279794615	NA	NA	0.2	0.886063	NA	NA	14.8	0.0137916	NA	NA	6.6	0.254879	50.5665	50.8138	61.7321	64.4137
YME1L1	MATS_only	ENSG00000136758	NA	7544	chr10	-	27425204	27425314	27437834	27437969	27423759	27423910	14.8	14	110	135	151	12520	1294	AAGGTAATT	8.83	AATGGTATTGTTTTATTTAGTTT	5.99	GAGGTAAGT	11.08	TGTGTTGTTTGTGTATTCAGGGG	8.64	none	GAATATAGCGCCATCATTCGTGAAGGTAATTAGAC	25.3461485611723,23.7901094271303,24.7525198155948	21.133131354857,19.8357358419395,20.6381751201442	21.4116869293257,20.0971904602675,20.9102066818681	18.0814099320382,16.9713643018313,17.6579276554185	NA	NA	12.1	0.333168	NA	NA	14.8	0.00969605	NA	NA	14	0.0398252	24.6296	20.5357	20.8064	17.5702
TRAF3IP3	MATS_only	ENSG00000009790	NA	38873	chr1	+	209951455	209951518	209950696	209950832	209952659	209952719	14.9	6.1	63	136	60	623	1141	AGGGTAAGT	10.45	TTGCATTATTGCATTTTCAGATC	8.56	AAGGTACTC	7.46	TTCCTTGTGTTTTCCAACAGGTT	12.52	upstream_and_downstream	GTGACCAGAGTACAGCAGTTGCAGGGTAAGTTCGC	10.2073	15.4027	24.8922	29.3617	NA	NA	6.7	0.4275	NA	NA	14.9	0.043709	NA	NA	6.1	0.138436	10.2073	15.4027	24.8922	29.3617
ARFRP1	MATS_only	ENSG00000101246	NA	16979	chr20	-	62338350	62338444	62339218	62339355	62338002	62338090	14.9	11.4	94	137	88	774	260	ACGGTGAGT	11.45	TGTTGGGGTGCCCAGGGCAGGAT	0.43	CAGGTAGGC	9.88	GCCTCTGCCTCTCTCCTCAGACC	12.43	none	GGGCCTGGACAATGCTGGGAAGACGGTGAGTGCCC	10.9344369167609,10.637555455541	11.3650380553721,11.0564653204079	13.942445326862,13.5638932740103	17.2213467739052,16.7537690985907	NA	NA	4.6	0.209854	NA	NA	14.9	0.0164743	NA	NA	11.4	0.130159	10.786	11.2108	13.7532	16.9876
POLR2D	MATS_only	ENSG00000144231	NA	31950	chr2	-	128610498	128610679	128615601	128615731	128604272	128605759	14.9	25.9	181	130	1487	4922	4739	TAGGTGAGT	8.83	TTTATGCTTCTTACAAATAGAGT	5.67	AAGGTTGGG	4.94	TTCTTTTCATTTTCTTGTAGCTT	9.36	upstream	GAGAGACCATTGCCAGTGTTCGTAGGTGAGTGCTA	24.2429	26.2157	16.6038	18.1284	NA	NA	-10.9	0.917762	NA	NA	14.9	0.0314607	NA	NA	25.9	0.0877385	24.2429	26.2157	16.6038	18.1284
ZNF562	MATS_only	ENSG00000171466	NA	39395	chr19	-	9768684	9768811	9785690	9785776	9767222	9767329	14.9	36.5	127	86	107	16879	1355	TGGGTAAGA	8.91	GCATGTGTTTGATGACTTAGGAT	5.87	GTGGTGAGT	8.95	TTTCTTCTCTAAACCCTTAGATT	8.89	none	AACTACATGAACCTGGCCTCTGTGGGTAAGAGTAA	4.65695835832051,4.83761622566915,4.70002567519208	4.85068204355685,5.03885505386724,4.89554090733429	5.36466479795781,5.57277679443031,5.41427694841877	4.81242944637387,4.99911851972458,4.85693455205487	NA	NA	-20.6	0.177564	NA	NA	14.9	0.283989	NA	NA	36.5	0.016602	4.73153	4.92836	5.45057	4.88949
SLC25A20	MATS_only	ENSG00000178537	NA	49650	chr3	-	48895939	48896064	48899974	48900092	48894824	48895205	14.9	NA	125	118	381	3910	734	GCGGTGAGT	10.49	AATTGGGTTCTGCCCCACAGCAC	6.91	GAGGTAACC	8.55	TCCTCCCAATCCCTTCTTAGGCC	8.92	none	GATCCGAGCCTTCCCAGCCAATGCGGTGAGTAGCT	3.04752	3.05585	4.67647	5.69986	NA	NA	7.9	0.408598	NA	NA	14.9	0.0273184	NA	NA	NA	NA	3.04752	3.05585	4.67647	5.69986
TMEM126B	MATS_only	ENSG00000171204	NA	16477	chr11	+	85342730	85342852	85339645	85339732	85345129	85345323	15	12	122	87	194	2998	2277	AATGTAAGA	5.55	TCTGGAATTTTTTTTTCCAGGTT	8.62	AAGGTAGGC	10.08	TTTTTCTTTTTTTCTATTAGGAC	11.36	none	ATTTTGACTATCTTAGAAAAGAAATGTAAGAGAAA	11.7776605815395,9.17831376371469,8.86731304940701,9.66617008088512,11.7133720412472,10.3366558668425	12.8031092339532,9.97744440729801,9.63936571250527,10.5077770379562,12.733223266519,11.2366401850977	12.2947635707435,9.58129137121243,9.25663604375813,10.0905672188715,12.2276524158814,10.7904909565967	11.4396487292724,8.9149016187914,8.61282643997285,9.38875674988032,11.3772052318419,10.0399999926466	NA	NA	6.3	0.721908	NA	NA	15	0.0424165	NA	NA	12	0.0583343	10.2566	11.1496	10.7069	9.96222
UBOX5	MATS_only	ENSG00000185019	NA	49949	chr20	-	3095950	3096112	3102029	3103230	3088218	3090960	15	15.8	162	1201	2742	5917	4990	CGGGTAACA	5.3	CTGTGCGCATCTCTCGACAGGTC	11.95	CAGGTAATT	8.55	TTTCCTTCCTGATTTACCAGAGC	8.6	none	TCCTGGAGGCCTGGCACCGGCTCGGGTAACATGGG	6.56154401085674,6.81663643460495	6.1766770552206,6.41680704872809	7.6879040458728,7.98678584463243	7.08584744508961,7.36132315569785	NA	NA	31.5	0.275032	NA	NA	15	0.0586331	NA	NA	15.8	0.0363973	6.68909	6.29674	7.83734	7.22359
RGMA	MATS_only	ENSG00000182175	NA	67076	chr15	-	93616144	93616260	93632147	93632433	93595222	93595737	15	NA	116	286	515	15887	20407	CAGGTAAGG	11.08	TTTCTGAACTCTTCTTCCAGGGA	9.64	AAGGTAAGC	10.22	GTTCGTTCCTTTCTCCTCAGCCA	7.27	none	TTCCTTCTCTGCAGCTTCCCCGCAGGTAAGGCACT	1.03928311298755,1.09097563607316,1.04322652176499,1.05004945519707,1.05594421144764,1.01095053693364	1.56036508811042,1.57495372167898,1.55124014607468,1.5613856015755,1.52369031834981,1.49209911550559	0.483440832127837,0.481907219672548,0.480613692758668,0.483757013182204,0.471695294369299,0.462290295722244	0.563378428343151,0.591371156381434,0.565700798977622,0.569400607996443,0.572194819214387,0.545934400654421	NA	NA	18.3	1	NA	NA	15	0.0433101	NA	NA	NA	NA	1.0484	1.54396	0.477284	0.567997
INCENP	MATS_only	ENSG00000149503	NA	39683	chr11	+	61908971	61908983	61908384	61908516	61912453	61912563	15.1	-34.6	12	132	110	455	3470	GTCGTAAGT	9.9	TTCCCTTGTCTCCTCCACAGTGC	10.47	AAGGTGAGG	9.16	CTCGCTCCCCGCCACCCCAGGAG	6.59	none	GTCTCCTCCACAGTGCAGCTTCGTCGTAAGTAAAG	74.5462775001812,74.3305140341893	60.7302262968698,60.5544514016546	60.9791912521882,60.8026957637593	48.1507027414257,48.0113374657631	NA	NA	-8	0.0114706	NA	NA	15.1	0.0691859	NA	NA	-34.6	0.00134061	74.4384	60.6423	60.8909	48.081
LUC7L3	MATS_only	ENSG00000108848	NA	24039	chr17	+	48815497	48815560	48814647	48814840	48817666	48817706	15.1	-28.4	63	193	40	657	2106	caggtactg	9.04	agccagatgtttttccccaggca	5.15	caggtacca	7.88	AATTATATTTTTTCCCCCAGGTC	11.22	none	agttcctgagaagtgatctctgcaggtactgaccc	138.771132672205,79.3879780882787	133.558127637334,76.4057301126858	119.595058763236,68.4177589512741	125.796287710303,71.9653485564768	NA	NA	20.1	0.0808121	NA	NA	15.1	0.685797	NA	NA	-28.4	0.0112528	109.08	104.982	94.0064	98.8808
GBA2	MATS_only	ENSG00000070610	NA	23163	chr9	-	35741668	35741905	35744293	35744409	35740821	35741061	15.1	-25.6	237	116	240	2388	607	CAGGTGAGG	10.07	TGTGGTTTACCCCGTTCCAGCCT	5.4	CAAGTAAGA	7.61	GTCTAATCTTCTGCCCCCAGGAC	9.92	none	ACCCATCTTGCCCCATGACTACCAGGTGAGGCCCC	10.005	10.5063	13.3249	14.7992	NA	NA	13.4	0.273334	NA	NA	15.1	0.34527	NA	NA	-25.6	0.0274951	10.005	10.5063	13.3249	14.7992
YME1L1	MATS_only	ENSG00000136758	NA	7542	chr10	-	27434356	27434519	27437834	27437969	27423759	27423910	15.1	17	163	135	151	3315	10446	ATGGTATGT	8.35	GTTGACCCAATCTTTTACAGCCT	6.34	GAGGTAAGT	11.08	TGTGTTGTTTGTGTATTCAGGGG	8.64	none	CAATCCTTCTTTGAAAATAAATATGGTATGTTAAT	25.3461485611723,23.7901094271303,24.7525198155948	21.133131354857,19.8357358419395,20.6381751201442	21.4116869293257,20.0971904602675,20.9102066818681	18.0814099320382,16.9713643018313,17.6579276554185	NA	NA	8.1	0.863345	NA	NA	15.1	0.0146958	NA	NA	17	0.0089067	24.6296	20.5357	20.8064	17.5702
PPARGC1B	MATS_only	ENSG00000155846	NA	65736	chr5	+	149210329	149210446	149206235	149206448	149212218	149213341	15.1	18.4	117	213	1123	3881	1772	AAGGTATTT	7.64	CCTCTCTGCTTTTCCCTCAGCTG	9.71	CTGGTAAGA	9.45	TGGCCTCTCTCCCTCTCTAGGCG	12.74	none	TAAAAGTCAACGGCCTTGTGTTAAGGTATTTCTTC	1.20592433656161,1.31285845519664,1.32747353029255	1.5266298445729,1.60797066984798,1.6258710093696	0.994247338547898,1.05535029309645,1.0670987216685	1.18525224527221,1.25729292448995,1.27128942992909	NA	NA	3.2	1	NA	NA	15.1	0.0374973	NA	NA	18.4	1	1.28209	1.58682	1.0389	1.23794
VKORC1	MATS_only	ENSG00000167397	NA	15167	chr16	-	31104632	31104742	31105877	31105923	31102412	31102663	15.2	5.5	110	46	251	1135	1969	TAGGTGAGT	8.83	CCACCCCACCCCTCTGCCAGGTG	8.99	CAGGTGTGC	6.46	GACCCTCTTCTGCCTTGCAGGTT	11.4	none	TTCTACACACTACAGCTATTGTTAGGTGAGTGgct	58.8782405533616,66.1717162975844	54.2235233520378,60.9404012447452	41.5890869738595,46.740888288189	56.276545823703,63.2477395631256	NA	NA	4.9	0.794672	NA	NA	15.2	0.0135346	NA	NA	5.5	0.217088	62.525	57.582	44.165	59.7621
CHCHD7	MATS_only	ENSG00000170791	NA	55138	chr8	+	57125320	57125468	57124347	57124396	57127156	57127226	15.3	12.9	148	49	70	924	1688	TAGGTATTA	4.71	CATTTCCTCTTCAATTCCAGTTA	8.36	GAGGTGAGT	10.03	TTTTTTCTGTCTACCCTCAGTAA	9.33	none	ACTGGGTATATGTGATGTTACCTAGGTATTATTTT	24.2960625694275,23.3972486940267,26.3181015869091,25.5861189890431,23.6709007255358,24.0078530490309	21.8102175029938,21.0033655260044,23.6253721456356,22.9682821491704,21.2490189239694,21.5514960616771	19.1745028795762,18.4651571083086,20.7703002583705,20.1926180767218,18.6811238581134,18.9470473294033	20.7797144232359,20.0109851035324,22.5091054805663,21.8830620917263,20.2450317129304,20.5332172177408	NA	NA	-4.9	0.693704	NA	NA	15.3	0.0270094	NA	NA	12.9	0.0156504	24.546	22.0346	19.3718	20.9935
UBE2B	MATS_only	ENSG00000119048	NA	23184	chr5	+	133724015	133724104	133710073	133710154	133725915	133726474	15.3	15.8	89	81	559	13861	1811	CAGGTAAGT	10.86	TTTTAGTATTGTCTTTGCAGTGT	6.49	TGGGTGAGT	8.73	TTTCTTTTCTTTCCTCCTAGTCT	10.04	none	ATCTTCTATCTTAACATCAATTCAGGTAAGTGTGT	11.6589	8.14037	11.2091	8.17631	NA	NA	2.2	0.621659	NA	NA	15.3	0.126335	NA	NA	15.8	0.0235403	11.6589	8.14037	11.2091	8.17631
C9orf156	MATS_only	ENSG00000136932	NA	38030	chr9	-	100673199	100675257	100675682	100675840	100672449	100672898	15.3	22.3	2058	158	449	425	301	gaggtttgt	6.36	ATATCATTCCTTCCTTGCAGCCT	10.59	AAGGTAACC	9.24	TTCACGTTTTTATGTCATAGGTG	9.41	upstream	ccgtggggaaagcgctctagcagaggtttgtgcac	1.21265	1.69155	2.53868	3.31466	NA	NA	47.6	0.583095	NA	NA	15.3	0.307102	NA	NA	22.3	0.0144818	1.21265	1.69155	2.53868	3.31466
RNF41	MATS_only	ENSG00000181852	NA	61105	chr12	-	56606779	56606922	56607741	56607802	56604031	56604352	15.3	26.8	143	61	321	819	2427	CAGGCAAGT	3.1	TCCTGGGATCTACTGAAAAGACC	-0.95	CAGGTGAGT	10.67	TGCCTTGTTCTCTCTTCTAGGCA	12.86	none	ATGAGGAGAAGCTCACGATTACCAGGCAAGTACAA	4.53293443486596,4.6256230133054,4.41333856324496,4.29989124802942,4.51937663666905	5.30678832736835,5.41526764256078,5.16677527740273,5.03396045362625,5.28038803962654	4.53028560540394,4.62225776096608,4.41075961987391,4.2973785978279,4.51660175199111	5.0746548248989,5.17767855974314,4.94076633044124,4.81376119198122,5.05978005987614	NA	NA	-0.4	0.777947	NA	NA	15.3	0.0125264	NA	NA	26.8	0.00653008	4.47823	5.24064	4.47546	5.01333
RNF41	MATS_only	ENSG00000181852	NA	54223	chr12	-	56606779	56606922	56607741	56607854	56604080	56604352	15.3	26.8	143	113	272	819	2427	CAGGCAAGT	3.1	TCCTGGGATCTACTGAAAAGACC	-0.95	CAGGTGAGT	10.67	TGCCTTGTTCTCTCTTCTAGGCA	12.86	none	ATGAGGAGAAGCTCACGATTACCAGGCAAGTACAA	4.53293443486596,4.6256230133054,4.41333856324496,4.29989124802942,4.51937663666905	5.30678832736835,5.41526764256078,5.16677527740273,5.03396045362625,5.28038803962654	4.53028560540394,4.62225776096608,4.41075961987391,4.2973785978279,4.51660175199111	5.0746548248989,5.17767855974314,4.94076633044124,4.81376119198122,5.05978005987614	NA	NA	-0.4	0.777947	NA	NA	15.3	0.0125264	NA	NA	26.8	0.00653008	4.47823	5.24064	4.47546	5.01333
ALKBH3	MATS_only	ENSG00000166199	NA	73336	chr11	+	43913590	43913679	43911274	43911378	43923065	43923275	15.4	4.1	89	104	210	2212	9386	CACGTATGT	7.26	GCCTGTATTTTCTTTCTTAGATA	9.98	AGGGTAAGT	10.45	TCTTGGTCTGTGGATTGCAGTGG	4.86	none	AATCACTATGGAACCAAATCCTCACGTATGTCAAC	11.0294	11.2175	13.4814	13.0464	NA	NA	2.4	0.804624	NA	NA	15.4	0.0049642	NA	NA	4.1	0.139359	11.0294	11.2175	13.4814	13.0464
SLC7A11	MATS_only	ENSG00000151012	NA	40595	chr4	-	139103450	139103547	139104355	139104459	139101794	139101944	15.4	29	97	104	150	808	1506	TTGGTAATG	4.83	CCACATTTCTCTCCCATCAGGTT	9.49	CAGGTGAGT	10.67	GCTTCCCTTTCCCCCCTCAGCAC	8.69	none	TCCTCTACCAGCTGTTATTGTTTTGGTAATGCATA	3.2132	2.00605	1.66508	1.23109	NA	NA	-17.7	1	NA	NA	15.4	0.00524046	NA	NA	29	1	3.2132	2.00605	1.66508	1.23109
PIGF	MATS_only	ENSG00000151665	NA	47130	chr2	-	46840832	46840924	46844108	46844190	46839366	46839483	15.4	29.9	92	82	117	3184	1349	AGAGTAAGT	9.35	GTTATTCATTTCTCTTTTAGGTA	10.88	TAGGTAAGC	8.89	TAATCTTTTTTTTTTTCTAGGTT	10.84	none	TTCTGTATGGAGCACCACTGATAGAGTAAGTTTGA	10.2383703110774,11.2841182514112	8.73550087606328,9.6277456153499	8.56844692652521,9.4436287624057	7.11039198295783,7.83664797343505	NA	NA	-9.2	0.217878	NA	NA	15.4	0.542514	NA	NA	29.9	0.0342431	10.7612	9.18162	9.00604	7.47352
MRPS28	MATS_only	ENSG00000147586	NA	25980	chr8	-	80915233	80915415	80942288	80942467	80831359	80831383	15.5	-2.9	182	179	24	26873	83850	AGAGTAAGT	9.35	ATATCTCTTTTCATATTTAGGGT	10.18	AAGGTGGAG	1.51	TTTTTTTTTTAACTATTTAGGAA	9.66	none	GTAGAAGACCAGAAGTGGATGGAGAGTAAGTAAAA	14.7417	18.1306	15.452	14.834	NA	NA	18.7	0.035614	NA	NA	15.5	0.0247797	NA	NA	-2.9	0.688541	14.7417	18.1306	15.452	14.834
MFF	MATS_only	ENSG00000168958	NA	52951	chr2	+	228195341	228195562	228189974	228190143	228197134	228197304	15.5	2.3	221	169	170	5198	1572	CAGGTATTT	7.51	TTTAAATTTTTCTCCCACAGGGT	11.63	GGGGTGAGT	7.93	CTTTTCTTGAAAACTCCTAGGAA	5.61	none	GTTCCGGAGAGGATTGTTGTAGCAGGTATTTCACC	17.2969	15.1769	15.5218	11.47	NA	NA	4.7	0.868987	NA	NA	15.5	0.0281676	NA	NA	2.3	0.346824	17.2969	15.1769	15.5218	11.47
PIGF	MATS_only	ENSG00000151665	NA	47125	chr2	-	46842075	46842324	46844108	46844194	46839366	46839483	15.5	31.3	249	86	117	1784	2592	AAGGTAAGG	10.51	CTTTTCTTGTTTTTTGTTAGCTA	7.26	TAGGTAAGC	8.89	TAATCTTTTTTTTTTTCTAGGTT	10.84	none	TAAAAGAAGTTCATTATCACACAAGGTAAGGCTTA	10.2383703110774,11.2841182514112	8.73550087606328,9.6277456153499	8.56844692652521,9.4436287624057	7.11039198295783,7.83664797343505	NA	NA	-13.7	0.0776906	NA	NA	15.5	0.558681	NA	NA	31.3	0.0141228	10.7612	9.18162	9.00604	7.47352
PANX2	MATS_only	ENSG00000073150	NA	15839	chr22	+	50613860	50613911	50609189	50609385	50615367	50615545	15.5	32.3	51	196	178	4475	1456	TAAGTAAAT	1.48	GTCCCTGTTCTCTTCCCCAGGGT	11.81	CAGGTGAgg	10.07	TGTCTCCTCTTTGCCCCCAGAGG	11.48	none	GATTGGCTGTGAGGACAAAACATAAGTAAATAAAA	0.849416421597535,0.835062466162985,0.825759673289609	0.987207689347742,0.970525253245444,0.959713372966825	0.398942298899932,0.392200729236613,0.387831520588498	0.703674617788288,0.691783496016518,0.684076864671642	NA	NA	-27.7	1	NA	NA	15.5	0.0418588	NA	NA	32.3	1	0.836746	0.972482	0.392992	0.693178
C21orf58	MATS_only	ENSG00000160298	NA	41676	chr21	-	47738698	47738875	47742552	47743783	47737925	47738134	15.6	10.3	177	1231	209	3677	564	AAGGTGGGA	6.03	TCTGCCCCTCGGGTCCACAGGTC	10.11	GTGGTGAGC	6.64	GGGCTCTTCTCTTCCCTCAGGCT	8.83	upstream	CCTGCCCAGTGCCCCCAGCCCCAAGGTGGGACATA	25.5632	28.8755	15.9188	22.145	NA	NA	-0.6	0.630174	NA	NA	15.6	0.0189798	NA	NA	10.3	0.506878	25.5632	28.8755	15.9188	22.145
DGUOK	MATS_only	ENSG00000114956	NA	34694	chr2	+	74184251	74184367	74154034	74154179	74185272	74185372	15.6	11.5	116	145	100	30072	905	GAAGTAAGT	9.82	GCTTGGGGACTGTCTTTTAGGTT	7.11	TTGGTAAGG	8.92	AACGTTCACGCTTCTTATAGGCT	7.59	none	CCTGGCTTATTCACAAGACAACGAAGTAAGTGGGG	45.6536805953207,35.1182158425544	52.0507124506403,40.0390095774156	68.8612078686519,52.970159898963	84.9004637784094,65.3080490603149	NA	NA	2.6	0.852146	NA	NA	15.6	0.00991435	NA	NA	11.5	0.0330893	40.3859	46.0449	60.9157	75.1043
DGUOK	MATS_only	ENSG00000114956	NA	30987	chr2	+	74184251	74184367	74153952	74154179	74185272	74185372	15.6	11.5	116	227	100	30072	905	GAAGTAAGT	9.82	GCTTGGGGACTGTCTTTTAGGTT	7.11	TTGGTAAGG	8.92	AACGTTCACGCTTCTTATAGGCT	7.59	none	CCTGGCTTATTCACAAGACAACGAAGTAAGTGGGG	45.6536805953207,35.1182158425544	52.0507124506403,40.0390095774156	68.8612078686519,52.970159898963	84.9004637784094,65.3080490603149	NA	NA	2.6	0.852146	NA	NA	15.6	0.00991435	NA	NA	11.5	0.0330893	40.3859	46.0449	60.9157	75.1043
NQO2	MATS_only	ENSG00000124588	NA	6833	chr6	+	3002283	3002520	3000207	3000319	3006701	3006793	15.6	17.6	237	112	92	1964	4181	AAGGTAAAT	8.88	TTCTTATTCTTAACCGCTAGGGG	7.11	AAGGTGAGT	10.47	GGGTTCGTTTTGTCTTCCAGATT	9.73	none	AGAAACACTGGCAACATTTACAAAGGTAAATCATT	11.0372	10.9282	12.9677	15.3841	NA	NA	3.4	0.303296	NA	NA	15.6	0.0255559	NA	NA	17.6	0.00323453	11.0372	10.9282	12.9677	15.3841
LIAS	MATS_only	ENSG00000121897	NA	49903	chr4	+	39469137	39469266	39462409	39462582	39471638	39471784	15.6	17.6	129	173	146	6555	2372	GAGGTGAAT	5.37	ATTCTCTCTTTTCCCCTTAGGAA	12.14	AAGGTAATT	8.83	ACAGTCCTGCTGTTTTCCAGTAA	6.26	downstream	TAGAAACAGTCCCGGAATTACAGAGGTGAATACGT	3.1514419916972,2.94718186260572	2.92205550796324,2.73266302133599	2.77002312001023,2.59048458445401	2.34595976122105,2.1939068137345	NA	NA	-2	1	NA	NA	15.6	0.035618	NA	NA	17.6	1	3.04931	2.82736	2.68025	2.26993
GAPVD1	MATS_only	ENSG00000165219	NA	67583	chr9	+	128097450	128097531	128094788	128094908	128099296	128099374	15.7	21.7	81	120	78	2542	1765	ctagtaagc	5.2	acatgtccgtgtgaggccagatt	-1.06	ACGGTAAGA	10.65	CAGTTTCCCTCCTGTTTTAGGTG	11.36	none	gacatgagaatccagctgtcttctagtaagctgta	7.40785	7.04271	6.98877	6.46844	NA	NA	-1.9	0.87808	NA	NA	15.7	0.0154724	NA	NA	21.7	0.0210137	7.40785	7.04271	6.98877	6.46844
NEIL3	MATS_only	ENSG00000109674	NA	65806	chr4	+	178272533	178272703	178257261	178257475	178274461	178274882	15.7	25.3	170	214	421	15058	1758	TTGGTAAGA	8.85	TTTTAAAAATTATCTTATAGCAA	6.6	AAAGTAAGT	9.72	TTACTTCTCTCTCCTTCCAGATT	13.04	none	GCTTGCTTGACCTCAAGGCCTATTGGTAAGACTGA	37.8578	32.0372	12.3308	9.86267	NA	NA	-2.8	0.484717	NA	NA	15.7	0.00473814	NA	NA	25.3	0.0782772	37.8578	32.0372	12.3308	9.86267
PMF1,PMF1-BGLAP	MATS_only	ENSG00000160783	NA	39764	chr1	+	156195347	156195459	156182796	156182967	156203418	156203519	15.7	60.1	112	171	101	12380	7959	AAGGCAAGT	3.24	CCTGTTTGTTTTGTTCTCAGCTC	8.91	CAGGTAAAG	9.65	CTTTCCTCCTTTCTCTTCAGGAG	12.58	none	GTGCAGGTTACCACAGGGGAGGAAGGCAAGTCCTG	27.4389813284432,22.7305994497511,34.119776782325,22.6096920058695,24.0374482399819,29.2195960742251	31.2597336230316,25.7682236882481,38.8707992008132,25.6311586686297,27.249714399825,33.2882908049518	27.1648804747034,22.1236939802522,33.7789383294138,22.006014756953,23.395649996082,28.9277078246576	35.3164475245262,28.6209456107501,43.9152347478891,28.4687065383525,30.2664476675415,37.6082595447348	NA	NA	-41	0.106105	NA	NA	15.7	0.042419	NA	NA	60.1	0.120555	26.6927	30.3447	26.2328	34.0327
METTL8	MATS_only	ENSG00000123600	NA	70381	chr2	-	172248552	172248707	172291183	172291290	172216931	172217023	15.8	-3.6	155	107	92	42476	31529	GTGGTGAGT	8.95	AATCATTTGTAACTTTTTAGGTA	8.36	CAGGTTGGT	8.08	AGTCTATTTTTTTTTAATAGGGA	7.37	none	CCAAAGTTTTTGAACACAACATGTGGTGAGTTTTC	1.78251	2.03418	1.63063	1.46946	NA	NA	5.2	0.300973	NA	NA	15.8	0.0246119	NA	NA	-3.6	0.443346	1.78251	2.03418	1.63063	1.46946
ABI1	MATS_only	ENSG00000136754	NA	72292	chr10	-	27047990	27048167	27054146	27054247	27040526	27040712	15.9	-0.4	177	101	186	5979	7278	CAAGTAAGC	7.47	CTTTGACTAATGCTTTTCAGCAG	5	CAGGTGTGT	6.99	AATCATATGAATCTTTTTAGTTG	4.38	none	GGTCCACTTTATTCTCAAAATTCAAGTAAGCTTGT	16.6533768970574,16.3229709624781,16.0574848530315,16.6674343339429,16.2691737497482,18.5809478114282,15.9022984222371,17.6035844347201,17.5254620185897,17.0856826140274,16.7380790118206,16.2557798086809	12.857368384326,12.6022759280924,12.3973053247621,12.8682215371546,12.5607413740861,14.3455644112445,12.2774924410866,13.5909834600438,13.5306684446886,13.1911333553641,12.9227633068798,12.5504004783336	18.4111143916917,18.0458346352294,17.7523268883837,18.4266555687246,17.9863592120976,20.5421373561002,17.5807607761738,19.4616148265223,19.3752467133868,18.8890492908126,18.5047566802055,17.9715515618132	11.5727272990133,11.343122348468,11.1586313371077,11.5824960615054,11.3057377101319,12.9122305528828,11.0507895308967,12.2330433885855,12.1787547344942,11.8731442176494,11.6315883025121,11.2964300226648	NA	NA	-9.9	0.119122	NA	NA	15.9	0.0138147	NA	NA	-0.4	0.490517	16.8052	12.9746	18.579	11.6782
FAM133B	MATS_only	ENSG00000234545	NA	25264	chr7	-	92195323	92195375	92199136	92199229	92190450	92191682	15.9	4.5	52	93	1232	3761	3641	CAAGTATCT	1.57	CAAAAATTTAAACTTTCTAGGTG	6.47	GAGGTAAGT	11.08	ACATGGAATTATCTTTACaggaa	7.82	none	GAAGAACGAGAAAAAGCAACAGCAAGTATCTCTTA	48.3887859357848,56.5030501441405,46.447744684714	22.217505548033,25.7863439441354,21.3262847014952	58.8725403039328,68.6077574537249,56.5109594732645	40.6016580844233,46.8056801890456,38.9729854141	NA	NA	10.7	0.0284744	NA	NA	15.9	0.00992227	NA	NA	4.5	0.27785	50.4465	23.11	61.3304	42.1268
[truncated: 544 more rows]
[truncated: 9 more columns]

## Sheet: S2B hnRNP L repressed exons
Delta PSIs are LKD-WT : a negative deltaPSI indicates an L enhanced exon, a positive deltaPSI indicates an L repressed exon
[truncated: 878 more rows]
[truncated: 9 more columns]

## Sheet: S2C hnRNP L enhanced exons
Delta PSIs are LKD-WT : a negative deltaPSI indicates an L enhanced exon, a positive deltaPSI indicates an L repressed exon
[truncated: 439 more rows]
[truncated: 9 more columns]

[truncated: 3 more sheets: Table S2D stringent repressed, Table S2E stringent enhanced, Table S2F stringent unresponsiv]
