# Supplementary material
Source: HighWire-hosted journal article supplement (doi:10.1101/rna.052969.115)
Supplement: Table_S6.xlsx [file Table_S6.xlsx]

## Sheet: Repressed Upstream
kmer	Hits	Misses	Total intervals	Hit fraction	refGene hits	refGene misses	refGene total	refGene hit fraction	p value	Lower 95% CI	Upper 95% CI
TACCCG	9	230	239	0.0376569	2276	303219	305495	0.0074502	9.17901e-05	0.0197832	1
CCCGGT	13	226	239	0.0543933	4835	300660	305495	0.0158268	0.000136144	0.0324702	1
ACCCGG	16	223	239	0.0669456	7194	298301	305495	0.0235487	0.000206337	0.0424387	1
CCTTTA	29	210	239	0.121339	18666	286829	305495	0.0611008	0.000361193	0.0881798	1
ATGTCG	8	231	239	0.0334728	2221	303274	305495	0.00727017	0.000415711	0.0167628	1
AGGCAC	26	213	239	0.108787	16196	289299	305495	0.0530156	0.000456186	0.0773535	1
TACATT	34	205	239	0.142259	23806	281689	305495	0.077926	0.000505805	0.106486	1
CCATAG	19	220	239	0.0794979	10292	295203	305495	0.0336896	0.000544461	0.0526819	1
ATACAC	18	221	239	0.0753138	9872	295623	305495	0.0323148	0.000874128	0.0492412	1
GCAGTC	21	218	239	0.0878661	12567	292928	305495	0.0411365	0.000994248	0.0596331	1
Grey text indicated below significance threshold. All signfiicantly enriched hexamers are shown as well as the top 10 below the significance threshold

## Sheet: Repressed Within
kmer	Hits	Misses	Total intervals	Hit fraction	refGene hits	refGene misses	refGene total	refGene hit fraction	p value	Lower 95% CI	Upper 95% CI
CATTCC	22	223	245	0.0897959	10234	295218	305452	0.0335044	3.26571e-05	0.0615738	1
TGATAC	13	232	245	0.0530612	5150	300302	305452	0.0168603	0.000316997	0.0316678	1
TCACAC	16	229	245	0.0653061	7444	298008	305452	0.0243704	0.0003954	0.0413884	1
CATTTC	19	226	245	0.077551	10172	295280	305452	0.0333015	0.000640963	0.0513764	1
GGGTTA	8	237	245	0.0326531	2457	302995	305452	0.00804382	0.000936286	0.0163497	1
TTGCCG	10	235	245	0.0408163	3736	301716	305452	0.0122311	0.000997304	0.0223087	1
GGTGTT	17	228	245	0.0693878	9009	296443	305452	0.029494	0.00110139	0.0446914	1
TAAAAG	17	228	245	0.0693878	9050	296402	305452	0.0296282	0.00115593	0.0446914	1
TCTATA	11	234	245	0.044898	4557	300895	305452	0.0149189	0.00129096	0.0253799	1
CACATG	18	227	245	0.0734694	9992	295460	305452	0.0327122	0.00132505	0.0480214	1
Grey text indicated below significance threshold. All signfiicantly enriched hexamers are shown as well as the top 10 below the significance threshold

## Sheet: Repressed Downstream
kmer	Hits	Misses	Total intervals	Hit fraction	refGene hits	refGene misses	refGene total	refGene hit fraction	p value	Lower 95% CI	Upper 95% CI
CATATC	19	216	235	0.0808511	10111	295384	305495	0.0330971	0.000357176	0.0535897	1
TAAGCG	7	228	235	0.0297872	1878	303617	305495	0.0061474	0.000705108	0.0140618	1
GGAGTC	28	207	235	0.119149	19417	286078	305495	0.0635591	0.00109427	0.0860193	1
TGTACT	24	211	235	0.102128	15842	289653	305495	0.0518568	0.0013123	0.0714249	1
GACTAC	14	221	235	0.0595745	7096	298399	305495	0.0232279	0.00135383	0.0363724	1
ACGTGG	15	220	235	0.0638298	8077	297418	305495	0.0264391	0.00165824	0.0397538	1
TGATTC	27	208	235	0.114894	19097	286398	305495	0.0625117	0.00178063	0.0823473	1
AGTTTC	31	204	235	0.131915	23675	281820	305495	0.0774972	0.00267154	0.0971188	1
AAACGC	7	228	235	0.0297872	2382	303113	305495	0.00779718	0.00269635	0.0140618	1
GTTTGT	33	202	235	0.140426	25963	279532	305495	0.0849867	0.00309078	0.104582	1
Grey text indicated below significance threshold. All signfiicantly enriched hexamers are shown as well as the top 10 below the significance threshold

## Sheet: Enhanced Upstream
kmer	Hits	Misses	Total intervals	Hit fraction	refGene hits	refGene misses	refGene total	refGene hit fraction	p value	Lower 95% CI	Upper 95% CI
CCGCGG	17	163	180	0.0944444	3658	301837	305495	0.011974	9.49174e-11	0.0610739	1
TCCGCG	12	168	180	0.0666667	1671	303824	305495	0.00546981	5.09922e-10	0.0389148	1
CGCGGC	15	165	180	0.0833333	3212	302283	305495	0.0105141	1.17845e-09	0.0520688	1
GCGGCG	15	165	180	0.0833333	3582	301913	305495	0.0117252	5.01136e-09	0.0520688	1
GGGCGG	26	154	180	0.144444	12463	293032	305495	0.0407961	2.61029e-08	0.103225	1
GGCGGC	20	160	180	0.111111	7589	297906	305495	0.0248417	3.10101e-08	0.0748622	1
GGGGCG	24	156	180	0.133333	10838	294657	305495	0.0354768	3.16189e-08	0.0936702	1
GGCGCG	13	167	180	0.0722222	3036	302459	305495	0.00993797	4.23519e-08	0.0432459	1
GCGGTG	18	162	180	0.1	6563	298932	305495	0.0214832	8.81976e-08	0.0656355	1
GCGGCC	18	162	180	0.1	7095	298400	305495	0.0232246	2.73878e-07	0.0656355	1
GGGCGT	16	164	180	0.0888889	6524	298971	305495	0.0213555	2.00011e-06	0.0565506	1
GCGCGG	11	169	180	0.0611111	3153	302342	305495	0.010321	3.3801e-06	0.0346458	1
CTGGCG	16	164	180	0.0888889	6955	298540	305495	0.0227663	4.47118e-06	0.0565506	1
AGGGCG	16	164	180	0.0888889	7205	298290	305495	0.0235847	6.92798e-06	0.0565506	1
GGGCGC	16	164	180	0.0888889	7248	298247	305495	0.0237254	7.45517e-06	0.0565506	1
GGGCCG	19	161	180	0.105556	9997	295498	305495	0.0327239	8.48658e-06	0.0702324	1
CCGCCC	20	160	180	0.111111	11316	294179	305495	0.0370415	1.38513e-05	0.0748622	1
CGTCCG	7	173	180	0.0388889	1376	304119	305495	0.00450417	2.05809e-05	0.0183916	1
CGCCCC	17	163	180	0.0944444	8818	296677	305495	0.0288646	2.16652e-05	0.0610739	1
CGGTGG	15	165	180	0.0833333	7075	298420	305495	0.0231591	2.30666e-05	0.0520688	1
GGCGGT	12	168	180	0.0666667	4772	300723	305495	0.0156206	3.11502e-05	0.0389148	1
CGCGGT	7	173	180	0.0388889	1478	304017	305495	0.00483805	3.22908e-05	0.0183916	1
CCCGCG	10	170	180	0.0555556	3433	302062	305495	0.0112375	4.33528e-05	0.030447	1
CGCCGG	9	171	180	0.05	2750	302745	305495	0.00900178	4.35349e-05	0.0263288	1
CGCGCG	7	173	180	0.0388889	1588	303907	305495	0.00519812	5.05641e-05	0.0183916	1
CCCGGC	20	160	180	0.111111	12432	293063	305495	0.0406946	5.15444e-05	0.0748622	1
Grey text indicated below significance threshold. All signfiicantly enriched hexamers are shown as well as the top 10 below the significance threshold

## Sheet: Enhanced Within
kmer	Hits	Misses	Total intervals	Hit fraction	refGene hits	refGene misses	refGene total	refGene hit fraction	p value	Lower 95% CI	Upper 95% CI
GCGGCG	17	170	187	0.0909091	5722	299730	305452	0.0187329	1.1694e-07	0.0587543	1
TAGTCC	11	176	187	0.0588235	2422	303030	305452	0.00792923	3.94007e-07	0.0333351	1
TCGCGC	8	179	187	0.0427807	1457	303995	305452	0.00476998	4.00637e-06	0.0214626	1
GGCGGC	20	167	187	0.106952	10266	295186	305452	0.0336092	6.03312e-06	0.0720139	1
TGTCCC	21	166	187	0.112299	12246	293206	305452	0.0400914	2.33493e-05	0.0764953	1
CGGCGG	14	173	187	0.0748663	6012	299440	305452	0.0196823	2.42216e-05	0.0458267	1
GACGCC	15	172	187	0.0802139	6891	298561	305452	0.02256	2.67518e-05	0.0500936	1
CGTGCG	10	177	187	0.0534759	3469	301983	305452	0.0113569	6.51422e-05	0.0292961	1
TCGCGA	5	182	187	0.026738	737	304715	305452	0.00241282	0.000102565	0.0105934	1
TTTCTC	18	169	187	0.0962567	10960	294492	305452	0.0358813	0.000156619	0.0631411	1
GGCGCC	14	173	187	0.0748663	7636	297816	305452	0.024999	0.000291856	0.0458267	1
TGTAGT	9	178	187	0.0481283	3431	302021	305452	0.0112325	0.000301048	0.0253343	1
GGGAAG	25	162	187	0.13369	19163	286289	305452	0.0627365	0.000303209	0.0946806	1
GTCCCC	17	170	187	0.0909091	10607	294845	305452	0.0347256	0.000316767	0.0587543	1
Grey text indicated below significance threshold. All signfiicantly enriched hexamers are shown as well as the top 10 below the significance threshold

## Sheet: Enhanced Downstream
kmer	Hits	Misses	Total intervals	Hit fraction	refGene hits	refGene misses	refGene total	refGene hit fraction	p value	Lower 95% CI	Upper 95% CI
GGGGGC	36	138	174	0.206897	31019	274476	305495	0.101537	2.81649e-05	0.157565	1
TGGGGG	45	129	174	0.258621	44715	260780	305495	0.146369	7.72085e-05	0.20456	1
ACCAGC	27	147	174	0.155172	21653	283842	305495	0.0708784	0.000104539	0.111843	1
GGCGGG	24	150	174	0.137931	18479	287016	305495	0.0604887	0.000144216	0.0969652	1
CTGCGT	12	162	174	0.0689655	6338	299157	305495	0.0207467	0.000312901	0.0402731	1
CGGCGG	9	165	174	0.0517241	3732	301763	305495	0.0122162	0.000325152	0.0272456	1
GGTCCC	24	150	174	0.137931	19621	285874	305495	0.0642269	0.000347757	0.0969652	1
AGGCGA	9	165	174	0.0517241	3857	301638	305495	0.0126254	0.000411863	0.0272456	1
GCGGGC	15	159	174	0.0862069	9873	295622	305495	0.032318	0.00058117	0.0538901	1
CTCCTG	42	132	174	0.241379	45544	259951	305495	0.149083	0.000914365	0.188774	1
Grey text indicated below significance threshold. All signfiicantly enriched hexamers are shown as well as the top 10 below the significance threshold
